# Supplementary material for: Companion cells with high florigen production express other small proteins and reveal a nitrogen-sensitive FT repressor
Source: bioRxiv preprint, doi:10.1101/2024.08.17.608367, version 2 (2025-08-08)
Supplement: Supplemental data 1 [file 608367_file03.xlsx]

## Sheet: DataS1_35Sc_v_FTc
Row.names	baseMean	log2FoldChange	lfcSE	stat	pvalue	padj	35S_C1.counts	35S_C2.counts	35S_C3.counts	FT_C1.counts	FT_C2.counts	FT_C3.counts
AT1G01010	40.9606	1.27949	0.694176	1.84318	0.0653029	0.230877	12.6537	28.4294	30.7707	38.286	66.8089	68.815
AT1G01020	1211.79	0.206367	0.195707	1.05447	0.291669	0.559989	1263.96	1002.61	1109.32	1418.32	1328.54	1147.96
AT1G01030	387.292	1.36596	0.278411	4.90627	9.28e-07	3.65e-05	232.688	178.157	238.276	581.251	438.075	655.306
AT1G01040	642.461	0.158123	0.242055	0.653251	0.513594	0.754905	726.885	541.421	553.873	558.628	674.77	799.192
AT1G01046	0	NA	NA	NA	NA	NA	0	0	0	0	0	0
AT1G01050	1296.59	-0.358406	0.181181	-1.97816	0.0479102	0.188565	1443.23	1554.14	1372.06	1129.44	1067.03	1213.65
AT1G01060	135.837	-0.839298	0.394419	-2.12794	0.0333423	0.149514	162.389	192.688	168.844	80.0526	125.028	86.0187
AT1G01070	2.00612	-3.98793	3.69041	-1.08062	0.279866	NA	11.2477	0	0.788993	0	0	0
AT1G01073	0.117164	0.00155855	4.08047	0.000381954	0.999695	NA	0.702983	0	0	0	0	0
AT1G01080	311.746	0.165042	0.339922	0.485528	0.627302	0.830695	416.869	176.262	288.771	360.237	331.181	297.156
AT1G01090	857.851	-0.16068	0.231271	-0.694772	0.487198	0.735286	859.749	1068.94	787.415	962.371	822.704	645.922
AT1G01100	1002.8	-0.284329	0.208808	-1.36168	0.1733	0.417085	894.898	1218.67	1189.8	979.774	882.832	850.803
AT1G01110	26.5733	0.289385	1.41203	0.204942	0.837618	0.939387	66.7834	0	4.73396	55.6888	0.954413	31.2795
AT1G01115	0.521325	2.98828	4.02655	0.742144	0.458	NA	0	0	0	0	0	3.12795
AT1G01120	429.366	-1.33629	0.28491	-4.69022	2.73e-06	8.93e-05	674.161	523.1	650.919	177.508	315.911	234.596
AT1G01130	440.997	0.076199	0.277028	0.275059	0.783271	0.914344	362.036	569.219	355.836	506.42	416.124	436.349
AT1G01140	7767.91	0.204975	0.160984	1.27326	0.202926	0.458181	7518.41	7269.7	6864.24	7074.21	8751.96	9128.93
AT1G01150	11.3176	-0.433299	1.21927	-0.355377	0.722307	0.883899	13.3567	6.9494	18.9358	8.70137	15.2706	4.69193
AT1G01160	1045.46	0.362825	0.202228	1.79414	0.0727908	0.24818	1042.52	919.216	781.892	1110.29	1134.8	1284.02
AT1G01170	1674.49	-0.334737	0.177462	-1.88624	0.059262	0.216821	1836.9	2070.29	1696.33	1538.4	1514.65	1390.37
AT1G01180	258.861	-0.87669	0.346131	-2.53282	0.0113148	0.0709522	384.532	352.524	270.624	135.741	259.6	150.142
AT1G01183	2.33755	-1.64353	3.52341	-0.466461	0.640886	NA	10.5448	0	0	3.48055	0	0
AT1G01190	0.392161	0.980902	4.07804	0.240533	0.809917	NA	0	0	0.788993	0	0	1.56398
AT1G01200	0	NA	NA	NA	NA	NA	0	0	0	0	0	0
AT1G01210	209.695	-0.485691	0.363174	-1.33735	0.181109	0.428227	277.678	273.554	183.835	116.598	215.697	190.805
AT1G01220	296.991	-0.0176219	0.337572	-0.0522018	0.958368	0.984428	340.947	302.615	251.689	259.301	200.427	426.966
AT1G01225	13.0603	-0.885706	1.60467	-0.551954	0.58098	0.802901	0	48.6458	2.36698	1.74027	16.225	9.38386
AT1G01230	484.22	-0.262757	0.271254	-0.968673	0.332709	0.602476	453.424	559.111	570.442	438.549	325.455	558.34
AT1G01240	1318.4	0.0312715	0.182555	0.171299	0.863988	0.949835	1353.95	1314.07	1242.66	1411.36	1190.15	1398.19
AT1G01250	23.8684	-1.81797	1.06188	-1.71203	0.0868915	0.276373	37.9611	35.3788	37.8716	24.3638	7.6353	0
AT1G01260	527.526	-0.163454	0.295123	-0.55385	0.579681	0.802293	411.245	602.071	661.176	388.081	688.132	414.454
AT1G01270	1.38227	1.60328	3.86764	0.414538	0.67848	NA	1.40597	0.631763	0	0	0	6.25591
AT1G01280	0	NA	NA	NA	NA	NA	0	0	0	0	0	0
AT1G01290	1033.36	0.688446	0.229866	2.99498	0.00274459	0.0250079	990.504	678.514	703.781	1385.26	1029.81	1412.27
AT1G01300	248.75	-0.968757	0.304841	-3.17791	0.00148343	0.0158765	345.868	349.997	292.716	168.807	192.791	142.322
AT1G01305	4.4195	0.127231	2.31449	0.0549716	0.956161	0.983741	0.702983	12.0035	0	5.22082	8.58971	0
AT1G01310	25.6345	1.38694	1.17864	1.17673	0.239303	0.501586	0	29.0611	13.4129	60.9096	41.0397	9.38386
AT1G01320	3484.57	0.930806	0.183716	5.06656	4.05e-07	1.77e-05	2776.78	2255.4	2161.05	4096.6	4232.82	5384.77
AT1G01340	100.806	2.10194	0.694661	3.02585	0.00247937	0.0232536	71.0013	3.15882	40.2386	175.768	148.888	165.781
AT1G01350	286.087	0.114942	0.317955	0.361504	0.717723	0.881768	203.865	369.582	250.9	268.002	325.455	298.719
AT1G01355	60.5579	1.61518	0.61351	2.63269	0.00847127	0.0579101	44.9909	31.5882	12.6239	87.0137	79.2163	107.914
AT1G01360	206.377	0.367826	0.410939	0.895087	0.37074	0.640228	170.122	126.353	245.377	123.559	305.412	267.44
AT1G01370	17.5327	-0.610704	1.1097	-0.550333	0.582091	0.803731	11.2477	44.8552	7.10093	24.3638	6.68089	10.9478
AT1G01380	1.30565	1.99725	3.91084	0.510696	0.609564	NA	0	0	1.57799	0	0	6.25591
AT1G01390	32.3874	-0.233753	0.862896	-0.270893	0.786473	0.916229	66.7834	15.1623	22.8808	19.143	17.1794	53.1752
AT1G01400	0	NA	NA	NA	NA	NA	0	0	0	0	0	0
AT1G01410	0	NA	NA	NA	NA	NA	0	0	0	0	0	0
AT1G01420	191.87	-1.15698	0.429573	-2.69332	0.00707447	0.0506849	328.293	179.421	285.615	120.079	61.0824	176.729
AT1G01430	3056.64	-0.581612	0.233939	-2.48617	0.0129128	0.077896	3538.12	3940.94	3510.23	3179.48	1523.24	2647.81
AT1G01440	489.935	-0.0607209	0.309362	-0.196278	0.844393	0.94232	506.148	510.465	486.808	299.327	717.718	419.146
AT1G01448	604.364	0.456217	0.240988	1.89311	0.0583432	0.214764	407.027	499.725	621.726	734.395	642.32	720.993
AT1G01450	0	NA	NA	NA	NA	NA	0	0	0	0	0	0
AT1G01453	3.55395	-1.6753	2.69179	-0.622374	0.533696	0.770037	0	8.21293	7.88993	5.22082	0	0
AT1G01460	167.683	-1.06618	0.538474	-1.97999	0.0477042	0.187934	66.0804	196.478	418.166	144.443	101.168	79.7628
AT1G01470	12578.1	0.377559	0.195271	1.93352	0.0531728	0.202466	8754.25	11537.3	12533.9	11282.2	14271.3	17089.6
AT1G01471	1.83865	-2.65866	3.86833	-0.68729	0.4919	NA	0	0	9.46791	0	0	1.56398
AT1G01480	87.53	-0.941607	0.567854	-1.65818	0.0972802	0.29643	202.459	77.7069	64.6974	59.1693	42.9486	78.1988
AT1G01490	2305.21	0.348728	0.189464	1.84061	0.0656794	0.231884	2237.6	1918.67	1925.14	2908	2072.03	2769.8
AT1G01500	327.379	-0.238969	0.298972	-0.799304	0.424114	0.686273	397.889	364.528	299.817	274.963	237.649	389.43
AT1G01510	201.307	0.0263319	0.406645	0.0647541	0.94837	0.98093	147.627	241.965	207.505	321.951	135.527	153.27
AT1G01520	149.616	0.341055	0.473045	0.720978	0.470923	0.721863	134.973	135.829	126.239	60.9096	239.558	200.189
AT1G01530	4.74367	1.40667	2.44004	0.576495	0.56428	0.791198	0	0	7.88993	0	14.3162	6.25591
AT1G01540	585.361	-0.190587	0.246153	-0.774263	0.438775	0.697771	489.276	736.004	645.396	593.433	477.206	570.851
AT1G01550	5228.19	-0.203245	0.150007	-1.3549	0.175449	0.42086	5344.78	5646.07	5798.31	4670.89	5179.6	4729.46
AT1G01560	135.428	-0.752896	0.436248	-1.72585	0.0843752	0.271663	175.746	211.641	123.872	69.6109	144.116	87.5827
AT1G01570	16.453	-2.10206	1.32889	-1.58182	0.113691	0.326049	23.9014	13.267	42.6056	1.74027	0	17.2037
AT1G01580	1.6003	1.97366	3.63694	0.542669	0.587358	NA	0.702983	1.26353	0	0	7.6353	0
AT1G01590	5.14454	0.936045	2.39012	0.391632	0.69533	0.870589	4.2179	6.31763	0	0	0	20.3317
AT1G01600	2.17955	1.85031	3.25303	0.568796	0.569494	NA	2.81193	0	0	8.70137	0	1.56398
AT1G01610	147.636	-0.843859	0.447007	-1.8878	0.0590532	0.216366	148.33	157.309	261.946	160.105	65.8545	92.2746
AT1G01620	4225.84	-0.0749262	0.203194	-0.368743	0.71232	0.879563	3602.79	4981.46	4419.15	4971.96	3142.88	4236.81
AT1G01630	327.576	-0.859295	0.265004	-3.24257	0.00118457	0.0133642	448.503	411.278	407.909	226.236	251.011	220.521
AT1G01640	12.8691	0.929768	1.16975	0.79484	0.426707	0.688206	4.92088	14.5306	7.10093	24.3638	20.0427	6.25591
AT1G01650	972.236	1.11612	0.266211	4.19261	2.76e-05	0.000632954	519.505	591.962	729.818	1028.5	1055.58	1908.05
AT1G01660	6.69859	0.0501075	2.31873	0.0216099	0.982759	0.993287	19.6835	0	0	1.74027	0	18.7677
AT1G01670	14.2001	1.80068	1.4032	1.28327	0.199399	0.453359	5.62387	0	13.4129	45.2471	16.225	4.69193
AT1G01680	10.2608	-0.290287	2.02844	-0.143108	0.886205	0.959011	33.7432	0	0	12.1819	0	15.6398
AT1G01690	26.96	0.403461	0.963589	0.418706	0.675431	0.859103	7.02983	35.3788	26.8257	62.6499	9.54413	20.3317
AT1G01695	1.45053	-0.466119	3.79831	-0.122718	0.902331	NA	0	5.05411	0	1.74027	1.90883	0
AT1G01700	35.4206	0.691444	1.00288	0.689457	0.490536	0.737605	45.6939	1.26353	34.7157	15.6625	79.2163	35.9715
AT1G01710	692.014	0.696375	0.241065	2.88875	0.00386779	0.0324014	585.585	452.343	545.983	781.383	713.901	1072.89
AT1G01720	5073.07	-0.146887	0.223162	-0.658208	0.510404	0.752512	3627.39	5677.66	6689.08	3943.46	4879.91	5620.93
AT1G01725	608.953	0.326869	0.290813	1.12398	0.261021	0.526429	518.099	437.812	663.543	701.33	435.212	897.722
AT1G01730	598.446	0.550887	0.31048	1.77431	0.0760119	0.255265	268.54	519.31	668.277	793.565	579.329	761.656
AT1G01740	92.727	0.380384	0.453111	0.839493	0.401193	0.666794	68.1894	99.1869	74.1653	120.079	104.031	90.7106
AT1G01750	74.6202	0.0251267	0.547921	0.0458583	0.963423	0.98604	118.804	58.1222	44.9726	76.572	77.3074	71.9429
AT1G01760	148.713	1.00036	0.368925	2.71155	0.00669696	0.0487082	102.636	102.346	92.3121	167.066	187.065	240.852
AT1G01770	1063.33	0.863274	0.207653	4.15728	3.22e-05	0.000719199	748.677	842.772	669.855	1557.54	1151.98	1409.14
AT1G01780	310.058	-0.0478221	0.330104	-0.14487	0.884814	0.958552	387.344	362.632	194.881	288.885	265.327	361.279
AT1G01790	1144.78	0.412223	0.22987	1.79329	0.0729265	0.248435	1065.02	757.484	1123.53	1322.61	1046.99	1553.03
AT1G01800	995.888	-0.217378	0.199982	-1.08699	0.277042	0.544438	1097.36	917.321	1198.48	878.838	949.641	933.694
AT1G01810	41.6626	0.552425	0.712924	0.774872	0.438415	0.697685	37.9611	42.3282	20.5138	73.0915	22.9059	53.1752
AT1G01820	439.231	0.746968	0.248617	3.0045	0.00266018	0.024452	331.808	317.777	335.322	452.471	614.642	583.363
AT1G01830	300.402	-1.57166	0.342547	-4.58814	4.47e-06	0.000137482	565.902	421.386	359.781	219.274	125.028	111.042
AT1G01840	64.1504	-0.737042	0.609358	-1.20954	0.226456	0.485778	75.2192	57.4905	108.881	40.0263	78.2618	25.0236
AT1G01860	103.287	1.09575	0.437801	2.50285	0.0123198	0.0755196	52.7238	61.9128	82.8442	163.586	128.846	129.81
AT1G01870	0	NA	NA	NA	NA	NA	0	0	0	0	0	0
AT1G01880	15.158	-1.62262	1.43554	-1.13032	0.258342	0.5231	1.40597	38.5376	28.4037	6.96109	0	15.6398
AT1G01890	0.842351	-2.74229	3.94373	-0.695356	0.486832	NA	0	5.05411	0	0	0	0
AT1G01900	4.65557	-1.26214	2.54207	-0.496499	0.619542	0.826675	0	19.5847	0	5.22082	0	3.12795
AT1G01910	516.323	0.467128	0.246443	1.89548	0.0580293	0.213955	404.918	507.306	388.973	560.368	701.493	534.88
AT1G01920	172.964	-0.519645	0.379722	-1.36849	0.171159	0.41339	284.005	159.836	168.055	132.261	162.25	131.374
AT1G01930	152.035	0.0623314	0.412986	0.150929	0.880032	0.956654	179.261	92.2375	174.367	200.131	131.709	134.502
AT1G01940	176.984	-0.0530298	0.356214	-0.14887	0.881656	0.957106	151.141	225.54	163.321	180.988	146.98	193.933
AT1G01950	731.953	0.773996	0.2457	3.15017	0.00163177	0.0170192	563.09	553.425	505.744	670.005	1172.02	927.438
AT1G01960	151.716	0.0593811	0.400784	0.148162	0.882215	0.957357	199.647	104.873	141.23	184.469	156.524	123.554
AT1G01970	136.2	-0.0203073	0.429382	-0.0472942	0.962279	0.985679	93.4968	138.988	179.89	125.3	179.43	100.094
AT1G01980	3.98922	0.175873	2.60505	0.0675121	0.946174	0.980065	11.2477	0	0	6.96109	5.72648	0
AT1G01990	340.854	-0.0346584	0.283548	-0.122231	0.902716	0.964675	333.214	291.243	409.487	379.38	276.78	355.023
AT1G02000	203.564	0.675899	0.349056	1.93636	0.0528234	0.201473	138.488	122.562	209.872	222.755	280.597	247.108
AT1G02010	287.919	0.0946326	0.345879	0.2736	0.784392	0.915183	404.215	201.533	228.808	358.496	235.74	298.719
AT1G02020	241.948	0.300534	0.389664	0.771265	0.44055	0.698847	184.885	153.519	311.652	238.417	178.475	384.738
AT1G02030	8.75197	-5.13193	1.95163	-2.62956	0.00854957	0.0582703	36.5551	12.6353	2.36698	0	0.954413	0
AT1G02040	0	NA	NA	NA	NA	NA	0	0	0	0	0	0
AT1G02050	56.4099	0.515199	0.597199	0.862692	0.388307	0.655416	52.7238	36.0105	50.4955	46.9874	50.5839	101.658
AT1G02060	17.9325	-1.32725	1.3442	-0.987391	0.323451	0.592497	25.3074	13.267	37.8716	29.5847	0	1.56398
AT1G02065	6.52035	-5.69112	2.28611	-2.48943	0.0127947	0.0775768	4.2179	34.1152	0.788993	0	0	0
AT1G02070	2.34328	-4.21223	3.83441	-1.09853	0.271972	NA	14.0597	0	0	0	0	0
AT1G02074	0	NA	NA	NA	NA	NA	0	0	0	0	0	0
AT1G02080	339.15	0.938681	0.314831	2.98154	0.002868	0.0258448	312.125	190.793	195.67	355.016	562.149	419.146
AT1G02090	588.151	0.403291	0.251806	1.6016	0.109245	0.318709	572.229	542.685	403.964	577.771	612.733	819.524
AT1G02100	2111.79	0.734191	0.182435	4.02441	5.71e-05	0.00117178	1542.35	1558.56	1658.46	2439.86	3133.34	2338.14
AT1G02110	225.574	0.445262	0.320936	1.38738	0.165325	0.405763	204.568	197.11	172	266.262	310.184	203.317
AT1G02120	1235.11	0.172226	0.226751	0.759538	0.447531	0.703582	1402.45	982.392	1097.49	1557.54	1011.68	1359.1
AT1G02130	817.026	0.0768202	0.260346	0.295069	0.767941	0.907672	750.083	862.989	770.057	1136.4	563.104	819.524
AT1G02136	2.76147	-4.44649	3.61864	-1.22877	0.219157	NA	0	0	16.5688	0	0	0
AT1G02140	1963.8	-0.358179	0.204961	-1.74755	0.0805423	0.264351	1875.56	2799.98	1941.71	1898.64	1570.01	1696.91
AT1G02145	989.125	0.611721	0.191991	3.18619	0.00144158	0.0155505	842.174	739.795	765.323	1150.32	1145.3	1291.84
AT1G02150	743.665	0.361236	0.237509	1.52093	0.128277	0.350973	518.099	792.231	641.451	889.28	709.129	911.798
AT1G02160	413.113	0.178402	0.286687	0.622288	0.533753	0.770037	494.9	294.402	374.771	393.302	528.745	392.558
AT1G02170	1003.87	0.403197	0.224436	1.79649	0.0724172	0.24731	728.994	834.56	1032	997.177	1381.04	1049.43
AT1G02180	26.6328	0.955037	1.1148	0.856693	0.391615	0.658569	25.3074	0	29.1927	29.5847	38.1765	37.5354
AT1G02190	11.2943	1.96277	1.30145	1.50814	0.131518	0.355636	3.51492	3.15882	7.10093	26.1041	2.86324	25.0236
AT1G02205	15.4549	-2.94279	1.40375	-2.09638	0.0360489	0.157069	37.2581	27.1658	17.3578	0	0	10.9478
AT1G02210	0.117164	0.00155855	4.08047	0.000381954	0.999695	NA	0.702983	0	0	0	0	0
AT1G02220	111.984	0.447854	0.436482	1.02605	0.304866	0.572336	106.151	73.9163	104.936	95.7151	166.068	125.118
AT1G02228.1	2.25245	-2.99929	3.59514	-0.834263	0.404133	NA	11.9507	0	0	0	0	1.56398
AT1G02230	2.27878	-1.77585	3.55711	-0.499239	0.617611	NA	10.5448	0	0	0	0	3.12795
AT1G02250	0	NA	NA	NA	NA	NA	0	0	0	0	0	0
AT1G02260	330.61	-0.218966	0.343925	-0.636668	0.524341	0.763757	487.871	213.536	366.882	264.522	386.537	264.312
AT1G02270	1149.91	-0.0447917	0.215154	-0.208184	0.835085	0.937787	959.572	1322.91	1221.36	938.008	1154.84	1302.79
AT1G02280	593.42	-0.370379	0.271576	-1.36381	0.172626	0.415757	444.286	858.567	704.57	487.277	510.611	555.212
AT1G02290	29.1372	-0.348553	0.90054	-0.387049	0.69872	0.872399	21.7925	31.5882	44.1836	17.4027	6.68089	53.1752
AT1G02300	2179.96	0.704771	0.18345	3.84176	0.000122158	0.00218433	1846.74	1488.43	1637.16	3127.27	2448.07	2532.08
AT1G02305	842.924	0.295991	0.215927	1.3708	0.170439	0.412526	744.459	840.877	683.268	955.41	777.846	1055.68
AT1G02310	25.8259	-0.273979	0.879815	-0.311406	0.755492	0.90185	16.8716	41.0646	26.8257	10.4416	19.0883	40.6634
AT1G02320	0.52647	-2.06771	3.96558	-0.521414	0.602078	NA	0	3.15882	0	0	0	0
AT1G02330	309.002	0.204755	0.32731	0.625569	0.531598	0.768694	251.668	278.608	332.166	201.872	384.628	405.07
AT1G02335	4.81244	3.76216	2.23132	1.68606	0.0917833	0.286242	0.702983	1.26353	0	0	19.0883	7.81988
AT1G02340	634.43	-1.77008	0.249486	-7.09492	1.29e-12	2.74e-10	1032.68	1029.14	879.727	266.262	228.105	370.662
AT1G02350	224.022	-0.0612952	0.377897	-0.162201	0.871148	0.95291	151.141	336.73	198.826	224.495	262.464	170.473
AT1G02360	29.1269	-1.73083	0.826028	-2.09537	0.0361385	0.157292	46.3969	53.6999	34.7157	5.22082	19.0883	15.6398
AT1G02370	18.5322	-0.880732	1.16531	-0.755792	0.449774	0.705537	2.81193	10.1082	59.1744	10.4416	11.453	17.2037
AT1G02380	181.591	-0.382321	0.452546	-0.844821	0.398211	0.66487	250.965	140.883	223.285	271.483	88.7604	114.17
AT1G02390	750.69	-2.07454	0.223775	-9.27065	1.85e-20	1.8e-17	1425.65	1031.67	1182.7	299.327	291.096	273.696
AT1G02391	0	NA	NA	NA	NA	NA	0	0	0	0	0	0
AT1G02400	1666.66	-0.756601	0.261218	-2.89643	0.00377431	0.0319076	1718.09	2915.59	1649.78	857.955	1447.84	1410.71
AT1G02405	10.6145	-3.16976	1.51649	-2.0902	0.0365996	0.158541	22.4955	7.58116	26.8257	5.22082	0	1.56398
AT1G02410	880.882	0.542027	0.207747	2.60907	0.00907878	0.0609639	691.033	623.551	837.91	1002.4	1040.31	1090.09
AT1G02420	14.3535	2.23085	1.23434	1.80732	0.0707122	0.243854	1.40597	8.84469	4.73396	52.2082	9.54413	9.38386
AT1G02430	42.5739	0.18202	0.698561	0.260565	0.794428	0.919817	22.4955	38.5376	59.1744	33.0652	67.7633	34.4075
AT1G02440	3.11918	-0.375541	2.32999	-0.161177	0.871954	0.953256	2.81193	6.9494	0.788993	0	1.90883	6.25591
AT1G02450	0.234328	-0.89133	4.03841	-0.220713	0.825316	NA	1.40597	0	0	0	0	0
AT1G02460	0.351492	-1.47598	3.99506	-0.369453	0.71179	NA	2.10895	0	0	0	0	0
AT1G02470	110.949	-0.973014	0.480144	-2.02651	0.0427129	0.174936	186.994	171.208	83.6332	62.6499	100.213	60.9951
AT1G02475	1402.42	0.0338708	0.177895	0.190398	0.848997	0.943494	1287.87	1422.1	1448.59	1320.87	1460.25	1474.83
AT1G02480	0	NA	NA	NA	NA	NA	0	0	0	0	0	0
AT1G02490	0	NA	NA	NA	NA	NA	0	0	0	0	0	0
AT1G02500	3501.11	0.0276711	0.17183	0.161038	0.872064	0.953256	3196.47	3701.5	3502.34	4093.12	3142.88	3370.37
AT1G02510	2.48518	0.831151	2.81682	0.295067	0.767943	NA	1.40597	0	3.94496	1.74027	0	7.81988
AT1G02520	0.640824	-0.599382	3.98656	-0.150351	0.880488	NA	0.702983	0	1.57799	0	0	1.56398
AT1G02530	0	NA	NA	NA	NA	NA	0	0	0	0	0	0
AT1G02540	0	NA	NA	NA	NA	NA	0	0	0	0	0	0
AT1G02550	0	NA	NA	NA	NA	NA	0	0	0	0	0	0
AT1G02560	1620.89	0.373166	0.193345	1.93005	0.0536003	0.203473	1146.57	1530.13	1559.84	1846.43	1687.4	1954.97
AT1G02570	0	NA	NA	NA	NA	NA	0	0	0	0	0	0
AT1G02575	1.75746	-3.79724	3.9246	-0.967547	0.333271	NA	10.5448	0	0	0	0	0
AT1G02580	2.86324	5.47905	3.50946	1.56122	0.118471	0.334701	0	0	0	0	17.1794	0
AT1G02590	10.7763	0.363328	1.36065	0.267026	0.789449	0.917891	2.10895	22.1117	3.94496	6.96109	7.6353	21.8957
AT1G02600	0	NA	NA	NA	NA	NA	0	0	0	0	0	0
AT1G02610	4880.85	-0.221283	0.175097	-1.26377	0.206312	0.462096	5125.45	5791.38	4849.15	3771.17	5196.78	4551.17
AT1G02620	1095.42	2.1166	0.340296	6.21987	4.98e-10	5.04e-08	180.667	396.116	654.864	2090.07	1298.96	1951.84
AT1G02630	0	NA	NA	NA	NA	NA	0	0	0	0	0	0
AT1G02640	335.96	-0.207052	0.329067	-0.629208	0.529213	0.767089	225.658	502.252	352.68	288.885	356.95	289.336
AT1G02650	37.4733	0.210745	0.742897	0.28368	0.776656	0.911455	55.5357	21.48	26.8257	57.429	22.9059	40.6634
AT1G02660	3170.6	0.0922184	0.185829	0.496254	0.619715	0.826723	2883.64	3350.24	2971.35	3376.13	2619.86	3822.36
AT1G02670	61.5999	1.63652	0.627325	2.60872	0.00908819	0.0610071	21.0895	33.4835	35.5047	38.286	97.3501	143.886
AT1G02680	973.758	0.12991	0.190466	0.682065	0.495198	0.741234	913.176	965.335	911.286	950.189	1003.09	1099.48
AT1G02681	2.94707	-2.07652	3.26071	-0.636832	0.524234	0.763671	0	0	14.2019	3.48055	0	0
AT1G02690	17.9736	-0.43755	1.47894	-0.295853	NA	NA	1.40597	60.6493	0	19.143	21.9515	4.69193
AT1G02700	4.9325	0.164992	2.45633	0.06717	0.946446	0.980198	14.0597	0	0	0	12.4074	3.12795
AT1G02710	8.16057	1.63229	1.82534	0.894239	0.371194	0.640563	11.9507	0	0	13.9222	15.2706	7.81988
AT1G02720	41.5543	0.810518	0.698352	1.16061	0.245799	0.509463	15.4656	44.8552	29.9817	50.4679	38.1765	70.3789
AT1G02730	37.7086	-5.12296	2.52678	-2.02747	0.0426148	0.174779	0	181.948	37.8716	1.74027	0	4.69193
AT1G02740	152.963	0.251322	0.437324	0.574681	0.565507	0.792375	192.617	103.609	123.872	97.4553	232.877	167.345
AT1G02750	302.752	-0.00129746	0.3041	-0.00426655	0.996596	0.999021	263.619	323.463	321.909	222.755	301.594	383.174
AT1G02760	0	NA	NA	NA	NA	NA	0	0	0	0	0	0
AT1G02770	20.535	0.401859	1.26044	0.318825	0.749859	0.898938	18.2776	34.747	0	6.96109	20.9971	42.2274
AT1G02780	2589.22	0.134799	0.198261	0.679903	0.496566	0.741969	2068.18	2789.87	2544.5	3259.53	2245.73	2627.48
AT1G02790	1.11454	-1.1408	3.92518	-0.290637	0.771329	NA	3.51492	1.26353	0	0	1.90883	0
AT1G02800	0.117164	0.00155855	4.08047	0.000381954	0.999695	NA	0.702983	0	0	0	0	0
AT1G02810	3.18138	5.63079	3.37879	1.66651	0.0956118	0.293311	0	0	0	0	19.0883	0
AT1G02813	0	NA	NA	NA	NA	NA	0	0	0	0	0	0
AT1G02816	560.975	-0.290422	0.282846	-1.02678	0.304522	0.572314	381.017	746.744	724.295	476.835	523.973	512.984
AT1G02820	290.05	-1.61276	0.335447	-4.80779	1.53e-06	5.41e-05	560.981	364.528	388.184	121.819	193.746	111.042
AT1G02830	0	NA	NA	NA	NA	NA	0	0	0	0	0	0
AT1G02840	2458.94	0.764313	0.181872	4.20248	2.64e-05	0.000610082	2153.24	1576.88	1738.15	2948.02	3342.35	2995.01
AT1G02850	2011.88	0.802566	0.231801	3.4623	0.000535576	0.00712037	1801.04	1286.27	1313.67	2232.77	3421.57	2015.97
AT1G02860	679.838	-0.574841	0.221537	-2.59479	0.00946486	0.0626787	837.956	787.177	815.818	459.432	542.106	636.538
AT1G02870	65.1587	-0.930322	1.69944	-0.54743	0.584084	0.8048	108.962	118.772	28.4037	95.7151	0	39.0994
AT1G02880	1307.43	0.969249	0.21622	4.48271	7.37e-06	0.000208134	807.025	776.437	1069.87	1393.96	1821.97	1975.3
AT1G02890	327.51	0.0924453	0.359433	0.257198	0.797026	0.920595	482.95	230.594	238.276	229.716	389.4	394.122
AT1G02900	55.1702	0.186308	0.649099	0.287025	0.774093	0.910285	86.467	27.7976	41.0276	50.4679	83.0339	42.2274
AT1G02910	1105.03	0.322046	0.202334	1.59165	0.111462	0.322583	1014.41	959.017	975.195	1012.84	1431.62	1237.11
AT1G02920	1712.77	-1.46929	0.226203	-6.49544	8.28e-11	1.02e-08	3193.65	2259.82	2097.93	699.59	966.82	1058.81
AT1G02930	2594.74	-0.438004	0.188597	-2.32243	0.0202097	0.106336	3099.45	2916.85	2943.73	1724.61	2576.91	2306.87
AT1G02940	7.77422	1.35973	2.16434	0.628242	0.529845	0.767479	1.40597	0	11.8349	0	33.4044	0
AT1G02950	0.159069	1.91537	4.07908	0.469558	0.638671	NA	0	0	0	0	0.954413	0
AT1G02952	0	NA	NA	NA	NA	NA	0	0	0	0	0	0
AT1G02960	698.977	0.0191007	0.247825	0.0770736	0.938565	0.97796	890.68	549.002	644.607	616.057	795.98	697.533
AT1G02965	0.234328	-0.89133	4.03841	-0.220713	0.825316	NA	1.40597	0	0	0	0	0
AT1G02970	24.4391	-1.0691	1.26641	-0.844194	0.398561	0.66521	4.2179	54.3317	40.2386	40.0263	0	7.81988
AT1G02980	3.12527	-1.60227	3.17087	-0.505309	0.613342	0.822907	14.0597	0	0	0	0	4.69193
AT1G02990	184.918	0.618422	0.356049	1.7369	0.0824044	0.26822	138.488	121.93	176.734	241.898	170.84	259.62
AT1G03000	436.818	-0.135045	0.245169	-0.550826	0.581753	0.803419	476.623	421.386	474.974	368.938	467.662	411.326
AT1G03010	0	NA	NA	NA	NA	NA	0	0	0	0	0	0
AT1G03020	6.05856	0.600092	1.67618	0.358011	0.720335	0.8827	1.40597	8.21293	4.73396	15.6625	4.77206	1.56398
AT1G03022	0	NA	NA	NA	NA	NA	0	0	0	0	0	0
AT1G03030	521.248	0.607593	0.270651	2.24493	0.0247727	0.122187	477.326	281.767	480.496	683.928	634.684	569.287
AT1G03040	528.105	0.31787	0.275028	1.15577	0.247775	0.511589	356.413	451.711	602.001	537.745	498.203	722.557
AT1G03050	12.891	0.382832	1.40545	0.272392	0.785321	0.915537	7.02983	26.5341	0	12.1819	19.0883	12.5118
AT1G03055	227.334	-0.488042	0.312467	-1.5619	0.118311	0.334434	283.302	236.28	277.725	163.586	218.561	184.549
AT1G03060	151.306	0.370465	0.474727	0.780375	0.43517	0.695146	63.2685	227.435	104.936	151.404	157.478	203.317
AT1G03070	5.68184	-1.94142	2.12614	-0.913118	0.36118	0.631592	4.2179	22.7435	0	5.22082	1.90883	0
AT1G03080	970.317	1.12353	0.283238	3.96675	7.29e-05	0.0014234	728.291	526.259	577.543	770.941	1390.58	1828.29
AT1G03090	1517.51	0.67458	0.231794	2.91025	0.00361135	0.0308206	1016.51	967.862	1524.33	1454.87	2034.81	2106.68
AT1G03100	23.1882	1.18994	0.92443	1.28721	0.19802	0.451326	7.02983	20.2164	14.9909	24.3638	16.225	56.3031
AT1G03103	0.628824	-2.30896	3.95659	-0.583574	0.559507	NA	1.40597	0	2.36698	0	0	0
AT1G03106	5.01403	0.148584	2.13422	0.0696195	0.944497	0.979625	0	5.68587	8.67892	5.22082	10.4985	0
AT1G03110	93.4698	-0.923431	0.496161	-1.86115	0.0627227	0.22498	101.933	151.623	113.615	40.0263	58.2192	95.4026
AT1G03120	77.8067	-0.254786	0.478696	-0.53225	0.594553	0.811255	97.0117	80.234	76.5323	73.0915	64.9001	75.0709
AT1G03130	11350	-0.642002	0.161186	-3.983	6.81e-05	0.00135527	12702.9	15645.6	13156.5	8962.41	9696.83	7935.62
AT1G03140	399.754	0.0768843	0.270793	0.283923	0.776469	0.911342	317.046	396.747	453.671	353.276	396.081	481.705
AT1G03150	769.681	0.996658	0.240208	4.14914	3.34e-05	0.00074108	549.733	421.386	572.02	783.123	1172.02	1119.81
AT1G03160	781.157	0.448502	0.259343	1.72938	0.0837412	0.270626	548.327	623.551	808.717	1181.65	678.587	846.111
AT1G03170	18.5156	0.582443	1.13327	0.513947	0.607289	0.819048	4.92088	20.2164	19.7248	3.48055	48.6751	14.0758
AT1G03180	59.9607	-0.620025	0.566994	-1.09353	0.274161	0.54152	99.8237	56.2269	61.5414	53.9485	38.1765	50.0472
AT1G03190	214.669	-0.239309	0.347912	-0.687842	0.491552	0.738447	194.726	278.608	224.863	198.391	249.102	142.322
AT1G03200	2.03042	2.2598	3.28022	0.688916	0.490876	NA	2.10895	0	0	0	3.81765	6.25591
AT1G03210	341.952	0.15875	0.333149	0.476514	0.633708	0.835128	449.206	233.752	287.193	252.34	391.309	437.913
AT1G03220	8549.31	-1.21845	0.209074	-5.82783	5.62e-09	4.37e-07	12582	11520.8	11780.4	3635.43	6858.41	4918.71
AT1G03230	533.411	-0.468898	0.260518	-1.79987	0.0718811	0.246115	656.587	557.215	646.185	318.47	527.79	494.217
AT1G03240	0.377827	0.980902	4.07804	0.240533	0.809917	NA	0.702983	0	0	0	0	1.56398
AT1G03250	561.117	0.253509	0.23323	1.08695	0.277059	0.544438	466.078	528.786	539.671	657.823	509.656	664.69
AT1G03260	128.271	-0.415749	0.425431	-0.977242	0.328449	0.597965	95.6058	188.266	156.221	90.4942	115.484	123.554
AT1G03270	20.893	0.540272	1.18696	0.455172	0.648985	0.843941	7.73282	15.7941	27.6147	41.7666	32.45	0
AT1G03280	459.029	0.405317	0.245619	1.65018	0.0989055	0.299443	461.157	353.156	370.038	546.446	479.115	544.264
AT1G03290	520.64	0.262153	0.229241	1.14357	0.252803	0.517486	459.751	475.086	486.019	497.718	581.237	624.027
AT1G03300	63.0003	-0.0543583	0.66405	-0.0818587	0.934759	0.976545	32.3372	109.927	49.7065	106.157	43.903	35.9715
AT1G03310	66.0319	0.21676	0.621294	0.348884	0.727176	0.886367	65.3775	46.1187	71.0093	104.416	24.8147	84.4547
AT1G03320	0	NA	NA	NA	NA	NA	0	0	0	0	0	0
AT1G03330	261.155	-0.292454	0.343163	-0.852232	0.394085	0.661129	420.384	217.958	224.074	238.417	225.241	240.852
AT1G03340	107.726	0.576476	0.47427	1.2155	0.224175	0.483384	78.7341	72.6528	108.092	83.5331	107.849	195.497
AT1G03350	396.768	-0.807746	0.268487	-3.00851	0.00262532	0.0242421	470.999	420.754	624.093	278.444	306.366	279.952
AT1G03360	43.638	-1.2541	0.828763	-1.51321	0.130225	0.354034	54.8327	61.2811	68.6424	38.286	37.2221	1.56398
AT1G03365	363.005	0.445928	0.270024	1.65144	0.0986487	0.298893	319.857	247.02	355.836	414.185	448.574	392.558
AT1G03370	1133.32	0.0969472	0.220252	0.440166	0.659817	0.850448	1207.02	1149.18	931.011	897.981	1327.59	1287.15
AT1G03380	668.859	0.387635	0.222667	1.74088	0.0817054	0.26697	636.903	532.577	570.442	647.382	853.245	772.604
AT1G03390	10.1662	-0.438257	1.97794	-0.221573	0.824646	0.932704	0	21.48	13.4129	26.1041	0	0
AT1G03400	1219.51	0.8236	0.228001	3.61227	0.00030353	0.00449672	826.709	848.458	965.727	1371.34	1238.83	2066.01
AT1G03410	583.233	0.722115	0.246392	2.93076	0.00338138	0.0294074	469.593	364.528	487.597	763.98	830.339	583.363
AT1G03420.1	0.260663	1.94267	4.07804	0.476374	0.633808	NA	0	0	0	0	0	1.56398
AT1G03430	804.275	0.254715	0.254057	1.00259	0.316059	0.584764	880.838	504.147	816.607	730.915	956.322	936.822
AT1G03440	115.023	-1.16852	0.465576	-2.50985	0.0120784	0.0744288	123.022	131.407	224.074	73.0915	91.6236	46.9193
AT1G03445	15.3491	2.19827	1.29644	1.69562	0.0899582	0.282399	13.3567	0	3.15597	19.143	26.7236	29.7156
AT1G03457	61.5141	-0.466123	0.697443	-0.668331	0.503922	0.747414	115.992	18.9529	79.6882	48.7277	74.4442	31.2795
AT1G03470	64.0699	-1.32419	0.770275	-1.71911	0.0855941	0.273863	9.84177	156.046	108.881	38.286	40.0853	31.2795
AT1G03475	840.394	0.689898	0.220372	3.13061	0.00174446	0.0179114	567.308	708.207	652.497	1146.84	839.883	1127.63
AT1G03490	0.788993	-2.63453	3.94658	-0.667548	0.504422	NA	0	0	4.73396	0	0	0
AT1G03495	39.0693	0.143752	0.77291	0.185988	0.852454	0.944696	17.5746	45.487	48.9175	17.4027	70.6265	34.4075
AT1G03502	1.37248	-2.15494	3.86715	-0.557243	0.577362	NA	3.51492	0	3.15597	0	0	1.56398
AT1G03506	2.02262	0.322459	3.03682	0.106183	0.915437	NA	1.40597	0	3.94496	5.22082	0	1.56398
AT1G03510	16.0304	0.170635	1.23022	0.138702	0.889685	0.960222	7.73282	35.3788	2.36698	6.96109	34.3589	9.38386
AT1G03515	3.13947	4.59813	3.16249	1.45396	0.145957	0.377636	0.702983	0	0	0	18.1338	0
AT1G03520	597.846	0.18345	0.277465	0.661163	0.508508	0.75106	363.442	636.818	678.534	676.966	530.653	700.661
AT1G03530	83.4442	0.699065	0.490537	1.4251	0.154128	0.389679	73.8133	47.3823	70.2203	81.7929	133.618	93.8386
AT1G03540	18.5719	0.436346	1.08512	0.402117	0.687598	0.866003	28.1193	8.84469	10.2569	8.70137	8.58971	46.9193
AT1G03545	0	NA	NA	NA	NA	NA	0	0	0	0	0	0
AT1G03550	266.244	1.11987	0.326911	3.42561	0.000613419	0.00793878	214.41	127.616	160.954	372.419	287.278	434.785
AT1G03560	200.82	0.338543	0.382105	0.885995	0.37562	0.644415	132.161	175.63	223.285	280.184	140.299	253.364
AT1G03570	0	NA	NA	NA	NA	NA	0	0	0	0	0	0
AT1G03580	561.982	0.804844	0.264381	3.04426	0.00233255	0.0223057	440.068	380.322	405.542	929.306	514.428	702.225
AT1G03590	326.218	-0.0124756	0.338598	-0.036845	0.970609	0.989004	432.335	332.939	216.973	268.002	269.144	437.913
AT1G03600	1625.25	-0.752202	0.189775	-3.96366	7.38e-05	0.0014373	1739.18	2381.12	1999.31	1176.43	1285.59	1169.85
AT1G03610	3566.22	-0.136131	0.162845	-0.835954	0.403181	0.6683	3537.41	3886.61	3779.27	3052.44	3361.44	3780.13
AT1G03620	42.7961	-0.220344	0.781894	-0.281808	0.778091	0.912199	72.4073	24.6388	41.8166	10.4416	66.8089	40.6634
AT1G03630	1127.4	-0.328991	0.210346	-1.56404	0.117807	0.333366	997.534	1321.65	1447.8	1019.8	1068.94	908.67
AT1G03640	0.262998	-1.03686	4.02598	-0.257542	0.79676	NA	0	0	1.57799	0	0	0
AT1G03650	47.1385	-0.314431	0.638685	-0.492311	0.6225	0.828401	68.8924	32.2199	56.0185	31.3249	50.5839	43.7913
AT1G03660	0	NA	NA	NA	NA	NA	0	0	0	0	0	0
AT1G03670	3.15197	-0.807755	3.15443	-0.25607	0.797897	0.920852	11.9507	0	0	6.96109	0	0
AT1G03680	3272.03	0.326966	0.217046	1.50644	0.131955	0.356277	2310	2945.91	3450.26	4477.72	2718.17	3730.08
AT1G03687	167.97	-0.0888402	0.341163	-0.260404	0.794552	0.919878	179.261	160.468	179.89	147.923	165.113	175.165
AT1G03700	1.04265	3.99744	3.96693	1.00769	0.313602	NA	0	0	0	0	0	6.25591
AT1G03710	4.88451	-0.0364393	2.72106	-0.0133916	0.989315	0.995885	0	0	14.9909	0	14.3162	0
AT1G03720	0	NA	NA	NA	NA	NA	0	0	0	0	0	0
AT1G03730	1188.26	-0.254746	0.201591	-1.26368	0.206346	0.462097	1235.84	1240.15	1405.2	899.721	1256.96	1091.66
AT1G03740	1227.96	0.759826	0.223314	3.4025	0.00066772	0.0085071	1095.95	697.467	942.846	1310.43	1553.78	1767.29
AT1G03743	14.6429	1.12172	1.30568	0.859111	0.390279	0.657065	11.9507	0	15.7799	19.143	19.0883	21.8957
AT1G03746	17.092	-1.38849	1.24315	-1.11691	0.264032	0.529719	19.6835	24.007	29.9817	22.6236	0	6.25591
AT1G03750	75.7643	0.846134	0.487326	1.73628	0.0825141	0.268364	47.0999	49.2776	66.2754	92.2345	101.168	98.5305
AT1G03760	21.9965	1.83582	0.908898	2.01983	0.043401	0.176413	4.2179	15.1623	9.46791	33.0652	37.2221	32.8435
AT1G03770	20.4011	0.734059	1.061	0.691853	0.489029	0.736677	10.5448	31.5882	3.94496	8.70137	41.0397	26.5876
AT1G03780	6.70438	-2.09627	1.78836	-1.17218	0.241126	0.503808	1.40597	23.3752	7.88993	0	2.86324	4.69193
AT1G03790	0.351492	-1.47598	3.99506	-0.369453	0.71179	NA	2.10895	0	0	0	0	0
AT1G03800	14.4279	2.68468	1.61572	1.66161	0.096592	0.295036	0	0	11.8349	5.22082	60.128	9.38386
AT1G03810	0	NA	NA	NA	NA	NA	0	0	0	0	0	0
AT1G03820	0.260663	1.94267	4.07804	0.476374	0.633808	NA	0	0	0	0	0	1.56398
AT1G03830	25.9343	-0.469476	0.942364	-0.49819	0.61835	0.825946	42.882	33.4835	13.4129	43.5068	6.68089	15.6398
AT1G03840	0	NA	NA	NA	NA	NA	0	0	0	0	0	0
AT1G03850	1124.4	-1.55859	0.239963	-6.49512	8.3e-11	1.02e-08	1311.06	1957.84	1764.19	687.408	423.759	602.131
AT1G03860	403.925	0.013493	0.273951	0.0492534	0.960717	0.985218	482.247	311.459	411.854	407.224	354.087	456.681
AT1G03870	889.356	-0.0778551	0.300578	-0.259018	0.795622	0.920017	863.264	767.593	1106.96	1353.93	564.058	680.33
AT1G03880	0	NA	NA	NA	NA	NA	0	0	0	0	0	0
AT1G03890	0	NA	NA	NA	NA	NA	0	0	0	0	0	0
AT1G03900	277.126	-0.153241	0.323461	-0.473755	0.635675	0.836158	342.353	209.745	324.276	273.223	308.275	204.881
AT1G03905	80.3767	0.104476	0.501493	0.20833	0.834971	0.937762	91.3879	48.6458	92.3121	92.2345	76.353	81.3268
AT1G03910	625.925	0.467331	0.223624	2.08981	0.036635	0.15861	463.266	510.465	602.79	682.187	714.855	781.988
AT1G03920	3.76276	-2.54763	2.39137	-1.06535	0.286719	0.555163	7.73282	1.89529	9.46791	3.48055	0	0
AT1G03930	327.315	0.192791	0.276985	0.696032	0.486409	0.734661	352.898	284.925	279.303	346.314	397.036	303.411
AT1G03935	4.08127	0.270561	2.30133	0.117567	0.906411	0.966123	0	2.52705	8.67892	0	8.58971	4.69193
AT1G03940	20.2989	1.90124	0.904298	2.10245	0.0355137	0.155583	9.84177	5.68587	10.2569	31.3249	33.4044	31.2795
AT1G03950	232.964	0.0601663	0.349233	0.172282	0.863216	0.949697	222.143	288.084	175.156	193.17	315.911	203.317
AT1G03960	324.756	0.120521	0.312543	0.385614	0.699782	0.872906	424.602	279.239	230.386	308.028	390.355	315.923
AT1G03970	27.7818	1.51615	0.794187	1.90906	0.0562547	0.209525	16.1686	8.21293	18.9358	40.0263	45.8118	37.5354
AT1G03980	15.8137	1.44667	1.50804	0.959303	0.337406	0.607622	0.702983	24.6388	0	43.5068	22.9059	3.12795
AT1G03982	18.3114	-0.92249	1.18747	-0.776851	0.437247	0.696575	6.32685	51.1728	14.2019	26.1041	10.4985	1.56398
AT1G03990	70.0611	0.199149	0.599297	0.332305	0.739659	0.892975	63.9715	74.5481	56.8075	43.5068	43.903	137.63
AT1G04000	499.731	-0.273649	0.35776	-0.764894	0.444335	0.701285	270.649	634.291	734.552	567.329	291.096	500.472
AT1G04010	52.6712	0.490065	0.636592	0.769825	0.441404	0.699211	37.9611	67.5987	26.0368	59.1693	83.0339	42.2274
AT1G04020	31.9729	0.52015	0.753656	0.690168	0.490088	0.737419	16.1686	37.274	25.2478	48.7277	36.2677	28.1516
AT1G04030	11.4673	2.10088	1.2192	1.72316	0.0848598	0.272615	4.92088	1.89529	6.31194	13.9222	27.678	14.0758
AT1G04040	123.806	0.271871	0.453595	0.599369	0.548927	0.781077	112.477	96.6598	127.028	205.352	123.119	78.1988
AT1G04050	107.979	-1.26643	0.561954	-2.25362	0.0242202	0.120565	261.51	55.5952	141.23	45.2471	80.1707	64.123
AT1G04070	109.966	-0.753586	0.487917	-1.5445	0.122468	0.34092	89.2789	202.796	121.505	114.858	73.4898	57.8671
AT1G04080	2614.14	0.614252	0.167224	3.67323	0.000239501	0.00374031	2168.7	1868.76	2159.47	3214.29	2898.55	3375.06
AT1G04090	5.89624	1.18559	1.84552	0.642414	0.520605	0.760315	0	3.79058	7.10093	1.74027	13.3618	9.38386
AT1G04100	155.711	0.29386	0.372868	0.788108	0.430634	0.691249	165.201	111.822	142.808	144.443	165.113	204.881
AT1G04110	3.1516	-0.421438	2.55323	-0.165061	0.868896	0.952149	0	7.58116	3.15597	3.48055	0	4.69193
AT1G04120	104.774	-0.682862	0.439935	-1.55219	0.120617	0.338243	132.864	141.515	113.615	80.0526	101.168	59.4311
AT1G04130	195.117	-0.484441	0.429508	-1.1279	0.259363	0.524051	165.904	293.138	222.496	139.222	88.7604	261.184
AT1G04140	703.62	-0.00886159	0.224115	-0.0395404	0.96846	0.987992	783.827	623.551	711.671	602.135	804.57	695.969
AT1G04150	0	NA	NA	NA	NA	NA	0	0	0	0	0	0
AT1G04160	37.2281	-0.598582	0.77884	-0.768556	0.442157	0.699511	56.9417	41.6964	36.2937	34.8055	45.8118	7.81988
AT1G04170	298.966	-0.623013	0.327313	-1.90341	0.0569866	0.211405	348.68	401.802	336.111	189.69	176.566	340.947
AT1G04171	0.260663	1.94267	4.07804	0.476374	0.633808	NA	0	0	0	0	0	1.56398
AT1G04180	0	NA	NA	NA	NA	NA	0	0	0	0	0	0
AT1G04190	317.597	0.391026	0.280771	1.39269	0.163715	0.403414	254.48	293.77	276.147	302.808	343.589	434.785
AT1G04200	299.724	0.602695	0.331546	1.81783	0.0690901	0.240202	195.429	301.983	217.762	261.041	490.568	331.563
AT1G04210	442.714	0.209817	0.267957	0.783024	0.433613	0.693794	411.245	336.73	485.23	382.86	550.696	489.525
AT1G04220	49.6746	-3.23609	0.78853	-4.10395	4.06e-05	0.000881342	111.071	85.2881	73.3763	0	9.54413	18.7677
AT1G04230	175.824	0.475104	0.361566	1.31402	0.18884	0.438906	160.28	104.873	176.734	203.612	223.333	186.113
AT1G04240	612.249	-0.620568	0.254561	-2.4378	0.014777	0.0855612	695.251	601.439	928.644	574.29	460.981	412.89
AT1G04250	838.657	-0.910539	0.232474	-3.91674	8.98e-05	0.001689	1332.86	881.31	1072.24	497.718	656.636	591.183
AT1G04260	214.863	-0.0398569	0.428377	-0.0930415	0.925871	0.972715	97.7147	228.698	327.432	241.898	238.603	154.834
AT1G04270	649.395	0.179484	0.213587	0.840333	0.400722	0.666423	672.755	602.071	552.295	694.369	697.676	677.202
AT1G04280	1302.69	-0.761698	0.191636	-3.97471	7.05e-05	0.00138987	1853.06	1629.32	1432.81	1044.16	915.282	941.514
AT1G04290	37.3743	-0.584046	0.716989	-0.814582	0.415312	0.679269	52.7238	44.8552	37.0827	38.286	37.2221	14.0758
AT1G04295	0	NA	NA	NA	NA	NA	0	0	0	0	0	0
AT1G04300	872.044	0.59252	0.220223	2.69054	0.00713367	0.0509256	627.061	703.153	757.433	826.63	1165.34	1152.65
AT1G04310	20.053	0.137556	0.978575	0.140567	0.888212	0.959441	27.4164	20.8482	8.67892	31.3249	8.58971	23.4596
AT1G04320	0	NA	NA	NA	NA	NA	0	0	0	0	0	0
AT1G04330	0.702983	-2.4756	3.95119	-0.626545	0.530957	NA	4.2179	0	0	0	0	0
AT1G04340	264.477	-0.322259	0.442235	-0.728707	0.466181	0.7183	266.431	349.997	267.468	160.105	438.075	104.786
AT1G04350	1967.79	0.285697	0.181269	1.57609	0.115004	0.328312	1772.92	1722.82	1826.52	2227.55	2444.25	1812.65
AT1G04360	93.1642	-2.55971	0.572192	-4.47352	7.69e-06	0.000216188	127.943	229.962	119.138	19.143	14.3162	48.4833
AT1G04370	0	NA	NA	NA	NA	NA	0	0	0	0	0	0
AT1G04380	8.42332	2.63292	1.80621	1.45771	0.144921	0.376386	7.02983	0	0	3.48055	18.1338	21.8957
AT1G04390	160.694	0.228918	0.474604	0.482334	0.629568	0.832206	229.876	85.2881	127.817	229.716	89.7148	201.753
AT1G04400	1169.22	0.0408433	0.19415	0.21037	0.833379	0.937403	1115.63	1070.21	1271.86	1331.31	1164.38	1061.94
AT1G04410	4513.11	0.151416	0.172869	0.875901	0.381084	0.649219	3775.72	4887.32	4164.3	5326.98	4265.27	4659.09
AT1G04420	747.035	0.458683	0.260041	1.76389	0.0777508	0.259178	452.721	789.704	644.607	1054.61	822.704	717.865
AT1G04425	1.04265	3.99744	3.96693	1.00769	0.313602	NA	0	0	0	0	0	6.25591
AT1G04430	769.544	-0.644677	0.208114	-3.09771	0.00195022	0.0195251	896.304	924.27	996.498	617.797	653.773	528.624
AT1G04440	1966.59	0.428245	0.185241	2.31182	0.0207874	0.108531	1822.84	1525.08	1684.5	1900.38	2530.15	2336.58
AT1G04445	10.3911	1.19679	1.33044	0.899542	0.368364	0.637683	8.4358	5.05411	5.52295	1.74027	18.1338	23.4596
AT1G04450	7.60561	-3.31085	1.7809	-1.85908	0.0630151	0.225594	28.1193	0.631763	12.6239	1.74027	0.954413	1.56398
AT1G04457	0.318138	2.47973	4.06038	0.610715	0.541388	NA	0	0	0	0	1.90883	0
AT1G04470	1.82464	4.80888	3.94121	1.22016	0.222406	NA	0	0	0	0	0	10.9478
AT1G04480	555.069	-0.414932	0.302623	-1.37112	0.170337	0.412378	719.152	687.99	498.643	339.353	700.539	384.738
AT1G04490	4.54012	-2.95325	2.07404	-1.42391	0.154472	0.390146	5.62387	8.84469	9.46791	1.74027	0	1.56398
AT1G04500	0.351492	-1.47598	3.99506	-0.369453	0.71179	NA	2.10895	0	0	0	0	0
AT1G04501	0	NA	NA	NA	NA	NA	0	0	0	0	0	0
AT1G04510	269.356	0.943206	0.322529	2.92441	0.00345111	0.0298404	194.023	214.168	143.597	415.925	260.555	387.866
AT1G04520	25.395	0.409026	1.11151	0.36799	0.712881	0.879937	46.3969	1.26353	18.1468	8.70137	54.4015	23.4596
AT1G04530	1013.53	-0.243736	0.241914	-1.00753	0.31368	0.582109	965.196	1210.46	1123.53	633.46	1131.93	1016.58
AT1G04540	10.283	-0.959898	1.74408	-0.550375	0.582063	0.803731	0.702983	0	40.2386	5.22082	12.4074	3.12795
AT1G04550	283.145	-0.0818218	0.290473	-0.281685	0.778185	0.912213	278.381	318.409	277.725	226.236	319.728	278.388
AT1G04555	158.972	-0.455014	0.379698	-1.19836	0.230778	0.491154	163.092	177.526	212.239	106.157	177.521	117.298
AT1G04560	0.315882	-1.33652	4.0039	-0.333803	0.738528	NA	0	1.89529	0	0	0	0
AT1G04570	9.99383	1.80647	1.95649	0.923323	0.355839	0.626705	0	0	13.4129	0	15.2706	31.2795
AT1G04580	1.58173	3.50594	3.95032	0.887507	0.374806	NA	0	0	0.788993	8.70137	0	0
AT1G04590	195.487	0.120879	0.440153	0.274628	0.783602	0.914574	244.638	231.225	85.2112	189.69	142.208	279.952
AT1G04600	2.40062	-4.2464	3.39708	-1.25001	0.211294	NA	11.2477	0	3.15597	0	0	0
AT1G04610	5.99098	1.39547	2.56892	0.543215	0.586982	0.807181	9.84177	0	0	26.1041	0	0
AT1G04620	23.0622	0.481792	0.979985	0.491632	0.62298	0.828401	33.7432	20.8482	3.15597	27.8444	32.45	20.3317
AT1G04625	0.117164	0.00155855	4.08047	0.000381954	0.999695	NA	0.702983	0	0	0	0	0
AT1G04630	305.787	-0.192638	0.302396	-0.637041	0.524098	0.763671	230.579	382.849	365.304	268.002	293.959	294.028
AT1G04635	2.03032	4.95746	3.93786	1.25892	0.208058	NA	0	0	0	12.1819	0	0
AT1G04640	350.316	-0.32695	0.313365	-1.04335	0.296785	0.564615	283.302	504.147	383.45	262.781	396.081	272.132
AT1G04645	1.44649	-3.51215	3.92849	-0.894022	0.37131	NA	0	0	8.67892	0	0	0
AT1G04650	64.8299	0.387309	0.58095	0.666681	0.504976	0.748272	71.7043	37.274	59.1744	73.0915	42.9486	104.786
AT1G04660	0.234328	-0.89133	4.03841	-0.220713	0.825316	NA	1.40597	0	0	0	0	0
AT1G04670	0	NA	NA	NA	NA	NA	0	0	0	0	0	0
AT1G04680	145.86	-1.66299	0.430742	-3.86077	0.000113031	0.00204978	150.438	325.99	189.358	64.3901	83.9883	60.9951
AT1G04684	0	NA	NA	NA	NA	NA	0	0	0	0	0	0
AT1G04690	732.029	-0.211757	0.240202	-0.881579	0.378004	0.646609	619.328	883.205	852.901	817.929	586.964	631.846
AT1G04700	4.8249	1.11175	2.18935	0.5078	0.611594	0.8218	2.81193	0	6.31194	10.4416	0	9.38386
AT1G04710	237.188	0.418861	0.350439	1.19525	0.23199	0.492867	179.964	147.201	281.67	266.262	224.287	323.743
AT1G04720	0	NA	NA	NA	NA	NA	0	0	0	0	0	0
AT1G04730	19.638	1.82663	1.0517	1.73684	0.0824149	0.26822	9.13879	5.05411	11.8349	5.22082	33.4044	53.1752
AT1G04750	713.607	0.344796	0.242922	1.41937	0.155792	0.392431	610.893	798.549	476.552	810.968	841.792	742.889
AT1G04760	54.4966	-1.31813	0.735199	-1.79289	0.07299	0.248501	113.883	53.6999	64.6974	62.6499	8.58971	23.4596
AT1G04770	2201.04	-1.29738	0.230947	-5.61764	1.94e-08	1.3e-06	3852.35	3160.08	2370.92	1456.61	930.552	1435.73
AT1G04778	0	NA	NA	NA	NA	NA	0	0	0	0	0	0
AT1G04780	680.646	0.536091	0.243402	2.20249	0.0276305	0.131201	646.745	518.678	501.01	682.187	718.673	1016.58
AT1G04790	307.969	-0.159965	0.290862	-0.54997	0.58234	0.803746	389.453	255.864	329.799	271.483	280.597	320.615
AT1G04800	4.18007	1.40736	2.5382	0.554471	0.579256	0.801872	0	3.79058	3.15597	0	18.1338	0
AT1G04810	407.316	-0.0726407	0.258437	-0.281077	0.778651	0.912314	357.819	436.549	457.616	391.562	348.361	451.989
AT1G04820	558.848	-0.561967	0.297059	-1.89177	0.0585213	0.215237	504.039	924.27	568.864	466.393	331.181	558.34
AT1G04830	560.848	-0.126618	0.235022	-0.538752	0.590058	0.809221	679.785	503.515	573.598	551.667	571.693	484.833
AT1G04840	16.006	-1.45e-05	1.11604	-1.3e-05	0.99999	0.99999	21.0895	2.52705	24.4588	13.9222	15.2706	18.7677
AT1G04850	790.59	-0.226044	0.246257	-0.917921	0.35866	0.629292	866.076	831.401	862.369	502.939	919.099	761.656
AT1G04860	264.381	-0.723564	0.294331	-2.45833	0.0139585	0.0821935	378.205	300.719	308.496	200.131	181.338	217.393
AT1G04870	155.827	-0.400491	0.356651	-1.12292	0.261471	0.527008	182.776	193.951	155.432	135.741	145.071	121.99
AT1G04880	5.71742	-0.0576616	2.07414	-0.0278002	0.977821	0.991281	4.2179	0	13.4129	5.22082	11.453	0
AT1G04890	0	NA	NA	NA	NA	NA	0	0	0	0	0	0
AT1G04900	31.2605	-0.164508	0.755771	-0.217669	0.827687	0.934594	32.3372	42.3282	24.4588	19.143	28.6324	40.6634
AT1G04910	249.323	-0.0866448	0.324233	-0.26723	0.789292	0.917816	189.103	331.044	250.111	226.236	236.694	262.748
AT1G04920	4.71488	-1.80602	2.07787	-0.869167	0.384756	0.652548	0.702983	10.1082	11.0459	1.74027	0	4.69193
AT1G04930	23.9533	0.748941	0.846032	0.88524	0.376027	0.644596	25.3074	15.7941	12.6239	20.8833	36.2677	32.8435
AT1G04940	108.578	-0.373553	0.46884	-0.796761	0.42559	0.687094	118.101	164.259	86.0002	87.0137	128.846	67.251
AT1G04945	26.3889	0.0247992	1.0364	0.0239282	0.98091	0.992594	10.5448	6.9494	60.7524	53.9485	10.4985	15.6398
AT1G04950	419.184	0.0442748	0.261814	0.169108	0.865712	0.950838	368.363	391.693	479.707	374.159	503.93	397.25
AT1G04960	1172.28	-0.0904391	0.247618	-0.365236	0.714935	0.880774	1369.41	1134.65	1125.1	725.694	1361.95	1316.87
AT1G04970	986.39	0.23242	0.22645	1.02636	0.30472	0.572336	814.758	820.029	1088.81	870.137	1279.87	1044.74
AT1G04980	130.957	-0.0771933	0.436951	-0.176663	0.859773	0.948386	202.459	104.241	96.2571	135.741	107.849	139.194
AT1G04985	987.668	0.0764514	0.20952	0.364888	0.715195	0.880861	940.592	1121.38	822.919	896.241	1064.17	1080.71
AT1G04990	168.336	-0.794472	0.376841	-2.10824	0.0350101	0.154382	274.867	162.363	204.349	107.897	147.934	112.606
AT1G05000	183.465	-0.129199	0.354112	-0.364854	0.715221	0.880861	186.994	192.056	197.248	128.78	225.241	170.473
AT1G05010	925.013	-0.328594	0.269313	-1.22012	0.22242	0.480826	1415.81	802.971	872.626	596.914	968.729	893.03
AT1G05020	56.2532	-1.07067	0.578417	-1.85103	0.0641655	0.228267	54.8327	94.1328	79.6882	31.3249	35.3133	42.2274
AT1G05030	179.357	0.695521	0.373223	1.86355	0.0623845	0.224277	171.528	120.035	119.138	172.287	197.563	295.592
AT1G05040	4.79983	2.68109	2.1632	1.23941	0.215195	0.473091	0	0	3.94496	12.1819	9.54413	3.12795
AT1G05055	178.32	-0.07861	0.525229	-0.149668	0.881027	0.956807	48.5059	174.998	325.854	214.054	146.98	159.526
AT1G05060	146.423	-0.751178	0.383302	-1.95975	0.0500245	0.194162	222.143	140.251	188.569	104.416	101.168	121.99
AT1G05061	0.290046	1.94267	4.07804	0.476374	0.633808	NA	0	0	0	1.74027	0	0
AT1G05065	3.78569	-0.667079	2.39278	-0.278788	0.780408	0.912928	0.702983	9.47645	3.94496	0	8.58971	0
AT1G05070	266.608	0.062204	0.328412	0.189408	0.849773	0.943815	186.994	272.29	323.487	314.99	289.187	212.701
AT1G05080	0	NA	NA	NA	NA	NA	0	0	0	0	0	0
AT1G05085	3.08927	-4.61059	3.12179	-1.47691	0.1397	0.368495	16.1686	0	2.36698	0	0	0
AT1G05090	37.4699	0.174908	0.728689	0.240031	0.810306	0.926696	30.9313	28.4294	46.5506	17.4027	46.7662	54.7392
AT1G05100	303.205	-1.08972	0.446711	-2.43944	0.0147102	0.0852515	376.799	449.184	411.854	60.9096	167.022	353.459
AT1G05120	208.247	0.23053	0.3405	0.677035	0.498384	0.743075	189.103	199.637	186.202	167.066	211.88	295.592
AT1G05135	664.242	-1.77253	0.278334	-6.36836	1.91e-10	2.19e-08	986.989	1102.43	996.498	175.768	370.312	353.459
AT1G05136	0	NA	NA	NA	NA	NA	0	0	0	0	0	0
AT1G05140	426.265	-0.428407	0.302287	-1.41722	0.156418	0.393176	428.82	566.06	471.818	490.757	365.54	234.596
AT1G05150	143.455	-0.478429	0.377816	-1.2663	0.205405	0.461024	138.488	178.157	184.624	130.521	128.846	100.094
AT1G05160	265.855	0.765922	0.318373	2.40573	0.01614	0.0911586	141.3	225.54	223.285	384.6	287.278	333.127
AT1G05170	489.458	-0.287382	0.247635	-1.1605	0.245844	0.509483	605.269	507.306	500.221	450.731	366.494	506.728
AT1G05180	410.886	-0.126884	0.277036	-0.458005	0.646949	0.842598	414.76	520.573	352.68	325.431	473.389	378.482
AT1G05190	1479.34	-0.342579	0.193088	-1.77421	0.0760284	0.255265	1534.61	1912.98	1516.44	1171.2	1458.34	1282.46
AT1G05200	958.834	0.0171908	0.201432	0.0853429	0.931989	0.975412	963.79	888.891	1005.18	1023.28	825.567	1046.3
AT1G05205	108.206	-0.271934	0.453357	-0.599823	0.548624	0.780947	123.022	157.941	74.1653	97.4553	105.94	90.7106
AT1G05210	35.1471	0.0412479	0.858553	0.0480436	0.961682	0.985557	30.2283	58.1222	14.9909	50.4679	8.58971	48.4833
AT1G05220	7.44719	0.104006	1.75011	0.059428	0.952611	0.982526	16.1686	1.26353	3.94496	13.9222	0	9.38386
AT1G05230	125.649	-1.34768	0.48465	-2.78072	0.0054238	0.0418256	189.806	210.377	139.652	69.6109	33.4044	111.042
AT1G05240	3.92075	1.67144	2.36668	0.70624	0.480039	0.729486	5.62387	0	0	8.70137	7.6353	1.56398
AT1G05250	0	NA	NA	NA	NA	NA	0	0	0	0	0	0
AT1G05260	3.2474	-4.6806	2.78767	-1.67904	0.0931451	0.288641	0.702983	3.79058	14.9909	0	0	0
AT1G05270	502.434	0.239681	0.297699	0.805112	0.420755	0.683347	278.381	591.962	512.056	482.056	540.198	609.951
AT1G05280	0.351492	-1.47598	3.99506	-0.369453	0.71179	NA	2.10895	0	0	0	0	0
AT1G05290	6.17866	-3.5057	2.11127	-1.66047	0.09682	0.295424	15.4656	17.6894	0.788993	0	0	3.12795
AT1G05291	0	NA	NA	NA	NA	NA	0	0	0	0	0	0
AT1G05300	22.523	-0.531469	0.905775	-0.586756	0.557368	0.786461	42.179	24.007	13.4129	24.3638	12.4074	18.7677
AT1G05310	524.102	-1.51939	0.262747	-5.7827	7.35e-09	5.55e-07	856.937	680.409	791.36	346.314	209.971	259.62
AT1G05320	249.107	-2.79469	0.358539	-7.79466	6.46e-15	2.2e-12	518.802	509.833	277.725	57.429	62.0368	68.815
AT1G05330	90.5885	-1.25528	0.521545	-2.40684	0.0160912	0.0910131	172.231	120.667	89.1562	57.429	30.5412	73.5069
AT1G05340	2501.01	-1.60556	0.252703	-6.35353	2.1e-10	2.38e-08	4149.71	3615.58	3533.9	708.291	1664.5	1334.07
AT1G05350	504.843	0.283785	0.297359	0.954352	0.339906	0.610057	383.829	500.357	480.496	509.9	369.358	785.116
AT1G05360	274.619	-0.86109	0.402922	-2.13712	0.0325886	0.147147	484.356	297.561	283.248	106.157	316.865	159.526
AT1G05370	37.2856	0.35305	0.969163	0.364283	0.715646	0.880975	28.1193	22.7435	48.1285	12.1819	107.849	4.69193
AT1G05380	284.061	0.634077	0.386401	1.64098	0.100801	0.302834	236.202	123.826	307.707	288.885	251.965	495.78
AT1G05385	445.945	0.531795	0.318157	1.67149	0.0946255	0.291684	265.025	384.112	443.414	704.811	334.044	544.264
AT1G05390	0	NA	NA	NA	NA	NA	0	0	0	0	0	0
AT1G05400	2.06346	-4.02768	3.58632	-1.12307	0.261409	NA	8.4358	0	3.94496	0	0	0
AT1G05410	153.678	0.136812	0.428279	0.319446	0.749388	0.898676	114.586	202.796	120.716	234.937	114.53	134.502
AT1G05420	3.12566	0.707002	2.84523	0.248487	0.803758	0.923815	0	0	7.10093	6.96109	0	4.69193
AT1G05430	257.407	-0.417454	0.342334	-1.21944	0.222679	0.481175	340.947	294.402	246.166	240.158	141.253	281.516
AT1G05440	0	NA	NA	NA	NA	NA	0	0	0	0	0	0
AT1G05450	0	NA	NA	NA	NA	NA	0	0	0	0	0	0
AT1G05460	92.3977	-0.0142177	0.606572	-0.0234393	0.9813	0.992757	101.933	115.613	59.9634	120.079	23.8603	132.938
AT1G05470	20.7057	-2.18893	1.03245	-2.12014	0.0339943	0.151238	44.288	15.7941	41.8166	12.1819	8.58971	1.56398
AT1G05490	2.87196	2.16541	3.23129	0.670139	0.502769	0.746815	0	0	3.15597	0	0	14.0758
AT1G05500	471.431	0.355958	0.256065	1.39011	0.164496	0.404455	352.898	494.039	392.918	509.9	465.753	613.079
AT1G05510	7.39589	-0.525894	1.94417	-0.270498	0.786777	0.916296	11.2477	15.1623	0	1.74027	16.225	0
AT1G05520	190.224	0.392884	0.359561	1.09268	0.274536	0.541977	135.676	214.168	142.808	221.015	172.749	254.928
AT1G05530	0	NA	NA	NA	NA	NA	0	0	0	0	0	0
AT1G05540	57.3524	0.928954	0.626391	1.48303	0.138068	0.366023	45.6939	21.48	51.2845	57.429	52.4927	115.734
AT1G05550	4.22655	-0.970871	2.57785	-0.37662	0.706456	0.876541	14.7627	1.89529	0	8.70137	0	0
AT1G05560	41.8296	-0.284565	0.781062	-0.36433	0.715612	0.880975	26.0104	92.2375	19.7248	20.8833	46.7662	45.3553
AT1G05562	0.643159	-2.33984	3.95554	-0.591534	0.554162	NA	0.702983	0	3.15597	0	0	0
AT1G05570	128.928	1.32756	0.414384	3.2037	0.00135672	0.0148383	54.1297	68.8622	97.8351	180.988	213.788	157.962
AT1G05575	1628.25	-1.28669	0.243314	-5.28819	1.24e-07	6.42e-06	2688.91	2555.48	1688.44	767.461	1251.24	817.96
AT1G05577	14.9966	-0.513373	1.09674	-0.468088	0.639722	0.838108	11.2477	27.7976	14.2019	6.96109	21.9515	7.81988
AT1G05580	1.40597	-3.47536	3.92905	-0.88453	0.37641	NA	8.4358	0	0	0	0	0
AT1G05590	96.5698	0.385915	0.582652	0.662341	0.507752	0.750646	109.665	37.9058	103.358	186.209	90.6692	51.6112
AT1G05600	76.0156	0.210463	0.66385	0.317035	0.751217	0.899654	75.9222	119.403	15.7799	111.378	77.3074	56.3031
AT1G05610	1.48598	-3.55831	3.9278	-0.905929	0.364974	NA	0.702983	8.21293	0	0	0	0
AT1G05615	0	NA	NA	NA	NA	NA	0	0	0	0	0	0
AT1G05620	159.074	-1.17623	0.369627	-3.18222	0.0014615	0.0157158	234.796	173.103	253.267	107.897	86.8516	98.5305
AT1G05630	154.349	0.162565	0.427232	0.380507	0.703569	0.87496	190.509	130.143	115.193	240.158	103.077	147.014
AT1G05640	3.1714	0.631862	2.81138	0.224751	0.822173	0.931553	0	1.26353	6.31194	0	11.453	0
AT1G05650	0	NA	NA	NA	NA	NA	0	0	0	0	0	0
AT1G05660	0.702983	-2.4756	3.95119	-0.626545	0.530957	NA	4.2179	0	0	0	0	0
AT1G05670	308.41	0.0652995	0.272152	0.239938	0.810378	0.926696	318.452	270.395	315.597	292.366	311.139	342.511
AT1G05675	2006.24	-0.839466	0.228718	-3.6703	0.000242264	0.0037777	3346.2	1892.13	2486.12	1206.01	1693.13	1413.83
AT1G05680	67.629	-1.18826	0.657681	-1.80674	0.0708026	0.244018	79.4371	134.566	69.4313	20.8833	81.1251	20.3317
AT1G05690	167.444	1.04369	0.347754	3.00124	0.00268878	0.024642	111.774	98.5551	117.56	259.301	198.518	218.957
AT1G05700	3.53457	-1.84226	2.71371	-0.678874	0.497218	0.742352	13.3567	3.15882	0	0	0	4.69193
AT1G05710	244.397	0.925488	0.31455	2.94226	0.00325824	0.0285937	164.498	158.573	183.046	245.379	325.455	389.43
AT1G05720	239.367	0.104424	0.342807	0.304613	0.760661	0.903928	171.528	287.452	232.753	311.509	245.284	187.677
AT1G05730	1.99179	-3.97778	3.92251	-1.01409	0.310539	NA	11.9507	0	0	0	0	0
AT1G05740	0	NA	NA	NA	NA	NA	0	0	0	0	0	0
AT1G05750	31.082	0.957731	0.866146	1.10574	0.268839	0.534871	11.2477	39.1693	12.6239	74.8318	26.7236	21.8957
AT1G05760	0	NA	NA	NA	NA	NA	0	0	0	0	0	0
AT1G05770	0	NA	NA	NA	NA	NA	0	0	0	0	0	0
AT1G05780	148.752	-0.195272	0.373636	-0.522626	0.601235	0.815372	156.765	154.782	165.688	134.001	171.794	109.478
AT1G05785	307.712	0.199669	0.308819	0.646556	0.517919	0.758207	275.57	317.145	268.257	250.599	443.802	290.9
AT1G05790	373.481	0.339608	0.319514	1.06289	0.287832	0.556316	467.484	291.875	228.808	495.978	340.725	416.018
AT1G05800	0	NA	NA	NA	NA	NA	0	0	0	0	0	0
AT1G05805	744.193	0.467382	0.217231	2.15154	0.0314335	0.143556	617.922	636.818	618.57	797.045	762.576	1032.22
AT1G05810	43.2542	-0.569065	0.733338	-0.775993	0.437753	0.697095	54.8327	73.9163	26.8257	13.9222	52.4927	37.5354
AT1G05820	19.7509	-0.18209	0.923425	-0.19719	0.843679	0.94232	16.1686	18.3211	28.4037	15.6625	13.3618	26.5876
AT1G05830	988.02	0.554071	0.213063	2.60051	0.00930866	0.0620493	985.583	719.579	696.68	1112.03	1178.7	1235.54
AT1G05835	9.40831	-0.376827	1.56014	-0.241535	0.809141	0.926277	16.1686	0	15.7799	8.70137	9.54413	6.25591
AT1G05840	465.123	0.567973	0.295099	1.92469	0.0542687	0.2047	413.354	237.543	474.185	473.354	591.736	600.567
AT1G05850	1318.34	-0.315033	0.180699	-1.74341	0.0812617	0.266111	1460.1	1503.6	1422.55	1179.91	1274.14	1069.76
AT1G05860	350.54	0.695804	0.317259	2.19317	0.028295	0.133636	186.994	327.885	287.193	569.069	381.765	350.331
AT1G05870	435.027	-0.740464	0.283106	-2.6155	0.0089096	0.0600841	671.349	475.718	486.808	238.417	353.133	384.738
AT1G05880	0.117164	0.00155855	4.08047	0.000381954	0.999695	NA	0.702983	0	0	0	0	0
AT1G05890	897.542	0.763744	0.22863	3.34052	0.000836211	0.010203	821.788	557.847	615.414	1242.56	949.641	1198.01
AT1G05894	22.8159	1.49121	0.995082	1.49858	0.133982	0.359286	15.4656	13.8988	6.31194	73.0915	17.1794	10.9478
AT1G05900	885.679	0.274207	0.237075	1.15662	0.247427	0.511126	1033.39	670.933	699.836	1021.54	821.749	1066.63
AT1G05910	325.592	0.38991	0.291209	1.33893	0.180592	0.427421	288.926	283.662	273.78	264.522	409.443	433.221
AT1G05920	9.66898	-0.694639	1.3681	-0.507741	0.611635	0.821802	9.84177	2.52705	23.6698	5.22082	10.4985	6.25591
AT1G05925	0.315882	-1.33652	4.0039	-0.333803	0.738528	NA	0	1.89529	0	0	0	0
AT1G05930	1.53555	2.319	3.89875	0.594806	0.551973	NA	0	0	1.57799	0	7.6353	0
AT1G05940	692.067	0.629852	0.246639	2.55374	0.0106572	0.068165	677.676	496.566	454.46	938.008	678.587	907.106
AT1G05950	68.6693	0.0751366	0.526344	0.142752	0.886486	0.959146	54.1297	90.9739	55.2295	78.3123	62.9912	70.3789
AT1G05960	303.863	-0.0164631	0.33573	-0.0490366	0.96089	0.985218	300.877	395.484	220.129	224.495	278.689	403.506
AT1G05970	322.763	0.466071	0.366872	1.27039	0.203945	0.459202	144.112	344.311	324.276	502.939	337.862	283.08
AT1G05980	0	NA	NA	NA	NA	NA	0	0	0	0	0	0
AT1G05990	0	NA	NA	NA	NA	NA	0	0	0	0	0	0
AT1G06000	70.421	0.108731	0.613846	0.17713	0.859406	0.948134	68.8924	49.2776	86.0002	66.1304	124.074	28.1516
AT1G06002	0.394496	-1.62795	3.98632	-0.408383	0.682993	NA	0	0	2.36698	0	0	0
AT1G06010	61.188	-0.664787	0.725927	-0.915777	0.359784	0.630237	78.7341	101.082	45.7616	6.96109	61.0824	73.5069
AT1G06020	17.5642	0.061929	1.08381	0.05714	0.954434	0.983143	33.7432	9.47645	8.67892	6.96109	32.45	14.0758
AT1G06030	24.7767	-0.451656	0.890768	-0.507041	0.612126	0.822135	30.2283	16.4259	39.4496	26.1041	28.6324	7.81988
AT1G06040	3680.67	0.268888	0.183248	1.46735	0.142281	0.372515	3382.05	3081.11	3550.47	4877.99	3352.85	3839.56
AT1G06050	287.505	0.128744	0.335334	0.383926	0.701033	0.873529	229.173	228.067	368.46	240.158	397.99	261.184
AT1G06060	354.367	0.339557	0.281404	1.20665	0.227566	0.48714	262.916	364.528	310.863	339.353	368.403	480.141
AT1G06070	331.783	0.244509	0.309558	0.789865	0.429607	0.690676	215.816	363.896	330.588	448.991	309.23	322.179
AT1G06080	6.4139	-3.56667	2.07162	-1.72169	0.0851266	0.273008	1.40597	25.2705	8.67892	0	0	3.12795
AT1G06090	0	NA	NA	NA	NA	NA	0	0	0	0	0	0
AT1G06100	6.09255	0.658014	2.04371	0.321971	0.747475	0.897494	7.02983	0	7.10093	5.22082	0	17.2037
AT1G06110	740.853	-0.110344	0.215383	-0.512318	0.608429	0.819586	722.667	811.184	772.424	835.331	657.59	645.922
AT1G06120	0.40721	0.980902	4.07804	0.240533	0.809917	NA	0.702983	0	0	1.74027	0	0
AT1G06130	1714.1	0.587075	0.170703	3.43915	0.000583533	0.00762771	1385.58	1310.28	1413.87	2029.16	1932.69	2213.03
AT1G06135	20.1242	-3.41061	1.31328	-2.59701	0.00940401	0.0624858	26.7134	72.6528	11.8349	0	9.54413	0
AT1G06137	0	NA	NA	NA	NA	NA	0	0	0	0	0	0
AT1G06140	13.919	-0.912801	1.25071	-0.729824	0.465498	0.717828	39.3671	8.21293	7.10093	1.74027	11.453	15.6398
AT1G06148	23.643	0.185114	0.957318	0.193367	0.846671	0.942772	42.179	15.7941	8.67892	10.4416	38.1765	26.5876
AT1G06149	0	NA	NA	NA	NA	NA	0	0	0	0	0	0
AT1G06150	33.8644	-0.675826	0.995543	-0.678852	0.497232	0.742352	71.7043	46.1187	7.10093	3.48055	20.0427	54.7392
AT1G06160	436.741	-0.145906	0.374676	-0.389418	0.696967	0.871432	294.55	626.078	453.671	636.94	216.652	392.558
AT1G06170	2.10895	-4.06023	3.92163	-1.03534	0.300509	NA	12.6537	0	0	0	0	0
AT1G06180	44.7723	-1.0555	0.757909	-1.39265	0.163726	0.403414	59.0506	63.8081	57.5965	62.6499	11.453	14.0758
AT1G06190	548.576	0.471411	0.272189	1.73193	0.0832865	0.26994	373.987	485.826	519.157	810.968	643.274	458.245
AT1G06200	864.12	0.00634228	0.22042	0.0287736	0.977045	0.991052	913.176	987.446	686.424	776.162	919.099	902.414
AT1G06210	439.104	-0.433085	0.286873	-1.50968	0.131126	0.355116	643.23	370.845	501.01	309.769	443.802	365.97
AT1G06220	332.476	-0.300618	0.285587	-1.05263	0.29251	0.560387	369.769	282.398	448.937	304.548	292.05	297.156
AT1G06225	0	NA	NA	NA	NA	NA	0	0	0	0	0	0
AT1G06230	627.01	0.624207	0.256683	2.43182	0.0150231	0.0864607	546.218	410.014	523.102	750.058	575.511	957.154
AT1G06240	205.48	-0.123627	0.397386	-0.3111	0.755725	0.90185	123.022	261.55	257.212	254.08	138.39	198.625
AT1G06250	114.267	0.00081901	0.525105	0.00155971	0.998756	0.999537	128.646	171.84	41.8166	102.676	98.3045	142.322
AT1G06260	0	NA	NA	NA	NA	NA	0	0	0	0	0	0
AT1G06265	220.312	1.15014	0.353675	3.25197	0.0011461	0.0130302	183.479	90.3422	137.285	281.924	342.634	286.208
AT1G06270	32.5232	-0.718894	0.772557	-0.930538	0.352092	0.622324	54.1297	31.5882	36.2937	17.4027	40.0853	15.6398
AT1G06280	6.44248	-5.67175	2.44606	-2.31873	0.0204098	0.107064	32.3372	6.31763	0	0	0	0
AT1G06290	203.343	-0.241873	0.386307	-0.626116	0.531239	0.768502	227.767	249.547	185.413	111.378	273.916	172.037
AT1G06310	0	NA	NA	NA	NA	NA	0	0	0	0	0	0
AT1G06320	2.09713	-0.0273866	3.63045	-0.0075436	0.993981	NA	6.32685	0	0	0	0	6.25591
AT1G06330	0	NA	NA	NA	NA	NA	0	0	0	0	0	0
AT1G06340	12.6781	-4.63792	1.72616	-2.68685	0.00721296	0.0513128	59.0506	4.42234	9.46791	0	0	3.12795
AT1G06350	0	NA	NA	NA	NA	NA	0	0	0	0	0	0
AT1G06360	9.30875	-1.49599	2.05558	-0.727769	0.466755	0.718846	0	39.1693	2.36698	0	14.3162	0
AT1G06370	566.992	1.12699	0.231238	4.87372	1.1e-06	4.16e-05	305.095	387.271	375.56	781.383	703.402	849.239
AT1G06380	56.3675	-1.26211	0.622718	-2.02677	0.0426854	0.174889	87.17	60.6493	90.7341	19.143	25.7691	54.7392
AT1G06390	771.828	-0.0391896	0.208642	-0.187832	0.851009	0.944059	691.033	873.097	782.681	793.565	771.166	719.429
AT1G06400	1361.1	-0.250443	0.245009	-1.02218	0.306698	0.574609	1107.9	1883.29	1443.07	1423.54	915.282	1393.5
AT1G06410	2328.59	-0.379997	0.171937	-2.2101	0.0270984	0.12969	2305.08	2942.75	2652.59	1971.73	2022.4	2076.96
AT1G06420	88.6445	1.84233	0.545626	3.37654	0.00073404	0.00917505	30.9313	26.5341	58.3854	191.43	74.4442	150.142
AT1G06430	719.712	0.584135	0.231042	2.52826	0.0114628	0.0716174	511.772	648.821	565.708	931.046	688.132	972.793
AT1G06440	18.0944	-0.430911	1.28747	-0.334696	0.737855	0.892111	0.702983	27.7976	33.9267	22.6236	21.9515	1.56398
AT1G06450	81.448	-0.363053	0.52093	-0.696932	0.485845	0.734326	104.042	113.086	58.3854	62.6499	97.3501	53.1752
AT1G06460	798.416	-0.248816	0.211857	-1.17445	0.240215	0.502776	829.52	793.495	979.929	657.823	810.296	719.429
AT1G06470	361.653	0.423911	0.278558	1.52181	0.128058	0.350609	265.025	390.43	270.624	407.224	384.628	451.989
AT1G06475	9.31179	0.137503	1.4648	0.0938714	0.925211	0.972322	0.702983	16.4259	9.46791	3.48055	8.58971	17.2037
AT1G06480	0	NA	NA	NA	NA	NA	0	0	0	0	0	0
AT1G06490	9.87634	0.352618	1.70223	0.20715	0.835892	0.938271	24.6044	0	1.57799	1.74027	21.9515	9.38386
AT1G06500	116.463	0.548106	0.442186	1.23954	0.215146	0.473049	92.7938	128.88	61.5414	158.365	116.438	140.758
AT1G06510	295.549	-0.0087751	0.296103	-0.0296353	0.976358	0.990926	317.749	283.03	288.771	227.976	288.233	367.534
AT1G06515	690.506	0.235539	0.213719	1.1021	0.27042	0.536708	684.003	631.132	588.588	723.954	830.339	685.022
AT1G06520	3.20352	0.207247	2.36048	0.0877986	0.930037	0.974797	0.702983	1.26353	7.10093	0	8.58971	1.56398
AT1G06530	668.065	0.294059	0.298143	0.986305	0.323984	0.59326	487.871	756.221	555.451	579.511	539.243	1090.09
AT1G06540	6.83101	0.594099	1.91572	0.310117	0.756472	0.901956	7.73282	0	8.67892	0	10.4985	14.0758
AT1G06550	215.678	0.273119	0.374477	0.729333	0.465798	0.718112	279.787	188.266	117.56	264.522	228.105	215.829
AT1G06560	96.2224	0.1749	0.527491	0.33157	0.740214	0.893156	107.556	48.6458	114.404	125.3	56.3104	125.118
AT1G06570	1043.27	-0.0450806	0.194847	-0.231364	0.817032	0.929439	991.91	984.919	1201.64	1021.54	977.319	1082.27
AT1G06580	82.4089	0.601232	0.679737	0.884506	0.376423	0.644945	70.2983	34.1152	91.5231	118.339	19.0883	161.09
AT1G06590	86.725	0.172857	0.552762	0.312714	0.754498	0.901417	134.27	72.021	37.8716	111.378	72.5354	92.2746
AT1G06610	0	NA	NA	NA	NA	NA	0	0	0	0	0	0
AT1G06620	1082.82	0.489011	0.251191	1.94677	0.0515621	0.19825	750.083	827.61	1127.47	878.838	1536.6	1376.3
AT1G06630	953.833	0.552407	0.281747	1.96065	0.0499195	0.193938	832.332	841.509	648.552	678.707	1617.73	1104.17
AT1G06640	1315.88	1.24459	0.213749	5.82268	5.79e-09	4.49e-07	700.875	823.82	819.763	1399.18	2156.02	1995.63
AT1G06645	1366.49	0.799925	0.215519	3.71162	0.000205936	0.00331213	899.819	977.338	1112.48	2189.26	1398.21	1621.84
AT1G06650	1737.3	0.312041	0.181554	1.71873	0.0856643	0.27396	1646.39	1350.71	1653.73	1783.78	1888.78	2100.42
AT1G06660	20.1159	0.398496	0.942189	0.422947	0.672334	0.857318	16.1686	17.0576	18.9358	8.70137	23.8603	35.9715
AT1G06670	506.783	0.393205	0.244024	1.61134	0.107106	0.314528	475.92	382.217	455.249	640.421	480.07	606.823
AT1G06680	20667.2	0.112784	0.170783	0.660394	0.509001	0.751469	16490.6	23590.7	19497.6	23048.2	21632.7	19743.6
AT1G06690	393.671	-0.0824344	0.282656	-0.291642	0.770561	0.90931	421.087	486.458	306.918	327.171	368.403	451.989
AT1G06700	1132.3	0.177229	0.180433	0.982242	0.32598	0.595466	1045.34	1049.36	1094.33	1193.83	1242.65	1168.29
AT1G06710	15.1487	-0.306549	1.38299	-0.221656	0.824582	0.932683	21.0895	27.1658	2.36698	0	32.45	7.81988
AT1G06720	121.486	-0.0082135	0.416093	-0.0197395	0.984251	0.994107	148.33	113.086	103.358	151.404	95.4413	117.298
AT1G06730	118.377	-0.161443	0.435203	-0.370959	0.710668	0.878689	122.319	110.559	142.808	120.079	144.116	70.3789
AT1G06740.1	25.5235	-0.0747168	0.875257	-0.0853656	0.931971	0.975412	44.9909	21.48	11.8349	34.8055	18.1338	21.8957
AT1G06750	14.6342	0.884971	1.1139	0.794481	0.426915	0.68835	18.2776	9.47645	3.15597	13.9222	25.7691	17.2037
AT1G06760	553.082	0.553913	0.364899	1.51799	0.129017	0.352058	243.232	617.233	482.863	1033.72	480.07	461.373
AT1G06770	154.298	-1.07265	0.421129	-2.54707	0.0108632	0.0690767	233.391	240.07	153.065	83.5331	68.7177	147.014
AT1G06780	396.387	0.932766	0.26439	3.52799	0.000418728	0.00584791	292.441	277.976	246.166	544.706	418.033	599.003
AT1G06790	47.7661	0.716257	0.691683	1.03553	0.300423	0.568313	42.882	41.6964	23.6698	95.7151	59.1736	23.4596
AT1G06800	76.7492	-0.762191	0.541703	-1.40703	0.15942	0.397111	132.864	80.234	75.7433	67.8707	33.4044	70.3789
AT1G06810	4.23034	-2.1072	2.67342	-0.788203	0.430578	0.691249	0	0	20.5138	1.74027	0	3.12795
AT1G06820	345.387	-0.453837	0.382497	-1.18651	0.23542	0.496811	477.326	372.109	351.102	153.144	493.431	225.213
AT1G06830	13.0234	0.501942	1.2416	0.40427	0.686014	0.865081	9.13879	20.8482	2.36698	19.143	21.9515	4.69193
AT1G06840	254.955	-0.302166	0.361083	-0.836834	0.402686	0.667922	227.064	255.232	361.359	214.054	149.843	322.179
AT1G06850	109.693	0.345242	0.57591	0.599473	0.548858	0.781077	30.2283	164.89	94.6791	81.7929	114.53	172.037
AT1G06860	0.468656	-1.89084	3.97319	-0.4759	0.634146	NA	2.81193	0	0	0	0	0
AT1G06870	223.332	-0.110169	0.342154	-0.321986	0.747463	0.897494	244.638	164.89	286.404	180.988	212.834	250.236
AT1G06880	6.08537	-3.46666	2.36213	-1.4676	0.142213	0.372475	30.2283	0	3.15597	0	0	3.12795
AT1G06890	109.905	-1.42923	0.442244	-3.23176	0.00123031	0.0137346	213.004	145.306	122.294	60.9096	55.3559	62.5591
AT1G06900	255.833	-0.377885	0.302081	-1.25094	0.210956	0.468606	290.332	240.07	337.689	201.872	236.694	228.341
AT1G06910	223.097	0.449308	0.322559	1.39295	0.163636	0.403414	161.686	205.323	198.037	308.028	209.016	256.492
AT1G06920	2.39973	0.380974	2.86375	0.133034	0.894167	NA	0.702983	0	5.52295	3.48055	0	4.69193
AT1G06923	0	NA	NA	NA	NA	NA	0	0	0	0	0	0
AT1G06925	1.20571	-3.25626	3.93269	-0.827998	0.407672	NA	2.81193	4.42234	0	0	0	0
AT1G06930	10.5521	-3.69279	1.99514	-1.85089	0.0641854	0.228267	4.92088	53.6999	0	0	0	4.69193
AT1G06950	698.76	0.0453138	0.230769	0.19636	0.844328	0.94232	578.555	691.781	793.727	760.5	772.12	595.875
AT1G06960	487.772	0.621222	0.287145	2.16344	0.030507	0.140454	418.275	367.686	365.304	798.786	393.218	583.363
AT1G06970	7.3785	0.566765	1.93632	0.292702	0.76975	0.908873	0.702983	0	17.3578	1.74027	22.9059	1.56398
AT1G06980	53.9914	-1.66504	0.637535	-2.61168	0.00900982	0.06059	90.6849	82.1293	74.1653	27.8444	38.1765	10.9478
AT1G06990	4.09561	-1.08004	2.34582	-0.460411	0.645221	0.841346	7.73282	8.84469	0	1.74027	0	6.25591
AT1G07000	1410.08	-1.25639	0.30042	-4.18211	2.89e-05	0.000652671	2161.67	1729.14	2078.21	468.134	1352.4	670.946
AT1G07010	777.753	0.621821	0.23881	2.60383	0.00921872	0.0616206	738.836	440.971	658.809	920.605	961.094	946.206
AT1G07020	377.84	0.220349	0.287259	0.767077	0.443036	0.700412	274.164	428.336	344.001	367.198	355.996	497.344
AT1G07025	2.16145	2.01815	3.57814	0.56402	0.57274	NA	0	2.52705	0	10.4416	0	0
AT1G07030	175.008	-0.545123	0.398523	-1.36786	0.171356	0.413623	168.013	212.273	243.799	153.144	189.928	82.8907
AT1G07040	283.596	0.538106	0.326838	1.6464	0.0996814	0.300881	251.668	147.833	295.083	327.171	360.768	319.051
AT1G07050	4.63696	-4.12839	2.5531	-1.61701	0.105876	0.312693	18.9806	0	7.10093	1.74027	0	0
AT1G07051	0	NA	NA	NA	NA	NA	0	0	0	0	0	0
AT1G07060	0	NA	NA	NA	NA	NA	0	0	0	0	0	0
AT1G07070	55.3166	-0.29866	0.608805	-0.490567	0.623733	0.828703	39.3671	87.1834	56.8075	33.0652	59.1736	56.3031
AT1G07080	2694.73	-0.0748789	0.165375	-0.452781	0.650706	0.844664	2610.18	2582.65	3101.53	2565.16	2614.14	2694.73
AT1G07090	14.5811	-0.975218	1.12085	-0.870071	0.384261	0.651974	37.2581	12.0035	8.67892	12.1819	9.54413	7.81988
AT1G07100	0	NA	NA	NA	NA	NA	0	0	0	0	0	0
AT1G07110	4842.42	0.99555	0.156868	6.34642	2.2e-10	2.47e-08	3118.43	3172.08	3415.55	5769.01	6857.46	6721.97
AT1G07119	1.83646	-0.444571	3.82155	-0.116332	0.907389	NA	6.32685	0	0	0	0	4.69193
AT1G07120	1.86468	0.499906	3.12763	0.159835	0.873011	NA	0	3.79058	0.788993	3.48055	0	3.12795
AT1G07128	37.0393	-0.482085	0.694641	-0.694006	0.487679	0.735565	56.9417	32.8517	39.4496	40.0263	24.8147	28.1516
AT1G07130	48.6647	-0.940274	0.635581	-1.47939	0.139035	0.367446	75.2192	73.9163	43.3946	26.1041	46.7662	26.5876
AT1G07135	8441.32	-0.346061	0.185925	-1.8613	0.0627019	0.22498	11573.9	8755.61	8019.32	6341.56	8342.52	7615
AT1G07140	1239.58	-0.0923884	0.185904	-0.496968	0.619211	0.826557	1280.84	1241.42	1315.25	1108.55	1138.61	1352.84
AT1G07150	133.859	-0.667437	0.466204	-1.43164	0.152247	0.386881	151.141	110.559	231.964	55.6888	119.302	134.502
AT1G07160	151.661	-0.320382	0.425301	-0.753306	0.451266	0.706655	173.637	123.826	208.294	80.0526	136.481	187.677
AT1G07170	647.568	0.144224	0.218134	0.661172	0.508502	0.75106	629.873	663.983	550.717	746.577	628.004	666.254
AT1G07175	0.290046	1.94267	4.07804	0.476374	0.633808	NA	0	0	0	1.74027	0	0
AT1G07180	1203.05	0.31104	0.182236	1.7068	0.0878601	0.278287	1036.2	1066.42	1118	1427.02	1235.01	1335.64
AT1G07190	1.16018	4.14207	3.96124	1.04565	0.295723	NA	0	0	0	6.96109	0	0
AT1G07200	168.221	-1.41148	0.398841	-3.53895	0.000401725	0.00566845	345.868	171.84	216.184	99.1956	101.168	75.0709
AT1G07210	85.4434	0.0480118	0.546885	0.0877915	0.930042	0.974797	144.112	44.8552	63.1194	81.7929	84.9427	93.8386
AT1G07220	251.156	-0.0826757	0.297548	-0.277856	0.781123	0.913171	287.52	223.013	265.101	236.677	266.281	228.341
AT1G07230	171.923	-0.20725	0.392625	-0.527859	0.597597	0.813381	144.112	181.316	228.808	120.079	224.287	132.938
AT1G07240	677.21	0.0762058	0.28457	0.267793	0.788859	0.917624	538.485	669.038	773.213	497.718	998.316	586.491
AT1G07250	304.705	-0.631863	0.28639	-2.2063	0.0273627	0.130497	340.244	336.098	433.946	254.08	204.244	259.62
AT1G07260	9.76618	-4.15745	1.71934	-2.41805	0.015604	0.0890243	28.1193	15.1623	11.8349	3.48055	0	0
AT1G07270	11.3024	-1.38585	1.27189	-1.08959	0.275893	0.543033	4.2179	16.4259	28.4037	5.22082	5.72648	7.81988
AT1G07280	1441.97	0.151909	0.296297	0.51269	0.608168	0.819564	991.91	1713.97	1390.2	2384.17	1051.76	1119.81
AT1G07290	11.0591	0.206628	1.30716	0.158075	0.874398	0.95386	7.02983	15.7941	7.88993	22.6236	11.453	1.56398
AT1G07300	358.623	0.152539	0.261354	0.583649	0.559456	0.787962	308.61	346.838	362.937	381.12	333.09	419.146
AT1G07310	826.573	0.334216	0.273303	1.22288	0.221376	0.479676	582.07	734.741	874.993	1113.78	584.101	1069.76
AT1G07320	845.722	0.0473454	0.247091	0.191611	0.848047	0.943252	643.933	1092.32	759.8	875.358	972.547	730.377
AT1G07330	2.28763	4.10242	3.17081	1.29381	0.195732	NA	0	0	0.788993	0	6.68089	6.25591
AT1G07340	5.45721	-5.43217	2.28794	-2.37426	0.017584	0.0970332	23.9014	5.68587	3.15597	0	0	0
AT1G07350	1042.67	0.453182	0.238418	1.90079	0.05733	0.212179	1105.79	820.029	714.038	1078.97	1032.67	1504.55
AT1G07360	696.319	0.2016	0.224082	0.89967	0.368296	0.63762	602.457	587.54	753.488	823.149	760.667	650.614
AT1G07370	24.8379	-1.04904	0.989176	-1.06052	0.288907	0.557214	11.9507	35.3788	52.8625	8.70137	5.72648	34.4075
AT1G07380	89.8898	0.873988	0.475144	1.83942	0.0658537	0.232149	63.2685	80.8657	45.7616	139.222	94.4869	115.734
AT1G07390	86.4625	0.0722651	0.499619	0.14464	0.884995	0.958598	122.319	68.8622	61.5414	78.3123	78.2618	109.478
AT1G07400	20.2768	-1.87923	1.14303	-1.64408	0.10016	0.301762	22.4955	51.8046	21.3028	0	5.72648	20.3317
AT1G07410	3.31373	5.68244	2.96652	1.91552	0.055426	0.207528	0	0	0	0	10.4985	9.38386
AT1G07420	337.457	0.575239	0.31935	1.80128	0.0716591	0.245712	319.857	180.684	313.23	454.211	453.346	303.411
AT1G07430	440.129	0.100894	0.398324	0.253296	0.800039	0.921662	520.208	272.922	482.074	175.768	517.292	672.51
AT1G07440	1156.91	0.117184	0.188828	0.620587	0.534872	0.770652	1131.1	1003.87	1195.32	1119	1198.74	1293.41
AT1G07450	48.5654	0.499979	0.63924	0.782145	0.434129	0.694295	49.2088	29.6929	41.8166	78.3123	61.0824	31.2795
AT1G07460	0	NA	NA	NA	NA	NA	0	0	0	0	0	0
AT1G07470	831.059	0.100653	0.215237	0.467637	0.640044	0.838119	775.391	862.357	769.268	699.59	903.829	975.921
AT1G07473	45.2288	1.32498	0.780718	1.69712	0.0896733	0.281819	44.288	25.9023	7.10093	33.0652	51.5383	109.478
AT1G07476	8.36273	-1.76266	1.85714	-0.949125	0.342557	0.612641	0	22.7435	15.7799	6.96109	0	4.69193
AT1G07480	890.59	0.328706	0.225421	1.45819	0.144789	0.376193	807.728	887.628	674.589	784.863	1142.43	1046.3
AT1G07485	1.76981	2.61819	2.96506	0.883014	0.377229	NA	0.702983	0	0.788993	3.48055	0.954413	4.69193
AT1G07490	0	NA	NA	NA	NA	NA	0	0	0	0	0	0
AT1G07500	171.924	-0.850379	0.43027	-1.97638	0.0481112	0.189101	315.64	111.19	237.487	111.378	147.934	107.914
AT1G07510	240.395	-0.0967246	0.313055	-0.308969	0.757345	0.902246	299.471	200.901	244.588	241.898	209.971	245.544
AT1G07520	231.263	0.489724	0.330922	1.47988	0.138906	0.367248	239.014	150.991	186.991	321.951	263.418	225.213
AT1G07530	270.357	0.296149	0.343345	0.862543	0.388389	0.6555	347.274	160.468	220.918	276.704	332.136	284.644
AT1G07540	0	NA	NA	NA	NA	NA	0	0	0	0	0	0
AT1G07550	0	NA	NA	NA	NA	NA	0	0	0	0	0	0
AT1G07560	0.814419	1.26969	3.97323	0.319561	0.749301	NA	1.40597	0	0	3.48055	0	0
AT1G07570	82.6067	-0.43181	0.541607	-0.797276	0.425291	0.686869	131.458	64.4399	88.3672	106.157	62.9912	42.2274
AT1G07580	0	NA	NA	NA	NA	NA	0	0	0	0	0	0
AT1G07590	1912.89	0.671663	0.249282	2.69439	0.00705181	0.0506483	1945.86	1555.4	925.488	1940.41	2592.19	2518
AT1G07600	0	NA	NA	NA	NA	NA	0	0	0	0	0	0
AT1G07610	397.808	0.290106	0.320566	0.904978	0.365477	0.635049	533.564	260.918	280.092	382.86	508.702	420.71
AT1G07615	88.5709	-0.022218	0.499757	-0.0444577	0.96454	0.986462	59.0506	116.244	93.1011	69.6109	118.347	75.0709
AT1G07620	130.358	0.133905	0.478014	0.280128	0.779379	0.912567	208.786	74.5481	89.1562	151.404	104.985	153.27
AT1G07630	407.228	0.0975511	0.251934	0.387209	0.698602	0.872399	439.365	331.676	409.487	419.406	418.033	425.402
AT1G07640	23.7416	1.12869	0.893468	1.26327	0.206492	0.46231	14.7627	10.1082	19.7248	27.8444	15.2706	54.7392
AT1G07645	0	NA	NA	NA	NA	NA	0	0	0	0	0	0
AT1G07650	925.602	0.86838	0.218968	3.96578	7.32e-05	0.00142782	672.755	578.064	716.405	969.332	1409.67	1207.39
AT1G07660	482.881	-0.243275	0.252736	-0.962563	0.335767	0.605682	598.942	463.714	508.111	368.938	435.212	522.368
AT1G07670	278.275	0.427074	0.316555	1.34913	0.177295	0.423366	160.28	271.658	280.092	318.47	304.458	334.691
AT1G07680	0	NA	NA	NA	NA	NA	0	0	0	0	0	0
AT1G07690	0	NA	NA	NA	NA	NA	0	0	0	0	0	0
AT1G07700	2048.07	0.462537	0.166272	2.7818	0.00540578	0.041718	1669.59	1633.74	1865.18	2330.23	2467.16	2322.5
AT1G07702	0	NA	NA	NA	NA	NA	0	0	0	0	0	0
AT1G07705	245.665	-0.13233	0.352471	-0.375435	0.707337	0.876596	296.659	221.749	253.267	139.222	264.372	298.719
AT1G07710	29.6861	1.02551	0.923435	1.11054	0.266766	0.532751	12.6537	5.68587	40.2386	62.6499	16.225	40.6634
AT1G07720	410.151	-1.65874	0.305533	-5.429	5.67e-08	3.26e-06	836.55	514.255	519.946	189.69	247.193	153.27
AT1G07725	0	NA	NA	NA	NA	NA	0	0	0	0	0	0
AT1G07728	1.39592	-2.33969	3.84264	-0.608875	0.542608	NA	0	5.05411	2.36698	0	0.954413	0
AT1G07730	0	NA	NA	NA	NA	NA	0	0	0	0	0	0
AT1G07740	26.6636	0.121858	1.25113	0.0973987	0.92241	0.971387	0	69.494	7.10093	12.1819	30.5412	40.6634
AT1G07745	513.553	0.694346	0.259775	2.67287	0.00752048	0.052894	373.284	459.292	344.001	516.861	596.508	791.372
AT1G07747	0	NA	NA	NA	NA	NA	0	0	0	0	0	0
AT1G07750	221.792	-1.35492	0.3758	-3.60543	0.000311631	0.00460342	236.202	485.194	235.12	128.78	125.028	120.426
AT1G07760	0.260663	1.94267	4.07804	0.476374	0.633808	NA	0	0	0	0	0	1.56398
AT1G07770	330.595	-0.221993	0.304807	-0.728307	0.466426	0.718609	291.035	446.657	329.799	374.159	307.321	234.596
AT1G07780	50.3233	0.235655	0.621057	0.379442	0.70436	0.875342	49.2088	45.487	43.3946	74.8318	29.5868	59.4311
AT1G07790	247.283	-0.836647	0.416236	-2.01003	0.0444279	0.179162	163.795	501.62	285.615	221.015	192.791	118.862
AT1G07795	0	NA	NA	NA	NA	NA	0	0	0	0	0	0
AT1G07800.1	0	NA	NA	NA	NA	NA	0	0	0	0	0	0
AT1G07810	406.285	-0.0128888	0.282029	-0.0457001	0.963549	0.98604	344.462	346.206	534.148	440.289	428.531	344.075
AT1G07820	883.496	0.229103	0.34597	0.662205	0.50784	0.750668	466.781	1098.64	873.415	1543.62	675.724	642.794
AT1G07830	230.201	0.322766	0.366543	0.880567	0.378552	0.646951	225.658	259.023	127.817	318.47	193.746	256.492
AT1G07840	403.457	0.626775	0.244947	2.55882	0.0105029	0.0674782	325.481	302.615	323.487	454.211	480.07	534.88
AT1G07850	9.45514	0.237364	1.67821	0.141439	0.887523	0.959263	0.702983	25.2705	0	8.70137	9.54413	12.5118
AT1G07860	0.887282	2.61752	3.98686	0.656537	0.511479	NA	0	0.631763	0	0	0	4.69193
AT1G07870	511.174	0.436788	0.239109	1.82673	0.0677401	0.236553	404.918	397.379	500.221	636.94	519.201	608.387
AT1G07880	12.5517	-0.0677579	1.55875	-0.0434695	0.965327	0.98673	36.5551	1.89529	0	22.6236	9.54413	4.69193
AT1G07885	0	NA	NA	NA	NA	NA	0	0	0	0	0	0
AT1G07890	7455.98	0.261533	0.180424	1.44955	0.147185	0.379574	6072.37	7324.67	6951.02	6386.8	9070.74	8930.3
AT1G07900	223.783	-3.68019	1.91996	-1.91681	0.055262	0.207071	565.902	173.735	505.744	3.48055	0	93.8386
AT1G07901	44.0716	0.261825	0.718347	0.364483	0.715497	0.880975	23.9014	23.3752	73.3763	46.9874	63.9457	32.8435
AT1G07910	129.708	0.731037	0.421006	1.73641	0.082492	0.268342	94.9028	92.8692	104.147	174.027	101.168	211.137
AT1G07920	1938.37	-0.576696	0.185158	-3.11461	0.00184186	0.0186777	2026.7	2390.59	2543.71	1773.34	1489.84	1406.01
AT1G07930	985.128	-0.116448	0.215015	-0.541584	0.588105	0.807895	1034.09	1196.56	843.433	1044.16	962.048	830.471
AT1G07940	851.724	-0.219866	0.241636	-0.909904	0.362873	0.632966	687.518	971.652	1088.81	929.306	660.454	772.604
AT1G07950	141.195	-0.11468	0.450633	-0.254488	0.799119	0.921222	212.301	118.14	109.67	97.4553	107.849	201.753
AT1G07960	585.454	0.310893	0.250958	1.23883	0.21541	0.473265	662.913	488.985	415.799	593.433	633.73	717.865
AT1G07970	129.88	0.227388	0.404516	0.562122	0.574033	0.7988	105.448	133.302	120.716	147.923	171.794	100.094
AT1G07980	186.576	-0.227693	0.337971	-0.673705	0.500499	0.744711	198.944	219.222	186.202	137.482	189.928	187.677
AT1G07985	33.5084	-1.01728	0.887191	-1.14663	0.251536	0.516013	97.7147	10.74	26.0368	20.8833	19.0883	26.5876
AT1G07990	544.972	0.00603077	0.297398	0.0202785	0.983821	0.993919	649.557	466.241	515.212	396.782	442.848	799.192
AT1G08000	124.625	-0.487541	0.402649	-1.21084	0.225958	0.485189	172.231	119.403	145.175	87.0137	109.757	114.17
AT1G08005	0.394496	-1.62795	3.98632	-0.408383	0.682993	NA	0	0	2.36698	0	0	0
AT1G08010	389.81	-0.765754	0.269641	-2.8399	0.00451278	0.0362663	466.078	564.797	443.414	245.379	345.497	273.696
AT1G08030	344.082	-0.320896	0.364104	-0.881331	0.378139	0.64663	563.09	216.063	366.882	273.223	238.603	406.634
AT1G08032	0	NA	NA	NA	NA	NA	0	0	0	0	0	0
AT1G08035	13.1728	-0.213351	1.47562	-0.144584	0.885039	0.958598	26.7134	15.1623	0.788993	0	23.8603	12.5118
AT1G08040	315.312	0.23534	0.31096	0.75682	0.449158	0.704908	316.343	279.239	272.202	475.095	281.552	267.44
AT1G08050	9.76591	-0.00716305	1.76523	-0.00405785	0.996762	0.999021	0	18.9529	10.2569	12.1819	0	17.2037
AT1G08060	140.348	1.37816	0.415559	3.3164	0.000911864	0.0109653	71.7043	67.5987	94.6791	151.404	168.931	287.772
AT1G08065	0.117164	0.00155855	4.08047	0.000381954	0.999695	NA	0.702983	0	0	0	0	0
AT1G08070	25.6833	-1.10335	0.910071	-1.21238	0.225368	0.484734	63.2685	12.6353	29.1927	12.1819	13.3618	23.4596
AT1G08080	0.234328	-0.89133	4.03841	-0.220713	0.825316	NA	1.40597	0	0	0	0	0
AT1G08090	0.657494	-2.37014	3.95453	-0.599347	0.548942	NA	0	0	3.94496	0	0	0
AT1G08100	0	NA	NA	NA	NA	NA	0	0	0	0	0	0
AT1G08105.1	0.758118	1.1225	3.98291	0.281829	0.778074	NA	0	0.631763	0.788993	0	0	3.12795
AT1G08110	1210.46	0.636214	0.205606	3.09434	0.00197254	0.01971	1087.52	808.025	946.791	1693.29	1296.09	1431.04
AT1G08115	2.58223	2.03271	2.52828	0.803987	0.421404	NA	0.702983	0	2.36698	1.74027	2.86324	7.81988
AT1G08120	0.870137	3.72098	3.97947	0.935044	0.349766	NA	0	0	0	5.22082	0	0
AT1G08125	271.788	0.614433	0.357284	1.71973	0.085481	0.273636	164.498	227.435	252.478	210.573	298.731	477.013
AT1G08130	70.0141	-0.464174	0.547505	-0.847799	0.39655	0.663243	61.8625	94.1328	86.7892	67.8707	34.3589	75.0709
AT1G08135	0.937311	-2.89052	3.94013	-0.73361	0.463186	NA	5.62387	0	0	0	0	0
AT1G08140	0	NA	NA	NA	NA	NA	0	0	0	0	0	0
AT1G08150	1.62842	-3.68744	3.92601	-0.939234	0.347611	NA	9.13879	0.631763	0	0	0	0
AT1G08160	0	NA	NA	NA	NA	NA	0	0	0	0	0	0
AT1G08165	0	NA	NA	NA	NA	NA	0	0	0	0	0	0
AT1G08170	2.0853	5.00222	3.93691	1.2706	0.203872	NA	0	0	0	0	0	12.5118
AT1G08180	26.1811	-1.78208	0.82898	-2.14973	0.0315766	0.143986	49.2088	40.4329	32.3487	10.4416	15.2706	9.38386
AT1G08190	552.076	0.314548	0.252903	1.24375	0.213592	0.471389	617.922	463.083	394.496	631.719	542.106	663.126
AT1G08200	1478.85	-0.188275	0.235575	-0.799213	0.424167	0.686273	1564.84	1337.44	1826.52	964.112	1752.3	1427.91
AT1G08210	198.384	0.0378639	0.352355	0.107459	0.914424	0.969256	248.153	163.627	175.945	154.884	209.971	237.724
AT1G08220	100.45	-0.695507	0.472097	-1.47323	0.140689	0.36986	126.537	135.197	109.67	107.897	46.7662	76.6348
AT1G08230	1234.06	-0.586402	0.214217	-2.73743	0.00619219	0.0460229	1422.14	1644.48	1380.74	889.28	1238.83	828.907
AT1G08240	0	NA	NA	NA	NA	NA	0	0	0	0	0	0
AT1G08250	258.837	-0.0755589	0.397687	-0.189996	0.849313	0.943558	236.905	204.691	357.414	156.625	406.58	190.805
AT1G08260	52.6803	-0.392538	0.754583	-0.520205	0.602921	0.816577	89.2789	37.274	52.0735	67.8707	8.58971	60.9951
AT1G08270	11.8428	-0.471996	1.48312	-0.318244	0.7503	0.899027	13.3567	1.26353	26.8257	0	12.4074	17.2037
AT1G08280	25.9062	-1.0552	0.907598	-1.16263	0.24498	0.508591	59.7536	26.5341	18.9358	19.143	24.8147	6.25591
AT1G08290	1.30314	-3.36534	3.93081	-0.856145	0.391917	NA	7.02983	0	0.788993	0	0	0
AT1G08300	17.3393	-0.306099	1.03894	-0.294627	0.768279	0.907723	26.7134	5.68587	25.2478	10.4416	17.1794	18.7677
AT1G08310	218.549	-1.358	0.343076	-3.95831	7.55e-05	0.00146135	390.156	302.615	250.9	135.741	136.481	95.4026
AT1G08315	279.279	-0.349554	0.296195	-1.18015	0.237942	0.500063	326.184	275.449	338.478	198.391	285.369	251.8
AT1G08320	16.9375	-1.62345	1.02783	-1.5795	0.114222	0.3268	16.1686	37.9058	22.8808	6.96109	11.453	6.25591
AT1G08340	2.3309	-0.996698	2.92532	-0.340715	0.733318	NA	0.702983	0	8.67892	1.74027	2.86324	0
AT1G08350	137.842	0.248996	0.411807	0.604644	0.545416	0.778396	154.656	87.8151	134.918	186.209	116.438	147.014
AT1G08360	1053.91	-0.166977	0.210873	-0.791835	0.428457	0.689695	1310.36	1015.88	1017.01	1155.54	919.099	905.542
AT1G08370	502.861	0.423622	0.257714	1.64377	0.100224	0.30185	418.978	384.744	483.652	706.551	452.392	570.851
AT1G08380	30544.1	0.0889862	0.162886	0.54631	0.584853	0.805473	25218.8	34244.1	29343.4	33909.2	31085.2	29463.7
AT1G08390	291.722	0.697876	0.354575	1.96821	0.0490445	0.191556	120.21	234.384	313.23	342.834	367.449	372.226
AT1G08400	105.09	-0.273754	0.514245	-0.532342	0.594489	0.811255	56.9417	172.471	115.982	102.676	118.347	64.123
AT1G08410	128.586	-0.635237	0.482192	-1.31739	0.187707	0.437441	138.488	185.107	147.542	55.6888	172.749	71.9429
AT1G08420	160.95	-0.0562885	0.38555	-0.145995	0.883925	0.958046	188.4	190.161	112.826	180.988	125.982	167.345
AT1G08430	0.318138	2.47973	4.06038	0.610715	0.541388	NA	0	0	0	0	1.90883	0
AT1G08440	0	NA	NA	NA	NA	NA	0	0	0	0	0	0
AT1G08450	2676.61	0.18742	0.254549	0.736282	0.461559	0.714994	2748.67	2612.34	2150.79	1665.44	3909.27	2973.12
AT1G08460	231.86	-0.110507	0.316523	-0.349128	0.726993	0.886244	225.658	284.925	210.661	257.561	191.837	220.521
AT1G08465	132.913	-0.326712	0.413512	-0.79009	0.429475	0.690616	156.062	175.63	111.248	113.118	89.7148	151.706
AT1G08470	78.9455	0.169463	0.494148	0.34294	0.731644	0.889254	75.9222	78.9704	67.8534	66.1304	70.6265	114.17
AT1G08480	689.05	0.376457	0.2364	1.59246	0.111282	0.322374	552.545	502.884	744.02	847.513	800.752	686.586
AT1G08490	914.494	-0.211052	0.234082	-0.901613	0.367262	0.636774	717.746	1108.11	1117.21	962.371	802.661	778.86
AT1G08500	12.2282	-2.8094	1.60529	-1.75009	0.0801022	0.263498	2.10895	27.1658	35.5047	0	8.58971	0
AT1G08510	696.949	-0.691487	0.226223	-3.05666	0.00223821	0.0216054	1028.46	841.509	712.46	525.563	532.562	541.136
AT1G08520	1218.49	-0.00616414	0.209732	-0.0293906	0.976553	0.990934	1178.2	1496.02	987.819	1254.74	1136.71	1257.44
AT1G08530	247.196	-0.672529	0.324489	-2.07258	0.0382118	0.163295	227.064	289.979	394.496	186.209	189.928	195.497
AT1G08540	468.882	0.293859	0.271776	1.08126	0.279583	0.547298	409.136	528.154	325.854	603.875	506.793	439.477
AT1G08550	894.923	0.790039	0.249488	3.16664	0.00154209	0.016283	510.366	564.797	892.351	1119	1002.13	1280.9
AT1G08560	41.9758	-1.12879	0.996147	-1.13315	0.25715	0.522119	18.2776	147.201	7.88993	6.96109	49.6295	21.8957
AT1G08570	1633.64	-0.815101	0.221726	-3.67617	0.000236762	0.00370715	2017.56	2277.51	1957.49	819.669	1404.9	1324.69
AT1G08580	361.119	-1.14187	0.295259	-3.86735	0.000110024	0.00200234	424.602	655.77	411.065	233.197	248.147	193.933
AT1G08590	3.40649	-1.65585	2.61906	-0.632232	0.527235	0.765902	14.7627	0.631763	0	3.48055	0	1.56398
AT1G08592	0	NA	NA	NA	NA	NA	0	0	0	0	0	0
AT1G08600	326.843	0.703384	0.281061	2.5026	0.0123284	0.07555	290.332	241.965	213.028	468.134	355.042	392.558
AT1G08610	89.271	-0.254207	0.55885	-0.454876	0.649199	0.843971	108.962	83.3928	97.8351	135.741	31.4956	78.1988
AT1G08620	345.247	0.669287	0.342532	1.95394	0.0507087	0.195963	369.769	222.381	207.505	294.106	386.537	591.183
AT1G08630	50.5585	-1.4877	0.765943	-1.94231	0.0521	0.199644	24.6044	129.512	68.6424	43.5068	10.4985	26.5876
AT1G08640	1119.75	0.326924	0.202646	1.61328	0.106685	0.31383	876.62	1088.53	1013.86	1453.13	1146.25	1140.14
AT1G08650	773.268	-0.689879	0.293746	-2.34856	0.0188462	0.101568	892.789	894.577	1076.19	391.562	469.571	914.926
AT1G08660	920.955	-0.0318737	0.212861	-0.14974	0.88097	0.956807	1060.8	890.787	843.433	861.435	1062.26	807.012
AT1G08670	0.117164	0.00155855	4.08047	0.000381954	0.999695	NA	0.702983	0	0	0	0	0
AT1G08680	323.821	0.529262	0.291817	1.81368	0.0697274	0.241637	277.678	255.864	260.368	461.173	279.643	408.198
AT1G08695	1.18844	-3.23217	3.93312	-0.821782	0.411201	NA	4.92088	0.631763	1.57799	0	0	0
AT1G08700	187.439	0.430036	0.343704	1.25118	0.210869	0.468606	167.31	131.407	179.89	243.638	175.612	226.777
AT1G08710	404.693	0.524188	0.327349	1.60131	0.109308	0.318709	215.816	424.545	356.625	323.691	607.007	500.472
AT1G08720	343.647	1.14532	0.292098	3.921	8.82e-05	0.00166706	205.271	257.759	178.312	414.185	415.17	591.183
AT1G08730	12.0321	1.84604	1.63758	1.1273	0.259617	0.524305	0	0	15.7799	29.5847	14.3162	12.5118
AT1G08735.1	0	NA	NA	NA	NA	NA	0	0	0	0	0	0
AT1G08740.1	0	NA	NA	NA	NA	NA	0	0	0	0	0	0
AT1G08750	283.28	-0.0237157	0.346322	-0.0684787	0.945405	0.979794	320.56	312.723	221.707	391.562	179.43	273.696
AT1G08760	167.954	-0.445591	0.387431	-1.15012	0.250096	0.514464	193.32	212.904	174.367	106.157	114.53	206.445
AT1G08770	298.63	-0.353985	0.394436	-0.897445	0.369482	0.638916	275.57	406.224	325.065	261.041	406.58	117.298
AT1G08780	224.527	-0.0955634	0.321348	-0.297383	0.766174	0.906818	265.728	199.637	231.175	174.027	235.74	240.852
AT1G08790	0	NA	NA	NA	NA	NA	0	0	0	0	0	0
AT1G08800	211.501	-0.597857	0.37419	-1.59774	0.110101	0.320297	323.372	173.103	266.679	172.287	119.302	214.265
AT1G08810	260.164	-2.3169	0.35029	-6.61422	3.74e-11	5.27e-09	503.336	413.805	381.872	67.8707	65.8545	128.246
AT1G08820	343.654	0.455009	0.290124	1.56833	0.116804	0.331614	345.868	241.965	280.881	480.316	318.774	394.122
AT1G08830	2103.43	-0.259384	0.209809	-1.23628	0.216353	0.474364	2450.6	2388.07	2038.76	1397.44	2052.94	2292.79
AT1G08840	179.747	-0.231178	0.413334	-0.5593	0.575957	0.799868	269.946	163.627	149.12	201.872	198.518	95.4026
AT1G08845	159.985	-0.752095	0.499949	-1.50434	0.132493	0.357009	115.992	177.526	307.707	120.079	52.4927	186.113
AT1G08860	0.580091	3.12435	4.01598	0.77798	0.436581	NA	0	0	0	3.48055	0	0
AT1G08870	0	NA	NA	NA	NA	NA	0	0	0	0	0	0
AT1G08880	377.935	-0.108604	0.338081	-0.321238	0.74803	0.897777	244.638	503.515	428.423	445.51	404.671	240.852
AT1G08890	602.685	-0.940203	0.247267	-3.80237	0.000143316	0.00247826	875.917	602.702	897.874	414.185	370.312	455.117
AT1G08900	2752.37	0.285766	0.20831	1.37183	0.170115	0.412004	2505.43	2389.33	2550.02	2131.84	3695.49	3242.12
AT1G08910	994.618	0.86176	0.225219	3.82632	0.000130075	0.0022899	762.737	646.926	706.937	1460.09	950.595	1440.42
AT1G08920	717.612	-0.477373	0.240886	-1.98174	0.0475086	0.187319	876.62	755.589	876.571	494.238	774.029	528.624
AT1G08930	14897.7	0.055418	0.214138	0.258795	0.795793	0.920045	17066.3	13073.7	13698.5	10927.2	20344.3	14276
AT1G08940	287.194	-0.593432	0.29036	-2.04378	0.0409753	0.170861	358.522	353.788	325.065	180.988	257.691	247.108
AT1G08950	1.45023	4.46771	3.95032	1.13097	0.258066	NA	0	0	0	8.70137	0	0
AT1G08960	98.0159	-0.290584	0.543989	-0.534173	0.593222	0.810878	80.8431	93.501	148.331	156.625	52.4927	56.3031
AT1G08970	350.402	-0.0217246	0.262366	-0.0828025	0.934009	0.976443	362.739	342.416	355.047	325.431	400.853	315.923
AT1G08980	1915.29	0.459358	0.183574	2.50231	0.0123385	0.0755665	1678.72	1418.31	1743.67	2117.91	2518.7	2014.4
AT1G08985	16.7238	-1.1716	1.26144	-0.928777	0.353005	0.623308	39.3671	29.0611	0.788993	19.143	5.72648	6.25591
AT1G08990	0.825077	-2.70581	3.94467	-0.685942	0.49275	NA	2.10895	1.26353	1.57799	0	0	0
AT1G09000	9.65442	0.218615	1.63458	0.133744	0.893605	0.961513	18.9806	0.631763	7.10093	22.6236	8.58971	0
AT1G09010	813.953	0.639989	0.218471	2.9294	0.00339622	0.0295011	752.895	639.976	516.001	990.216	1021.22	963.409
AT1G09020	371.053	-0.745106	0.311589	-2.39131	0.0167885	0.0937582	459.048	631.763	303.762	271.483	300.64	259.62
AT1G09026	0	NA	NA	NA	NA	NA	0	0	0	0	0	0
AT1G09030	0	NA	NA	NA	NA	NA	0	0	0	0	0	0
AT1G09040	38.3269	-0.448149	0.87596	-0.511609	0.608925	0.820006	27.4164	8.84469	96.2571	50.4679	21.9515	25.0236
AT1G09050	35.7761	-0.449053	0.965603	-0.465049	0.641896	0.838952	40.0701	71.3893	12.6239	1.74027	37.2221	51.6112
AT1G09060	247.159	0.191942	0.330266	0.581173	0.561124	0.789042	295.253	188.266	208.294	238.417	224.287	328.435
AT1G09070	16845.9	-0.431312	0.147717	-2.91985	0.00350201	0.0301515	17357.4	20541.8	20138.2	13936.1	14904.1	14197.8
AT1G09080	38.1948	0.699116	0.912553	0.76611	0.443611	0.700917	7.02983	46.7505	33.1377	78.3123	7.6353	56.3031
AT1G09090	0.318138	2.47973	4.06038	0.610715	0.541388	NA	0	0	0	0	1.90883	0
AT1G09100	116.272	-0.367515	0.401184	-0.916076	0.359627	0.630124	146.924	121.93	123.872	104.416	92.578	107.914
AT1G09110	0.290046	1.94267	4.07804	0.476374	0.633808	NA	0	0	0	1.74027	0	0
AT1G09130	881.737	-0.155816	0.19324	-0.806336	0.420049	0.682782	959.572	912.898	916.02	779.643	858.971	863.315
AT1G09140	5020.94	0.60742	0.155846	3.89756	9.72e-05	0.00181186	4367.64	3743.83	3825.82	5969.14	5764.65	6454.53
AT1G09150	297.285	0.0159288	0.324481	0.0490902	0.960847	0.985218	289.629	324.095	272.202	422.887	265.327	209.573
AT1G09155	1.04265	3.99744	3.96693	1.00769	0.313602	NA	0	0	0	0	0	6.25591
AT1G09157	20.5157	-0.843548	1.08598	-0.77676	0.437301	0.696575	9.84177	44.2234	25.2478	17.4027	24.8147	1.56398
AT1G09160	1002.66	0.70727	0.185767	3.80729	0.000140496	0.00244394	737.43	776.437	771.635	1200.79	1289.41	1240.23
AT1G09170	2.84636	2.14201	3.24582	0.659927	0.5093	0.751573	0	0	3.15597	13.9222	0	0
AT1G09176	6.43729	3.03051	1.99441	1.5195	0.128637	0.351489	4.2179	0	0	15.6625	17.1794	1.56398
AT1G09180	125.111	1.07368	0.451706	2.37694	0.0174569	0.0965665	94.1998	89.7104	58.3854	100.936	233.831	173.601
AT1G09190	46.0107	0.134505	0.704817	0.190837	0.848653	0.943491	26.7134	78.3387	26.8257	34.8055	68.7177	40.6634
AT1G09195	148.337	0.189341	0.454851	0.416271	0.677212	0.860233	207.38	101.082	108.092	163.586	217.606	92.2746
AT1G09200	295.414	-0.603383	0.489043	-1.23381	0.217275	0.475381	146.221	592.594	329.01	414.185	179.43	111.042
AT1G09210	548.646	0.288687	0.244206	1.18215	0.237148	0.49901	499.821	416.964	566.497	509.9	687.177	611.515
AT1G09220	17.4498	-0.563356	1.04315	-0.540055	0.589159	0.808746	16.8716	36.6423	8.67892	22.6236	10.4985	9.38386
AT1G09230	1738.23	1.19489	0.171245	6.97764	3e-12	5.85e-10	1093.84	1020.3	1057.25	2208.41	2520.6	2528.95
AT1G09240	605.384	-0.537061	0.266606	-2.01444	0.0439634	0.177957	855.531	491.512	804.772	435.068	562.149	483.269
AT1G09245	0.525995	-2.04621	3.96646	-0.515879	0.605939	NA	0	0	3.15597	0	0	0
AT1G09250	846.063	-1.07193	0.294335	-3.64188	0.000270653	0.00411691	1391.2	935.642	1117.21	353.276	820.795	458.245
AT1G09260	1.40597	-3.47536	3.92905	-0.88453	0.37641	NA	8.4358	0	0	0	0	0
AT1G09270	580.977	0.0338983	0.214258	0.158212	0.87429	0.95386	570.12	587.54	564.919	569.069	593.645	600.567
AT1G09280	241.939	0.749345	0.316575	2.36704	0.0179309	0.0982912	199.647	135.829	205.927	335.873	283.461	290.9
AT1G09290	156.823	-0.113131	0.450989	-0.250851	0.801929	0.922865	130.755	185.738	172.789	196.651	190.883	64.123
AT1G09300	148.422	0.507111	0.410998	1.23385	0.217258	0.475381	146.221	139.62	82.0552	123.559	183.247	215.829
AT1G09310	6731.75	-0.672073	0.192231	-3.49617	0.000471983	0.00643796	8487.12	7617.17	8707.32	6148.39	3820.51	5609.98
AT1G09320	84.4706	0.433676	0.492666	0.880265	0.378716	0.647033	50.6148	72.6528	92.3121	81.7929	85.8971	123.554
AT1G09330	448.581	-0.0398686	0.265834	-0.149976	0.880784	0.956807	460.454	488.353	417.377	381.12	568.83	375.354
AT1G09340	5133.95	-0.026983	0.205673	-0.131193	0.895622	0.962419	4216.49	5962.58	5363.57	6224.96	3857.74	5178.33
AT1G09350	13.5356	0.525	1.66062	0.316147	0.751891	0.899848	0	28.4294	4.73396	1.74027	0.954413	45.3553
AT1G09360	0	NA	NA	NA	NA	NA	0	0	0	0	0	0
AT1G09370	0	NA	NA	NA	NA	NA	0	0	0	0	0	0
AT1G09380	0.131499	0.00155855	4.08047	0.000381954	0.999695	NA	0	0	0.788993	0	0	0
AT1G09390	377.738	0.461871	0.2666	1.73245	0.0831941	0.269725	283.302	339.257	331.377	461.173	496.295	355.023
AT1G09400	60.6799	0.854823	0.588447	1.45268	0.146314	0.378379	54.1297	43.5917	31.5597	67.8707	49.6295	117.298
AT1G09410	24.5364	-0.409259	1.22577	-0.333878	0.738472	0.89253	0	54.9634	29.1927	20.8833	34.3589	7.81988
AT1G09415	486.651	-0.0662086	0.249128	-0.265761	0.790423	0.91792	481.544	497.83	516.001	395.042	582.192	447.297
AT1G09420	180.918	0.888654	0.337281	2.63476	0.00841968	0.0576783	146.221	118.14	115.982	259.301	212.834	233.032
AT1G09421	0	NA	NA	NA	NA	NA	0	0	0	0	0	0
AT1G09430	958.723	0.204101	0.241352	0.845659	0.397743	0.664306	889.977	1043.67	736.919	1174.68	743.488	1163.6
AT1G09440	51.2081	-1.11303	0.678329	-1.64084	0.100831	0.302834	75.2192	73.9163	59.9634	46.9874	10.4985	40.6634
AT1G09450	0.525995	-2.04621	3.96646	-0.515879	0.605939	NA	0	0	3.15597	0	0	0
AT1G09460	0	NA	NA	NA	NA	NA	0	0	0	0	0	0
AT1G09470	0.920491	-2.8579	3.94089	-0.725191	0.468335	NA	0	0	5.52295	0	0	0
AT1G09480	137.639	-1.1214	0.416881	-2.68999	0.00714551	0.0509746	252.371	138.356	175.156	69.6109	83.9883	106.35
AT1G09483	0.828698	0.499317	3.94416	0.126597	0.89926	NA	2.10895	0	0	0	2.86324	0
AT1G09486	20.3862	0.630062	0.956303	0.658852	0.509991	0.752165	18.2776	6.9494	22.8808	33.0652	28.6324	12.5118
AT1G09490	1685.15	-0.221953	0.20498	-1.0828	0.278896	0.546475	2186.28	1611	1648.21	1287.8	1754.21	1623.41
AT1G09500	794.717	0.200897	0.284116	0.707097	0.479507	0.728998	773.985	660.825	786.626	609.096	1285.59	652.178
AT1G09510	14.7005	0.637081	1.22589	0.519687	0.603282	0.816789	20.3865	9.47645	4.73396	24.3638	27.678	1.56398
AT1G09520	342.403	-0.423973	0.283399	-1.49603	0.134646	0.360325	368.363	444.13	366.093	231.456	355.042	289.336
AT1G09530	728.072	-1.25654	0.323368	-3.8858	0.000101994	0.0018779	1620.38	888.259	572.02	393.302	514.428	380.046
AT1G09540	0.899152	2.61752	3.98686	0.656537	0.511479	NA	0.702983	0	0	0	0	4.69193
AT1G09550	0	NA	NA	NA	NA	NA	0	0	0	0	0	0
AT1G09560	1020.62	-0.800957	0.211618	-3.78492	0.000153756	0.0026168	1366.6	1425.89	1095.91	779.643	629.912	825.779
AT1G09570	1027.22	-0.0582522	0.243245	-0.239479	0.810734	0.926747	864.67	1288.8	987.819	1218.19	743.488	1060.38
AT1G09575	683.922	-0.843818	0.25039	-3.37002	0.000751619	0.00933211	679.082	998.186	960.204	402.003	591.736	472.321
AT1G09580	90.6226	-0.0612227	0.52799	-0.115954	0.907689	0.96676	101.933	103.609	72.5873	38.286	106.894	120.426
AT1G09590	790.855	-0.597392	0.215236	-2.77552	0.00551132	0.0423237	990.504	965.335	903.396	549.926	746.351	589.619
AT1G09600	0.318138	2.47973	4.06038	0.610715	0.541388	NA	0	0	0	0	1.90883	0
AT1G09610	4.79732	-1.05886	2.51639	-0.420783	0.673913	0.858226	0	19.5847	0	0	7.6353	1.56398
AT1G09620	347.69	-0.219246	0.314613	-0.696876	0.48588	0.734326	305.095	363.264	452.093	403.743	214.743	347.203
AT1G09625	3.51492	-4.79719	3.32616	-1.44226	0.149229	0.382334	21.0895	0	0	0	0	0
AT1G09630	102.064	-0.510898	0.536821	-0.951711	0.341244	0.611521	142.706	77.0751	141.23	78.3123	135.527	37.5354
AT1G09640	537.771	0.387334	0.250239	1.54786	0.121656	0.339749	392.265	427.704	577.543	675.226	539.243	614.643
AT1G09645	450.086	-0.415606	0.255682	-1.62548	0.10406	0.309604	434.444	537.631	572.809	332.392	444.756	378.482
AT1G09650	4.92493	-1.29312	2.73463	-0.472869	0.636307	0.836759	0	20.8482	0	8.70137	0	0
AT1G09660	595.499	-0.0353567	0.281473	-0.125613	0.900038	0.963756	658.696	480.772	671.433	508.16	816.023	437.913
AT1G09665	0	NA	NA	NA	NA	NA	0	0	0	0	0	0
AT1G09680	23.5387	-0.312372	0.950094	-0.32878	0.742322	0.894597	38.6641	26.5341	13.4129	19.143	37.2221	6.25591
AT1G09690	2330.64	-0.312252	0.178462	-1.74968	0.0801735	0.263606	2728.28	2483.46	2535.03	2224.07	2280.09	1732.89
AT1G09700	53.7702	1.30747	0.709633	1.84246	0.0654082	0.23117	33.7432	33.4835	25.2478	154.884	48.6751	26.5876
AT1G09710	175.738	0.736082	0.390328	1.8858	0.0593217	0.216885	150.438	109.295	134.918	278.444	132.663	248.672
AT1G09720	0	NA	NA	NA	NA	NA	0	0	0	0	0	0
AT1G09730	479.54	0.26645	0.273335	0.974813	0.329653	0.599365	325.481	453.606	526.258	635.2	458.118	478.577
AT1G09740	214.745	-0.468255	0.341723	-1.37028	0.1706	0.41282	241.123	310.828	196.459	182.729	211.88	145.45
AT1G09750	246.605	1.0549	0.353336	2.98553	0.00283083	0.0256371	127.24	228.067	124.661	417.666	291.096	290.9
AT1G09760	213.296	-0.181673	0.387809	-0.468459	0.639456	0.838108	276.273	240.702	161.743	299.327	142.208	159.526
AT1G09770	721.563	0.289213	0.262233	1.10288	0.270077	0.53643	858.343	471.927	617.781	739.616	698.63	943.078
AT1G09780	619.762	0.133438	0.219247	0.608621	0.542776	0.776684	538.485	658.929	575.176	692.629	613.687	639.666
AT1G09790	3.34044	5.70105	3.321	1.71667	0.0860404	0.274605	0	0	0	0	20.0427	0
AT1G09794	59.6267	-0.960163	0.610166	-1.57361	0.115578	0.329231	104.745	79.6022	52.8625	27.8444	62.9912	29.7156
AT1G09795	679.398	0.424769	0.260086	1.63319	0.102429	0.305928	465.375	774.542	500.221	654.343	782.618	899.286
AT1G09800	111.138	0.0896014	0.509976	0.175697	0.860532	0.948759	120.21	149.096	54.4405	76.572	167.977	98.5305
AT1G09810	179.608	0.117659	0.382231	0.307822	0.758218	0.902717	233.391	174.998	108.092	205.352	177.521	178.293
AT1G09812	0	NA	NA	NA	NA	NA	0	0	0	0	0	0
AT1G09815	211.234	-0.238005	0.331829	-0.717253	0.473218	0.724008	238.311	243.861	202.771	187.95	153.66	240.852
AT1G09820	22.4654	0.682514	0.904897	0.754244	0.450703	0.706398	11.9507	30.3246	9.46791	20.8833	32.45	29.7156
AT1G09830	128.856	-1.31188	0.422229	-3.10703	0.00188974	0.0190688	137.082	241.334	172	76.572	60.128	86.0187
AT1G09840	602.015	0.0655081	0.247685	0.264482	0.791409	0.918191	642.527	514.887	606.735	563.849	506.793	777.296
AT1G09850	207.935	-0.592721	0.338815	-1.74939	0.080223	0.2637	197.538	229.33	323.487	160.105	165.113	172.037
AT1G09860	11.6913	1.12836	1.68383	0.670112	0.502786	0.746815	0	0	22.0918	20.8833	16.225	10.9478
AT1G09870	739.013	-0.177463	0.222832	-0.796397	0.425801	0.687257	736.727	857.303	759.8	565.589	713.901	800.756
AT1G09880	14.9932	-1.25297	1.4039	-0.892494	0.372128	0.641272	0	36.6423	26.8257	3.48055	10.4985	12.5118
AT1G09890	0.234328	-0.89133	4.03841	-0.220713	0.825316	NA	1.40597	0	0	0	0	0
AT1G09900	46.9203	-0.342217	0.696975	-0.491003	0.623424	0.828561	75.9222	22.7435	58.3854	62.6499	30.5412	31.2795
AT1G09910	274.175	-0.119216	0.283651	-0.420291	0.674273	0.858364	308.61	251.442	296.661	268.002	270.099	250.236
AT1G09920	524.671	-0.291219	0.26873	-1.08369	0.278504	0.54602	494.197	761.907	475.763	421.146	447.62	547.392
AT1G09930	31.23	0.465988	0.793666	0.587134	0.557114	0.786373	16.1686	46.7505	15.7799	31.3249	42.9486	34.4075
AT1G09932	184.373	1.16074	0.42029	2.76176	0.00574907	0.0436273	171.528	79.6022	91.5231	184.469	361.722	217.393
AT1G09935	0	NA	NA	NA	NA	NA	0	0	0	0	0	0
AT1G09940	1941.99	0.0952007	0.197411	0.482247	0.629631	0.832218	1547.27	1854.86	2233.64	1783.78	2252.41	1979.99
AT1G09950	1995.15	-0.681676	0.245736	-2.77402	0.00553686	0.0424734	1654.12	2788.6	2928.74	1964.77	1230.24	1404.45
AT1G09960	6.43559	-1.47561	2.04077	-0.723066	0.46964	0.720957	0.702983	13.267	14.2019	10.4416	0	0
AT1G09970	5171.82	0.193828	0.177759	1.0904	0.275539	0.542858	4147.6	4618.82	5709.15	4924.97	5513.64	6116.71
AT1G09980	631.708	0.943892	0.227514	4.14871	3.34e-05	0.000741654	404.215	478.877	412.643	770.941	749.214	974.357
AT1G09995	188.108	-0.336171	0.356271	-0.943582	0.345384	0.615224	198.944	245.756	186.202	123.559	209.971	164.218
AT1G10000	67.1394	-0.486631	0.564677	-0.861787	0.388805	0.655853	106.853	54.3317	74.1653	34.8055	59.1736	73.5069
AT1G10010	0.262998	-1.03686	4.02598	-0.257542	0.79676	NA	0	0	1.57799	0	0	0
AT1G10020	357.155	0.463637	0.809869	0.572484	0.566994	0.793294	74.5162	368.318	457.616	609.096	203.29	430.093
AT1G10030	95.7799	-0.0613313	0.590283	-0.103902	0.917247	0.969857	77.3282	166.154	48.9175	151.404	44.8574	86.0187
AT1G10040	54.8648	-0.513635	0.7119	-0.721498	0.470603	0.721624	83.655	54.3317	56.8075	17.4027	93.5325	23.4596
AT1G10050	167.79	0.625066	0.385725	1.6205	0.105126	0.311616	107.556	149.728	139.652	174.027	282.506	153.27
AT1G10060	5.26573	-0.658188	2.14316	-0.307111	0.758759	0.902925	11.9507	7.58116	0	0	10.4985	1.56398
AT1G10070	275.068	0.765164	0.357998	2.13734	0.0325704	0.147109	143.409	209.745	258.79	402.003	423.759	212.701
AT1G10090	453.107	0.491374	0.281369	1.74637	0.0807472	0.2648	360.631	379.058	389.762	428.107	427.577	733.505
AT1G10095	259.475	1.26105	0.374132	3.3706	0.000750053	0.00932398	81.5461	167.417	209.083	412.445	284.415	401.942
AT1G10100	3.8043	5.88749	2.84904	2.06648	0.0387828	0.164642	0	0	0	0	18.1338	4.69193
AT1G10110	6.33235	-1.89782	1.72015	-1.10329	0.269902	0.536241	8.4358	15.1623	6.31194	5.22082	2.86324	0
AT1G10120	104.014	0.127542	0.495911	0.257188	0.797034	0.920595	47.0999	126.984	123.872	116.598	90.6692	118.862
AT1G10130	836.663	0.507941	0.228652	2.22146	0.0263199	0.127093	636.2	664.615	771.635	830.111	881.877	1235.54
AT1G10140	940.259	-0.761362	0.217628	-3.49846	0.00046795	0.00639994	949.028	1295.12	1305.78	629.979	779.755	681.894
AT1G10150	493.13	-3.88e-06	0.241669	-1.61e-05	0.999987	0.99999	518.099	412.542	548.35	508.16	452.392	519.24
AT1G10155	34.6768	0.228264	0.806586	0.283001	0.777176	0.911857	60.4566	20.8482	14.2019	45.2471	21.9515	45.3553
AT1G10160.1	133.632	-0.236053	0.493507	-0.478317	0.632424	0.834225	91.3879	195.847	145.175	207.093	71.581	90.7106
AT1G10170	319.606	0.637995	0.323615	1.97146	0.0486707	0.190678	203.865	191.424	355.047	459.432	373.175	334.691
AT1G10180	105.328	0.515628	0.458759	1.12396	0.261029	0.526429	51.3178	96.028	112.826	123.559	123.119	125.118
AT1G10190	0.887282	2.61752	3.98686	0.656537	0.511479	NA	0	0.631763	0	0	0	4.69193
AT1G10200	931.398	-0.488108	0.203681	-2.39644	0.0165553	0.0927622	959.572	1161.18	1140.09	854.474	695.767	777.296
AT1G10210	117.775	-0.152191	0.402315	-0.378289	0.705216	0.875805	106.853	146.569	118.349	116.598	108.803	109.478
AT1G10220	15.8151	-0.928979	1.50156	-0.618675	0.53613	0.771599	13.3567	27.1658	21.3028	33.0652	0	0
AT1G10230	43.1601	0.184803	0.698367	0.264622	0.791301	0.918191	19.6835	32.2199	69.4313	41.7666	45.8118	50.0472
AT1G10240	66.32	1.26254	0.538375	2.3451	0.019022	0.102246	33.7432	48.6458	34.7157	104.416	110.712	65.687
AT1G10250	0	NA	NA	NA	NA	NA	0	0	0	0	0	0
AT1G10260.1	0	NA	NA	NA	NA	NA	0	0	0	0	0	0
AT1G10270	20.3418	0.604908	1.07406	0.563199	0.573299	0.798213	7.73282	28.4294	12.6239	6.96109	55.3559	10.9478
AT1G10280	58.381	-0.587902	0.705647	-0.833138	0.404767	0.669889	42.882	46.7505	121.505	45.2471	78.2618	15.6398
AT1G10290	611.167	0.708569	0.285239	2.48412	0.012987	0.078159	643.23	341.784	406.331	753.539	599.371	922.746
AT1G10300	0	NA	NA	NA	NA	NA	0	0	0	0	0	0
AT1G10310	369.683	0.417158	0.270493	1.54221	0.123022	0.341989	252.371	334.835	362.937	440.289	447.62	380.046
AT1G10320	702.441	0.432788	0.246966	1.75242	0.0797019	0.262824	607.378	608.388	579.121	560.368	921.008	938.386
AT1G10330	31.6444	-0.251038	1.01129	-0.248237	0.803951	0.923815	6.32685	71.3893	26.0368	8.70137	64.9001	12.5118
AT1G10340	72.4345	-0.684246	0.630605	-1.08506	0.277894	0.545295	108.259	41.6964	119.138	27.8444	95.4413	42.2274
AT1G10350	144.41	-0.146095	0.384722	-0.379743	0.704136	0.875212	118.101	193.951	142.808	135.741	128.846	147.014
AT1G10360	412.562	-0.59766	0.260007	-2.29863	0.021526	0.111014	501.227	556.584	432.368	372.419	335.953	276.824
AT1G10370	589.307	0.293893	0.286319	1.02646	0.304677	0.572336	608.081	413.805	567.286	429.848	656.636	860.187
AT1G10380	7.95922	1.36709	1.85481	0.737051	0.461092	0.71473	13.3567	0	0	6.96109	13.3618	14.0758
AT1G10385	0	NA	NA	NA	NA	NA	0	0	0	0	0	0
AT1G10390	625.272	0.862222	0.240995	3.57777	0.000346543	0.00504632	478.029	364.528	488.386	788.344	681.451	950.898
AT1G10400	5.53556	-0.665589	2.1125	-0.315072	0.752707	0.900254	7.73282	0	12.6239	0	1.90883	10.9478
AT1G10410	470.339	-0.0490127	0.275813	-0.177703	0.858956	0.948047	504.039	437.812	495.487	339.353	613.687	431.657
AT1G10417	50.0865	-0.050304	0.69743	-0.0721277	0.9425	0.979133	44.9909	34.747	73.3763	17.4027	48.6751	81.3268
AT1G10419	0	NA	NA	NA	NA	NA	0	0	0	0	0	0
AT1G10430	484.229	-0.121641	0.24859	-0.489325	0.624612	0.829179	530.753	406.224	576.754	459.432	433.303	498.908
AT1G10440	0	NA	NA	NA	NA	NA	0	0	0	0	0	0
AT1G10450	98.3805	0.767842	0.508546	1.50988	0.131075	0.355038	37.9611	104.241	76.5323	111.378	163.205	96.9665
AT1G10455	0	NA	NA	NA	NA	NA	0	0	0	0	0	0
AT1G10460	1.57799	-3.638	3.92668	-0.926484	0.354195	NA	0	0	9.46791	0	0	0
AT1G10470	3135.77	-0.99903	0.247631	-4.03434	5.48e-05	0.00113583	3071.33	3836.7	5635.77	1493.15	2664.72	2112.93
AT1G10480	2.02046	-3.99798	3.64713	-1.0962	0.272992	NA	10.5448	0	1.57799	0	0	0
AT1G10490	101.139	-1.00484	0.503623	-1.99522	0.0460194	0.183772	129.349	73.2846	201.982	73.0915	52.4927	76.6348
AT1G10500	163.057	-0.951332	0.397926	-2.39073	0.0168149	0.0938318	189.806	201.533	254.845	66.1304	139.344	126.682
AT1G10510	331.81	0.619593	0.275328	2.25038	0.0244247	0.12117	248.856	271.658	263.524	489.017	350.269	367.534
AT1G10520	24.9326	0.81715	1.11213	0.734759	0.462486	0.71562	48.5059	2.52705	3.15597	40.0263	38.1765	17.2037
AT1G10522	241.764	0.154158	0.375205	0.410863	0.681173	0.862718	210.895	233.752	240.643	407.224	181.338	176.729
AT1G10530	25.5381	0.626669	0.862642	0.726453	0.467561	0.719546	28.8223	17.0576	14.2019	20.8833	19.0883	53.1752
AT1G10538	0	NA	NA	NA	NA	NA	0	0	0	0	0	0
AT1G10540	5.10939	3.29615	2.67177	1.2337	0.217316	0.475407	2.81193	0	0	27.8444	0	0
AT1G10550	158.451	-0.333843	0.594105	-0.561925	0.574167	0.798933	166.607	41.6964	321.12	222.755	68.7177	129.81
AT1G10560	63.8998	-1.45742	0.554205	-2.62975	0.00854482	0.0582703	78.7341	94.7645	108.092	22.6236	40.0853	39.0994
AT1G10570	1082.08	0.450911	0.19111	2.35944	0.0183026	0.0995554	1003.16	894.577	845.011	1185.13	1210.2	1354.4
AT1G10580	617.348	0.366218	0.238482	1.53562	0.124631	0.344592	531.456	558.479	527.836	588.213	622.277	875.827
AT1G10585	67.7674	0.89288	0.811591	1.10016	0.271262	0.537763	67.4864	38.5376	37.0827	13.9222	221.424	28.1516
AT1G10586	6.52295	-5.69054	2.12608	-2.67655	0.00743852	0.052534	16.8716	18.3211	3.94496	0	0	0
AT1G10588	0.159069	1.91537	4.07908	0.469558	0.638671	NA	0	0	0	0	0.954413	0
AT1G10590	1584.15	-0.19101	0.187143	-1.02066	0.307414	0.575267	1441.82	1787.26	1838.35	1515.78	1576.69	1345.02
AT1G10600	282.874	0.900753	0.294439	3.05922	0.00221916	0.0214417	229.876	162.995	198.826	370.678	323.546	411.326
AT1G10610	408.013	0.404267	0.269388	1.50069	0.133436	0.358197	435.147	277.344	340.845	499.459	432.349	462.937
AT1G10620	0.987301	2.7592	3.97947	0.69336	0.488084	NA	0.702983	0	0	5.22082	0	0
AT1G10630	620.932	-0.902907	0.242076	-3.72985	0.000191592	0.00312802	721.964	1002.61	703.781	417.666	483.887	395.686
AT1G10640	1.87462	-3.89033	3.92349	-0.991549	0.321418	NA	11.2477	0	0	0	0	0
AT1G10650	231.917	-0.626122	0.32203	-1.9443	0.0518594	0.198945	312.125	282.398	250.9	137.482	209.971	198.625
AT1G10652	0.525995	-2.04621	3.96646	-0.515879	0.605939	NA	0	0	3.15597	0	0	0
AT1G10657	23.7509	-1.54122	0.922159	-1.67132	0.0946591	0.291743	28.1193	31.5882	45.7616	19.143	3.81765	14.0758
AT1G10660	223.068	0.0560721	0.31733	0.176699	0.859744	0.948386	198.241	245.756	211.45	273.223	203.29	206.445
AT1G10670	871.699	-0.200198	0.22384	-0.894378	0.371119	0.640558	958.869	958.385	876.571	870.137	618.459	947.77
AT1G10680	0	NA	NA	NA	NA	NA	0	0	0	0	0	0
AT1G10682	6.71513	-0.682278	1.86683	-0.365474	0.714758	0.880661	4.2179	0	20.5138	5.22082	0.954413	9.38386
AT1G10690	43.33	-1.61391	0.845886	-1.90795	0.0563971	0.209979	107.556	9.47645	78.8993	29.5847	21.9515	12.5118
AT1G10700	801.285	-0.500866	0.240323	-2.08414	0.0371474	0.160158	703.686	1170.66	943.635	603.875	736.807	649.05
AT1G10705	0	NA	NA	NA	NA	NA	0	0	0	0	0	0
AT1G10710	1.17164	-3.21238	3.93348	-0.816674	0.414114	NA	7.02983	0	0	0	0	0
AT1G10717	0	NA	NA	NA	NA	NA	0	0	0	0	0	0
AT1G10720	681.164	-0.0625405	0.258404	-0.242026	0.80876	0.926277	467.484	790.968	829.231	636.94	641.365	720.993
AT1G10730	97.8517	-0.135926	0.556324	-0.244328	0.806977	0.92519	133.567	138.988	34.7157	73.0915	92.578	114.17
AT1G10740	695.673	0.283606	0.241416	1.17476	0.24009	0.502618	671.349	709.47	502.588	610.836	861.835	817.96
AT1G10745	0	NA	NA	NA	NA	NA	0	0	0	0	0	0
AT1G10747	0	NA	NA	NA	NA	NA	0	0	0	0	0	0
AT1G10750	1.56398	4.58558	3.94693	1.16181	0.245313	NA	0	0	0	0	0	9.38386
AT1G10760	1017.43	0.236127	0.261644	0.902476	0.366804	0.63641	1334.26	629.868	838.699	1157.28	1040.31	1104.17
AT1G10770	1.18349	-3.22179	3.93331	-0.819105	0.412727	NA	0	0	7.10093	0	0	0
AT1G10780	9.69129	-6.26084	1.84987	-3.38448	0.000713144	0.00896816	25.3074	20.2164	12.6239	0	0	0
AT1G10790	1.44649	-3.51215	3.92849	-0.894022	0.37131	NA	0	0	8.67892	0	0	0
AT1G10800	0.210588	-0.758087	4.05091	-0.18714	0.851551	NA	0	1.26353	0	0	0	0
AT1G10810	33.9153	0.734524	0.858609	0.855482	0.392285	0.659303	6.32685	23.3752	46.5506	45.2471	20.9971	60.9951
AT1G10820	337.376	0.738472	0.341766	2.16075	0.0307146	0.140998	289.629	163.627	304.551	565.589	291.096	409.762
AT1G10830	215.113	0.268643	0.374685	0.716982	0.473385	0.724101	132.864	209.745	243.01	290.626	259.6	154.834
AT1G10840	803.757	-0.650275	0.261395	-2.48771	0.012857	0.077788	816.867	1153.6	978.351	468.134	850.382	555.212
AT1G10850	58.8815	-0.0197807	0.674088	-0.0293445	0.97659	0.990934	107.556	51.1728	18.9358	69.6109	54.4015	51.6112
AT1G10865	517.473	0.323184	0.258173	1.25181	0.210638	0.468354	496.306	382.217	502.588	497.718	717.718	508.292
AT1G10870	207.432	-0.0429337	0.337806	-0.127096	0.898865	0.963527	257.292	178.789	195.67	229.716	220.469	162.654
AT1G10880	0	NA	NA	NA	NA	NA	0	0	0	0	0	0
AT1G10890	4325.29	0.52433	0.164042	3.19633	0.0013919	0.0151071	3896.64	3151.87	3596.23	4634.35	5333.26	5339.42
AT1G10900	1219.75	-0.0485024	0.200166	-0.24231	0.80854	0.926277	1259.75	1188.35	1270.28	1383.52	976.364	1240.23
AT1G10910	817.491	-0.0752865	0.218872	-0.343975	0.730865	0.888708	865.373	867.411	785.837	668.265	961.094	756.965
AT1G10920	715.113	0.47819	0.242804	1.96945	0.0489014	0.191163	697.36	508.57	587.799	643.901	859.926	993.125
AT1G10930	90.103	1.40959	0.491226	2.86953	0.00411087	0.0339242	63.9715	54.3317	29.1927	135.741	108.803	148.578
AT1G10940	3300.84	0.696212	0.17911	3.88706	0.000101467	0.00187016	2761.32	2645.83	2152.37	3525.79	4522.01	4197.71
AT1G10950	531.021	-0.47122	0.245635	-1.91838	0.0550631	0.206552	599.645	683.568	569.653	389.821	543.061	400.378
AT1G10960	929.755	-0.721617	0.237999	-3.03201	0.00242931	0.0229215	951.84	1358.29	1160.61	896.241	620.368	591.183
AT1G10970	26.9533	-0.893374	0.993839	-0.898913	0.368699	0.63794	14.0597	56.8587	34.7157	1.74027	32.45	21.8957
AT1G10980	1.02618	0.387946	3.90583	0.0993249	0.92088	NA	0	1.89529	0.788993	0	1.90883	1.56398
AT1G10990	27.97	0.370859	0.887637	0.417805	0.67609	0.859554	14.7627	16.4259	41.8166	26.1041	12.4074	56.3031
AT1G11000	134.01	-0.834393	0.457864	-1.82236	0.0684005	0.238363	254.48	153.519	108.092	85.2734	130.755	71.9429
AT1G11010	0	NA	NA	NA	NA	NA	0	0	0	0	0	0
AT1G11020	187.121	-0.583747	0.368038	-1.5861	0.112716	0.32436	198.241	264.709	209.083	161.845	101.168	187.677
AT1G11030	0	NA	NA	NA	NA	NA	0	0	0	0	0	0
AT1G11040	0	NA	NA	NA	NA	NA	0	0	0	0	0	0
AT1G11050	494.074	0.0274898	0.251772	0.109185	0.913055	0.968545	565.902	476.981	425.267	421.146	488.659	586.491
AT1G11055	0	NA	NA	NA	NA	NA	0	0	0	0	0	0
AT1G11060	201.456	0.81655	0.384471	2.12383	0.0336845	0.150317	213.004	129.512	95.4681	200.131	284.415	286.208
AT1G11070	25.5007	0.102484	1.13402	0.0903728	0.927991	0.973908	0.702983	61.9128	11.0459	34.8055	25.7691	18.7677
AT1G11080	8.55671	-3.02671	2.20268	-1.3741	0.169409	0.411056	45.6939	0	0	0	0.954413	4.69193
AT1G11090	117.47	-0.871722	0.434367	-2.00688	0.0447624	0.180146	170.825	157.309	128.606	53.9485	104.985	89.1467
AT1G11100	8.82915	0.74328	1.35474	0.548653	0.583244	0.804238	9.84177	4.42234	5.52295	5.22082	7.6353	20.3317
AT1G11110	0.234328	-0.89133	4.03841	-0.220713	0.825316	NA	1.40597	0	0	0	0	0
AT1G11112	1.6847	-3.73923	3.92533	-0.95259	0.340798	NA	0	10.1082	0	0	0	0
AT1G11120	9.05767	-1.12188	2.02768	-0.553286	0.580067	0.802293	25.3074	0	11.8349	0	0	17.2037
AT1G11125	1.70948	-3.75375	3.92515	-0.956335	0.338903	NA	0	0	10.2569	0	0	0
AT1G11130	50.5419	-0.509554	0.61472	-0.82892	0.407149	0.672365	64.6745	61.9128	51.2845	31.3249	31.4956	62.5591
AT1G11145	0	NA	NA	NA	NA	NA	0	0	0	0	0	0
AT1G11150.1	118.826	0.643945	0.406128	1.58557	0.112836	0.324649	100.527	96.6598	80.4772	161.845	115.484	157.962
AT1G11160	1.313	-3.37557	3.84693	-0.877472	0.38023	NA	1.40597	2.52705	3.94496	0	0	0
AT1G11170	27.6102	0.714213	1.12484	0.634948	0.525462	0.764563	35.1492	0	27.6147	46.9874	32.45	23.4596
AT1G11175	847.255	0.750437	0.205954	3.6437	0.000268743	0.00410003	641.121	550.898	702.992	1085.93	985.908	1116.68
AT1G11180	549.719	0.390754	0.262652	1.48773	0.136823	0.363855	460.454	367.055	600.423	523.822	631.821	714.737
AT1G11185	2.17345	5.05788	3.51137	1.44043	0.149745	NA	0	0	0	5.22082	0	7.81988
AT1G11190	3.68197	-4.86169	3.28025	-1.48211	0.138311	0.366241	0	0	22.0918	0	0	0
AT1G11200	445.958	-0.423468	0.290865	-1.45589	0.145422	0.377026	501.93	460.556	572.02	402.003	490.568	248.672
AT1G11210	1979.73	-0.499193	0.225905	-2.20975	0.0271226	0.129775	1966.24	2508.73	2485.33	1183.39	2137.88	1596.82
AT1G11220	4.19012	-5.04968	2.45321	-2.05839	0.0395526	0.166969	3.51492	8.21293	13.4129	0	0	0
AT1G11230	0	NA	NA	NA	NA	NA	0	0	0	0	0	0
AT1G11240	227.05	0.39926	0.310393	1.2863	0.198337	0.45177	184.885	213.536	188.569	304.548	242.421	228.341
AT1G11250	0	NA	NA	NA	NA	NA	0	0	0	0	0	0
AT1G11260	7850.37	0.73128	0.205838	3.5527	0.000381297	0.0054364	4487.85	6345.43	6875.28	7521.46	11119.9	10752.3
AT1G11265.1	3.13319	-1.58939	2.3261	-0.683285	0.494427	0.740898	1.40597	8.84469	3.94496	1.74027	2.86324	0
AT1G11270	232.401	0.10194	0.318488	0.320076	0.748911	0.898359	205.271	193.32	273.78	278.444	226.196	217.393
AT1G11280	155.72	0.101353	0.364386	0.278147	0.780899	0.913034	170.122	152.255	127.817	191.43	144.116	148.578
AT1G11290	36.1062	-0.247677	0.769494	-0.32187	0.747551	0.897494	52.7238	18.3211	46.5506	19.143	26.7236	53.1752
AT1G11300	93.7689	-1.19216	0.481321	-2.47684	0.0132551	0.0792961	182.073	120.035	89.1562	60.9096	57.2648	53.1752
AT1G11310	2817.12	-0.587422	0.22936	-2.56114	0.010433	0.0671439	4400.68	2968.66	2781.2	1637.6	2555.92	2558.67
AT1G11320	13.4198	-2.30393	1.7189	-1.34035	0.180131	0.426804	54.1297	0.631763	11.8349	13.9222	0	0
AT1G11330	975.463	0.732303	0.204191	3.58637	0.000335315	0.00490776	771.876	766.961	660.387	1331.31	1288.46	1033.79
AT1G11340	26.6197	-1.78942	1.24747	-1.43444	0.151447	0.385846	10.5448	46.7505	66.2754	1.74027	0	34.4075
AT1G11350	324.555	-0.653975	0.266064	-2.45796	0.0139729	0.0822164	424.602	360.737	405.542	257.561	259.6	239.288
AT1G11360	346.099	0.229751	0.301498	0.762032	0.446041	0.70248	257.995	272.922	424.478	443.77	330.227	347.203
AT1G11362	8.42944	0.932583	2.10167	0.443734	0.657235	0.848724	0	0	17.3578	19.143	0	14.0758
AT1G11370	0	NA	NA	NA	NA	NA	0	0	0	0	0	0
AT1G11380	485.961	1.69697	0.754962	2.24775	0.0245918	0.121683	81.5461	274.185	331.377	1124.22	295.868	808.576
AT1G11390	133.979	0.579486	0.519574	1.11531	0.264718	0.530679	115.992	103.609	101.78	172.287	50.5839	259.62
AT1G11400	211.734	0.00607932	0.412577	0.014735	0.988244	0.995688	273.461	182.58	177.523	127.04	164.159	345.639
AT1G11410	243	-2.2367	0.375788	-5.95203	2.65e-09	2.31e-07	544.812	303.878	355.047	52.2082	92.578	109.478
AT1G11420	0	NA	NA	NA	NA	NA	0	0	0	0	0	0
AT1G11430	672.328	0.0732602	0.241983	0.30275	0.762081	0.904653	605.269	669.669	691.946	750.058	810.296	506.728
AT1G11440	354.721	0.184938	0.301442	0.613512	0.539538	0.773943	304.392	264.077	428.423	410.705	431.395	289.336
AT1G11450	0.260663	1.94267	4.07804	0.476374	0.633808	NA	0	0	0	0	0	1.56398
AT1G11460	2.79559	-4.46705	2.86819	-1.55745	0.119365	0.336483	11.2477	3.15882	2.36698	0	0	0
AT1G11470	0.262998	-1.03686	4.02598	-0.257542	0.79676	NA	0	0	1.57799	0	0	0
AT1G11475	405.776	0.0538048	0.288746	0.18634	0.852178	0.944614	537.079	295.665	362.148	382.86	418.987	437.913
AT1G11480	591.112	0.168649	0.248063	0.679864	0.49659	0.741969	605.972	447.289	615.414	678.707	504.884	694.405
AT1G11482	8.01247	-3.39638	1.72947	-1.96382	0.049551	0.193039	36.5551	2.52705	4.73396	1.74027	0.954413	1.56398
AT1G11490	0	NA	NA	NA	NA	NA	0	0	0	0	0	0
AT1G11500	0	NA	NA	NA	NA	NA	0	0	0	0	0	0
AT1G11510	0	NA	NA	NA	NA	NA	0	0	0	0	0	0
AT1G11520	0	NA	NA	NA	NA	NA	0	0	0	0	0	0
AT1G11530	823.702	-0.243219	0.234685	-1.03636	0.300032	0.568019	826.709	1058.2	796.093	647.382	938.188	675.638
AT1G11540	7.83144	0.710478	1.73155	0.410313	0.681577	0.862863	0	11.3717	6.31194	17.4027	0.954413	10.9478
AT1G11545	49.2883	-0.323814	0.782001	-0.414084	0.678813	0.861358	73.8133	82.761	7.88993	36.5457	52.4927	42.2274
AT1G11550	0	NA	NA	NA	NA	NA	0	0	0	0	0	0
AT1G11560	0	NA	NA	NA	NA	NA	0	0	0	0	0	0
AT1G11570	0	NA	NA	NA	NA	NA	0	0	0	0	0	0
AT1G11572	5.96017	0.210913	2.07128	0.101827	0.918894	0.970715	1.40597	15.1623	0	0	6.68089	12.5118
AT1G11580	5.74721	1.41472	2.11538	0.668779	0.503637	0.747273	0	0	9.46791	1.74027	7.6353	15.6398
AT1G11590	3.65717	-0.206892	2.53685	-0.0815546	0.935001	0.976618	0	0.631763	11.0459	8.70137	0	1.56398
AT1G11592	122.166	0.0186216	0.459162	0.0405555	0.96765	0.987864	141.3	111.19	110.459	177.508	65.8545	126.682
AT1G11593	0	NA	NA	NA	NA	NA	0	0	0	0	0	0
AT1G11595	0	NA	NA	NA	NA	NA	0	0	0	0	0	0
AT1G11600	0	NA	NA	NA	NA	NA	0	0	0	0	0	0
AT1G11608	0	NA	NA	NA	NA	NA	0	0	0	0	0	0
AT1G11610	0	NA	NA	NA	NA	NA	0	0	0	0	0	0
AT1G11620	0	NA	NA	NA	NA	NA	0	0	0	0	0	0
AT1G11630	65.4347	-0.00653004	0.750523	-0.00870065	0.993058	0.997589	30.9313	55.5952	111.248	38.286	139.344	17.2037
AT1G11640	0	NA	NA	NA	NA	NA	0	0	0	0	0	0
AT1G11650	1603.57	0.393982	0.214946	1.83293	0.0668124	0.234232	1413	1229.41	1513.29	2276.28	1387.72	1801.7
AT1G11655	0.131499	0.00155855	4.08047	0.000381954	0.999695	NA	0	0	0.788993	0	0	0
AT1G11660	199.735	-0.238388	0.326835	-0.729384	0.465767	0.718112	205.974	248.915	194.092	160.105	198.518	190.805
AT1G11670	2149.5	-1.48509	0.187874	-7.90473	2.69e-15	1e-12	3630.21	2970.55	2904.28	957.151	1249.33	1185.49
AT1G11680	647.288	-0.531422	0.248481	-2.13869	0.0324609	0.146756	678.379	757.484	860.791	586.472	612.733	387.866
AT1G11684	0	NA	NA	NA	NA	NA	0	0	0	0	0	0
AT1G11690	0.781988	3.5793	3.98686	0.897773	0.369307	NA	0	0	0	0	0	4.69193
AT1G11700	48.1413	-0.817437	0.674644	-1.21166	0.225644	0.485124	40.0701	92.2375	51.2845	41.7666	18.1338	45.3553
AT1G11710	33.194	-0.395537	0.933343	-0.423786	0.671722	0.856982	42.882	42.3282	28.4037	29.5847	54.4015	1.56398
AT1G11720	1449.26	0.131144	0.211977	0.618672	0.536132	0.771599	1569.76	1231.31	1349.18	1246.04	1411.58	1887.72
AT1G11730	2.3887	5.20502	3.06306	1.69929	0.0892648	NA	0	0	0	1.74027	4.77206	7.81988
AT1G11735	1.2888	-3.34985	3.93106	-0.852149	0.394131	NA	7.73282	0	0	0	0	0
AT1G11740	4.21524	-1.44239	2.53459	-0.569082	0.5693	0.795204	6.32685	12.0035	0	6.96109	0	0
AT1G11750	1072.62	-0.118303	0.213237	-0.554794	0.579035	0.801714	1049.55	1096.74	1201.64	1282.58	898.102	907.106
AT1G11755	84.8331	0.691013	0.547624	1.26184	0.207006	0.462958	60.4566	68.8622	64.6974	113.118	43.903	157.962
AT1G11760	216.463	0.124764	0.359544	0.347007	0.728586	0.887296	136.379	226.803	258.79	229.716	267.236	179.857
AT1G11765	0	NA	NA	NA	NA	NA	0	0	0	0	0	0
AT1G11770	0.117164	0.00155855	4.08047	0.000381954	0.999695	NA	0.702983	0	0	0	0	0
AT1G11780	323.722	-0.142585	0.268793	-0.530463	0.595791	0.812431	304.392	368.318	346.368	285.405	301.594	336.255
AT1G11785	17.8619	-0.708661	1.1387	-0.622342	0.533717	0.770037	16.1686	23.3752	27.6147	3.48055	33.4044	3.12795
AT1G11790	228.519	0.23149	0.312892	0.739841	0.459397	0.713475	222.143	226.171	183.046	217.534	289.187	233.032
AT1G11800	103.794	-0.0512781	0.461711	-0.111061	0.911568	0.968262	132.864	108.032	76.5323	69.6109	123.119	112.606
AT1G11803	0	NA	NA	NA	NA	NA	0	0	0	0	0	0
AT1G11806	0	NA	NA	NA	NA	NA	0	0	0	0	0	0
AT1G11810	0	NA	NA	NA	NA	NA	0	0	0	0	0	0
AT1G11820	199.15	-1.0043	0.389017	-2.58165	0.00983304	0.0643413	181.37	272.29	342.423	146.183	86.8516	165.781
AT1G11840	864.222	-0.627976	0.222705	-2.81976	0.00480593	0.0380939	1002.45	1012.72	1135.36	670.005	823.658	541.136
AT1G11850	1.03077	0.749431	3.90496	0.191918	0.847806	NA	0	0	2.36698	0	3.81765	0
AT1G11860	4811.25	-0.128636	0.182963	-0.703074	0.482009	0.73112	4168.69	5884.88	5022.73	5139.03	4654.67	3997.52
AT1G11870	197.351	-0.0185012	0.373906	-0.0494809	0.960536	0.985218	178.558	245.756	170.422	280.184	157.478	151.706
AT1G11880	92.3781	-0.157259	0.474417	-0.331479	0.740282	0.893156	107.556	118.772	66.2754	76.572	106.894	78.1988
AT1G11890	813.691	0.262022	0.217177	1.20649	0.227628	0.48719	747.271	830.769	642.24	758.759	916.236	986.869
AT1G11900	62.6385	0.0194794	0.628891	0.0309743	0.97529	0.990717	28.8223	96.028	62.3304	43.5068	93.5325	51.6112
AT1G11905	126.363	0.352618	0.583839	0.603965	0.545867	0.778821	40.773	176.894	114.404	252.34	65.8545	107.914
AT1G11910	3382.02	0.774391	0.157141	4.92799	8.31e-07	3.32e-05	2390.14	2415.86	2681	4058.32	4251.91	4494.87
AT1G11915	0	NA	NA	NA	NA	NA	0	0	0	0	0	0
AT1G11920	0	NA	NA	NA	NA	NA	0	0	0	0	0	0
AT1G11925	0	NA	NA	NA	NA	NA	0	0	0	0	0	0
AT1G11930	1638.37	0.309865	0.20634	1.50172	0.133169	0.357943	1749.73	1367.14	1274.22	1684.58	2165.56	1589
AT1G11940	53.3557	-0.378	0.831847	-0.45441	0.649533	0.844041	57.6446	97.9233	24.4588	97.4553	6.68089	35.9715
AT1G11950	75.4681	-0.419416	0.654432	-0.640886	0.521597	0.761113	42.179	152.887	63.1194	80.0526	23.8603	90.7106
AT1G11960	1611.22	0.327708	0.237266	1.38118	0.167223	0.408461	1282.24	1643.85	1363.38	1219.93	2342.13	1815.78
AT1G11970	0.105294	0.00155855	4.08047	0.000381954	0.999695	NA	0	0.631763	0	0	0	0
AT1G11980	0.234328	-0.89133	4.03841	-0.220713	0.825316	NA	1.40597	0	0	0	0	0
AT1G11990	8.85656	-6.1323	2.37916	-2.5775	NA	NA	0.702983	52.4364	0	0	0	0
AT1G12000	328.428	-0.910668	0.310401	-2.93385	0.00334789	0.0291804	442.177	506.674	338.478	241.898	278.689	162.654
AT1G12010	9.42832	1.23558	1.87737	0.658142	0.510447	0.752512	9.13879	7.58116	0	38.286	0	1.56398
AT1G12013	3.26872	-4.69255	3.12034	-1.50386	0.132618	0.357208	18.9806	0.631763	0	0	0	0
AT1G12015	0.234328	-0.89133	4.03841	-0.220713	0.825316	NA	1.40597	0	0	0	0	0
AT1G12020	98.0438	-1.27557	0.592855	-2.15157	0.0314312	0.143556	82.952	274.185	59.1744	62.6499	63.9457	45.3553
AT1G12030	19.7195	-3.01931	1.22071	-2.47341	0.0133831	0.0797689	68.1894	18.9529	18.9358	1.74027	10.4985	0
AT1G12040	0	NA	NA	NA	NA	NA	0	0	0	0	0	0
AT1G12050	418.441	0.501962	0.278449	1.80271	0.0714341	0.245228	373.987	258.391	407.909	475.095	574.556	420.71
AT1G12060	121.66	-0.793081	0.589287	-1.34583	0.178357	0.424269	109.665	209.745	142.019	189.69	38.1765	40.6634
AT1G12064	0	NA	NA	NA	NA	NA	0	0	0	0	0	0
AT1G12070	0	NA	NA	NA	NA	NA	0	0	0	0	0	0
AT1G12080	17.384	-5.09022	1.59528	-3.1908	0.00141879	0.0153451	64.6745	34.747	1.57799	1.74027	0	1.56398
AT1G12090	4942.94	0.079017	0.16895	0.467695	0.640003	0.838119	4468.16	4654.83	5298.87	5849.06	4863.69	4523.02
AT1G12100	1.63208	-0.890278	3.86973	-0.230062	0.818044	NA	0	0	6.31194	3.48055	0	0
AT1G12110	144.398	-1.23687	0.501671	-2.46549	0.0136826	0.0809647	266.431	114.981	225.652	151.404	56.3104	51.6112
AT1G12120	488.732	-0.826956	0.302386	-2.73477	0.00624237	0.0462898	548.327	668.406	655.653	502.939	222.378	334.691
AT1G12130	5.80959	-5.52148	2.22046	-2.48663	0.0128958	0.0778505	2.81193	13.8988	18.1468	0	0	0
AT1G12140	274.907	0.0768137	0.317009	0.242308	0.808542	0.926277	279.084	186.37	337.689	290.626	288.233	267.44
AT1G12150	129.712	0.955783	0.465819	2.05183	0.040186	0.168512	112.477	78.9704	74.1653	92.2345	262.464	157.962
AT1G12160	2.55164	5.28685	3.32371	1.59064	0.11169	NA	0	0	0	12.1819	0	3.12795
AT1G12170	0	NA	NA	NA	NA	NA	0	0	0	0	0	0
AT1G12180	0	NA	NA	NA	NA	NA	0	0	0	0	0	0
AT1G12190	0	NA	NA	NA	NA	NA	0	0	0	0	0	0
AT1G12200	3.43594	-3.67356	2.7873	-1.31797	0.187515	0.437227	11.9507	0	7.10093	0	0	1.56398
AT1G12210	27.108	0.936842	0.893989	1.04793	0.294669	0.56247	23.1985	5.05411	27.6147	24.3638	27.678	54.7392
AT1G12211	2.59982	0.0393413	2.25432	0.0174515	0.986076	NA	4.2179	1.89529	1.57799	3.48055	2.86324	1.56398
AT1G12220	212.807	-0.223915	0.384717	-0.582025	0.56055	0.788767	271.352	271.658	143.597	271.483	149.843	168.909
AT1G12230	1127.22	0.629325	0.23371	2.69276	0.00708642	0.0507401	704.389	974.179	975.195	1696.77	1053.67	1359.1
AT1G12240	4316.01	-0.770132	0.223593	-3.44435	0.000572432	0.00750319	5394.7	5897.51	5036.93	2500.77	4515.33	2550.85
AT1G12244	404.613	0.53503	0.267935	1.99686	0.0458402	0.183272	293.847	397.379	299.028	563.849	424.714	448.861
AT1G12250	1338.1	0.308657	0.188146	1.64052	0.100896	0.302985	1300.52	1065.15	1222.15	1329.57	1591.01	1520.18
AT1G12260	0	NA	NA	NA	NA	NA	0	0	0	0	0	0
AT1G12270	564.434	0.224575	0.236145	0.951003	0.341603	0.611797	425.305	578.695	557.029	652.603	558.331	614.643
AT1G12280	181.615	1.02365	0.357956	2.85972	0.0042402	0.0346562	96.3087	158.573	104.147	261.041	249.102	220.521
AT1G12290	185.152	0.970853	0.419987	2.31163	0.0207983	0.108546	184.182	96.028	95.4681	144.443	274.871	315.923
AT1G12294	0	NA	NA	NA	NA	NA	0	0	0	0	0	0
AT1G12300	52.9104	-0.10607	0.845201	-0.125497	0.90013	0.963756	48.5059	109.295	6.31194	90.4942	36.2677	26.5876
AT1G12310	479.35	-0.515246	0.308826	-1.6684	0.0952356	0.293028	355.007	756.221	582.277	337.613	491.523	353.459
AT1G12320	18.9218	0.00826149	1.55723	0.00530526	0.995767	0.999021	34.4462	0	22.0918	0	3.81765	53.1752
AT1G12330	61.7627	-2.28351	0.769477	-2.96762	0.00300115	0.0267039	97.7147	141.515	69.4313	17.4027	42.9486	1.56398
AT1G12340	1.70715	-2.5328	3.92595	-0.645141	0.518836	NA	0	0	8.67892	0	0	1.56398
AT1G12350	812.836	0.161946	0.216834	0.746868	0.455143	0.709828	857.64	783.387	661.176	737.876	887.604	949.334
AT1G12360	1687.29	0.829617	0.20714	4.0051	6.2e-05	0.00125126	1091.03	1479.59	1075.4	1783.78	2430.89	2263.07
AT1G12370	50.7021	0.0823402	0.660126	0.124734	0.900734	0.963924	19.6835	56.2269	71.7983	60.9096	48.6751	46.9193
AT1G12380	6.10323	-4.59817	2.14602	-2.14265	0.0321414	0.145686	15.4656	1.26353	18.9358	0	0.954413	0
AT1G12390	292.125	-0.106223	0.295714	-0.359209	0.719439	0.88234	378.205	276.081	254.845	261.041	307.321	275.26
AT1G12400	329.684	-0.253592	0.266667	-0.950971	0.341619	0.611797	351.492	341.784	383.45	268.002	333.09	300.283
AT1G12410	976.946	-0.133168	0.224494	-0.593193	0.553052	0.783807	911.067	852.881	1303.42	868.397	1007.86	918.054
AT1G12411	0.920491	-2.8579	3.94089	-0.725191	0.468335	NA	0	0	5.52295	0	0	0
AT1G12420	52.1746	-1.70939	0.749601	-2.28039	0.0225843	0.11468	40.773	61.9128	136.496	17.4027	9.54413	46.9193
AT1G12423	0	NA	NA	NA	NA	NA	0	0	0	0	0	0
AT1G12430	98.714	0.478455	0.451067	1.06072	0.288818	0.557148	108.259	63.8081	75.7433	102.676	130.755	111.042
AT1G12440	1326.98	0.0767509	0.253049	0.303304	0.761658	0.904442	1271.7	1207.93	1392.57	1902.12	884.741	1302.79
AT1G12450	103.538	-0.392857	0.454595	-0.864191	0.387483	0.654361	89.9819	99.8186	163.321	76.572	99.2589	92.2746
AT1G12451	0.521325	2.98828	4.02655	0.742144	0.458	NA	0	0	0	0	0	3.12795
AT1G12460	38.8208	0.587048	0.689076	0.851935	0.39425	0.661246	28.1193	27.7976	37.0827	67.8707	43.903	28.1516
AT1G12470	179.732	0.489626	0.39566	1.23749	0.215904	0.473736	188.4	101.714	157.799	290.626	158.433	181.421
AT1G12480	8.12373	-0.197165	1.77717	-0.110943	0.911661	0.968262	0.702983	25.2705	0	10.4416	7.6353	4.69193
AT1G12490	0	NA	NA	NA	NA	NA	0	0	0	0	0	0
AT1G12500	568.049	-1.49163	0.224649	-6.63982	3.14e-11	4.53e-09	852.016	895.841	766.901	295.847	313.047	284.644
AT1G12510	0.920491	-2.8579	3.94089	-0.725191	0.468335	NA	0	0	5.52295	0	0	0
AT1G12520	2302.58	0.584831	0.187032	3.1269	0.00176658	0.0180754	1870.64	1746.19	1908.57	2584.31	2352.63	3353.17
AT1G12530	278.04	0.375458	0.332588	1.1289	0.258941	0.523713	321.263	155.414	250.111	294.106	345.497	301.847
AT1G12540	0	NA	NA	NA	NA	NA	0	0	0	0	0	0
AT1G12550	223.506	-0.657251	0.381975	-1.72067	0.0853113	0.2733	359.928	205.323	257.212	146.183	251.965	120.426
AT1G12560	0.820147	-2.69793	3.94487	-0.683907	0.494034	NA	4.92088	0	0	0	0	0
AT1G12570	0.837207	0.688434	3.94894	0.174334	0.861603	NA	0	1.89529	0	0	0	3.12795
AT1G12580	2001.34	0.0357997	0.167292	0.213996	0.830551	0.935947	1928.28	2062.71	1936.98	2154.46	1865.88	2059.76
AT1G12590	2.62779	-2.04361	3.01929	-0.676849	0.498502	NA	6.32685	0	6.31194	0	0	3.12795
AT1G12600	22.5192	-1.26015	0.885498	-1.42309	0.154709	0.390424	47.8029	21.48	26.0368	13.9222	13.3618	12.5118
AT1G12610	2507.1	-1.13533	0.215693	-5.26361	1.41e-07	7.19e-06	2688.21	4636.51	3012.37	1470.53	1605.32	1629.66
AT1G12620	127.829	0.542517	0.385788	1.40626	0.159647	0.397149	92.7938	97.2916	122.294	151.404	154.615	148.578
AT1G12630	1.05199	-3.05129	3.93663	-0.775103	0.438279	NA	0	0	6.31194	0	0	0
AT1G12640	307.445	-0.51273	0.351587	-1.45833	0.14475	0.376193	341.65	461.819	282.459	252.34	353.133	153.27
AT1G12650	291.978	0.39503	0.299431	1.31927	0.187079	0.436752	318.452	202.796	235.909	297.587	348.361	348.767
AT1G12660	1.30314	-3.36534	3.93081	-0.856145	0.391917	NA	7.02983	0	0.788993	0	0	0
AT1G12663	0	NA	NA	NA	NA	NA	0	0	0	0	0	0
AT1G12665	0	NA	NA	NA	NA	NA	0	0	0	0	0	0
AT1G12667	0	NA	NA	NA	NA	NA	0	0	0	0	0	0
AT1G12669	0	NA	NA	NA	NA	NA	0	0	0	0	0	0
AT1G12670	0	NA	NA	NA	NA	NA	0	0	0	0	0	0
AT1G12672	6.82418	3.29045	1.97639	1.66488	0.0959358	0.293879	0.702983	0	3.15597	0	10.4985	26.5876
AT1G12680	308.53	-0.0399306	0.294975	-0.135369	0.89232	0.961293	253.074	283.03	402.386	302.808	293.959	315.923
AT1G12700	63.7106	1.27313	0.641936	1.98327	0.0473377	0.187067	29.5253	64.4399	17.3578	130.521	54.4015	86.0187
AT1G12710	143.637	0.973523	0.467175	2.08385	0.0371738	0.160231	78.0312	76.4434	135.707	281.924	97.3501	192.369
AT1G12720.1	0	NA	NA	NA	NA	NA	0	0	0	0	0	0
AT1G12725.1	0	NA	NA	NA	NA	NA	0	0	0	0	0	0
AT1G12730	197.931	0.611483	0.327977	1.86441	0.0622648	0.223965	159.577	129.512	180.679	243.638	222.378	251.8
AT1G12740	2.91779	-3.41592	2.93684	-1.16313	0.244778	0.50831	0	5.68587	10.2569	0	0	1.56398
AT1G12750	877.096	0.458538	0.224794	2.03981	0.041369	0.171838	682.597	603.966	931.011	998.917	1067.03	979.049
AT1G12760	1151.22	0.186794	0.206986	0.902446	0.36682	0.63641	934.265	1085.37	1212.68	1033.72	1401.08	1240.23
AT1G12770	228.79	-0.11618	0.331993	-0.349946	0.726379	0.886138	251.668	231.857	231.964	189.69	293.959	173.601
AT1G12775	72.3438	0.113731	0.555125	0.204876	0.837669	0.939387	84.358	44.2234	80.4772	76.572	103.077	45.3553
AT1G12780	1049.14	0.0805044	0.202134	0.398273	0.690429	0.867922	915.987	1046.83	1095.91	1028.5	961.094	1246.49
AT1G12790	116.734	0.627385	0.552671	1.13519	0.256297	0.521509	37.9611	108.032	128.606	234.937	78.2618	112.606
AT1G12800	610.991	-0.200453	0.218346	-0.918052	0.358592	0.629226	635.497	632.395	693.524	532.524	630.867	541.136
AT1G12805	0	NA	NA	NA	NA	NA	0	0	0	0	0	0
AT1G12810	226.575	-0.123328	0.304665	-0.404797	0.685627	0.864898	256.589	220.485	231.175	238.417	198.518	214.265
AT1G12820	574.287	-0.251931	0.2462	-1.02328	0.306177	0.573844	546.921	734.741	589.377	614.317	433.303	527.06
AT1G12830	320.738	0.26713	0.295487	0.904034	0.365977	0.63554	277.678	229.962	365.304	393.302	301.594	356.587
AT1G12840	1233.52	-0.642062	0.227312	-2.82458	0.0047342	0.0376327	1471.34	1816.95	1224.52	755.279	1141.48	991.561
AT1G12845	24.6137	-1.31473	0.971886	-1.35276	0.176131	0.421718	30.2283	9.47645	65.4864	10.4416	8.58971	23.4596
AT1G12850	380.737	0.388924	0.301216	1.29118	0.196641	0.449886	241.123	388.535	358.203	506.42	317.819	472.321
AT1G12855	0	NA	NA	NA	NA	NA	0	0	0	0	0	0
AT1G12860	335.946	0.462762	0.275199	1.68155	0.0926555	0.287777	269.946	335.466	241.432	429.848	363.631	375.354
AT1G12870	2.5032	4.25812	3.41613	1.24647	0.21259	NA	0.702983	0	0	0	14.3162	0
AT1G12880	270.732	2.42726	0.337721	7.18718	6.61e-13	1.46e-10	120.21	66.3352	67.8534	516.861	380.811	472.321
AT1G12890	7.01058	4.75562	1.91241	2.48671	0.0128929	0.0778505	0	0	1.57799	13.9222	17.1794	9.38386
AT1G12900	4843.12	0.0188593	0.174033	0.108366	0.913705	0.968934	4153.23	5446.43	4834.16	5431.39	4906.64	4286.86
AT1G12910	723.909	0.124813	0.238386	0.523576	0.600574	0.8148	550.436	872.465	654.075	831.851	716.764	717.865
AT1G12920	636.644	-0.539797	0.256437	-2.10499	0.0352925	0.15502	726.885	798.549	740.075	499.459	679.542	375.354
AT1G12930	237.423	-0.275158	0.383452	-0.717581	0.473016	0.72386	253.074	212.273	316.386	200.131	320.683	121.99
AT1G12935.1	0	NA	NA	NA	NA	NA	0	0	0	0	0	0
AT1G12938	0.702983	-2.4756	3.95119	-0.626545	0.530957	NA	4.2179	0	0	0	0	0
AT1G12940	0	NA	NA	NA	NA	NA	0	0	0	0	0	0
AT1G12950	0	NA	NA	NA	NA	NA	0	0	0	0	0	0
AT1G12960	0	NA	NA	NA	NA	NA	0	0	0	0	0	0
AT1G12970	381.927	-0.279487	0.320076	-0.873192	0.382558	0.650622	243.935	494.671	517.579	327.171	318.774	389.43
AT1G12980	0.870137	3.72098	3.97947	0.935044	0.349766	NA	0	0	0	5.22082	0	0
AT1G12990	569.859	0.0475898	0.243753	0.195238	0.845207	0.94232	573.635	549.634	558.607	659.564	641.365	436.349
AT1G13000	428.172	0.590731	0.29306	2.01574	0.0438274	0.177599	357.819	348.733	317.964	403.743	410.397	730.377
AT1G13010	1.07203	4.03478	3.96541	1.0175	0.308918	NA	0	0	0	1.74027	0	4.69193
AT1G13020	130.492	0.755448	0.4394	1.71927	0.0855648	0.273813	60.4566	136.461	94.6791	144.443	206.153	140.758
AT1G13030	54.3927	-0.297819	0.634829	-0.469133	0.638975	0.837808	68.1894	73.9163	37.0827	71.3512	25.7691	50.0472
AT1G13040	19.2621	0.961586	1.02822	0.935194	0.349688	0.620084	14.7627	2.52705	22.0918	24.3638	31.4956	20.3317
AT1G13050	48.5969	-1.86111	0.658309	-2.82711	0.00469706	0.0374193	101.23	82.1293	45.7616	19.143	27.678	15.6398
AT1G13060	532.62	0.784271	0.251219	3.12186	0.00179712	0.0183147	315.64	494.039	363.726	710.032	658.545	653.742
AT1G13070	0.954413	3.91163	3.97057	0.985156	0.324547	NA	0	0	0	0	5.72648	0
AT1G13080	281.536	-0.648078	0.337871	-1.91812	0.0550956	0.206636	475.217	283.662	271.413	210.573	174.658	273.696
AT1G13090	646.869	-0.460078	0.231722	-1.98547	0.0470919	0.186289	889.274	660.193	696.68	600.394	481.024	553.648
AT1G13100	303.469	-1.70954	0.320129	-5.34018	9.29e-08	4.98e-06	527.238	349.997	516.001	186.209	124.074	117.298
AT1G13110	2139.87	-1.0491	0.204794	-5.1227	3.01e-07	1.36e-05	3479.07	2224.44	2950.83	1554.06	1243.6	1387.25
AT1G13120	420.533	0.406915	0.310298	1.31137	0.189734	0.440332	443.583	210.377	431.579	447.25	508.702	481.705
AT1G13130	0	NA	NA	NA	NA	NA	0	0	0	0	0	0
AT1G13140	17.7251	-0.660169	1.60654	-0.410927	0.681126	0.862718	0	65.0716	0	19.143	14.3162	7.81988
AT1G13145	60.8897	-2.03254	0.616098	-3.29905	0.000970129	0.0114812	75.2192	146.569	72.5873	15.6625	33.4044	21.8957
AT1G13150	187.981	1.13432	0.377182	3.00734	0.00263541	0.0242942	80.1401	138.988	133.34	268.002	189.928	317.487
AT1G13160	91.9236	-0.780954	0.523719	-1.49117	0.135917	0.362297	140.597	134.566	72.5873	66.1304	39.1309	98.5305
AT1G13170	34.6316	-0.401032	0.807642	-0.496547	0.619509	0.826675	68.8924	18.3211	31.5597	15.6625	46.7662	26.5876
AT1G13180	106.996	-0.549197	0.473391	-1.16013	0.245994	0.509648	160.983	101.082	119.927	48.7277	100.213	111.042
AT1G13190	371.946	-0.172171	0.278034	-0.619244	0.535756	0.771383	406.324	355.051	422.9	292.366	443.802	311.231
AT1G13195	262.833	0.681119	0.370863	1.83658	0.0662721	0.232916	241.826	208.482	156.221	172.287	405.625	392.558
AT1G13200	2.33738	2.42042	2.89192	0.836961	0.402614	NA	1.40597	0	0.788993	8.70137	0	3.12795
AT1G13210	1604.13	0.369061	0.232112	1.59001	0.111832	0.323123	1618.97	1150.44	1433.6	1353.93	2363.13	1704.73
AT1G13220	1176.52	0.938742	0.221305	4.24185	2.22e-05	0.000522907	804.213	878.151	736.919	1308.69	1332.36	1998.76
AT1G13230	3.73243	-4.88306	2.89793	-1.68502	0.0919855	0.286484	16.8716	0	5.52295	0	0	0
AT1G13240	0.117164	0.00155855	4.08047	0.000381954	0.999695	NA	0.702983	0	0	0	0	0
AT1G13245	2402.71	-0.201503	0.198934	-1.01291	0.311103	0.579257	2788.03	2581.39	2338.57	2831.43	1903.1	1973.74
AT1G13250	151.567	-0.544213	0.471008	-1.15542	0.247918	0.511731	168.013	184.475	185.413	222.755	65.8545	82.8907
AT1G13260	2406.87	-1.97429	0.193578	-10.1989	2e-24	3.73e-21	3732.14	4579.65	3197	1082.45	864.698	985.305
AT1G13270	196.086	0.664521	0.365465	1.81829	0.0690198	0.239999	140.597	156.046	157.799	344.574	202.336	175.165
AT1G13280	197.189	-0.13845	0.398588	-0.347351	0.728327	0.887183	188.4	272.922	157.01	252.34	110.712	201.753
AT1G13290	0	NA	NA	NA	NA	NA	0	0	0	0	0	0
AT1G13300	110.906	-0.0506662	0.508546	-0.0996294	0.920639	0.971058	99.1207	58.754	181.468	74.8318	135.527	115.734
AT1G13310	6.69663	-0.321174	1.89705	-0.169302	0.865559	0.950773	0.702983	21.48	0	10.4416	2.86324	4.69193
AT1G13320	602.094	0.415199	0.2233	1.85938	0.062974	0.225591	456.236	501.62	590.166	706.551	660.454	697.533
AT1G13330	9.616	-1.10702	1.37255	-0.806544	0.419929	0.682782	4.2179	27.1658	7.88993	5.22082	3.81765	9.38386
AT1G13340	163.713	-0.156605	0.537828	-0.29118	0.770914	0.909355	94.1998	271.658	150.698	170.547	49.6295	245.544
AT1G13350	2123.75	0.720404	0.179211	4.01988	5.82e-05	0.00119098	1739.18	1516.23	1558.26	2253.65	2763.02	2912.12
AT1G13360	1265.45	-1.3291	0.667475	-1.99124	0.0464549	0.18488	1814.4	2014.06	1604.02	422.887	1401.08	336.255
AT1G13370	3.18406	0.193326	2.57478	0.0750845	0.940147	0.97834	0	2.52705	6.31194	8.70137	0	1.56398
AT1G13380	253.051	0.275271	0.326054	0.844248	0.398531	0.66521	158.171	252.074	276.936	247.119	280.597	303.411
AT1G13390	4553.03	-0.220307	0.243203	-0.905855	0.365013	0.634511	5870.61	4579.65	4253.46	2685.24	5858.19	4071.03
AT1G13400	0.58582	-2.21265	3.96	-0.558749	0.576333	NA	3.51492	0	0	0	0	0
AT1G13410	9.52471	0.87996	1.50065	0.586388	0.557615	0.786593	3.51492	5.68587	11.0459	0	18.1338	18.7677
AT1G13420	0.394496	-1.62795	3.98632	-0.408383	0.682993	NA	0	0	2.36698	0	0	0
AT1G13430	0.521325	2.98828	4.02655	0.742144	0.458	NA	0	0	0	0	0	3.12795
AT1G13440	6553.91	-0.339023	0.174926	-1.93809	0.0526124	0.200844	7460.06	7565.37	6932.09	6870.6	4719.57	5775.76
AT1G13448	36.5336	0.893383	0.742222	1.20366	0.228721	0.488813	30.9313	20.2164	25.2478	53.9485	20.0427	68.815
AT1G13450	633.847	0.131258	0.264972	0.495364	0.620343	0.827041	611.596	458.029	746.387	509.9	679.542	797.628
AT1G13460	314.011	-0.816655	0.311667	-2.62028	0.00878568	0.0595623	434.444	492.144	274.569	257.561	220.469	204.881
AT1G13470	11.2442	0.595554	1.70743	0.348801	0.727239	0.886367	10.5448	4.42234	11.8349	0	0	40.6634
AT1G13480	1.04265	3.99744	3.96693	1.00769	0.313602	NA	0	0	0	0	0	6.25591
AT1G13485	0	NA	NA	NA	NA	NA	0	0	0	0	0	0
AT1G13490	0.820147	-2.69793	3.94487	-0.683907	0.494034	NA	4.92088	0	0	0	0	0
AT1G13500	0.131499	0.00155855	4.08047	0.000381954	0.999695	NA	0	0	0.788993	0	0	0
AT1G13510	0	NA	NA	NA	NA	NA	0	0	0	0	0	0
AT1G13520	20.5236	-1.23645	0.95362	-1.29659	0.194774	0.447313	23.9014	45.487	17.3578	10.4416	18.1338	7.81988
AT1G13530	34.5362	2.00047	1.01245	1.97586	0.0481704	0.189261	0	27.1658	14.2019	38.286	52.4927	75.0709
AT1G13540	11.6941	0.539748	1.68345	0.32062	0.748499	0.898023	0	18.9529	9.46791	26.1041	0	15.6398
AT1G13550	13.4511	-0.067265	1.30892	-0.0513896	0.959015	0.984668	11.2477	12.6353	17.3578	26.1041	13.3618	0
AT1G13560	3424.64	0.530771	0.179719	2.95333	0.00314364	0.0277306	2388.74	3162.61	2853	3746.81	3764.2	4632.5
AT1G13570	217.709	0.281586	0.329489	0.854612	0.392766	0.659733	173.637	168.681	246.955	250.599	205.199	261.184
AT1G13580	156.951	0.827685	0.37776	2.19104	0.0284493	0.134133	143.409	90.9739	104.936	175.768	184.202	242.416
AT1G13590	0.697255	2.16258	4.01598	0.538494	0.590236	NA	0.702983	0	0	3.48055	0	0
AT1G13600	0	NA	NA	NA	NA	NA	0	0	0	0	0	0
AT1G13605	0	NA	NA	NA	NA	NA	0	0	0	0	0	0
AT1G13607	0	NA	NA	NA	NA	NA	0	0	0	0	0	0
AT1G13608	4.40687	6.079	2.72822	2.22819	0.0258678	0.12583	0	0	0	22.6236	3.81765	0
AT1G13609	5.18236	-0.164565	2.10996	-0.0779943	0.937833	0.977715	7.02983	0	9.46791	6.96109	7.6353	0
AT1G13610	4.11025	-3.95269	2.64846	-1.49245	0.135582	0.361681	17.5746	0	5.52295	0	0	1.56398
AT1G13620	0.377827	0.980902	4.07804	0.240533	0.809917	NA	0.702983	0	0	0	0	1.56398
AT1G13630	6.59561	-0.133101	2.05058	-0.0649088	0.948247	0.98093	11.9507	0	8.67892	1.74027	0	17.2037
AT1G13635	2.65038	-1.21534	2.76823	-0.439031	0.660639	NA	9.13879	1.89529	0	1.74027	0	3.12795
AT1G13640	318.212	-0.555351	0.300743	-1.8466	0.0648055	0.229674	297.362	413.805	423.689	321.951	214.743	237.724
AT1G13650	412.586	-0.160752	0.264319	-0.608176	0.543071	0.777052	359.928	512.992	433.946	415.925	418.033	334.691
AT1G13660.1	0.680394	3.39088	3.99785	0.848174	0.396341	NA	0	0	0	0	0.954413	3.12795
AT1G13670	0.117164	0.00155855	4.08047	0.000381954	0.999695	NA	0.702983	0	0	0	0	0
AT1G13680	0.234328	-0.89133	4.03841	-0.220713	0.825316	NA	1.40597	0	0	0	0	0
AT1G13690	346.607	0.586006	0.318584	1.83941	0.0658552	0.232149	205.271	225.54	400.808	403.743	375.084	469.193
AT1G13700	1313.32	0.598442	0.29119	2.05516	0.039864	0.167937	664.319	1298.27	1170.08	1668.92	976.364	2101.98
AT1G13710	0.58582	-2.21265	3.96	-0.558749	0.576333	NA	3.51492	0	0	0	0	0
AT1G13720	0	NA	NA	NA	NA	NA	0	0	0	0	0	0
AT1G13730	143.933	-0.401198	0.371602	-1.07964	0.280301	0.548073	149.032	181.948	160.954	104.416	137.435	129.81
AT1G13740	319.311	0.202337	0.435342	0.464777	0.642091	0.839046	220.034	188.897	483.652	153.144	518.246	351.895
AT1G13750	109.571	-1.22114	0.499416	-2.44514	0.0144797	0.084461	167.31	164.89	126.239	97.4553	29.5868	71.9429
AT1G13755	0.394496	-1.62795	3.98632	-0.408383	0.682993	NA	0	0	2.36698	0	0	0
AT1G13760	0	NA	NA	NA	NA	NA	0	0	0	0	0	0
AT1G13770	166.224	0.0621539	0.388713	0.159896	0.872963	0.953585	186.994	161.731	138.863	127.04	140.299	242.416
AT1G13780	68.0509	-0.700578	0.55761	-1.2564	0.208972	0.465966	78.0312	96.6598	78.1103	29.5847	47.7206	78.1988
AT1G13790	20.7486	-1.92381	1.15135	-1.67091	0.0947399	0.291905	33.7432	27.7976	37.8716	0	21.9515	3.12795
AT1G13800	6.33995	-5.64957	2.225	-2.53913	0.0111129	0.0701404	1.40597	27.1658	9.46791	0	0	0
AT1G13810	57.109	-1.40956	0.882118	-1.59792	0.11006	0.320264	138.488	59.3858	52.0735	0	62.9912	29.7156
AT1G13820	524.171	-0.160422	0.245186	-0.654286	0.512927	0.75443	575.04	594.489	490.753	541.225	547.833	395.686
AT1G13830	5.57497	1.07752	2.1443	0.502504	0.615313	0.824408	7.73282	0	3.15597	0	20.9971	1.56398
AT1G13840	0.117164	0.00155855	4.08047	0.000381954	0.999695	NA	0.702983	0	0	0	0	0
AT1G13850	0	NA	NA	NA	NA	NA	0	0	0	0	0	0
AT1G13860	84.4614	-0.681363	0.599629	-1.13631	0.255828	0.521028	63.9715	132.039	117.56	31.3249	121.21	40.6634
AT1G13870	111.271	0.637773	0.423608	1.50557	0.132176	0.356639	76.6252	83.3928	100.991	170.547	125.028	111.042
AT1G13880	537.089	-0.550242	0.273447	-2.01224	0.0441946	0.178646	513.881	756.853	646.185	400.263	565.967	339.383
AT1G13890	2.10895	-4.06023	3.92163	-1.03534	0.300509	NA	12.6537	0	0	0	0	0
AT1G13900	87.2354	0.586936	0.49836	1.17774	0.238902	0.501348	74.5162	63.1763	71.7983	125.3	130.755	57.8671
AT1G13910	211.12	-0.0468456	0.403329	-0.116147	0.907536	0.966723	167.31	252.074	225.652	193.17	315.911	112.606
AT1G13920	85.6567	-1.13052	0.520854	-2.17051	0.029968	0.138627	140.597	90.3422	120.716	74.8318	29.5868	57.8671
AT1G13930	2311.35	-0.975167	0.183141	-5.32467	1.01e-07	5.35e-06	2899.81	3119.02	3174.91	1675.88	1733.21	1265.26
AT1G13940	93.2252	0.101622	0.465044	0.218521	0.827024	0.934206	83.655	85.2881	100.202	127.04	67.7633	95.4026
AT1G13950	345.754	0.822884	0.304296	2.70422	0.00684644	0.049631	169.419	262.182	317.964	468.134	470.525	386.302
AT1G13960	341.16	-0.0332861	0.312366	-0.106561	0.915137	0.969525	286.817	286.821	463.139	311.509	421.85	276.824
AT1G13970	13.2065	-4.01621	1.74171	-2.30589	0.0211167	0.109732	0	53.0681	21.3028	1.74027	0	3.12795
AT1G13980	118.726	0.220413	0.452559	0.487036	0.626232	0.829942	73.8133	97.9233	157.01	165.326	108.803	109.478
AT1G13990	701.317	0.77718	0.255977	3.03613	0.00239632	0.0227246	591.209	418.227	542.827	647.382	1087.08	921.182
AT1G14000	539.573	0.152199	0.251726	0.604623	0.54543	0.778396	470.296	644.399	418.955	551.667	620.368	531.752
AT1G14010	499.756	0.611523	0.245739	2.48851	0.0128281	0.077648	351.492	436.549	399.23	511.64	705.311	594.311
AT1G14020	162.748	0.178616	0.477021	0.374441	0.708076	0.876796	71.0013	233.121	154.643	156.625	250.056	111.042
AT1G14030	1216.41	0.0293936	0.2157	0.136271	0.891607	0.961201	990.504	1477.06	1144.04	1373.08	1250.28	1063.5
AT1G14040	20.6541	-0.76369	0.994151	-0.768183	0.442379	0.699727	38.6641	17.0576	22.8808	6.96109	30.5412	7.81988
AT1G14048	0.131499	0.00155855	4.08047	0.000381954	0.999695	NA	0	0	0.788993	0	0	0
AT1G14060	61.5711	-0.365972	0.6147	-0.595366	0.551599	0.782907	44.9909	42.9599	119.927	59.1693	42.9486	59.4311
AT1G14070	93.0302	-0.859576	0.632076	-1.35992	0.173854	0.417927	206.677	104.873	48.1285	104.416	70.6265	23.4596
AT1G14071	5.86214	-3.65838	2.01513	-1.81546	0.0694533	0.241056	24.6044	2.52705	5.52295	0	0.954413	1.56398
AT1G14080	0	NA	NA	NA	NA	NA	0	0	0	0	0	0
AT1G14090	24.266	-0.145621	0.815106	-0.178653	0.85821	0.947785	28.1193	27.7976	20.5138	24.3638	22.9059	21.8957
AT1G14100	0.40721	0.980902	4.07804	0.240533	0.809917	NA	0.702983	0	0	1.74027	0	0
AT1G14110	0	NA	NA	NA	NA	NA	0	0	0	0	0	0
AT1G14120	19.1766	-0.78368	1.36225	-0.575282	0.565101	0.79199	60.4566	8.84469	3.15597	19.143	0	23.4596
AT1G14130	204.238	-0.168593	0.393699	-0.428229	0.668484	0.854555	160.983	209.114	280.092	123.559	279.643	172.037
AT1G14140	387.984	-0.113777	0.259347	-0.438707	0.660874	0.8506	364.145	470.032	374.771	407.224	342.634	369.098
AT1G14150	691.847	-0.0817321	0.228503	-0.357684	0.72058	0.882893	605.972	818.134	710.882	696.109	744.442	575.543
AT1G14160	0.636275	3.3407	4.00102	0.834963	0.403739	NA	0	0	0	0	3.81765	0
AT1G14170	10.718	-0.423008	1.41194	-0.299594	0.764487	0.905721	25.3074	1.89529	9.46791	6.96109	1.90883	18.7677
AT1G14180	23.4991	-1.07762	1.00855	-1.06848	0.285303	0.553519	18.2776	65.0716	11.8349	19.143	4.77206	21.8957
AT1G14182	9.63234	-1.65352	1.42388	-1.16128	0.245528	0.509136	10.5448	4.42234	29.1927	3.48055	8.58971	1.56398
AT1G14185	70.4728	-0.827321	0.596478	-1.38701	0.165438	0.405797	61.1596	104.873	103.358	87.0137	25.7691	40.6634
AT1G14190	9.61323	-0.845211	1.38077	-0.61213	0.540451	0.77444	2.81193	12.0035	22.0918	6.96109	2.86324	10.9478
AT1G14200	617.808	-0.547277	0.268994	-2.03453	0.0418979	0.17298	605.269	822.556	770.846	511.64	352.178	644.358
AT1G14205	65.3014	1.84007	0.611667	3.00828	0.00262727	0.0242421	33.0402	26.5341	26.0368	41.7666	100.213	164.218
AT1G14210	188.646	0.228934	0.382804	0.598045	0.54981	0.781615	234.093	118.14	169.633	149.664	236.694	223.649
AT1G14220	0	NA	NA	NA	NA	NA	0	0	0	0	0	0
AT1G14225	0	NA	NA	NA	NA	NA	0	0	0	0	0	0
AT1G14230	136.85	-0.538185	0.38926	-1.38258	0.166792	0.407786	152.547	145.937	186.991	130.521	87.806	117.298
AT1G14240	0	NA	NA	NA	NA	NA	0	0	0	0	0	0
AT1G14250	174.373	-1.53701	0.418289	-3.67452	0.000238296	0.00372717	275.57	193.951	310.863	57.429	136.481	71.9429
AT1G14260	3.7181	-0.683057	2.46587	-0.277005	0.781777	0.913611	0	1.26353	12.6239	1.74027	6.68089	0
AT1G14270	1991.12	0.60803	0.171492	3.54554	0.000391811	0.00554791	1611.94	1607.84	1512.5	2664.36	2374.58	2175.49
AT1G14280	528.509	-0.269545	0.372574	-0.723467	0.469393	0.720742	529.347	420.754	781.103	810.968	251.965	376.918
AT1G14290	426.749	0.58924	0.297981	1.97744	0.0479919	0.188705	352.898	237.543	431.579	643.901	445.711	448.861
AT1G14300	98.8369	-0.242504	0.538267	-0.450527	0.65233	0.84571	118.804	56.2269	147.542	55.6888	141.253	73.5069
AT1G14310	258.123	-0.0638804	0.301381	-0.211959	0.832139	0.936747	219.331	270.395	302.184	221.015	260.555	275.26
AT1G14315	1.45023	4.46771	3.95032	1.13097	0.258066	NA	0	0	0	8.70137	0	0
AT1G14320	6105.6	-0.209441	0.164703	-1.27163	0.203506	0.458722	6622.1	6963.3	6057.88	6388.54	5711.21	4890.55
AT1G14330	328.46	-0.337449	0.318299	-1.06016	0.28907	0.55724	452.721	267.868	381.083	269.742	374.13	225.213
AT1G14340	168.906	0.786556	0.417069	1.88592	0.0593062	0.216871	149.735	79.6022	142.019	236.677	131.709	273.696
AT1G14345	798.59	-0.113288	0.241085	-0.469908	0.638421	0.837618	778.203	859.83	850.534	1007.62	711.992	583.363
AT1G14350	57.8249	-1.69593	0.755051	-2.24611	0.024697	0.121872	119.507	101.082	43.3946	60.9096	9.54413	12.5118
AT1G14360	54.2007	-0.656358	0.659432	-0.995338	0.319572	0.588286	105.448	41.6964	52.0735	52.2082	53.4471	20.3317
AT1G14370	287.213	0.771807	0.341956	2.25703	0.024006	0.119732	248.856	192.056	194.881	306.288	251.011	530.188
AT1G14380	169.399	0.282744	0.346476	0.816055	0.414469	0.678471	163.795	156.046	138.863	156.625	189.928	211.137
AT1G14390	18.7525	-1.16922	1.18247	-0.98879	0.322766	0.591877	2.81193	8.84469	66.2754	12.1819	11.453	10.9478
AT1G14400	1085	0.0915566	0.220751	0.414751	0.678325	0.861005	940.592	1187.08	1021.75	1392.22	909.555	1058.81
AT1G14410	269.705	-0.257159	0.322164	-0.798222	0.424741	0.686565	377.502	243.861	258.79	306.288	212.834	218.957
AT1G14420	0.260663	1.94267	4.07804	0.476374	0.633808	NA	0	0	0	0	0	1.56398
AT1G14430	34.7824	-0.132152	0.700827	-0.188566	0.850433	0.943906	37.2581	29.0611	42.6056	41.7666	26.7236	31.2795
AT1G14440	3.24724	-3.00267	3.16949	-0.947367	0.343452	0.613544	17.5746	0	0	0	1.90883	0
AT1G14450	641.82	-0.321185	0.22828	-1.40698	0.159434	0.397111	687.518	777.069	676.167	515.121	680.496	514.548
AT1G14455	3.55544	-4.81243	2.93232	-1.64117	0.100762	0.302834	12.6537	0	8.67892	0	0	0
AT1G14460	24.9421	1.505	0.971081	1.54982	0.121184	0.339042	4.92088	25.9023	7.88993	69.6109	20.9971	20.3317
AT1G14470	2.52927	1.13383	3.3893	0.334532	0.737978	NA	0	0	4.73396	10.4416	0	0
AT1G14480	28.0718	0.987709	0.818042	1.20741	0.227276	0.486752	25.3074	10.1082	21.3028	34.8055	53.4471	23.4596
AT1G14490	9.54049	-2.37383	1.9836	-1.19673	0.231412	0.492048	34.4462	0	13.4129	0	0	9.38386
AT1G14500	0.989981	0.13411	3.91779	0.034231	0.972693	NA	2.81193	0	0	0	0	3.12795
AT1G14510	303.955	0.02506	0.334511	0.0749155	0.940282	0.978347	285.411	248.283	370.827	198.391	306.366	414.454
AT1G14518	0.655159	-0.648592	3.98383	-0.162806	0.870671	NA	0	0	2.36698	0	0	1.56398
AT1G14520	556.143	1.45781	0.326	4.4718	7.76e-06	0.000217544	166.607	308.932	415.01	701.33	664.271	1080.71
AT1G14530	184.597	1.41917	0.464518	3.05514	0.00224952	0.0216533	64.6745	84.0245	153.065	135.741	246.238	423.838
AT1G14540	188.723	-0.73982	0.459208	-1.61108	0.107163	0.314639	139.191	331.676	239.065	69.6109	221.424	131.374
AT1G14549	0	NA	NA	NA	NA	NA	0	0	0	0	0	0
AT1G14550	0	NA	NA	NA	NA	NA	0	0	0	0	0	0
AT1G14560	579.103	-0.140394	0.236981	-0.592428	0.553564	0.784155	707.904	526.259	587.01	529.043	497.249	627.155
AT1G14570	430.556	-0.419695	0.292821	-1.43328	0.151778	0.386168	536.376	514.255	430.001	257.561	501.067	344.075
AT1G14580	110.842	-0.506691	0.429251	-1.18041	0.237838	0.5	127.24	130.775	132.551	107.897	104.031	62.5591
AT1G14590	149.046	0.287868	0.438232	0.656886	0.511254	0.753335	159.577	113.086	130.973	80.0526	216.652	193.933
AT1G14600	222.87	0.981561	0.375017	2.61738	0.00886074	0.0598531	220.034	114.981	115.193	233.197	376.993	276.824
AT1G14610	527.103	0.391628	0.257834	1.51892	0.128784	0.351601	434.444	374.004	560.974	574.29	704.357	514.548
AT1G14620	116.314	0.383628	0.553716	0.692825	0.488419	0.736189	117.398	86.5516	97.8351	201.872	36.2677	157.962
AT1G14630	0	NA	NA	NA	NA	NA	0	0	0	0	0	0
AT1G14640	87.5399	0.852063	0.549617	1.55028	0.121073	0.338831	73.1103	45.487	69.4313	48.7277	172.749	115.734
AT1G14642	57.3448	0.0351387	0.585547	0.06001	0.952148	0.982526	48.5059	56.8587	64.6974	34.8055	56.3104	82.8907
AT1G14650	457.979	-0.0693142	0.291802	-0.237539	0.812239	0.927277	553.951	511.097	340.056	504.679	323.546	514.548
AT1G14660	176.014	0.489511	0.372406	1.31445	0.188693	0.438663	99.8237	155.414	184.624	177.508	233.831	204.881
AT1G14670	123.196	-0.267222	0.424167	-0.629994	0.528699	0.766872	106.853	131.407	166.477	90.4942	146.98	96.9665
AT1G14680	8.95174	0.6082	1.60841	0.378138	0.705328	0.875805	0	6.31763	14.9909	3.48055	8.58971	20.3317
AT1G14685	547.069	0.659128	0.265833	2.47948	0.0131572	0.0788356	310.719	528.786	432.368	659.564	578.374	772.604
AT1G14686	0	NA	NA	NA	NA	NA	0	0	0	0	0	0
AT1G14687	49.7651	-0.271628	0.736625	-0.368746	0.712317	0.879563	32.3372	22.7435	108.092	67.8707	36.2677	31.2795
AT1G14688	0	NA	NA	NA	NA	NA	0	0	0	0	0	0
AT1G14690	338.017	-0.049759	0.271406	-0.183338	0.854533	0.946177	355.71	367.686	306.918	375.899	282.506	339.383
AT1G14700	1535.57	-0.0763042	0.227865	-0.334866	0.737726	0.892111	1681.54	1474.54	1569.31	1952.59	1057.49	1477.96
AT1G14710	315.743	0.125726	0.290508	0.43278	0.665175	0.853222	298.768	351.892	254.056	393.302	275.825	320.615
AT1G14720	722.037	0.357167	0.218968	1.63113	0.102862	0.306907	658.696	528.154	712.46	870.137	785.482	777.296
AT1G14730	15.8466	-1.45852	1.27298	-1.14575	0.251897	0.516161	33.0402	18.9529	17.3578	6.96109	0	18.7677
AT1G14740	778.325	0.0883624	0.241684	0.365612	0.714655	0.8806	881.541	699.994	684.057	612.576	992.589	799.192
AT1G14750	8.62863	0.871044	1.78141	0.488963	0.624868	0.829209	0	8.84469	9.46791	19.143	14.3162	0
AT1G14755	0	NA	NA	NA	NA	NA	0	0	0	0	0	0
AT1G14760	0.262998	-1.03686	4.02598	-0.257542	0.79676	NA	0	0	1.57799	0	0	0
AT1G14770	112.109	-0.235135	0.432548	-0.543605	0.586713	0.807065	114.586	149.728	98.6241	107.897	78.2618	123.554
AT1G14780	103.304	-0.659018	0.509156	-1.29434	0.19555	0.448441	146.221	92.8692	140.441	41.7666	68.7177	129.81
AT1G14790	107.347	0.234043	0.456098	0.513143	0.607851	0.819406	110.368	126.984	58.3854	121.819	115.484	111.042
AT1G14800	1.66663	-2.496	3.92651	-0.635679	0.524985	NA	8.4358	0	0	0	0	1.56398
AT1G14810	198.799	0.463969	0.371456	1.24906	0.211644	0.469521	125.131	241.334	134.918	229.716	261.509	200.189
AT1G14820	205.398	-0.666857	0.379338	-1.75795	0.0787558	0.261519	282.599	291.875	181.468	109.637	143.162	223.649
AT1G14830	336.159	-0.0422486	0.284728	-0.148382	0.882041	0.95727	356.413	369.582	296.661	405.484	324.5	264.312
AT1G14840	169.018	0.229817	0.521637	0.440568	0.659526	0.850323	197.538	56.2269	212.239	276.704	86.8516	184.549
AT1G14850	95.0572	0.524928	0.499681	1.05053	0.293476	0.56145	80.8431	47.3823	105.725	146.183	113.575	76.6348
AT1G14860	79.7464	-1.35741	0.535063	-2.53691	0.0111836	0.070453	78.0312	123.194	142.019	52.2082	26.7236	56.3031
AT1G14870	544.069	-1.1936	0.295557	-4.03848	5.38e-05	0.00111827	982.771	784.018	506.533	262.781	417.078	311.231
AT1G14880	8.01716	-1.70562	1.91289	-0.891646	0.372583	0.641566	29.5253	0	7.10093	5.22082	0	6.25591
AT1G14890	16.5536	-3.50954	1.23249	-2.84752	0.00440613	0.0356284	15.4656	31.5882	44.1836	5.22082	2.86324	0
AT1G14900	30.0504	-0.41334	0.880127	-0.469637	0.638614	0.837713	61.1596	34.1152	7.88993	20.8833	34.3589	21.8957
AT1G14910	204.453	0.461437	0.357801	1.28965	0.197174	0.450652	149.735	238.175	127.817	215.794	226.196	269.004
AT1G14920	167.063	-0.890571	0.376532	-2.36519	0.0180207	0.0985984	236.202	184.475	231.964	100.936	156.524	92.2746
AT1G14930	0.262998	-1.03686	4.02598	-0.257542	0.79676	NA	0	0	1.57799	0	0	0
AT1G14940	0.781988	3.5793	3.98686	0.897773	0.369307	NA	0	0	0	0	0	4.69193
AT1G14950	0	NA	NA	NA	NA	NA	0	0	0	0	0	0
AT1G14960	2.49848	-4.30205	3.75065	-1.14701	0.251376	NA	0	0	14.9909	0	0	0
AT1G14970	36.3156	-0.358215	0.728441	-0.491756	0.622892	0.828401	57.6446	39.8011	25.2478	19.143	40.0853	35.9715
AT1G14980	712.334	-0.709224	0.225935	-3.13906	0.0016949	0.0175482	989.801	936.273	726.662	541.225	593.645	486.397
AT1G14990	119.48	0.185718	0.532412	0.348825	0.727221	0.886367	84.358	58.1222	192.514	139.222	70.6265	172.037
AT1G15000	138.658	0.145305	0.430828	0.337269	0.735914	0.891536	96.3087	109.927	188.569	193.17	129.8	114.17
AT1G15002	16.2715	-1.5532	1.19786	-1.29664	0.194754	0.447313	2.10895	46.1187	24.4588	10.4416	6.68089	7.81988
AT1G15010	6747.34	-0.898837	0.211548	-4.24886	2.15e-05	0.000510549	6551.1	10736.8	9066.31	3694.6	5590	4845.2
AT1G15015	75.0274	-0.627452	0.560384	-1.11968	0.262849	0.528312	109.665	90.9739	71.7983	57.429	29.5868	90.7106
AT1G15020	324.979	0.124302	0.308097	0.403452	0.686616	0.865644	347.977	260.287	325.854	229.716	390.355	395.686
AT1G15030	638.918	0.331619	0.257954	1.28558	0.198591	0.452074	479.435	665.879	553.873	616.057	928.644	589.619
AT1G15040	275.004	-0.755816	0.448205	-1.68632	0.0917351	0.28619	324.778	379.69	330.588	130.521	88.7604	395.686
AT1G15045	0	NA	NA	NA	NA	NA	0	0	0	0	0	0
AT1G15050	17.9509	-0.123566	1.18441	-0.104327	0.91691	0.969839	18.2776	22.1117	15.7799	29.5847	21.9515	0
AT1G15060	289.238	0.188851	0.281822	0.670109	0.502789	0.746815	310.719	255.232	244.588	316.73	284.415	323.743
AT1G15080	167.648	1.45757	0.479462	3.04001	0.00236571	0.0224889	85.764	46.7505	135.707	356.756	125.982	254.928
AT1G15090	0	NA	NA	NA	NA	NA	0	0	0	0	0	0
AT1G15100	957.768	-0.417741	0.316509	-1.31984	0.186888	0.436563	895.601	1126.43	1267.91	429.848	1298	728.813
AT1G15110	231.601	0.655805	0.318382	2.0598	0.0394173	0.166569	165.904	185.738	186.991	327.171	215.697	308.103
AT1G15120	650.435	-0.214726	0.248433	-0.864323	0.387411	0.654361	816.164	755.589	524.68	513.381	615.596	677.202
AT1G15125	14.7912	1.67936	1.3385	1.25466	0.209603	0.466926	14.7627	6.31763	0	6.96109	20.0427	40.6634
AT1G15130	690.607	0.856043	0.233617	3.6643	0.00024802	0.00385863	488.574	427.072	558.607	830.111	766.393	1072.89
AT1G15140	382.157	-0.322225	0.267008	-1.2068	0.227509	0.487138	385.235	463.083	424.478	414.185	302.549	303.411
AT1G15150	9.31097	0.616115	1.87613	0.328397	0.742611	0.894787	20.3865	0	1.57799	10.4416	0	23.4596
AT1G15160	88.9482	1.54856	0.513766	3.01413	0.00257719	0.0239826	53.4267	22.7435	59.9634	154.884	126.937	115.734
AT1G15165	92.8018	0.353585	0.483387	0.731473	0.46449	0.717116	93.4968	58.1222	92.3121	125.3	68.7177	118.862
AT1G15170	149.603	0.079603	0.458451	0.173634	0.862153	0.94917	176.449	69.494	190.147	153.144	109.757	198.625
AT1G15175	49.7291	-0.401527	0.905934	-0.443219	0.657607	0.848868	35.1492	67.5987	66.2754	106.157	2.86324	20.3317
AT1G15180	370.761	0.638979	0.265442	2.40723	0.0160742	0.0909882	250.965	315.882	302.184	494.238	382.72	478.577
AT1G15190	60.6998	-0.13023	0.572551	-0.227456	0.82007	0.930889	44.288	80.8657	64.6974	80.0526	45.8118	48.4833
AT1G15200	3060.4	0.651097	0.193506	3.36474	0.000766171	0.0094783	2792.95	2237.07	2112.13	3767.69	3065.57	4386.95
AT1G15210	0	NA	NA	NA	NA	NA	0	0	0	0	0	0
AT1G15215	183.712	0.935799	0.408896	2.2886	0.0221026	0.113236	142.003	70.7575	165.688	314.99	224.287	184.549
AT1G15220	119.067	0.366045	0.463271	0.790131	0.429451	0.690616	146.924	104.873	60.7524	100.936	167.977	132.938
AT1G15230	479.295	-0.234132	0.254036	-0.921648	0.356712	0.627541	526.535	568.587	459.194	504.679	469.571	347.203
AT1G15240	1175.01	0.666563	0.241605	2.75889	0.00579982	0.0439636	1110.71	794.127	818.974	1301.72	1124.3	1900.23
AT1G15250	217.273	0.0801742	0.32196	0.24902	0.803346	0.923613	210.895	183.843	238.276	259.301	186.11	225.213
AT1G15260	294.669	-1.05845	0.383817	-2.7577	0.00582099	0.0440914	440.771	355.051	396.074	308.028	94.4869	173.601
AT1G15270	1431.03	-0.235707	0.228476	-1.03165	0.302236	0.569954	1481.19	2023.54	1138.52	1326.09	1434.48	1182.37
AT1G15280	1523.33	0.608201	0.195766	3.10677	0.00189143	0.0190764	1251.31	1180.13	1187.43	1916.04	1476.48	2128.57
AT1G15290	1079.64	0.0252142	0.248712	0.101379	0.91925	0.970754	1240.06	1145.39	822.919	1449.65	875.196	944.642
AT1G15300.1	47.8711	0.914316	0.754994	1.21102	0.225886	0.485189	8.4358	61.2811	29.9817	40.0263	84.9427	62.5591
AT1G15310	58.9126	-0.192571	0.555083	-0.346924	0.728649	0.887311	73.8133	58.1222	56.8075	59.1693	64.9001	40.6634
AT1G15320	0	NA	NA	NA	NA	NA	0	0	0	0	0	0
AT1G15330	3.7072	-2.93908	2.83878	-1.03533	0.300514	0.568328	0	0	19.7248	0	0.954413	1.56398
AT1G15340	1252.22	0.32163	0.191852	1.67645	0.0936498	0.289687	1134.62	1046.2	1157.45	1425.28	1192.06	1557.72
AT1G15350	704.502	0.530498	0.227827	2.32851	0.019885	0.105255	635.497	511.097	583.854	673.486	919.099	903.978
AT1G15360	0	NA	NA	NA	NA	NA	0	0	0	0	0	0
AT1G15370	946.476	0.193964	0.224073	0.865625	0.386696	0.654045	699.469	1061.99	888.406	941.488	1149.11	938.386
AT1G15380	27.4167	0.331965	0.966219	0.343571	0.731169	0.888847	7.02983	24.6388	41.0276	59.1693	24.8147	7.81988
AT1G15385	0.262998	-1.03686	4.02598	-0.257542	0.79676	NA	0	0	1.57799	0	0	0
AT1G15390	305.904	-0.569476	0.298207	-1.90967	0.0561758	0.209307	334.62	471.296	290.349	243.638	245.284	250.236
AT1G15400	935.945	-0.901271	0.274213	-3.28675	0.0010135	0.0118982	1129.69	1122.01	1409.93	478.575	968.729	506.728
AT1G15405	10.722	-0.719478	1.47803	-0.486782	0.626413	0.829942	29.5253	5.05411	5.52295	0	8.58971	15.6398
AT1G15410	62.614	0.366265	0.593651	0.616971	0.537254	0.772237	59.0506	68.8622	35.5047	97.4553	38.1765	76.6348
AT1G15415	11.056	-1.68855	1.37968	-1.22387	0.221002	0.479176	9.84177	12.6353	28.4037	0	7.6353	7.81988
AT1G15420	319.277	-0.00911429	0.28094	-0.0324421	0.974119	0.990274	257.995	367.055	335.322	321.951	293.959	339.383
AT1G15430	1029.01	-0.197078	0.237812	-0.828713	0.407267	0.672477	771.173	1388.62	1137.73	894.501	959.185	1022.84
AT1G15440	95.2629	0.430517	0.444753	0.96799	0.333049	0.602691	73.1103	81.4975	89.1562	114.858	126.937	86.0187
AT1G15450	0.290046	1.94267	4.07804	0.476374	0.633808	NA	0	0	0	1.74027	0	0
AT1G15460	3.66685	0.619156	2.43615	0.254154	0.799377	0.921277	7.02983	0	1.57799	8.70137	0	4.69193
AT1G15470	232.885	0.650115	0.341916	1.90139	0.0572514	0.211965	175.043	125.721	243.799	269.742	314.002	269.004
AT1G15480	19.6484	-0.974868	1.49615	-0.651586	0.514668	0.755688	75.2192	0	3.15597	12.1819	25.7691	1.56398
AT1G15490	43.7453	0.340684	1.13263	0.300791	0.763574	0.905369	58.3476	5.05411	52.0735	107.897	0	39.0994
AT1G15500	471.338	-0.0990019	0.287165	-0.344756	0.730278	0.888343	437.256	475.718	550.717	508.16	562.149	294.028
AT1G15510	12.0833	-0.46381	1.51647	-0.305849	0.75972	0.903438	14.0597	27.1658	0.788993	0	8.58971	21.8957
AT1G15520	55.9913	0.566466	0.67788	0.835643	0.403356	0.668472	35.1492	74.5481	26.0368	62.6499	107.849	29.7156
AT1G15530	22.7894	1.69399	0.899506	1.88325	0.0596666	0.217601	8.4358	14.5306	9.46791	22.6236	58.2192	23.4596
AT1G15540	0	NA	NA	NA	NA	NA	0	0	0	0	0	0
AT1G15550	92.8954	-0.974435	0.498032	-1.95657	0.0503978	0.195166	89.9819	159.204	119.138	87.0137	41.0397	60.9951
AT1G15560.1	0	NA	NA	NA	NA	NA	0	0	0	0	0	0
AT1G15570	17.7315	-0.171488	1.25228	-0.13694	0.891078	0.961055	15.4656	5.05411	35.5047	40.0263	0.954413	9.38386
AT1G15580	59.1231	1.21475	1.78388	0.680961	0.495896	0.74171	0	11.3717	95.4681	121.819	57.2648	68.815
AT1G15590	0	NA	NA	NA	NA	NA	0	0	0	0	0	0
AT1G15600	0	NA	NA	NA	NA	NA	0	0	0	0	0	0
AT1G15610	0.117164	0.00155855	4.08047	0.000381954	0.999695	NA	0.702983	0	0	0	0	0
AT1G15620	1.04265	3.99744	3.96693	1.00769	0.313602	NA	0	0	0	0	0	6.25591
AT1G15630	2.35513	-4.21778	3.40249	-1.23962	0.215117	NA	7.02983	0	7.10093	0	0	0
AT1G15640	0	NA	NA	NA	NA	NA	0	0	0	0	0	0
AT1G15650	0	NA	NA	NA	NA	NA	0	0	0	0	0	0
AT1G15660	55.8316	1.21651	0.572469	2.12503	0.0335841	0.150166	26.0104	42.9599	31.5597	87.0137	62.9912	84.4547
AT1G15670	148.314	-0.485875	0.440668	-1.10259	0.270206	0.53643	183.479	87.1834	248.533	132.261	116.438	121.99
AT1G15680	0	NA	NA	NA	NA	NA	0	0	0	0	0	0
AT1G15690	3073.26	0.248136	0.17553	1.41364	0.157468	0.394324	2712.81	3219.47	2496.37	3565.82	3479.79	2965.3
AT1G15700	55.6197	-0.405176	0.618493	-0.655102	0.512402	0.754255	41.476	92.2375	56.0185	41.7666	33.4044	68.815
AT1G15710	172.901	-0.488442	0.352854	-1.38426	0.166279	0.407029	177.855	245.756	182.257	125.3	149.843	156.398
AT1G15720	35.7985	-1.93992	0.888229	-2.18403	0.0289601	0.135761	37.2581	121.299	11.8349	15.6625	16.225	12.5118
AT1G15730	968.339	0.0478383	0.205481	0.232811	0.815908	0.928652	797.886	1063.26	994.92	990.216	914.327	1049.43
AT1G15740	2054.12	0.0198448	0.177604	0.111736	0.911033	0.968155	2170.11	2057.02	1891.22	2039.6	1828.65	2338.14
AT1G15750	661.867	0.137253	0.256836	0.5344	0.593065	0.810878	776.094	495.934	620.937	642.161	858.971	577.107
AT1G15757	0	NA	NA	NA	NA	NA	0	0	0	0	0	0
AT1G15760	0	NA	NA	NA	NA	NA	0	0	0	0	0	0
AT1G15770	0	NA	NA	NA	NA	NA	0	0	0	0	0	0
AT1G15772	1.74976	4.77224	3.94209	1.21059	0.226054	NA	0	0	0	0	10.4985	0
AT1G15780	162.941	0.0150379	0.397961	0.0377874	0.969857	0.988543	235.499	143.41	107.303	158.365	164.159	168.909
AT1G15790	206.019	0.29219	0.358172	0.815782	0.414625	0.678471	224.252	163.627	167.266	193.17	176.566	311.231
AT1G15800	195.146	0.529581	0.384967	1.37565	0.168929	0.410389	104.042	150.36	225.652	207.093	288.233	195.497
AT1G15810	296.032	-0.103765	0.361429	-0.287097	0.774038	0.910285	245.341	418.227	254.845	302.808	171.794	383.174
AT1G15820	41081.7	-0.327044	0.205545	-1.59111	0.111585	0.322772	34554.4	58082.4	44516.5	44136.8	34751.1	30449.1
AT1G15825	6.98145	-1.9933	1.90819	-1.0446	0.296207	0.563986	4.92088	22.7435	5.52295	8.70137	0	0
AT1G15830	7.39421	1.35677	1.64126	0.826665	0.408427	0.673221	0	3.79058	8.67892	13.9222	8.58971	9.38386
AT1G15840	29.9925	-0.433326	0.991617	-0.436989	0.662119	0.851383	12.6537	53.0681	37.0827	62.6499	6.68089	7.81988
AT1G15850	0	NA	NA	NA	NA	NA	0	0	0	0	0	0
AT1G15860	625.882	-0.157016	0.271184	-0.579	0.562589	0.790017	464.672	869.938	643.818	694.369	516.337	566.159
AT1G15870	53.4737	0.631209	0.666601	0.946907	0.343686	0.613591	26.0104	64.4399	35.5047	81.7929	84.9427	28.1516
AT1G15880	2985.41	0.245595	0.158921	1.54539	0.122252	0.340543	2594.01	2693.21	2909.8	3059.4	3413.93	3242.12
AT1G15885	1157.45	1.09592	0.315622	3.47225	0.000516119	0.00690203	681.191	902.158	628.038	2457.27	790.254	1485.78
AT1G15890	459.453	-0.203907	0.275599	-0.739867	0.459381	0.713475	530.05	411.91	535.726	313.249	532.562	433.221
AT1G15900	92.3257	0.0921688	0.487111	0.189215	0.849924	0.943815	102.636	59.3858	106.514	106.157	113.575	65.687
AT1G15910	309.533	0.268379	0.349917	0.76698	0.443094	0.700412	264.322	169.313	409.487	370.678	371.267	272.132
AT1G15920	691.942	1.03437	0.216488	4.77795	1.77e-06	6.15e-05	486.465	474.454	401.597	859.695	1031.72	897.722
AT1G15930	1415.03	-0.358268	0.200705	-1.78505	0.0742535	0.251182	1708.95	1590.15	1469.1	1498.38	1188.24	1035.35
AT1G15940	166.912	0.227735	0.386424	0.589338	0.555634	0.785585	217.222	138.356	105.725	175.768	186.11	178.293
AT1G15950	194.323	0.0674485	0.34569	0.195113	0.845305	0.942378	177.152	185.738	206.716	147.923	196.609	251.8
AT1G15960	78.1621	2.13825	0.577756	3.70095	0.000214794	0.00342232	44.9909	26.5341	14.9909	121.819	79.2163	181.421
AT1G15970	198.988	0.0139709	0.399346	0.0349844	0.972092	0.989323	127.24	243.861	221.707	262.781	124.074	214.265
AT1G15980	508.484	0.503431	0.232761	2.16287	0.0305511	0.140491	409.839	402.433	448.937	619.537	521.109	649.05
AT1G15990	18.1848	-0.574031	0.967279	-0.593449	0.552881	0.78364	23.9014	13.8988	27.6147	8.70137	16.225	18.7677
AT1G16000	118.769	-1.18668	0.482629	-2.45879	0.0139406	0.082123	233.391	159.204	101.78	106.157	62.0368	50.0472
AT1G16010	823.424	0.286779	0.215455	1.33104	0.183176	0.431272	622.843	748.008	854.479	873.617	848.473	993.125
AT1G16020	229.09	-0.489255	0.345601	-1.41566	0.156874	0.393708	322.669	176.262	304.551	170.547	212.834	187.677
AT1G16022	0	NA	NA	NA	NA	NA	0	0	0	0	0	0
AT1G16025	0	NA	NA	NA	NA	NA	0	0	0	0	0	0
AT1G16030	37.1732	1.2655	0.74314	1.70291	0.0885857	0.280065	24.6044	10.1082	30.7707	52.2082	33.4044	71.9429
AT1G16040	795.232	0.553427	0.206826	2.6758	0.007455	0.0525779	683.3	677.25	572.02	983.255	860.88	994.689
AT1G16060	68.1091	-0.954531	0.58554	-1.63017	0.103065	0.30726	61.1596	130.143	77.3213	62.6499	25.7691	51.6112
AT1G16070	0.580091	3.12435	4.01598	0.77798	0.436581	NA	0	0	0	3.48055	0	0
AT1G16080	791.536	-0.531864	0.200778	-2.64902	0.0080725	0.0556988	934.968	958.385	915.231	624.758	704.357	611.515
AT1G16090	183.286	0.53916	0.421661	1.27866	0.201018	0.455374	107.556	129.512	212.239	215.794	306.366	128.246
AT1G16100	0	NA	NA	NA	NA	NA	0	0	0	0	0	0
AT1G16110	1546	-0.344175	0.198384	-1.73489	0.0827607	0.268788	1884.7	1685.54	1621.38	1181.65	1657.81	1244.93
AT1G16120	30.5864	0.275589	0.84328	0.326806	0.743815	0.895605	30.2283	34.1152	18.1468	53.9485	9.54413	37.5354
AT1G16130	672.657	0.0600688	0.206913	0.290309	0.77158	0.909669	665.725	636.186	673.8	673.486	659.499	727.249
AT1G16140	6.97993	-1.83094	1.89803	-0.964652	0.334719	0.604383	0	29.6929	3.15597	1.74027	5.72648	1.56398
AT1G16150	27.313	-0.711378	1.0994	-0.647063	0.517591	0.758021	8.4358	51.8046	41.8166	0	30.5412	31.2795
AT1G16160	12.0682	2.14488	1.7445	1.22951	0.218881	0.476843	12.6537	0.631763	0	27.8444	0	31.2795
AT1G16170	577.246	-0.0599492	0.263581	-0.227442	0.82008	0.930889	512.475	736.004	518.368	699.59	549.742	447.297
AT1G16180	2282.14	-0.0365077	0.179413	-0.203484	0.838757	0.939837	2249.55	2111.99	2573.69	2201.45	2551.15	2005.02
AT1G16190	230.724	0.649247	0.307641	2.1104	0.0348238	0.153775	196.835	167.417	174.367	273.223	247.193	325.307
AT1G16210	805.24	0.661515	0.230965	2.86414	0.00418144	0.0343542	557.466	535.104	778.736	957.151	884.741	1118.24
AT1G16220	82.5142	-1.1726	0.687715	-1.70506	0.0881824	0.279049	86.467	171.84	83.6332	43.5068	9.54413	100.094
AT1G16225	0	NA	NA	NA	NA	NA	0	0	0	0	0	0
AT1G16230	8.24009	-1.51725	1.71368	-0.885371	0.375957	0.644596	14.7627	20.8482	0.788993	5.22082	0	7.81988
AT1G16240	2053.39	0.787267	0.164129	4.79664	1.61e-06	5.67e-05	1520.55	1541.5	1458.06	2438.12	2636.09	2726.01
AT1G16250	189.805	0.401167	0.376937	1.06428	0.287201	0.555676	201.053	151.623	137.285	201.872	149.843	297.156
AT1G16260	806.299	0.116325	0.210574	0.552421	0.58066	0.802676	807.728	780.86	734.552	737.876	974.455	802.32
AT1G16270	261.122	0.339578	0.302483	1.12263	0.261593	0.527151	219.331	281.767	190.147	280.184	282.506	312.795
AT1G16280	92.283	-0.595341	0.482979	-1.23264	0.217709	0.475663	87.17	130.143	115.982	48.7277	71.581	100.094
AT1G16290	0.521325	2.98828	4.02655	0.742144	0.458	NA	0	0	0	0	0	3.12795
AT1G16300	53.9633	-0.706664	0.766677	-0.921723	0.356673	0.627527	82.2491	39.1693	80.4772	6.96109	82.0795	32.8435
AT1G16310	2.22611	-4.13823	3.90827	-1.05884	0.289674	NA	13.3567	0	0	0	0	0
AT1G16320	885.955	0.11659	0.208466	0.559278	0.575972	0.799868	724.073	892.05	933.378	984.995	830.339	950.898
AT1G16330	9.70591	-0.795535	1.53152	-0.519443	0.603452	0.816864	3.51492	18.9529	14.2019	12.1819	0	9.38386
AT1G16340	60.1496	0.205842	0.639866	0.321695	0.747684	0.897571	56.2387	67.5987	43.3946	111.378	57.2648	25.0236
AT1G16350	120.414	0.203008	0.446054	0.45512	0.649023	0.843941	97.0117	137.093	100.991	191.43	102.122	93.8386
AT1G16360	9.63296	-1.04708	1.74003	-0.60176	0.547334	0.77999	24.6044	6.9494	7.10093	19.143	0	0
AT1G16370	1819.01	-0.810409	0.20974	-3.86388	0.0001116	0.00202741	2183.47	2488.52	2274.67	1567.99	966.82	1432.6
AT1G16380	30.3561	-0.353718	0.862828	-0.409952	0.681841	0.862863	49.2088	20.8482	31.5597	52.2082	9.54413	18.7677
AT1G16390	31.0968	-0.126829	1.11478	-0.113771	0.90942	0.967371	11.9507	35.3788	49.7065	34.8055	0	54.7392
AT1G16400	12.7392	-1.92726	1.63472	-1.17895	0.238416	0.500701	27.4164	33.4835	0	0	12.4074	3.12795
AT1G16410	73.1308	-1.71724	0.710052	-2.41847	0.0155857	0.0890123	66.7834	241.334	28.4037	36.5457	39.1309	26.5876
AT1G16420	143.438	0.450615	0.489242	0.921047	0.357026	0.62777	119.507	84.6563	160.954	97.4553	290.141	107.914
AT1G16430	134.747	0.388192	0.385003	1.00828	0.313319	0.581691	99.8237	121.299	128.606	180.988	130.755	147.014
AT1G16440	1.91279	4.87301	3.69069	1.32035	0.186718	NA	0	0	0	5.22082	0	6.25591
AT1G16445	55.5959	-0.203926	0.71224	-0.286316	0.774636	0.910403	30.2283	46.7505	100.991	69.6109	17.1794	68.815
AT1G16450	0	NA	NA	NA	NA	NA	0	0	0	0	0	0
AT1G16460	1673.17	0.674361	0.196824	3.42621	0.000612063	0.00792623	1425.65	1028.51	1413.87	1872.53	2068.21	2230.23
AT1G16470	322.97	-0.274235	0.307373	-0.892189	0.372292	0.641392	332.511	357.578	372.404	193.17	369.358	312.795
AT1G16480	21.9448	0.772183	1.21675	0.634629	0.525671	0.764678	33.0402	0	15.7799	13.9222	43.903	25.0236
AT1G16489	3.31788	2.93081	2.50322	1.17082	0.241673	0.504462	0	0	2.36698	1.74027	9.54413	6.25591
AT1G16490	31.4076	1.60965	0.841008	1.91395	0.0556264	0.207866	3.51492	24.007	18.9358	53.9485	45.8118	42.2274
AT1G16500	30.9754	-0.0727213	0.798635	-0.0910569	0.927447	0.973822	43.585	36.6423	14.9909	40.0263	33.4044	17.2037
AT1G16510	47.7073	-1.97008	0.828897	-2.37675	0.0174657	0.0965665	80.8431	84.0245	64.6974	5.22082	46.7662	4.69193
AT1G16515	23.9331	-3.88838	1.18625	-3.27789	0.00104586	0.0121665	68.1894	52.4364	13.4129	1.74027	0	7.81988
AT1G16520	7.68727	-3.72517	1.8697	-1.99239	0.0463283	0.184514	15.4656	24.6388	3.15597	0	2.86324	0
AT1G16530	0	NA	NA	NA	NA	NA	0	0	0	0	0	0
AT1G16540	140.224	0.0570031	0.395987	0.143952	0.885538	0.958728	165.201	93.501	153.854	139.222	144.116	145.45
AT1G16550	29.0813	0.137579	0.805481	0.170803	0.864379	0.950072	18.2776	34.1152	30.7707	40.0263	37.2221	14.0758
AT1G16560	245.62	-0.236511	0.331908	-0.712581	0.476105	0.72647	222.143	316.514	259.579	160.105	272.962	242.416
AT1G16570	110.519	-0.517682	0.420767	-1.23033	0.218574	0.476593	102.636	138.988	149.12	81.7929	98.3045	92.2746
AT1G16590	167.796	0.394011	0.412622	0.954896	0.33963	0.609823	172.231	144.674	118.349	107.897	189.928	273.696
AT1G16600	0.913571	-2.85477	3.94097	-0.724383	0.46883	NA	4.2179	1.26353	0	0	0	0
AT1G16610	694.463	0.895442	0.208613	4.29235	1.77e-05	0.00043453	469.593	504.779	482.074	864.916	852.291	993.125
AT1G16620.1	0	NA	NA	NA	NA	NA	0	0	0	0	0	0
AT1G16630	2.78958	-4.46488	3.20079	-1.39493	0.163037	NA	0	12.0035	4.73396	0	0	0
AT1G16635	31.1284	-0.173122	0.824198	-0.210049	0.833629	0.937427	38.6641	32.2199	28.4037	34.8055	44.8574	7.81988
AT1G16640	9.02133	7.12073	1.89006	3.76747	0.000164913	0.00277668	0	0	0	15.6625	18.1338	20.3317
AT1G16650	325.129	-0.00583126	0.361486	-0.0161314	0.98713	0.994954	377.502	286.821	311.652	299.327	176.566	498.908
AT1G16660.1	0	NA	NA	NA	NA	NA	0	0	0	0	0	0
AT1G16670	248.743	-0.260115	0.319277	-0.814699	0.415244	0.679213	241.826	308.301	264.313	167.066	270.099	240.852
AT1G16680	101.161	0.0211051	0.472591	0.0446584	0.96438	0.986348	104.042	85.9198	110.459	120.079	58.2192	128.246
AT1G16690	137.088	1.11613	0.391142	2.85352	0.0043238	0.0351523	106.853	66.3352	86.7892	165.326	203.29	193.933
AT1G16700	561.806	0.25489	0.240272	1.06084	0.288762	0.557148	424.602	540.158	572.809	523.822	638.502	670.946
AT1G16705	8.51676	0.408348	1.90864	0.213947	0.830588	0.935947	0	0	22.0918	8.70137	17.1794	3.12795
AT1G16710	321.026	0.60939	0.298199	2.04357	0.040996	0.170913	309.313	219.854	232.753	381.12	309.23	473.885
AT1G16720	1118.96	0.154699	0.20977	0.737469	0.460837	0.71457	1016.51	912.898	1246.61	1345.23	1033.63	1158.91
AT1G16730	229.411	-0.837346	0.321801	-2.60206	0.00926646	0.061859	321.263	317.777	244.588	139.222	195.655	157.962
AT1G16740	558.676	-0.289564	0.258552	-1.11994	0.262739	0.528301	595.427	763.17	484.441	581.251	503.93	423.838
AT1G16750	193.071	-0.155124	0.352449	-0.44013	0.659843	0.850448	241.826	177.526	190.936	222.755	190.883	134.502
AT1G16760	1.07757	-1.90986	3.84064	-0.497276	0.618994	NA	1.40597	2.52705	1.57799	0	0.954413	0
AT1G16770	48.4171	1.11397	0.626728	1.77743	0.0754971	0.25419	40.773	26.5341	24.4588	85.2734	69.6721	43.7913
AT1G16780	168.121	-0.0278808	0.354009	-0.0787573	0.937226	0.977562	159.577	184.475	164.899	144.443	148.888	206.445
AT1G16790	80.8123	-0.58502	0.610235	-0.95868	0.33772	0.607845	34.4462	169.313	86.7892	87.0137	57.2648	50.0472
AT1G16800	81.977	0.606396	0.493393	1.22903	0.21906	0.476978	72.4073	58.1222	63.9084	130.521	66.8089	100.094
AT1G16810	642.416	-0.246942	0.253264	-0.975037	0.329542	0.599258	533.564	805.498	751.91	536.004	509.656	717.865
AT1G16820	323.129	-0.129001	0.289426	-0.445712	0.655805	0.848358	315.64	427.072	269.835	314.99	318.774	292.464
AT1G16825	119.974	0.651223	0.450077	1.44692	0.147921	0.380372	136.379	71.3893	71.7983	186.209	116.438	137.63
AT1G16830	6.1395	-0.67513	2.01236	-0.335492	0.737254	0.892045	0	13.8988	8.67892	10.4416	3.81765	0
AT1G16840	509.461	0.190987	0.268243	0.711993	0.476469	0.726595	356.413	598.912	471.029	633.46	488.659	508.292
AT1G16850	117.564	-0.475084	0.499834	-0.950483	0.341867	0.612094	76.6252	179.421	155.432	66.1304	152.706	75.0709
AT1G16858	0	NA	NA	NA	NA	NA	0	0	0	0	0	0
AT1G16860	0	NA	NA	NA	NA	NA	0	0	0	0	0	0
AT1G16870	105.953	0.452559	0.465971	0.971216	0.331441	0.60108	72.4073	128.88	67.0644	139.222	137.435	90.7106
AT1G16880	7095.02	0.128604	0.147112	0.87419	0.382015	0.649885	6578.52	7059.96	6697.76	7897.36	7295.53	7041.02
AT1G16890	2514.83	-0.106365	0.200194	-0.531309	0.595205	0.811928	2866.77	2889.69	2067.95	2063.96	2837.47	2363.17
AT1G16900	115.772	0.0696251	0.436069	0.159665	0.873145	0.953623	91.3879	118.14	128.606	137.482	78.2618	140.758
AT1G16905	0	NA	NA	NA	NA	NA	0	0	0	0	0	0
AT1G16910	0.600154	-2.24539	3.95882	-0.567186	0.570588	NA	2.81193	0	0.788993	0	0	0
AT1G16916	237.559	0.309722	0.423413	0.731488	0.464481	0.717116	111.774	290.611	233.542	391.562	241.466	156.398
AT1G16920	141.366	-0.0796786	0.45011	-0.177021	0.859492	0.948178	179.964	82.1293	174.367	151.404	172.749	87.5827
AT1G16930	83.5229	-1.75826	0.654013	-2.68842	0.0071791	0.0511252	165.904	132.67	89.1562	5.22082	53.4471	54.7392
AT1G16940	1.99179	-3.97778	3.92251	-1.01409	0.310539	NA	11.9507	0	0	0	0	0
AT1G16950	0.820147	-2.69793	3.94487	-0.683907	0.494034	NA	4.92088	0	0	0	0	0
AT1G16960	2.47183	-3.15334	3.47834	-0.906564	0.364637	NA	0	13.267	0	0	0	1.56398
AT1G16970	269.788	0.0936171	0.336501	0.278208	0.780853	0.913031	249.559	313.355	218.551	377.639	193.746	265.876
AT1G16980	2.43348	0.531561	3.08485	0.172313	0.863191	NA	2.10895	3.79058	0	8.70137	0	0
AT1G17000	0.612154	-0.496636	3.99257	-0.12439	0.901006	NA	2.10895	0	0	0	0	1.56398
AT1G17010	0	NA	NA	NA	NA	NA	0	0	0	0	0	0
AT1G17020	72.3925	-0.764765	0.670819	-1.14005	0.254267	0.519236	124.428	65.7034	83.6332	10.4416	56.3104	93.8386
AT1G17030	0	NA	NA	NA	NA	NA	0	0	0	0	0	0
AT1G17040	177.21	-0.0295459	0.340219	-0.0868438	0.930796	0.975294	187.697	154.15	195.67	177.508	191.837	156.398
AT1G17050	478.945	-0.0547918	0.236544	-0.231635	0.816822	0.929439	444.286	528.786	490.753	442.03	448.574	519.24
AT1G17060	244.944	-0.646502	0.380579	-1.69873	0.0893693	0.281264	414.76	159.204	323.487	193.17	219.515	159.526
AT1G17070	72.6074	0.679264	0.600598	1.13098	0.258064	0.522715	79.4371	20.8482	67.0644	120.079	71.581	76.6348
AT1G17080	813.725	-0.615908	0.21153	-2.91168	0.00359485	0.0307789	1003.16	938.801	1013.86	532.524	682.405	711.609
AT1G17090	42.4037	-0.239777	0.685207	-0.349934	0.726388	0.886138	61.8625	22.1117	53.6515	45.2471	32.45	39.0994
AT1G17100	1151.35	0.0631141	0.213221	0.296003	0.767228	0.907256	1323.01	1099.27	957.048	1230.37	1320.91	977.485
AT1G17110	737.142	0.229823	0.243616	0.943383	0.345485	0.615244	765.549	506.043	763.745	757.019	701.493	929.002
AT1G17120	162.572	-0.98205	0.48382	-2.02979	0.0423783	0.174287	191.212	147.201	310.863	99.1956	178.475	48.4833
AT1G17130	325.788	-0.0991511	0.314595	-0.315171	0.752632	0.900239	445.692	237.543	327.432	290.626	279.643	373.79
AT1G17140	215.737	-1.89669	0.406764	-4.66288	3.12e-06	0.000100378	383.829	406.856	228.019	144.443	68.7177	62.5591
AT1G17145	891.033	0.698901	0.221518	3.15505	0.00160471	0.0168142	760.628	632.395	645.396	884.059	1109.98	1313.74
AT1G17147	895.608	-1.1198	0.263364	-4.25192	2.12e-05	0.000506335	1493.14	1232.57	957.837	421.146	760.667	508.292
AT1G17150	0.105294	0.00155855	4.08047	0.000381954	0.999695	NA	0	0.631763	0	0	0	0
AT1G17160	334.194	-0.281789	0.317762	-0.886795	0.375189	0.64405	262.916	353.788	484.441	314.99	355.996	233.032
AT1G17170	66.2952	-0.0294633	0.671649	-0.0438672	0.96501	0.986687	85.061	25.2705	91.5231	43.5068	116.438	35.9715
AT1G17180	2.10398	-4.05393	3.9217	-1.03372	0.301269	NA	0	0	12.6239	0	0	0
AT1G17190	112.074	-0.43434	0.44741	-0.970788	0.331654	0.601282	177.855	96.028	112.037	116.598	79.2163	90.7106
AT1G17200	867.768	-0.831944	0.249133	-3.33936	0.000839714	0.0102335	1136.02	1073.37	1121.16	856.215	455.255	564.595
AT1G17210	399.889	-0.453101	0.280048	-1.61794	0.105676	0.312524	558.169	387.271	441.836	367.198	383.674	261.184
AT1G17220	581.91	0.0170675	0.220211	0.0775055	0.938221	0.977913	598.942	552.161	585.432	551.667	648.046	555.212
AT1G17230	84.8943	0.0699794	0.522693	0.133883	0.893495	0.961463	55.5357	100.45	92.3121	123.559	85.8971	51.6112
AT1G17232	0	NA	NA	NA	NA	NA	0	0	0	0	0	0
AT1G17235	4.59718	-0.902053	2.34265	-0.385056	0.700196	0.873119	0	17.0576	0.788993	3.48055	0	6.25591
AT1G17240	39.3752	0.54408	0.687725	0.79113	0.428868	0.690106	17.5746	32.8517	45.7616	46.9874	47.7206	45.3553
AT1G17250	0	NA	NA	NA	NA	NA	0	0	0	0	0	0
AT1G17255	32.4583	1.21278	0.730733	1.65967	0.0969801	0.29578	16.1686	18.9529	23.6698	31.3249	46.7662	57.8671
AT1G17260	40.5089	0.473862	0.707722	0.669561	0.503138	0.747141	14.0597	41.0646	46.5506	48.7277	41.0397	51.6112
AT1G17270	94.8086	-0.548288	0.439452	-1.24766	0.212154	0.470029	127.943	107.4	102.569	71.3512	78.2618	81.3268
AT1G17275.1	1.70948	-3.75375	3.92515	-0.956335	0.338903	NA	0	0	10.2569	0	0	0
AT1G17277.1	0.657494	-2.37014	3.95453	-0.599347	0.548942	NA	0	0	3.94496	0	0	0
AT1G17280	1142.78	0.373909	0.19565	1.91111	0.0559905	0.208731	1130.4	856.04	1000.44	1333.05	1319.95	1216.77
AT1G17285	0	NA	NA	NA	NA	NA	0	0	0	0	0	0
AT1G17290	3811.74	-0.443654	0.197853	-2.24234	0.0249392	0.122712	5499.44	3921.99	3760.34	2714.83	3619.13	3354.73
AT1G17300	53.7503	2.10826	0.73844	2.85502	0.00430347	0.0350613	11.2477	20.8482	28.4037	175.768	31.4956	54.7392
AT1G17310	1.53606	-2.35981	3.74945	-0.629375	0.529103	NA	0.702983	6.9494	0	0	0	1.56398
AT1G17330	425.63	0.558302	0.319199	1.74907	0.0802786	0.263782	383.126	288.716	362.937	304.548	718.673	495.78
AT1G17340	598.359	-0.0322359	0.259677	-0.124138	0.901206	0.964049	665.022	558.479	594.111	497.718	793.117	481.705
AT1G17345	2.22611	-4.13823	3.90827	-1.05884	0.289674	NA	13.3567	0	0	0	0	0
AT1G17350	377.586	0.318636	0.308374	1.03328	0.301475	0.569361	390.156	223.644	395.285	440.289	487.705	328.435
AT1G17360	742.027	0.146237	0.227168	0.643739	0.519745	0.75971	641.121	630.5	843.433	694.369	890.467	752.273
AT1G17370	1608.65	0.471716	0.193813	2.43388	0.0149381	0.0861043	1251.31	1261	1533.8	1611.49	2155.06	1839.24
AT1G17380	4528.98	0.147013	0.21244	0.692023	0.488923	0.736677	3759.56	4205.02	4934.36	4004.37	6384.07	3886.48
AT1G17390.1	0.899152	2.61752	3.98686	0.656537	0.511479	NA	0.702983	0	0	0	0	4.69193
AT1G17400	0.842351	-2.74229	3.94373	-0.695356	0.486832	NA	0	5.05411	0	0	0	0
AT1G17410	450.478	1.31822	0.306189	4.30523	1.67e-05	0.00041347	200.35	288.084	286.404	421.146	865.652	641.23
AT1G17420	6369.41	0.193152	0.214117	0.902086	0.367011	0.636526	5448.12	5242.37	7144.33	5360.04	9065.97	5955.62
AT1G17430	50.6899	-0.176552	0.58462	-0.301994	0.762656	0.904671	53.4267	61.9128	45.7616	55.6888	41.9942	45.3553
AT1G17440	303.057	0.241937	0.321452	0.75264	0.451666	0.706989	309.313	219.854	305.34	221.015	404.671	358.151
AT1G17450	34.3241	0.202108	0.838588	0.241009	0.809548	0.926529	50.6148	7.58116	37.8716	20.8833	46.7662	42.2274
AT1G17455	66.6246	0.0124984	0.664957	0.0187959	0.985004	0.994236	118.804	27.1658	53.6515	59.1693	104.985	35.9715
AT1G17460	18.5091	-1.76974	1.1351	-1.5591	0.118972	0.335628	40.773	25.9023	19.7248	0	15.2706	9.38386
AT1G17470	416.927	0.0314663	0.250814	0.125457	0.900162	0.963756	460.454	392.325	384.239	382.86	404.671	477.013
AT1G17480	12.0649	1.64915	1.79315	0.919696	0.357731	0.628657	11.9507	0	5.52295	1.74027	0	53.1752
AT1G17490	180.57	-0.294064	0.340794	-0.862879	0.388204	0.655404	236.905	178.789	180.679	175.768	151.752	159.526
AT1G17495.1	1.44649	-3.51215	3.92849	-0.894022	0.37131	NA	0	0	8.67892	0	0	0
AT1G17500	50.2423	0.0129341	0.683051	0.0189358	0.984892	0.994236	34.4462	91.6057	23.6698	60.9096	43.903	46.9193
AT1G17510	110.153	-0.822103	0.52829	-1.55616	0.119671	0.336882	151.141	84.0245	188.569	55.6888	134.572	46.9193
AT1G17520	563.799	0.0885645	0.28268	0.313303	0.754051	0.901047	612.299	424.545	604.368	384.6	693.858	663.126
AT1G17530	186.584	-0.636623	0.359349	-1.7716	0.0764608	0.256045	203.162	239.438	239.065	172.287	167.022	98.5305
AT1G17540	2.57974	5.30457	2.98449	1.77738	0.0755052	NA	0	0	0	10.4416	1.90883	3.12795
AT1G17545	1.17164	-3.21238	3.93348	-0.816674	0.414114	NA	7.02983	0	0	0	0	0
AT1G17550	219.108	-0.961637	0.337768	-2.84703	0.00441288	0.0356408	306.501	345.575	216.973	123.559	159.387	162.654
AT1G17560	26.4921	-0.67828	1.10782	-0.612263	0.540364	0.774369	56.9417	13.8988	27.6147	0	44.8574	15.6398
AT1G17570	0	NA	NA	NA	NA	NA	0	0	0	0	0	0
AT1G17580	181.375	0.551201	0.3646	1.51179	0.130586	0.354645	155.359	174.998	110.459	198.391	178.475	270.568
AT1G17590	136.058	0.469014	0.439159	1.06798	0.285529	0.553801	68.1894	135.829	138.074	137.482	124.074	212.701
AT1G17600	16.7374	1.81477	1.37376	1.32102	0.186494	0.436225	1.40597	10.74	10.2569	0	63.9457	14.0758
AT1G17610	17.5615	1.97596	1.23207	1.60377	0.108765	0.317714	10.5448	10.74	0	10.4416	26.7236	46.9193
AT1G17615	0	NA	NA	NA	NA	NA	0	0	0	0	0	0
AT1G17620	719.682	-1.3039	0.274911	-4.743	2.11e-06	7.11e-05	1112.12	967.23	998.076	276.704	591.736	372.226
AT1G17630	13.427	-0.169244	1.43005	-0.118348	0.905792	0.966093	4.2179	1.26353	37.0827	27.8444	8.58971	1.56398
AT1G17640	212.163	-0.195518	0.366905	-0.532886	0.594113	0.811162	246.747	276.081	157.799	165.326	264.372	162.654
AT1G17650	152.451	0.193542	0.433615	0.446344	0.655348	0.848088	113.883	192.056	121.505	161.845	230.013	95.4026
AT1G17660	0	NA	NA	NA	NA	NA	0	0	0	0	0	0
AT1G17665	6.06405	-0.780077	2.17404	-0.358814	0.719734	0.882491	0.702983	22.1117	0	10.4416	0	3.12795
AT1G17670	0	NA	NA	NA	NA	NA	0	0	0	0	0	0
AT1G17680	369.95	0.393603	0.282486	1.39335	0.163513	0.403307	386.641	239.438	332.955	433.328	372.221	455.117
AT1G17690	166.225	0.389773	0.356225	1.09418	0.273877	0.541199	144.815	132.67	154.643	146.183	198.518	220.521
AT1G17700	3.31789	-3.69297	3.16061	-1.16843	0.242632	0.505574	0	18.9529	0	0	0.954413	0
AT1G17710	131.813	-1.95865	0.408361	-4.79638	1.62e-06	5.67e-05	200.35	256.496	172.789	46.9874	61.0824	53.1752
AT1G17720	1616.97	0.643359	0.174813	3.68026	0.000232994	0.00366459	1357.46	1173.18	1256.87	2003.06	2072.03	1839.24
AT1G17730	733.403	0.431256	0.211694	2.03716	0.0416335	0.172586	679.785	577.432	616.203	798.786	783.573	944.642
AT1G17744	0.822612	-2.70187	3.94477	-0.684925	0.493391	NA	3.51492	0.631763	0.788993	0	0	0
AT1G17745	223.887	-1.67515	0.355467	-4.71254	2.45e-06	8.08e-05	426.711	311.459	284.037	142.702	100.213	78.1988
AT1G17750	18.6009	-0.0773704	1.01651	-0.0761137	0.939329	0.978044	25.3074	8.21293	23.6698	31.3249	15.2706	7.81988
AT1G17760	338.157	0.555031	0.316849	1.75172	0.0798215	0.26304	383.126	191.424	246.955	388.081	362.677	456.681
AT1G17770	2.34328	-4.21223	3.83441	-1.09853	0.271972	NA	14.0597	0	0	0	0	0
AT1G17780	580.22	0.712698	0.248859	2.86386	0.00418516	0.034371	497.009	321.568	501.01	734.395	711.038	716.301
AT1G17790	208.607	0.0928088	0.360554	0.257406	0.796865	0.920595	132.864	273.554	198.826	219.274	195.655	231.468
AT1G17800	0	NA	NA	NA	NA	NA	0	0	0	0	0	0
AT1G17810	1.16018	4.14207	3.96124	1.04565	0.295723	NA	0	0	0	6.96109	0	0
AT1G17820	85.7675	-0.0147585	0.512045	-0.0288226	0.977006	0.991052	108.962	62.5446	87.5782	95.7151	109.757	50.0472
AT1G17830	304.046	-0.793984	0.337014	-2.35594	0.0184761	0.100293	513.881	341.784	299.817	304.548	176.566	187.677
AT1G17840	335.484	-1.28062	0.289846	-4.41827	9.95e-06	0.000265243	411.245	476.35	537.304	182.729	161.296	243.98
AT1G17850	75.1729	0.688311	0.587027	1.17254	0.240981	0.50366	98.4177	45.487	28.4037	121.819	67.7633	89.1467
AT1G17860	208.973	-0.988657	0.38806	-2.54769	0.0108439	0.0689928	360.631	289.979	184.624	116.598	195.655	106.35
AT1G17870	148.485	0.281602	0.374871	0.751197	0.452534	0.707752	150.438	128.88	123.083	125.3	170.84	192.369
AT1G17880	2350.47	-0.178951	0.191234	-0.935768	0.349393	0.619734	2272.04	2865.68	2348.04	2236.25	1831.52	2549.28
AT1G17890	145.101	0.534854	0.441702	1.21089	0.225936	0.485189	65.3775	173.735	116.771	151.404	214.743	148.578
AT1G17900.1	0	NA	NA	NA	NA	NA	0	0	0	0	0	0
AT1G17910	1.44649	-3.51215	3.92849	-0.894022	0.37131	NA	0	0	8.67892	0	0	0
AT1G17920	27.871	-0.282695	0.982215	-0.287813	0.77349	0.910285	39.3671	6.9494	45.7616	31.3249	39.1309	4.69193
AT1G17930	153.951	-0.0831759	0.467274	-0.178003	0.858721	0.947956	71.0013	202.164	201.193	194.911	101.168	153.27
AT1G17940	144.977	0.183094	0.537957	0.340351	0.733593	0.89026	185.588	34.1152	187.78	182.729	149.843	129.81
AT1G17950	0	NA	NA	NA	NA	NA	0	0	0	0	0	0
AT1G17960	8.21523	0.520714	1.99241	0.261349	0.793824	0.919481	20.3865	0	0	3.48055	23.8603	1.56398
AT1G17970	1356.47	0.137338	0.20277	0.67731	0.49821	0.742924	1111.42	1438.53	1323.93	1660.22	1215.92	1388.81
AT1G17980	1718.61	0.535017	0.197118	2.71419	0.00664374	0.0484415	1141.65	1571.2	1497.51	1855.13	1934.59	2311.56
AT1G17990	38.7107	1.77557	0.678055	2.61861	0.00882877	0.0597385	18.9806	13.8988	19.7248	43.5068	61.0824	75.0709
AT1G18000	6.90166	0.835006	1.57635	0.529709	0.596314	0.812683	4.92088	8.21293	1.57799	19.143	2.86324	4.69193
AT1G18010	10.0729	0.125909	1.25642	0.100212	0.920176	0.971058	14.0597	10.1082	4.73396	6.96109	10.4985	14.0758
AT1G18020	399.002	1.42527	0.287068	4.96492	6.87e-07	2.83e-05	220.737	277.344	150.698	596.914	543.061	605.259
AT1G18030	1076.73	1.17059	0.210036	5.5733	2.5e-08	1.62e-06	560.981	672.196	755.066	1261.7	1633.95	1576.49
AT1G18040	84.4473	0.0084165	0.47728	0.0176343	0.985931	0.994467	80.1401	95.3963	76.5323	85.2734	62.9912	106.35
AT1G18050	1.45023	4.46771	3.95032	1.13097	0.258066	NA	0	0	0	8.70137	0	0
AT1G18060	2230.33	-0.265117	0.18787	-1.41118	0.158193	0.395366	2331.8	2710.9	2258.89	2422.46	1795.25	1862.7
AT1G18070	1451.73	0.751548	0.224189	3.3523	0.000801443	0.00986695	1030.57	1084.74	1132.99	1359.15	2401.3	1701.61
AT1G18075	28.5075	0.514424	0.854361	0.602115	0.547097	0.779894	33.0402	18.9529	18.9358	17.4027	63.9457	18.7677
AT1G18080	571.662	-0.00362795	0.280198	-0.0129478	0.989669	0.996042	457.642	612.811	644.607	757.019	397.99	559.904
AT1G18090	39.9392	1.59687	0.954358	1.67324	0.0942795	0.290968	40.0701	0.631763	18.9358	34.8055	59.1736	86.0187
AT1G18100	1.92963	-2.74398	3.43088	-0.799789	0.423833	NA	8.4358	0	1.57799	0	0	1.56398
AT1G18120	0	NA	NA	NA	NA	NA	0	0	0	0	0	0
AT1G18130	4.35785	-4.04673	2.30344	-1.75682	0.0789479	0.261772	11.9507	9.47645	3.15597	0	0	1.56398
AT1G18140	14.1912	-6.81043	3.90898	-1.74225	NA	NA	84.358	0	0.788993	0	0	0
AT1G18150	253.68	-0.822404	0.42096	-1.95364	0.0507437	0.196024	371.175	348.102	255.634	104.416	325.455	117.298
AT1G18160	758.275	0.125941	0.237711	0.529806	0.596247	0.812645	838.659	682.936	654.864	602.135	838.929	932.13
AT1G18170	379.246	-0.021079	0.29689	-0.0709994	0.943398	0.979519	307.907	456.133	380.294	482.056	281.552	367.534
AT1G18180	25.9314	-0.295234	0.864176	-0.341637	0.732624	0.889612	38.6641	18.9529	28.4037	8.70137	29.5868	31.2795
AT1G18190	138.227	0.029986	0.433177	0.0692234	0.944812	0.979695	159.577	122.562	127.028	203.612	82.0795	134.502
AT1G18191	21.4626	-2.64242	1.25631	-2.10331	0.0354383	0.155467	10.5448	93.501	7.10093	0	6.68089	10.9478
AT1G18200	876.274	-0.00615556	0.202242	-0.0304366	0.975719	0.990717	802.807	925.533	907.341	781.383	955.367	885.211
AT1G18210	3282.58	-0.336093	0.194798	-1.72534	0.0844657	0.271868	2808.42	4133	4049.11	2542.54	3001.63	3160.8
AT1G18220	0.52366	-0.0575113	4.02351	-0.0142938	0.988596	NA	0	0	1.57799	0	0	1.56398
AT1G18230	0.159069	1.91537	4.07908	0.469558	0.638671	NA	0	0	0	0	0.954413	0
AT1G18240.1	0	NA	NA	NA	NA	NA	0	0	0	0	0	0
AT1G18250	5.25087	-0.122195	2.14635	-0.0569317	0.9546	0.983155	0	3.15882	13.4129	3.48055	11.453	0
AT1G18260	258.65	-0.0866834	0.297389	-0.291481	0.770683	0.90931	221.44	269.131	308.496	259.301	238.603	254.928
AT1G18265	114.624	0.662417	0.507458	1.30536	0.191769	0.443686	67.4864	120.035	78.1103	236.677	108.803	76.6348
AT1G18270	606.221	0.242637	0.248165	0.977722	0.328212	0.597688	546.218	480.772	640.662	502.939	747.305	719.429
AT1G18280	0	NA	NA	NA	NA	NA	0	0	0	0	0	0
AT1G18290	10.9594	-0.540433	1.33666	-0.404316	0.685981	0.865081	4.92088	25.9023	7.88993	19.143	4.77206	3.12795
AT1G18300	3214.92	-0.639775	0.203009	-3.15146	0.00162454	0.0169788	3565.53	5109.07	3073.13	2610.41	2411.8	2519.57
AT1G18310	15.1592	0.601514	1.58084	0.380503	0.703572	0.87496	21.7925	0	14.2019	33.0652	0	21.8957
AT1G18320	9.88468	0.434318	1.54649	0.280842	0.778832	0.912395	0	15.7941	9.46791	3.48055	13.3618	17.2037
AT1G18330	143.859	-1.05325	0.421154	-2.50087	0.0123889	0.0758299	194.726	181.316	205.138	144.443	68.7177	68.815
AT1G18335	388.539	0.357944	0.26417	1.35498	0.175425	0.42086	341.65	303.878	376.349	375.899	414.215	519.24
AT1G18340	285.193	0.520472	0.345911	1.50464	0.132416	0.356862	308.61	137.724	257.212	280.184	364.586	362.843
AT1G18350	2.4868	0.135397	3.41508	0.0396468	0.968375	NA	0	0	7.10093	0	0	7.81988
AT1G18360	140.346	-0.491038	0.386131	-1.27169	0.203485	0.458722	154.656	183.843	153.065	102.676	99.2589	148.578
AT1G18370	3.68197	-4.86169	3.28025	-1.48211	0.138311	0.366241	0	0	22.0918	0	0	0
AT1G18382	6.1194	1.94328	1.77741	1.09332	0.274253	0.541541	2.10895	3.15882	2.36698	0	18.1338	10.9478
AT1G18390	848.244	-0.0893456	0.209261	-0.426958	0.66941	0.855083	838.659	854.144	931.8	687.408	865.652	911.798
AT1G18400	128.516	-1.5181	0.435429	-3.48645	0.000489481	0.00661057	180.667	140.251	251.689	46.9874	81.1251	70.3789
AT1G18410	6.79298	0.460174	1.72624	0.266576	0.789796	0.91792	8.4358	0	8.67892	10.4416	3.81765	9.38386
AT1G18415	13.4502	-0.82105	1.16707	-0.703513	0.481736	0.730922	28.8223	8.84469	14.2019	6.96109	17.1794	4.69193
AT1G18420	0	NA	NA	NA	NA	NA	0	0	0	0	0	0
AT1G18430	0	NA	NA	NA	NA	NA	0	0	0	0	0	0
AT1G18440	201.043	-0.907335	0.342086	-2.65236	0.00799316	0.0552878	319.154	224.908	243.799	125.3	167.977	125.118
AT1G18450	765.132	0.161263	0.231355	0.697037	0.48578	0.734286	885.056	640.608	640.662	938.008	748.26	738.197
AT1G18460	1062.24	0.657605	0.277067	2.37345	0.0176227	0.097148	814.055	810.553	850.534	743.097	1847.74	1307.48
AT1G18470	1594.54	0.533195	0.235789	2.26133	0.0237391	0.119034	1369.41	1125.17	1417.82	1315.65	2501.52	1837.67
[truncated: 31,611 more rows]
