# Supplementary material for: Companion cells with high florigen production express other small proteins and reveal a nitrogen-sensitive FT repressor
Source: bioRxiv preprint, doi:10.1101/2024.08.17.608367, version 2 (2025-08-08)
Supplement: Supplemental data 2 [file 608367_file04.xlsx]

## Sheet: 35Sc_v_SUCc
Row.names	baseMean	log2FoldChange	lfcSE	stat	pvalue	padj	35S_C1.counts	35S_C2.counts	35S_C3.counts	SUC2_C1.counts	SUC2_C2.counts	SUC2_C3.counts
AT1G01010	65.6456	1.91715	0.629015	3.04785	0.00230482	0.0394428	14.4022	32.5924	35.4363	58.8381	77.1769	175.428
AT1G01020	1383.03	0.197682	0.189832	1.04135	0.297712	0.637318	1438.62	1149.43	1277.52	1452.32	1330.25	1650.04
AT1G01030	191.465	-0.879452	0.359675	-2.44513	0.01448	0.128779	264.84	204.246	274.404	94.1409	172.596	138.562
AT1G01040	578.956	-0.588277	0.236255	-2.49001	0.0127741	0.118615	827.324	620.705	637.853	423.634	439.207	525.012
AT1G01046	0	NA	NA	NA	NA	NA	0	0	0	0	0	0
AT1G01050	1685.42	0.0289605	0.18228	0.15888	0.873764	0.9656	1642.65	1781.72	1580.09	1589.61	1970.12	1548.34
AT1G01060	155.181	-0.862369	0.456398	-1.88951	0.0588233	0.287419	184.828	220.904	194.445	99.0441	181.015	50.8486
AT1G01070	7.75498	1.25941	1.79383	0.70208	0.482629	0.790926	12.8019	0	0.908622	14.7095	16.8386	1.27121
AT1G01073	0.812961	2.21783	3.98619	0.55638	0.577951	NA	0.80012	0	0	0	2.80643	1.27121
AT1G01080	360.732	0.196246	0.329063	0.596379	0.550922	0.82956	474.471	202.073	332.556	426.576	381.675	347.042
AT1G01090	919.71	-0.368916	0.225682	-1.63467	0.102118	0.383654	978.547	1225.48	906.805	976.712	722.656	708.067
AT1G01100	1109.14	-0.400956	0.21272	-1.8849	0.059443	0.289306	1018.55	1397.13	1370.2	826.675	1074.86	967.394
AT1G01110	33.8397	0.579961	1.21237	0.478368	0.632388	0.872547	76.0114	0	5.45173	66.6831	29.4675	25.4243
AT1G01115	1.57108	4.39696	3.94115	1.11565	0.264571	NA	0	0	0	0	5.61286	3.81364
AT1G01120	831.051	0.439019	0.208016	2.11051	0.0348148	0.215993	767.315	599.701	749.613	870.803	992.074	1006.8
AT1G01130	483.022	-0.051615	0.280637	-0.183921	0.854076	0.959742	412.062	652.573	409.788	418.731	426.578	578.403
AT1G01140	7790.61	-0.176034	0.147762	-1.19133	0.233524	0.571111	8557.28	8334.25	7905.01	7879.4	7288.3	6779.39
AT1G01150	18.0294	0.495125	0.981983	0.504209	0.614114	0.864545	15.2023	7.96704	21.8069	17.6514	11.2257	34.3228
AT1G01160	1079.71	0.0871561	0.194536	0.448021	0.654138	0.882635	1186.58	1053.82	900.444	1076.74	1112.75	1147.91
AT1G01170	1706.01	-0.74916	0.196533	-3.81188	0.000137912	0.00522796	2090.71	2373.45	1953.54	1367.98	1427.07	1023.33
AT1G01180	348.015	-0.304903	0.270376	-1.1277	0.259446	0.60095	437.666	404.146	311.657	282.423	311.514	340.686
AT1G01183	2.0003	-4.1743	3.92471	-1.06359	0.287513	NA	12.0018	0	0	0	0	0
AT1G01190	0.151437	-0.384446	4.08047	-0.0942159	0.924938	NA	0	0	0.908622	0	0	0
AT1G01200	0	NA	NA	NA	NA	NA	0	0	0	0	0	0
AT1G01210	225.939	-0.707277	0.380798	-1.85736	0.0632605	0.297394	316.047	313.612	211.709	247.12	164.176	102.968
AT1G01220	314.075	-0.255782	0.295932	-0.864327	0.387408	0.720138	388.058	346.928	289.85	256.926	366.239	236.446
AT1G01225	30.0498	1.05176	1.24926	0.841906	0.39984	0.729387	0	55.7693	2.72587	19.6127	32.274	69.9168
AT1G01230	644.833	0.179304	0.222282	0.806652	0.419867	0.746261	516.077	640.985	656.934	607.013	717.043	730.948
AT1G01240	1531.95	0.0731551	0.173366	0.421969	0.673048	0.888825	1541.03	1506.5	1431.08	1430.75	1595.46	1686.9
AT1G01250	38.0102	-0.337959	0.64763	-0.52184	0.601782	0.857776	43.2065	40.5595	43.6139	33.3416	26.6611	40.6789
AT1G01260	688.65	0.204546	0.242871	0.8422	0.399676	0.729233	468.07	690.236	761.425	719.786	797.027	695.354
AT1G01270	0.621289	-0.849667	3.99818	-0.212513	0.831707	NA	1.60024	0.724277	0	0	1.40322	0
AT1G01280	0	NA	NA	NA	NA	NA	0	0	0	0	0	0
AT1G01290	796.772	-0.395585	0.230186	-1.71855	0.0856967	0.349167	1127.37	777.873	810.491	684.483	768.962	611.454
AT1G01300	262.892	-1.34823	0.315238	-4.27686	1.9e-05	0.00119829	393.659	401.249	337.099	117.676	131.902	195.767
AT1G01305	4.184	-0.47114	2.12592	-0.221617	0.824612	0.950112	0.80012	13.7613	0	3.92254	2.80643	3.81364
AT1G01310	20.3642	0.587492	1.20737	0.486589	0.62655	0.870479	0	33.3167	15.4466	20.5933	21.0482	31.7804
AT1G01320	2722.8	-0.0238049	0.185788	-0.128129	0.898047	0.972828	3160.47	2585.67	2488.72	2537.88	3161.45	2402.6
AT1G01340	76.2384	1.32402	0.777955	1.70192	0.0887708	0.356182	80.8121	3.62138	46.3397	158.863	108.048	59.7471
AT1G01350	312.128	-0.0259078	0.306527	-0.0845205	0.932643	0.984557	232.035	423.702	288.942	327.532	303.095	297.464
AT1G01355	47.4593	0.840029	0.657801	1.27703	0.201593	0.532786	51.2077	36.2138	14.538	67.6638	61.7415	53.391
AT1G01360	311.167	1.00574	0.320382	3.1392	0.00169411	0.0315033	193.629	144.855	282.581	356.951	409.739	479.248
AT1G01370	12.9147	-3.85933	1.55937	-2.47493	0.0133262	0.121493	12.8019	51.4236	8.1776	0	0	5.08486
AT1G01380	1.82226	2.36438	3.44629	0.686065	0.492672	NA	0	0	1.81724	7.84507	0	1.27121
AT1G01390	55.3993	0.826904	0.742793	1.11324	0.265607	0.606647	76.0114	17.3826	26.35	66.6831	119.273	26.6955
AT1G01400	0	NA	NA	NA	NA	NA	0	0	0	0	0	0
AT1G01410	0.847476	3.50797	3.97017	0.883582	0.376922	NA	0	0	0	0	0	5.08486
AT1G01420	251.617	-0.593931	0.328603	-1.80744	0.0706929	0.315368	373.656	205.695	328.921	195.146	183.821	222.463
AT1G01430	4335.62	0.0928463	0.176039	0.52742	0.597902	0.855845	4027	4518.04	4042.46	3848.99	4241.92	5335.29
AT1G01440	746.795	0.680329	0.201573	3.37511	0.000737867	0.017666	576.086	585.215	560.62	947.293	825.091	986.463
AT1G01448	752.119	0.655926	0.243055	2.69868	0.00696154	0.0817095	463.269	572.903	715.994	795.294	864.381	1100.87
AT1G01450	0	NA	NA	NA	NA	NA	0	0	0	0	0	0
AT1G01453	4.14298	-1.54911	2.53573	-0.610911	0.541258	0.824799	0	9.41559	9.08622	0	0	6.35607
AT1G01460	184.533	-1.26841	0.562849	-2.25355	0.0242244	0.174193	75.2113	225.25	481.57	52.9542	123.483	148.732
AT1G01470	12769.6	0.0514484	0.195291	0.263444	0.792208	0.937833	9963.89	13226.7	14434.4	10442.8	13334.8	15215.2
AT1G01471	4.78341	0.711463	2.78428	0.255528	0.798315	0.940016	0	0	10.9035	0	0	17.797
AT1G01480	69.4496	-4.14569	0.716681	-5.78457	7.27e-09	1.63e-06	230.435	89.086	74.507	2.9419	7.01608	12.7121
AT1G01490	2267.31	-0.0680476	0.183545	-0.370741	0.710831	0.905252	2546.78	2199.63	2217.04	2457.47	1831.2	2351.75
AT1G01500	409.75	0.0309873	0.273398	0.113341	0.90976	0.976552	452.868	417.908	345.276	402.06	325.546	514.842
AT1G01510	237.646	0.115889	0.354349	0.327049	0.743631	0.918076	168.025	277.398	238.968	288.306	290.466	162.715
AT1G01520	153.583	0.0342533	0.366451	0.093473	0.925528	0.982662	153.623	155.719	145.38	113.754	185.225	167.8
AT1G01530	2.91759	-0.116263	3.25021	-0.0357709	0.971465	0.99392	0	0	9.08622	0	8.4193	0
AT1G01540	736.248	0.0847933	0.240851	0.352058	0.724795	0.910705	556.883	843.782	743.253	746.263	641.27	886.037
AT1G01550	7149.49	0.298951	0.145566	2.05372	0.0400025	0.234245	6083.31	6472.86	6677.46	7469.49	8281.78	7912.04
AT1G01560	205.69	0.144467	0.372763	0.387557	0.698344	0.899558	200.03	242.633	142.654	151.018	291.869	205.937
AT1G01570	29.26	-0.113771	0.812679	-0.139995	0.888664	0.970041	27.2041	15.2098	49.0656	34.3222	15.4354	34.3228
AT1G01580	1.22226	1.16252	3.88837	0.298973	0.764961	NA	0.80012	1.44855	0	0	0	5.08486
AT1G01590	4.30194	0.173854	2.26499	0.0767569	0.938817	0.986674	4.80072	7.24277	0	0	11.2257	2.54243
AT1G01600	0.957152	-0.341753	3.92458	-0.08708	0.930608	NA	3.20048	0	0	0	0	2.54243
AT1G01610	274.519	0.614172	0.385337	1.59385	0.110969	0.399794	168.825	180.345	301.662	207.894	286.256	502.13
AT1G01620	6542.07	0.708577	0.226216	3.1323	0.00173444	0.0320822	4100.61	5710.92	5089.19	6683.02	6446.37	11222.3
AT1G01630	535.906	0.28069	0.251021	1.11819	0.263485	0.604717	510.477	471.504	469.758	528.562	481.303	753.83
AT1G01640	9.90338	-0.0647289	1.45944	-0.0443518	0.964624	0.99299	5.60084	16.6584	8.1776	13.7289	0	15.2546
AT1G01650	622.814	-0.376338	0.284661	-1.32205	0.18615	0.514165	591.289	678.647	840.475	401.079	458.852	766.542
AT1G01660	4.34307	-2.62262	2.47027	-1.06167	0.288384	0.628917	22.4034	0	0	0.980634	1.40322	1.27121
AT1G01670	8.59454	0.451638	1.63033	0.277022	0.781763	0.933795	6.40096	0	15.4466	7.84507	2.80643	19.0682
AT1G01680	11.8517	-0.236566	1.98845	-0.11897	0.905299	0.975739	38.4058	0	0	0	9.82251	22.8819
AT1G01690	27.3788	0.0959439	0.860432	0.111507	0.911215	0.977116	8.0012	40.5595	30.8931	36.2835	29.4675	19.0682
AT1G01695	1.90118	-0.0662613	3.762	-0.0176133	0.985947	NA	0	5.79421	0	0	5.61286	0
AT1G01700	40.9452	0.708281	0.918163	0.771411	0.440463	0.761115	52.0078	1.44855	39.9794	59.8187	36.4836	55.9334
AT1G01710	593.13	-0.0562732	0.224367	-0.250808	0.801963	0.94184	666.5	518.582	628.766	528.562	606.189	610.183
AT1G01720	5626.39	-0.250533	0.217154	-1.15372	0.248617	0.587035	4128.62	6509.07	7703.3	4697.24	5134.37	5585.72
AT1G01725	593.103	-0.125121	0.296489	-0.422009	0.673018	0.888825	589.688	501.924	764.151	356.951	604.786	741.118
AT1G01730	528.865	-0.152816	0.31482	-0.485409	0.627387	0.870479	305.646	595.355	769.603	462.859	512.174	527.554
AT1G01740	126.379	0.799544	0.394978	2.02427	0.0429422	0.243743	77.6116	113.711	85.4105	180.437	133.306	167.8
AT1G01750	70.986	-0.560024	0.559132	-1.0016	0.316539	0.655947	135.22	66.6334	51.7915	49.0317	53.3222	69.9168
AT1G01760	122.01	0.204635	0.403544	0.507095	0.612088	0.863336	116.818	117.333	106.309	157.882	92.6123	141.105
AT1G01770	872.711	0.029762	0.252776	0.117741	0.906273	0.97594	852.128	966.185	771.42	592.303	972.429	1081.8
AT1G01780	308.925	-0.48723	0.339249	-1.4362	0.150945	0.46666	440.866	415.735	224.43	196.127	262.401	313.99
AT1G01790	1307.64	0.405883	0.265414	1.52925	0.126204	0.425589	1212.18	868.408	1293.88	1388.58	2068.34	1014.43
AT1G01800	1192.53	-0.0832596	0.202387	-0.411389	0.680787	0.891732	1248.99	1051.65	1380.2	1146.36	1314.81	1013.16
AT1G01810	47.4657	0.550707	0.616688	0.893006	0.371854	0.707668	43.2065	48.5265	23.6242	54.9155	68.7576	45.7637
AT1G01820	469.325	0.581775	0.236184	2.46323	0.0137693	0.124242	377.657	364.311	386.164	562.884	485.513	639.421
AT1G01830	357.471	-1.3492	0.328258	-4.11017	3.95e-05	0.00206185	644.097	483.092	414.332	269.674	127.693	205.937
AT1G01840	88.9512	-0.10389	0.508575	-0.204277	0.838137	0.955037	85.6128	65.9092	125.39	117.676	86.9994	52.1198
AT1G01860	126.53	1.23917	0.443418	2.79458	0.00519669	0.0677112	60.009	70.9791	95.4053	239.275	106.644	186.869
AT1G01870	0	NA	NA	NA	NA	NA	0	0	0	0	0	0
AT1G01880	26.0514	-0.00566427	1.10312	-0.00513476	0.995903	0.999234	1.60024	44.1809	32.7104	48.0511	5.61286	24.1531
AT1G01890	0.965702	-3.12956	3.9437	-0.79356	0.427452	NA	0	5.79421	0	0	0	0
AT1G01900	7.94361	0.156289	2.1526	0.0726045	0.942121	0.98732	0	22.4526	0	0	11.2257	13.9834
AT1G01910	619.351	0.57879	0.234161	2.47176	0.0134451	0.122206	460.869	581.594	447.951	814.907	618.818	791.967
AT1G01920	240.249	0.0828051	0.332605	0.248959	0.803392	0.942728	323.248	183.242	193.536	248.1	258.192	235.175
AT1G01930	200.625	0.442034	0.360467	1.22628	0.220092	0.554879	204.031	105.744	200.805	214.759	234.337	244.073
AT1G01940	191.8	-0.217646	0.34846	-0.624594	0.532238	0.819809	172.026	258.567	188.085	197.107	196.45	138.562
AT1G01950	768.775	0.568786	0.217392	2.61641	0.00888607	0.0956847	640.896	634.466	582.427	1053.2	954.187	747.474
AT1G01960	205.379	0.501397	0.348536	1.43858	0.150269	0.465754	227.234	120.23	162.643	223.585	259.595	238.988
AT1G01970	158.042	0.00889181	0.384504	0.0231254	0.98155	0.996173	106.416	159.341	207.166	172.592	164.176	138.562
AT1G01980	2.13365	-4.26739	3.9236	-1.08762	0.276762	NA	12.8019	0	0	0	0	0
AT1G01990	432.457	0.253393	0.262429	0.965568	0.33426	0.673669	379.257	333.891	471.575	553.078	406.933	450.01
AT1G02000	212.605	0.447525	0.361526	1.23788	0.215761	0.549463	157.624	140.51	241.693	241.236	311.514	183.055
AT1G02010	373.119	0.427512	0.335389	1.27468	0.202424	0.533777	460.069	231.044	263.5	443.247	533.222	307.634
AT1G02020	289.926	0.417581	0.32973	1.26643	0.205358	0.538178	210.432	175.999	358.906	339.299	326.949	327.973
AT1G02030	11.7098	-2.37301	1.67002	-1.42094	0.155334	0.473304	41.6062	14.4855	2.72587	0	0	11.4409
AT1G02040	1.16935	3.96581	3.95304	1.00323	0.31575	NA	0	0	0	0	7.01608	0
AT1G02050	66.3752	0.583019	0.522339	1.11617	0.26435	0.605324	60.009	41.2838	58.1518	79.4314	99.6283	59.7471
AT1G02060	19.5485	-1.56919	0.946803	-1.65736	0.0974468	0.374177	28.8043	15.2098	43.6139	6.86444	12.6289	10.1697
AT1G02065	9.43131	-1.90014	1.87367	-1.01413	0.310522	0.650455	4.80072	39.1109	0.908622	11.7676	0	0
AT1G02070	2.66707	-4.58929	3.68883	-1.2441	0.213462	0.547118	16.0024	0	0	0	0	0
AT1G02074	0	NA	NA	NA	NA	NA	0	0	0	0	0	0
AT1G02080	308.227	0.391609	0.326719	1.19861	0.230679	0.567578	355.253	218.732	225.338	268.694	454.642	326.702
AT1G02090	641.552	0.278607	0.231307	1.20449	0.228401	0.5649	651.298	622.154	465.214	634.47	705.818	770.356
AT1G02100	1900.54	0.126193	0.162902	0.774658	0.438542	0.759852	1755.46	1786.79	1909.92	1897.53	2050.1	2003.43
AT1G02110	188.753	-0.469367	0.336544	-1.39467	0.163116	0.484521	232.835	225.974	198.08	121.599	182.418	171.614
AT1G02120	1240.09	-0.207008	0.202795	-1.02077	0.307361	0.64745	1596.24	1126.25	1263.89	1063.01	1161.86	1229.26
AT1G02130	832.838	-0.267903	0.208078	-1.28751	0.197915	0.530393	853.728	989.362	886.815	743.321	658.108	865.697
AT1G02136	3.88178	-2.20551	2.97915	-0.740313	0.45911	0.774197	0	0	19.0811	0	4.20965	0
AT1G02140	2475.37	-0.0603559	0.197457	-0.305666	0.759859	0.923286	2134.72	3209.99	2236.12	2449.62	2500.53	2321.24
AT1G02145	841.861	-0.186309	0.199396	-0.934368	0.350114	0.688175	958.544	848.128	881.363	762.933	875.607	724.592
AT1G02150	762.346	0.0628944	0.228319	0.275467	0.782957	0.934186	589.688	908.243	738.71	734.495	823.688	779.255
AT1G02160	395.601	-0.35589	0.278955	-1.2758	0.202028	0.533093	563.284	337.513	431.595	320.667	335.369	385.178
AT1G02170	1196.74	0.499383	0.211644	2.35954	0.0182977	0.147087	829.724	956.769	1188.48	1326.8	1615.1	1263.59
AT1G02180	28.3925	0.792744	1.10149	0.719704	0.471707	0.784094	28.8043	0	33.619	31.3803	43.4997	33.0516
AT1G02190	4.7921	-0.279854	1.71733	-0.162959	0.870551	0.96474	4.0006	3.62138	8.1776	3.92254	1.40322	7.62729
AT1G02205	19.1312	-2.12228	1.11309	-1.90665	0.0565658	0.282146	42.4064	31.1439	19.9897	9.80634	0	11.4409
AT1G02210	0.133353	-0.384446	4.08047	-0.0942159	0.924938	NA	0.80012	0	0	0	0	0
AT1G02220	91.5684	-0.547319	0.444325	-1.2318	0.218024	0.552242	120.818	84.7404	120.847	81.3926	72.9672	68.6456
AT1G02228.1	2.26701	-4.35483	3.91046	-1.11364	0.265436	NA	13.602	0	0	0	0	0
AT1G02230	3.69525	-0.243067	3.00541	-0.0808766	0.93554	0.985608	12.0018	0	0	0	0	10.1697
AT1G02250	4.00722	5.74769	2.56022	2.245	0.0247684	0.176449	0	0	0	0.980634	15.4354	7.62729
AT1G02260	390.067	-0.128753	0.316139	-0.407268	0.683811	0.892688	555.283	244.805	422.509	370.68	374.659	372.466
AT1G02270	1473.75	0.265768	0.194727	1.36482	0.17231	0.496825	1092.16	1516.64	1406.55	1642.56	1488.81	1695.8
AT1G02280	672.467	-0.407921	0.278819	-1.46303	0.143459	0.454584	505.676	984.292	811.399	678.599	470.077	584.759
AT1G02290	34.9659	-0.193122	0.70206	-0.27508	0.783255	0.934186	24.8037	36.2138	50.8828	26.4771	29.4675	41.9501
AT1G02300	1937.13	0.0585076	0.177385	0.329833	0.741526	0.916817	2101.92	1706.4	1885.39	1904.39	1838.21	2186.49
AT1G02305	1001.19	0.390841	0.205992	1.89736	0.0577806	0.285123	847.327	964.012	786.867	963.963	1153.44	1291.55
AT1G02310	40.2894	0.575913	0.689156	0.835679	0.403336	0.732765	19.2029	47.078	30.8931	67.6638	33.6772	43.2213
AT1G02320	1.26117	0.103842	3.87093	0.026826	0.978599	NA	0	3.62138	0	0	1.40322	2.54243
AT1G02330	340.63	0.0936571	0.274205	0.341559	0.732683	0.913484	286.443	319.406	382.53	292.229	383.078	380.093
AT1G02335	4.68629	3.48954	2.26033	1.54382	0.122631	0.421007	0.80012	1.44855	0	0	18.2418	7.62729
AT1G02340	1072.17	-0.137496	0.284385	-0.483483	0.628752	0.870957	1175.38	1179.85	1013.11	569.748	1076.27	1418.68
AT1G02350	235.977	-0.32558	0.365792	-0.890068	0.373429	0.709192	172.026	386.039	228.973	199.069	244.16	185.597
AT1G02360	35.8566	-1.34631	0.72039	-1.86887	0.0616411	0.293452	52.8079	61.5635	39.9794	22.5546	28.0643	10.1697
AT1G02370	31.1923	0.337424	1.04166	0.323928	0.745992	0.91962	3.20048	11.5884	68.1466	46.0898	9.82251	48.3062
AT1G02380	252.804	0.207759	0.332005	0.62577	0.531466	0.819559	285.643	161.514	257.14	275.558	221.708	315.261
AT1G02390	1501.86	0.216404	0.214534	1.00872	0.313111	0.65257	1622.64	1182.74	1362.02	1260.11	1744.2	1839.45
AT1G02391	0	NA	NA	NA	NA	NA	0	0	0	0	0	0
AT1G02400	2232.72	-0.215927	0.239167	-0.902827	0.366618	0.703037	1955.49	3342.54	1899.93	1974.02	1784.89	2439.46
AT1G02405	20.4124	-0.188478	0.954217	-0.197521	0.84342	0.956109	25.6038	8.69132	30.8931	9.80634	18.2418	29.2379
AT1G02410	761.811	-0.228327	0.214754	-1.0632	0.28769	0.628407	786.518	714.861	964.956	719.786	733.882	650.862
AT1G02420	12.0107	1.66402	1.23228	1.35036	0.176901	0.503462	1.60024	10.1399	5.45173	6.86444	23.8547	24.1531
AT1G02430	41.1499	-0.339473	0.697278	-0.486855	0.626361	0.870479	25.6038	44.1809	68.1466	38.2447	49.1126	21.6106
AT1G02440	7.72088	1.49261	1.4681	1.01669	0.309299	0.649268	3.20048	7.96704	0.908622	13.7289	15.4354	5.08486
AT1G02450	1.20218	1.79452	3.92206	0.457546	0.647279	NA	1.60024	0	0	0	5.61286	0
AT1G02460	0.40006	-1.85372	3.99557	-0.463944	0.642688	NA	2.40036	0	0	0	0	0
AT1G02470	160.378	-0.146588	0.426029	-0.344081	0.730785	0.91331	212.832	196.279	96.3139	175.534	179.612	101.697
AT1G02475	1515.57	-0.137972	0.201134	-0.685972	0.492731	0.796915	1465.82	1630.35	1668.23	1617.07	1585.63	1126.3
AT1G02480	0	NA	NA	NA	NA	NA	0	0	0	0	0	0
AT1G02490	0	NA	NA	NA	NA	NA	0	0	0	0	0	0
AT1G02500	4200.42	0.157249	0.161104	0.976069	0.32903	0.668886	3638.15	4243.54	4033.37	4259.88	4115.63	4911.97
AT1G02510	3.81449	1.46441	2.33106	0.628216	0.529863	0.818841	1.60024	0	4.54311	7.84507	0	8.8985
AT1G02520	0.436227	-1.96708	3.98894	-0.493133	0.621918	NA	0.80012	0	1.81724	0	0	0
AT1G02530	0	NA	NA	NA	NA	NA	0	0	0	0	0	0
AT1G02540	0	NA	NA	NA	NA	NA	0	0	0	0	0	0
AT1G02550	0	NA	NA	NA	NA	NA	0	0	0	0	0	0
AT1G02560	1583.96	-0.0626332	0.193496	-0.323693	0.746171	0.919643	1305	1754.2	1796.35	1620.01	1448.12	1580.12
AT1G02570	1.93869	4.71188	3.65493	1.28919	0.197333	NA	0	0	0	8.82571	2.80643	0
AT1G02575	2.0003	-4.1743	3.92471	-1.06359	0.287513	NA	12.0018	0	0	0	0	0
AT1G02580	0	NA	NA	NA	NA	NA	0	0	0	0	0	0
AT1G02590	20.8879	1.51422	1.09302	1.38535	0.165945	0.488582	2.40036	25.3497	4.54311	10.787	36.4836	45.7637
AT1G02600	0.702186	3.25504	3.98219	0.8174	0.4137	NA	0	0	0	2.9419	0	1.27121
AT1G02610	7442.72	0.558602	0.196658	2.84048	0.00450455	0.0616275	5833.67	6639.44	5584.39	8168.68	11392.7	7037.44
AT1G02620	772.172	1.1878	0.34864	3.40696	0.000656905	0.0160934	205.631	454.121	754.156	1123.81	1125.38	969.937
AT1G02630	0	NA	NA	NA	NA	NA	0	0	0	0	0	0
AT1G02640	667.137	1.15658	0.320147	3.61265	0.000303079	0.00929485	256.839	575.8	406.154	608.974	976.638	1178.42
AT1G02650	44.6725	0.335928	0.680632	0.493554	0.621621	0.868037	63.2095	24.6254	30.8931	73.5476	35.0804	40.6789
AT1G02660	3676.81	0.126929	0.157339	0.806724	0.419825	0.746261	3282.09	3840.84	3421.87	3633.25	3837.8	4045.01
AT1G02670	38.387	0.301964	0.712133	0.424027	0.671546	0.888825	24.0036	38.3867	40.888	45.1092	19.645	62.2895
AT1G02680	932.623	-0.412164	0.194327	-2.12098	0.0339233	0.213162	1039.36	1106.69	1049.46	892.377	785.801	722.05
AT1G02681	10.5692	1.53337	1.72072	0.891117	0.372867	0.708635	0	0	16.3552	8.82571	28.0643	10.1697
AT1G02690	26.8816	0.336923	1.31205	0.256791	0.79734	0.939909	1.60024	69.5305	0	22.5546	29.4675	38.1364
AT1G02700	3.55854	-1.5991	2.76414	-0.578517	0.562915	0.8361	16.0024	0	0	0	2.80643	2.54243
AT1G02710	2.69074	-2.43106	3.36441	-0.722581	0.469937	0.78296	13.602	0	0	0	0	2.54243
AT1G02720	44.9652	0.676751	0.694969	0.973787	0.330162	0.669731	17.6026	51.4236	34.5276	28.4384	72.9672	64.8319
AT1G02730	53.8202	-1.83494	2.78767	-0.658234	0.510388	0.80759	0	208.592	43.6139	5.88381	0	64.8319
AT1G02740	178.218	0.294788	0.423062	0.696796	0.485931	0.79264	219.233	118.781	142.654	277.519	199.257	111.867
AT1G02750	407.499	0.43083	0.252389	1.70701	0.0878201	0.35358	300.045	370.83	370.718	484.433	404.126	514.842
AT1G02760	0	NA	NA	NA	NA	NA	0	0	0	0	0	0
AT1G02770	28.2864	0.838736	1.1281	0.743494	0.457183	0.772624	20.8031	39.8352	0	15.6901	60.3383	33.0516
AT1G02780	2682.54	-0.156176	0.176062	-0.887049	0.375052	0.710865	2353.95	3198.41	2930.31	2517.29	2489.31	2605.99
AT1G02790	0.908192	-3.03714	3.94613	-0.76965	0.441507	NA	4.0006	1.44855	0	0	0	0
AT1G02800	0.133353	-0.384446	4.08047	-0.0942159	0.924938	NA	0.80012	0	0	0	0	0
AT1G02810	0.467739	2.62903	4.02248	0.653585	0.513379	NA	0	0	0	0	2.80643	0
AT1G02813	1.40322	4.23061	3.94533	1.07231	0.283582	NA	0	0	0	0	8.4193	0
AT1G02816	628.489	-0.366734	0.286777	-1.27881	0.200963	0.53194	433.665	856.095	834.115	523.659	482.706	640.692
AT1G02820	404.665	-0.702828	0.368973	-1.90482	0.0568031	0.282794	638.496	417.908	447.042	292.229	478.497	153.817
AT1G02830	0	NA	NA	NA	NA	NA	0	0	0	0	0	0
AT1G02840	1964.29	-0.180465	0.189764	-0.950998	0.341606	0.68053	2450.77	1807.79	2001.69	1696.5	2068.34	1760.63
AT1G02850	1326.18	-0.786643	0.201311	-3.90759	9.32e-05	0.00393604	2049.91	1474.63	1512.86	1022.8	975.235	921.631
AT1G02860	1117.55	0.483934	0.253747	1.90715	0.0565011	0.28189	953.743	902.449	939.515	1172.84	903.671	1833.09
AT1G02870	77.8375	-0.751852	0.609701	-1.23315	0.21752	0.551755	124.019	136.164	32.7104	65.7025	71.564	36.8652
AT1G02880	1241.46	0.535662	0.265014	2.02126	0.0432525	0.24446	918.538	890.136	1232.09	1452.32	2000.99	954.682
AT1G02890	479.821	0.718082	0.310648	2.31156	0.0208019	0.159153	549.682	264.361	274.404	628.587	621.625	540.266
AT1G02900	90.7037	1.04506	0.536212	1.94896	0.0513003	0.267801	98.4148	31.8682	47.2483	95.1215	157.16	114.409
AT1G02910	1291.92	0.372783	0.190183	1.96012	0.0499812	0.264129	1154.57	1099.45	1123.06	1349.35	1711.92	1313.16
AT1G02920	2109.22	-1.10684	0.250113	-4.42535	9.63e-06	0.000732376	3634.94	2590.74	2416.03	1021.82	1128.19	1863.6
AT1G02930	2853.55	-0.580942	0.244397	-2.37704	0.0174522	0.143241	3527.73	3343.98	3390.07	2163.28	1463.55	3232.7
AT1G02940	5.62102	0.299821	2.15288	0.139265	0.889241	0.970093	1.60024	0	13.6293	15.6901	2.80643	0
AT1G02950	0.163439	1.53911	4.08047	0.377189	0.706033	NA	0	0	0	0.980634	0	0
AT1G02952	0	NA	NA	NA	NA	NA	0	0	0	0	0	0
AT1G02960	775.339	-0.0745148	0.247241	-0.301386	0.76312	0.924174	1013.75	629.396	742.344	620.741	792.817	852.985
AT1G02965	0.266707	-1.26943	4.03914	-0.314283	0.753306	NA	1.60024	0	0	0	0	0
AT1G02970	20.5391	-3.46715	1.37937	-2.51357	0.0119516	0.114198	4.80072	62.2878	46.3397	9.80634	0	0
AT1G02980	2.66707	-4.58929	3.68883	-1.2441	0.213462	0.547118	16.0024	0	0	0	0	0
AT1G02990	136.854	-0.644439	0.386469	-1.6675	0.0954145	0.369946	157.624	139.785	203.531	101.986	89.8058	128.393
AT1G03000	571.83	0.241478	0.216621	1.11475	0.264958	0.605794	542.481	483.092	546.99	649.18	638.463	570.775
AT1G03010	0	NA	NA	NA	NA	NA	0	0	0	0	0	0
AT1G03020	3.77366	-1.38174	2.12279	-0.650905	0.515108	0.810288	1.60024	9.41559	5.45173	4.90317	0	1.27121
AT1G03022	0	NA	NA	NA	NA	NA	0	0	0	0	0	0
AT1G03030	480.117	0.0431361	0.278021	0.155154	0.8767	0.96642	543.281	323.027	553.351	547.194	430.787	483.062
AT1G03040	608.023	0.329062	0.266665	1.23399	0.217206	0.551231	405.661	517.858	693.279	547.194	695.995	788.153
AT1G03050	14.3843	0.309163	1.3675	0.22608	0.82114	0.949018	8.0012	30.4196	0	13.7289	25.2579	8.8985
AT1G03055	286.093	-0.183795	0.32068	-0.573142	0.566549	0.838084	322.448	270.879	319.835	314.784	315.724	172.885
AT1G03060	130.48	-0.460205	0.512186	-0.898511	0.368913	0.70482	72.0108	260.74	120.847	151.018	84.193	94.0699
AT1G03070	5.56952	-3.627	2.38384	-1.5215	0.128136	0.428339	4.80072	26.074	0	0	0	2.54243
AT1G03080	705.588	0.0261972	0.295375	0.0886914	0.929327	0.983491	828.924	603.322	665.111	552.097	514.98	1069.09
AT1G03090	1828.07	0.788267	0.282716	2.78819	0.00530035	0.068849	1156.97	1109.59	1755.46	1438.59	2158.15	3349.65
AT1G03100	52.8226	2.46686	0.78435	3.1451	0.0016603	0.0310664	8.0012	23.1768	17.2638	25.4965	56.1286	186.869
AT1G03103	1.21133	-0.520337	3.88699	-0.133866	0.893508	NA	1.60024	0	2.72587	2.9419	0	0
AT1G03106	5.47065	-0.0279531	2.0827	-0.0134216	0.989291	0.998265	0	6.51849	9.99484	0	11.2257	5.08486
AT1G03110	146.376	0.123877	0.3984	0.310937	0.755848	0.922796	116.017	173.826	130.842	197.107	106.644	153.817
AT1G03120	88.8545	-0.26234	0.441576	-0.5941	0.552445	0.830323	110.417	91.9831	88.1363	72.5669	91.209	78.8153
AT1G03130	12639.3	-0.749049	0.21089	-3.55185	0.00038253	0.0108856	14458.2	17936.7	15151.3	10797.8	11078.4	6413.28
AT1G03140	478.367	0.196801	0.258749	0.760586	0.446905	0.765448	360.854	454.846	522.458	578.574	419.562	533.91
AT1G03150	676.498	0.374585	0.258021	1.45176	0.146568	0.459393	625.694	483.092	658.751	773.72	958.397	559.334
AT1G03160	879.821	0.406492	0.220463	1.84381	0.0652115	0.30283	624.094	714.861	931.337	971.809	1084.69	952.14
AT1G03170	16.2016	-0.172409	1.03287	-0.166923	0.867431	0.963876	5.60084	23.1768	22.7155	12.7482	12.6289	20.3394
AT1G03180	76.0305	-0.265987	0.49762	-0.534519	0.592983	0.853382	113.617	64.4606	70.8725	60.7993	70.1608	76.2729
AT1G03190	250.814	-0.183081	0.297515	-0.615366	0.538313	0.823102	221.633	319.406	258.957	234.372	231.531	238.988
AT1G03200	0.938807	0.44239	3.91816	0.112908	0.910104	NA	2.40036	0	0	1.96127	0	1.27121
AT1G03210	385.988	0.118427	0.314291	0.376808	0.706317	0.903636	511.277	267.982	330.738	306.939	434.997	463.993
AT1G03220	12221.7	-0.350461	0.161411	-2.17123	0.0299134	0.197755	14320.5	13207.9	13566.6	8982.61	11672	11580.8
AT1G03230	589.492	-0.597781	0.23305	-2.56503	0.0103167	0.105032	747.312	638.812	744.161	528.562	496.738	381.364
AT1G03240	0.601092	1.66726	4.02248	0.414486	0.678518	NA	0.80012	0	0	0	2.80643	0
AT1G03250	567.792	-0.0924603	0.218212	-0.423717	0.671772	0.888825	530.48	606.219	621.497	557.981	512.174	578.403
AT1G03260	157.302	-0.197656	0.407605	-0.484921	0.627733	0.870479	108.816	215.834	179.907	176.514	103.838	158.902
AT1G03270	19.6688	0.0151912	0.930815	0.0163203	0.986979	0.997513	8.80132	18.1069	31.8018	17.6514	23.8547	17.797
AT1G03280	434.015	-0.120177	0.246335	-0.487861	0.625648	0.870139	524.879	404.871	426.144	376.564	427.981	443.654
AT1G03290	550.943	0.0434098	0.215795	0.201163	0.840571	0.955807	523.278	544.656	559.711	529.542	600.576	547.894
AT1G03300	87.7986	0.475768	0.542255	0.877387	0.380277	0.714532	36.8055	126.024	57.2432	93.1603	108.048	105.511
AT1G03310	70.7457	0.0480537	0.507794	0.0946322	0.924607	0.982516	74.4112	52.8722	81.776	89.2377	57.5319	68.6456
AT1G03320	0.847476	3.50797	3.97017	0.883582	0.376922	NA	0	0	0	0	0	5.08486
AT1G03330	293.023	-0.355114	0.371446	-0.95603	0.339057	0.678017	478.472	249.875	258.049	253.004	352.207	166.529
AT1G03340	94.7633	-0.130535	0.508408	-0.256753	0.797369	0.939909	89.6134	83.2918	124.481	115.715	112.257	43.2213
AT1G03350	587.992	0.0440352	0.25638	0.171757	0.863628	0.962956	536.08	482.368	718.72	513.852	547.254	729.677
AT1G03360	75.8575	0.20731	0.512397	0.404589	0.68578	0.893936	62.4094	70.2548	79.0501	118.657	56.1286	68.6456
AT1G03365	362.488	0.081758	0.264538	0.30906	0.757276	0.922832	364.055	283.192	409.788	378.525	373.255	366.11
AT1G03370	1344.94	0.193345	0.209449	0.923111	0.35595	0.693805	1373.81	1317.46	1072.17	1211.08	1739.99	1355.11
AT1G03380	855.816	0.656855	0.202615	3.2419	0.00118737	0.0249747	724.909	610.565	656.934	922.777	1109.94	1109.77
AT1G03390	7.68958	-2.7268	1.93227	-1.41119	0.15819	0.477698	0	24.6254	15.4466	0.980634	0	5.08486
AT1G03400	1096.2	0.231304	0.193863	1.19313	0.23282	0.570315	940.941	972.703	1112.15	1224.81	1286.75	1039.85
AT1G03410	566.326	0.315507	0.232325	1.35804	0.17445	0.499794	534.48	417.908	561.528	583.477	690.382	610.183
AT1G03420.1	0	NA	NA	NA	NA	NA	0	0	0	0	0	0
AT1G03430	756.848	-0.319944	0.259293	-1.23391	0.217237	0.551242	1002.55	577.973	940.424	591.322	797.027	631.794
AT1G03440	166.792	-0.280492	0.389083	-0.720905	0.470968	0.783386	140.021	150.65	258.049	123.56	181.015	147.461
AT1G03445	20.5517	2.47044	1.22864	2.0107	0.0443569	0.247433	15.2023	0	3.63449	20.5933	67.3544	16.5258
AT1G03457	143.224	1.32314	0.584758	2.26272	0.0236532	0.171667	132.02	21.7283	91.7708	137.289	133.306	343.228
AT1G03470	103.947	-0.0343772	1.31898	-0.0260635	0.979207	0.995859	11.2017	178.896	125.39	22.5546	36.4836	249.158
AT1G03475	759.379	0.0868241	0.2275	0.381644	0.702726	0.901962	645.697	811.914	751.43	660.947	736.688	949.597
AT1G03490	0.908622	-3.02803	3.94638	-0.767292	0.442908	NA	0	0	5.45173	0	0	0
AT1G03495	48.4106	0.330564	0.662714	0.498804	0.617918	0.866144	20.003	52.1479	56.3346	33.3416	70.1608	58.4759
AT1G03502	1.50638	-2.55703	3.67961	-0.694917	0.487107	NA	4.0006	0	3.63449	0	1.40322	0
AT1G03506	4.01634	1.55375	2.32131	0.669343	0.503277	0.802574	1.60024	0	4.54311	3.92254	14.0322	0
AT1G03510	25.5073	0.944774	1.03519	0.912659	0.361422	0.698221	8.80132	40.5595	2.72587	25.4965	58.9351	16.5258
AT1G03515	0.345222	0.577335	4.08047	0.141487	0.887485	NA	0.80012	0	0	0	0	1.27121
AT1G03520	697.403	0.230295	0.275671	0.835398	0.403494	0.732989	413.662	730.071	781.415	609.954	816.672	832.646
AT1G03530	75.3509	0.0928142	0.506642	0.183195	0.854645	0.959769	84.0126	54.3207	80.8674	104.928	63.1447	64.8319
AT1G03540	16.1312	-0.333582	1.0288	-0.324244	0.745753	0.919438	32.0048	10.1399	11.8121	15.6901	18.2418	8.8985
AT1G03545	0	NA	NA	NA	NA	NA	0	0	0	0	0	0
AT1G03550	171.589	-0.343321	0.388595	-0.883492	0.376971	0.712016	244.037	146.304	185.359	127.482	117.87	208.479
AT1G03560	220.719	0.234241	0.358205	0.653932	0.513156	0.809118	150.423	201.349	257.14	243.197	168.386	303.82
AT1G03570	0	NA	NA	NA	NA	NA	0	0	0	0	0	0
AT1G03580	719.907	1.05453	0.329753	3.19794	0.00138411	0.0277467	500.875	436.014	467.032	854.132	507.964	1553.42
AT1G03590	377.605	0.0226808	0.306278	0.074053	0.940968	0.987273	492.074	381.694	249.871	362.835	336.772	442.383
AT1G03600	1885.33	-0.705225	0.242659	-2.90624	0.00365803	0.0531282	1979.5	2729.8	2302.45	1675.9	1695.08	929.258
AT1G03610	4495.67	0.139445	0.184608	0.755356	0.450036	0.767014	4026.2	4455.75	4352.3	4027.46	5862.64	4249.67
AT1G03620	58.3746	0.267026	0.648532	0.411739	0.680531	0.891732	82.4124	28.2468	48.157	33.3416	58.9351	99.1547
AT1G03630	1282.24	-0.354577	0.243872	-1.45394	0.145962	0.458926	1135.37	1515.19	1667.32	1367	1216.59	791.967
AT1G03640	0.629752	0.186275	4.00528	0.0465074	0.962906	NA	0	0	1.81724	1.96127	0	0
AT1G03650	49.1425	-0.650825	0.692084	-0.940384	0.347021	0.685088	78.4118	36.9381	64.5122	28.4384	68.7576	17.797
AT1G03660	0	NA	NA	NA	NA	NA	0	0	0	0	0	0
AT1G03670	3.01762	-1.58431	2.90078	-0.546167	0.584951	0.848667	13.602	0	0	1.96127	0	2.54243
AT1G03680	3108.03	-0.20332	0.199745	-1.0179	0.308726	0.64883	2629.19	3377.3	3973.4	2843.84	3321.41	2503.02
AT1G03687	216.996	0.250434	0.323516	0.774099	0.438872	0.760161	204.031	183.966	207.166	269.674	173.999	263.141
AT1G03700	0	NA	NA	NA	NA	NA	0	0	0	0	0	0
AT1G03710	4.65255	-0.680307	2.52546	-0.269379	0.787638	0.935663	0	0	17.2638	7.84507	2.80643	0
AT1G03720	0	NA	NA	NA	NA	NA	0	0	0	0	0	0
AT1G03730	1243.04	-0.561308	0.185866	-3.01996	0.00252809	0.0418416	1406.61	1421.75	1618.26	1083.6	900.865	1027.14
AT1G03740	1389.34	0.73241	0.260034	2.81659	0.0048536	0.0648449	1247.39	799.601	1085.8	1735.72	1171.69	2295.81
AT1G03743	10.5313	-0.0128757	1.52375	-0.00845004	0.993258	0.999038	13.602	0	18.1724	6.86444	4.20965	20.3394
AT1G03746	19.6479	-1.32099	0.933681	-1.41482	0.157122	0.475633	22.4034	27.5225	34.5276	17.6514	5.61286	10.1697
AT1G03750	66.4722	0.190113	0.504897	0.376538	0.706517	0.903636	53.608	56.4936	76.3242	71.5863	64.5479	76.2729
AT1G03760	19.717	1.36343	0.957699	1.42365	0.154547	0.472249	4.80072	17.3826	10.9035	36.2835	33.6772	15.2546
AT1G03770	24.0301	0.782732	0.985029	0.794628	0.42683	0.751809	12.0018	36.2138	4.54311	21.574	53.3222	16.5258
AT1G03780	9.11175	-1.14162	1.61897	-0.705151	0.480716	0.789847	1.60024	26.7982	9.08622	0	7.01608	10.1697
AT1G03790	0.40006	-1.85372	3.99557	-0.463944	0.642688	NA	2.40036	0	0	0	0	0
AT1G03800	4.3071	-0.142902	2.32125	-0.0615626	0.950911	0.989283	0	0	13.6293	6.86444	2.80643	2.54243
AT1G03810	0	NA	NA	NA	NA	NA	0	0	0	0	0	0
AT1G03820	0	NA	NA	NA	NA	NA	0	0	0	0	0	0
AT1G03830	39.6193	0.390302	0.70394	0.554453	0.579269	0.844875	48.8073	38.3867	15.4466	34.3222	57.5319	43.2213
AT1G03840	0.490317	2.75336	4.01307	0.686099	0.492651	NA	0	0	0	2.9419	0	0
AT1G03850	1389.57	-1.16825	0.307498	-3.79921	0.000145156	0.0054225	1492.22	2244.53	2031.68	431.479	898.058	1239.43
AT1G03860	505.253	0.25971	0.262086	0.990935	0.321718	0.660264	548.882	357.068	474.301	627.606	571.109	452.552
AT1G03870	1461.97	0.845059	0.28474	2.96783	0.00299911	0.0466366	982.547	879.996	1274.8	1615.1	1187.12	2832.27
AT1G03880	0	NA	NA	NA	NA	NA	0	0	0	0	0	0
AT1G03890	0	NA	NA	NA	NA	NA	0	0	0	0	0	0
AT1G03900	335.988	0.0129263	0.288625	0.044786	0.964278	0.992964	389.658	240.46	373.444	322.629	359.223	330.516
AT1G03905	131.303	0.973899	0.475474	2.04827	0.0405335	0.236261	104.016	55.7693	106.309	169.65	94.0155	258.057
AT1G03910	591.076	-0.0542905	0.267269	-0.203131	0.839033	0.955037	527.279	585.215	694.187	506.007	453.239	780.526
AT1G03920	3.64627	-5.03831	2.56803	-1.96194	0.0497696	0.2634	8.80132	2.17283	10.9035	0	0	0
AT1G03930	407.484	0.410162	0.260255	1.576	0.115025	0.407933	401.66	326.649	321.652	460.898	388.691	545.351
AT1G03935	7.99342	1.45283	1.62196	0.895726	0.370399	0.706302	0	2.89711	9.99484	7.84507	5.61286	21.6106
AT1G03940	15.8307	1.15177	1.02221	1.12674	0.259851	0.601195	11.2017	6.51849	11.8121	18.6321	11.2257	35.594
AT1G03950	273.621	0.12391	0.31502	0.393339	0.694069	0.897909	252.838	330.27	201.714	229.468	318.53	308.905
AT1G03960	315.246	-0.37973	0.323032	-1.17552	0.239786	0.577946	483.272	320.13	265.318	210.836	315.724	296.193
AT1G03970	26.7888	1.16425	0.810645	1.4362	0.150946	0.46666	18.4028	9.41559	21.8069	32.3609	53.3222	25.4243
AT1G03980	19.8127	1.62222	1.45402	1.11568	0.264559	0.605476	0.80012	28.2468	0	32.3609	2.80643	54.6622
AT1G03982	24.0065	-0.418212	0.999326	-0.418494	0.675586	0.889793	7.20108	58.6664	16.3552	10.787	15.4354	35.594
AT1G03990	74.8508	0.00514673	0.511341	0.0100652	0.991969	0.998536	72.8109	85.4646	65.4208	46.0898	95.4187	83.9002
AT1G04000	635.421	0.0389267	0.328429	0.118524	0.905653	0.975858	308.046	727.174	845.927	767.837	585.141	578.403
AT1G04010	40.4972	-0.703046	0.69735	-1.00817	0.313374	0.65287	43.2065	77.4976	29.9845	43.1479	22.4515	26.6955
AT1G04020	20.2592	-1.5086	1.12142	-1.34526	0.17854	0.506012	18.4028	42.7323	29.0759	18.6321	0	12.7121
AT1G04030	21.5486	2.93877	0.973603	3.01845	0.0025407	0.0419826	5.60084	2.17283	7.26898	40.206	16.8386	57.2047
AT1G04040	159.859	0.577975	0.569775	1.01439	0.310395	0.650455	128.019	110.814	146.288	227.507	35.0804	311.448
AT1G04050	138.486	-0.770974	0.578113	-1.3336	0.182333	0.509532	297.645	63.7363	162.643	86.2958	47.7093	172.885
AT1G04070	163.266	0.0911348	0.409361	0.222627	0.823826	0.949774	101.615	232.493	139.928	148.076	151.547	205.937
AT1G04080	2600.13	0.260507	0.166921	1.56066	0.118604	0.4142	2468.37	2142.41	2486.9	2661.44	3112.33	2729.3
AT1G04090	6.76248	1.16955	1.75917	0.664831	0.506159	0.804872	0	4.34566	8.1776	12.7482	14.0322	1.27121
AT1G04100	184.607	0.386204	0.353445	1.09268	0.274533	0.615374	188.028	128.197	164.461	264.771	188.031	174.156
AT1G04110	2.64148	-1.80353	2.71208	-0.664997	0.506052	0.804802	0	8.69132	3.63449	0.980634	0	2.54243
AT1G04120	126.639	-0.492661	0.379211	-1.29917	0.193884	0.524856	151.223	162.238	130.842	114.734	94.0155	106.782
AT1G04130	182.12	-1.32278	0.37249	-3.55117	0.000383526	0.0108856	188.828	336.064	256.231	128.463	95.4187	87.7138
AT1G04140	889.113	0.261561	0.196609	1.33036	0.1834	0.510913	892.134	714.861	819.577	992.402	945.768	969.937
AT1G04150	0	NA	NA	NA	NA	NA	0	0	0	0	0	0
AT1G04160	40.0947	-0.845675	0.644462	-1.31222	0.189446	0.518437	64.8097	47.8023	41.7966	24.5159	33.6772	27.9667
AT1G04170	370.7	-0.345482	0.249528	-1.38454	0.166192	0.488678	396.859	460.64	387.073	339.299	333.965	306.363
AT1G04171	0.233869	1.53911	4.08047	0.377189	0.706033	NA	0	0	0	0	1.40322	0
AT1G04180	0.163439	1.53911	4.08047	0.377189	0.706033	NA	0	0	0	0.980634	0	0
AT1G04190	359.437	0.359748	0.253673	1.41816	0.156145	0.474156	289.643	336.789	318.018	383.428	377.465	451.281
AT1G04200	354.916	0.67516	0.282895	2.38661	0.0170045	0.141238	222.433	346.204	250.78	377.544	467.271	465.265
AT1G04210	628.468	0.738941	0.255886	2.88777	0.00387983	0.0552325	468.07	386.039	558.802	746.263	983.654	627.98
AT1G04220	70.7019	-1.41783	0.538838	-2.63127	0.00850658	0.0931524	126.419	97.7773	84.5018	34.3222	25.2579	55.9334
AT1G04230	191.462	0.344124	0.351179	0.97991	0.32713	0.666231	182.427	120.23	203.531	180.437	237.143	225.005
AT1G04240	1028.45	0.505205	0.271731	1.85921	0.0629975	0.29687	791.319	689.511	1069.45	797.256	1227.81	1595.37
AT1G04250	1499.37	0.475868	0.233306	2.03967	0.0413827	0.238469	1517.03	1010.37	1234.82	1288.55	1860.66	2084.79
AT1G04260	250.101	-0.000159037	0.406719	-0.000391024	0.999688	0.999872	111.217	262.188	377.078	246.139	276.434	227.547
AT1G04270	668.254	-0.12634	0.217486	-0.580911	0.561301	0.8354	765.715	690.236	636.035	622.703	724.059	570.775
AT1G04280	1580.32	-0.546735	0.22721	-2.4063	0.0161151	0.137501	2109.12	1867.91	1650.06	910.029	1372.35	1572.49
AT1G04290	42.8099	-0.584725	0.614146	-0.952094	0.341049	0.680065	60.009	51.4236	42.7052	37.2641	33.6772	31.7804
AT1G04295	0	NA	NA	NA	NA	NA	0	0	0	0	0	0
AT1G04300	904.062	0.341557	0.20606	1.65756	0.0974061	0.374088	713.707	806.12	872.277	866.881	1059.43	1105.96
AT1G04310	18.8196	-0.440303	0.994854	-0.44258	0.65807	0.883978	31.2047	23.9011	9.99484	20.5933	5.61286	21.6106
AT1G04320	0	NA	NA	NA	NA	NA	0	0	0	0	0	0
AT1G04330	0.80012	-2.85293	3.95146	-0.721993	0.470299	NA	4.80072	0	0	0	0	0
AT1G04340	361.572	0.191973	0.266898	0.719276	0.471971	0.784178	303.245	401.249	308.023	412.847	409.739	334.329
AT1G04350	2026.91	-0.00741616	0.259049	-0.0286284	0.977161	0.995272	2017.9	1975.1	2103.46	2312.34	2608.58	1144.09
AT1G04360	118.627	-1.73666	0.545195	-3.1854	0.00144553	0.0285167	145.622	263.637	137.202	21.574	95.4187	48.3062
AT1G04370	0	NA	NA	NA	NA	NA	0	0	0	0	0	0
AT1G04380	1.33353	-3.58953	3.93365	-0.912519	0.361496	NA	8.0012	0	0	0	0	0
AT1G04390	163.514	-0.0929258	0.425568	-0.218357	0.827151	0.951474	261.639	97.7773	147.197	184.359	151.547	138.562
AT1G04400	1528.07	0.394073	0.197175	1.9986	0.0456521	0.251068	1269.79	1226.92	1464.7	1416.04	1812.96	1978.01
AT1G04410	4963.19	0.0374159	0.180145	0.207699	0.835464	0.954329	4297.44	5603	4795.71	4723.72	4460.82	5898.44
AT1G04420	787.232	0.243803	0.261308	0.933013	0.350813	0.688806	515.277	905.346	742.344	1021.82	855.962	682.642
AT1G04425	0.490317	2.75336	4.01307	0.686099	0.492651	NA	0	0	0	2.9419	0	0
AT1G04430	1764.48	1.18929	0.222325	5.34936	8.83e-08	1.45e-05	1020.15	1059.62	1147.59	2115.23	1951.87	3292.45
AT1G04440	2292.67	0.471661	0.18426	2.55976	0.0104743	0.105641	2074.71	1748.4	1939.91	2471.2	3158.64	2363.19
AT1G04445	9.93793	0.79364	1.24804	0.635911	0.524835	0.815468	9.60144	5.79421	6.36035	4.90317	12.6289	20.3394
AT1G04450	8.30158	-4.24696	1.9714	-2.15428	0.0312178	0.202565	32.0048	0.724277	14.538	0	0	2.54243
AT1G04457	0	NA	NA	NA	NA	NA	0	0	0	0	0	0
AT1G04470	3.95282	5.7406	2.81926	2.03621	0.0417296	0.239695	0	0	0	18.6321	0	5.08486
AT1G04480	660.415	-0.292157	0.252374	-1.15764	0.247012	0.584922	818.523	788.737	574.249	708.999	611.802	460.18
AT1G04490	9.23502	0.0178349	1.26992	0.0140441	0.988795	0.998239	6.40096	10.1399	10.9035	4.90317	15.4354	7.62729
AT1G04500	0.40006	-1.85372	3.99557	-0.463944	0.642688	NA	2.40036	0	0	0	0	0
AT1G04501	0	NA	NA	NA	NA	NA	0	0	0	0	0	0
AT1G04510	253.208	0.489919	0.302665	1.61868	0.105515	0.390778	220.833	245.53	165.369	310.861	265.208	311.448
AT1G04520	18.5339	-1.06087	1.27299	-0.833372	0.404635	0.734113	52.8079	1.44855	20.8983	13.7289	21.0482	1.27121
AT1G04530	1319.29	0.130035	0.237233	0.54813	0.583603	0.847588	1098.56	1387.71	1293.88	1680.81	1514.07	940.699
AT1G04540	12.2623	-0.830552	1.62795	-0.510184	0.609923	0.86257	0.80012	0	46.3397	7.84507	8.4193	10.1697
AT1G04550	299.502	-0.334642	0.273575	-1.22322	0.221248	0.556181	316.848	365.035	319.835	244.178	304.498	246.616
AT1G04555	171.376	-0.683127	0.343628	-1.98799	0.0468132	0.254465	185.628	203.522	244.419	118.657	123.483	152.546
AT1G04560	0.362138	-1.72372	4.00384	-0.430517	0.66682	NA	0	2.17283	0	0	0	0
AT1G04570	6.14034	0.470708	2.30466	0.204242	0.838164	0.955037	0	0	15.4466	0	11.2257	10.1697
AT1G04580	0.151437	-0.384446	4.08047	-0.0942159	0.924938	NA	0	0	0.908622	0	0	0
AT1G04590	182.98	-0.494918	0.435533	-1.13635	0.255811	0.596533	278.442	265.085	98.1312	135.328	195.047	125.85
AT1G04600	3.90875	-1.25009	2.62042	-0.47706	0.63332	0.873146	12.8019	0	3.63449	0	7.01608	0
AT1G04610	1.86695	-4.07479	3.92599	-1.0379	0.299316	NA	11.2017	0	0	0	0	0
AT1G04620	25.5972	0.405018	0.948345	0.427079	0.669322	0.888367	38.4058	23.9011	3.63449	26.4771	42.0965	19.0682
AT1G04625	0.557092	1.54218	4.03277	0.382412	0.702156	NA	0.80012	0	0	0	0	2.54243
AT1G04630	299.551	-0.733352	0.303787	-2.41404	0.0157769	0.13584	262.439	438.912	420.692	210.836	234.337	230.09
AT1G04635	3.28091	5.46942	2.98123	1.83462	0.0665625	0.305579	0	0	0	10.787	0	8.8985
AT1G04640	405.539	-0.297459	0.294171	-1.01118	0.31193	0.651537	322.448	577.973	441.59	436.382	339.578	315.261
AT1G04645	4.9147	0.97179	2.43039	0.39985	0.689267	0.895285	0	0	9.99484	6.86444	12.6289	0
AT1G04650	57.3992	-0.341711	0.611672	-0.55865	0.5764	0.842982	81.6122	42.7323	68.1466	54.9155	71.564	25.4243
AT1G04660	0.266707	-1.26943	4.03914	-0.314283	0.753306	NA	1.60024	0	0	0	0	0
AT1G04670	0	NA	NA	NA	NA	NA	0	0	0	0	0	0
AT1G04680	178.076	-1.3174	0.418023	-3.1515	0.00162434	0.0305292	171.226	373.727	218.069	127.482	67.3544	110.596
AT1G04684	0	NA	NA	NA	NA	NA	0	0	0	0	0	0
AT1G04690	949.723	0.151729	0.212986	0.712392	0.476222	0.786695	704.906	1012.54	982.22	1031.63	978.042	989.005
AT1G04700	4.51736	0.676682	2.21391	0.305651	0.759871	0.923286	3.20048	0	7.26898	3.92254	0	12.7121
AT1G04710	228.601	-0.0507745	0.373846	-0.135817	0.891966	0.970955	204.831	168.756	324.378	222.604	294.675	156.359
AT1G04720	0	NA	NA	NA	NA	NA	0	0	0	0	0	0
AT1G04730	12.9276	0.690822	1.11366	0.620314	0.535051	0.821144	10.4016	5.79421	13.6293	26.4771	9.82251	11.4409
AT1G04750	687.95	-0.133933	0.266671	-0.502242	0.615498	0.865398	695.304	915.486	548.808	684.483	496.738	786.882
AT1G04760	60.8576	-1.42138	0.586305	-2.4243	0.0153378	0.133368	129.619	61.5635	74.507	30.3997	44.9029	24.1531
AT1G04770	2951.56	-0.62349	0.29025	-2.14811	0.0317047	0.204527	4384.66	3622.83	2730.41	2231.92	3464.54	1275.03
AT1G04778	0	NA	NA	NA	NA	NA	0	0	0	0	0	0
AT1G04780	576.898	-0.297171	0.264356	-1.12414	0.260956	0.601996	736.11	594.631	576.975	404.021	464.464	685.185
AT1G04790	345.519	-0.222255	0.287747	-0.7724	0.439878	0.76096	443.266	293.332	379.804	339.299	360.627	256.785
AT1G04800	5.05494	1.47657	1.89848	0.777767	0.436706	0.758717	0	4.34566	3.63449	1.96127	14.0322	6.35607
AT1G04810	456.546	-0.136596	0.238572	-0.572559	0.566943	0.838084	407.261	500.475	527.001	454.034	419.562	430.942
AT1G04820	668.399	-0.409656	0.309286	-1.32452	0.185331	0.512903	573.686	1059.62	655.116	648.199	360.627	713.151
AT1G04830	618.53	-0.243935	0.230355	-1.05895	0.289622	0.630116	773.716	577.248	660.568	508.949	644.076	546.622
AT1G04840	21.6159	0.447676	1.01416	0.441425	0.658905	0.884633	24.0036	2.89711	28.1673	35.3028	12.6289	26.6955
AT1G04850	903.963	-0.235606	0.217971	-1.08091	0.279739	0.620407	985.748	953.148	993.124	664.87	812.462	1014.43
AT1G04860	384.507	0.0568287	0.257166	0.22098	0.825108	0.950371	430.465	344.756	355.271	347.145	384.481	444.925
AT1G04870	221.993	0.244571	0.299341	0.81703	0.413912	0.741617	208.031	222.353	178.999	232.41	251.176	238.988
AT1G04880	7.06591	0.140834	1.93191	0.0728988	0.941887	0.98732	4.80072	0	15.4466	13.7289	8.4193	0
AT1G04890	0	NA	NA	NA	NA	NA	0	0	0	0	0	0
AT1G04900	51.3836	0.77904	0.582243	1.338	0.180897	0.507777	36.8055	48.5265	28.1673	75.5088	51.919	67.3744
AT1G04910	314.187	0.181626	0.303567	0.598307	0.549635	0.828879	215.232	379.521	288.033	291.248	356.417	354.669
AT1G04920	4.51175	-3.57349	2.30814	-1.54821	0.121571	0.41915	0.80012	11.5884	12.7207	1.96127	0	0
AT1G04930	30.203	0.966619	0.771816	1.2524	0.210425	0.544393	28.8043	18.1069	14.538	60.7993	32.274	26.6955
AT1G04940	110.242	-0.818584	0.447015	-1.83122	0.0670676	0.306984	134.42	188.312	99.0398	76.4895	99.6283	63.5607
AT1G04945	34.9354	0.423459	0.956484	0.442724	0.657965	0.883978	12.0018	7.96704	69.9639	79.4314	22.4515	17.797
AT1G04950	542.74	0.370003	0.233529	1.5844	0.113102	0.404164	419.263	449.051	552.442	574.652	580.931	680.1
AT1G04960	1397.06	0.024894	0.196006	0.127006	0.898935	0.972939	1558.63	1300.8	1295.69	1365.04	1223.6	1638.6
AT1G04970	1141.9	0.257388	0.200926	1.28101	0.200189	0.531661	927.339	940.111	1253.9	1201.28	1233.43	1295.37
AT1G04980	242.833	1.11243	0.376772	2.95254	0.00315169	0.0483282	230.435	119.506	110.852	389.312	370.449	236.446
AT1G04985	1045.95	-0.153298	0.200784	-0.763496	0.445168	0.764096	1070.56	1285.59	947.693	992.402	1042.59	936.885
AT1G04990	215.351	-0.397124	0.402378	-0.986941	0.323671	0.662274	312.847	186.139	235.333	139.25	124.886	293.651
AT1G05000	261.424	0.458923	0.28633	1.60277	0.108984	0.395759	212.832	220.18	227.155	255.946	340.981	311.448
AT1G05010	1550.18	0.704779	0.259124	2.71985	0.0065312	0.0784082	1611.44	920.555	1004.94	1901.45	1427.07	2435.65
AT1G05020	79.9956	-0.264147	0.530015	-0.498377	0.618219	0.866144	62.4094	107.917	91.7708	79.4314	39.29	99.1547
AT1G05030	148.439	-0.163406	0.380474	-0.429481	0.667573	0.88798	195.229	137.613	137.202	109.831	168.386	142.376
AT1G05040	1.92653	0.624828	3.74965	0.166637	0.867656	NA	0	0	4.54311	0	7.01608	0
AT1G05055	211.09	0.0126097	0.540442	0.0233322	0.981385	0.996172	55.2083	200.625	375.261	316.745	185.225	133.478
AT1G05060	226.038	0.200903	0.324387	0.619332	0.535697	0.821608	252.838	160.789	217.161	203.972	259.595	261.87
AT1G05061	3.14217	5.3976	3.04959	1.76994	0.0767363	0.330161	0	0	0	0	11.2257	7.62729
AT1G05065	7.08491	0.693299	1.51291	0.458255	0.646769	0.879317	0.80012	10.8641	4.54311	7.84507	7.01608	11.4409
AT1G05070	344.21	0.38011	0.289957	1.31092	0.189884	0.519365	212.832	312.163	372.535	380.486	395.707	391.534
AT1G05080	0	NA	NA	NA	NA	NA	0	0	0	0	0	0
AT1G05085	4.22305	-2.36523	2.58244	-0.915887	0.359726	0.696774	18.4028	0	2.72587	0	4.20965	0
AT1G05090	45.0967	0.297812	0.62568	0.475982	0.634087	0.873575	35.2053	32.5924	53.6087	49.0317	64.5479	35.594
AT1G05100	362.191	-0.912213	0.36209	-2.5193	0.011759	0.113439	428.864	514.961	474.301	127.482	238.547	388.992
AT1G05120	186.89	-0.508055	0.322261	-1.57653	0.114903	0.407933	215.232	228.871	214.435	157.882	133.306	171.614
AT1G05135	939.576	-0.749961	0.253126	-2.96279	0.00304864	0.0472265	1123.37	1263.86	1147.59	561.903	554.27	986.463
AT1G05136	0	NA	NA	NA	NA	NA	0	0	0	0	0	0
AT1G05140	580.578	0.102389	0.262084	0.390671	0.69604	0.89896	488.073	648.952	543.356	738.418	628.641	436.027
AT1G05150	181.319	-0.160757	0.340244	-0.472476	0.636587	0.874845	157.624	204.246	212.618	178.475	141.725	193.225
AT1G05160	280.173	0.568872	0.316453	1.79765	0.0722327	0.319519	160.824	258.567	257.14	273.597	391.497	339.414
AT1G05170	500.87	-0.673474	0.292559	-2.30201	0.0213348	0.161402	688.903	581.594	576.066	380.486	529.012	249.158
AT1G05180	450.763	-0.262938	0.253837	-1.03585	0.300272	0.639935	472.071	596.804	406.154	418.731	376.062	434.755
AT1G05190	1691.89	-0.34899	0.181469	-1.92314	0.0544623	0.27686	1746.66	2193.11	1746.37	1503.31	1553.36	1408.51
AT1G05200	1022.36	-0.19401	0.185896	-1.04365	0.296648	0.636529	1096.96	1019.06	1157.58	1010.05	941.558	908.918
AT1G05205	115.716	-0.495116	0.469817	-1.05385	0.291952	0.631575	140.021	181.069	85.4105	129.444	61.7415	96.6123
AT1G05210	32.746	-0.595728	0.800694	-0.744015	0.456867	0.772407	34.4052	66.6334	17.2638	32.3609	14.0322	31.7804
AT1G05220	6.31643	-0.870812	1.81367	-0.480138	0.631129	0.872173	18.4028	1.44855	4.54311	0	8.4193	5.08486
AT1G05230	184.409	-0.340275	0.341417	-0.996656	0.318932	0.657989	216.032	241.184	160.826	160.824	144.531	183.055
AT1G05240	3.31367	1.07024	2.45994	0.435069	0.663512	0.886808	6.40096	0	0	3.92254	7.01608	2.54243
AT1G05250	0.163439	1.53911	4.08047	0.377189	0.706033	NA	0	0	0	0.980634	0	0
AT1G05260	4.85643	-1.71843	2.00314	-0.85787	0.390965	0.722802	0.80012	4.34566	17.2638	3.92254	2.80643	0
AT1G05270	563.965	0.181928	0.291287	0.624566	0.532256	0.819809	316.848	678.647	589.696	566.807	580.931	650.862
AT1G05280	0.40006	-1.85372	3.99557	-0.463944	0.642688	NA	2.40036	0	0	0	0	0
AT1G05290	6.46517	-5.86851	2.21871	-2.64501	0.00816895	0.0906571	17.6026	20.2797	0.908622	0	0	0
AT1G05291	0	NA	NA	NA	NA	NA	0	0	0	0	0	0
AT1G05300	27.3309	-0.313386	0.829819	-0.377656	0.705686	0.903636	48.0072	27.5225	15.4466	35.3028	22.4515	15.2546
AT1G05310	850.848	-0.130357	0.298086	-0.437315	0.661883	0.88624	975.346	780.046	911.348	443.247	857.365	1137.74
AT1G05320	339.921	-1.45741	0.328496	-4.43662	9.14e-06	0.000718396	590.489	584.491	319.835	161.805	151.547	231.361
AT1G05330	149.284	0.0669825	0.498196	0.13445	0.893047	0.971139	196.029	138.337	102.674	72.5669	117.87	268.226
AT1G05340	3508.33	-0.674008	0.184881	-3.64563	0.00026674	0.00855152	4723.11	4145.03	4069.72	2143.67	3028.14	2940.32
AT1G05350	482.22	-0.234704	0.23708	-0.98998	0.322184	0.660781	436.865	573.627	553.351	426.576	463.061	439.84
AT1G05360	383.573	-0.169988	0.341809	-0.497318	0.618965	0.866452	551.283	341.134	326.195	438.343	432.191	212.293
AT1G05370	27.2121	-1.19116	0.791127	-1.50565	0.132157	0.434183	32.0048	26.074	55.4259	13.7289	18.2418	17.797
AT1G05380	248.366	-0.0767018	0.390282	-0.196529	0.844196	0.95631	268.84	141.958	354.363	204.953	190.837	329.245
AT1G05385	413.797	-0.0253953	0.27408	-0.0926564	0.926177	0.982738	301.645	440.36	510.646	429.518	402.723	397.89
AT1G05390	0	NA	NA	NA	NA	NA	0	0	0	0	0	0
AT1G05400	4.57784	-0.0868627	2.19519	-0.0395696	0.968436	0.993698	9.60144	0	4.54311	4.90317	8.4193	0
AT1G05410	182.76	0.243311	0.3618	0.672501	0.501265	0.801316	130.42	232.493	139.019	204.953	196.45	193.225
AT1G05420	3.74678	0.816234	2.64387	0.308727	0.757529	0.922832	0	0	8.1776	5.88381	8.4193	0
AT1G05430	321.859	-0.12856	0.284282	-0.452229	0.651104	0.881343	388.058	337.513	283.49	370.68	280.643	270.769
AT1G05440	0	NA	NA	NA	NA	NA	0	0	0	0	0	0
AT1G05450	0	NA	NA	NA	NA	NA	0	0	0	0	0	0
AT1G05460	85.3309	-0.708958	0.498306	-1.42274	0.154812	0.472647	116.017	132.543	69.0553	62.7606	47.7093	83.9002
AT1G05470	33.2201	-0.505393	0.81862	-0.617372	0.536989	0.822079	50.4076	18.1069	48.157	10.787	47.7093	24.1531
AT1G05490	2.92244	1.9446	2.93294	0.663023	0.507316	0.805656	0	0	3.63449	0	12.6289	1.27121
AT1G05500	441.107	-0.211707	0.2613	-0.810204	0.417823	0.744449	401.66	566.384	452.494	439.324	336.772	450.01
AT1G05510	10.4001	0.0958544	1.69173	0.0566605	0.954816	0.990129	12.8019	17.3826	0	15.6901	0	16.5258
AT1G05520	195.701	0.111551	0.341618	0.326537	0.744018	0.918209	154.423	245.53	164.461	223.585	186.628	199.581
AT1G05530	0	NA	NA	NA	NA	NA	0	0	0	0	0	0
AT1G05540	39.7083	-0.403815	0.682825	-0.591389	0.55426	0.831271	52.0078	24.6254	59.0604	32.3609	43.4997	26.6955
AT1G05550	3.39643	-3.87397	2.81494	-1.37621	0.168755	0.492297	16.8025	2.17283	0	0	1.40322	0
AT1G05560	44.5258	-0.533242	0.765114	-0.696945	0.485837	0.79264	29.6044	105.744	22.7155	53.9349	32.274	22.8819
AT1G05562	0.739101	-2.73032	3.9554	-0.690277	0.49002	NA	0.80012	0	3.63449	0	0	0
AT1G05570	118.862	0.863737	0.415579	2.07839	0.0376734	0.226008	61.6092	78.9461	112.669	167.688	147.338	144.918
AT1G05575	1859.9	-1.29847	0.231776	-5.60226	2.12e-08	4.21e-06	3060.46	2929.7	1944.45	1293.46	1098.72	832.646
AT1G05577	17.3176	-0.516084	0.96563	-0.534453	0.593028	0.853382	12.8019	31.8682	16.3552	10.787	16.8386	15.2546
AT1G05580	1.60024	-3.85247	3.92919	-0.980476	0.326851	NA	9.60144	0	0	0	0	0
AT1G05590	111.759	0.415796	0.494891	0.840177	0.400809	0.730316	124.819	43.4566	119.029	104.928	161.37	116.952
AT1G05600	79.7258	-0.0275219	0.672239	-0.0409406	0.967343	0.993644	86.413	136.888	18.1724	101.986	42.0965	92.7987
AT1G05610	1.70262	-3.94485	3.89931	-1.01168	0.311691	NA	0.80012	9.41559	0	0	0	0
AT1G05615	0	NA	NA	NA	NA	NA	0	0	0	0	0	0
AT1G05620	230.599	-0.272425	0.313816	-0.868104	0.385337	0.718276	267.24	198.452	291.668	218.681	183.821	223.734
AT1G05630	175.674	0.157916	0.398202	0.396572	0.691683	0.896694	216.833	149.201	132.659	238.294	113.66	203.394
AT1G05640	10.7386	2.68859	1.55695	1.72683	0.0841983	0.345858	0	1.44855	7.26898	1.96127	30.8708	22.8819
AT1G05650	0	NA	NA	NA	NA	NA	0	0	0	0	0	0
AT1G05660	0.80012	-2.85293	3.95146	-0.721993	0.470299	NA	4.80072	0	0	0	0	0
AT1G05670	383.163	0.286309	0.244263	1.17214	0.241143	0.579254	362.454	309.99	363.449	409.905	420.965	432.213
AT1G05675	2394.73	-0.677562	0.239097	-2.83384	0.00459927	0.0625983	3808.57	2169.21	2863.07	1928.91	2214.27	1384.35
AT1G05680	80.1107	-1.06401	0.564342	-1.88539	0.0593766	0.289116	90.4136	154.271	79.9587	41.1866	85.5962	29.2379
AT1G05690	158.798	0.622145	0.374246	1.6624	0.0964335	0.372458	127.219	112.987	135.385	240.255	203.466	133.478
AT1G05700	7.04821	0.311314	1.68822	0.184404	0.853697	0.959742	15.2023	3.62138	0	5.88381	11.2257	6.35607
AT1G05710	198.559	0.0776902	0.361793	0.214737	0.829973	0.952434	187.228	181.793	210.8	237.313	248.369	125.85
AT1G05720	242.628	-0.259154	0.318572	-0.813488	0.415938	0.742464	195.229	329.546	268.043	205.933	223.111	233.903
AT1G05730	3.73796	-0.606946	2.98401	-0.203399	0.838823	0.955037	13.602	0	0	8.82571	0	0
AT1G05740	0	NA	NA	NA	NA	NA	0	0	0	0	0	0
AT1G05750	21.0394	-0.415558	0.992	-0.41891	0.675282	0.889741	12.8019	44.9051	14.538	25.4965	5.61286	22.8819
AT1G05760	0	NA	NA	NA	NA	NA	0	0	0	0	0	0
AT1G05770	1.90682	4.68025	3.93504	1.18938	0.234291	NA	0	0	0	0	0	11.4409
AT1G05780	156.898	-0.47185	0.350618	-1.34577	0.178378	0.505845	178.427	177.448	190.811	108.85	133.306	152.546
AT1G05785	345.811	0.140305	0.277656	0.50532	0.613334	0.864254	313.647	363.587	308.931	277.519	406.933	404.246
AT1G05790	400.329	0.169403	0.303127	0.558851	0.576263	0.842982	532.08	334.616	263.5	392.254	430.787	448.739
AT1G05800	0	NA	NA	NA	NA	NA	0	0	0	0	0	0
AT1G05805	786.535	0.261364	0.200382	1.30432	0.192123	0.521771	703.305	730.071	712.36	770.779	947.171	855.527
AT1G05810	78.8177	0.723056	0.57287	1.26216	0.20689	0.540278	62.4094	84.7404	30.8931	60.7993	82.7897	151.275
AT1G05820	28.1009	0.419513	0.764486	0.548751	0.583176	0.847394	18.4028	21.004	32.7104	23.5352	32.274	40.6789
AT1G05830	1074.86	0.427977	0.218791	1.9561	0.0504536	0.265346	1121.77	824.951	802.313	1040.45	1286.75	1372.91
AT1G05835	16.9368	0.83209	1.28414	0.647974	0.517002	0.811436	18.4028	0	18.1724	9.80634	19.645	35.594
AT1G05840	569.945	0.726663	0.28169	2.57965	0.00988996	0.101943	470.471	272.328	546.082	732.534	634.254	764
AT1G05850	1890.3	0.330776	0.197101	1.6782	0.0933074	0.365472	1661.85	1723.78	1638.25	2069.14	1679.65	2569.12
AT1G05860	310.516	0.0366062	0.309233	0.118377	0.905769	0.975896	212.832	375.9	330.738	278.5	300.288	364.839
AT1G05870	524.978	-0.545471	0.259499	-2.10202	0.0355517	0.218378	764.115	545.38	560.62	505.027	343.788	430.942
AT1G05880	0.133353	-0.384446	4.08047	-0.0942159	0.924938	NA	0.80012	0	0	0	0	0
AT1G05890	860.779	0.335124	0.220389	1.5206	0.12836	0.42872	935.34	639.536	708.725	895.319	947.171	1038.58
AT1G05894	23.3973	1.27813	0.877184	1.45708	0.145094	0.457495	17.6026	15.9341	7.26898	16.6708	43.4997	39.4077
AT1G05900	845.355	-0.246468	0.272812	-0.903434	0.366296	0.702484	1176.18	769.182	805.948	676.638	1059.43	584.759
AT1G05910	310.646	-0.114473	0.306955	-0.372932	0.709199	0.904556	328.849	325.2	315.292	317.725	199.257	377.551
AT1G05920	9.52006	-1.37664	1.52266	-0.904104	0.365941	0.70225	11.2017	2.89711	27.2587	6.86444	0	8.8985
AT1G05925	0.362138	-1.72372	4.00384	-0.430517	0.66682	NA	0	2.17283	0	0	0	0
AT1G05930	5.95719	4.28805	2.01424	2.12887	0.0332652	0.210596	0	0	1.81724	4.90317	11.2257	17.797
AT1G05940	601.929	-0.0924279	0.241909	-0.382077	0.702404	0.90177	771.316	569.281	523.366	651.141	561.286	535.181
AT1G05950	54.4209	-1.24734	0.645115	-1.93352	0.0531726	0.273442	61.6092	104.296	63.6035	18.6321	22.4515	55.9334
AT1G05960	405.397	0.396784	0.288865	1.3736	0.169566	0.493452	342.451	453.397	253.506	415.789	430.787	536.453
AT1G05970	308.989	-0.0153912	0.370835	-0.0415042	0.966894	0.993644	164.025	394.731	373.444	326.551	218.902	376.28
AT1G05980	0	NA	NA	NA	NA	NA	0	0	0	0	0	0
AT1G05990	0	NA	NA	NA	NA	NA	0	0	0	0	0	0
AT1G06000	112.501	0.917981	0.433073	2.11969	0.0340321	0.213561	78.4118	56.4936	99.0398	170.63	158.563	111.867
AT1G06002	0.454311	-2.02114	3.98595	-0.507066	0.612109	NA	0	0	2.72587	0	0	0
AT1G06010	63.5644	-1.07197	0.572175	-1.8735	0.0609994	0.292157	89.6134	115.884	52.7001	39.2254	54.7254	29.2379
AT1G06020	26.4964	0.754238	0.87922	0.857849	0.390976	0.722802	38.4058	10.8641	9.99484	49.0317	25.2579	25.4243
AT1G06030	44.5648	0.776562	0.638851	1.21556	0.224153	0.559723	34.4052	18.8312	45.4311	49.0317	56.1286	63.5607
AT1G06040	3730.25	-0.0719885	0.19425	-0.370598	0.710937	0.905333	3849.38	3532.3	4088.8	4071.59	4111.42	2728.03
AT1G06050	348.476	0.275488	0.295312	0.932872	0.350886	0.688806	260.839	261.464	424.326	425.595	369.046	349.584
AT1G06060	427.605	0.471613	0.253667	1.85918	0.0630015	0.29687	299.245	417.908	357.997	532.484	440.61	517.384
AT1G06070	348.061	0.00176242	0.297288	0.00592833	0.99527	0.999234	245.637	417.183	380.713	333.416	305.901	405.517
AT1G06080	6.76102	-5.93267	2.17333	-2.72976	0.00633803	0.0769314	1.60024	28.9711	9.99484	0	0	0
AT1G06090	0	NA	NA	NA	NA	NA	0	0	0	0	0	0
AT1G06100	7.00471	0.67858	1.66027	0.408717	0.682747	0.892504	8.0012	0	8.1776	6.86444	12.6289	6.35607
AT1G06110	852.014	-0.0962477	0.205058	-0.469368	0.638807	0.875396	822.523	929.971	889.541	904.145	700.205	865.697
AT1G06120	0.133353	-0.384446	4.08047	-0.0942159	0.924938	NA	0.80012	0	0	0	0	0
AT1G06130	1804.66	0.378465	0.170015	2.22607	0.0260097	0.182099	1577.04	1502.15	1628.25	1912.24	2249.36	1958.94
AT1G06135	25.8775	-2.20654	0.993727	-2.22047	0.0263869	0.183966	30.4046	83.2918	13.6293	5.88381	18.2418	3.81364
AT1G06137	0	NA	NA	NA	NA	NA	0	0	0	0	0	0
AT1G06140	26.8204	0.662292	0.93063	0.71166	0.476675	0.786916	44.8067	9.41559	8.1776	46.0898	16.8386	35.594
AT1G06148	14.2345	-3.02195	1.30708	-2.312	0.0207779	0.159153	48.0072	18.1069	9.99484	2.9419	0	6.35607
AT1G06149	0	NA	NA	NA	NA	NA	0	0	0	0	0	0
AT1G06150	46.9835	-0.0387888	0.778002	-0.0498569	0.960236	0.991225	81.6122	52.8722	8.1776	42.1673	58.9351	38.1364
AT1G06160	1476.6	2.20876	0.32346	6.82853	8.58e-12	5.32e-09	335.25	717.758	522.458	2344.7	1345.68	3593.72
AT1G06170	2.63423	-3.47562	3.40923	-1.01947	0.307978	0.648101	14.4022	0	0	0	1.40322	0
AT1G06180	63.7921	-0.232323	0.511661	-0.454057	0.649788	0.880864	67.2101	73.1519	66.3294	52.9542	51.919	71.188
AT1G06190	604.871	0.375098	0.239408	1.56677	0.117167	0.411649	425.664	556.969	597.873	764.895	701.608	582.216
AT1G06200	987.858	0.000851705	0.216281	0.00393796	0.996858	0.999304	1039.36	1132.04	790.501	971.809	1109.94	883.494
AT1G06210	517.497	-0.338878	0.279654	-1.21177	0.225599	0.561838	732.11	425.15	576.975	498.162	519.19	353.398
AT1G06220	414.128	-0.0431066	0.268614	-0.160478	0.872505	0.965091	420.863	323.752	517.006	429.518	369.046	424.586
AT1G06225	0	NA	NA	NA	NA	NA	0	0	0	0	0	0
AT1G06230	554.018	-0.0553757	0.228433	-0.242416	0.808458	0.944655	621.693	470.055	602.416	534.446	537.432	558.063
AT1G06240	240.552	-0.0590476	0.380849	-0.155042	0.876788	0.966467	140.021	299.85	296.211	209.856	314.32	183.055
AT1G06250	134.92	0.0913538	0.50058	0.182496	0.855194	0.959814	146.422	197.003	48.157	122.579	126.289	169.072
AT1G06260	0	NA	NA	NA	NA	NA	0	0	0	0	0	0
AT1G06265	161.895	0.0885723	0.397794	0.222658	0.823801	0.949774	208.831	103.572	158.1	128.463	202.063	170.343
AT1G06270	38.1769	-0.646735	0.670978	-0.96387	0.335111	0.674467	61.6092	36.2138	41.7966	21.574	32.274	35.594
AT1G06280	7.34138	-6.05054	2.36638	-2.55687	0.0105618	0.106167	36.8055	7.24277	0	0	0	0
AT1G06290	270.7	0.187312	0.291414	0.642768	0.520375	0.813774	259.239	286.089	213.526	247.12	301.691	316.532
AT1G06310	0	NA	NA	NA	NA	NA	0	0	0	0	0	0
AT1G06320	1.20018	-3.43759	3.93663	-0.873233	0.382536	NA	7.20108	0	0	0	0	0
AT1G06330	0	NA	NA	NA	NA	NA	0	0	0	0	0	0
AT1G06340	14.3542	-4.691	1.61559	-2.90359	0.00368915	0.0534265	67.2101	5.06994	10.9035	2.9419	0	0
AT1G06350	0.980634	3.73913	3.96086	0.944021	0.345159	NA	0	0	0	5.88381	0	0
AT1G06360	12.4603	-0.806947	1.73612	-0.464798	0.642076	0.87741	0	44.9051	2.72587	15.6901	0	11.4409
AT1G06370	494.931	0.513286	0.239124	2.14653	0.0318308	0.204945	347.252	443.982	432.504	614.858	509.367	621.624
AT1G06380	68.0718	-1.01423	0.560872	-1.8083	0.0705592	0.315353	99.2149	69.5305	104.492	51.9736	60.3383	22.8819
AT1G06390	982.417	0.253129	0.204391	1.23845	0.215548	0.549251	786.518	1000.95	901.353	960.041	1034.17	1211.47
AT1G06400	1675.41	-0.0320097	0.217236	-0.14735	0.882856	0.967738	1260.99	2159.07	1661.87	1753.37	1631.94	1585.2
AT1G06410	3833.12	0.623476	0.169407	3.68034	0.000232925	0.00780709	2623.59	3373.68	3054.79	4357.94	4486.08	5102.66
AT1G06420	63.6942	0.908517	0.617066	1.47232	0.140935	0.450518	35.2053	30.4196	67.238	44.1285	72.9672	132.206
AT1G06430	692.029	0.135524	0.239316	0.566298	0.571191	0.841077	582.487	743.832	651.482	656.044	910.687	607.641
AT1G06440	26.9175	0.324419	1.04988	0.309004	0.757318	0.922832	0.80012	31.8682	39.0707	25.4965	21.0482	43.2213
AT1G06450	129.612	0.550381	0.420239	1.30968	0.190302	0.520037	118.418	129.645	67.238	145.134	129.096	188.14
AT1G06460	965.727	-0.0846334	0.19917	-0.424931	0.670887	0.888825	944.142	909.691	1128.51	943.37	1013.12	855.527
AT1G06470	359.416	0.0457979	0.277493	0.165042	0.868911	0.964465	301.645	447.603	311.657	384.409	384.481	326.702
AT1G06475	10.9339	0.196807	1.36299	0.144394	0.88519	0.969086	0.80012	18.8312	10.9035	7.84507	5.61286	21.6106
AT1G06480	0	NA	NA	NA	NA	NA	0	0	0	0	0	0
AT1G06490	8.3573	-0.544136	1.93601	-0.281061	0.778664	0.932352	28.0042	0	1.81724	14.7095	5.61286	0
AT1G06500	131.368	0.515506	0.434462	1.18654	0.235409	0.573285	105.616	147.752	70.8725	151.998	113.66	198.309
AT1G06510	346.86	0.0599465	0.256432	0.233772	0.815162	0.946836	361.654	324.476	332.556	317.725	349.401	395.348
AT1G06515	758.029	0.119747	0.260952	0.458884	0.646318	0.879104	778.517	723.552	677.832	741.359	551.464	1075.45
AT1G06520	6.42242	1.45038	1.61451	0.898342	0.369003	0.704861	0.80012	1.44855	8.1776	13.7289	4.20965	10.1697
AT1G06530	611.523	-0.360146	0.247979	-1.45232	0.146412	0.459084	555.283	866.959	639.67	535.426	596.367	475.434
AT1G06540	11.5215	1.43171	1.39813	1.02402	0.305827	0.645976	8.80132	0	9.99484	21.574	8.4193	20.3394
AT1G06550	253.712	0.348095	0.358407	0.971227	0.331435	0.670942	318.448	215.834	135.385	297.132	242.756	312.719
AT1G06560	145.065	0.857751	0.453671	1.89069	0.0586657	0.287181	122.418	55.7693	131.75	197.107	119.273	244.073
AT1G06570	1276.81	0.142321	0.196098	0.725763	0.467984	0.781606	1128.97	1129.15	1383.83	1261.1	1222.2	1535.63
AT1G06580	94.6562	0.616149	0.493627	1.24821	0.211955	0.546193	80.012	39.1109	105.4	119.637	122.08	101.697
AT1G06590	109.891	0.444421	0.513346	0.865734	0.386636	0.719699	152.823	82.5675	43.6139	114.734	161.37	104.24
AT1G06610	0	NA	NA	NA	NA	NA	0	0	0	0	0	0
AT1G06620	1211.1	0.426707	0.215714	1.97811	0.0479161	0.258179	853.728	948.802	1298.42	1539.6	1307.8	1318.25
AT1G06630	996.163	0.318627	0.202034	1.5771	0.114773	0.407783	947.342	964.736	746.887	1053.2	1210.98	1053.84
AT1G06640	1138.61	0.625549	0.194064	3.22342	0.00126668	0.0260621	797.72	944.457	944.058	1227.75	1380.76	1536.9
AT1G06645	1442.92	0.610953	0.180222	3.39001	0.000698895	0.0168865	1024.15	1120.46	1281.16	1675.9	1800.33	1755.55
AT1G06650	2215.63	0.58095	0.178182	3.26043	0.00111242	0.0240879	1873.88	1548.5	1904.47	2749.7	2866.77	2350.48
AT1G06660	29.3731	0.957513	0.778845	1.2294	0.218921	0.553118	18.4028	19.5555	21.8069	17.6514	50.5158	48.3062
AT1G06670	453.557	-0.303977	0.240982	-1.26141	0.20716	0.540514	541.681	438.187	524.275	438.343	360.627	418.23
AT1G06680	18259.2	-0.725516	0.196964	-3.6835	0.000230051	0.00774272	18769.2	27045.2	22453.9	15289.1	15396.1	10601.9
AT1G06690	402.366	-0.443062	0.2953	-1.50038	0.133517	0.436416	479.272	557.693	353.454	340.28	427.981	255.514
AT1G06700	1235.8	0.0415718	0.187478	0.221742	0.824515	0.950052	1189.78	1203.02	1260.26	1075.76	1363.93	1322.06
AT1G06710	20.2586	0.13432	1.01782	0.131969	0.895009	0.971907	24.0036	31.1439	2.72587	22.5546	18.2418	22.8819
AT1G06720	174.437	0.591752	0.340289	1.73897	0.0820398	0.340322	168.825	129.645	119.029	225.546	209.079	194.496
AT1G06730	129.706	-0.304026	0.383053	-0.793693	0.427374	0.752117	139.221	126.748	164.461	136.308	99.6283	111.867
AT1G06740.1	20.2824	-1.48157	0.974852	-1.51979	0.128563	0.428934	51.2077	24.6254	13.6293	5.88381	9.82251	16.5258
AT1G06750	9.66699	-0.6378	1.52438	-0.418399	0.675656	0.889793	20.8031	10.8641	3.63449	4.90317	0	17.797
AT1G06760	440.907	-0.480269	0.332472	-1.44454	0.148586	0.462557	276.842	707.618	556.077	353.028	425.174	326.702
AT1G06770	181.753	-0.944563	0.351933	-2.68393	0.00727632	0.0842334	265.64	275.225	176.273	107.87	133.306	132.206
AT1G06780	302.815	-0.0851283	0.273258	-0.31153	0.755397	0.922499	332.85	318.682	283.49	271.636	270.821	339.414
AT1G06790	60.9121	0.959193	0.554369	1.73024	0.0835871	0.344435	48.8073	47.8023	27.2587	60.7993	84.193	96.6123
AT1G06800	122.815	0.296601	0.444964	0.666573	0.505045	0.803911	151.223	91.9831	87.2277	96.1022	123.483	186.869
AT1G06810	7.25727	-0.239168	2.03547	-0.1175	0.906464	0.975947	0	0	23.6242	8.82571	9.82251	1.27121
AT1G06820	608.153	0.726774	0.237102	3.06523	0.00217499	0.0378985	543.281	426.599	404.337	783.527	851.752	639.421
AT1G06830	11.1346	-0.308735	1.28722	-0.239846	0.81045	0.945323	10.4016	23.9011	2.72587	16.6708	4.20965	8.8985
AT1G06840	308.651	-0.127919	0.319805	-0.399992	0.689163	0.895244	258.439	292.608	416.149	263.791	235.74	385.178
AT1G06850	105.669	-0.141684	0.564624	-0.250935	0.801864	0.94184	34.4052	189.036	109.035	101.005	91.209	109.324
AT1G06860	0.533413	-2.26838	3.97359	-0.570864	0.568092	NA	3.20048	0	0	0	0	0
AT1G06870	258.83	-0.076976	0.324626	-0.237122	0.812562	0.945696	278.442	189.036	329.83	219.662	238.547	297.464
AT1G06880	6.33994	-5.83822	2.50787	-2.32796	0.0199144	0.154768	34.4052	0	3.63449	0	0	0
AT1G06890	152.905	-0.578156	0.399673	-1.44657	0.148016	0.461462	242.436	166.584	140.836	159.843	113.66	94.0699
AT1G06900	326.977	-0.0393584	0.270272	-0.145625	0.884217	0.968459	330.45	275.225	388.89	317.725	324.143	325.431
AT1G06910	186.176	-0.461427	0.366909	-1.25761	0.208534	0.541776	184.028	235.39	228.064	198.088	169.789	101.697
AT1G06920	3.52397	0.971872	2.77059	0.350781	0.725753	0.911336	0.80012	0	6.36035	0	0	13.9834
AT1G06923	0	NA	NA	NA	NA	NA	0	0	0	0	0	0
AT1G06925	1.3784	-3.63962	3.93274	-0.925467	0.354723	NA	3.20048	5.06994	0	0	0	0
AT1G06930	17.719	-0.781369	1.42347	-0.548918	0.583062	0.847394	5.60084	61.5635	0	10.787	4.20965	24.1531
AT1G06950	783.351	-0.0184591	0.214101	-0.0862165	0.931294	0.984094	658.499	793.083	914.074	817.849	743.704	772.899
AT1G06960	357.232	-0.674434	0.26846	-2.51224	0.0119969	0.114399	476.071	421.529	420.692	296.152	217.498	311.448
AT1G06970	10.1836	0.964006	1.6756	0.57532	0.565075	0.837634	0.80012	0	19.9897	6.86444	4.20965	29.2379
AT1G06980	70.0654	-1.0376	0.65948	-1.57336	0.115636	0.408813	103.215	94.1559	85.4105	62.7606	65.9512	8.8985
AT1G06990	10.3107	1.16863	1.71366	0.681953	0.495269	0.798368	8.80132	10.1399	0	0	23.8547	19.0682
AT1G07000	2191.86	-0.114092	0.202415	-0.563655	0.572989	0.841708	2460.37	1982.34	2393.31	2351.56	2350.39	1613.17
AT1G07010	878.214	0.588264	0.285172	2.06284	0.0391278	0.231308	840.926	505.545	758.699	1191.47	1307.8	664.845
AT1G07020	388.298	-0.0849127	0.286924	-0.295942	0.767275	0.926455	312.047	491.059	396.159	428.537	408.336	293.651
AT1G07025	1.83879	1.48709	3.40918	0.436203	0.662689	NA	0	2.89711	0	6.86444	0	1.27121
AT1G07030	255.662	0.197425	0.324246	0.608874	0.542608	0.82543	191.229	243.357	280.764	339.299	203.466	275.854
AT1G07040	250.548	-0.168327	0.364966	-0.461213	0.644646	0.878788	286.443	169.481	339.825	212.798	178.208	316.532
AT1G07050	7.56035	-0.916493	1.90532	-0.481018	0.630503	0.871683	21.6032	0	8.1776	11.7676	0	3.81364
AT1G07051	0	NA	NA	NA	NA	NA	0	0	0	0	0	0
AT1G07060	0	NA	NA	NA	NA	NA	0	0	0	0	0	0
AT1G07070	55.6327	-0.75765	0.67382	-1.12441	0.260839	0.601821	44.8067	99.9502	65.4208	73.5476	32.274	17.797
AT1G07080	3110	-0.0538104	0.171093	-0.314509	0.753134	0.921796	2970.85	2960.84	3571.79	2708.51	3179.69	3268.29
AT1G07090	29.6288	0.751021	0.852856	0.880596	0.378537	0.713362	42.4064	13.7613	9.99484	23.5352	30.8708	57.2047
AT1G07100	0.467739	2.62903	4.02248	0.653585	0.513379	NA	0	0	0	0	2.80643	0
AT1G07110	5074.39	0.797314	0.205845	3.87338	0.000107338	0.00435033	3549.33	3636.59	3933.42	5003.2	8551.2	5772.59
AT1G07119	1.20018	-3.43759	3.93663	-0.873233	0.382536	NA	7.20108	0	0	0	0	0
AT1G07120	2.69882	1.04659	2.66268	0.393061	0.694274	0.898119	0	4.34566	0.908622	3.92254	7.01608	0
AT1G07128	40.4546	-0.641777	0.664342	-0.966033	0.334028	0.673586	64.8097	37.6624	45.4311	26.4771	23.8547	44.4925
AT1G07130	53.5675	-1.12508	0.57689	-1.95026	0.0511457	0.267458	85.6128	84.7404	49.9742	33.3416	30.8708	36.8652
AT1G07135	8950.13	-0.610317	0.173165	-3.52449	0.0004243	0.0117163	13173.2	10037.7	9235.23	6926.22	7181.66	7146.77
AT1G07140	1380.14	-0.177958	0.179361	-0.992179	0.32111	0.659535	1457.82	1423.2	1514.67	1265.02	1177.3	1442.83
AT1G07150	159.469	-0.534496	0.458944	-1.16462	0.244172	0.582282	172.026	126.748	267.135	81.3926	101.032	208.479
AT1G07160	246.861	0.640115	0.340306	1.881	0.059972	0.290406	197.63	141.958	239.876	355.97	328.353	217.378
AT1G07170	630.683	-0.338887	0.224262	-1.51112	0.130759	0.432149	716.907	761.215	634.218	510.91	651.092	509.757
AT1G07175	0	NA	NA	NA	NA	NA	0	0	0	0	0	0
AT1G07180	1268.51	0.0881315	0.224274	0.392964	0.694346	0.898157	1179.38	1222.58	1287.52	1438.59	1557.57	925.444
AT1G07190	2.67559	5.17312	3.21452	1.6093	0.107551	0.393813	0	0	0	5.88381	0	10.1697
AT1G07200	267.003	-0.137978	0.337315	-0.409048	0.682505	0.892504	393.659	197.003	248.962	276.539	218.902	266.955
AT1G07210	108.739	0.337382	0.507013	0.665432	0.505774	0.804603	164.025	51.4236	72.6898	106.889	141.725	115.681
AT1G07220	323.382	0.243483	0.286082	0.851097	0.394716	0.726025	327.249	255.67	305.297	328.512	434.997	288.566
AT1G07230	254.008	0.484581	0.310007	1.56313	0.118022	0.413076	164.025	207.867	263.5	296.152	325.546	266.955
AT1G07240	824.811	0.239448	0.280091	0.854894	0.39261	0.723954	612.892	767.009	890.449	972.789	551.464	1154.26
AT1G07250	359.289	-0.525603	0.259526	-2.02524	0.0428423	0.243431	387.258	385.315	499.742	293.21	287.659	302.549
AT1G07260	24.9102	0.461469	0.875365	0.527174	0.598073	0.855891	32.0048	17.3826	13.6293	42.1673	11.2257	33.0516
AT1G07270	12.9409	-1.38399	1.3883	-0.996894	0.318816	0.657989	4.80072	18.8312	32.7104	15.6901	5.61286	0
AT1G07280	1524.66	-0.0759897	0.22879	-0.332138	0.739785	0.916424	1128.97	1964.96	1600.99	1676.88	1295.17	1480.97
AT1G07290	19.4046	1.20041	0.911725	1.31663	0.187962	0.516463	8.0012	18.1069	9.08622	23.5352	32.274	25.4243
AT1G07300	536.265	0.812856	0.313589	2.5921	0.00953916	0.100317	351.253	397.628	417.966	443.247	561.286	1046.21
AT1G07310	969.261	0.395381	0.230038	1.71877	0.085657	0.34914	662.499	842.334	1007.66	1136.56	909.284	1257.23
AT1G07320	770.901	-0.696953	0.248628	-2.8032	0.00505983	0.0666285	732.91	1252.27	875.003	582.497	653.899	528.825
AT1G07330	5.21087	5.12972	2.12771	2.41091	0.0159127	0.136508	0	0	0.908622	11.7676	8.4193	10.1697
AT1G07340	6.22618	-5.81273	2.18241	-2.66344	0.00773461	0.0873479	27.2041	6.51849	3.63449	0	0	0
AT1G07350	856.668	-0.511651	0.224023	-2.28392	0.0223763	0.166091	1258.59	940.111	822.303	731.553	708.624	678.829
AT1G07360	758.904	0.0637789	0.210417	0.303106	0.761809	0.923773	685.703	673.577	867.734	798.236	745.108	783.068
AT1G07370	28.2956	-1.06319	1.07857	-0.985741	0.32426	0.662791	13.602	40.5595	60.8777	25.4965	0	29.2379
AT1G07380	69.5089	-0.125575	0.516156	-0.243289	0.807781	0.944534	72.0108	92.7074	52.7001	67.6638	78.5801	53.391
AT1G07390	91.098	-0.169601	0.482941	-0.351183	0.725451	0.911258	139.221	78.9461	70.8725	67.6638	99.6283	90.2562
AT1G07400	23.7983	-1.73312	1.00284	-1.72822	0.0839489	0.345251	25.6038	59.3907	24.5328	1.96127	8.4193	22.8819
AT1G07410	5.32575	6.16862	2.55639	2.41301	0.0158212	0.136056	0	0	0	23.5352	8.4193	0
AT1G07420	343.837	0.279414	0.307096	0.909859	0.362897	0.699724	364.055	207.143	360.723	315.764	397.11	418.23
AT1G07430	337.728	-1.37078	0.370427	-3.70054	0.000215141	0.00735846	592.089	312.887	555.168	110.812	273.627	181.784
AT1G07440	1278.83	0.0158962	0.241727	0.0657611	0.947568	0.988615	1287.39	1150.88	1376.56	1218.93	1731.57	907.647
AT1G07450	43.7625	-0.147788	0.621536	-0.237778	0.812053	0.945675	56.0084	34.041	48.157	50.0123	33.6772	40.6789
AT1G07460	0	NA	NA	NA	NA	NA	0	0	0	0	0	0
AT1G07470	822.083	-0.342532	0.199655	-1.71562	0.0862318	0.350331	882.532	988.637	885.906	703.115	799.833	672.473
AT1G07473	52.3563	1.35039	0.798131	1.69194	0.0906575	0.359778	50.4076	29.6953	8.1776	26.4771	51.919	147.461
AT1G07476	20.5541	0.833829	1.29575	0.643511	0.519892	0.813427	0	26.074	18.1724	4.90317	18.2418	55.9334
AT1G07480	903.826	-0.00309618	0.20585	-0.0150409	0.988	0.997851	919.338	1017.61	776.872	907.087	980.848	821.205
AT1G07485	0.28479	-1.35124	4.03196	-0.335132	0.737525	NA	0.80012	0	0.908622	0	0	0
AT1G07490	0	NA	NA	NA	NA	NA	0	0	0	0	0	0
AT1G07500	202.71	-0.738238	0.420445	-1.75585	0.0791137	0.334045	359.254	127.473	273.495	137.289	199.257	119.494
AT1G07510	266.756	-0.191733	0.321299	-0.596745	0.550678	0.829415	340.851	230.32	281.673	209.856	325.546	212.293
AT1G07520	211.639	-0.114974	0.381242	-0.301578	0.762974	0.924174	272.041	173.102	215.343	251.042	241.353	116.952
AT1G07530	289.737	0.117488	0.351014	0.334711	0.737843	0.915563	395.259	183.966	254.414	281.442	383.078	240.26
AT1G07540	0	NA	NA	NA	NA	NA	0	0	0	0	0	0
AT1G07550	0	NA	NA	NA	NA	NA	0	0	0	0	0	0
AT1G07560	0.266707	-1.26943	4.03914	-0.314283	0.753306	NA	1.60024	0	0	0	0	0
AT1G07570	97.4129	-0.330273	0.480999	-0.68664	0.49231	0.796915	149.622	73.8762	101.766	59.8187	92.6123	106.782
AT1G07580	0	NA	NA	NA	NA	NA	0	0	0	0	0	0
AT1G07590	1479.14	-0.410615	0.252385	-1.62694	0.10375	0.387558	2214.73	1783.17	1065.81	1122.83	1375.15	1313.16
AT1G07600	0	NA	NA	NA	NA	NA	0	0	0	0	0	0
AT1G07610	328.409	-0.730676	0.346666	-2.10772	0.0350551	0.216909	607.291	299.126	322.561	215.74	318.53	207.208
AT1G07615	95.5505	-0.210123	0.467047	-0.449897	0.652785	0.881862	67.2101	133.267	107.217	104.928	72.9672	87.7138
AT1G07620	126.12	-0.365024	0.476426	-0.766172	0.443574	0.763534	237.636	85.4646	102.674	92.1796	119.273	119.494
AT1G07630	408.28	-0.297577	0.29141	-1.02116	0.307179	0.647339	500.075	380.245	471.575	463.84	252.579	381.364
AT1G07640	15.5247	-0.271846	1.03281	-0.263209	0.792389	0.937898	16.8025	11.5884	22.7155	18.6321	5.61286	17.797
AT1G07645	0	NA	NA	NA	NA	NA	0	0	0	0	0	0
AT1G07650	765.18	0.0530754	0.247643	0.214322	0.830296	0.952701	765.715	662.713	825.029	686.444	620.221	1030.96
AT1G07660	521.996	-0.431863	0.270023	-1.59936	0.109741	0.396863	681.702	531.619	585.153	463.84	555.674	313.99
AT1G07670	321.177	0.443234	0.311873	1.4212	0.155259	0.473304	182.427	311.439	322.561	333.416	437.803	339.414
AT1G07680	0	NA	NA	NA	NA	NA	0	0	0	0	0	0
AT1G07690	0	NA	NA	NA	NA	NA	0	0	0	0	0	0
AT1G07700	1927.87	-0.0686421	0.191744	-0.357987	0.720353	0.908918	1900.28	1872.98	2147.98	1953.42	2172.18	1520.37
AT1G07702	0	NA	NA	NA	NA	NA	0	0	0	0	0	0
AT1G07705	328.065	0.294297	0.292075	1.00761	0.313642	0.653207	337.651	254.221	291.668	269.674	422.368	392.805
AT1G07710	43.948	1.55018	0.881344	1.75888	0.0785972	0.333729	14.4022	6.51849	46.3397	17.6514	49.1126	129.664
AT1G07720	595.999	-0.576264	0.303899	-1.89624	0.0579284	0.285505	952.143	589.561	598.782	431.479	335.369	668.659
AT1G07725	0	NA	NA	NA	NA	NA	0	0	0	0	0	0
AT1G07728	1.42001	-3.68099	3.93201	-0.936161	0.34919	NA	0	5.79421	2.72587	0	0	0
AT1G07730	0.211869	1.53911	4.08047	0.377189	0.706033	NA	0	0	0	0	0	1.27121
AT1G07740	28.3404	-0.103145	1.35002	-0.0764029	0.939099	0.986674	0	79.6704	8.1776	1.96127	42.0965	38.1364
AT1G07745	544.585	0.509123	0.23641	2.15356	0.031275	0.202811	424.864	526.549	396.159	566.807	708.624	644.506
AT1G07747	0	NA	NA	NA	NA	NA	0	0	0	0	0	0
AT1G07750	282.477	-0.871701	0.351076	-2.48294	0.0130302	0.120079	268.84	556.244	270.769	212.798	186.628	199.581
AT1G07760	0	NA	NA	NA	NA	NA	0	0	0	0	0	0
AT1G07770	350.014	-0.480039	0.289964	-1.65551	0.0978212	0.374999	331.25	512.063	379.804	288.306	244.16	344.499
AT1G07780	45.5874	-0.449069	0.635716	-0.706399	0.47994	0.789372	56.0084	52.1479	49.9742	55.8962	37.8868	21.6106
AT1G07790	287.694	-0.77869	0.425981	-1.82799	0.0675504	0.308094	186.428	575.076	328.921	248.1	269.417	118.223
AT1G07795	0	NA	NA	NA	NA	NA	0	0	0	0	0	0
AT1G07800.1	0	NA	NA	NA	NA	NA	0	0	0	0	0	0
AT1G07810	517.958	0.280708	0.265644	1.05671	0.290645	0.630325	392.059	396.904	615.137	626.625	489.722	587.301
AT1G07820	687.123	-1.07608	0.305945	-3.51722	0.00043609	0.011948	531.28	1259.52	1005.84	507.969	467.271	350.855
AT1G07830	247.394	0.161316	0.364125	0.443024	0.657748	0.883976	256.839	296.953	147.197	339.299	193.644	250.429
AT1G07840	411.258	0.338931	0.237138	1.42926	0.15293	0.469687	370.456	346.928	372.535	497.182	440.61	439.84
AT1G07850	12.8956	0.672613	1.6367	0.410958	0.681104	0.891735	0.80012	28.9711	0	15.6901	1.40322	30.5092
AT1G07860	0.65946	1.91167	4.0047	0.477355	0.633109	NA	0	0.724277	0	1.96127	0	1.27121
AT1G07870	500.642	0.0179465	0.234697	0.0764664	0.939048	0.986674	460.869	455.57	576.066	469.724	545.851	495.774
AT1G07880	16.2113	0.292188	1.42736	0.204705	0.837802	0.955021	41.6062	2.17283	0	29.419	12.6289	11.4409
AT1G07885	0	NA	NA	NA	NA	NA	0	0	0	0	0	0
AT1G07890	7599.38	-0.0653918	0.159687	-0.409499	0.682173	0.892382	6911.44	8397.26	8004.96	6862.48	8206.01	7214.14
AT1G07900	273.533	-2.72668	0.50399	-5.4102	6.3e-08	1.11e-05	644.097	199.176	582.427	47.0704	33.6772	134.749
AT1G07901	47.8254	0.100435	0.705665	0.142327	0.886822	0.969416	27.2041	26.7982	84.5018	29.419	49.1126	69.9168
AT1G07910	135.018	0.50834	0.369305	1.37648	0.168673	0.492214	108.016	106.469	119.938	144.153	145.934	185.597
AT1G07920	2132.72	-0.726925	0.17216	-4.22239	2.42e-05	0.00143461	2306.75	2740.66	2929.4	1579.8	1615.1	1624.61
AT1G07930	1186.39	0.031067	0.208967	0.148669	0.881815	0.967319	1176.98	1371.78	971.317	1198.34	1349.89	1050.02
AT1G07940	998.574	-0.149723	0.236448	-0.633219	0.526591	0.816315	782.517	1113.94	1253.9	776.662	1053.82	1010.62
AT1G07950	146.057	-0.437425	0.462595	-0.94559	0.344358	0.682657	241.636	135.44	126.298	63.7412	165.579	143.647
AT1G07960	657.11	0.259734	0.256858	1.0112	0.311922	0.651537	754.513	560.59	478.844	626.625	639.866	882.223
AT1G07970	127.225	-0.225705	0.392635	-0.574847	0.565395	0.837736	120.018	152.822	139.019	147.095	105.241	99.1547
AT1G07980	271.915	0.440466	0.27605	1.5956	0.110578	0.398785	226.434	251.324	214.435	334.396	308.708	296.193
AT1G07985	31.8634	-2.02431	0.910945	-2.22221	0.0262693	0.183328	111.217	12.3127	29.9845	13.7289	11.2257	12.7121
AT1G07990	534.858	-0.477655	0.251396	-1.90002	0.0574311	0.284576	739.311	534.516	593.33	405.002	541.641	395.348
AT1G08000	143.042	-0.477703	0.434034	-1.10061	0.271066	0.612055	196.029	136.888	167.186	145.134	61.7415	151.275
AT1G08005	3.66865	2.8556	2.62806	1.08658	0.277223	0.617749	0	0	2.72587	7.84507	0	11.4409
AT1G08010	516.168	-0.261135	0.236972	-1.10196	0.270477	0.611369	530.48	647.503	510.646	532.484	446.223	429.671
AT1G08030	438.352	0.00835863	0.337883	0.0247382	0.980264	0.996042	640.896	247.703	422.509	404.021	537.432	377.551
AT1G08032	0	NA	NA	NA	NA	NA	0	0	0	0	0	0
AT1G08035	10.9224	-1.55376	1.78689	-0.869533	0.384555	0.718019	30.4046	17.3826	0.908622	0	16.8386	0
AT1G08040	383.239	0.393633	0.251794	1.56331	0.117979	0.413076	360.054	320.13	313.475	437.363	488.319	380.093
AT1G08050	15.2285	0.786903	1.31155	0.599979	0.54852	0.828274	0	21.7283	11.8121	29.419	18.2418	10.1697
AT1G08060	122.657	0.80256	0.411379	1.9509	0.0510688	0.267189	81.6122	77.4976	109.035	117.676	154.354	195.767
AT1G08065	0.133353	-0.384446	4.08047	-0.0942159	0.924938	NA	0.80012	0	0	0	0	0
AT1G08070	38.7677	-0.0945051	0.768179	-0.123025	0.902088	0.974401	72.0108	14.4855	33.619	39.2254	49.1126	24.1531
AT1G08080	0.266707	-1.26943	4.03914	-0.314283	0.753306	NA	1.60024	0	0	0	0	0
AT1G08090	0.757185	-2.76357	3.9543	-0.698878	0.484628	NA	0	0	4.54311	0	0	0
AT1G08100	0	NA	NA	NA	NA	NA	0	0	0	0	0	0
AT1G08105.1	0.27215	-1.29268	4.03706	-0.320204	0.748814	NA	0	0.724277	0.908622	0	0	0
AT1G08110	1106.98	0.0578301	0.194762	0.296928	0.766522	0.926023	1237.79	926.35	1090.35	1114	1153.44	1119.94
AT1G08115	8.9737	3.87017	1.68333	2.29912	0.0214983	0.161941	0.80012	0	2.72587	1.96127	14.0322	34.3228
AT1G08120	3.39977	5.51971	2.67197	2.06579	0.0388488	0.23037	0	0	0	8.82571	1.40322	10.1697
AT1G08125	274.906	0.302758	0.303935	0.99613	0.319187	0.657989	187.228	260.74	290.759	328.512	324.143	258.057
AT1G08130	83.8586	-0.303281	0.48557	-0.624588	0.532242	0.819809	70.4106	107.917	99.9484	94.1409	51.919	78.8153
AT1G08135	1.06683	-3.26774	3.94034	-0.829305	0.406932	NA	6.40096	0	0	0	0	0
AT1G08140	0	NA	NA	NA	NA	NA	0	0	0	0	0	0
AT1G08150	1.85431	-4.06524	3.78223	-1.07483	0.282453	NA	10.4016	0.724277	0	0	0	0
AT1G08160	0	NA	NA	NA	NA	NA	0	0	0	0	0	0
AT1G08165	0	NA	NA	NA	NA	NA	0	0	0	0	0	0
AT1G08170	0	NA	NA	NA	NA	NA	0	0	0	0	0	0
AT1G08180	39.1393	-0.554488	0.652692	-0.84954	0.395581	0.726635	56.0084	46.3537	37.2535	26.4771	28.0643	40.6789
AT1G08190	521.783	-0.228479	0.257438	-0.88751	0.374804	0.710587	703.305	530.895	454.311	421.673	470.077	550.436
AT1G08200	1845.96	0.0626114	0.186348	0.335992	0.736877	0.915093	1781.07	1533.29	2103.46	1747.49	1961.7	1948.77
AT1G08210	288.616	0.654614	0.291157	2.24831	0.0245561	0.175597	282.442	187.588	202.623	343.222	366.239	349.584
AT1G08220	144.473	0.0553482	0.369388	0.149838	0.880893	0.96715	144.022	154.995	126.298	177.495	144.531	119.494
AT1G08230	1311.09	-0.878908	0.197207	-4.45679	8.32e-06	0.00066146	1618.64	1885.29	1590.09	767.837	1013.12	991.547
AT1G08240	0	NA	NA	NA	NA	NA	0	0	0	0	0	0
AT1G08250	311.285	0.0574481	0.342925	0.167524	0.866958	0.963874	269.64	234.666	411.606	392.254	353.61	205.937
AT1G08260	50.6619	-1.03059	0.627228	-1.64309	0.100365	0.380757	101.615	42.7323	59.969	40.206	23.8547	35.594
AT1G08270	14.7212	-0.223629	1.22237	-0.182948	0.854839	0.959769	15.2023	1.44855	30.8931	5.88381	19.645	15.2546
AT1G08280	41.7337	0.114754	0.710066	0.161611	0.871612	0.96509	68.0102	30.4196	21.8069	52.9542	50.5158	26.6955
AT1G08290	5.01675	1.25064	1.96116	0.637704	0.523666	0.815219	8.0012	0	0.908622	8.82571	9.82251	2.54243
AT1G08300	26.2861	0.475116	0.942264	0.504228	0.614101	0.864545	30.4046	6.51849	29.0759	13.7289	18.2418	59.7471
AT1G08310	281.129	-0.831647	0.295117	-2.81802	0.00483207	0.0647215	444.067	346.928	288.942	208.875	203.466	194.496
AT1G08315	354.558	-0.0350212	0.263597	-0.132859	0.894305	0.971493	371.256	315.785	389.799	372.641	381.675	296.193
AT1G08320	17.8812	-2.17692	1.08071	-2.01435	0.0439732	0.246664	18.4028	43.4566	26.35	13.7289	2.80643	2.54243
AT1G08340	3.20238	-0.368402	2.86308	-0.128674	0.897616	0.972677	0.80012	0	9.99484	0	8.4193	0
AT1G08350	117.276	-0.668792	0.46926	-1.4252	0.154098	0.471491	176.026	100.674	155.374	79.4314	56.1286	136.02
AT1G08360	1269.88	-0.0131446	0.205537	-0.0639528	0.949008	0.988693	1491.42	1164.64	1171.21	1386.62	1354.1	1051.29
AT1G08370	506.34	0.0849353	0.233401	0.363903	0.71593	0.907171	476.871	441.084	556.985	544.252	465.868	552.978
AT1G08380	26171.1	-0.880468	0.213517	-4.12365	3.73e-05	0.00197912	28703.5	39258.7	33792.6	21342.5	21328.9	12600.3
AT1G08390	239.332	-0.191656	0.392713	-0.488031	0.625528	0.870139	136.821	268.707	360.723	288.306	203.466	177.97
AT1G08400	118.358	-0.334978	0.4769	-0.702407	0.482425	0.790809	64.8097	197.727	133.567	114.734	105.241	94.0699
AT1G08410	222.562	0.55956	0.305731	1.83024	0.0672147	0.307389	157.624	212.213	169.912	278.5	253.982	263.141
AT1G08420	173.645	-0.22824	0.415785	-0.548937	0.583048	0.847394	214.432	218.007	129.933	190.243	88.4026	200.852
AT1G08430	0	NA	NA	NA	NA	NA	0	0	0	0	0	0
AT1G08440	0	NA	NA	NA	NA	NA	0	0	0	0	0	0
AT1G08450	2414.92	-0.546004	0.204318	-2.67233	0.0075327	0.0860664	3128.47	2994.88	2476.9	2330.97	2055.71	1502.58
AT1G08460	258.94	-0.185854	0.300169	-0.619166	0.535807	0.821608	256.839	326.649	242.602	206.914	277.837	242.802
AT1G08465	149.689	-0.375072	0.404386	-0.927509	0.353662	0.69173	177.627	201.349	128.116	124.541	89.8058	176.699
AT1G08470	93.9793	0.277664	0.43596	0.636902	0.524189	0.815219	86.413	90.5346	78.1415	120.618	81.3865	106.782
AT1G08480	679.96	-0.0309392	0.230902	-0.133993	0.893408	0.971139	628.894	576.524	856.83	675.657	683.366	658.489
AT1G08490	1085.6	-0.103264	0.228459	-0.452004	0.651266	0.881343	816.922	1270.38	1286.61	1136.56	928.929	1074.18
AT1G08500	16.6609	-1.54397	1.37983	-1.11896	0.263156	0.604664	2.40036	31.1439	40.888	3.92254	0	21.6106
AT1G08510	1032.17	0.131417	0.295767	0.444327	0.656806	0.8835	1170.58	964.736	820.486	1051.24	616.012	1569.95
AT1G08520	1314.66	-0.183766	0.22048	-0.833482	0.404573	0.734063	1341	1715.09	1137.59	1043.39	1206.77	1444.1
AT1G08530	276.744	-0.764547	0.32574	-2.34711	0.0189197	0.150082	258.439	332.443	454.311	178.475	183.821	252.972
AT1G08540	437.78	-0.295073	0.272717	-1.08197	0.279264	0.620132	465.67	605.495	375.261	370.68	457.448	352.126
AT1G08550	848.489	0.329529	0.280022	1.1768	0.239276	0.577321	580.887	647.503	1027.65	882.571	1240.44	711.88
AT1G08560	65.9599	-0.0147254	0.845773	-0.0174106	0.986109	0.997136	20.8031	168.756	9.08622	50.993	53.3222	92.7987
AT1G08570	2584.94	0.220652	0.17422	1.26652	0.205328	0.538178	2296.34	2611.02	2254.29	2532	3190.91	2625.06
AT1G08580	471.792	-0.605226	0.309179	-1.95752	0.0502859	0.264849	483.272	751.799	473.392	487.375	384.481	250.429
AT1G08590	3.133	-3.75912	2.94647	-1.2758	0.202025	0.533093	16.8025	0.724277	0	0	0	1.27121
AT1G08592	0	NA	NA	NA	NA	NA	0	0	0	0	0	0
AT1G08600	259.302	-0.282127	0.296351	-0.952004	0.341095	0.680092	330.45	277.398	245.328	205.933	266.611	230.09
AT1G08610	105.472	-0.138258	0.502533	-0.275123	0.783222	0.934186	124.019	95.6045	112.669	170.63	70.1608	59.7471
AT1G08620	337.58	0.279068	0.308115	0.905726	0.365081	0.701701	420.863	254.945	238.968	351.067	426.578	333.058
AT1G08630	75.5088	-0.371798	0.759111	-0.489781	0.624289	0.86972	28.0042	148.477	79.0501	50.0123	14.0322	133.478
AT1G08640	1105.23	-0.0839772	0.210771	-0.39843	0.690314	0.895856	997.75	1247.93	1167.58	1298.36	975.235	944.512
AT1G08650	1154.77	0.153826	0.202656	0.759052	0.447821	0.765967	1016.15	1025.58	1239.36	1425.84	1130.99	1090.7
AT1G08660	969.613	-0.289126	0.198921	-1.45347	0.146093	0.458988	1207.38	1021.23	971.317	948.273	801.236	868.24
AT1G08670	0.133353	-0.384446	4.08047	-0.0942159	0.924938	NA	0.80012	0	0	0	0	0
AT1G08680	335.949	0.282941	0.340146	0.831823	0.405509	0.734753	316.047	293.332	299.845	287.326	248.369	570.775
AT1G08695	1.35706	-3.61383	3.78231	-0.955456	0.339347	NA	5.60084	0.724277	1.81724	0	0	0
AT1G08700	218.363	0.476697	0.310404	1.53573	0.124604	0.423639	190.429	150.65	207.166	269.674	232.934	259.328
AT1G08710	458.463	0.491679	0.308076	1.59597	0.110497	0.398571	245.637	486.714	410.697	554.058	646.883	406.789
AT1G08720	333.611	0.786843	0.290136	2.71198	0.00668818	0.079612	233.635	295.505	205.349	465.801	329.756	471.621
AT1G08730	9.27394	1.04868	1.87248	0.560047	0.575447	0.842559	0	0	18.1724	6.86444	28.0643	2.54243
AT1G08735.1	0	NA	NA	NA	NA	NA	0	0	0	0	0	0
AT1G08740.1	0	NA	NA	NA	NA	NA	0	0	0	0	0	0
AT1G08750	292.802	-0.330837	0.29137	-1.13546	0.256184	0.596876	364.855	358.517	255.323	285.365	265.208	227.547
AT1G08760	196.044	-0.379217	0.313133	-1.21104	0.225879	0.562269	220.033	244.081	200.805	171.611	165.579	174.156
AT1G08770	326.892	-0.513512	0.284073	-1.80768	0.070657	0.315368	313.647	465.71	374.352	295.171	231.531	280.938
AT1G08780	226.915	-0.498007	0.306579	-1.6244	0.104291	0.38856	302.445	228.871	266.226	210.836	172.596	180.512
AT1G08790	0	NA	NA	NA	NA	NA	0	0	0	0	0	0
AT1G08800	298.343	0.0694408	0.35103	0.19782	0.843186	0.956109	368.055	198.452	307.114	260.849	225.918	429.671
AT1G08810	551.879	0.2929	0.286398	1.0227	0.306447	0.646587	572.886	474.401	439.773	382.447	718.447	723.321
AT1G08820	364.943	0.265508	0.261823	1.01407	0.310548	0.650455	393.659	277.398	323.469	402.06	390.094	402.975
AT1G08830	2508.17	-0.134747	0.167384	-0.805022	0.420807	0.746986	2789.22	2737.77	2347.88	2340.77	2583.32	2250.05
AT1G08840	213.12	-0.124208	0.367883	-0.337629	0.735643	0.914688	307.246	187.588	171.73	162.785	182.418	266.955
AT1G08845	238.133	0.102458	0.42053	0.243641	0.807509	0.944534	132.02	203.522	354.363	360.873	207.676	170.343
AT1G08860	0.445738	2.56749	4.02744	0.637499	0.5238	NA	0	0	0	0	1.40322	1.27121
AT1G08870	0	NA	NA	NA	NA	NA	0	0	0	0	0	0
AT1G08880	375.812	-0.572747	0.334117	-1.71421	0.08649	0.350839	278.442	577.248	493.382	375.583	217.498	312.719
AT1G08890	1061.54	0.422124	0.337685	1.25005	0.211281	0.54539	996.949	690.96	1034.01	761.953	794.22	2091.15
AT1G08900	3292.62	0.396684	0.163397	2.42773	0.0151937	0.132719	2851.63	2739.21	2936.67	3379.27	4220.87	3628.05
AT1G08910	856.967	0.165842	0.196519	0.8439	0.398725	0.729035	868.13	741.659	814.125	966.905	843.333	907.647
AT1G08920	936.087	-0.0672	0.252867	-0.265752	0.79043	0.937173	997.75	866.235	1009.48	944.351	1188.52	610.183
AT1G08930	16785.1	0.00960184	0.175717	0.0546438	0.956422	0.990409	19424.5	14988.2	15775.5	18297.7	18253	13971.9
AT1G08940	342.281	-0.45898	0.31209	-1.47066	0.141382	0.451281	408.061	405.595	374.352	191.224	277.837	396.619
AT1G08950	0	NA	NA	NA	NA	NA	0	0	0	0	0	0
AT1G08960	125.839	0.0614617	0.431836	0.142326	0.886822	0.969416	92.0138	107.193	170.821	166.708	117.87	100.426
AT1G08970	326.75	-0.704723	0.266633	-2.64304	0.00821643	0.0909679	412.862	392.558	408.88	207.894	276.434	261.87
AT1G08980	2152.46	0.410549	0.187539	2.18914	0.0285866	0.192858	1910.69	1626	2008.05	2428.05	2845.72	2096.23
AT1G08985	32.8771	0.576256	0.997582	0.577653	0.563499	0.836376	44.8067	33.3167	0.908622	23.5352	33.6772	61.0183
AT1G08990	0.944359	-3.0908	3.9447	-0.783533	0.433314	NA	2.40036	1.44855	1.81724	0	0	0
AT1G09000	9.97518	-0.0577309	1.41067	-0.0409244	0.967356	0.993644	21.6032	0.724277	8.1776	8.82571	15.4354	5.08486
AT1G09010	827.257	0.345398	0.243979	1.41569	0.156867	0.475204	856.928	733.692	594.239	697.231	1086.09	995.361
AT1G09020	483.038	-0.295276	0.290776	-1.01548	0.309879	0.649895	522.478	724.277	349.819	456.976	425.174	419.501
AT1G09026	0	NA	NA	NA	NA	NA	0	0	0	0	0	0
AT1G09030	0	NA	NA	NA	NA	NA	0	0	0	0	0	0
AT1G09040	51.7456	0.0624921	0.793339	0.0787709	0.937215	0.986038	31.2047	10.1399	110.852	69.625	50.5158	38.1364
AT1G09050	44.1759	-0.208271	0.730828	-0.28498	0.77566	0.930777	45.6068	81.8432	14.538	48.0511	40.6933	34.3228
AT1G09060	315.195	0.473392	0.32723	1.44666	0.147991	0.461462	336.05	215.834	239.876	388.331	464.464	246.616
AT1G09070	22512.6	0.0444493	0.147913	0.300509	0.763789	0.924248	19755.8	23549.9	23191.7	23052.7	23749.4	21775.9
AT1G09080	109.29	2.47538	0.61693	4.01242	6.01e-05	0.00287126	8.0012	53.5965	38.1621	92.1796	200.66	263.141
AT1G09090	2.03998	4.78331	3.55964	1.34376	0.179025	NA	0	0	0	5.88381	0	6.35607
AT1G09100	167.107	0.298084	0.332955	0.895268	0.370644	0.706642	167.225	139.785	142.654	178.475	183.821	190.682
AT1G09110	0	NA	NA	NA	NA	NA	0	0	0	0	0	0
AT1G09130	1041.17	-0.064172	0.185501	-0.34594	0.729388	0.912725	1092.16	1046.58	1054.91	1116.94	976.638	959.767
AT1G09140	4218.64	-0.231762	0.16256	-1.4257	0.153956	0.471301	4971.15	4292.06	4405.91	3498.9	4288.23	3855.59
AT1G09150	321.827	-0.147745	0.26548	-0.556519	0.577856	0.843676	329.649	371.554	313.475	312.822	333.965	269.498
AT1G09155	0.233869	1.53911	4.08047	0.377189	0.706033	NA	0	0	0	0	1.40322	0
AT1G09157	43.0592	0.874841	0.817267	1.07045	0.284418	0.62512	11.2017	50.6994	29.0759	18.6321	40.6933	108.053
AT1G09160	1128.07	0.664811	0.192061	3.46145	0.000537271	0.0138723	839.326	890.136	888.632	1344.45	1219.39	1586.48
AT1G09170	2.0767	1.30444	3.63201	0.359151	0.719482	NA	0	0	3.63449	8.82571	0	0
AT1G09176	2.04105	0.642341	3.26115	0.196968	0.843853	NA	4.80072	0	0	4.90317	0	2.54243
AT1G09180	128.497	0.829994	0.499185	1.6627	0.0963731	0.372428	107.216	102.847	67.238	169.65	255.385	68.6456
AT1G09190	59.4359	0.445892	0.67726	0.658377	0.510296	0.80759	30.4046	89.8103	30.8931	110.812	33.6772	61.0183
AT1G09195	187.302	0.442412	0.381202	1.16057	0.245816	0.584597	236.035	115.884	124.481	207.894	199.257	240.26
AT1G09200	269.164	-1.64652	0.45554	-3.61445	0.00030099	0.00924425	166.425	679.371	378.895	187.301	103.838	99.1547
AT1G09210	566.242	0.000742604	0.239707	0.00309796	0.997528	0.999436	568.885	478.023	652.391	658.986	533.222	505.943
AT1G09220	25.1123	0.156397	0.882399	0.177241	0.859319	0.961802	19.2029	42.008	9.99484	28.4384	15.4354	35.594
AT1G09230	1293.47	0.184436	0.192758	0.956827	0.338655	0.677727	1244.99	1169.71	1217.55	1340.53	1610.89	1177.14
AT1G09240	588.613	-1.20351	0.298684	-4.02937	5.59e-05	0.00271496	973.746	563.487	926.794	488.356	293.272	286.023
AT1G09245	1.02949	-0.512927	3.91708	-0.130946	0.895818	NA	0	0	3.63449	0	0	2.54243
AT1G09250	1062.99	-0.696087	0.235171	-2.95992	0.00307719	0.0474969	1583.44	1072.65	1286.61	704.095	1024.35	706.795
AT1G09260	1.60024	-3.85247	3.92919	-0.980476	0.326851	NA	9.60144	0	0	0	0	0
AT1G09270	716.171	0.236105	0.200999	1.17466	0.240131	0.578374	648.897	673.577	650.573	795.294	818.075	710.609
AT1G09280	247.172	0.479342	0.348544	1.37527	0.169049	0.492558	227.234	155.719	237.15	376.564	291.869	194.496
AT1G09290	159.689	-0.492414	0.389125	-1.26544	0.205714	0.538611	148.822	212.937	198.988	176.514	91.209	129.664
AT1G09300	164.182	0.420501	0.369438	1.13822	0.25503	0.595504	166.425	160.065	94.4967	183.379	182.418	198.309
AT1G09310	9420.29	-0.0163757	0.192381	-0.0851213	0.932165	0.984278	9659.85	8732.6	10027.6	6993.88	9708.85	11399
AT1G09320	77.3267	-0.184843	0.599116	-0.308526	0.757682	0.922936	57.6086	83.2918	106.309	91.199	23.8547	101.697
AT1G09330	541.452	0.10734	0.234016	0.458685	0.646461	0.879238	524.079	559.866	480.661	663.889	493.932	526.283
AT1G09340	5297.35	-0.350068	0.198589	-1.76277	0.0779388	0.332209	4799.12	6835.72	6176.81	5509.2	4724.63	3738.64
AT1G09350	9.30686	-1.10252	2.06797	-0.53314	0.593937	0.853673	0	32.5924	5.45173	0	0	17.797
AT1G09360	0	NA	NA	NA	NA	NA	0	0	0	0	0	0
AT1G09370	0	NA	NA	NA	NA	NA	0	0	0	0	0	0
AT1G09380	0.151437	-0.384446	4.08047	-0.0942159	0.924938	NA	0	0	0.908622	0	0	0
AT1G09390	317.592	-0.428587	0.267094	-1.60463	0.108575	0.3955	322.448	388.936	381.621	261.829	300.288	250.429
AT1G09400	37.1643	-0.98642	0.747723	-1.31923	0.187091	0.515676	61.6092	49.9751	36.3449	10.787	21.0482	43.2213
AT1G09410	37.8293	0.430373	1.05246	0.408922	0.682597	0.892504	0	63.0121	33.619	40.206	39.29	50.8486
AT1G09415	471.45	-0.617476	0.247931	-2.49051	0.012756	0.118557	548.082	570.73	594.239	430.498	391.497	293.651
AT1G09420	159.38	0.261319	0.365177	0.715596	0.474241	0.785165	166.425	135.44	133.567	221.623	140.322	158.902
AT1G09421	0	NA	NA	NA	NA	NA	0	0	0	0	0	0
AT1G09430	1171.99	0.37706	0.239775	1.57255	0.115822	0.409027	1012.95	1196.5	848.653	1025.74	1217.99	1730.12
AT1G09440	97.7834	0.532625	0.486776	1.09419	0.273872	0.614768	85.6128	84.7404	69.0553	62.7606	119.273	165.258
AT1G09450	1.2595	0.144631	3.87012	0.0373712	0.970189	NA	0	0	3.63449	3.92254	0	0
AT1G09460	0.635607	3.09156	3.99113	0.77461	0.43857	NA	0	0	0	0	0	3.81364
AT1G09470	1.06006	-3.25144	3.94072	-0.825088	0.409322	NA	0	0	6.36035	0	0	0
AT1G09480	238.429	0.273009	0.3986	0.684919	0.493395	0.797055	287.243	158.617	201.714	168.669	206.273	408.06
AT1G09483	1.49955	1.4641	3.32685	0.440087	0.659874	NA	2.40036	0	0	3.92254	1.40322	1.27121
AT1G09486	45.5542	1.99212	0.667464	2.9846	0.00283946	0.0450486	20.8031	7.96704	26.35	69.625	65.9512	82.629
AT1G09490	2119.03	0.0556978	0.21026	0.2649	0.791087	0.937319	2488.37	1846.91	1898.11	1926.95	2692.77	1861.06
AT1G09500	1058.58	0.580886	0.300579	1.93256	0.0532907	0.273839	880.932	757.593	905.896	1132.63	1957.49	716.965
AT1G09510	16.2701	0.562323	1.07482	0.523179	0.60085	0.857426	23.2035	10.8641	5.45173	35.3028	12.6289	10.1697
AT1G09520	400.627	-0.356404	0.273336	-1.3039	0.192266	0.521883	419.263	509.166	421.601	424.615	363.433	265.684
AT1G09530	912.83	-0.848056	0.347321	-2.44171	0.014618	0.129298	1844.28	1018.33	658.751	703.115	395.707	856.799
AT1G09540	0.133353	-0.384446	4.08047	-0.0942159	0.924938	NA	0.80012	0	0	0	0	0
AT1G09550	0	NA	NA	NA	NA	NA	0	0	0	0	0	0
AT1G09560	1208.54	-0.670571	0.200053	-3.35196	0.000802419	0.0188573	1555.43	1634.69	1262.08	814.907	956.993	1027.14
AT1G09570	1328.13	0.278772	0.228499	1.22002	0.222459	0.557908	984.148	1477.52	1137.59	1138.52	1711.92	1519.1
AT1G09575	798.177	-0.776785	0.238514	-3.25677	0.00112687	0.0243396	772.916	1144.36	1105.79	506.988	694.592	564.419
AT1G09580	114.765	0.215143	0.471823	0.455982	0.648403	0.880175	116.017	118.781	83.5932	83.3539	89.8058	197.038
AT1G09590	950.882	-0.429315	0.196077	-2.18952	0.0285589	0.192858	1127.37	1106.69	1040.37	893.358	830.704	706.795
AT1G09600	0.233869	1.53911	4.08047	0.377189	0.706033	NA	0	0	0	0	1.40322	0
AT1G09610	17.9689	1.91467	1.4562	1.31484	0.188564	0.516877	0	22.4526	0	18.6321	33.6772	33.0516
AT1G09620	491.678	0.376134	0.268924	1.39866	0.161914	0.482444	347.252	416.459	520.64	557.981	437.803	669.93
AT1G09625	4.0006	-5.17423	3.22024	-1.60678	0.108102	0.394662	24.0036	0	0	0	0	0
AT1G09630	132.08	-0.121047	0.454532	-0.266311	0.79	0.937014	162.424	88.3617	162.643	154.94	71.564	152.546
AT1G09640	559.853	0.133991	0.241033	0.555902	0.578278	0.844041	446.467	490.335	665.111	570.729	599.173	587.301
AT1G09645	572.007	-0.0912983	0.235026	-0.38846	0.697676	0.899511	494.474	616.359	659.66	538.368	493.932	629.251
AT1G09650	12.2274	1.03687	1.736	0.597276	0.550323	0.829086	0	23.9011	0	2.9419	35.0804	11.4409
AT1G09660	731.372	0.159422	0.23238	0.68604	0.492688	0.796915	749.712	551.174	773.237	882.571	663.721	767.814
AT1G09665	0	NA	NA	NA	NA	NA	0	0	0	0	0	0
AT1G09680	35.9259	0.480983	0.708193	0.679169	0.497031	0.799214	44.0066	30.4196	15.4466	39.2254	40.6933	45.7637
AT1G09690	2693.46	-0.283498	0.15619	-1.81509	0.0695108	0.31325	3105.27	2847.13	2919.4	2471.2	2511.76	2305.98
AT1G09700	59.6752	1.25305	0.562566	2.22738	0.0259217	0.181866	38.4058	38.3867	29.0759	111.792	86.9994	53.391
AT1G09710	180.022	0.475714	0.331473	1.43515	0.151244	0.467032	171.226	125.3	155.374	201.03	203.466	223.734
AT1G09720	0.423738	2.50395	4.03277	0.620901	0.534665	NA	0	0	0	0	0	2.54243
AT1G09730	517.837	0.106711	0.265372	0.40212	0.687596	0.894666	370.456	520.031	606.051	547.194	451.836	611.454
AT1G09740	218.964	-0.908867	0.355328	-2.55782	0.0105329	0.106029	274.441	356.344	226.247	134.347	116.467	205.937
AT1G09750	172.502	-0.180806	0.391456	-0.461881	0.644167	0.878643	144.822	261.464	143.562	189.262	172.596	123.308
AT1G09760	224.578	-0.4439	0.349578	-1.26982	0.20415	0.536113	314.447	275.949	186.267	224.565	207.676	138.562
AT1G09770	677.165	-0.281495	0.265355	-1.06083	0.288769	0.629251	976.946	541.035	711.451	611.916	513.577	708.067
AT1G09780	624.747	-0.240692	0.226476	-1.06277	0.287888	0.628451	612.892	755.42	662.385	614.858	481.303	621.624
AT1G09790	0.423738	2.50395	4.03277	0.620901	0.534665	NA	0	0	0	0	0	2.54243
AT1G09794	79.9559	-0.381617	0.523969	-0.728319	0.466418	0.780479	119.218	91.2588	60.8777	79.4314	86.9994	41.9501
AT1G09795	649.479	-0.068134	0.26209	-0.259964	0.794891	0.93887	529.679	887.963	576.066	554.058	611.802	737.304
AT1G09800	162.931	0.712104	0.479033	1.48654	0.137135	0.443485	136.821	170.929	62.6949	218.681	102.435	286.023
AT1G09810	246.276	0.585058	0.343917	1.70116	0.088913	0.356352	265.64	200.625	124.481	287.326	279.24	320.346
AT1G09812	0	NA	NA	NA	NA	NA	0	0	0	0	0	0
AT1G09815	240.04	-0.255623	0.323319	-0.790623	0.429164	0.753521	271.241	279.571	233.516	284.384	206.273	165.258
AT1G09820	25.8298	0.689386	0.890878	0.773828	0.439033	0.760252	13.602	34.7653	10.9035	45.1092	37.8868	12.7121
AT1G09830	179.585	-0.496833	0.37955	-1.30901	0.190532	0.520192	156.023	276.674	198.08	156.901	108.048	181.784
AT1G09840	725.115	0.206077	0.23063	0.893538	0.371569	0.707445	731.31	590.285	698.73	705.076	669.334	955.953
AT1G09850	324.98	0.342006	0.292645	1.16867	0.242535	0.580546	224.834	262.912	372.535	374.602	384.481	330.516
AT1G09860	14.5978	1.29161	1.73676	0.743691	0.457064	0.772553	0	0	25.4414	0.980634	42.0965	19.0682
AT1G09870	786.457	-0.416384	0.215824	-1.92928	0.0536965	0.274923	838.526	982.843	875.003	593.284	799.833	629.251
AT1G09880	14.5836	-2.2957	1.58746	-1.44615	0.148136	0.461698	0	42.008	30.8931	10.787	0	3.81364
AT1G09890	0.690445	0.657192	3.99094	0.164671	0.869203	NA	1.60024	0	0	0	0	2.54243
AT1G09900	62.7584	0.136003	0.630211	0.215805	0.82914	0.952077	86.413	26.074	67.238	94.1409	64.5479	38.1364
AT1G09910	305.597	-0.201546	0.281488	-0.716002	0.47399	0.784956	351.253	288.262	341.642	294.19	231.531	326.702
AT1G09920	633.95	-0.124873	0.25113	-0.497242	0.619019	0.866465	562.484	873.477	547.899	644.277	604.786	570.775
AT1G09930	33.861	0.321218	0.78015	0.411739	0.680531	0.891732	18.4028	53.5965	18.1724	30.3997	26.6611	55.9334
AT1G09932	190.992	0.945553	0.467546	2.02237	0.0431377	0.244057	195.229	91.2588	105.4	356.951	289.062	108.053
AT1G09935	0	NA	NA	NA	NA	NA	0	0	0	0	0	0
AT1G09940	2410.5	0.309436	0.189276	1.63484	0.102083	0.383589	1761.06	2126.48	2572.31	2808.54	2464.05	2730.57
AT1G09950	2580.28	-0.265639	0.229494	-1.1575	0.247067	0.584922	1882.68	3196.96	3372.8	2717.34	2134.29	2177.59
AT1G09960	5.39419	-5.60478	2.33969	-2.39553	0.0165965	0.139478	0.80012	15.2098	16.3552	0	0	0
AT1G09970	6308.68	0.357967	0.186444	1.91997	0.0548618	0.278191	4720.71	5295.19	6574.79	6837.96	6137.67	8285.78
AT1G09980	544.762	0.266036	0.240864	1.10451	0.269374	0.610524	460.069	549.002	475.209	620.741	477.093	686.456
AT1G09995	248.316	0.0841717	0.300601	0.280012	0.779469	0.932834	226.434	281.744	214.435	223.585	293.272	250.429
AT1G10000	84.8487	-0.165378	0.481142	-0.343719	0.731057	0.91331	121.618	62.2878	85.4105	88.2571	70.1608	81.3577
AT1G10010	3.48904	3.42807	2.72908	1.25612	0.209071	0.542412	0	0	1.81724	0	14.0322	5.08486
AT1G10020	547.907	1.12397	0.739289	1.52033	0.128427	0.428748	84.8127	422.253	527.001	752.146	526.206	975.022
AT1G10030	94.9341	-0.512736	0.555753	-0.922596	0.356218	0.693957	88.0132	190.485	56.3346	98.0634	88.4026	48.3062
AT1G10040	47.9754	-1.76842	0.636744	-2.77728	0.0054816	0.0705079	95.2143	62.2878	65.4208	29.419	12.6289	22.8819
AT1G10050	161.643	0.179437	0.36494	0.49169	0.622938	0.869185	122.418	171.654	160.826	193.185	190.837	130.935
AT1G10060	3.71556	-5.06888	2.87368	-1.7639	0.0777491	0.332023	13.602	8.69132	0	0	0	0
AT1G10070	263.886	0.329576	0.460573	0.715578	0.474252	0.785165	163.224	240.46	298.028	213.778	126.289	541.537
AT1G10090	524.913	0.520583	0.235816	2.20758	0.0272733	0.187516	410.462	434.566	448.859	607.993	519.19	728.406
AT1G10095	169.93	-0.089747	0.421281	-0.213034	0.831301	0.952821	92.8139	191.933	240.785	130.424	162.773	200.852
AT1G10100	0.538747	2.87344	4.0047	0.717517	0.473055	NA	0	0	0	1.96127	0	1.27121
AT1G10110	11.405	0.00306822	1.38644	0.00221301	0.998234	0.999525	9.60144	17.3826	7.26898	17.6514	0	16.5258
AT1G10120	155.406	0.79066	0.45967	1.72006	0.0854212	0.348584	53.608	145.58	142.654	235.352	127.693	227.547
AT1G10130	829.806	0.133713	0.224901	0.594543	0.552149	0.830108	724.109	761.939	888.632	862.958	698.802	1042.4
AT1G10140	1335.62	-0.0440045	0.240355	-0.183082	0.854734	0.959769	1080.16	1484.77	1503.77	1392.5	931.735	1620.8
AT1G10150	716.483	0.621377	0.223869	2.77562	0.00550963	0.0707389	589.688	472.953	631.492	856.094	764.753	983.92
AT1G10155	36.128	-0.0184006	0.768441	-0.0239454	0.980896	0.9961	68.8103	23.9011	16.3552	36.2835	29.4675	41.9501
AT1G10160.1	195.421	0.448099	0.409715	1.09369	0.274093	0.615001	104.016	224.526	167.186	180.437	168.386	327.973
AT1G10170	359.074	0.590954	0.320791	1.84217	0.0654496	0.303468	232.035	219.456	408.88	451.092	339.578	503.401
AT1G10180	108.623	0.24539	0.451525	0.543469	0.586807	0.849717	58.4088	110.09	129.933	129.444	109.451	114.409
AT1G10190	0.120713	-0.384446	4.08047	-0.0942159	0.924938	NA	0	0.724277	0	0	0	0
AT1G10200	1192.92	-0.126792	0.211204	-0.60033	0.548286	0.828274	1092.16	1331.22	1312.96	1140.48	920.51	1360.2
AT1G10210	174.878	0.549609	0.370549	1.48323	0.138014	0.445301	121.618	168.032	136.293	207.894	145.934	269.498
AT1G10220	22.0607	-0.215955	1.0799	-0.199976	0.841499	0.955809	15.2023	31.1439	24.5328	0.980634	35.0804	25.4243
AT1G10230	46.175	-0.0166408	0.6858	-0.0242648	0.980641	0.9961	22.4034	36.9381	79.9587	34.3222	58.9351	44.4925
AT1G10240	76.2461	1.26593	0.488358	2.59222	0.00953577	0.100317	38.4058	55.7693	39.9794	100.025	130.499	92.7987
AT1G10250	0	NA	NA	NA	NA	NA	0	0	0	0	0	0
AT1G10260.1	0	NA	NA	NA	NA	NA	0	0	0	0	0	0
AT1G10270	41.2478	1.77018	0.729596	2.42625	0.0152558	0.1329	8.80132	32.5924	14.538	66.6831	84.193	40.6789
AT1G10280	80.9629	0.00907266	0.558966	0.0162312	0.98705	0.997513	48.8073	53.5965	139.928	84.3345	96.8219	62.2895
AT1G10290	522.226	-0.0463239	0.278629	-0.166257	0.867955	0.964094	732.11	391.834	467.94	498.162	482.706	560.606
AT1G10300	0.935477	3.64129	3.96462	0.918445	0.358386	NA	0	0	0	0	5.61286	0
AT1G10310	438.56	0.501673	0.254513	1.97111	0.048711	0.260711	287.243	383.867	417.966	471.685	543.045	527.554
AT1G10320	718.338	0.131879	0.210994	0.625039	0.531946	0.819809	691.304	697.478	666.929	636.432	806.849	811.035
AT1G10330	25.4616	-1.83	0.994863	-1.83945	0.0658492	0.303901	7.20108	81.8432	29.9845	6.86444	15.4354	11.4409
AT1G10340	109.459	0.17792	0.501626	0.354687	0.722824	0.909857	123.218	47.8023	137.202	107.87	152.951	87.7138
AT1G10350	148.799	-0.48451	0.41917	-1.15588	0.24773	0.585991	134.42	222.353	164.461	178.475	106.644	86.4426
AT1G10360	470.117	-0.61671	0.338773	-1.82043	0.0686943	0.311483	570.486	638.088	497.925	342.241	571.109	200.852
AT1G10370	703.469	0.399764	0.303564	1.3169	0.187872	0.516463	692.104	474.401	653.299	589.361	596.367	1215.28
AT1G10380	4.46254	-0.39951	2.59457	-0.153979	0.877626	0.966658	15.2023	0	0	0	1.40322	10.1697
AT1G10385	0	NA	NA	NA	NA	NA	0	0	0	0	0	0
AT1G10390	510.518	0.0150128	0.249524	0.0601656	0.952024	0.989533	544.082	417.908	562.437	560.923	420.965	556.792
AT1G10400	18.4418	1.90897	1.22559	1.5576	0.119328	0.415289	8.80132	0	14.538	11.7676	46.3061	29.2379
AT1G10410	480.72	-0.408575	0.277864	-1.47041	0.14145	0.451281	573.686	501.924	570.615	507.969	275.03	455.095
AT1G10417	53.2564	-0.28129	0.592793	-0.474516	0.635132	0.873894	51.2077	39.8352	84.5018	56.8768	47.7093	39.4077
AT1G10419	0	NA	NA	NA	NA	NA	0	0	0	0	0	0
AT1G10430	639.622	0.278671	0.236842	1.17661	0.239351	0.577385	604.091	465.71	664.203	635.451	811.059	657.218
AT1G10440	0	NA	NA	NA	NA	NA	0	0	0	0	0	0
AT1G10450	84.1842	0.015537	0.536681	0.0289502	0.976904	0.995187	43.2065	119.506	88.1363	56.8768	98.2251	99.1547
AT1G10455	0	NA	NA	NA	NA	NA	0	0	0	0	0	0
AT1G10460	1.81724	-4.03166	3.92658	-1.02676	0.304532	NA	0	0	10.9035	0	0	0
AT1G10470	3730.92	-0.846419	0.248043	-3.41238	0.000643975	0.0158319	3495.72	4398.53	6490.29	2468.26	3477.17	2055.55
AT1G10480	2.30317	-4.3772	3.46442	-1.26347	0.206419	NA	12.0018	0	1.81724	0	0	0
AT1G10490	175.92	0.355021	0.422468	0.840349	0.400713	0.730204	147.222	84.0161	232.607	244.178	166.983	180.512
AT1G10500	293.076	0.458981	0.280704	1.6351	0.102027	0.383451	216.032	231.044	293.485	314.784	366.239	336.872
AT1G10510	328.757	0.256693	0.282484	0.908701	0.363508	0.700312	283.242	311.439	303.48	311.842	457.448	305.092
AT1G10520	18.3349	-0.350759	1.41099	-0.24859	0.803678	0.942924	55.2083	2.89711	3.63449	21.574	0	26.6955
AT1G10522	257.638	-0.0430727	0.304984	-0.14123	0.887689	0.969756	240.036	267.982	277.13	320.667	231.531	208.479
AT1G10530	22.3342	-0.0761697	0.863146	-0.0882465	0.929681	0.983503	32.8049	19.5555	16.3552	16.6708	16.8386	31.7804
AT1G10538	0	NA	NA	NA	NA	NA	0	0	0	0	0	0
AT1G10540	3.96563	2.69222	2.90733	0.92601	0.354441	0.692545	3.20048	0	0	20.5933	0	0
AT1G10550	389.332	1.51009	0.900105	1.67768	0.0934093	0.365603	189.628	47.8023	369.809	557	239.95	931.8
AT1G10560	82.3439	-0.911457	0.493144	-1.84826	0.064565	0.300956	89.6134	108.641	124.481	55.8962	37.8868	77.5441
AT1G10570	1143.04	0.243024	0.193272	1.25742	0.208602	0.541776	1141.77	1025.58	973.134	1120.86	1187.12	1409.78
AT1G10580	614.537	-0.0138963	0.226484	-0.0613563	0.951075	0.989283	604.891	640.26	607.868	651.141	495.335	687.727
AT1G10585	37.9984	-1.34115	0.755759	-1.77458	0.0759679	0.32862	76.8115	44.1809	42.7052	25.4965	7.01608	31.7804
AT1G10586	7.45833	-6.07433	2.02652	-2.99742	0.00272273	0.0438489	19.2029	21.004	4.54311	0	0	0
AT1G10588	0.701608	3.22203	3.98391	0.808761	0.418653	NA	0	0	0	0	4.20965	0
AT1G10590	2081.05	0.201569	0.181719	1.10923	0.267331	0.60826	1641.05	2048.98	2117.09	2008.34	2382.66	2288.19
AT1G10600	280.646	0.572145	0.298716	1.91535	0.0554479	0.279482	261.639	186.863	228.973	380.486	356.417	269.498
AT1G10610	417.107	0.106297	0.279034	0.380948	0.703242	0.902241	495.274	317.957	392.525	505.027	444.819	347.042
AT1G10620	1.74844	3.47166	3.53087	0.98323	0.325494	NA	0.80012	0	0	0	8.4193	1.27121
AT1G10630	728.455	-0.807476	0.228835	-3.52864	0.000417701	0.0115797	821.723	1149.43	810.491	569.748	498.142	521.198
AT1G10640	2.76926	-1.75524	3.31034	-0.530231	0.595952	0.854666	12.8019	0	0	0	0	3.81364
AT1G10650	294.478	-0.273406	0.327979	-0.833609	0.404501	0.734003	355.253	323.752	288.942	383.428	200.66	214.835
AT1G10652	0.769187	-1.47777	3.96617	-0.372594	0.709451	NA	0	0	3.63449	0.980634	0	0
AT1G10657	26.3665	-1.67965	1.05922	-1.58575	0.112797	0.403564	32.0048	36.2138	52.7001	27.4578	9.82251	0
AT1G10660	299.061	0.47547	0.307777	1.54485	0.122382	0.420876	225.634	281.744	243.511	424.615	376.062	242.802
AT1G10670	989.898	-0.223142	0.192682	-1.15808	0.24683	0.584649	1091.36	1098.73	1009.48	992.402	805.446	941.97
AT1G10680	0	NA	NA	NA	NA	NA	0	0	0	0	0	0
AT1G10682	7.81423	-0.619911	1.73884	-0.356509	0.72146	0.909393	4.80072	0	23.6242	2.9419	2.80643	12.7121
AT1G10690	66.8048	-0.343915	0.730731	-0.470645	0.637894	0.875271	122.418	10.8641	90.8622	45.1092	74.3704	57.2047
AT1G10700	1129.27	0.134906	0.226408	0.595852	0.551274	0.829806	800.92	1342.08	1086.71	1279.73	1090.3	1175.87
AT1G10705	0	NA	NA	NA	NA	NA	0	0	0	0	0	0
AT1G10710	1.33353	-3.58953	3.93365	-0.912519	0.361496	NA	8.0012	0	0	0	0	0
AT1G10717	0	NA	NA	NA	NA	NA	0	0	0	0	0	0
AT1G10720	820.991	0.0814566	0.253058	0.321889	0.747537	0.919922	532.08	906.794	954.962	878.648	766.156	887.308
AT1G10730	144.817	0.558208	0.502172	1.11159	0.266315	0.6073	152.023	159.341	39.9794	221.623	145.934	150.003
AT1G10740	719.307	0.000558311	0.252687	0.0022095	0.998237	0.999525	764.115	813.363	578.792	533.465	759.14	866.968
AT1G10745	0	NA	NA	NA	NA	NA	0	0	0	0	0	0
AT1G10747	0	NA	NA	NA	NA	NA	0	0	0	0	0	0
AT1G10750	0	NA	NA	NA	NA	NA	0	0	0	0	0	0
AT1G10760	1032.5	-0.102056	0.282143	-0.361718	0.717563	0.907861	1518.63	722.104	965.865	910.029	1269.91	808.493
AT1G10770	1.68981	-1.99937	3.91254	-0.511014	0.609341	NA	0	0	8.1776	1.96127	0	0
AT1G10780	20.5652	-0.237884	1.27357	-0.186785	0.851829	0.958977	28.8043	23.1768	14.538	0	50.5158	6.35607
AT1G10790	1.66581	-3.90579	3.92838	-0.994252	0.3201	NA	0	0	9.99484	0	0	0
AT1G10800	0.241426	-1.14524	4.05082	-0.282719	0.777392	NA	0	1.44855	0	0	0	0
AT1G10810	34.6879	0.463361	0.871929	0.53142	0.595128	0.854604	7.20108	26.7982	53.6087	32.3609	18.2418	69.9168
AT1G10820	309.548	0.190211	0.313598	0.606543	0.544154	0.826295	329.649	187.588	350.728	332.435	307.304	349.584
AT1G10830	269.596	0.496335	0.34566	1.4359	0.15103	0.466688	151.223	240.46	279.856	356.951	221.708	367.381
AT1G10840	1105.67	-0.0537364	0.204535	-0.262725	0.792762	0.937898	929.739	1322.53	1126.69	1137.54	1010.32	1107.23
AT1G10850	68.9212	0.0532229	0.708585	0.0751115	0.940126	0.986774	122.418	58.6664	21.8069	88.2571	98.2251	24.1531
AT1G10865	508.756	-0.105712	0.249993	-0.42286	0.672397	0.888825	564.885	438.187	578.792	453.053	587.947	429.671
AT1G10870	222.593	-0.240337	0.352597	-0.681621	0.495479	0.798368	292.844	204.97	225.338	167.688	159.967	284.752
AT1G10880	0	NA	NA	NA	NA	NA	0	0	0	0	0	0
AT1G10890	4165.81	0.0708143	0.167618	0.422475	0.672679	0.888825	4435.06	3613.42	4141.5	3828.4	4734.45	4242.04
AT1G10900	1581.19	0.295536	0.208603	1.41674	0.156559	0.474815	1433.81	1362.36	1462.88	1736.7	2155.34	1336.05
AT1G10910	882.658	-0.257904	0.225445	-1.14398	0.252633	0.592492	984.948	994.432	904.987	924.738	886.832	600.013
AT1G10920	798.311	0.413038	0.232135	1.7793	0.0751899	0.326432	793.719	583.043	676.923	735.476	1079.07	921.631
AT1G10930	58.3263	0.0982693	0.587343	0.167312	0.867125	0.963874	72.8109	62.2878	33.619	50.0123	84.193	47.0349
AT1G10940	2920.82	0.0350987	0.188786	0.185919	0.852509	0.959472	3142.87	3033.27	2478.72	2862.47	3498.22	2509.38
AT1G10950	758.416	0.193236	0.208756	0.925652	0.354627	0.69278	682.502	783.667	656.025	714.882	862.978	850.443
AT1G10960	1126.75	-0.515704	0.262692	-1.96315	0.049629	0.263139	1083.36	1557.19	1336.58	870.803	1276.93	635.607
AT1G10970	36.8298	-0.278483	0.771909	-0.360773	0.71827	0.907975	16.0024	65.1849	39.9794	44.1285	37.8868	17.797
AT1G10980	0.513575	-2.21662	3.976	-0.5575	0.577186	NA	0	2.17283	0.908622	0	0	0
AT1G10990	27.3849	-0.05608	1.01031	-0.0555075	0.955734	0.990249	16.8025	18.8312	48.157	12.7482	4.20965	63.5607
AT1G11000	217.135	0.270983	0.386631	0.700883	0.483376	0.791563	289.643	175.999	124.481	200.049	206.273	306.363
AT1G11010	0	NA	NA	NA	NA	NA	0	0	0	0	0	0
AT1G11020	275.337	0.196154	0.2879	0.681327	0.495665	0.798368	225.634	303.472	240.785	315.764	304.498	261.87
AT1G11030	0	NA	NA	NA	NA	NA	0	0	0	0	0	0
AT1G11040	0	NA	NA	NA	NA	NA	0	0	0	0	0	0
AT1G11050	538.367	-0.116051	0.24286	-0.477854	0.632754	0.872662	644.097	546.829	489.747	591.322	429.384	528.825
AT1G11055	0	NA	NA	NA	NA	NA	0	0	0	0	0	0
AT1G11060	211.369	0.615771	0.370782	1.66074	0.0967665	0.373017	242.436	148.477	109.943	290.268	220.305	256.785
AT1G11070	25.9124	-0.259284	1.15356	-0.22477	0.822158	0.949413	0.80012	70.9791	12.7207	12.7482	37.8868	20.3394
AT1G11080	9.96118	-2.75783	2.13262	-1.29317	0.195954	0.52826	52.0078	0	0	0	1.40322	6.35607
AT1G11090	168.062	-0.107654	0.339744	-0.316869	0.751343	0.921155	194.429	180.345	148.105	166.708	172.596	146.19
AT1G11100	9.94422	0.714573	1.34866	0.52984	0.596223	0.854666	11.2017	5.06994	6.36035	12.7482	1.40322	22.8819
AT1G11110	0.266707	-1.26943	4.03914	-0.314283	0.753306	NA	1.60024	0	0	0	0	0
AT1G11112	1.9314	-4.12652	3.92532	-1.05126	0.29314	NA	0	11.5884	0	0	0	0
AT1G11120	10.6438	-0.983329	1.73356	-0.567232	0.570557	0.840519	28.8043	0	13.6293	4.90317	0	16.5258
AT1G11125	2.60429	-1.63378	3.3847	-0.482696	0.629312	0.871138	0	0	11.8121	0	0	3.81364
AT1G11130	61.2187	-0.317788	0.531719	-0.597661	0.550066	0.829051	73.611	70.9791	59.0604	52.9542	68.7576	41.9501
AT1G11145	0	NA	NA	NA	NA	NA	0	0	0	0	0	0
AT1G11150.1	115.042	0.227951	0.413632	0.551096	0.581568	0.846673	114.417	110.814	92.6794	140.231	143.128	88.985
AT1G11160	2.35422	-0.836796	2.76131	-0.303044	0.761857	NA	1.60024	2.89711	4.54311	0	0	5.08486
AT1G11170	20.0766	-0.563613	1.25733	-0.448263	0.653964	0.882635	40.006	0	31.8018	9.80634	21.0482	17.797
AT1G11175	731.748	0.0312026	0.266751	0.116973	0.906882	0.975947	729.709	631.569	809.582	505.027	726.866	987.734
AT1G11180	663.892	0.519955	0.270745	1.92046	0.0547992	0.27794	524.079	420.805	691.461	569.748	906.478	870.782
AT1G11185	0.467739	2.62903	4.02248	0.653585	0.513379	NA	0	0	0	0	2.80643	0
AT1G11190	4.24024	-5.25522	3.16804	-1.65882	0.0971516	0.373588	0	0	25.4414	0	0	0
AT1G11200	571.629	-0.07069	0.299794	-0.235795	0.813591	0.945956	571.286	527.998	658.751	789.411	541.641	340.686
AT1G11210	2351.09	-0.379722	0.283689	-1.33852	0.180729	0.50777	2237.94	2876.1	2862.16	1682.77	1239.04	3208.55
AT1G11220	4.81046	-5.43877	2.31691	-2.34742	0.0189037	0.150012	4.0006	9.41559	15.4466	0	0	0
AT1G11230	0	NA	NA	NA	NA	NA	0	0	0	0	0	0
AT1G11240	199.965	-0.35118	0.346449	-1.01366	0.310747	0.650679	210.432	244.805	217.161	186.321	220.305	120.765
AT1G11250	0	NA	NA	NA	NA	NA	0	0	0	0	0	0
AT1G11260	11032.7	1.17683	0.221603	5.31051	1.09e-07	1.73e-05	5107.97	7274.63	7917.73	11463.6	14812.3	19619.9
AT1G11265.1	3.43806	-1.88194	2.20726	-0.852617	0.393872	0.725272	1.60024	10.1399	4.54311	2.9419	1.40322	0
AT1G11270	227.435	-0.375166	0.32011	-1.17199	0.241201	0.579282	233.635	221.629	315.292	196.127	230.127	167.8
AT1G11280	172.316	0.00780996	0.333156	0.0234423	0.981297	0.996172	193.629	174.551	147.197	167.688	175.402	175.428
AT1G11290	47.4577	0.157317	0.674391	0.233272	0.81555	0.946846	60.009	21.004	53.6087	48.0511	71.564	30.5092
AT1G11300	121.112	-0.685109	0.468565	-1.46214	0.143702	0.45508	207.231	137.613	102.674	56.8768	92.6123	129.664
AT1G11310	3547.91	-0.264236	0.247257	-1.06867	0.285219	0.62564	5008.75	3403.38	3202.89	3143.91	4306.47	2222.08
AT1G11320	24.516	-0.0896951	1.17801	-0.0761413	0.939307	0.986702	61.6092	0.724277	13.6293	41.1866	21.0482	8.8985
AT1G11330	680.181	-0.688141	0.208195	-3.30527	0.000948858	0.0214042	878.532	879.272	760.517	534.446	485.513	542.809
AT1G11340	39.2992	-0.603352	0.943407	-0.639546	0.522468	0.815113	12.0018	53.5965	76.3242	2.9419	47.7093	43.2213
AT1G11350	480.644	0.155821	0.316801	0.491857	0.62282	0.869077	483.272	413.562	467.032	357.931	380.272	781.797
AT1G11360	338.065	-0.230707	0.3141	-0.734503	0.462642	0.777114	293.644	312.887	488.839	279.481	258.192	395.348
AT1G11362	18.6839	2.21616	1.47309	1.50443	0.132472	0.434945	0	0	19.9897	13.7289	22.4515	55.9334
AT1G11370	0.163439	1.53911	4.08047	0.377189	0.706033	NA	0	0	0	0.980634	0	0
AT1G11380	655.17	1.99469	0.38504	5.18047	2.21e-07	3.26e-05	92.8139	314.336	381.621	953.176	851.752	1337.32
AT1G11390	163.13	0.728834	0.356743	2.04302	0.0410502	0.237389	132.02	118.781	117.212	154.94	210.482	245.344
AT1G11400	247.155	0.0643022	0.337629	0.190452	0.848955	0.957836	311.247	209.316	204.44	240.255	192.241	325.431
AT1G11410	493.754	0.201866	0.290617	0.694612	0.487298	0.793668	620.093	348.377	408.88	467.763	662.318	455.095
AT1G11420	0	NA	NA	NA	NA	NA	0	0	0	0	0	0
AT1G11430	811.5	0.215406	0.216878	0.993212	0.320606	0.65901	688.903	767.733	796.861	973.77	938.751	702.982
AT1G11440	415.975	0.246616	0.309923	0.795734	0.426187	0.751531	346.452	302.748	493.382	601.129	427.981	324.16
AT1G11450	0	NA	NA	NA	NA	NA	0	0	0	0	0	0
AT1G11460	3.19153	-4.84849	2.70187	-1.7945	0.0727342	0.320808	12.8019	3.62138	2.72587	0	0	0
AT1G11470	1.12007	1.47201	3.91486	0.376005	0.706914	NA	0	0	1.81724	4.90317	0	0
AT1G11475	459.68	0.0253176	0.279313	0.0906424	0.927777	0.983365	611.292	338.961	417.057	506.988	449.029	434.755
AT1G11480	682.74	0.1938	0.226165	0.856895	0.391503	0.723062	689.703	512.788	708.725	702.134	684.769	798.323
AT1G11482	9.46992	-2.80627	1.77808	-1.57826	0.114507	0.407043	41.6062	2.89711	5.45173	6.86444	0	0
AT1G11490	0	NA	NA	NA	NA	NA	0	0	0	0	0	0
AT1G11500	0	NA	NA	NA	NA	NA	0	0	0	0	0	0
AT1G11510	0	NA	NA	NA	NA	NA	0	0	0	0	0	0
AT1G11520	0	NA	NA	NA	NA	NA	0	0	0	0	0	0
AT1G11530	992.344	-0.0921917	0.231709	-0.397877	0.690721	0.896053	940.941	1213.16	916.8	854.132	1217.99	811.035
AT1G11540	12.1347	1.3692	1.41097	0.970395	0.33185	0.67125	0	13.037	7.26898	17.6514	5.61286	29.2379
AT1G11545	72.4657	0.391034	0.810696	0.482343	0.629562	0.871157	84.0126	94.8802	9.08622	61.78	21.0482	163.987
AT1G11550	0	NA	NA	NA	NA	NA	0	0	0	0	0	0
AT1G11560	0	NA	NA	NA	NA	NA	0	0	0	0	0	0
AT1G11570	0	NA	NA	NA	NA	NA	0	0	0	0	0	0
AT1G11572	5.07992	-0.725483	2.18025	-0.332752	0.739322	0.916065	1.60024	17.3826	0	5.88381	5.61286	0
AT1G11580	10.1493	2.21885	1.69003	1.31291	0.189215	0.518005	0	0	10.9035	27.4578	9.82251	12.7121
AT1G11590	3.08831	-1.40541	2.89623	-0.485254	0.627496	0.870479	0	0.724277	12.7207	0	0	5.08486
AT1G11592	126.988	-0.260218	0.429326	-0.606109	0.544442	0.826295	160.824	127.473	127.207	122.579	68.7576	155.088
AT1G11593	0	NA	NA	NA	NA	NA	0	0	0	0	0	0
AT1G11595	0	NA	NA	NA	NA	NA	0	0	0	0	0	0
AT1G11600	0	NA	NA	NA	NA	NA	0	0	0	0	0	0
AT1G11608	0.847476	3.50797	3.97017	0.883582	0.376922	NA	0	0	0	0	0	5.08486
AT1G11610	0	NA	NA	NA	NA	NA	0	0	0	0	0	0
AT1G11620	0	NA	NA	NA	NA	NA	0	0	0	0	0	0
AT1G11630	73.5771	-0.0822825	0.59585	-0.138093	0.890167	0.970203	35.2053	63.7363	128.116	51.9736	64.5479	97.8835
AT1G11640	0	NA	NA	NA	NA	NA	0	0	0	0	0	0
AT1G11650	1759.02	0.283511	0.174024	1.62915	0.103281	0.386507	1608.24	1409.44	1742.74	1849.48	1942.05	2002.16
AT1G11655	0.151437	-0.384446	4.08047	-0.0942159	0.924938	NA	0	0	0.908622	0	0	0
AT1G11660	216.649	-0.416875	0.309819	-1.34555	0.178449	0.505954	234.435	285.365	223.521	204.953	183.821	167.8
AT1G11670	3000.16	-0.611952	0.169422	-3.61201	0.000303835	0.0093045	4131.82	3405.55	3344.64	2528.08	2194.63	2396.24
AT1G11680	827.683	-0.172569	0.246978	-0.698723	0.484725	0.79241	772.116	868.408	991.307	752.146	575.319	1006.8
AT1G11684	0	NA	NA	NA	NA	NA	0	0	0	0	0	0
AT1G11690	0	NA	NA	NA	NA	NA	0	0	0	0	0	0
AT1G11700	64.8414	-0.23148	0.596656	-0.387961	0.698045	0.899558	45.6068	105.744	59.0604	92.1796	40.6933	45.7637
AT1G11710	34.4359	-0.769223	0.696896	-1.10378	0.269687	0.610707	48.8073	48.5265	32.7104	22.5546	33.6772	20.3394
AT1G11720	1492.01	-0.178649	0.211849	-0.843287	0.399068	0.729035	1786.67	1411.61	1553.74	1297.38	1748.41	1154.26
AT1G11730	5.89189	6.30587	2.50033	2.52202	0.0116683	0.113214	0	0	0	5.88381	29.4675	0
AT1G11735	2.54438	-0.43381	3.03591	-0.142893	0.886375	0.969416	8.80132	0	0	3.92254	0	2.54243
AT1G11740	3.8206	-3.33384	2.64729	-1.25934	0.207907	0.541257	7.20108	13.7613	0	1.96127	0	0
AT1G11750	1166.88	-0.276691	0.181233	-1.52672	0.126831	0.426802	1194.58	1257.34	1383.83	1073.79	1006.11	1085.62
AT1G11755	109.588	0.967172	0.419124	2.3076	0.0210213	0.159775	68.8103	78.9461	74.507	106.889	152.951	175.428
AT1G11760	250.462	0.145793	0.356596	0.408847	0.682652	0.892504	155.223	260.015	298.028	246.139	343.788	199.581
AT1G11765	0	NA	NA	NA	NA	NA	0	0	0	0	0	0
AT1G11770	7.66922	5.70362	1.96592	2.90125	0.00371672	0.0534887	0.80012	0	0	11.7676	4.20965	29.2379
AT1G11780	404.874	0.110853	0.252045	0.439812	0.660073	0.885251	346.452	422.253	398.885	368.718	411.142	481.79
AT1G11785	22.4083	-0.426408	0.856116	-0.498073	0.618432	0.866167	18.4028	26.7982	31.8018	16.6708	28.0643	12.7121
AT1G11790	231.312	-0.122852	0.301923	-0.406898	0.684083	0.89283	252.838	259.291	210.8	191.224	238.547	235.175
AT1G11800	114.263	-0.171667	0.416711	-0.411956	0.680372	0.891732	151.223	123.851	88.1363	119.637	101.032	101.697
AT1G11803	0	NA	NA	NA	NA	NA	0	0	0	0	0	0
AT1G11806	0.211869	1.53911	4.08047	0.377189	0.706033	NA	0	0	0	0	0	1.27121
AT1G11810	0	NA	NA	NA	NA	NA	0	0	0	0	0	0
AT1G11820	416.65	0.798559	0.295105	2.70601	0.00680961	0.0806021	206.431	312.163	394.342	513.852	461.658	611.454
AT1G11840	1207.92	0.0111543	0.181205	0.0615562	0.950916	0.989283	1140.97	1161.02	1307.51	1136.56	1267.1	1234.35
AT1G11850	0.454311	-2.02114	3.98595	-0.507066	0.612109	NA	0	0	2.72587	0	0	0
AT1G11860	5594.24	-0.0847665	0.200561	-0.422647	0.672553	0.888825	4744.71	6746.64	5784.29	5985.79	6116.62	4187.38
AT1G11870	206.031	-0.296182	0.324174	-0.913652	0.360899	0.697829	203.23	281.744	196.262	189.262	171.192	194.496
AT1G11880	116.04	0.109091	0.419167	0.260257	0.794666	0.938839	122.418	136.164	76.3242	132.386	109.451	119.494
AT1G11890	833.164	-0.0504041	0.203254	-0.247985	0.804146	0.943159	850.528	952.424	739.618	785.488	816.672	854.256
AT1G11900	78.4889	0.252888	0.551733	0.458353	0.646699	0.879317	32.8049	110.09	71.7811	74.5282	94.0155	87.7138
AT1G11905	107.932	-0.51726	0.542948	-0.952688	0.340748	0.679713	46.407	202.797	131.75	68.6444	91.209	106.782
AT1G11910	2607.11	-0.279908	0.172264	-1.62488	0.104188	0.388453	2720.41	2769.63	3087.5	2163.28	2203.05	2698.79
AT1G11915	0	NA	NA	NA	NA	NA	0	0	0	0	0	0
AT1G11920	0	NA	NA	NA	NA	NA	0	0	0	0	0	0
AT1G11925	0	NA	NA	NA	NA	NA	0	0	0	0	0	0
AT1G11930	1598.68	-0.139174	0.201414	-0.690988	0.489573	0.79507	1991.5	1567.33	1467.42	1401.33	1775.07	1389.44
AT1G11940	63.8223	-0.221039	0.624793	-0.35378	0.723504	0.909953	65.6098	112.263	28.1673	63.7412	40.6933	72.4592
AT1G11950	85.4132	-0.456775	0.599277	-0.76221	0.445935	0.764724	48.0072	175.275	72.6898	38.2447	84.193	94.0699
AT1G11960	2004.63	0.533746	0.180678	2.95413	0.00313553	0.0481819	1459.42	1884.57	1570.1	2593.78	2291.45	2228.44
AT1G11970	0.120713	-0.384446	4.08047	-0.0942159	0.924938	NA	0	0.724277	0	0	0	0
AT1G11980	0.266707	-1.26943	4.03914	-0.314283	0.753306	NA	1.60024	0	0	0	0	0
AT1G11990	10.316	-5.55804	2.23479	-2.48705	NA	NA	0.80012	60.115	0	0.980634	0	0
AT1G12000	492.673	0.00726323	0.256091	0.0283619	0.977374	0.995272	503.275	580.87	389.799	473.646	436.4	572.047
AT1G12010	4.58536	-1.2052	2.45757	-0.490405	0.623847	0.869704	10.4016	8.69132	0	0	8.4193	0
AT1G12013	3.72125	-5.06998	2.99715	-1.6916	0.0907223	0.3599	21.6032	0.724277	0	0	0	0
AT1G12015	0.266707	-1.26943	4.03914	-0.314283	0.753306	NA	1.60024	0	0	0	0	0
AT1G12020	129.335	-0.673844	0.550178	-1.22478	0.22066	0.555801	94.4142	314.336	68.1466	115.715	98.2251	85.1714
AT1G12030	38.7091	-0.120229	0.833645	-0.144221	0.885326	0.969086	77.6116	21.7283	21.8069	61.78	37.8868	11.4409
AT1G12040	0	NA	NA	NA	NA	NA	0	0	0	0	0	0
AT1G12050	429.024	0.215178	0.275716	0.780433	0.435136	0.757426	425.664	296.229	469.758	434.421	402.723	545.351
AT1G12060	134.037	-0.935052	0.467933	-1.99826	0.0456884	0.251137	124.819	240.46	163.552	145.134	60.3383	69.9168
AT1G12064	0	NA	NA	NA	NA	NA	0	0	0	0	0	0
AT1G12070	0	NA	NA	NA	NA	NA	0	0	0	0	0	0
AT1G12080	20.3799	-4.10524	1.47952	-2.77471	0.00552505	0.0708936	73.611	39.8352	1.81724	0	7.01608	0
AT1G12090	4766.23	-0.452557	0.207789	-2.17797	0.0294084	0.196158	5085.56	5336.47	6102.3	4901.21	4320.5	2851.33
AT1G12100	1.70181	-1.26883	3.86656	-0.328155	0.742794	NA	0	0	7.26898	2.9419	0	0
AT1G12110	214.671	-0.227333	0.394613	-0.57609	0.564554	0.837255	303.245	131.818	259.866	225.546	231.531	136.02
AT1G12120	672.347	-0.185119	0.225245	-0.821855	0.41116	0.739329	624.094	766.285	755.065	553.078	738.092	597.471
AT1G12130	11.3696	-0.502464	1.44878	-0.346819	0.728728	0.912328	3.20048	15.9341	20.8983	7.84507	0	20.3394
AT1G12140	353.832	0.387921	0.293833	1.32021	0.186765	0.515084	317.648	213.662	388.89	419.711	405.529	377.551
AT1G12150	113.632	0.309814	0.459323	0.674501	0.499993	0.800995	128.019	90.5346	85.4105	71.5863	147.338	158.902
AT1G12160	1.1925	4.01568	3.95148	1.01625	0.309512	NA	0	0	0	5.88381	0	1.27121
AT1G12170	0	NA	NA	NA	NA	NA	0	0	0	0	0	0
AT1G12180	0	NA	NA	NA	NA	NA	0	0	0	0	0	0
AT1G12190	0	NA	NA	NA	NA	NA	0	0	0	0	0	0
AT1G12200	5.53233	-0.938311	1.92703	-0.48692	0.626315	0.870479	13.602	0	8.1776	0.980634	2.80643	7.62729
AT1G12210	25.4223	0.467178	0.93274	0.500865	0.616466	0.865669	26.404	5.79421	31.8018	11.7676	32.274	44.4925
AT1G12211	2.91736	-0.0220174	2.07277	-0.0106222	0.991525	0.998413	4.80072	2.17283	1.81724	1.96127	4.20965	2.54243
AT1G12220	197.764	-0.970694	0.393776	-2.46509	0.0136979	0.12381	308.846	311.439	165.369	155.921	158.563	86.4426
AT1G12230	1043.8	0.0824402	0.209826	0.392897	0.694395	0.89816	801.72	1116.83	1123.06	995.344	1121.17	1104.69
AT1G12240	8440.47	0.772056	0.240766	3.20666	0.00134284	0.027099	6140.12	6761.12	5800.64	8248.11	15836.7	7856.11
AT1G12244	368.587	-0.076583	0.366583	-0.208911	0.834518	0.954309	334.45	455.57	344.368	316.745	569.706	190.682
AT1G12250	1494.83	0.241907	0.243375	0.993969	0.320238	0.658775	1480.22	1221.13	1407.46	1506.25	2221.29	1132.65
AT1G12260	1.16935	3.96581	3.95304	1.00323	0.31575	NA	0	0	0	0	7.01608	0
AT1G12270	566.175	-0.154881	0.23877	-0.648665	0.516555	0.811067	484.073	663.437	641.487	466.782	578.125	563.148
AT1G12280	121.516	-0.373083	0.407035	-0.916586	0.359359	0.6966	109.616	181.793	119.938	110.812	105.241	101.697
AT1G12290	135.056	-0.17585	0.423512	-0.415218	0.677982	0.890887	209.631	110.09	109.943	108.85	119.273	152.546
AT1G12294	0	NA	NA	NA	NA	NA	0	0	0	0	0	0
AT1G12300	59.1673	-0.172124	0.821323	-0.20957	0.834004	0.954046	55.2083	125.3	7.26898	48.0511	91.209	27.9667
AT1G12310	556.685	-0.473505	0.288051	-1.64382	0.100213	0.380596	404.061	866.959	670.563	469.724	454.642	474.163
AT1G12320	16.8939	-0.810322	1.35352	-0.598676	0.549389	0.828626	39.2059	0	25.4414	14.7095	4.20965	17.797
AT1G12330	106.251	-0.319056	0.450035	-0.708958	0.47835	0.787999	111.217	162.238	79.9587	79.4314	108.048	96.6123
AT1G12340	1.66581	-3.90579	3.92838	-0.994252	0.3201	NA	0	0	9.99484	0	0	0
AT1G12350	946.25	0.206659	0.19712	1.04839	0.294458	0.634282	976.146	898.103	761.425	1053.2	1004.7	983.92
AT1G12360	1356.2	-0.076577	0.210272	-0.364181	0.715723	0.907092	1241.79	1696.26	1238.45	1341.51	1126.78	1492.41
AT1G12370	57.2589	0.0462095	0.764935	0.0604097	0.951829	0.989533	22.4034	64.4606	82.6846	122.579	19.645	31.7804
AT1G12380	10.5296	-0.887162	1.65266	-0.536809	0.5914	0.852473	17.6026	1.44855	21.8069	0	21.0482	1.27121
AT1G12390	412.79	0.464682	0.263911	1.76076	0.0782799	0.332717	430.465	316.509	293.485	452.072	449.029	535.181
AT1G12400	347.912	-0.531388	0.258906	-2.05244	0.0401272	0.234632	400.06	391.834	441.59	250.062	284.853	319.075
AT1G12410	1086.26	-0.227155	0.232419	-0.977348	0.328397	0.668027	1036.96	977.773	1501.04	1131.65	1042.59	827.561
AT1G12411	2.1194	0.0022881	3.6215	0.000631811	0.999496	NA	0	0	6.36035	0	0	6.35607
AT1G12420	93.6447	0.0655276	0.54081	0.121166	0.90356	0.974807	46.407	70.9791	157.192	76.4895	119.273	91.5275
AT1G12423	0	NA	NA	NA	NA	NA	0	0	0	0	0	0
AT1G12430	105.322	0.294034	0.444186	0.661963	0.507995	0.806066	123.218	73.1519	87.2277	88.2571	143.128	116.952
AT1G12440	1582.78	0.18989	0.176281	1.0772	0.281391	0.622247	1447.42	1384.82	1603.72	1529.79	1751.21	1779.7
AT1G12450	245.206	1.3994	0.40469	3.45795	0.000544298	0.0140022	102.415	114.436	188.085	377.544	186.628	502.13
AT1G12451	0	NA	NA	NA	NA	NA	0	0	0	0	0	0
AT1G12460	49.8226	0.853926	0.609977	1.39993	0.161534	0.481857	32.0048	31.8682	42.7052	75.5088	79.9833	36.8652
AT1G12470	229.826	0.757174	0.332797	2.27518	0.0228951	0.168226	214.432	116.609	181.724	274.578	289.062	302.549
AT1G12480	15.7279	1.10755	1.44647	0.765697	0.443857	0.763602	0.80012	28.9711	0	11.7676	21.0482	31.7804
AT1G12490	0.935477	3.64129	3.96462	0.918445	0.358386	NA	0	0	0	0	5.61286	0
AT1G12500	999.242	0.113173	0.197805	0.572142	0.567226	0.838084	969.745	1027.02	883.181	993.382	937.348	1184.77
AT1G12510	1.4838	-1.32482	3.89131	-0.340456	0.733513	NA	0	0	6.36035	0	0	2.54243
AT1G12520	2170.5	0.0809023	0.160341	0.504564	0.613865	0.864482	2129.12	2001.9	2197.96	2154.45	2203.05	2336.49
AT1G12530	232.488	-0.561271	0.357046	-1.57198	0.115954	0.40929	365.655	178.172	288.033	198.088	150.144	214.835
AT1G12540	0	NA	NA	NA	NA	NA	0	0	0	0	0	0
AT1G12550	333.112	0.166836	0.302732	0.5511	0.581565	0.846673	409.661	235.39	296.211	294.19	397.11	366.11
AT1G12560	1.59108	-0.517746	3.63399	-0.142473	0.886706	NA	5.60084	0	0	0	1.40322	2.54243
AT1G12570	1.83309	2.01775	3.79743	0.531347	0.595179	NA	0	2.17283	0	8.82571	0	0
AT1G12580	2316.84	0.066582	0.190013	0.350408	0.726032	0.911336	2194.73	2364.76	2230.67	2563.38	2692.77	1854.7
AT1G12590	5.17469	0.193291	1.88243	0.102682	0.918216	0.979612	7.20108	0	7.26898	2.9419	9.82251	3.81364
AT1G12600	27.5082	-0.949413	0.819679	-1.15827	0.246752	0.584597	54.4082	24.6254	29.9845	29.419	12.6289	13.9834
AT1G12610	4039.78	0.0654385	0.213348	0.306722	0.759055	0.923036	3059.66	5315.47	3469.12	4447.18	4131.07	3816.19
AT1G12620	120.397	0.0236934	0.405411	0.0584428	0.953396	0.989756	105.616	111.539	140.836	101.986	154.354	108.053
AT1G12630	1.2115	-3.44487	3.93648	-0.875114	0.381512	NA	0	0	7.26898	0	0	0
AT1G12640	486.111	0.426463	0.269782	1.58077	0.113931	0.405865	388.858	529.446	325.287	537.388	653.899	481.79
AT1G12650	296.138	0.0690375	0.337052	0.204828	0.837707	0.955016	362.454	232.493	271.678	255.946	427.981	226.276
AT1G12660	1.48497	-3.74413	3.93093	-0.95248	0.340853	NA	8.0012	0	0.908622	0	0	0
AT1G12663	0	NA	NA	NA	NA	NA	0	0	0	0	0	0
AT1G12665	0	NA	NA	NA	NA	NA	0	0	0	0	0	0
AT1G12667	0	NA	NA	NA	NA	NA	0	0	0	0	0	0
AT1G12669	0	NA	NA	NA	NA	NA	0	0	0	0	0	0
AT1G12670	0	NA	NA	NA	NA	NA	0	0	0	0	0	0
AT1G12672	0.739101	-2.73032	3.9554	-0.690277	0.49002	NA	0.80012	0	3.63449	0	0	0
AT1G12680	381.351	0.173134	0.280049	0.618228	0.536425	0.82178	288.043	324.476	463.397	425.595	429.384	357.211
AT1G12700	73.9316	1.30619	0.581294	2.24705	0.024637	0.175853	33.605	73.8762	19.9897	123.56	101.032	91.5275
AT1G12710	197.628	1.36167	0.394399	3.45251	0.000555401	0.0142011	88.8133	87.6375	156.283	310.861	182.418	359.754
AT1G12720.1	0	NA	NA	NA	NA	NA	0	0	0	0	0	0
AT1G12725.1	0	NA	NA	NA	NA	NA	0	0	0	0	0	0
AT1G12730	209.818	0.422548	0.315094	1.34102	0.179914	0.507066	181.627	148.477	208.074	235.352	227.321	258.057
AT1G12740	3.0551	-4.78367	3.08501	-1.55062	0.120994	0.418541	0	6.51849	11.8121	0	0	0
AT1G12750	686.138	-0.688743	0.258582	-2.66353	0.00773247	0.0873479	776.916	692.408	1072.17	613.877	558.48	402.975
AT1G12760	1267.08	0.0733471	0.200621	0.3656	0.714664	0.906688	1063.36	1244.31	1396.55	1215.99	1500.04	1182.23
AT1G12770	290.598	0.17182	0.301438	0.57	0.568677	0.839156	286.443	265.809	267.135	270.655	406.933	246.616
AT1G12775	91.3757	0.370746	0.481919	0.769312	0.441708	0.762066	96.0144	50.6994	92.6794	124.541	108.048	76.2729
AT1G12780	1382.64	0.451427	0.180936	2.49495	0.0125974	0.117872	1042.56	1200.13	1262.08	1705.32	1573.01	1512.75
AT1G12790	113.609	0.220588	0.510123	0.432421	0.665435	0.886808	43.2065	123.851	148.105	152.979	94.0155	119.494
AT1G12800	670.123	-0.341427	0.208502	-1.63752	0.101521	0.382501	723.308	725.001	798.679	581.516	646.883	545.351
AT1G12805	0	NA	NA	NA	NA	NA	0	0	0	0	0	0
AT1G12810	270.386	-0.000266027	0.276958	-0.000960532	0.999234	0.999866	292.044	252.773	266.226	249.081	273.627	288.566
AT1G12820	681.871	-0.136846	0.256343	-0.533839	0.593453	0.853444	622.493	842.334	678.741	815.888	477.093	654.676
AT1G12830	323.656	-0.0870733	0.294966	-0.295198	0.767843	0.926708	316.047	263.637	420.692	305.958	364.836	270.769
AT1G12840	1684.15	-0.0656948	0.207257	-0.316973	0.751264	0.921112	1674.65	2083.02	1410.18	1872.03	1420.05	1644.95
AT1G12845	35.6292	-0.376439	0.835627	-0.450487	0.652359	0.881655	34.4052	10.8641	75.4156	16.6708	42.0965	34.3228
AT1G12850	360.809	-0.13242	0.284127	-0.466058	0.641174	0.876946	274.441	445.43	412.514	380.486	322.74	329.245
AT1G12855	0.635607	3.09156	3.99113	0.77461	0.43857	NA	0	0	0	0	0	3.81364
AT1G12860	336.496	0.11258	0.28592	0.393748	0.693767	0.897781	307.246	384.591	278.038	374.602	399.917	274.582
AT1G12870	2.97565	4.29157	2.89686	1.48146	0.138485	0.446547	0.80012	0	0	0	5.61286	11.4409
AT1G12880	73.4491	-0.958412	0.5415	-1.76992	0.0767402	0.330161	136.821	76.049	78.1415	46.0898	33.6772	69.9168
AT1G12890	5.95334	4.29071	1.98934	2.15685	0.0310175	0.201863	0	0	1.81724	8.82571	9.82251	15.2546
AT1G12900	5763.63	0.125654	0.193805	0.648352	0.516757	0.811172	4727.11	6243.99	5567.13	6467.28	6924.87	4651.37
AT1G12910	820.113	0.0939817	0.23142	0.406108	0.684663	0.893255	626.494	1000.23	753.248	841.384	794.22	905.105
AT1G12920	879.001	0.0459753	0.193594	0.237483	0.812282	0.945696	827.324	915.486	852.287	898.261	820.881	959.767
AT1G12930	339.575	0.350383	0.276154	1.2688	0.204514	0.536734	288.043	243.357	364.357	354.009	413.949	373.737
AT1G12935.1	0	NA	NA	NA	NA	NA	0	0	0	0	0	0
AT1G12938	0.80012	-2.85293	3.95146	-0.721993	0.470299	NA	4.80072	0	0	0	0	0
AT1G12940	0	NA	NA	NA	NA	NA	0	0	0	0	0	0
AT1G12950	0	NA	NA	NA	NA	NA	0	0	0	0	0	0
AT1G12960	0	NA	NA	NA	NA	NA	0	0	0	0	0	0
AT1G12970	497.46	0.0991109	0.327947	0.302217	0.762487	0.92407	277.642	567.109	596.056	383.428	485.513	675.015
AT1G12980	0	NA	NA	NA	NA	NA	0	0	0	0	0	0
AT1G12990	850.614	0.72222	0.219861	3.28489	0.00102021	0.0226023	652.898	630.121	643.304	1024.76	855.962	1296.64
AT1G13000	363.767	-0.218095	0.254065	-0.858424	0.390658	0.722774	407.261	399.801	366.175	301.055	326.949	381.364
AT1G13010	0.326878	2.19337	4.06059	0.540159	0.589087	NA	0	0	0	1.96127	0	0
AT1G13020	150.429	0.76527	0.408802	1.87198	0.0612092	0.292563	68.8103	156.444	109.035	205.933	162.773	199.581
AT1G13030	63.9483	-0.201064	0.537705	-0.37393	0.708457	0.904506	77.6116	84.7404	42.7052	59.8187	60.3383	58.4759
AT1G13040	17.8311	0.457988	1.04029	0.440249	0.659757	0.885128	16.8025	2.89711	25.4414	17.6514	23.8547	20.3394
AT1G13050	84.2274	-0.108612	0.502949	-0.21595	0.829027	0.952075	115.217	94.1559	52.7001	88.2571	94.0155	61.0183
AT1G13060	598.84	0.741186	0.263918	2.8084	0.00497889	0.0658921	359.254	566.384	418.875	782.546	881.22	584.759
AT1G13070	1.58923	4.41892	3.93564	1.1228	0.261524	NA	0	0	0	3.92254	5.61286	0
AT1G13080	353.322	-0.324109	0.314981	-1.02898	0.303488	0.643512	540.881	325.2	312.566	353.028	347.998	240.26
AT1G13090	894.083	0.118955	0.218361	0.544761	0.585918	0.849101	1012.15	756.869	802.313	899.242	1079.07	814.849
AT1G13100	489.817	-0.249014	0.287129	-0.867258	0.385801	0.718758	600.09	401.249	594.239	334.396	427.981	580.945
AT1G13110	3399.37	0.081978	0.229124	0.357789	0.720501	0.908997	3959.79	2550.18	3398.25	2811.48	3050.59	4625.95
AT1G13120	423.266	0.0616773	0.311069	0.198275	0.84283	0.956109	504.876	241.184	497.016	425.595	406.933	463.993
AT1G13130	0	NA	NA	NA	NA	NA	0	0	0	0	0	0
AT1G13140	25.083	0.0228293	2.60225	0.00877292	0.993	0.999	0	74.6005	0	10.787	43.4997	21.6106
AT1G13145	80.7522	-1.19549	0.549969	-2.17375	0.0297241	0.197367	85.6128	168.032	83.5932	58.8381	61.7415	26.6955
AT1G13150	156.399	0.403082	0.381372	1.05693	0.290545	0.630301	91.2137	159.341	153.557	172.592	155.757	205.937
AT1G13160	143.547	0.219404	0.400426	0.547926	0.583743	0.847672	160.024	154.271	83.5932	169.65	136.112	157.631
AT1G13170	43.0434	-0.149515	0.704466	-0.212239	0.831921	0.953113	78.4118	21.004	36.3449	32.3609	39.29	50.8486
AT1G13180	156.239	0.197323	0.389212	0.506979	0.612169	0.863344	183.227	115.884	138.111	206.914	117.87	175.428
AT1G13190	549.147	0.515643	0.239932	2.14912	0.0316249	0.204247	462.469	407.043	487.021	714.882	708.624	514.842
AT1G13195	325.097	0.85563	0.284504	3.00745	0.00263453	0.0428625	275.241	239.011	179.907	462.859	422.368	371.195
AT1G13200	1.90123	1.82901	3.40336	0.537414	0.590982	NA	1.60024	0	0.908622	0	0	8.8985
AT1G13210	2086.82	0.679584	0.189661	3.58316	0.000339462	0.0100566	1842.68	1318.91	1650.97	2412.36	2852.74	2443.27
AT1G13220	913.906	-0.0306513	0.204843	-0.149634	0.881054	0.967171	915.337	1006.74	848.653	882.571	792.817	1037.31
AT1G13230	4.75086	-3.05039	2.45397	-1.24304	0.213852	0.547118	19.2029	0	6.36035	2.9419	0	0
AT1G13240	0.133353	-0.384446	4.08047	-0.0942159	0.924938	NA	0.80012	0	0	0	0	0
AT1G13245	2822.81	-0.121574	0.166378	-0.730711	0.464956	0.779391	3173.28	2959.39	2693.16	2982.11	2508.95	2619.97
AT1G13250	170.7	-0.595606	0.365022	-1.6317	0.102743	0.38504	191.229	211.489	213.526	115.715	106.644	185.597
AT1G13260	3453.93	-0.804511	0.22631	-3.55491	0.000378113	0.010824	4247.84	5250.28	3681.74	3359.65	2261.98	1922.08
AT1G13270	200.443	0.39135	0.334747	1.16909	0.242366	0.580481	160.024	178.896	181.724	252.023	165.579	264.413
AT1G13280	210.356	-0.356139	0.344942	-1.03246	0.301857	0.64204	214.432	312.887	180.816	163.766	175.402	214.835
AT1G13290	0	NA	NA	NA	NA	NA	0	0	0	0	0	0
AT1G13300	78.2725	-2.26398	0.582864	-3.88424	0.000102651	0.00422411	112.817	67.3577	208.983	36.2835	23.8547	20.3394
AT1G13310	9.22871	0.222804	1.92319	0.115851	0.90777	0.976106	0.80012	24.6254	0	0	21.0482	8.8985
AT1G13320	679.027	0.374882	0.215413	1.7403	0.0818069	0.339708	519.278	575.076	679.649	726.65	767.559	805.95
AT1G13330	19.1154	0.62386	1.02939	0.606047	0.544483	0.826295	4.80072	31.1439	9.08622	18.6321	15.4354	35.594
AT1G13340	200.158	0.0405474	0.470434	0.0861916	0.931314	0.984094	107.216	311.439	173.547	289.287	220.305	99.1547
AT1G13350	2001.52	0.23661	0.17632	1.34194	0.179616	0.506901	1979.5	1738.26	1794.53	1915.18	2434.58	2147.08
AT1G13360	1462.57	-1.28349	0.217456	-5.90228	3.59e-09	8.9e-07	2065.11	2308.99	1847.23	1045.36	862.978	645.777
AT1G13370	8.32102	1.97974	1.53285	1.29154	0.196517	0.528781	0	2.89711	7.26898	15.6901	12.6289	11.4409
AT1G13380	301.71	0.376823	0.310177	1.21486	0.224418	0.560088	180.027	288.986	318.926	381.467	339.578	301.278
AT1G13390	5009.71	-0.347391	0.173949	-1.99708	0.0458161	0.251511	6681.8	5250.28	4898.38	4757.06	4209.65	4261.11
AT1G13400	0.666767	-2.59006	3.96033	-0.654002	0.51311	NA	4.0006	0	0	0	0	0
AT1G13410	15.5484	1.59367	1.04721	1.52182	0.128055	0.428339	4.0006	6.51849	12.7207	12.7482	28.0643	29.2379
AT1G13420	0.454311	-2.02114	3.98595	-0.507066	0.612109	NA	0	0	2.72587	0	0	0
AT1G13430	0.794617	3.41853	3.97418	0.860184	0.389688	NA	0	0	0	1.96127	2.80643	0
AT1G13440	7233.57	-0.461981	0.172563	-2.67717	0.00742466	0.0854677	8490.87	8673.21	7983.15	7230.22	5959.46	5064.52
AT1G13448	29.1823	0.0112188	0.76773	0.014613	0.988341	0.998	35.2053	23.1768	29.0759	45.1092	19.645	22.8819
AT1G13450	907.916	0.695228	0.230968	3.01006	0.00261193	0.0426198	696.104	525.1	859.556	1140.48	1017.33	1208.93
AT1G13460	394.898	-0.466128	0.312627	-1.491	0.135961	0.441047	494.474	564.211	316.2	395.196	235.74	363.567
AT1G13470	6.8998	-1.54353	1.65127	-0.934753	0.349916	0.687978	12.0018	5.06994	13.6293	0	5.61286	5.08486
AT1G13480	0	NA	NA	NA	NA	NA	0	0	0	0	0	0
AT1G13485	0	NA	NA	NA	NA	NA	0	0	0	0	0	0
AT1G13490	0.933473	-3.0752	3.94511	-0.779495	0.435688	NA	5.60084	0	0	0	0	0
AT1G13500	0.151437	-0.384446	4.08047	-0.0942159	0.924938	NA	0	0	0.908622	0	0	0
AT1G13510	0	NA	NA	NA	NA	NA	0	0	0	0	0	0
AT1G13520	19.5891	-2.46954	1.18229	-2.08878	0.0367276	0.222808	27.2041	52.1479	19.9897	0	4.20965	13.9834
AT1G13530	20.1419	0.627454	1.20947	0.518786	0.60391	0.858624	0	31.1439	16.3552	32.3609	16.8386	24.1531
AT1G13540	11.58	0.176389	1.44523	0.122049	0.90286	0.974691	0	21.7283	10.9035	14.7095	5.61286	16.5258
AT1G13550	18.601	0.439843	0.956508	0.459843	0.645629	0.878896	12.8019	14.4855	19.9897	8.82571	22.4515	33.0516
AT1G13560	3622.97	0.330123	0.172239	1.91666	0.0552818	0.279111	2718.81	3625.73	3285.58	3854.87	4352.78	3900.09
AT1G13570	236.601	0.143684	0.342638	0.419346	0.674963	0.889614	197.63	193.382	284.399	321.648	181.015	241.531
AT1G13580	139.983	0.219406	0.401622	0.546301	0.584859	0.848667	163.224	104.296	120.847	186.321	157.16	108.053
AT1G13590	0.133353	-0.384446	4.08047	-0.0942159	0.924938	NA	0.80012	0	0	0	0	0
AT1G13600	0	NA	NA	NA	NA	NA	0	0	0	0	0	0
AT1G13605	0	NA	NA	NA	NA	NA	0	0	0	0	0	0
AT1G13607	0	NA	NA	NA	NA	NA	0	0	0	0	0	0
AT1G13608	0	NA	NA	NA	NA	NA	0	0	0	0	0	0
AT1G13609	79.5547	4.62802	0.718371	6.44238	1.18e-10	4.96e-08	8.0012	0	10.9035	167.688	185.225	105.511
AT1G13610	5.53797	-1.90502	2.32306	-0.820045	0.412191	0.740395	20.003	0	6.36035	6.86444	0	0
AT1G13620	0.133353	-0.384446	4.08047	-0.0942159	0.924938	NA	0.80012	0	0	0	0	0
AT1G13630	11.2265	0.898142	1.4649	0.613106	0.539806	0.824083	13.602	0	9.99484	16.6708	4.20965	22.8819
AT1G13635	2.09573	-4.24217	3.56239	-1.19082	0.233724	NA	10.4016	2.17283	0	0	0	0
AT1G13640	405.563	-0.199341	0.266102	-0.749114	0.453789	0.769689	338.451	474.401	487.93	372.641	335.369	424.586
AT1G13650	488.31	-0.0656857	0.433689	-0.151458	0.879614	0.96715	409.661	588.113	499.742	360.873	903.671	167.8
AT1G13660.1	0	NA	NA	NA	NA	NA	0	0	0	0	0	0
AT1G13670	0.133353	-0.384446	4.08047	-0.0942159	0.924938	NA	0.80012	0	0	0	0	0
AT1G13680	0.266707	-1.26943	4.03914	-0.314283	0.753306	NA	1.60024	0	0	0	0	0
AT1G13690	356.475	0.315778	0.335822	0.940316	0.347055	0.685088	233.635	258.567	461.58	506.988	370.449	307.634
AT1G13700	1221.92	0.0586636	0.262892	0.223147	0.823421	0.949774	756.113	1488.39	1347.49	1500.37	1032.77	1206.38
AT1G13710	0.666767	-2.59006	3.96033	-0.654002	0.51311	NA	4.0006	0	0	0	0	0
AT1G13720	0	NA	NA	NA	NA	NA	0	0	0	0	0	0
AT1G13730	171.233	-0.281635	0.336764	-0.8363	0.402986	0.732446	169.625	208.592	185.359	157.882	171.192	134.749
AT1G13740	359.766	0.148471	0.439613	0.337732	0.735565	0.914688	250.438	216.559	556.985	240.255	237.143	657.218
AT1G13750	132.648	-0.95954	0.422786	-2.26956	0.0232342	0.169678	190.429	189.036	145.38	53.9349	105.241	111.867
AT1G13755	0.454311	-2.02114	3.98595	-0.507066	0.612109	NA	0	0	2.72587	0	0	0
AT1G13760	0	NA	NA	NA	NA	NA	0	0	0	0	0	0
AT1G13770	202.97	0.239535	0.32814	0.729977	0.465404	0.779707	212.832	185.415	159.917	212.798	263.805	183.055
AT1G13780	81.4458	-0.534224	0.578422	-0.923588	0.355701	0.693805	88.8133	110.814	89.9536	114.734	58.9351	25.4243
AT1G13790	27.565	-1.1359	1.02312	-1.11023	0.266899	0.607858	38.4058	31.8682	43.6139	23.5352	0	27.9667
AT1G13800	10.5273	-1.17906	1.42913	-0.825022	0.409359	0.737912	1.60024	31.1439	10.9035	2.9419	14.0322	2.54243
AT1G13810	75.896	-0.747109	0.599552	-1.24611	0.212723	0.547082	157.624	68.082	59.969	84.3345	56.1286	29.2379
AT1G13820	668.602	0.1496	0.212391	0.704362	0.481207	0.790161	654.498	681.544	565.163	663.889	768.962	677.557
AT1G13830	6.15028	0.969957	2.0225	0.479583	0.631524	0.87244	8.80132	0	3.63449	0	16.8386	7.62729
AT1G13840	0.133353	-0.384446	4.08047	-0.0942159	0.924938	NA	0.80012	0	0	0	0	0
AT1G13850	0	NA	NA	NA	NA	NA	0	0	0	0	0	0
AT1G13860	107.585	-0.329891	0.449554	-0.733817	0.46306	0.777326	72.8109	151.374	135.385	103.947	96.8219	85.1714
AT1G13870	117.854	0.445599	0.440585	1.01138	0.311834	0.651516	87.2131	95.6045	116.304	83.3539	140.322	184.326
AT1G13880	871.138	0.463552	0.219993	2.10713	0.0351067	0.217101	584.888	867.683	744.161	994.363	1100.12	935.614
AT1G13890	3.85316	-0.714548	2.64833	-0.269811	0.787306	0.935575	14.4022	0	0	4.90317	0	3.81364
AT1G13900	112.788	0.866538	0.432388	2.00407	0.0450621	0.249463	84.8127	72.4277	82.6846	155.921	94.0155	186.869
AT1G13910	264.454	0.198506	0.312208	0.635813	0.524898	0.815506	190.429	288.986	259.866	342.241	262.401	242.802
AT1G13920	83.0113	-2.08043	1.53129	-1.35861	0.17427	0.499415	160.024	103.572	139.019	0	68.7576	26.6955
AT1G13930	2643.61	-0.983563	0.190663	-5.15864	2.49e-07	3.54e-05	3300.49	3575.75	3656.29	1392.5	1848.04	2088.61
AT1G13940	108.9	0.163987	0.401152	0.40879	0.682694	0.892504	95.2143	97.7773	115.395	126.502	106.644	111.867
AT1G13950	303.924	0.165979	0.313091	0.530131	0.596021	0.854666	192.829	300.575	366.175	330.474	342.385	291.108
AT1G13960	450.796	0.352337	0.280795	1.25478	0.209558	0.543205	326.449	328.822	533.361	539.349	545.851	430.942
AT1G13970	14.6524	-5.10501	1.86746	-2.73366	0.00626344	0.0766789	0	60.8392	24.5328	0	0	2.54243
AT1G13980	127.05	0.0341764	0.470275	0.0726733	0.942066	0.98732	84.0126	112.263	180.816	143.173	72.9672	169.072
AT1G13990	721.825	0.522521	0.225386	2.31834	0.0204306	0.15777	672.901	479.471	625.132	797.256	952.784	803.408
AT1G14000	650.584	0.289526	0.244116	1.18602	0.235615	0.573494	535.28	738.762	482.478	811.965	691.785	643.235
AT1G14010	461.889	0.052927	0.235135	0.225092	0.821908	0.949291	400.06	500.475	459.763	491.298	479.9	439.84
AT1G14020	179.847	0.0703999	0.44493	0.158227	0.874278	0.965687	80.8121	267.258	178.09	187.301	224.515	141.105
AT1G14030	1553.24	0.323954	0.201113	1.61081	0.107222	0.3937	1127.37	1693.36	1317.5	1726.9	1801.73	1652.58
AT1G14040	29.9204	-0.00327159	0.758141	-0.00431529	0.996557	0.999234	44.0066	19.5555	26.35	34.3222	33.6772	21.6106
AT1G14048	0.151437	-0.384446	4.08047	-0.0942159	0.924938	NA	0	0	0.908622	0	0	0
AT1G14060	78.4807	-0.0311095	0.634296	-0.0490457	0.960883	0.991519	51.2077	49.2508	138.111	117.676	29.4675	85.1714
AT1G14070	121.82	-0.363126	0.521833	-0.695865	0.486513	0.793125	235.235	120.23	55.4259	84.3345	113.66	122.037
AT1G14071	9.79934	-0.790873	1.36754	-0.578317	0.56305	0.836215	28.0042	2.89711	6.36035	5.88381	4.20965	11.4409
AT1G14080	0.423738	2.50395	4.03277	0.620901	0.534665	NA	0	0	0	0	0	2.54243
AT1G14090	40.2449	0.813727	0.633595	1.2843	0.199036	0.530683	32.0048	31.8682	23.6242	48.0511	44.9029	61.0183
AT1G14100	0.133353	-0.384446	4.08047	-0.0942159	0.924938	NA	0.80012	0	0	0	0	0
AT1G14110	0	NA	NA	NA	NA	NA	0	0	0	0	0	0
AT1G14120	72.5046	2.0917	0.80952	2.58388	0.00976959	0.101485	68.8103	10.1399	3.63449	129.444	154.354	68.6456
AT1G14130	272.451	0.255692	0.31336	0.81597	0.414518	0.741631	183.227	239.736	322.561	320.667	300.288	268.226
AT1G14140	495.965	0.201644	0.29045	0.694248	0.487527	0.793856	414.462	538.862	431.595	741.359	463.061	386.449
AT1G14150	777.569	-0.140677	0.261215	-0.53855	0.590197	0.851645	689.703	937.938	818.668	826.675	896.655	495.774
AT1G14160	6.73436	6.49798	2.43615	2.66731	0.00764607	0.0868905	0	0	0	3.92254	36.4836	0
AT1G14170	18.6036	0.737112	1.15194	0.639887	0.522246	0.814932	28.8043	2.17283	10.9035	15.6901	7.01608	47.0349
AT1G14180	26.6711	-1.09486	1.13755	-0.962471	0.335813	0.67557	20.8031	74.6005	13.6293	16.6708	0	34.3228
AT1G14182	13.2432	-0.8077	1.19635	-0.675136	0.499589	0.800749	12.0018	5.06994	33.619	13.7289	11.2257	3.81364
AT1G14185	83.3479	-0.697271	0.522078	-1.33557	0.18169	0.508466	69.6104	120.23	119.029	46.0898	96.8219	48.3062
AT1G14190	15.2458	0.20754	1.29761	0.15994	0.872928	0.965263	3.20048	13.7613	25.4414	0.980634	11.2257	36.8652
AT1G14200	648.842	-0.873701	0.247706	-3.52716	0.000420037	0.0116186	688.903	943.008	887.724	530.523	352.207	490.689
AT1G14205	46.8985	0.909481	0.640786	1.41932	0.155805	0.473689	37.6056	30.4196	29.9845	98.0634	42.0965	43.2213
AT1G14210	227.636	0.365915	0.361734	1.01156	0.31175	0.651516	266.44	135.44	195.354	288.306	186.628	293.651
AT1G14220	0	NA	NA	NA	NA	NA	0	0	0	0	0	0
AT1G14225	0	NA	NA	NA	NA	NA	0	0	0	0	0	0
AT1G14230	193.032	0.115041	0.325353	0.353587	0.723648	0.90997	173.626	167.308	215.343	215.74	213.289	172.885
AT1G14240	0.980634	3.73913	3.96086	0.944021	0.345159	NA	0	0	0	5.88381	0	0
AT1G14250	186.191	-1.99974	1.16553	-1.71574	0.0862104	0.350312	313.647	222.353	357.997	161.805	57.5319	3.81364
AT1G14260	8.95492	1.24974	1.62307	0.769981	0.441311	0.761756	0	1.44855	14.538	7.84507	7.01608	22.8819
AT1G14270	1982.51	0.256872	0.161512	1.59042	0.111739	0.401335	1834.68	1843.28	1741.83	2275.07	2082.37	2117.84
AT1G14280	808.707	0.532542	0.269479	1.97619	0.048133	0.258769	602.49	482.368	899.536	1013.98	747.914	1105.96
AT1G14290	611.076	1.093	0.259376	4.21397	2.51e-05	0.00148086	401.66	272.328	497.016	845.307	798.43	851.714
AT1G14300	181.761	0.966669	0.402154	2.40373	0.0162288	0.137817	135.22	64.4606	169.912	239.275	228.724	252.972
AT1G14310	274.717	-0.295587	0.312386	-0.946226	0.344033	0.682334	249.637	309.99	348.002	196.127	315.724	228.819
AT1G14315	1.9734	4.73255	3.62205	1.3066	0.19135	NA	0	0	0	2.9419	0	8.8985
AT1G14320	7135.34	-0.147154	0.145376	-1.01224	0.311425	0.651516	7537.13	7982.98	6976.4	6848.75	6778.94	6687.86
AT1G14330	593.622	0.868243	0.295437	2.93885	0.00329437	0.0496674	515.277	307.093	438.864	826.675	505.158	968.666
AT1G14340	154.312	0.236443	0.387098	0.61081	0.541325	0.824799	170.426	91.2588	163.552	154.94	161.37	184.326
AT1G14345	805.044	-0.526788	0.228955	-2.30084	0.0214007	0.161631	885.733	985.74	979.494	681.541	795.623	502.13
AT1G14350	77.1573	-0.90216	0.56838	-1.58725	0.112456	0.402949	136.02	115.884	49.9742	71.5863	32.274	57.2047
AT1G14360	99.3394	0.694318	0.490015	1.41693	0.156503	0.474781	120.018	47.8023	59.969	142.192	119.273	106.782
AT1G14370	272.176	0.315019	0.294659	1.0691	0.285026	0.625491	283.242	220.18	224.43	299.093	253.982	352.126
AT1G14380	206.599	0.443597	0.322626	1.37496	0.169145	0.492634	186.428	178.896	159.917	229.468	195.047	289.837
AT1G14390	19.8891	-1.58471	1.19118	-1.33037	0.183395	0.510913	3.20048	10.1399	76.3242	12.7482	4.20965	12.7121
AT1G14400	1143.8	-0.149038	0.188583	-0.790305	0.429349	0.75359	1070.56	1360.92	1176.67	1071.83	1095.91	1086.89
AT1G14410	328.046	-0.0654489	0.312762	-0.209261	0.834244	0.95427	429.664	279.571	298.028	420.692	270.821	269.498
AT1G14420	0	NA	NA	NA	NA	NA	0	0	0	0	0	0
AT1G14430	31.1432	-0.996353	0.747982	-1.33206	0.182842	0.510238	42.4064	33.3167	49.0656	31.3803	15.4354	15.2546
AT1G14440	4.85649	-1.14367	2.30451	-0.496272	0.619702	0.866793	20.003	0	0	0.980634	5.61286	2.54243
AT1G14450	720.129	-0.39172	0.203114	-1.92857	0.0537842	0.275177	782.517	890.86	778.689	657.025	610.399	601.285
AT1G14455	6.23873	-0.89073	1.99547	-0.446377	0.655325	0.882709	14.4022	0	9.99484	8.82571	4.20965	0
AT1G14460	23.1174	1.08124	0.921269	1.17364	0.24054	0.578863	5.60084	29.6953	9.08622	30.3997	30.8708	33.0516
AT1G14470	2.31299	0.650124	3.12547	0.208008	0.835222	NA	0	0	5.45173	5.88381	0	2.54243
AT1G14480	39.7143	1.41997	0.67598	2.10062	0.0356747	0.218691	28.8043	11.5884	24.5328	53.9349	53.3222	66.1032
AT1G14490	14.2413	-0.837408	1.51142	-0.554053	0.579543	0.844875	39.2059	0	15.4466	0.980634	19.645	10.1697
AT1G14500	0.533413	-2.26838	3.97359	-0.570864	0.568092	NA	3.20048	0	0	0	0	0
AT1G14510	405.608	0.433112	0.276741	1.56504	0.117573	0.412307	324.849	284.641	427.052	557	390.094	450.01
AT1G14518	2.59115	2.25919	2.97956	0.758231	0.448313	0.766172	0	0	2.72587	3.92254	0	8.8985
AT1G14520	384.126	0.329956	0.352026	0.937305	0.348602	0.686676	189.628	354.171	477.935	464.821	305.901	512.3
AT1G14530	115.234	-0.00627033	0.501167	-0.0125115	0.990018	0.998265	73.611	96.3288	176.273	62.7606	137.515	144.918
AT1G14540	274.41	0.0330641	0.368788	0.0896562	0.92856	0.983491	158.424	380.245	275.312	343.222	282.046	207.208
AT1G14549	0	NA	NA	NA	NA	NA	0	0	0	0	0	0
AT1G14550	0	NA	NA	NA	NA	NA	0	0	0	0	0	0
AT1G14560	689.246	-0.0235829	0.217517	-0.108419	0.913664	0.978439	805.721	603.322	676.015	712.921	637.06	700.439
AT1G14570	563.999	-0.0068155	0.227812	-0.0299172	0.976133	0.994786	610.492	589.561	495.199	495.22	579.528	613.997
AT1G14580	132.494	-0.366571	0.484931	-0.755926	0.449694	0.767014	144.822	149.925	152.648	109.831	189.434	48.3062
AT1G14590	182.97	0.459843	0.331222	1.38832	0.165039	0.487071	181.627	129.645	150.831	200.049	225.918	209.75
AT1G14600	190.453	0.285503	0.384645	0.742251	0.457935	0.773219	250.438	131.818	132.659	216.72	248.369	162.715
AT1G14610	546.899	0.127217	0.254995	0.4989	0.61785	0.866144	494.474	428.772	646.03	608.974	470.077	633.065
AT1G14620	165.488	0.907402	0.375378	2.4173	0.0156359	0.135236	133.62	99.2259	112.669	262.81	237.143	147.461
AT1G14630	0.701608	3.22203	3.98391	0.808761	0.418653	NA	0	0	0	0	4.20965	0
AT1G14640	54.0526	-0.981379	0.665335	-1.47502	0.140208	0.449663	83.2125	52.1479	79.9587	27.4578	15.4354	66.1032
AT1G14642	86.2769	0.724288	0.497798	1.45499	0.145673	0.458294	55.2083	65.1849	74.507	60.7993	136.112	125.85
AT1G14650	458.164	-0.497435	0.279006	-1.78288	0.0746052	0.325141	630.495	585.94	391.616	304.977	440.61	395.348
AT1G14660	168.77	0.0129682	0.373927	0.0346811	0.972334	0.994085	113.617	178.172	212.618	189.262	147.338	171.614
AT1G14670	160.159	0.102963	0.42265	0.243612	0.807531	0.944534	121.618	150.65	191.719	212.798	88.4026	195.767
AT1G14680	17.221	1.69012	1.22784	1.3765	0.168667	0.492214	0	7.24277	17.2638	20.5933	37.8868	20.3394
AT1G14685	491.752	0.0358265	0.29943	0.119649	0.904761	0.975459	353.653	606.219	497.925	660.947	369.046	462.722
AT1G14686	0	NA	NA	NA	NA	NA	0	0	0	0	0	0
AT1G14687	54.0734	-0.441235	0.770808	-0.572432	0.567029	0.838084	36.8055	26.074	124.481	84.3345	33.6772	19.0682
AT1G14688	1.02906	3.80407	3.95849	0.960991	0.336557	NA	0	0	0	4.90317	0	1.27121
AT1G14690	435.395	0.277908	0.253064	1.09817	0.272129	0.61318	404.861	421.529	353.454	392.254	558.48	481.79
AT1G14700	1556.09	-0.462762	0.239305	-1.93378	0.0531404	0.273442	1913.89	1690.46	1807.25	1654.33	1421.46	849.171
AT1G14710	291.594	-0.539413	0.280388	-1.92381	0.0543789	0.276742	340.051	403.422	292.576	225.546	241.353	246.616
AT1G14720	931.243	0.649734	0.20338	3.19467	0.00139989	0.0279038	749.712	605.495	820.486	1164.99	1140.81	1105.96
AT1G14730	17.8029	-1.53105	1.0704	-1.43035	0.152617	0.469193	37.6056	21.7283	19.9897	10.787	15.4354	1.27121
AT1G14740	847.072	-0.0601698	0.232696	-0.258577	0.795961	0.939363	1003.35	802.498	787.775	802.159	1024.35	662.303
AT1G14750	4.32442	-2.05834	2.48474	-0.82839	0.40745	0.736064	0	10.1399	10.9035	4.90317	0	0
AT1G14755	0	NA	NA	NA	NA	NA	0	0	0	0	0	0
AT1G14760	0.302874	-1.42976	4.02543	-0.355182	0.722454	NA	0	0	1.81724	0	0	0
AT1G14770	157.958	0.357503	0.372588	0.959514	0.3373	0.67649	130.42	171.654	113.578	220.643	148.741	162.715
AT1G14780	173.35	0.480306	0.367775	1.30598	0.19156	0.52104	166.425	106.469	161.735	206.914	155.757	242.802
AT1G14790	108.818	-0.109903	0.46136	-0.238216	0.811714	0.945635	125.619	145.58	67.238	92.1796	133.306	88.985
AT1G14800	1.60024	-3.85247	3.92919	-0.980476	0.326851	NA	9.60144	0	0	0	0	0
AT1G14810	206.089	0.203522	0.373202	0.54534	0.585519	0.849082	142.421	276.674	155.374	208.875	182.418	270.769
AT1G14820	233.346	-0.693898	0.323584	-2.14441	0.0319998	0.205675	321.648	334.616	208.983	189.262	159.967	185.597
AT1G14830	359.386	-0.249802	0.252624	-0.988829	0.322747	0.66138	405.661	423.702	341.642	322.629	328.353	334.329
AT1G14840	178.073	0.00290076	0.472183	0.0061433	0.995098	0.999234	224.834	64.4606	244.419	150.037	224.515	160.173
AT1G14850	112.554	0.606112	0.47407	1.27853	0.201064	0.53194	92.0138	54.3207	121.755	160.824	159.967	86.4426
AT1G14860	143.145	0.238127	0.516065	0.461429	0.644491	0.878788	88.8133	141.234	163.552	51.9736	190.837	222.463
AT1G14870	754.008	-0.435623	0.297503	-1.46427	0.143121	0.454057	1118.57	898.827	583.335	569.748	470.077	883.494
AT1G14880	9.6745	-1.35845	1.78358	-0.761641	0.446274	0.764967	33.605	0	8.1776	7.84507	8.4193	0
AT1G14890	27.0566	-0.85818	1.09464	-0.783985	0.433049	0.75601	17.6026	36.2138	50.8828	15.6901	0	41.9501
AT1G14900	36.865	-0.190102	0.814226	-0.233475	0.815393	0.946846	69.6104	39.1109	9.08622	32.3609	25.2579	45.7637
AT1G14910	179.272	-0.284513	0.370021	-0.768912	0.441946	0.762164	170.426	273.052	147.197	182.398	148.741	153.817
AT1G14920	256.298	0.080431	0.314401	0.255823	0.798087	0.94001	268.84	211.489	267.135	226.527	223.111	340.686
AT1G14930	0.302874	-1.42976	4.02543	-0.355182	0.722454	NA	0	0	1.81724	0	0	0
AT1G14940	0	NA	NA	NA	NA	NA	0	0	0	0	0	0
AT1G14950	0	NA	NA	NA	NA	NA	0	0	0	0	0	0
AT1G14960	2.8773	-4.69551	3.5981	-1.305	0.191894	0.521477	0	0	17.2638	0	0	0
AT1G14970	43.2361	-0.242908	0.66219	-0.366826	0.713749	0.906453	65.6098	45.6294	29.0759	25.4965	49.1126	44.4925
AT1G14980	855.099	-0.536313	0.213246	-2.515	0.0119033	0.114067	1126.57	1073.38	836.841	717.824	627.238	748.745
AT1G14990	127.519	-0.010896	0.505593	-0.0215509	0.982806	0.996397	96.0144	66.6334	221.704	117.676	94.0155	169.072
AT1G15000	149.301	-0.0297728	0.40112	-0.0742241	0.940832	0.98722	109.616	126.024	217.161	143.173	133.306	166.529
AT1G15002	21.4462	-0.88826	1.07546	-0.825932	0.408843	0.737532	2.40036	52.8722	28.1673	12.7482	21.0482	11.4409
AT1G15010	9944.22	-0.0362883	0.214625	-0.169078	0.865736	0.963634	7456.32	12309.1	10441	7543.04	11055.9	10860
AT1G15015	66.1972	-1.88086	0.569997	-3.29976	0.000967662	0.021666	124.819	104.296	82.6846	14.7095	35.0804	35.594
AT1G15020	313.369	-0.398169	0.314062	-1.2678	0.204868	0.537462	396.059	298.402	375.261	299.093	179.612	331.787
AT1G15030	662.063	0.0570294	0.222632	0.25616	0.797827	0.939909	545.682	763.387	637.853	698.212	649.689	677.557
AT1G15040	407.038	0.0829057	0.262342	0.316022	0.751986	0.921436	369.655	435.29	380.713	361.854	376.062	518.656
AT1G15045	0	NA	NA	NA	NA	NA	0	0	0	0	0	0
AT1G15050	26.4825	0.547922	0.843615	0.649493	0.51602	0.810927	20.8031	25.3497	18.1724	10.787	39.29	44.4925
AT1G15060	295.755	-0.13159	0.293909	-0.447725	0.654352	0.882635	353.653	292.608	281.673	324.59	305.901	216.106
AT1G15080	95.5257	-0.210172	0.515851	-0.407428	0.683693	0.892688	97.6146	53.5965	156.283	83.3539	113.66	68.6456
AT1G15090	0	NA	NA	NA	NA	NA	0	0	0	0	0	0
AT1G15100	1516.49	0.498781	0.21941	2.27328	0.0230091	0.168326	1019.35	1291.39	1460.16	1590.59	1528.1	2209.37
AT1G15110	203.913	-0.0244965	0.314494	-0.0778916	0.937914	0.98632	188.828	212.937	215.343	204.953	172.596	228.819
AT1G15120	721.505	-0.315532	0.237034	-1.33117	0.183134	0.510636	928.939	866.235	604.234	572.69	667.931	688.998
AT1G15125	44.9411	3.34318	0.881268	3.7936	0.000148477	0.00550667	16.8025	7.24277	0	80.412	53.3222	111.867
AT1G15130	579.359	0.0814482	0.256888	0.317057	0.7512	0.921087	556.083	489.611	643.304	499.143	516.383	771.627
AT1G15140	507.409	0.119418	0.269888	0.442474	0.658146	0.883978	438.466	530.895	488.839	364.796	606.189	615.268
AT1G15150	4.17012	-5.23392	2.8561	-1.83254	0.0668707	0.3064	23.2035	0	1.81724	0	0	0
AT1G15160	58.5739	0.328914	0.584076	0.563136	0.573342	0.841711	60.8091	26.074	69.0553	64.7219	65.9512	64.8319
AT1G15165	87.3549	-0.189624	0.461824	-0.410597	0.681368	0.891814	106.416	66.6334	106.309	77.4701	75.7737	91.5275
AT1G15170	156.957	-0.175655	0.44379	-0.395806	0.692248	0.89703	200.83	79.6704	218.978	113.754	154.354	174.156
AT1G15175	43.6204	-1.50556	0.666763	-2.25802	0.0239443	0.173064	40.006	77.4976	76.3242	28.4384	14.0322	25.4243
AT1G15180	367.553	0.280589	0.255502	1.09819	0.272122	0.61318	285.643	362.138	348.002	396.176	376.062	437.298
AT1G15190	56.5165	-0.847517	0.749509	-1.13076	0.258155	0.59954	50.4076	92.7074	74.507	7.84507	32.274	81.3577
AT1G15200	2530.11	-0.223486	0.185834	-1.20261	0.229127	0.565595	3178.88	2564.66	2432.38	2115.23	2680.14	2209.37
AT1G15210	0	NA	NA	NA	NA	NA	0	0	0	0	0	0
AT1G15215	186.068	0.656519	0.395329	1.66069	0.0967752	0.373017	161.624	81.119	190.811	190.243	223.111	269.498
AT1G15220	164.635	0.818474	0.426587	1.91866	0.0550276	0.278429	167.225	120.23	69.9639	229.468	140.322	260.599
AT1G15230	558.293	-0.181057	0.226157	-0.80058	0.423375	0.749398	599.29	651.849	528.818	571.71	529.012	469.078
AT1G15240	1159.09	0.299022	0.209862	1.42485	0.154202	0.471689	1264.19	910.416	943.15	1141.46	1274.12	1421.22
AT1G15250	239.279	-0.0294942	0.309673	-0.095243	0.924122	0.982374	240.036	210.764	274.404	239.275	279.24	191.953
AT1G15260	444.126	-0.0724944	0.280507	-0.258441	0.796067	0.939363	501.675	407.043	456.128	297.132	524.803	477.977
AT1G15270	1382.69	-0.835918	0.228602	-3.65664	0.000255538	0.00829574	1685.85	2319.86	1311.14	980.634	935.945	1062.74
AT1G15280	1362.18	-0.0416694	0.179324	-0.232369	0.816252	0.947161	1424.21	1352.95	1367.48	1215.01	1488.81	1324.61
AT1G15290	1091.98	-0.351701	0.238022	-1.4776	0.139515	0.448907	1411.41	1313.11	947.693	892.377	1206.77	780.526
AT1G15300.1	39.8393	0.122114	0.779456	0.156666	0.875508	0.965973	9.60144	70.2548	34.5276	43.1479	42.0965	39.4077
AT1G15310	65.6546	-0.275009	0.533467	-0.515513	0.606195	0.860143	84.0126	66.6334	65.4208	82.3733	42.0965	53.391
AT1G15320	0	NA	NA	NA	NA	NA	0	0	0	0	0	0
AT1G15330	3.78592	-5.09163	3.28325	-1.55079	0.120953	0.418517	0	0	22.7155	0	0	0
AT1G15340	1330.52	0.120898	0.182596	0.662104	0.507904	0.805983	1291.39	1199.4	1332.95	1242.46	1535.12	1381.81
AT1G15350	667.636	0.0302058	0.213286	0.141621	0.887379	0.969519	723.308	585.94	672.38	622.703	722.656	678.829
AT1G15360	0	NA	NA	NA	NA	NA	0	0	0	0	0	0
AT1G15370	996.117	-0.0472707	0.218365	-0.216475	0.828617	0.952075	796.119	1217.51	1023.11	936.506	1067.85	935.614
AT1G15380	21.5872	-0.841213	1.08954	-0.772078	0.440068	0.761107	8.0012	28.2468	47.2483	34.3222	2.80643	8.8985
AT1G15385	0.302874	-1.42976	4.02543	-0.355182	0.722454	NA	0	0	1.81724	0	0	0
AT1G15390	410.512	-0.0579081	0.29201	-0.198309	0.842803	0.956109	380.857	540.31	334.373	386.37	499.545	321.617
AT1G15400	1400.73	0.00430747	0.201323	0.0213958	0.98293	0.996397	1285.79	1286.32	1623.71	1231.68	1334.46	1642.41
AT1G15405	8.98639	-2.47936	1.45869	-1.69972	0.0891828	0.356453	33.605	5.79421	6.36035	2.9419	1.40322	3.81364
AT1G15410	70.3499	0.33181	0.56909	0.583054	0.559857	0.834978	67.2101	78.9461	40.888	102.967	39.29	92.7987
AT1G15415	19.1782	-0.0492575	0.992255	-0.049642	0.960408	0.991225	11.2017	14.4855	32.7104	6.86444	29.4675	20.3394
AT1G15420	476.234	0.674786	0.245525	2.74834	0.00598981	0.0743661	293.644	420.805	386.164	605.051	554.27	597.471
AT1G15430	1349.48	0.191603	0.23015	0.832514	0.405119	0.734485	877.732	1591.96	1310.23	1473.89	1384.97	1458.08
AT1G15440	75.4825	-0.685218	0.567227	-1.20801	0.227042	0.563493	83.2125	93.4317	102.674	49.0317	26.6611	97.8835
AT1G15450	0.467739	2.62903	4.02248	0.653585	0.513379	NA	0	0	0	0	2.80643	0
AT1G15460	3.7551	0.369891	2.68023	0.138007	0.890235	0.970223	8.0012	0	1.81724	0	0	12.7121
AT1G15470	207.474	-0.00728997	0.354374	-0.0205714	0.983588	0.996397	199.23	144.131	280.764	181.417	210.482	228.819
AT1G15480	25.0524	-0.548518	2.76475	-0.198397	0.842734	0.956109	85.6128	0	3.63449	0	14.0322	47.0349
AT1G15490	62.3488	0.875547	0.748991	1.16897	0.242417	0.580481	66.41	5.79421	59.969	80.412	54.7254	106.782
AT1G15500	608.889	0.236279	0.22181	1.06523	0.28677	0.627345	497.675	545.38	634.218	617.8	722.656	635.607
AT1G15510	28.3947	1.33957	0.998806	1.34117	0.179865	0.507066	16.0024	31.1439	0.908622	39.2254	58.9351	24.1531
AT1G15520	41.2845	-0.758123	0.693104	-1.09381	0.27404	0.614947	40.006	85.4646	29.9845	24.5159	30.8708	36.8652
AT1G15530	13.6526	0.256204	1.17954	0.217207	0.828047	0.951864	9.60144	16.6584	10.9035	1.96127	22.4515	20.3394
AT1G15540	0.467739	2.62903	4.02248	0.653585	0.513379	NA	0	0	0	0	2.80643	0
AT1G15550	110.759	-0.794908	0.471272	-1.68673	0.0916556	0.362101	102.415	182.518	137.202	110.812	47.7093	83.9002
AT1G15560.1	0	NA	NA	NA	NA	NA	0	0	0	0	0	0
AT1G15570	12.9868	-2.26637	1.39717	-1.62211	0.104779	0.389381	17.6026	5.79421	40.888	0	9.82251	3.81364
AT1G15580	33.9197	-0.610508	1.30074	-0.469355	0.638816	0.875396	0	13.037	109.943	5.88381	9.82251	64.8319
AT1G15590	0	NA	NA	NA	NA	NA	0	0	0	0	0	0
AT1G15600	0	NA	NA	NA	NA	NA	0	0	0	0	0	0
AT1G15610	0.133353	-0.384446	4.08047	-0.0942159	0.924938	NA	0.80012	0	0	0	0	0
AT1G15620	0	NA	NA	NA	NA	NA	0	0	0	0	0	0
AT1G15630	2.69647	-4.603	3.22644	-1.42665	0.153681	0.470694	8.0012	0	8.1776	0	0	0
AT1G15640	0	NA	NA	NA	NA	NA	0	0	0	0	0	0
AT1G15650	0	NA	NA	NA	NA	NA	0	0	0	0	0	0
AT1G15660	38.3207	-0.00454965	0.66253	-0.00686709	0.994521	0.999158	29.6044	49.2508	36.3449	42.1673	28.0643	44.4925
AT1G15670	335.95	1.25697	0.489162	2.56964	0.0101805	0.103971	208.831	99.9502	286.216	369.699	172.596	878.409
AT1G15680	0	NA	NA	NA	NA	NA	0	0	0	0	0	0
AT1G15690	3057.02	-0.152258	0.174691	-0.871582	0.383436	0.717146	3087.66	3690.91	2874.88	2787.94	3213.36	2687.35
AT1G15700	85.1237	0.428221	0.535137	0.800208	0.423591	0.749528	47.2071	105.744	64.5122	65.7025	81.3865	146.19
AT1G15710	198.635	-0.476896	0.347132	-1.37381	0.169499	0.493325	202.43	281.744	209.892	213.778	140.322	143.647
AT1G15720	59.116	-0.291012	0.76125	-0.382282	0.702252	0.901707	42.4064	139.061	13.6293	59.8187	33.6772	66.1032
AT1G15730	1167.91	0.190068	0.208738	0.910557	0.362529	0.699398	908.136	1218.96	1145.77	1231.68	1431.28	1071.63
AT1G15740	2498.87	0.188744	0.161193	1.17092	0.241632	0.579768	2469.97	2358.24	2177.97	2559.46	2845.72	2581.84
AT1G15750	720.809	-0.00484316	0.244738	-0.0197892	0.984212	0.996397	883.332	568.557	715.085	820.791	592.157	744.932
AT1G15757	0	NA	NA	NA	NA	NA	0	0	0	0	0	0
AT1G15760	1.80996	4.60698	3.75891	1.22562	0.220343	NA	0	0	0	1.96127	0	8.8985
AT1G15770	0	NA	NA	NA	NA	NA	0	0	0	0	0	0
AT1G15772	1.51938	4.36348	3.94195	1.10693	0.268323	NA	0	0	0	7.84507	0	1.27121
AT1G15780	186.828	0.021775	0.38579	0.0564426	0.954989	0.990142	268.04	164.411	123.573	188.282	220.305	156.359
AT1G15790	268.826	0.620548	0.292611	2.12073	0.0339446	0.213232	255.238	187.588	192.628	293.21	328.353	355.94
AT1G15800	182.135	-0.0227343	0.404124	-0.0562557	0.955138	0.990247	118.418	172.378	259.866	136.308	165.579	240.26
AT1G15810	393.962	0.316187	0.298393	1.05963	0.289312	0.629701	279.242	479.471	293.485	410.886	520.593	380.093
AT1G15820	37916.5	-1.16047	0.241093	-4.81338	1.48e-06	0.000154018	39329.1	66587.8	51266.3	31675.5	22358.8	16281.7
AT1G15825	6.50263	-4.87875	2.04352	-2.38742	0.0169669	0.141127	5.60084	26.074	6.36035	0.980634	0	0
AT1G15830	4.51479	-0.149238	2.48444	-0.0600693	0.9521	0.989533	0	4.34566	9.99484	12.7482	0	0
AT1G15840	40.7347	0.0950083	0.748467	0.126937	0.89899	0.972939	14.4022	60.8392	42.7052	22.5546	50.5158	53.391
AT1G15850	0	NA	NA	NA	NA	NA	0	0	0	0	0	0
AT1G15860	670.828	-0.367863	0.26111	-1.40884	0.158882	0.478895	528.879	997.329	741.436	607.993	555.674	593.657
AT1G15870	35.9434	-1.00916	0.77262	-1.30616	0.1915	0.521036	29.6044	73.8762	40.888	40.206	19.645	11.4409
AT1G15880	2750.46	-0.401155	0.166146	-2.41447	0.0157581	0.135735	2952.44	3087.59	3351	2363.33	2612.79	2135.64
AT1G15885	523.634	-2.0565	0.266021	-7.7306	1.07e-14	1.5e-11	775.316	1034.27	723.263	219.662	232.934	156.359
AT1G15890	445.083	-0.79297	0.26296	-3.01555	0.00256509	0.0422151	603.29	472.228	616.954	275.558	399.917	302.549
AT1G15900	76.6832	-1.0132	0.502647	-2.01573	0.0438282	0.246048	116.818	68.082	122.664	43.1479	54.7254	54.6622
AT1G15910	239.711	-1.03408	0.379427	-2.72538	0.00642278	0.0774919	300.845	194.106	471.575	161.805	186.628	123.308
AT1G15920	528.967	0.0477641	0.232729	0.205235	0.837389	0.954859	553.683	543.932	462.489	523.659	614.609	475.434
AT1G15930	1741.45	-0.130505	0.176639	-0.738825	0.460013	0.774904	1945.09	1823	1691.85	1651.39	1842.42	1494.95
AT1G15940	182.596	0.107964	0.388221	0.2781	0.780935	0.933466	247.237	158.617	121.755	242.217	165.579	160.173
AT1G15950	265.723	0.530136	0.282056	1.87954	0.0601709	0.290596	201.63	212.937	238.059	342.241	318.53	280.938
AT1G15960	37.3419	0.332542	0.747602	0.444812	0.656456	0.883253	51.2077	30.4196	17.2638	20.5933	57.5319	47.0349
AT1G15970	211.345	-0.209358	0.358322	-0.584273	0.559036	0.834342	144.822	279.571	255.323	185.34	230.127	172.885
AT1G15980	421.096	-0.417942	0.285927	-1.46171	0.143821	0.455276	466.47	461.364	517.006	374.602	463.061	244.073
AT1G15990	24.9311	-0.000177393	0.807797	-0.000219601	0.999825	0.999872	27.2041	15.9341	31.8018	28.4384	18.2418	27.9667
AT1G16000	146.114	-0.857403	0.442623	-1.9371	0.0527337	0.272287	265.64	182.518	117.212	133.366	67.3544	110.596
AT1G16010	902.397	0.167844	0.209471	0.801276	0.422972	0.748999	708.906	857.543	984.038	992.402	881.22	990.276
AT1G16020	277.866	-0.300555	0.325451	-0.923505	0.355744	0.693805	367.255	202.073	350.728	214.759	253.982	278.396
AT1G16022	0	NA	NA	NA	NA	NA	0	0	0	0	0	0
AT1G16025	0	NA	NA	NA	NA	NA	0	0	0	0	0	0
AT1G16030	46.1462	1.43089	0.668465	2.14056	0.0323097	0.207123	28.0042	11.5884	35.4363	48.0511	67.3544	86.4426
AT1G16040	719.761	-0.0706414	0.219767	-0.321438	0.747879	0.919922	777.717	776.424	658.751	825.694	620.221	659.76
AT1G16060	85.7084	-0.572558	0.534464	-1.07127	0.284046	0.624866	69.6104	149.201	89.0449	102.967	58.9351	44.4925
AT1G16070	1.09892	3.87951	3.95588	0.980696	0.326743	NA	0	0	0	0.980634	5.61286	0
AT1G16080	951.387	-0.368752	0.205879	-1.79112	0.0732746	0.322169	1064.16	1098.73	1054	877.668	938.751	675.015
AT1G16090	192.161	0.30713	0.384312	0.799167	0.424193	0.749965	122.418	148.477	244.419	183.379	275.03	179.241
AT1G16100	0	NA	NA	NA	NA	NA	0	0	0	0	0	0
AT1G16110	1787.38	-0.315483	0.190043	-1.66006	0.0969019	0.373036	2145.12	1932.37	1867.22	1395.44	1906.97	1477.15
AT1G16120	20.1557	-1.81436	0.965138	-1.87989	0.0601229	0.290593	34.4052	39.1109	20.8983	15.6901	7.01608	3.81364
AT1G16130	692.583	-0.258154	0.199943	-1.29113	0.196657	0.528828	757.714	729.346	775.963	616.819	655.302	620.353
AT1G16140	12.0437	-0.130142	1.81445	-0.0717252	0.942821	0.987338	0	34.041	3.63449	0	2.80643	31.7804
AT1G16150	29.1308	-1.02487	0.860624	-1.19084	0.233716	0.571318	9.60144	59.3907	48.157	17.6514	19.645	20.3394
AT1G16160	12.6283	1.99696	1.49635	1.33456	0.182022	0.509143	14.4022	0.724277	0	5.88381	28.0643	26.6955
AT1G16170	624.776	-0.230599	0.241692	-0.954102	0.340032	0.679001	583.287	843.782	596.965	635.451	510.771	578.403
AT1G16180	2993.98	0.334594	0.162052	2.06473	0.0389488	0.230898	2560.38	2421.26	2963.92	3351.81	3394.38	3272.11
AT1G16190	271.906	0.717499	0.277538	2.58523	0.0097314	0.101485	224.034	191.933	200.805	307.919	350.804	355.94
AT1G16210	780.423	0.243715	0.225772	1.07948	0.280375	0.621094	634.495	613.462	896.81	885.513	820.881	831.374
AT1G16220	88.387	-1.49041	0.655345	-2.27424	0.0229516	0.168326	98.4148	197.003	96.3139	75.5088	8.4193	54.6622
AT1G16225	0	NA	NA	NA	NA	NA	0	0	0	0	0	0
AT1G16230	7.14725	-5.00845	2.07916	-2.40888	0.0160015	0.136939	16.8025	23.9011	0.908622	0	0	1.27121
AT1G16240	1860.51	0.209353	0.166745	1.25553	0.209287	0.54277	1730.66	1767.23	1679.13	2025.01	2134.29	1826.74
AT1G16250	164.262	-0.403562	0.367593	-1.09785	0.27227	0.613393	228.834	173.826	158.1	120.618	179.612	124.579
AT1G16260	1193.33	0.75781	0.245699	3.0843	0.0020403	0.036154	919.338	895.206	845.927	1557.25	1953.28	989.005
AT1G16270	267.824	0.03982	0.306443	0.129943	0.896612	0.972677	249.637	323.027	218.978	234.372	324.143	256.785
AT1G16280	120.14	-0.173067	0.405472	-0.426827	0.669505	0.888398	99.2149	149.201	133.567	119.637	127.693	91.5275
AT1G16290	0	NA	NA	NA	NA	NA	0	0	0	0	0	0
AT1G16300	59.9959	-0.845166	0.605453	-1.39592	0.162737	0.483933	93.614	44.9051	92.6794	30.3997	32.274	66.1032
AT1G16310	3.46919	-1.45853	3.07305	-0.474621	0.635057	0.873883	15.2023	0	0	0	5.61286	0
AT1G16320	1056.95	0.227373	0.234816	0.968303	0.332893	0.672263	824.124	1022.68	1074.9	1263.06	1334.46	822.476
AT1G16330	12.5869	-0.31963	1.27611	-0.250472	0.802222	0.941984	4.0006	21.7283	16.3552	20.5933	1.40322	11.4409
AT1G16340	53.9799	-0.529016	0.594594	-0.88971	0.373622	0.709366	64.0096	77.4976	49.9742	60.7993	44.9029	26.6955
AT1G16350	155.043	0.50883	0.380259	1.33812	0.180859	0.507777	110.417	157.168	116.304	177.495	137.515	231.361
AT1G16360	11.6076	-0.772711	1.66113	-0.46517	0.641809	0.877298	28.0042	7.96704	8.1776	25.4965	0	0
AT1G16370	2352.24	-0.370229	0.184108	-2.01094	0.0443323	0.247362	2485.17	2852.93	2619.56	2283.9	2200.24	1671.65
AT1G16380	45.8821	0.454311	0.697571	0.651276	0.514869	0.810139	56.0084	23.9011	36.3449	50.0123	23.8547	85.1714
AT1G16390	44.896	0.50554	0.704151	0.717942	0.472793	0.784483	13.602	40.5595	57.2432	46.0898	40.6933	71.188
AT1G16400	14.9318	-1.79818	1.4458	-1.24373	0.2136	0.547118	31.2047	38.3867	0	5.88381	1.40322	12.7121
AT1G16410	96.9654	-0.975693	0.667889	-1.46086	0.144054	0.455693	76.0114	276.674	32.7104	50.0123	56.1286	90.2562
AT1G16420	180.772	0.674347	0.369344	1.8258	0.0678811	0.309163	136.02	97.0531	185.359	252.023	186.628	227.547
AT1G16430	124.211	-0.216944	0.414015	-0.524001	0.600278	0.85732	113.617	139.061	148.105	136.308	131.902	76.2729
AT1G16440	2.01682	4.75764	3.59468	1.32352	0.185662	NA	0	0	0	0	7.01608	5.08486
AT1G16445	72.8354	0.192164	0.588459	0.326554	0.744005	0.918209	34.4052	53.5965	116.304	85.3152	53.3222	94.0699
AT1G16450	0	NA	NA	NA	NA	NA	0	0	0	0	0	0
AT1G16460	1613.56	0.245397	0.196206	1.25071	0.21104	0.545304	1622.64	1179.12	1628.25	1640.6	1897.15	1713.6
AT1G16470	405.558	-0.00308216	0.255673	-0.0120551	0.990382	0.998265	378.457	409.941	428.87	339.299	482.706	394.077
AT1G16480	23.5581	0.621186	1.43767	0.43208	0.665683	0.886889	37.6056	0	18.1724	37.2641	0	48.3062
AT1G16489	0.454311	-2.02114	3.98595	-0.507066	0.612109	NA	0	0	2.72587	0	0	0
AT1G16490	19.913	0.314519	0.995328	0.315995	0.752006	0.921436	4.0006	27.5225	21.8069	31.3803	18.2418	16.5258
AT1G16500	31.4389	-0.451608	0.782017	-0.577492	0.563607	0.836445	49.6074	42.008	17.2638	29.419	35.0804	15.2546
AT1G16510	55.0438	-1.96088	0.619803	-3.16372	0.00155767	0.0298919	92.0138	96.3288	74.507	20.5933	11.2257	35.594
AT1G16515	29.8095	-2.60589	1.06687	-2.44255	0.0145839	0.129298	77.6116	60.115	15.4466	1.96127	22.4515	1.27121
AT1G16520	12.2607	-1.03561	1.40151	-0.738924	0.459953	0.774904	17.6026	28.2468	3.63449	8.82571	0	15.2546
AT1G16530	2.12471	4.84611	3.93198	1.23249	0.217768	NA	0	0	0	12.7482	0	0
AT1G16540	145.819	-0.229206	0.385179	-0.595064	0.551801	0.830021	188.028	107.193	177.181	141.211	129.096	132.206
AT1G16550	29.4202	-0.240312	0.796692	-0.301638	0.762928	0.924174	20.8031	39.1109	35.4363	11.7676	35.0804	34.3228
AT1G16560	326.727	0.194093	0.279947	0.69332	0.488109	0.79397	252.838	362.863	298.937	395.196	307.304	343.228
AT1G16570	116.386	-0.835948	0.474225	-1.76276	0.0779402	0.332209	116.818	159.341	171.73	86.2958	42.0965	122.037
AT1G16590	164.821	-0.0197193	0.360543	-0.0546935	0.956383	0.990409	196.029	165.859	136.293	196.127	131.902	162.715
AT1G16600	1.04155	-3.23433	3.94112	-0.820663	0.411838	NA	4.80072	1.44855	0	0	0	0
AT1G16610	593.615	0.182851	0.254824	0.717558	0.47303	0.784532	534.48	578.697	555.168	609.954	467.271	816.12
AT1G16620.1	0.211869	1.53911	4.08047	0.377189	0.706033	NA	0	0	0	0	0	1.27121
AT1G16630	5.45401	-0.503112	2.06725	-0.243373	0.807717	0.944534	0	13.7613	5.45173	5.88381	0	7.62729
AT1G16635	31.944	-0.541448	0.805762	-0.67197	0.501603	0.801577	44.0066	36.9381	32.7104	22.5546	8.4193	47.0349
AT1G16640	7.51102	6.66468	2.01304	3.31076	0.000930438	0.0210563	0	0	0	26.4771	8.4193	10.1697
AT1G16650	398.445	0.188413	0.298255	0.631718	0.527571	0.817188	429.664	328.822	358.906	368.718	318.53	586.03
AT1G16660.1	0	NA	NA	NA	NA	NA	0	0	0	0	0	0
AT1G16670	300.429	-0.102673	0.301569	-0.340463	0.733508	0.913904	275.241	353.447	304.388	298.113	357.82	213.564
AT1G16680	109.495	-0.133443	0.418786	-0.318643	0.749997	0.920465	118.418	98.5016	127.207	132.386	94.0155	86.4426
AT1G16690	134.083	0.769604	0.407723	1.88757	0.0590842	0.288217	121.618	76.049	99.9484	195.146	192.241	119.494
AT1G16700	606.344	0.0900109	0.237177	0.379509	0.70431	0.903117	483.272	619.256	659.66	563.865	582.335	729.677
AT1G16705	20.6535	1.96362	1.42891	1.37421	0.169376	0.493172	0	0	25.4414	27.4578	25.2579	45.7637
AT1G16710	274.303	-0.173844	0.321552	-0.540639	0.588757	0.850817	352.053	252.048	268.043	205.933	224.515	343.228
AT1G16720	1205.11	-0.0190546	0.233842	-0.081485	0.935056	0.985563	1156.97	1046.58	1435.62	1199.32	1497.23	894.935
AT1G16730	301.585	-0.341552	0.307355	-1.11126	0.266454	0.607436	365.655	364.311	281.673	323.609	284.853	189.411
AT1G16740	681.478	-0.0941857	0.240504	-0.391618	0.695341	0.89845	677.702	874.926	557.894	662.909	726.866	588.572
AT1G16750	189.717	-0.666909	0.338386	-1.97086	0.0487404	0.260711	275.241	203.522	219.887	150.037	119.273	170.343
AT1G16760	1.49817	-1.27038	3.01626	-0.421179	0.673625	NA	1.60024	2.89711	1.81724	0	1.40322	1.27121
AT1G16770	39.7175	0.343646	0.744824	0.461379	0.644527	0.878788	46.407	30.4196	28.1673	51.9736	67.3544	13.9834
AT1G16780	179.566	-0.241121	0.367266	-0.65653	0.511483	0.808374	181.627	211.489	189.902	138.269	231.531	124.579
AT1G16790	83.3404	-1.0024	0.605073	-1.65666	0.0975879	0.374445	39.2059	194.106	99.9484	48.0511	72.9672	45.7637
AT1G16800	64.2298	-0.454007	0.509935	-0.890323	0.373292	0.70906	82.4124	66.6334	73.5984	50.0123	63.1447	49.5774
AT1G16810	723.913	-0.299958	0.236122	-1.27035	0.20396	0.535815	607.291	923.453	865.917	670.754	700.205	575.86
AT1G16820	368.038	-0.146236	0.274953	-0.531857	0.594825	0.854402	359.254	489.611	310.749	341.261	343.788	363.567
AT1G16825	171.337	1.14758	0.382924	2.9969	0.00272739	0.0438489	155.223	81.8432	82.6846	248.1	216.095	244.073
AT1G16830	14.9019	1.28658	1.29946	0.990086	0.322132	0.660781	0	15.9341	9.99484	15.6901	35.0804	12.7121
AT1G16840	602.051	0.274175	0.251256	1.09122	0.275178	0.615681	405.661	686.614	542.447	634.47	642.673	700.439
AT1G16850	151.128	-0.118514	0.517215	-0.22914	0.81876	0.948479	87.2131	205.695	178.999	100.025	72.9672	261.87
AT1G16858	0	NA	NA	NA	NA	NA	0	0	0	0	0	0
AT1G16860	0	NA	NA	NA	NA	NA	0	0	0	0	0	0
AT1G16870	145.349	0.877752	0.425901	2.06093	0.0393097	0.231982	82.4124	147.752	77.2329	249.081	138.918	176.699
AT1G16880	8974.03	0.391042	0.165183	2.36733	0.0179172	0.145415	7487.52	8093.79	7713.29	9527.84	12036.8	8984.95
AT1G16890	3116.83	0.121163	0.180728	0.670417	0.502592	0.802126	3262.89	3312.84	2381.5	3187.06	3335.44	3221.26
AT1G16900	121.311	-0.188419	0.391734	-0.480988	0.630525	0.871683	104.016	135.44	148.105	103.947	120.677	115.681
AT1G16905	0.211869	1.53911	4.08047	0.377189	0.706033	NA	0	0	0	0	0	1.27121
AT1G16910	0.848289	-1.66449	3.95901	-0.420431	0.67417	NA	3.20048	0	0.908622	0.980634	0	0
AT1G16916	212.101	-0.426209	0.393801	-1.08229	0.279122	0.619948	127.219	333.167	268.952	168.669	211.886	162.715
AT1G16920	148.856	-0.340366	0.463557	-0.734249	0.462797	0.777131	204.831	94.1559	200.805	184.359	72.9672	136.02
AT1G16930	131.723	-0.357227	0.448006	-0.797373	0.425235	0.751113	188.828	152.098	102.674	88.2571	85.5962	172.885
AT1G16940	2.80575	-2.05042	3.00599	-0.682112	0.495168	0.798368	13.602	0	0	1.96127	0	1.27121
AT1G16950	0.933473	-3.0752	3.94511	-0.779495	0.435688	NA	5.60084	0	0	0	0	0
AT1G16960	2.74684	-3.55731	3.35961	-1.05885	0.289669	0.630154	0	15.2098	0	0	0	1.27121
AT1G16970	323.584	0.226925	0.302237	0.750819	0.452762	0.769337	284.043	359.241	251.688	423.634	256.789	366.11
AT1G16980	1.12434	-3.34648	3.93857	-0.84967	0.395509	NA	2.40036	4.34566	0	0	0	0
AT1G17000	0.40006	-1.85372	3.99557	-0.463944	0.642688	NA	2.40036	0	0	0	0	0
AT1G17010	0	NA	NA	NA	NA	NA	0	0	0	0	0	0
AT1G17020	82.6495	-0.777074	0.60889	-1.27621	0.20188	0.533057	141.621	75.3248	96.3139	50.993	21.0482	110.596
AT1G17030	0	NA	NA	NA	NA	NA	0	0	0	0	0	0
AT1G17040	185.952	-0.301117	0.329733	-0.913216	0.361129	0.698039	213.632	176.723	225.338	153.96	192.241	153.817
AT1G17050	489.069	-0.414658	0.23253	-1.78325	0.0745464	0.325045	505.676	606.219	565.163	463.84	408.336	385.178
AT1G17060	440.26	0.653105	0.33583	1.94475	0.0518049	0.269618	472.071	182.518	372.535	494.24	475.69	644.506
AT1G17070	72.8032	0.358193	0.652774	0.548724	0.583195	0.847394	90.4136	23.9011	77.2329	60.7993	42.0965	142.376
AT1G17080	1192.85	0.155826	0.209894	0.742401	0.457844	0.773151	1141.77	1076.27	1167.58	1166.95	1038.38	1566.14
AT1G17090	43.9278	-0.574407	0.675924	-0.84981	0.395431	0.72649	70.4106	25.3497	61.7863	24.5159	42.0965	39.4077
AT1G17100	1269.44	-0.0456386	0.227792	-0.200352	0.841205	0.955807	1505.83	1260.24	1102.16	1317.97	1498.63	931.8
AT1G17110	860.489	0.281265	0.225635	1.24655	0.212563	0.547047	871.331	580.145	879.546	922.777	956.993	952.14
AT1G17120	241.331	-0.0793781	0.359623	-0.220726	0.825306	0.950496	217.633	168.756	357.997	231.43	195.047	277.125
AT1G17130	443.33	0.378091	0.282594	1.33793	0.18092	0.507777	507.276	272.328	377.078	470.704	544.448	488.146
AT1G17140	284.4	-1.11124	0.349101	-3.18315	0.00145684	0.0286392	436.865	466.434	262.592	138.269	154.354	247.887
AT1G17145	823.978	0.161594	0.234425	0.689323	0.49062	0.795817	865.73	725.001	743.253	862.958	665.124	1081.8
AT1G17147	1075.92	-0.912453	0.230098	-3.96549	7.32e-05	0.00334024	1699.45	1413.06	1103.07	794.314	840.526	605.098
AT1G17150	0.120713	-0.384446	4.08047	-0.0942159	0.924938	NA	0	0.724277	0	0	0	0
AT1G17160	417.565	-0.0208792	0.301163	-0.0693286	0.944728	0.987705	299.245	405.595	557.894	511.891	349.401	381.364
AT1G17170	70.6798	-0.257308	0.594054	-0.433139	0.664914	0.886808	96.8145	28.9711	105.4	76.4895	61.7415	54.6622
AT1G17180	2.42299	-4.44746	3.82211	-1.16361	0.24458	0.58286	0	0	14.538	0	0	0
AT1G17190	164.16	0.299502	0.403633	0.742014	0.458079	0.773401	202.43	110.09	129.024	157.882	138.918	246.616
AT1G17200	1301.27	0.0648677	0.232934	0.278481	0.780643	0.933449	1292.99	1230.55	1291.15	896.3	1512.67	1583.93
AT1G17210	632.774	0.475456	0.235005	2.02317	0.0430558	0.243843	635.295	443.982	508.828	701.153	834.914	672.473
AT1G17220	645.768	-0.0770752	0.204628	-0.37666	0.706427	0.903636	681.702	633.018	674.197	614.858	658.108	612.725
AT1G17230	91.9611	-0.0940609	0.474683	-0.198155	0.842924	0.956109	63.2095	115.16	106.309	69.625	85.5962	111.867
AT1G17232	0	NA	NA	NA	NA	NA	0	0	0	0	0	0
AT1G17235	8.27967	0.503703	1.70782	0.294939	0.76804	0.926848	0	19.5555	0.908622	8.82571	14.0322	6.35607
AT1G17240	43.5961	0.454439	0.653802	0.695072	0.48701	0.793506	20.003	37.6624	52.7001	45.1092	60.3383	45.7637
AT1G17250	0	NA	NA	NA	NA	NA	0	0	0	0	0	0
AT1G17255	28.5248	0.626696	0.751369	0.834072	0.40424	0.733898	18.4028	21.7283	27.2587	39.2254	23.8547	40.6789
AT1G17260	51.5102	0.721008	0.643383	1.12065	0.262436	0.603697	16.0024	47.078	53.6087	52.9542	63.1447	76.2729
AT1G17270	139.122	0.209418	0.385787	0.542833	0.587245	0.8498	145.622	123.127	118.121	141.211	192.241	114.409
AT1G17275.1	1.96868	-4.14742	3.92505	-1.05665	0.290669	NA	0	0	11.8121	0	0	0
AT1G17277.1	2.68216	1.36364	2.94595	0.462887	0.643445	0.878017	0	0	4.54311	3.92254	0	7.62729
AT1G17280	1238.85	0.231251	0.198853	1.16293	0.244859	0.583063	1286.59	981.395	1152.13	1496.45	1333.06	1183.5
AT1G17285	0	NA	NA	NA	NA	NA	0	0	0	0	0	0
AT1G17290	5003.29	-0.014679	0.181968	-0.0806682	0.935706	0.985608	6259.34	4496.31	4330.49	4992.41	4908.45	5032.74
AT1G17300	31.669	0.792868	0.826403	0.95942	0.337347	0.67649	12.8019	23.9011	32.7104	12.7482	51.919	55.9334
AT1G17310	1.8585	-1.88687	3.15797	-0.597496	0.550176	NA	0.80012	7.96704	0	0.980634	1.40322	0
AT1G17330	499.735	0.613508	0.253651	2.41871	0.0155756	0.134769	436.065	330.994	417.966	504.046	580.931	728.406
AT1G17340	819.504	0.445649	0.201509	2.21156	0.0269971	0.186641	756.913	640.26	684.192	852.171	990.67	992.819
AT1G17345	12.3402	1.95334	1.87079	1.04412	0.296429	0.636188	15.2023	0	0	24.5159	0	34.3228
AT1G17350	378.043	-0.0525842	0.306497	-0.171565	0.86378	0.962956	444.067	256.394	455.22	432.46	297.482	382.636
AT1G17360	879.963	0.23758	0.256186	0.927373	0.353733	0.691784	729.709	722.828	971.317	1161.07	1043.99	650.862
AT1G17370	1753.6	0.344477	0.192685	1.78777	0.0738125	0.323473	1424.21	1445.66	1766.36	2095.62	2151.13	1638.6
AT1G17380	5476.14	0.290185	0.209757	1.38343	0.166532	0.489059	4279.04	4820.78	5682.52	6857.58	6929.08	4287.81
AT1G17390.1	1.44087	3.18853	3.94752	0.80773	0.419246	NA	0.80012	0	0	7.84507	0	0
AT1G17400	0.965702	-3.12956	3.9437	-0.79356	0.427452	NA	0	5.79421	0	0	0	0
AT1G17410	422.558	0.891863	0.270981	3.29124	0.00099746	0.0221916	228.034	330.27	329.83	623.683	569.706	453.824
AT1G17420	8110.87	0.465786	0.18817	2.47535	0.0133107	0.12145	6200.93	6010.05	8227.57	9085.58	11085.4	8055.69
AT1G17430	60.063	-0.0667516	0.546306	-0.122187	0.902751	0.974691	60.8091	70.9791	52.7001	66.6831	39.29	69.9168
AT1G17440	345.775	0.227302	0.273854	0.830011	0.406532	0.735124	352.053	252.048	351.637	331.454	384.481	402.975
AT1G17450	38.4527	0.136551	0.787091	0.173488	0.862268	0.962508	57.6086	8.69132	43.6139	30.3997	42.0965	48.3062
AT1G17455	81.7143	0.20236	0.584511	0.346204	0.729189	0.912689	135.22	31.1439	61.7863	99.0441	71.564	91.5275
AT1G17460	40.0624	0.512259	0.68797	0.744594	0.456517	0.772063	46.407	29.6953	22.7155	28.4384	67.3544	45.7637
AT1G17470	424.653	-0.325092	0.254176	-1.27901	0.200895	0.53194	524.079	449.776	442.499	317.725	367.643	446.196
AT1G17480	6.35923	-0.138921	2.01753	-0.068857	0.945103	0.987815	13.602	0	6.36035	0	4.20965	13.9834
AT1G17490	170.509	-1.00413	0.341651	-2.93906	0.00329214	0.0496674	269.64	204.97	208.074	115.715	117.87	106.782
AT1G17495.1	1.66581	-3.90579	3.92838	-0.994252	0.3201	NA	0	0	9.99484	0	0	0
AT1G17500	57.395	0.00866317	0.660933	0.0131075	0.989542	0.998265	39.2059	105.02	27.2587	51.9736	42.0965	78.8153
AT1G17510	165.951	0.0710873	0.420592	0.169017	0.865783	0.963634	172.026	96.3288	217.161	117.676	172.596	219.92
AT1G17520	683.756	0.24296	0.229618	1.05811	0.290006	0.630263	696.904	486.714	696.004	777.643	701.608	743.661
AT1G17530	242.401	-0.211769	0.313424	-0.675662	0.499256	0.800475	231.235	274.501	275.312	255.946	166.983	250.429
AT1G17540	1.30751	4.1503	3.94752	1.05137	0.293089	NA	0	0	0	7.84507	0	0
AT1G17545	2.39288	-0.336969	3.4671	-0.0971907	0.922575	0.98156	8.0012	0	0	0	0	6.35607
AT1G17550	343.291	0.0960039	0.292006	0.328774	0.742326	0.917037	348.852	396.179	249.871	329.493	425.174	310.176
AT1G17560	21.8998	-2.60808	1.13808	-2.29166	0.0219254	0.163637	64.8097	15.9341	31.8018	0	11.2257	7.62729
AT1G17570	0	NA	NA	NA	NA	NA	0	0	0	0	0	0
AT1G17580	209.138	0.569972	0.333199	1.71061	0.087154	0.351993	176.827	200.625	127.207	249.081	286.256	214.835
AT1G17590	156.668	0.483112	0.42574	1.13476	0.256477	0.597285	77.6116	155.719	159.009	205.933	119.273	222.463
AT1G17600	20.2091	1.89014	1.01346	1.86504	0.0621756	0.294708	1.60024	12.3127	11.8121	23.5352	49.1126	22.8819
AT1G17610	27.2243	2.50384	1.0003	2.50308	0.0123117	0.116061	12.0018	12.3127	0	43.1479	46.3061	49.5774
AT1G17615	0	NA	NA	NA	NA	NA	0	0	0	0	0	0
AT1G17620	1378.17	0.429291	0.182289	2.355	0.0185227	0.14788	1265.79	1108.87	1149.41	1670.02	1674.04	1400.88
AT1G17630	10.9711	-1.53365	1.42599	-1.0755	0.282152	0.623117	4.80072	1.44855	42.7052	4.90317	5.61286	6.35607
AT1G17640	259.499	-0.000682917	0.380483	-0.00179487	0.998568	0.999626	280.842	316.509	181.724	323.609	140.322	313.99
AT1G17650	133.085	-0.671046	0.434005	-1.54617	0.122063	0.420084	129.619	220.18	139.928	71.5863	143.128	94.0699
AT1G17660	0	NA	NA	NA	NA	NA	0	0	0	0	0	0
AT1G17665	4.3583	-5.30032	2.85655	-1.8555	0.0635249	0.298192	0.80012	25.3497	0	0	0	0
AT1G17670	0	NA	NA	NA	NA	NA	0	0	0	0	0	0
AT1G17680	373.726	0.0597179	0.277154	0.215468	0.829402	0.952195	440.066	274.501	383.438	351.067	378.868	414.416
AT1G17690	225.616	0.793593	0.31096	2.55207	0.0107085	0.107232	164.825	152.098	178.09	228.488	307.304	322.889
AT1G17700	8.5064	0.435488	2.13736	0.20375	0.838549	0.955037	0	21.7283	0	25.4965	0	3.81364
AT1G17710	132.993	-3.21524	0.516771	-6.22178	4.92e-10	1.64e-07	228.034	294.056	198.988	41.1866	28.0643	7.62729
AT1G17720	1093.56	-0.963908	0.18379	-5.24461	1.57e-07	2.41e-05	1545.03	1344.98	1447.43	733.514	775.978	714.423
AT1G17730	744.813	0.11592	0.204733	0.566202	0.571257	0.841077	773.716	661.989	709.634	834.52	707.221	781.797
AT1G17744	1.15079	-2.12127	3.709	-0.571925	0.567373	NA	4.0006	0.724277	0.908622	0	0	1.27121
AT1G17745	264.326	-1.48973	0.356305	-4.18106	2.9e-05	0.00164776	485.673	357.068	327.104	137.289	85.5962	193.225
AT1G17750	28.7695	0.712211	0.819126	0.869477	0.384586	0.718019	28.8043	9.41559	27.2587	36.2835	50.5158	20.3394
AT1G17760	404.468	0.661644	0.308757	2.14293	0.032119	0.206253	436.065	219.456	284.399	495.22	582.335	409.331
AT1G17770	2.66707	-4.58929	3.68883	-1.2441	0.213462	0.547118	16.0024	0	0	0	0	0
AT1G17780	599.463	0.465408	0.24724	1.88241	0.0597804	0.290173	565.685	368.657	576.975	714.882	718.447	652.133
AT1G17790	240.961	0.115527	0.356728	0.323851	0.746051	0.91962	151.223	313.612	228.973	269.674	289.062	193.225
AT1G17800	0	NA	NA	NA	NA	NA	0	0	0	0	0	0
AT1G17810	2.44557	5.04065	3.3648	1.49805	0.13412	0.437493	0	0	0	1.96127	0	12.7121
AT1G17820	117.587	0.466232	0.42566	1.09532	0.273378	0.61451	124.019	71.7034	100.857	153.96	102.435	152.546
AT1G17830	279.332	-1.90303	0.373235	-5.09874	3.42e-07	4.5e-05	584.888	391.834	345.276	119.637	166.983	67.3744
AT1G17840	727.268	0.741794	0.275877	2.68885	0.00716978	0.0833665	468.07	546.104	618.772	741.359	687.576	1301.72
AT1G17850	95.6206	0.936053	0.574156	1.63031	0.103036	0.385932	112.017	52.1479	32.7104	114.734	70.1608	191.953
AT1G17860	244.1	-0.90856	0.393997	-2.30601	0.0211103	0.160163	410.462	332.443	212.618	200.049	217.498	91.5275
AT1G17870	205.116	0.740745	0.307078	2.41224	0.015855	0.136291	171.226	147.752	141.745	256.926	251.176	261.87
AT1G17880	2707.69	-0.160744	0.171841	-0.935423	0.34957	0.687813	2585.99	3285.32	2704.06	2735.97	2472.47	2462.34
AT1G17890	150.146	0.273005	0.436845	0.624949	0.532005	0.819809	74.4112	199.176	134.476	203.972	151.547	137.291
AT1G17900.1	0	NA	NA	NA	NA	NA	0	0	0	0	0	0
AT1G17910	1.66581	-3.90579	3.92838	-0.994252	0.3201	NA	0	0	9.99484	0	0	0
AT1G17920	43.7099	0.572034	0.79449	0.720002	0.471524	0.783914	44.8067	7.96704	52.7001	24.5159	54.7254	77.5441
AT1G17930	160.656	-0.372618	0.46146	-0.807476	0.419392	0.745923	80.8121	231.768	231.699	186.321	129.096	104.24
AT1G17940	147.896	-0.147668	0.536288	-0.275352	0.783046	0.934186	211.232	39.1109	216.252	140.231	144.531	136.02
AT1G17950	0	NA	NA	NA	NA	NA	0	0	0	0	0	0
AT1G17960	5.27162	-1.44473	2.43735	-0.592746	0.553351	0.830736	23.2035	0	0	5.88381	0	2.54243
AT1G17970	1373.13	-0.22384	0.246367	-0.908563	0.363581	0.700312	1264.99	1649.18	1524.67	1543.52	1432.68	823.747
AT1G17980	1523.61	-0.160554	0.197483	-0.812998	0.416219	0.742659	1299.39	1801.28	1724.56	1469.97	1299.38	1547.07
AT1G17990	11.4019	-2.87267	1.24899	-2.29999	0.0214485	0.161681	21.6032	15.9341	22.7155	2.9419	1.40322	3.81364
AT1G18000	3.67509	-1.71495	2.15533	-0.795675	0.426221	0.751531	5.60084	9.41559	1.81724	0	1.40322	3.81364
AT1G18010	6.48773	-2.43057	1.87243	-1.29809	0.194258	0.525529	16.0024	11.5884	5.45173	5.88381	0	0
AT1G18020	158.832	-1.82484	0.389084	-4.69011	2.73e-06	0.000260325	251.238	317.957	173.547	62.7606	81.3865	66.1032
AT1G18030	732.542	-0.1054	0.227252	-0.463802	0.64279	0.877711	638.496	770.63	869.551	761.953	589.351	765.271
AT1G18040	97.836	0.0459305	0.435142	0.105553	0.915937	0.979074	91.2137	109.366	88.1363	88.2571	84.193	125.85
AT1G18050	0	NA	NA	NA	NA	NA	0	0	0	0	0	0
AT1G18060	2440.02	-0.414505	0.205915	-2.01299	0.0441154	0.247125	2654	3107.87	2601.38	1972.06	2653.48	1651.31
AT1G18070	1316.24	0.165786	0.189772	0.873606	0.382333	0.716254	1172.98	1243.58	1304.78	1269.92	1623.52	1282.66
AT1G18075	25.6653	-0.14947	0.858827	-0.17404	0.861834	0.962471	37.6056	21.7283	21.8069	31.3803	8.4193	33.0516
AT1G18080	570.229	-0.433378	0.236845	-1.8298	0.0672801	0.307443	520.878	702.548	742.344	492.278	510.771	452.552
AT1G18090	24.5001	0.207022	1.13324	0.182682	0.855048	0.959776	45.6068	0.724277	21.8069	9.80634	44.9029	24.1531
AT1G18100	2.06655	-3.13995	3.31417	-0.947433	0.343418	NA	9.60144	0	1.81724	0.980634	0	0
AT1G18120	0	NA	NA	NA	NA	NA	0	0	0	0	0	0
AT1G18130	4.68345	-5.40266	2.33887	-2.30994	0.0208914	0.159536	13.602	10.8641	3.63449	0	0	0
AT1G18140	16.1538	-7.18749	3.90899	-1.83871	NA	NA	96.0144	0	0.908622	0	0	0
AT1G18150	390.041	0.132397	0.264237	0.501053	0.616334	0.865669	422.463	399.076	294.394	392.254	453.239	378.822
AT1G18160	847.626	0.0583996	0.220326	0.26506	0.790963	0.937225	954.543	782.943	754.156	864.919	719.85	1009.34
AT1G18170	457.868	0.130248	0.265148	0.491228	0.623265	0.869306	350.453	522.928	437.956	430.498	430.787	574.589
AT1G18180	33.4485	0.0571249	0.71595	0.0797889	0.936405	0.986012	44.0066	21.7283	32.7104	40.206	37.8868	24.1531
AT1G18190	169.316	0.224843	0.335427	0.670318	0.502655	0.802126	181.627	140.51	146.288	179.456	182.418	185.597
AT1G18191	23.5471	-3.16471	1.24187	-2.54835	0.0108234	0.107835	12.0018	107.193	8.1776	8.82571	0	5.08486
AT1G18200	1038.47	0.0877306	0.239079	0.366951	0.713655	0.906438	913.737	1061.07	1044.92	759.011	1080.48	1371.64
AT1G18210	3770.41	-0.329691	0.192669	-1.71117	0.0870491	0.351943	3196.48	4738.22	4663.05	3097.82	3270.9	3656.01
AT1G18220	2.26684	2.72124	3.17275	0.857691	0.391063	NA	0	0	1.81724	1.96127	9.82251	0
AT1G18230	0	NA	NA	NA	NA	NA	0	0	0	0	0	0
AT1G18240.1	0	NA	NA	NA	NA	NA	0	0	0	0	0	0
AT1G18250	3.38986	-3.87704	2.79857	-1.38536	0.165941	0.488582	0	3.62138	15.4466	0	0	1.27121
AT1G18260	277.71	-0.286244	0.291465	-0.982088	0.326057	0.664766	252.038	308.542	355.271	256.926	218.902	274.582
AT1G18265	102.568	0.0313447	0.447514	0.0700419	0.94416	0.987705	76.8115	137.613	89.9536	120.618	105.241	85.1714
AT1G18270	792.996	0.57558	0.262131	2.19577	0.0281083	0.191037	621.693	551.174	737.801	758.03	777.382	1311.89
AT1G18280	2.7543	5.2111	3.62093	1.43916	0.150105	0.46563	0	0	0	0	0	16.5258
AT1G18290	17.4335	0.442028	1.29077	0.342452	0.732011	0.913454	5.60084	29.6953	9.08622	28.4384	0	31.7804
AT1G18300	3786.07	-0.538975	0.22101	-2.43869	0.0147405	0.129782	4058.21	5857.22	3539.08	3068.4	3690.46	2503.02
AT1G18310	13.8828	0.0338227	1.4233	0.0237636	0.981041	0.9961	24.8037	0	16.3552	5.88381	7.01608	29.2379
AT1G18320	13.5347	0.840975	1.36231	0.617315	0.537027	0.822079	0	18.1069	10.9035	6.86444	22.4515	22.8819
AT1G18330	167.778	-0.968705	0.345856	-2.80089	0.00509618	0.0669816	221.633	207.867	236.242	91.199	127.693	122.037
AT1G18335	434.251	0.29451	0.249992	1.17808	0.238765	0.57683	388.858	348.377	433.413	520.717	514.98	399.161
AT1G18340	267.68	-0.00822834	0.347202	-0.023699	0.981093	0.9961	351.253	157.892	296.211	244.178	294.675	261.87
AT1G18350	2.21041	-0.684647	3.57243	-0.191647	0.848018	NA	0	0	8.1776	0	0	5.08486
AT1G18360	162.562	-0.452372	0.371698	-1.21704	0.223589	0.55888	176.026	210.764	176.273	125.521	183.821	102.968
AT1G18370	4.99085	-2.47993	2.51442	-0.986283	0.323994	0.66258	0	0	25.4414	1.96127	0	2.54243
AT1G18382	2.30098	-0.806269	2.31219	-0.348703	0.727312	NA	2.40036	3.62138	2.72587	0.980634	2.80643	1.27121
AT1G18390	951.149	-0.15506	0.188143	-0.824164	0.409846	0.73848	954.543	979.222	1073.08	887.474	862.978	949.597
AT1G18400	263.971	0.501128	0.424142	1.18151	0.2374	0.575293	205.631	160.789	289.85	322.629	133.306	471.621
AT1G18410	5.13816	-0.789612	1.91187	-0.413005	0.679603	0.891659	9.60144	0	9.99484	5.88381	2.80643	2.54243
AT1G18415	14.7832	-1.01682	1.06179	-0.957651	0.338239	0.677281	32.8049	10.1399	16.3552	6.86444	9.82251	12.7121
AT1G18420	0	NA	NA	NA	NA	NA	0	0	0	0	0	0
AT1G18430	0	NA	NA	NA	NA	NA	0	0	0	0	0	0
AT1G18440	256.69	-0.498122	0.29632	-1.68103	0.0927573	0.364541	363.254	257.842	280.764	217.701	200.66	219.92
AT1G18450	893.839	0.217119	0.216453	1.00308	0.315823	0.655639	1007.35	734.416	737.801	868.842	1024.35	990.276
AT1G18460	1242.3	0.703189	0.263065	2.67307	0.00751609	0.0860557	926.539	929.247	979.494	915.912	1671.23	2031.4
AT1G18470	2074.38	0.829515	0.195936	4.23359	2.3e-05	0.00138446	1558.63	1289.94	1632.79	2136.8	2887.82	2940.32
[truncated: 31,611 more rows]
