# Supplementary material for: Companion cells with high florigen production express other small proteins and reveal a nitrogen-sensitive FT repressor
Source: bioRxiv preprint, doi:10.1101/2024.08.17.608367, version 2 (2025-08-08)
Supplement: Supplemental data 3 [file 608367_file05.xlsx]

## Sheet: DataS3_35Sc_v_CABc
Row.names	baseMean	log2FoldChange	lfcSE	stat	pvalue	padj	35S_C1.counts	35S_C2.counts	35S_C3.counts	CAB2_C1.counts	CAB2_C2.counts	CAB2_C3.counts
AT1G01010	80.1577	2.01628	0.880553	2.28979	0.0220337	0.245797	16.6571	37.736	40.8692	249.92	120.9	14.8634
AT1G01020	1622.81	0.237665	0.231276	1.02762	0.304126	0.776093	1663.86	1330.82	1473.39	1665.75	2092.25	1510.83
AT1G01030	373.654	0.687696	0.378388	1.81744	0.0691503	0.435164	306.305	236.479	316.474	453.983	292.176	636.505
AT1G01040	752.977	-0.195408	0.288551	-0.677204	0.498276	0.889347	956.856	718.661	735.645	703.903	864.215	538.581
AT1G01046	0	NA	NA	NA	NA	NA	0	0	0	0	0	0
AT1G01050	2084.64	0.216672	0.197489	1.09714	0.272582	0.752935	1899.83	2062.9	1822.35	2320.36	2073.22	2329.19
AT1G01060	167.153	-1.16497	0.455121	-2.55968	0.0104767	0.153673	213.766	255.766	224.256	116.935	67.1669	125.028
AT1G01070	2.64237	-4.78915	3.92248	-1.22095	0.222105	NA	14.8063	0	1.04793	0	0	0
AT1G01073	0.727443	1.76576	3.98756	0.442817	0.657898	NA	0.925392	0	0	3.43926	0	0
AT1G01080	413.502	0.173284	0.386296	0.448579	0.653736	0.941209	548.758	233.963	383.541	523.915	341.432	449.401
AT1G01090	1175.27	-0.0577915	0.316891	-0.18237	0.855292	0.980008	1131.75	1418.87	1045.83	1451.37	658.236	1345.58
AT1G01100	1351.42	-0.229217	0.344286	-0.665776	0.505554	0.891615	1178.02	1617.62	1580.27	1639.38	603.383	1489.84
AT1G01110	20.3466	-1.75861	1.88193	-0.934475	0.350059	0.813615	87.9123	0	6.28756	0	23.5084	4.3716
AT1G01115	0.932874	3.43642	3.95641	0.868571	0.385082	NA	0	0	0	0	5.59725	0
AT1G01120	894.962	0.256971	0.292505	0.878519	0.379662	0.830457	887.451	694.342	864.54	1311.51	733.239	878.692
AT1G01130	660.669	0.405687	0.4094	0.990929	0.32172	0.793482	476.577	755.558	472.615	421.883	1271.69	565.685
AT1G01140	10573.6	0.278926	0.209388	1.3321	0.182827	0.650793	9897.07	9649.51	9116.97	9510.71	14590.9	10676.3
AT1G01150	12.8159	-1.05086	1.61518	-0.650614	0.515296	0.894773	17.5825	9.22435	25.1503	0	10.075	14.8634
AT1G01160	1230.17	0.0467384	0.240031	0.194718	0.845614	0.978842	1372.36	1220.13	1038.5	1084.51	1232.51	1433.01
AT1G01170	2313.14	-0.199546	0.305509	-0.65316	0.513653	0.894429	2418.05	2748.02	2253.04	2377.68	1165.35	2916.73
AT1G01180	382.885	-0.467577	0.345282	-1.35419	0.175675	0.638662	506.19	467.926	359.439	251.066	300.012	412.679
AT1G01183	2.31348	-4.59765	3.9247	-1.17146	0.241412	NA	13.8809	0	0	0	0	0
AT1G01190	5.50678	4.99972	2.72624	1.83393	0.0666651	0.428132	0	0	1.04793	1.14642	1.11945	29.7269
AT1G01200	0	NA	NA	NA	NA	NA	0	0	0	0	0	0
AT1G01210	308.53	-0.146679	0.385764	-0.38023	0.703775	0.954568	365.53	363.104	244.167	285.459	208.218	384.701
AT1G01220	368.423	-0.20886	0.32235	-0.647928	0.517032	0.89576	448.815	401.679	334.289	394.369	327.999	303.389
AT1G01225	16.5937	-1.08682	1.76078	-0.617236	0.537079	0.903661	0	64.5705	3.14378	2.29284	11.1945	18.3607
AT1G01230	786.954	0.32371	0.278156	1.16377	0.244517	0.72367	596.878	742.141	757.652	1061.59	883.245	680.221
AT1G01240	1774.76	0.0794211	0.250745	0.316741	0.75144	0.961893	1782.31	1744.24	1650.49	1772.37	2347.48	1351.7
AT1G01250	32.5614	-1.61662	1.54692	-1.04505	0.295999	0.771336	49.9712	46.9603	50.3005	0	48.1363	0
AT1G01260	723.622	-0.0642973	0.355158	-0.181039	0.856337	0.980008	541.354	799.164	878.163	852.938	873.17	396.941
AT1G01270	0.634802	-1.27338	3.9981	-0.318497	0.750108	NA	1.85078	0.838577	0	0	1.11945	0
AT1G01280	0	NA	NA	NA	NA	NA	0	0	0	0	0	0
AT1G01290	1082.26	0.0952316	0.279341	0.340915	0.733168	0.958663	1303.88	900.632	934.751	1039.8	1418.34	896.178
AT1G01300	342.254	-0.814612	0.404284	-2.01495	0.0439098	0.345855	455.293	464.572	388.781	389.783	180.231	174.864
AT1G01305	5.46673	-0.0904939	2.63014	-0.0344065	0.972553	0.996461	0.925392	15.933	0	11.4642	4.4778	0
AT1G01310	20.8572	0.283323	1.43946	0.196826	0.843964	0.978413	0	38.5746	17.8148	27.5141	24.6279	16.6121
AT1G01320	3286.56	0.0994699	0.246853	0.402952	0.686984	0.949751	3655.3	2993.72	2870.27	2993.31	4522.57	2684.16
AT1G01340	55.4043	0.263892	1.01872	0.259042	0.795603	0.971421	93.4646	4.19289	53.4443	21.782	109.706	49.8362
AT1G01350	369.308	0.0396968	0.3655	0.10861	0.913512	0.989493	268.364	490.568	333.241	434.494	396.285	292.897
AT1G01355	41.4175	0.14421	1.29269	0.111558	0.911174	0.989323	59.2251	41.9289	16.7668	30.9534	99.631	0
AT1G01360	404.757	1.25377	0.458614	2.73382	0.00626043	0.108964	223.945	167.715	325.905	615.628	849.662	245.684
AT1G01370	21.8316	-0.831899	1.18078	-0.704532	0.481101	0.885701	14.8063	59.539	9.43135	11.4642	23.5084	12.2405
AT1G01380	0.868179	0.590759	3.93923	0.149968	0.88079	NA	0	0	2.09585	0	2.2389	0.87432
AT1G01390	51.9545	0.326456	0.906074	0.360297	0.718625	0.957581	87.9123	20.1259	30.3899	17.1963	66.0475	90.055
AT1G01400	1.4926	4.11645	3.93783	1.04536	0.295856	NA	0	0	0	0	8.95559	0
AT1G01410	0.37315	2.10723	4.03022	0.522856	0.601075	NA	0	0	0	0	2.2389	0
AT1G01420	274.118	-0.818699	0.38165	-2.14516	0.0319402	0.298305	432.158	238.156	379.35	199.477	209.337	186.23
AT1G01430	4447.47	-0.261849	0.241134	-1.08591	0.27752	0.75838	4657.5	5231.05	4662.23	2828.22	4166.59	5139.25
AT1G01440	639.19	-0.109832	0.252031	-0.435786	0.662992	0.943998	666.282	677.571	646.571	585.821	658.236	600.658
AT1G01448	851.636	0.607209	0.340738	1.78204	0.0747424	0.452161	535.802	663.315	825.767	866.695	1533.65	684.593
AT1G01450	0	NA	NA	NA	NA	NA	0	0	0	0	0	0
AT1G01453	8.2265	0.393747	2.57077	0.153163	0.878269	0.983451	0	10.9015	10.4793	0	0	27.9782
AT1G01460	258.165	-0.484222	0.613002	-0.789919	0.429575	0.860712	86.9869	260.798	555.402	192.599	344.79	108.416
AT1G01470	19710	0.782027	0.222078	3.52141	0.000429251	0.0178437	11523.9	15314.1	16647.4	29459.6	19698.9	25615.8
AT1G01471	3.02873	-1.16941	3.79752	-0.307939	0.758128	NA	0	0	12.5751	0	5.59725	0
AT1G01480	145.8	-0.1183	0.611566	-0.193437	0.846617	0.979397	266.513	103.145	85.9301	83.6888	110.825	224.7
AT1G01490	2878.42	0.195857	0.23909	0.819174	0.412687	0.852433	2945.52	2546.76	2556.94	3177.88	3801.65	2241.76
AT1G01500	513.057	0.249296	0.361871	0.688907	0.490882	0.887319	523.772	483.859	398.212	697.024	661.594	313.881
AT1G01510	294.962	0.307279	0.420611	0.730554	0.465052	0.878134	194.332	321.175	275.605	188.013	416.435	374.209
AT1G01520	252.085	0.907448	0.393716	2.30483	0.0211762	0.239858	177.675	180.294	167.668	385.198	383.971	217.706
AT1G01530	4.17202	0.476325	3.60308	0.132199	0.894827	0.986203	0	0	10.4793	0	14.5528	0
AT1G01540	907.98	0.261101	0.282885	0.922991	0.356012	0.816394	644.073	976.943	857.205	1105.15	756.748	1107.76
AT1G01550	7187.21	-0.0896791	0.177946	-0.503967	0.614285	0.930995	7035.76	7494.37	7701.22	6636.63	7711.88	6543.41
AT1G01560	169.931	-0.983109	0.480151	-2.0475	0.040609	0.333468	231.348	280.923	164.525	161.645	80.6003	100.547
AT1G01570	58.6711	1.22391	0.787008	1.55514	0.119913	0.550993	31.4633	17.6101	56.5881	135.278	48.1363	62.9511
AT1G01580	0.433758	-2.19231	4.00082	-0.547965	0.583716	NA	0.925392	1.67715	0	0	0	0
AT1G01590	4.00219	-0.475266	3.18205	-0.149358	0.881271	0.984155	5.55235	8.38577	0	0	10.075	0
AT1G01600	5.13425	2.87426	3.33395	0.86212	0.388621	0.835028	3.70157	0	0	0	0	27.1039
AT1G01610	291.79	0.409543	0.455168	0.899763	0.368246	0.824622	195.258	208.806	347.912	529.647	213.815	255.301
AT1G01620	7136.66	0.571443	0.211814	2.69785	0.00697882	0.117966	4742.64	6612.18	5869.44	7193.8	9790.7	8611.18
AT1G01630	632.198	0.334003	0.256398	1.30268	0.192686	0.662377	590.4	545.914	541.778	740.588	639.205	735.303
AT1G01640	20.1071	1.2806	1.50424	0.85133	0.394586	0.839044	6.47775	19.2873	9.43135	0	26.8668	58.5795
AT1G01650	1277.94	1.10013	0.373437	2.94597	0.0032194	0.0719057	683.865	785.747	969.333	2962.35	934.74	1331.59
AT1G01660	12.3952	0.90088	2.32722	0.387106	0.698678	0.952485	25.911	0	0	13.7571	34.7029	0
AT1G01670	37.0933	2.97977	1.21973	2.44298	0.0145666	0.190802	7.40314	0	17.8148	106.617	19.0306	71.6943
AT1G01680	21.5199	0.92933	2.13974	0.434319	0.664057	0.944278	44.4188	0	0	79.1031	5.59725	0
AT1G01690	18.8522	-2.11725	1.74382	-1.21414	0.224693	0.703356	9.25392	46.9603	35.6295	0	21.2695	0
AT1G01695	3.92572	1.31737	3.23556	0.407154	0.683895	0.948647	0	6.70862	0	2.29284	14.5528	0
AT1G01700	39.9171	0.285487	1.14207	0.249974	0.802608	0.9727	60.1505	1.67715	46.1088	84.8352	25.7473	20.9837
AT1G01710	787.067	0.325261	0.30251	1.07521	0.282283	0.761314	770.852	600.421	725.166	1069.61	583.233	973.118
AT1G01720	8183.96	0.397019	0.256607	1.54719	0.121818	0.554304	4775.02	7536.3	8884.33	8571.79	7893.24	11443.1
AT1G01725	715.609	0.00377481	0.356482	0.010589	0.991551	0.998432	682.014	581.134	881.307	394.369	970.562	784.265
AT1G01730	751.171	0.41715	0.359521	1.1603	0.245928	0.724784	353.5	689.311	887.595	636.264	959.368	980.987
AT1G01740	102.22	-0.126823	0.548412	-0.231255	0.817117	0.976432	89.763	131.657	98.5052	132.985	81.7198	78.6888
AT1G01750	98.4725	0.019831	0.616381	0.0321732	0.974334	0.996571	156.391	77.1491	59.7319	76.8102	137.692	83.0604
AT1G01760	167.625	0.636393	0.458037	1.38939	0.164713	0.621943	135.107	135.85	122.608	160.499	289.937	161.749
AT1G01770	1039.98	0.117058	0.281534	0.415786	0.677567	0.947438	985.543	1118.66	889.69	1006.56	803.764	1435.63
AT1G01780	347.776	-0.581338	0.458052	-1.26915	0.204386	0.675544	509.891	481.343	258.838	448.251	236.204	152.132
AT1G01790	1317.85	0.0399941	0.255877	0.156302	0.875795	0.983329	1401.97	1005.45	1492.25	1170.5	1252.66	1584.27
AT1G01800	1361.87	-0.118579	0.233813	-0.507155	0.612046	0.930523	1444.54	1217.61	1591.8	1403.22	1111.61	1402.41
AT1G01810	59.166	0.728474	0.841018	0.86618	0.386391	0.834264	49.9712	56.1847	27.2461	57.3211	143.289	20.9837
AT1G01820	458.831	0.151644	0.290168	0.522609	0.601247	0.927204	436.785	421.804	445.369	507.865	532.858	408.308
AT1G01830	452.264	-0.933984	0.437341	-2.13559	0.0327126	0.30185	744.941	559.331	477.855	182.281	207.098	542.079
AT1G01840	117.792	0.276263	0.537822	0.513671	0.607482	0.929132	99.017	76.3105	144.614	88.2745	145.528	153.006
AT1G01860	123.512	0.874882	0.488033	1.79267	0.0730259	0.447027	69.4044	82.1806	110.032	171.963	154.484	153.006
AT1G01870	0	NA	NA	NA	NA	NA	0	0	0	0	0	0
AT1G01880	19.5177	-1.78715	1.66375	-1.07417	0.282747	0.761511	1.85078	51.1532	37.7254	0	24.6279	1.74864
AT1G01890	1.1181	-3.55438	3.94364	-0.901295	0.367432	NA	0	6.70862	0	0	0	0
AT1G01900	20.3319	1.88024	1.80811	1.03989	0.298391	0.772912	0	25.9959	0	11.4642	6.71669	77.8145
AT1G01910	786.342	0.797146	0.251104	3.17457	0.00150059	0.0425413	533.026	673.378	516.628	974.458	1014.22	1006.34
AT1G01920	221.361	-0.642006	0.43187	-1.48657	0.137127	0.581149	373.858	212.16	223.209	223.552	151.126	144.263
AT1G01930	189.754	-0.105655	0.467399	-0.226049	0.821163	0.977013	235.975	122.432	231.592	215.527	207.098	125.902
AT1G01940	246.36	0.0939681	0.409895	0.229249	0.818675	0.976836	198.959	299.372	216.921	210.942	204.859	347.105
AT1G01950	861.555	0.492383	0.243035	2.02598	0.042767	0.339964	741.239	734.594	671.722	928.601	1154.15	939.02
AT1G01960	183.792	-0.197895	0.506391	-0.390795	0.695949	0.951858	262.811	139.204	187.579	99.7387	151.126	262.296
AT1G01970	165.199	-0.298563	0.498707	-0.598673	0.549391	0.908507	123.077	184.487	238.927	206.356	142.17	96.1752
AT1G01980	2.46771	-4.69073	3.92358	-1.19552	0.231883	NA	14.8063	0	0	0	0	0
AT1G01990	492.053	0.209807	0.296499	0.707616	0.479184	0.885109	438.636	386.584	543.874	570.918	546.291	466.013
AT1G02000	241.776	0.406445	0.508085	0.799956	0.423736	0.858695	182.302	162.684	278.749	220.113	471.288	135.52
AT1G02010	359.427	-0.0667608	0.407362	-0.163886	0.869821	0.982418	532.101	267.506	303.899	226.991	398.524	427.543
AT1G02020	370.104	0.660698	0.38724	1.70617	0.087976	0.484431	243.378	203.774	413.931	342.78	466.81	549.947
AT1G02030	18.707	-0.615383	1.69137	-0.363837	0.71598	0.957581	48.1204	16.7715	3.14378	0	2.2389	41.9674
AT1G02040	0	NA	NA	NA	NA	NA	0	0	0	0	0	0
AT1G02050	52.4022	-0.497626	1.16124	-0.428529	0.668266	0.945406	69.4044	47.7989	67.0674	0	31.3446	98.7982
AT1G02060	20.0426	-2.41851	1.67004	-1.44817	0.147569	0.600861	33.3141	17.6101	50.3005	0	19.0306	0
AT1G02065	9.20697	-3.97584	2.24755	-1.76897	0.0768989	0.458054	5.55235	45.2832	1.04793	0	3.35835	0
AT1G02070	3.08464	-5.01259	3.92023	-1.27865	0.201021	NA	18.5078	0	0	0	0	0
AT1G02074	0	NA	NA	NA	NA	NA	0	0	0	0	0	0
AT1G02080	364.381	0.450574	0.371876	1.21163	0.225656	0.704889	410.874	253.25	259.886	450.544	301.132	510.603
AT1G02090	765.58	0.361209	0.280292	1.28869	0.197507	0.668786	753.269	720.338	536.539	801.349	1046.68	735.303
AT1G02100	2163.48	0.083633	0.236775	0.353217	0.723926	0.957972	2030.31	2068.77	2202.74	2109.42	2828.85	1740.77
AT1G02110	200.763	-0.772758	0.444076	-1.74015	0.0818331	0.470594	269.289	261.636	228.448	154.767	200.381	90.055
AT1G02120	1496.67	-0.0753485	0.239713	-0.314329	0.753272	0.962079	1846.16	1303.99	1457.67	1310.36	1381.4	1680.44
AT1G02130	1021.42	-0.0854363	0.273576	-0.312295	0.754816	0.96298	987.393	1145.5	1022.78	771.542	893.32	1307.98
AT1G02136	3.66775	-5.25995	3.91811	-1.34247	0.179443	NA	0	0	22.0065	0	0	0
AT1G02140	3051.84	0.123182	0.224894	0.547736	0.583873	0.921591	2468.95	3716.58	2578.95	2996.75	3255.36	3294.44
AT1G02145	1017.58	-0.0514091	0.222699	-0.230846	0.817435	0.976535	1108.62	981.974	1016.49	995.094	1023.18	980.113
AT1G02150	959.685	0.294775	0.258303	1.1412	0.253787	0.732778	682.014	1051.58	851.965	1110.88	1070.19	991.479
AT1G02160	613.434	0.476057	0.353035	1.34847	0.177508	0.641522	651.476	390.777	497.766	625.946	492.558	1022.08
AT1G02170	1176.47	0.0749861	0.237719	0.31544	0.752427	0.961893	959.632	1107.76	1370.69	1214.06	1184.38	1222.3
AT1G02180	44.4553	1.43395	1.39063	1.03116	0.302468	0.774798	33.3141	0	38.7733	110.056	82.8392	1.74864
AT1G02190	4.84389	-0.758765	2.01177	-0.377163	0.706052	0.955449	4.62696	4.19289	9.43135	4.58569	4.4778	1.74864
AT1G02205	35.0835	-0.0834608	1.28782	-0.0648077	0.948327	0.993197	49.0458	36.0588	23.0544	67.6389	34.7029	0
AT1G02210	0.154232	-0.806974	4.08047	-0.197765	0.843229	NA	0.925392	0	0	0	0	0
AT1G02220	146.44	0.411549	0.557407	0.738327	0.460316	0.87667	139.734	98.1136	139.374	236.163	69.4058	195.848
AT1G02228.1	8.45075	1.15554	2.91558	0.396333	0.69186	0.950996	15.7317	0	0	0	0	34.9728
AT1G02230	2.31348	-4.59765	3.9247	-1.17146	0.241412	NA	13.8809	0	0	0	0	0
AT1G02250	0.559725	2.69612	3.98931	0.675836	0.499145	NA	0	0	0	0	3.35835	0
AT1G02260	418.655	-0.361838	0.393187	-0.920271	0.357431	0.817269	642.222	283.439	487.286	254.506	446.66	397.816
AT1G02270	1765.71	0.358763	0.245298	1.46256	0.143587	0.592967	1263.16	1755.98	1622.19	1954.65	2387.78	1610.5
AT1G02280	784.216	-0.380388	0.437434	-0.869589	0.384525	0.833346	584.848	1139.63	935.799	1076.49	709.731	258.799
AT1G02290	47.5835	0.27703	0.866874	0.319574	0.749292	0.961584	28.6872	41.9289	58.6839	45.8569	16.7917	93.5523
AT1G02300	2374.32	0.220139	0.320084	0.687753	0.491608	0.88767	2431.01	1975.69	2174.45	1258.77	3117.67	3288.32
AT1G02305	1104.41	0.270513	0.235928	1.14659	0.25155	0.73103	979.99	1116.15	907.505	1076.49	1175.42	1370.93
AT1G02310	43.1944	0.38205	0.99376	0.384449	0.700646	0.953141	22.2094	54.5075	35.6295	80.2495	60.4502	6.12024
AT1G02320	1.25854	-0.338399	3.87158	-0.0874059	0.930349	NA	0	4.19289	0	0	3.35835	0
AT1G02330	448.068	0.436516	0.313318	1.39321	0.163558	0.621943	331.29	369.813	441.177	514.743	613.458	417.925
AT1G02335	1.73978	1.57623	3.85975	0.408377	0.682997	NA	0.925392	1.67715	0	0	7.83614	0
AT1G02340	1109.75	-0.493312	0.341316	-1.44533	0.148366	0.602328	1359.4	1366.04	1168.44	505.572	849.662	1409.4
AT1G02350	316.325	0.117704	0.410774	0.286541	0.774464	0.965509	198.959	446.962	264.078	267.116	413.077	307.761
AT1G02360	37.8723	-1.8708	1.14736	-1.63052	0.102992	0.516214	61.0759	71.2791	46.1088	28.6605	0	20.1094
AT1G02370	36.3448	0.357362	1.42273	0.25118	0.801675	0.972612	3.70157	13.4172	78.5946	0	71.6447	50.7106
AT1G02380	310.672	0.367488	0.382062	0.961854	0.336123	0.805676	330.365	187.003	296.563	350.805	426.51	272.788
AT1G02390	1374.31	-0.490392	0.323328	-1.5167	0.129342	0.566746	1876.7	1369.4	1570.84	684.414	1704.92	1039.57
AT1G02391	1.12844	3.71133	3.94784	0.940092	0.34717	NA	0	0	0	2.29284	4.4778	0
AT1G02400	2935.52	0.15837	0.296125	0.534807	0.592783	0.924297	2261.66	3870.03	2191.22	4233.73	2317.26	2739.25
AT1G02405	29.61	0.442943	1.0736	0.412579	0.679915	0.948031	29.6126	10.0629	35.6295	69.9317	12.3139	20.1094
AT1G02410	928.818	-0.0660124	0.263825	-0.250212	0.802423	0.9727	909.661	827.676	1112.9	1102.86	789.212	830.604
AT1G02420	5.57541	-0.545632	1.99381	-0.273663	0.784344	0.967552	1.85078	11.7401	6.28756	4.58569	1.11945	7.86888
AT1G02430	36.0627	-1.48446	0.933035	-1.591	0.11161	0.534826	29.6126	51.1532	78.5946	10.3178	33.5835	13.1148
AT1G02440	13.8299	2.29945	1.77181	1.29779	0.194358	0.664826	3.70157	9.22435	1.04793	0	15.6723	53.3335
AT1G02450	5.26295	4.00611	3.32989	1.20308	0.228947	0.705871	1.85078	0	0	0	0	29.7269
AT1G02460	0.462696	-2.27699	3.99552	-0.569887	0.568755	NA	2.77618	0	0	0	0	0
AT1G02470	135.222	-1.36695	0.77235	-1.76986	0.0767511	0.457948	246.154	227.254	111.08	11.4642	169.037	46.339
AT1G02475	1853.83	0.0281957	0.219422	0.1285	0.897754	0.986967	1695.32	1887.64	1923.99	1674.92	2226.58	1714.54
AT1G02480	0	NA	NA	NA	NA	NA	0	0	0	0	0	0
AT1G02490	0	NA	NA	NA	NA	NA	0	0	0	0	0	0
AT1G02500	4887.13	0.17523	0.229347	0.764039	0.444844	0.869076	4207.76	4913.23	4651.75	5370.98	3798.29	6380.79
AT1G02510	1.74596	-1.07167	3.84566	-0.27867	0.780498	NA	1.85078	0	5.23964	1.14642	2.2389	0
AT1G02520	0.503541	-2.3878	3.98903	-0.598591	0.549446	NA	0.925392	0	2.09585	0	0	0
AT1G02530	0	NA	NA	NA	NA	NA	0	0	0	0	0	0
AT1G02540	0	NA	NA	NA	NA	NA	0	0	0	0	0	0
AT1G02550	0	NA	NA	NA	NA	NA	0	0	0	0	0	0
AT1G02560	2183.01	0.415699	0.225775	1.8412	0.0655916	0.4244	1509.31	2031.03	2071.75	2766.32	2168.37	2551.27
AT1G02570	0	NA	NA	NA	NA	NA	0	0	0	0	0	0
AT1G02575	2.31348	-4.59765	3.9247	-1.17146	0.241412	NA	13.8809	0	0	0	0	0
AT1G02580	0.14572	1.11658	4.08047	0.27364	0.784361	NA	0	0	0	0	0	0.87432
AT1G02590	10.6691	-0.495221	1.81965	-0.272151	0.785506	0.967552	2.77618	29.3502	5.23964	1.14642	24.6279	0.87432
AT1G02600	0	NA	NA	NA	NA	NA	0	0	0	0	0	0
AT1G02610	6864.34	-0.0395768	0.283491	-0.139605	0.888972	0.985386	6747.03	7687.24	6440.56	4908.98	10378.4	5023.84
AT1G02620	697.235	0.642826	0.420855	1.52743	0.126655	0.56247	237.826	525.788	869.78	1108.59	825.034	616.396
AT1G02630	0	NA	NA	NA	NA	NA	0	0	0	0	0	0
AT1G02640	546.57	0.366409	0.354242	1.03435	0.300973	0.774178	297.051	666.669	468.424	638.557	708.611	500.111
AT1G02650	72.3374	1.11402	0.678765	1.64125	0.100745	0.51142	73.106	28.5116	35.6295	72.2246	95.1532	129.399
AT1G02660	3935.75	-0.0934435	0.257411	-0.363013	0.716596	0.957581	3795.96	4446.98	3946.49	2562.25	5097.97	3764.82
AT1G02670	56.3615	0.874135	0.685607	1.27498	0.202317	0.67408	27.7618	44.4446	47.1567	79.1031	75.0031	64.6997
AT1G02680	1286.47	0.123655	0.219071	0.564449	0.572449	0.918657	1202.08	1281.35	1210.36	1514.42	1243.71	1266.89
AT1G02681	11.9866	1.50082	1.96371	0.764275	0.444704	0.868966	0	0	18.8627	16.0499	21.2695	15.7378
AT1G02690	28.1861	0.0706244	1.55786	0.0453343	0.963841	0.995442	1.85078	80.5034	0	53.8818	22.389	10.4918
AT1G02700	3.08464	-5.01259	3.92023	-1.27865	0.201021	NA	18.5078	0	0	0	0	0
AT1G02710	3.95494	-0.983015	3.28345	-0.299385	0.764646	0.964303	15.7317	0	0	6.87853	1.11945	0
AT1G02720	87.4381	1.75773	0.65593	2.67974	0.00736783	0.122363	20.3586	59.539	39.8212	104.324	102.989	197.596
AT1G02730	64.2849	-1.63669	2.93423	-0.557793	0.576986	0.921176	0	241.51	50.3005	89.4209	4.4778	0
AT1G02740	170.578	-0.247904	0.464145	-0.53411	0.593266	0.924297	253.557	137.527	164.525	123.814	193.665	150.383
AT1G02750	497.264	0.563582	0.282898	1.99217	0.0463522	0.357861	347.022	429.352	427.554	627.093	607.861	544.701
AT1G02760	0	NA	NA	NA	NA	NA	0	0	0	0	0	0
AT1G02770	29.5655	0.607829	1.29594	0.469024	0.639053	0.935915	24.0602	46.1218	0	25.2213	47.0169	34.9728
AT1G02780	3500.83	0.191876	0.248742	0.771385	0.440479	0.867438	2722.5	3703.16	3379.57	4474.48	2627.35	4097.94
AT1G02790	1.63357	-0.832985	3.84683	-0.216538	0.828568	NA	4.62696	1.67715	0	0	0	3.49728
AT1G02800	0.591392	1.41155	4.00972	0.352032	0.724815	NA	0.925392	0	0	0	0	2.62296
AT1G02810	0	NA	NA	NA	NA	NA	0	0	0	0	0	0
AT1G02813	0	NA	NA	NA	NA	NA	0	0	0	0	0	0
AT1G02816	734.413	-0.330633	0.316681	-1.04406	0.29646	0.771773	501.563	991.199	961.997	613.336	645.922	692.462
AT1G02820	522.825	-0.313546	0.32933	-0.952073	0.34106	0.808897	738.463	483.859	515.58	607.603	404.121	387.324
AT1G02830	0	NA	NA	NA	NA	NA	0	0	0	0	0	0
AT1G02840	2344.7	-0.0829655	0.273132	-0.303756	0.761314	0.964303	2834.48	2093.09	2308.58	3093.05	1575.06	2163.94
AT1G02850	1518.75	-0.823691	0.25866	-3.18446	0.00145025	0.0414988	2370.85	1707.34	1744.8	1241.57	831.751	1216.18
AT1G02860	1330.53	0.556117	0.229858	2.41939	0.0155466	0.197881	1103.07	1044.87	1083.56	1423.86	1897.47	1430.39
AT1G02870	83.9805	-1.03682	0.841328	-1.23236	0.217814	0.694855	143.436	157.653	37.7254	9.17137	85.0781	70.8199
AT1G02880	1507.58	0.654492	0.272546	2.4014	0.0163323	0.202131	1062.35	1030.61	1420.99	2070.44	2170.61	1290.5
AT1G02890	388.053	-0.234876	0.4205	-0.558564	0.57646	0.921087	635.744	306.081	316.474	376.026	470.169	223.826
AT1G02900	66.1074	-0.101785	0.720838	-0.141204	0.887709	0.985284	113.823	36.8974	54.4922	82.5423	66.0475	42.8417
AT1G02910	1306.53	0.0114031	0.256709	0.0444205	0.964569	0.995442	1335.34	1272.96	1295.24	1222.09	1699.32	1014.21
AT1G02920	2465.95	-1.05568	0.349535	-3.02023	0.00252579	0.0617549	4204.06	2999.59	2786.44	2201.13	714.208	1890.28
AT1G02930	3317.48	-0.560507	0.267693	-2.09384	0.0362738	0.317002	4080.05	3871.71	3909.82	3717.84	1749.7	2575.75
AT1G02940	5.72691	-0.0644483	2.91497	-0.0221095	0.982361	0.996915	1.85078	0	15.7189	0	16.7917	0
AT1G02950	0	NA	NA	NA	NA	NA	0	0	0	0	0	0
AT1G02952	0	NA	NA	NA	NA	NA	0	0	0	0	0	0
AT1G02960	996.923	0.225354	0.286878	0.785538	0.432138	0.861937	1172.47	728.724	856.157	1057	1316.47	850.714
AT1G02965	0.308464	-1.69267	4.03906	-0.419074	0.675162	NA	1.85078	0	0	0	0	0
AT1G02970	32.001	-1.10094	1.38237	-0.796417	0.42579	0.859264	5.55235	72.1177	53.4443	0	14.5528	46.339
AT1G02980	4.20409	-1.46762	3.58276	-0.409634	0.682074	0.94816	18.5078	0	0	0	6.71669	0
AT1G02990	204.486	0.162833	0.405932	0.401135	0.688321	0.950159	182.302	161.845	234.736	216.674	252.995	178.361
AT1G03000	605.396	-0.00148852	0.268588	-0.00554202	0.995578	0.9994	627.416	559.331	630.852	581.236	538.455	695.085
AT1G03010	0	NA	NA	NA	NA	NA	0	0	0	0	0	0
AT1G03020	8.27351	0.689713	2.3011	0.299732	0.764381	0.964303	1.85078	10.9015	6.28756	0	0	30.6012
AT1G03022	0	NA	NA	NA	NA	NA	0	0	0	0	0	0
AT1G03030	629.557	0.381914	0.319693	1.19463	0.232232	0.709857	628.341	374.006	638.188	832.302	563.083	741.424
AT1G03040	611.953	-0.0508387	0.299839	-0.169553	0.865362	0.982004	469.174	599.583	799.569	604.164	649.28	549.947
AT1G03050	9.83294	-1.62554	1.9507	-0.833311	0.404669	0.84723	9.25392	35.2203	0	9.17137	4.4778	0.87432
AT1G03055	264.68	-0.988289	0.420959	-2.34771	0.0188894	0.223175	372.933	313.628	368.87	270.555	138.812	123.279
AT1G03060	160.069	-0.269393	0.811903	-0.331805	0.740037	0.959603	83.2853	301.888	139.374	237.309	188.067	10.4918
AT1G03070	8.5689	-1.19585	2.5499	-0.468979	0.639085	0.935915	5.55235	30.1888	0	0	15.6723	0
AT1G03080	978.586	0.507296	0.422513	1.20066	0.229881	0.707091	958.706	698.535	767.083	1578.62	1489.99	378.581
AT1G03090	1711.66	0.27469	0.355963	0.771682	0.440303	0.867438	1338.12	1284.7	2024.6	3115.97	1277.29	1229.29
AT1G03100	20.8626	0.300847	1.46979	0.204688	0.837816	0.977513	9.25392	26.8345	19.9106	37.8319	31.3446	0
AT1G03103	0.832428	-3.11728	3.9566	-0.787868	0.430774	NA	1.85078	0	3.14378	0	0	0
AT1G03106	6.72399	0.155558	2.72957	0.0569897	0.954553	0.994442	0	7.5472	11.5272	0	21.2695	0
AT1G03110	136.418	-0.54857	0.487929	-1.12428	0.260893	0.740493	134.182	201.259	150.902	88.2745	99.631	144.263
AT1G03120	116.033	0.103904	0.636902	0.163139	0.870409	0.982667	127.704	106.499	101.649	38.9783	122.02	199.345
AT1G03130	17428.1	-0.147919	0.227733	-0.649526	0.515998	0.895241	16721.8	20767.4	17474.2	13404	14371.5	21830
AT1G03140	475.162	-0.245067	0.297423	-0.823969	0.409957	0.851127	417.352	526.627	602.558	432.201	409.718	462.515
AT1G03150	734.898	0.212866	0.262863	0.8098	0.418055	0.855315	723.657	559.331	759.747	833.448	713.089	820.112
AT1G03160	870.233	-0.0141383	0.272825	-0.051822	0.958671	0.994442	721.806	827.676	1074.13	783.006	1028.77	786.014
AT1G03170	19.2876	-0.085507	1.55433	-0.055012	0.956129	0.994442	6.47775	26.8345	26.1982	10.3178	45.8974	0
AT1G03180	79.53	-0.605854	1.08292	-0.559465	0.575844	0.920685	131.406	74.6334	81.7383	104.324	85.0781	0
AT1G03190	231.584	-0.994053	0.383074	-2.59494	0.00946075	0.144311	256.334	369.813	298.659	176.549	150.006	138.143
AT1G03200	2.31906	1.99894	3.45395	0.57874	0.562765	NA	2.77618	0	0	8.02495	2.2389	0.87432
AT1G03210	443.5	0.103168	0.341532	0.302075	0.762595	0.964303	591.326	310.274	381.446	483.79	422.032	472.133
AT1G03220	11719.3	-1.05797	0.230547	-4.58895	4.45e-06	0.000535089	16562.7	15292.3	15646.6	8233.6	5251.34	9329
AT1G03230	588.525	-1.20367	0.41534	-2.89803	0.00375518	0.0786038	864.316	739.625	858.253	546.843	144.409	377.706
AT1G03240	1.30065	2.77137	3.94723	0.702105	0.482614	NA	0.925392	0	0	6.87853	0	0
AT1G03250	709.613	0.130807	0.281838	0.464122	0.64256	0.937256	613.535	701.889	716.782	942.358	601.144	681.97
AT1G03260	197.357	0.0427798	0.436095	0.0980976	0.921855	0.990766	125.853	249.896	207.49	176.549	225.009	199.345
AT1G03270	13.2699	-2.51059	1.40325	-1.78912	0.0735954	0.448123	10.1793	20.9644	36.6775	3.43926	2.2389	6.12024
AT1G03280	566.058	0.222036	0.3083	0.720195	0.471405	0.881611	607.057	468.765	491.478	661.485	724.284	443.28
AT1G03290	609.66	-0.08359	0.304346	-0.274654	0.783582	0.967552	605.206	630.61	645.523	697.024	673.908	405.685
AT1G03300	95.6726	0.328094	0.678792	0.48335	0.628847	0.933935	42.568	145.912	66.0194	53.8818	123.139	142.514
AT1G03310	84.3259	0.12787	0.710187	0.180051	0.857113	0.980008	86.0615	61.2162	94.3135	119.228	119.781	25.3553
AT1G03320	0	NA	NA	NA	NA	NA	0	0	0	0	0	0
AT1G03330	479.523	0.60781	0.39424	1.54173	0.12314	0.556855	553.385	289.309	297.611	495.254	407.479	834.101
AT1G03340	96.1508	-0.558156	0.536423	-1.04051	0.298101	0.772833	103.644	96.4364	143.566	77.9567	78.3614	76.9402
AT1G03350	625.287	-0.20251	0.331393	-0.611087	0.541142	0.905311	620.013	558.493	828.911	425.322	804.884	514.1
AT1G03360	90.5901	0.290121	0.568869	0.509995	0.610055	0.929616	72.1806	81.342	91.1697	66.4924	110.825	121.531
AT1G03365	345.421	-0.521008	0.366534	-1.42144	0.155188	0.611289	421.053	327.884	472.615	201.77	369.418	279.782
AT1G03370	1335.3	-0.249029	0.235348	-1.05813	0.289995	0.766581	1588.9	1525.37	1236.55	1292.02	1032.13	1336.84
AT1G03380	772.353	0.0174776	0.321412	0.0543774	0.956634	0.994442	838.405	706.921	757.652	512.45	1110.49	708.199
AT1G03390	10.7063	-1.37568	2.37543	-0.579131	0.562501	0.913502	0	28.5116	17.8148	0	17.9112	0
AT1G03400	1163.72	-0.00426678	0.243216	-0.0175432	0.986003	0.997041	1088.26	1126.21	1282.66	979.044	1111.61	1394.54
AT1G03410	581.354	-0.00811389	0.302932	-0.0267845	0.978632	0.996795	618.162	483.859	647.619	444.812	585.472	708.199
AT1G03420.1	0.186575	1.11658	4.08047	0.27364	0.784361	NA	0	0	0	0	1.11945	0
AT1G03430	794.266	-0.653151	0.305259	-2.13966	0.0323821	0.300057	1159.52	669.185	1084.6	742.881	502.633	606.778
AT1G03440	167.326	-0.774786	0.465026	-1.66611	0.0956906	0.501133	161.944	174.424	297.611	108.91	114.184	146.886
AT1G03445	5.75885	-0.770965	2.22592	-0.346358	0.729074	0.957982	17.5825	0	4.19171	3.43926	6.71669	2.62296
AT1G03457	164.971	1.31689	0.626394	2.10233	0.0355239	0.313686	152.69	25.1573	105.841	165.085	334.715	206.34
AT1G03470	99.7963	-0.638404	0.861251	-0.741252	0.458541	0.874975	12.9555	207.129	144.614	83.6888	27.9862	122.405
AT1G03475	903.46	0.166577	0.26682	0.624305	0.532427	0.901327	746.792	940.045	866.636	1152.15	964.965	750.167
AT1G03490	1.04793	-3.44746	3.94646	-0.873558	0.382359	NA	0	0	6.28756	0	0	0
AT1G03495	41.8922	-0.533537	1.00582	-0.530448	0.595802	0.925021	23.1348	60.3776	64.9715	47.0033	51.4947	4.3716
AT1G03502	2.034	-1.38971	3.61766	-0.384145	0.700871	NA	4.62696	0	4.19171	1.14642	2.2389	0
AT1G03506	5.54938	1.89258	2.54968	0.742283	0.457916	0.874549	1.85078	0	5.23964	19.4892	6.71669	0
AT1G03510	24.4744	0.516495	1.20094	0.430075	0.667141	0.945406	10.1793	46.9603	3.14378	21.782	40.3002	24.481
AT1G03515	0.154232	-0.806974	4.08047	-0.197765	0.843229	NA	0.925392	0	0	0	0	0
AT1G03520	709.852	-0.129201	0.30882	-0.41837	0.675677	0.947368	478.428	845.286	901.218	638.557	727.642	667.981
AT1G03530	91.3531	0.21806	0.616212	0.353872	0.723435	0.957972	97.1662	62.8933	93.2655	73.371	156.723	64.6997
AT1G03540	26.4038	0.625547	1.39703	0.447769	0.65432	0.941209	37.0157	11.7401	13.6231	0	31.3446	64.6997
AT1G03545	0	NA	NA	NA	NA	NA	0	0	0	0	0	0
AT1G03550	262.004	0.447182	0.392797	1.13846	0.25493	0.734057	282.245	169.393	213.777	316.412	231.726	358.471
AT1G03560	234.528	-0.00148702	0.506965	-0.00293319	0.99766	0.999607	173.974	233.125	296.563	230.431	371.657	101.421
AT1G03570	0	NA	NA	NA	NA	NA	0	0	0	0	0	0
AT1G03580	570.838	0.150394	0.360034	0.417721	0.676151	0.947368	579.296	504.824	538.635	718.806	763.464	320.001
AT1G03590	379.614	-0.409914	0.365485	-1.12156	0.262049	0.740993	569.116	441.93	288.18	294.63	391.807	292.023
AT1G03600	2566.19	-0.152683	0.302571	-0.504619	0.613826	0.930848	2289.42	3160.6	2655.45	3359.02	1381.4	2551.27
AT1G03610	4392.82	-0.364815	0.210824	-1.73042	0.0835547	0.474633	4656.57	5158.93	5019.57	3698.36	4675.94	3147.55
AT1G03620	67.2668	0.260896	0.784257	0.332666	0.739386	0.959603	95.3154	32.7045	55.5402	132.985	30.2251	56.8308
AT1G03630	1735.23	0.119893	0.30769	0.389656	0.696791	0.952349	1313.13	1754.3	1922.95	1700.14	1132.88	2587.99
AT1G03640	0.349309	-1.84943	4.02565	-0.459412	0.645938	NA	0	0	2.09585	0	0	0
AT1G03650	57.2875	-0.615795	0.768086	-0.801727	0.422711	0.857791	90.6884	42.7674	74.4029	40.1248	73.8836	21.858
AT1G03660	5.53736	6.01393	3.58713	1.67653	0.0936346	0.496578	0	0	0	0	0	33.2242
AT1G03670	2.62194	-4.77817	3.9226	-1.21811	0.22318	NA	15.7317	0	0	0	0	0
AT1G03680	4835.81	0.600041	0.242337	2.47606	0.013284	0.179612	3040.84	3910.29	4582.59	6817.77	4349.06	6314.34
AT1G03687	235.232	0.0729747	0.382291	0.190888	0.848613	0.97958	235.975	212.999	238.927	189.16	300.012	234.318
AT1G03700	0	NA	NA	NA	NA	NA	0	0	0	0	0	0
AT1G03710	3.31844	-5.11534	3.9193	-1.30517	0.191837	NA	0	0	19.9106	0	0	0
AT1G03720	0	NA	NA	NA	NA	NA	0	0	0	0	0	0
AT1G03730	1514.68	-0.38057	0.313381	-1.2144	0.224594	0.703153	1626.84	1646.13	1866.36	1121.2	2000.46	827.107
AT1G03740	1378.1	0.360245	0.271641	1.32618	0.184781	0.65291	1442.69	925.789	1252.27	1972.99	1323.19	1351.7
AT1G03743	12.7374	0.119135	1.65467	0.0719994	0.942602	0.992792	15.7317	0	20.9585	10.3178	14.5528	14.8634
AT1G03746	21.9501	-1.52355	1.20433	-1.26506	0.205851	0.67731	25.911	31.8659	39.8212	5.73211	25.7473	2.62296
AT1G03750	88.6556	0.554656	0.568058	0.976408	0.328862	0.798859	62.0013	65.409	88.0259	115.789	122.02	78.6888
AT1G03760	12.5877	-0.039318	1.36674	-0.0287679	0.97705	0.996717	5.55235	20.1259	12.5751	17.1963	7.83614	12.2405
AT1G03770	23.5954	0.394144	1.15304	0.341829	0.73248	0.958663	13.8809	41.9289	5.23964	40.1248	16.7917	23.6066
AT1G03780	16.1625	0.300667	1.47879	0.20332	0.838885	0.97754	1.85078	31.0274	10.4793	41.2712	4.4778	7.86888
AT1G03790	0.899856	-0.0584698	3.92323	-0.0149035	0.988109	NA	2.77618	0	0	0	0	2.62296
AT1G03800	8.67563	1.2131	2.5282	0.479827	0.63135	0.934464	0	0	15.7189	21.782	14.5528	0
AT1G03810	0	NA	NA	NA	NA	NA	0	0	0	0	0	0
AT1G03820	0	NA	NA	NA	NA	NA	0	0	0	0	0	0
AT1G03830	25.7231	-1.74393	1.05326	-1.65575	0.0977729	0.506117	56.4489	44.4446	17.8148	17.1963	12.3139	6.12024
AT1G03840	0.14572	1.11658	4.08047	0.27364	0.784361	NA	0	0	0	0	0	0.87432
AT1G03850	1691.67	-0.936896	0.757381	-1.23702	0.216079	0.692875	1725.86	2598.75	2343.17	530.793	505.991	2445.47
AT1G03860	599.642	0.329193	0.354887	0.927599	0.353616	0.816234	634.819	413.419	547.018	416.151	644.803	941.643
AT1G03870	1713.36	0.87678	0.285745	3.0684	0.00215209	0.0550274	1136.38	1018.87	1470.24	2118.59	1533.65	3002.42
AT1G03880	0	NA	NA	NA	NA	NA	0	0	0	0	0	0
AT1G03890	0	NA	NA	NA	NA	NA	0	0	0	0	0	0
AT1G03900	386.711	0.00172425	0.332278	0.00518918	0.99586	0.999565	450.666	278.408	430.698	377.173	375.015	408.308
AT1G03905	148.889	0.932192	0.484528	1.92392	0.0543647	0.387608	120.301	64.5705	122.608	161.645	200.381	223.826
AT1G03910	697.568	0.00651498	0.260518	0.0250078	0.980049	0.996795	609.833	677.571	800.617	690.146	756.748	650.494
AT1G03920	4.58485	-3.52089	2.65799	-1.32465	0.185289	0.653781	10.1793	2.51573	12.5751	0	2.2389	0
AT1G03930	471.082	0.41012	0.285373	1.43714	0.150678	0.605866	464.547	378.198	370.966	522.768	541.813	548.199
AT1G03935	9.56263	1.52214	1.82227	0.835299	0.403549	0.846601	0	3.35431	11.5272	5.73211	20.1501	16.6121
AT1G03940	25.9146	1.8306	1.05833	1.7297	0.0836832	0.474934	12.9555	7.5472	13.6231	43.564	63.8086	13.9891
AT1G03950	300.144	-0.0242958	0.374973	-0.0647934	0.948338	0.993197	292.424	382.391	232.64	343.926	321.282	228.198
AT1G03960	428.847	0.113804	0.346873	0.328085	0.742848	0.96037	558.937	370.651	305.995	528.5	388.449	420.548
AT1G03970	23.1561	0.513232	1.0314	0.497607	0.618761	0.932565	21.284	10.9015	25.1503	20.6356	26.8668	34.0985
AT1G03980	23.8903	1.69784	1.51457	1.12101	0.262285	0.741288	0.925392	32.7045	0	33.2462	53.7336	22.7323
AT1G03982	24.3636	-0.900201	1.207	-0.745818	0.455777	0.873441	8.32853	67.9248	18.8627	5.73211	31.3446	13.9891
AT1G03990	77.3113	-0.330039	0.661135	-0.4992	0.617638	0.932494	84.2107	98.9521	75.4508	38.9783	52.6141	113.662
AT1G04000	662.832	-0.269145	0.37323	-0.721124	0.470833	0.881311	356.276	841.932	975.62	539.965	554.127	709.074
AT1G04010	56.332	-0.0943948	0.76499	-0.123394	0.901795	0.987108	49.9712	89.7278	34.5816	84.8352	44.778	34.0985
AT1G04020	49.3595	0.876548	0.792072	1.10665	0.268444	0.747662	21.284	49.4761	33.5337	100.885	48.1363	42.8417
AT1G04030	16.1276	2.20041	1.24777	1.76347	0.0778211	0.460365	6.47775	2.51573	8.38342	21.782	23.5084	34.0985
AT1G04040	335.619	1.81918	0.377988	4.81281	1.49e-06	0.000232934	148.063	128.302	168.716	370.294	473.527	724.811
AT1G04050	177.271	-0.403113	0.564506	-0.714099	0.475166	0.884049	344.246	73.7948	187.579	168.524	160.081	129.399
AT1G04070	183.744	0.0148563	0.498393	0.0298084	0.97622	0.996651	117.525	269.183	161.381	263.677	137.692	153.006
AT1G04080	2790.57	0.0582766	0.211062	0.276112	0.782462	0.967465	2854.83	2480.51	2868.18	2794.98	2414.65	3330.29
AT1G04090	6.03181	0.585388	2.51148	0.233085	0.815696	0.976222	0	5.03146	9.43135	19.4892	2.2389	0
AT1G04100	183.866	-0.0224299	0.505925	-0.0443344	0.964638	0.995442	217.467	148.428	189.675	210.942	251.876	84.8091
AT1G04110	9.20935	1.51806	2.17492	0.697985	0.485186	0.885704	0	10.0629	4.19171	29.807	11.1945	0
AT1G04120	130.875	-0.919044	0.475247	-1.93382	0.0531349	0.383698	174.899	187.841	150.902	71.0781	105.228	95.3009
AT1G04130	255.867	-0.515027	0.413895	-1.24434	0.213374	0.688691	218.393	389.1	295.516	273.995	154.484	203.717
AT1G04140	853.95	-0.274399	0.242026	-1.13376	0.256895	0.736736	1031.81	827.676	945.231	830.009	746.672	742.298
AT1G04150	0	NA	NA	NA	NA	NA	0	0	0	0	0	0
AT1G04160	52.315	-0.393323	0.898867	-0.437576	0.661694	0.943189	74.9568	55.3461	48.2047	16.0499	17.9112	101.421
AT1G04170	428.537	-0.344312	0.354272	-0.971888	0.331106	0.800775	458.995	533.335	446.417	238.456	397.404	496.614
AT1G04171	0	NA	NA	NA	NA	NA	0	0	0	0	0	0
AT1G04180	0	NA	NA	NA	NA	NA	0	0	0	0	0	0
AT1G04190	466.276	0.644818	0.316378	2.03812	0.0415374	0.336139	334.992	389.939	366.775	463.154	504.872	737.926
AT1G04200	428.785	0.777853	0.355641	2.18719	0.0287289	0.281698	257.259	400.84	289.228	734.856	425.391	465.138
AT1G04210	473.153	-0.436498	0.295801	-1.47565	0.140038	0.587194	541.354	446.962	644.475	410.419	399.643	396.067
AT1G04220	87.1953	-1.09943	0.641843	-1.71293	0.0867253	0.480945	146.212	113.208	97.4573	24.0749	70.5253	71.6943
AT1G04230	237.327	0.522753	0.432187	1.20955	0.226451	0.705122	210.989	139.204	234.736	223.552	219.412	396.067
AT1G04240	1100.06	0.310981	0.310334	1.00209	0.316302	0.789419	915.213	798.326	1233.41	927.455	997.429	1728.53
AT1G04250	1367.11	-0.173535	0.278831	-0.622366	0.533701	0.901873	1754.54	1169.82	1424.13	1259.92	947.054	1647.22
AT1G04260	270.6	-0.197008	0.536912	-0.366928	0.713672	0.957581	128.63	303.565	434.89	420.737	139.931	195.848
AT1G04270	773.739	-0.120308	0.367565	-0.327311	0.743433	0.960385	885.6	799.164	733.549	882.745	348.149	993.228
AT1G04280	1674.36	-0.876741	0.337461	-2.59805	0.00937555	0.143481	2439.33	2162.69	1903.04	593.846	1185.5	1761.76
AT1G04290	77.9945	0.69876	0.640358	1.0912	0.275183	0.756022	69.4044	59.539	49.2526	131.838	106.348	51.5849
AT1G04295	0	NA	NA	NA	NA	NA	0	0	0	0	0	0
AT1G04300	1001.93	0.231262	0.344725	0.67086	0.50231	0.890616	825.45	933.337	1006.01	1193.42	1503.42	549.947
AT1G04310	15.5516	-2.0747	1.5458	-1.34215	0.179547	0.646036	36.0903	27.6731	11.5272	4.58569	13.4334	0
AT1G04320	0	NA	NA	NA	NA	NA	0	0	0	0	0	0
AT1G04330	0.925392	-3.27624	3.95143	-0.829128	0.407032	NA	5.55235	0	0	0	0	0
AT1G04340	375.044	-0.117597	0.324098	-0.362845	0.716721	0.957581	350.724	464.572	355.247	361.123	410.838	307.761
AT1G04350	2186.06	-0.215121	0.191152	-1.1254	0.260421	0.739967	2333.84	2286.8	2425.95	2018.85	1925.45	2125.47
AT1G04360	185.559	-0.390342	0.687936	-0.56741	0.570436	0.917837	168.421	305.242	158.237	113.496	31.3446	336.613
AT1G04370	0	NA	NA	NA	NA	NA	0	0	0	0	0	0
AT1G04380	14.8739	3.10835	1.85548	1.67522	0.0938909	0.49724	9.25392	0	0	61.9068	6.71669	11.3662
AT1G04390	168.283	-0.466778	0.625744	-0.745958	0.455693	0.873441	302.603	113.208	169.764	94.0066	269.787	60.3281
AT1G04400	1505.7	-0.0390694	0.21875	-0.178603	0.85825	0.980494	1468.6	1420.55	1689.26	1360.8	1672.46	1422.52
AT1G04410	5562.95	-0.0518895	0.190975	-0.271709	0.785846	0.967552	4970.28	6487.23	5530.96	5306.79	5823.37	5259.04
AT1G04420	1038.86	0.577932	0.278298	2.07667	0.0378322	0.322981	595.953	1048.22	856.157	1109.74	1406.03	1217.05
AT1G04425	0	NA	NA	NA	NA	NA	0	0	0	0	0	0
AT1G04430	1687.81	0.777941	0.299914	2.59388	0.00948996	0.144589	1179.88	1226.84	1323.53	1499.52	3218.42	1678.69
AT1G04440	2345.21	0.154058	0.221756	0.69472	0.487231	0.885964	2399.54	2024.33	2237.33	2299.72	2107.92	3002.42
AT1G04445	11.1759	0.732444	1.46124	0.501249	0.616196	0.931695	11.1047	6.70862	7.33549	25.2213	12.3139	4.3716
AT1G04450	31.3347	1.29177	1.67176	0.772703	0.439698	0.867108	37.0157	0.838577	16.7668	0	2.2389	131.148
AT1G04457	0	NA	NA	NA	NA	NA	0	0	0	0	0	0
AT1G04470	2.0703	4.58906	3.92918	1.16794	0.242829	NA	0	0	0	4.58569	7.83614	0
AT1G04480	781.537	-0.21856	0.286764	-0.762161	0.445964	0.869204	946.676	913.211	662.29	589.261	685.103	892.681
AT1G04490	9.61168	-0.281527	1.80105	-0.156313	0.875786	0.983329	7.40314	11.7401	12.5751	0	6.71669	19.235
AT1G04500	0.462696	-2.27699	3.99552	-0.569887	0.568755	NA	2.77618	0	0	0	0	0
AT1G04501	0	NA	NA	NA	NA	NA	0	0	0	0	0	0
AT1G04510	260.528	0.187421	0.412812	0.45401	0.649822	0.940282	255.408	284.278	190.723	393.223	238.443	201.094
AT1G04520	31.7383	0.254472	1.1669	0.218075	0.827371	0.977513	61.0759	1.67715	24.1023	25.2213	50.3752	27.9782
AT1G04530	1577.86	0.222167	0.215217	1.03229	0.301936	0.774428	1270.56	1606.71	1492.25	1820.52	1665.74	1611.37
AT1G04540	12.6515	-1.33839	2.15519	-0.621011	0.534592	0.902055	0.925392	0	53.4443	11.4642	10.075	0
AT1G04550	338.212	-0.408563	0.390647	-1.04586	0.295625	0.771336	366.455	422.643	368.87	229.284	204.859	437.16
AT1G04555	212.317	-0.433736	0.449537	-0.964849	0.33462	0.804787	214.691	235.64	281.892	100.885	236.204	204.591
AT1G04560	0.419289	-2.14839	4.00369	-0.536602	0.591543	NA	0	2.51573	0	0	0	0
AT1G04570	27.2778	3.03594	3.57447	0.84934	0.395692	0.840012	0	0	17.8148	108.91	36.9418	0
AT1G04580	0.174655	-0.806974	4.08047	-0.197765	0.843229	NA	0	0	1.04793	0	0	0
AT1G04590	186.904	-0.970887	0.520586	-1.86499	0.0621829	0.413619	322.036	306.919	113.176	145.596	148.887	84.8091
AT1G04600	3.31205	-4.0878	3.4239	-1.1939	0.232516	NA	14.8063	0	4.19171	0	0	0.87432
AT1G04610	2.15925	-4.49814	3.92598	-1.14574	0.251904	NA	12.9555	0	0	0	0	0
AT1G04620	46.3685	1.40004	0.978475	1.43084	0.152476	0.607699	44.4188	27.6731	4.19171	122.667	42.5391	36.7214
AT1G04625	0.527382	1.14545	4.03022	0.284216	0.776245	NA	0.925392	0	0	0	2.2389	0
AT1G04630	362.74	-0.558864	0.373194	-1.49751	0.134259	0.575637	303.529	508.178	485.19	233.87	257.473	388.198
AT1G04635	0.186575	1.11658	4.08047	0.27364	0.784361	NA	0	0	0	0	1.11945	0
AT1G04640	459.306	-0.365795	0.388757	-0.940936	0.346738	0.812292	372.933	669.185	509.293	580.089	251.876	372.46
AT1G04645	2.29435	-2.37274	3.8762	-0.612131	0.540451	NA	0	0	11.5272	0	2.2389	0
AT1G04650	62.9322	-0.518713	0.715249	-0.72522	0.468317	0.880061	94.39	49.4761	78.5946	69.9317	25.7473	59.4538
AT1G04660	0.308464	-1.69267	4.03906	-0.419074	0.675162	NA	1.85078	0	0	0	0	0
AT1G04670	0	NA	NA	NA	NA	NA	0	0	0	0	0	0
AT1G04680	322.864	0.258012	0.494142	0.522142	0.601572	0.927223	198.034	432.706	251.503	435.64	141.051	478.253
AT1G04684	0	NA	NA	NA	NA	NA	0	0	0	0	0	0
AT1G04690	1116.03	0.197122	0.311998	0.631807	0.527513	0.899534	815.271	1172.33	1132.81	784.152	1129.52	1662.08
AT1G04700	5.59316	0.841149	2.5645	0.327997	0.742914	0.96037	3.70157	0	8.38342	0	2.2389	19.235
AT1G04710	277.75	0.0945049	0.397964	0.237471	0.812291	0.975184	236.9	195.389	374.11	230.431	320.162	309.509
AT1G04720	0	NA	NA	NA	NA	NA	0	0	0	0	0	0
AT1G04730	13.6285	0.455437	1.66649	0.273292	0.784629	0.967552	12.0301	6.70862	15.7189	12.6106	34.7029	0
AT1G04750	1066.51	0.643622	0.286377	2.24747	0.0246101	0.259941	804.166	1059.96	632.948	1439.91	994.071	1467.98
AT1G04760	63.5583	-2.04859	1.04655	-1.95748	0.0502914	0.372127	149.914	71.2791	85.9301	0	51.4947	22.7323
AT1G04770	2834.99	-1.43338	0.323141	-4.43579	9.17e-06	0.000947625	5071.15	4194.56	3149.02	835.741	1524.69	2234.76
AT1G04778	0	NA	NA	NA	NA	NA	0	0	0	0	0	0
AT1G04780	710.225	-0.101759	0.290764	-0.34997	0.726361	0.957982	851.361	688.472	665.434	663.778	864.215	528.089
AT1G04790	409.17	-0.146939	0.320163	-0.458952	0.646269	0.938755	512.667	339.624	438.034	376.026	351.507	437.16
AT1G04800	2.84322	-0.239641	3.58921	-0.0667669	0.946767	NA	0	5.03146	4.19171	0	7.83614	0
AT1G04810	430.13	-0.84715	0.329733	-2.5692	0.0101933	0.151724	471.025	579.457	607.798	300.362	389.568	232.569
AT1G04820	970.711	0.264506	0.333345	0.79349	0.427493	0.860041	663.506	1226.84	755.556	1167.06	688.461	1322.85
AT1G04830	767.616	-0.0286166	0.338668	-0.0844976	0.932661	0.991934	894.854	668.346	761.843	1000.83	849.662	430.166
AT1G04840	17.317	-0.660057	1.90122	-0.347176	0.728459	0.957982	27.7618	3.35431	32.4858	0	40.3002	0
AT1G04850	1181.6	0.12692	0.221614	0.572706	0.566844	0.915278	1140.08	1103.57	1145.38	1106.3	1370.21	1224.05
AT1G04860	396.862	-0.283504	0.330703	-0.857279	0.391291	0.836514	497.861	399.163	409.74	447.104	349.268	278.034
AT1G04870	199.125	-0.521455	0.446995	-1.16658	0.24338	0.723213	240.602	257.443	206.442	163.938	100.75	225.575
AT1G04880	24.1885	2.39256	1.38544	1.72693	0.0841794	0.474958	5.55235	0	17.8148	59.6139	12.3139	49.8362
AT1G04890	0	NA	NA	NA	NA	NA	0	0	0	0	0	0
AT1G04900	58.3661	0.735259	0.690439	1.06492	0.286914	0.763998	42.568	56.1847	32.4858	92.8601	72.7642	53.3335
AT1G04910	361.579	0.169831	0.36051	0.471085	0.63758	0.935672	248.931	439.415	332.193	458.569	381.732	308.635
AT1G04920	5.02218	-4.69882	2.67503	-1.75655	0.0789948	0.463668	0.925392	13.4172	14.671	0	1.11945	0
AT1G04930	51.4893	1.74146	0.734325	2.37151	0.0177154	0.213535	33.3141	20.9644	16.7668	81.3959	91.7948	64.6997
AT1G04940	192.3	0.447598	0.436689	1.02498	0.305373	0.77723	155.466	218.03	114.224	231.577	247.398	187.105
AT1G04945	32.3755	-0.196995	1.08936	-0.180835	0.856497	0.980008	13.8809	9.22435	80.6904	35.5391	39.1807	15.7378
AT1G04950	538.916	-0.0456628	0.315757	-0.144613	0.885016	0.984525	484.906	519.918	637.14	612.189	603.383	375.958
AT1G04960	1689.72	0.151196	0.235159	0.642953	0.520255	0.897018	1802.66	1506.09	1494.34	1966.11	1970.23	1398.91
AT1G04970	1134.27	-0.173471	0.247606	-0.700592	0.483558	0.885704	1072.53	1088.47	1446.14	1046.68	1210.12	941.643
AT1G04980	181.819	0.0655981	0.667637	0.0982542	0.92173	0.990766	266.513	138.365	127.847	208.649	314.565	34.9728
AT1G04985	1290.77	0.0386743	0.267563	0.144543	0.885072	0.984525	1238.17	1488.47	1092.99	1708.17	1123.93	1092.9
AT1G04990	354.139	0.589129	0.408315	1.44283	0.149068	0.603438	361.828	215.514	271.413	491.815	239.562	544.701
AT1G05000	328.663	0.66269	0.514593	1.28779	0.197818	0.668983	246.154	254.928	261.982	578.943	517.185	112.787
AT1G05010	1397.89	0.0718858	0.354549	0.202753	0.839328	0.97754	1863.74	1065.83	1159.01	1520.15	2028.44	750.167
AT1G05020	113.828	0.325095	0.535426	0.607172	0.543737	0.905674	72.1806	124.948	105.841	163.938	124.259	91.8036
AT1G05030	160.42	-0.376373	0.474293	-0.793545	0.42746	0.860041	225.796	159.33	158.237	152.474	175.753	90.9293
AT1G05040	2.36587	0.778625	3.80702	0.204523	0.837944	NA	0	0	5.23964	0	8.95559	0
AT1G05055	209.905	-0.457486	0.611815	-0.747752	0.45461	0.872494	63.8521	232.286	432.794	110.056	235.084	185.356
AT1G05060	251.723	0.0993029	0.391351	0.253744	0.799694	0.972316	292.424	186.164	250.455	278.58	303.371	199.345
AT1G05061	1.67917	4.28674	3.93438	1.08956	0.275907	NA	0	0	0	0	10.075	0
AT1G05065	10.5023	1.2368	1.58678	0.779443	0.435719	0.864667	0.925392	12.5787	5.23964	6.87853	19.0306	18.3607
AT1G05070	462.192	0.743738	0.325198	2.28703	0.022194	0.246654	246.154	361.427	429.65	564.039	528.38	643.5
AT1G05080	0	NA	NA	NA	NA	NA	0	0	0	0	0	0
AT1G05085	5.02665	-2.10281	2.97889	-0.705902	0.480249	0.88518	21.284	0	3.14378	5.73211	0	0
AT1G05090	50.1543	0.199325	0.774266	0.257437	0.796842	0.971884	40.7173	37.736	61.8277	26.3677	58.2113	76.0659
AT1G05100	1032.14	1.47344	0.339348	4.34199	1.41e-05	0.00129079	496.01	596.229	547.018	2360.48	1275.05	918.036
AT1G05120	279.863	0.26868	0.440619	0.609779	0.542008	0.905527	248.931	264.99	247.311	288.898	469.049	160.001
AT1G05135	1211.14	-0.361752	0.307112	-1.17791	0.238831	0.71771	1299.25	1463.32	1323.53	1570.6	713.089	897.052
AT1G05136	0	NA	NA	NA	NA	NA	0	0	0	0	0	0
AT1G05140	522.341	-0.704391	0.319232	-2.20652	0.0273479	0.275883	564.489	751.365	626.661	418.444	284.34	488.745
AT1G05150	188.83	-0.500014	0.431333	-1.15923	0.246362	0.725152	182.302	236.479	245.215	111.203	164.559	193.225
AT1G05160	277.393	0.174794	0.396529	0.44081	0.65935	0.943137	186.004	299.372	296.563	210.942	359.343	312.132
AT1G05170	528.606	-1.04143	0.388354	-2.68166	0.0073258	0.121861	796.763	673.378	664.386	181.135	535.097	320.876
AT1G05180	538.703	-0.15888	0.377342	-0.421051	0.673718	0.947259	545.981	690.988	468.424	276.288	536.216	714.32
AT1G05190	2569.57	0.42803	0.227836	1.87867	0.0602889	0.407953	2020.13	2539.21	2014.12	3183.61	2331.81	3328.54
AT1G05200	1060.86	-0.551089	0.225663	-2.44209	0.0146025	0.190821	1268.71	1179.88	1335.06	791.031	861.976	928.528
AT1G05205	191.856	0.533882	0.510788	1.04521	0.295925	0.771336	161.944	209.644	98.5052	304.948	116.423	259.673
AT1G05210	40.0267	-0.407482	0.879269	-0.463432	0.643054	0.937298	39.7919	77.1491	19.9106	22.9284	43.6585	36.7214
AT1G05220	7.31668	-0.850845	2.16511	-0.392981	0.694334	0.951734	21.284	1.67715	5.23964	1.14642	14.5528	0
AT1G05230	201.58	-0.530006	0.454406	-1.16637	0.243464	0.723213	249.856	279.246	185.483	208.649	97.3921	188.853
AT1G05240	3.0179	0.529745	3.53761	0.149747	0.880964	NA	7.40314	0	0	0	8.95559	1.74864
AT1G05250	0	NA	NA	NA	NA	NA	0	0	0	0	0	0
AT1G05260	6.81967	-0.768023	1.96769	-0.390316	0.696303	0.952151	0.925392	5.03146	19.9106	3.43926	1.11945	10.4918
AT1G05270	608.926	-0.00959481	0.386223	-0.0248427	0.98018	0.996795	366.455	785.747	680.105	834.595	616.816	369.837
AT1G05280	0.462696	-2.27699	3.99552	-0.569887	0.568755	NA	2.77618	0	0	0	0	0
AT1G05290	8.20972	-3.31925	2.23283	-1.48656	0.13713	0.581149	20.3586	23.4802	1.04793	0	0	4.3716
AT1G05291	0	NA	NA	NA	NA	NA	0	0	0	0	0	0
AT1G05300	24.692	-1.28314	1.4255	-0.900128	0.368052	0.824398	55.5235	31.8659	17.8148	0	4.4778	38.4701
AT1G05310	934.407	-0.287192	0.298315	-0.962713	0.335691	0.80538	1128.05	903.148	1051.07	600.725	762.345	1161.1
AT1G05320	399.728	-1.36703	0.392493	-3.48295	0.00049592	0.0195903	682.939	676.732	368.87	247.627	143.289	278.908
AT1G05330	124.992	-1.04638	1.67219	-0.625755	0.531476	0.9008	226.721	160.168	118.416	0	158.962	85.6834
AT1G05340	4414.54	-0.37495	0.205135	-1.82782	0.0675761	0.429883	5462.59	4799.18	4693.67	3124	4218.08	4189.74
AT1G05350	640.508	0.171335	0.265749	0.644727	0.519104	0.896453	505.264	664.153	638.188	697.024	638.086	700.33
AT1G05360	440.197	-0.193544	0.33875	-0.571346	0.567765	0.915908	637.595	394.97	376.206	475.765	392.927	363.717
AT1G05370	38.3455	-0.401129	1.24689	-0.321703	0.747678	0.961157	37.0157	30.1888	63.9236	0	24.6279	74.3172
AT1G05380	277.343	-0.179581	0.526093	-0.341348	0.732842	0.958663	310.932	164.361	408.692	105.471	417.554	257.05
AT1G05385	505.513	0.131708	0.311978	0.42217	0.672901	0.947024	348.873	509.855	588.935	492.961	525.022	567.434
AT1G05390	0	NA	NA	NA	NA	NA	0	0	0	0	0	0
AT1G05400	2.72406	-4.83226	3.92202	-1.23209	0.217917	NA	11.1047	0	5.23964	0	0	0
AT1G05410	199.211	0.0830263	0.443682	0.18713	0.851559	0.979725	150.839	269.183	160.333	153.62	233.965	227.323
AT1G05420	6.70382	1.71388	2.71976	0.630157	0.528592	0.900087	0	0	9.43135	24.0749	6.71669	0
AT1G05430	408.468	0.139524	0.343797	0.405834	0.684865	0.94917	448.815	390.777	326.953	380.612	333.596	570.057
AT1G05440	6.49639	6.24019	3.42044	1.82438	0.068094	0.431673	0	0	0	38.9783	0	0
AT1G05450	0.559725	2.69612	3.98931	0.675836	0.499145	NA	0	0	0	0	3.35835	0
AT1G05460	81.5177	-1.58662	0.756232	-2.09806	0.0358996	0.315074	134.182	153.46	79.6425	10.3178	38.0613	73.4429
AT1G05470	32.9457	-1.09593	0.969693	-1.13018	0.2584	0.738593	58.2997	20.9644	55.5402	8.02495	26.8668	27.9782
AT1G05490	11.8959	4.03278	2.33546	1.72676	0.0842112	0.474958	0	0	4.19171	0	3.35835	63.8254
AT1G05500	520.715	-0.147704	0.295017	-0.500663	0.616609	0.931882	464.547	655.768	521.868	458.569	457.855	565.685
AT1G05510	10.3987	-0.354084	2.15715	-0.164145	0.869617	0.982418	14.8063	20.1259	0	25.2213	2.2389	0
AT1G05520	210.47	-0.0974441	0.402278	-0.242231	0.808602	0.974437	178.601	284.278	189.675	198.331	208.218	203.717
AT1G05530	0	NA	NA	NA	NA	NA	0	0	0	0	0	0
AT1G05540	38.1468	-1.12422	1.24504	-0.902958	0.366548	0.823659	60.1505	28.5116	68.1153	19.4892	52.6141	0
AT1G05550	3.65816	-5.25884	3.63958	-1.4449	0.148485	NA	19.4332	2.51573	0	0	0	0
AT1G05560	54.3736	-0.355781	0.857459	-0.414926	0.678196	0.947622	34.2395	122.432	26.1982	57.3211	61.5697	24.481
AT1G05562	0.85285	-3.15049	3.95547	-0.796488	0.425748	NA	0.925392	0	4.19171	0	0	0
AT1G05570	168.777	1.29941	0.523302	2.4831	0.0130245	0.176798	71.2552	91.4049	129.943	387.49	161.201	171.367
AT1G05575	2163.81	-1.26791	0.305163	-4.15486	3.25e-05	0.00242767	3539.63	3392.05	2242.56	1296.6	779.137	1732.9
AT1G05577	31.2251	0.722491	1.24193	0.581751	0.560735	0.912705	14.8063	36.8974	18.8627	73.371	42.5391	0.87432
AT1G05580	1.85078	-4.27581	3.92917	-1.08822	0.276497	NA	11.1047	0	0	0	0	0
AT1G05590	157.855	0.892519	0.536485	1.66364	0.0961839	0.502824	144.361	50.3146	137.278	178.842	167.917	268.416
AT1G05600	63.1229	-1.4935	1.17297	-1.27326	0.202924	0.67408	99.9424	158.491	20.9585	0	78.3614	20.9837
AT1G05610	2.35329	-2.38701	3.87293	-0.616332	0.537675	NA	0.925392	10.9015	0	2.29284	0	0
AT1G05615	0	NA	NA	NA	NA	NA	0	0	0	0	0	0
AT1G05620	294.871	0.0320625	0.367059	0.0873496	0.930394	0.991769	309.081	229.77	336.385	230.431	311.207	352.351
AT1G05630	168.97	-0.396968	0.47261	-0.839948	0.400937	0.843782	250.781	172.747	152.997	115.789	118.662	202.842
AT1G05640	4.48084	0.750018	2.71103	0.276654	0.782045	0.967465	0	1.67715	8.38342	0	8.95559	7.86888
AT1G05650	0	NA	NA	NA	NA	NA	0	0	0	0	0	0
AT1G05660	1.94543	0.151148	3.81827	0.0395855	0.968424	NA	5.55235	0	0	0	0	6.12024
AT1G05670	340.268	-0.503851	0.355976	-1.41541	0.156949	0.614386	419.203	358.911	419.171	207.502	372.777	264.045
AT1G05675	2419.6	-1.24907	0.259742	-4.80888	1.52e-06	0.000235769	4404.87	2511.54	3302.02	1707.02	1209	1383.17
AT1G05680	103.321	-0.617377	0.691607	-0.89267	0.372034	0.82692	104.569	178.617	92.2176	21.782	110.825	111.913
AT1G05690	195.077	0.763476	0.396125	1.92736	0.0539343	0.386769	147.137	130.818	156.141	247.627	211.576	277.159
AT1G05700	6.42785	-0.379347	2.77237	-0.136831	0.891164	0.985434	17.5825	4.19289	0	0	16.7917	0
AT1G05710	261.681	0.426508	0.454743	0.93791	0.348291	0.812935	216.542	210.483	243.119	351.951	138.812	409.182
AT1G05720	344.861	0.330093	0.356035	0.927137	0.353855	0.816234	225.796	381.553	309.139	462.008	339.193	351.477
AT1G05730	3.74139	-1.23282	3.72371	-0.331071	0.740591	0.959603	15.7317	0	0	0	6.71669	0
AT1G05740	0	NA	NA	NA	NA	NA	0	0	0	0	0	0
AT1G05750	15.6067	-3.06671	1.75894	-1.7435	0.0812469	0.468741	14.8063	51.9918	16.7668	0	10.075	0
AT1G05760	0	NA	NA	NA	NA	NA	0	0	0	0	0	0
AT1G05770	2.83908	5.04523	3.92311	1.28603	0.198434	NA	0	0	0	10.3178	6.71669	0
AT1G05780	235.32	0.304139	0.362438	0.839149	0.401386	0.844291	206.362	205.451	220.065	230.431	289.937	259.673
AT1G05785	409.241	0.205155	0.476181	0.430833	0.66659	0.945277	362.754	420.966	356.295	623.653	551.888	139.891
AT1G05790	429.531	-0.0418575	0.431532	-0.0969974	0.922728	0.990766	615.386	387.423	303.899	471.179	587.711	211.585
AT1G05800	0	NA	NA	NA	NA	NA	0	0	0	0	0	0
AT1G05805	923.786	0.304248	0.243922	1.24732	0.212281	0.686856	813.42	845.286	821.575	1141.84	845.184	1075.41
AT1G05810	115.701	1.24206	0.591919	2.09836	0.035873	0.315046	72.1806	98.1136	35.6295	236.163	133.214	118.908
AT1G05820	51.4707	1.43657	0.781886	1.83732	0.0661627	0.426137	21.284	24.3187	37.7254	123.814	57.0919	44.5903
AT1G05830	1112.67	0.138687	0.249467	0.555931	0.578258	0.921176	1297.4	955.14	925.32	1187.69	1036.61	1273.88
AT1G05835	13.8335	-0.0530906	1.94081	-0.0273549	0.978177	0.996795	21.284	0	20.9585	19.4892	21.2695	0
AT1G05840	541.379	0.24103	0.329491	0.73152	0.464461	0.877925	544.131	315.305	629.804	567.479	602.264	589.292
AT1G05850	2295.86	0.45644	0.278627	1.63817	0.101386	0.512509	1922.04	1995.81	1889.41	3248.96	1586.26	3132.69
AT1G05860	334.232	-0.173517	0.365978	-0.47412	0.635415	0.934924	246.154	435.222	381.446	269.409	375.015	298.143
AT1G05870	782.108	0.22792	0.27772	0.820685	0.411826	0.852	883.75	631.449	646.571	723.392	803.764	1003.72
AT1G05880	0.154232	-0.806974	4.08047	-0.197765	0.843229	NA	0.925392	0	0	0	0	0
AT1G05890	936.245	0.17361	0.283089	0.613269	0.539698	0.905214	1081.78	740.464	817.383	913.698	1257.14	806.998
AT1G05894	15.1402	-0.109044	1.5667	-0.0696009	0.944511	0.992903	20.3586	18.4487	8.38342	0	15.6723	27.9782
AT1G05900	972.985	-0.259093	0.262249	-0.987965	0.32317	0.794421	1360.33	890.569	929.512	894.209	857.498	905.796
AT1G05910	309.048	-0.610311	0.358383	-1.70296	0.0885759	0.485991	380.336	376.521	363.631	174.256	303.371	256.176
AT1G05920	9.82369	-2.09946	2.10391	-0.997885	0.318335	0.791814	12.9555	3.35431	31.4378	0	11.1945	0
AT1G05925	0.419289	-2.14839	4.00369	-0.536602	0.591543	NA	0	2.51573	0	0	0	0
AT1G05930	6.90125	4.27298	2.6724	1.59893	0.109836	0.530372	0	0	2.09585	0	7.83614	31.4755
AT1G05940	751.101	0.125385	0.306089	0.409635	0.682073	0.94816	892.078	659.122	603.606	936.626	860.856	554.319
AT1G05950	78.6567	-0.360734	0.6928	-0.52069	0.602583	0.927613	71.2552	120.755	73.3549	26.3677	96.2726	83.9347
AT1G05960	449.398	0.288134	0.337063	0.854838	0.392641	0.837493	396.068	524.949	292.372	502.133	566.441	414.428
AT1G05970	419.542	0.418892	0.396594	1.05622	0.290866	0.76736	189.705	457.025	430.698	410.419	428.749	600.658
AT1G05980	0	NA	NA	NA	NA	NA	0	0	0	0	0	0
AT1G05990	0	NA	NA	NA	NA	NA	0	0	0	0	0	0
AT1G06000	93.3514	0.0994862	0.645192	0.154196	0.877455	0.983451	90.6884	65.409	114.224	74.5174	164.559	50.7106
AT1G06002	0.523964	-2.44069	3.9861	-0.612301	0.540339	NA	0	0	3.14378	0	0	0
AT1G06010	80.3335	-0.703115	0.618694	-1.13645	0.255768	0.735137	103.644	134.172	60.7798	58.4675	51.4947	73.4429
AT1G06020	44.2983	1.52622	0.883717	1.72704	0.0841598	0.474958	44.4188	12.5787	11.5272	51.589	50.3752	95.3009
AT1G06030	31.2338	-0.637966	1.30151	-0.490172	0.624012	0.933935	39.7919	21.803	52.3964	27.5141	45.8974	0
AT1G06040	4251.81	-0.113426	0.214381	-0.529086	0.596746	0.925801	4452.06	4089.74	4715.67	4222.27	3208.34	4822.75
AT1G06050	340.085	-0.206645	0.365387	-0.565551	0.571699	0.917949	301.678	302.726	489.382	267.116	296.654	382.952
AT1G06060	397.287	-0.124829	0.344951	-0.361875	0.717446	0.957581	346.097	483.859	412.883	456.276	415.316	269.291
AT1G06070	433.381	0.208586	0.348329	0.598819	0.549294	0.908507	284.095	483.021	439.082	379.466	588.83	425.794
AT1G06080	8.98594	-2.71784	2.16333	-1.25632	0.208998	0.682241	1.85078	33.5431	11.5272	0	0	6.99456
AT1G06090	0	NA	NA	NA	NA	NA	0	0	0	0	0	0
AT1G06100	8.24981	0.728934	2.22043	0.328285	0.742696	0.96037	9.25392	0	9.43135	0	8.95559	21.858
AT1G06110	1045.28	0.0757099	0.27401	0.276303	0.782315	0.967465	951.303	1076.73	1025.92	741.735	1241.47	1234.54
AT1G06120	0.340807	0.154807	4.08047	0.0379385	0.969737	NA	0.925392	0	0	0	1.11945	0
AT1G06130	2116.21	0.415328	0.193087	2.15098	0.0314775	0.296006	1823.95	1739.21	1877.89	2564.54	2372.11	2319.57
AT1G06135	38.4402	-0.827998	1.06017	-0.781003	0.4348	0.863826	35.1649	96.4364	15.7189	60.7603	11.1945	11.3662
AT1G06137	0	NA	NA	NA	NA	NA	0	0	0	0	0	0
AT1G06140	20.759	-0.464508	1.23584	-0.375865	0.707017	0.955601	51.822	10.9015	9.43135	10.3178	32.464	9.61752
AT1G06148	21.2488	-1.14643	1.40191	-0.81776	0.413494	0.852659	55.5235	20.9644	11.5272	1.14642	3.35835	34.9728
AT1G06149	0	NA	NA	NA	NA	NA	0	0	0	0	0	0
AT1G06150	63.8425	0.399883	0.85334	0.468609	0.639349	0.935915	94.39	61.2162	9.43135	96.2994	44.778	76.9402
AT1G06160	595.526	-0.0567835	0.417372	-0.13605	0.891782	0.985434	387.739	831.03	602.558	389.783	961.607	400.439
AT1G06170	3.6505	-1.65345	3.74098	-0.441984	0.658501	NA	16.6571	0	0	0	0	5.24592
AT1G06180	51.7453	-1.74234	0.768696	-2.26661	0.0234139	0.252865	77.7329	84.6963	76.4987	13.7571	40.3002	17.4864
AT1G06190	649.49	0.180087	0.318045	0.566231	0.571237	0.917949	492.309	644.866	689.536	622.507	933.62	514.1
AT1G06200	1253.55	0.258454	0.242692	1.06495	0.2869	0.763998	1202.08	1310.7	911.697	1231.26	1371.33	1494.21
AT1G06210	611.006	-0.270364	0.298659	-0.905262	0.365327	0.823278	846.734	492.245	665.434	531.94	583.233	546.45
AT1G06220	416.271	-0.486495	0.384659	-1.26474	0.205963	0.67731	486.756	374.844	596.271	199.477	435.466	404.81
AT1G06225	0	NA	NA	NA	NA	NA	0	0	0	0	0	0
AT1G06230	759.545	0.408767	0.260048	1.57189	0.115976	0.544256	719.03	544.237	694.776	848.352	960.487	790.385
AT1G06240	270.205	-0.142078	0.420195	-0.338125	0.735269	0.959059	161.944	347.171	341.624	228.138	232.845	309.509
AT1G06250	162.418	0.200963	0.567721	0.353982	0.723353	0.957972	169.347	228.093	55.5402	223.552	158.962	139.017
AT1G06260	0	NA	NA	NA	NA	NA	0	0	0	0	0	0
AT1G06265	199.62	0.266261	0.43467	0.612559	0.540168	0.905249	241.527	119.917	182.339	216.674	244.04	193.225
AT1G06270	31.124	-2.65196	1.46485	-1.81039	0.0702352	0.438254	71.2552	41.9289	48.2047	0	0	25.3553
AT1G06280	11.6981	-1.39633	2.33501	-0.597999	0.549841	0.908512	42.568	8.38577	0	0	0	19.235
AT1G06290	246.527	-0.542868	0.382796	-1.41817	0.156142	0.612721	299.827	331.238	246.263	191.452	161.201	249.181
AT1G06310	0	NA	NA	NA	NA	NA	0	0	0	0	0	0
AT1G06320	1.38809	-3.86092	3.93661	-0.980774	0.326704	NA	8.32853	0	0	0	0	0
AT1G06330	0	NA	NA	NA	NA	NA	0	0	0	0	0	0
AT1G06340	19.9641	-2.01331	1.79359	-1.1225	0.261648	0.740993	77.7329	5.87004	12.5751	0	0	23.6066
AT1G06350	0	NA	NA	NA	NA	NA	0	0	0	0	0	0
AT1G06360	11.9062	-1.76372	2.14944	-0.820546	0.411905	0.852	0	51.9918	3.14378	0	14.5528	1.74864
AT1G06370	615.029	0.686255	0.277543	2.47261	0.0134131	0.180884	401.62	514.048	498.813	638.557	828.392	808.746
AT1G06380	110.795	0.144891	0.506701	0.285949	0.774917	0.965767	114.749	80.5034	120.512	118.081	124.259	106.667
AT1G06390	1056.52	0.0560515	0.234997	0.238521	0.811477	0.975019	909.661	1158.91	1039.54	975.605	1100.42	1154.98
AT1G06400	2009.65	0.0736756	0.250718	0.293859	0.768866	0.964303	1458.42	2499.8	1916.66	1814.79	2216.51	2151.7
AT1G06410	3877.98	0.291171	0.322141	0.903861	0.366069	0.823652	3034.36	3906.09	3523.13	2534.74	6950.66	3318.92
AT1G06420	90.3778	1.34299	0.79843	1.68204	0.0925615	0.494618	40.7173	35.2203	77.5466	21.782	230.606	136.394
AT1G06430	813.862	0.183917	0.300515	0.612008	0.540532	0.905249	673.686	861.219	751.364	1037.51	573.158	986.233
AT1G06440	22.3312	-0.701284	1.60087	-0.438065	0.661339	0.943137	0.925392	36.8974	45.0609	30.9534	20.1501	0
AT1G06450	116.862	-0.118198	0.555716	-0.212695	0.831565	0.977513	136.958	150.105	77.5466	107.764	154.484	74.3172
AT1G06460	1163.08	0.0356711	0.245018	0.145586	0.884248	0.984518	1091.96	1053.25	1301.53	1246.16	954.89	1330.72
AT1G06470	465.726	0.352861	0.337098	1.04676	0.29521	0.771336	348.873	518.241	359.439	537.672	643.683	386.45
AT1G06475	10.767	-0.273452	1.71326	-0.159609	0.873189	0.983265	0.925392	21.803	12.5751	2.29284	23.5084	3.49728
AT1G06480	0	NA	NA	NA	NA	NA	0	0	0	0	0	0
AT1G06490	17.819	1.07376	2.01134	0.533854	0.593443	0.924297	32.3887	0	2.09585	0	3.35835	69.0713
AT1G06500	133.457	0.18404	0.559088	0.329178	0.742021	0.960235	122.152	171.07	81.7383	80.2495	136.573	208.963
AT1G06510	455.818	0.402924	0.291657	1.3815	0.167125	0.626528	418.277	375.683	383.541	596.139	504.872	456.395
AT1G06515	993.779	0.450525	0.250652	1.79741	0.0722704	0.444683	900.407	837.739	781.754	1148.71	933.62	1360.44
AT1G06520	17.5948	2.9682	1.72336	1.72233	0.085009	0.476582	0.925392	1.67715	9.43135	26.3677	67.1669	0
AT1G06530	901.763	0.343808	0.29042	1.18383	0.23648	0.715126	642.222	1003.78	737.741	1046.68	1209	771.15
AT1G06540	10.0165	0.827053	1.76555	0.468439	0.639471	0.935915	10.1793	0	11.5272	17.1963	8.95559	12.2405
AT1G06550	358.877	0.83324	0.502849	1.65704	0.0975115	0.505797	368.306	249.896	156.141	291.191	251.876	835.85
AT1G06560	156.309	0.697551	0.516774	1.34982	0.177074	0.64114	141.585	64.5705	151.949	188.013	139.931	251.804
AT1G06570	1349.03	-0.115557	0.225229	-0.513066	0.607905	0.929132	1305.73	1307.34	1595.99	1442.2	1245.95	1196.94
AT1G06580	84.0731	-0.0781474	0.653289	-0.119622	0.904783	0.987744	92.5392	45.2832	121.56	69.9317	57.0919	118.033
AT1G06590	101.131	-0.181246	0.711267	-0.254821	0.798861	0.972224	176.75	95.5978	50.3005	72.2246	41.4196	170.492
AT1G06610	0	NA	NA	NA	NA	NA	0	0	0	0	0	0
AT1G06620	1366.01	0.364298	0.260694	1.39742	0.162288	0.620755	987.393	1098.54	1497.49	1854.91	1441.85	1315.85
AT1G06630	1216.38	0.457933	0.249948	1.83211	0.0669344	0.428689	1095.66	1116.99	861.396	1692.12	1350.06	1182.08
AT1G06640	1598.84	1.06341	0.212477	5.00485	5.59e-07	0.00011106	922.616	1093.5	1088.8	2003.94	2147.1	2337.06
AT1G06645	1606.57	0.520746	0.284383	1.83114	0.067079	0.428724	1184.5	1297.28	1477.58	1253.04	2584.81	1842.19
AT1G06650	2148.85	0.129714	0.242658	0.534554	0.592958	0.924297	2167.27	1792.88	2196.46	2120.88	2851.24	1764.38
AT1G06660	26.6778	0.397814	0.996713	0.399126	0.6898	0.950515	21.284	22.6416	25.1503	13.7571	49.2558	27.9782
AT1G06670	531.121	-0.26457	0.359829	-0.735265	0.462178	0.877212	626.491	507.339	604.654	541.111	636.966	270.165
AT1G06680	27123.7	0.0870611	0.292489	0.297656	0.765966	0.964303	21707.9	31313.3	25896.4	25143.3	16744.7	41936.8
AT1G06690	481.573	-0.326424	0.328333	-0.994187	0.320132	0.792725	554.31	645.705	407.644	392.076	353.746	535.958
AT1G06700	1476.62	0.135571	0.212804	0.63707	0.524079	0.898695	1376.06	1392.88	1453.48	1398.63	1510.14	1728.53
AT1G06710	22.0294	-0.0396113	1.33079	-0.0297653	0.976254	0.996651	27.7618	36.0588	3.14378	33.2462	2.2389	29.7269
AT1G06720	169.772	0.151663	0.457814	0.331277	0.740435	0.959603	195.258	150.105	137.278	119.228	218.293	198.471
AT1G06730	165.724	-0.00256077	0.449944	-0.00569131	0.995459	0.999337	161.018	146.751	189.675	179.988	201.501	115.41
AT1G06740.1	26.2942	-0.933709	1.03809	-0.899448	0.368414	0.824641	59.2251	28.5116	15.7189	17.1963	25.7473	11.3662
AT1G06750	14.2327	0.123734	1.67521	0.0738621	0.94112	0.992792	24.0602	12.5787	4.19171	0	35.8224	8.7432
AT1G06760	612.665	0.089784	0.461663	0.19448	0.8458	0.979004	320.186	819.29	641.332	928.601	249.637	716.943
AT1G06770	277.258	0.0092032	0.396069	0.0232364	0.981462	0.996915	307.23	318.659	203.298	193.745	302.251	338.362
AT1G06780	453.583	0.60103	0.325507	1.84644	0.0648279	0.422929	384.963	368.974	326.953	536.525	701.895	402.187
AT1G06790	36.5931	-0.907903	0.850094	-1.068	0.285519	0.763602	56.4489	55.3461	31.4378	29.807	16.7917	29.7269
AT1G06800	129.072	0.0378439	0.524917	0.072095	0.942526	0.992792	174.899	106.499	100.601	181.135	98.5115	112.787
AT1G06810	5.84704	-1.8007	3.23691	-0.556303	0.578004	0.921176	0	0	27.2461	0	7.83614	0
AT1G06820	637.791	0.494683	0.270624	1.82794	0.0675591	0.429883	628.341	493.922	466.328	718.806	709.731	809.62
AT1G06830	10.2813	-1.19071	1.54694	-0.769721	0.441466	0.867873	12.0301	27.6731	3.14378	6.87853	6.71669	5.24592
AT1G06840	365.039	-0.0580543	0.43489	-0.133492	0.893804	0.986004	298.902	338.785	479.951	411.565	167.917	493.117
AT1G06850	158.172	0.5528	0.625372	0.883953	0.376721	0.829821	39.7919	218.869	125.751	225.845	229.487	109.29
AT1G06860	0.616928	-2.69167	3.97354	-0.677398	0.498153	NA	3.70157	0	0	0	0	0
AT1G06870	283.505	-0.238571	0.400322	-0.595947	0.551211	0.908759	322.036	218.869	380.398	201.77	231.726	346.231
AT1G06880	17.6767	0.500486	2.21634	0.225816	0.821345	0.977025	39.7919	0	4.19171	0	0	62.0767
AT1G06890	220.871	0.116655	0.460026	0.253583	0.799818	0.972316	280.394	192.873	162.429	329.023	141.051	219.454
AT1G06900	330.048	-0.469381	0.453971	-1.03394	0.301162	0.774178	382.187	318.659	448.513	298.07	413.077	119.782
AT1G06910	214.267	-0.47742	0.515213	-0.926645	0.354111	0.816234	212.84	272.538	263.03	66.4924	252.995	217.706
AT1G06920	2.49626	-0.298123	3.79965	-0.0784606	0.937462	NA	0.925392	0	7.33549	0	6.71669	0
AT1G06923	0	NA	NA	NA	NA	NA	0	0	0	0	0	0
AT1G06925	1.59527	-4.06388	3.9327	-1.03336	0.301437	NA	3.70157	5.87004	0	0	0	0
AT1G06930	17.6634	-1.45532	1.99433	-0.729727	0.465557	0.878637	6.47775	71.2791	0	0	1.11945	27.1039
AT1G06950	798.821	-0.408518	0.268681	-1.52045	0.128397	0.565488	761.598	918.242	1054.22	569.771	715.328	773.773
AT1G06960	505.327	-0.0138154	0.32009	-0.0431608	0.965573	0.995535	550.608	488.052	485.19	406.98	420.913	680.221
AT1G06970	6.91103	-0.444687	2.79972	-0.158833	0.873801	0.983265	0.925392	0	23.0544	0	0	17.4864
AT1G06980	94.2037	-0.455513	0.631559	-0.721251	0.470755	0.881311	119.376	109.015	98.5052	33.2462	122.02	83.0604
AT1G06990	5.70556	-0.838323	2.83291	-0.295923	0.767289	0.964303	10.1793	11.7401	0	0	12.3139	0
AT1G07000	1981.31	-0.986287	0.234877	-4.19916	2.68e-05	0.00210452	2845.58	2295.19	2760.24	1034.07	1410.51	1542.3
AT1G07010	936.884	0.390288	0.273708	1.42593	0.153889	0.609654	972.587	585.327	875.019	1126.93	1097.06	964.375
AT1G07020	492.208	0.176523	0.304366	0.579969	0.561936	0.913151	360.903	568.555	456.896	515.89	491.438	559.565
AT1G07025	9.56316	3.97579	2.08582	1.90611	0.056636	0.396049	0	3.35431	0	2.29284	24.6279	27.1039
AT1G07030	268.115	-0.0812274	0.399486	-0.20333	0.838877	0.97754	221.169	281.762	323.81	251.066	348.149	182.733
AT1G07040	310.773	0.0405806	0.378709	0.107155	0.914666	0.989493	331.29	196.227	391.925	339.341	311.207	294.646
AT1G07050	11.2318	-0.0644909	2.19462	-0.029386	0.976557	0.996651	24.9856	0	9.43135	32.0998	0	0.87432
AT1G07051	0	NA	NA	NA	NA	NA	0	0	0	0	0	0
AT1G07060	0	NA	NA	NA	NA	NA	0	0	0	0	0	0
AT1G07070	104.335	0.655087	0.55964	1.17055	0.241779	0.720803	51.822	115.724	75.4508	112.349	150.006	120.656
AT1G07080	3741.7	0.0621356	0.195039	0.31858	0.750045	0.961883	3435.98	3428.1	4119.4	4233.73	3628.13	3604.82
AT1G07090	30.4405	0.47032	0.985568	0.477207	0.633215	0.934464	49.0458	15.933	11.5272	38.9783	39.1807	27.9782
AT1G07100	0	NA	NA	NA	NA	NA	0	0	0	0	0	0
AT1G07110	5078.46	0.455001	0.220765	2.06102	0.0393013	0.328199	4105.04	4210.5	4536.48	6051.96	7140.97	4425.81
AT1G07119	2.13888	-0.894419	3.82034	-0.23412	0.814892	NA	8.32853	0	0	1.14642	3.35835	0
AT1G07120	4.02091	1.5588	2.84607	0.547705	0.583895	0.921591	0	5.03146	1.04793	5.73211	12.3139	0
AT1G07128	54.8291	-0.115305	0.713992	-0.161494	0.871704	0.983247	74.9568	43.606	52.3964	53.8818	68.2864	35.8471
AT1G07130	61.4862	-1.16401	0.772933	-1.50597	0.132076	0.571333	99.017	98.1136	57.636	49.2961	52.6141	12.2405
AT1G07135	11787.2	-0.175412	0.26047	-0.673443	0.500666	0.890014	15235.7	11621.8	10651.1	7595.04	15018.5	10601.1
AT1G07140	1539.71	-0.289229	0.245698	-1.17717	0.239126	0.718172	1686.06	1647.8	1746.9	1671.48	1027.65	1458.37
AT1G07150	277.46	0.630995	0.412525	1.52959	0.126117	0.561846	198.959	146.751	308.091	299.216	287.698	424.045
AT1G07160	260.857	0.420873	0.3793	1.1096	0.267169	0.746793	228.572	164.361	276.653	312.973	260.832	321.75
AT1G07170	878.81	0.213299	0.248517	0.85829	0.390732	0.836334	829.151	881.345	731.453	968.726	806.003	1056.18
AT1G07175	0	NA	NA	NA	NA	NA	0	0	0	0	0	0
AT1G07180	1638.14	0.383855	0.206903	1.85524	0.0635615	0.418709	1364.03	1415.52	1484.91	2042.92	1711.64	1809.84
AT1G07190	0	NA	NA	NA	NA	NA	0	0	0	0	0	0
AT1G07200	261.315	-0.701081	0.428827	-1.63488	0.102074	0.513852	455.293	228.093	287.132	183.427	265.309	148.634
AT1G07210	131.497	0.453404	0.56845	0.797615	0.425094	0.859264	189.705	59.539	83.8342	157.06	130.976	167.869
AT1G07220	334.363	-0.0684207	0.360268	-0.189916	0.849375	0.97958	378.485	296.018	352.104	308.387	429.868	241.312
AT1G07230	233.785	-0.134887	0.384107	-0.351171	0.72546	0.957982	189.705	240.672	303.899	208.649	235.084	224.7
AT1G07240	970.166	0.285194	0.248912	1.14577	0.251892	0.73103	708.85	888.053	1026.97	1093.69	1089.22	1014.21
AT1G07250	471.07	-0.117161	0.35149	-0.333326	0.738888	0.959603	447.89	446.123	576.36	650.021	341.432	364.592
AT1G07260	36.1628	0.980929	1.0468	0.937071	0.348722	0.812935	37.0157	20.1259	15.7189	111.203	14.5528	18.3607
AT1G07270	23.0213	0.164405	1.51682	0.108388	0.913688	0.989493	5.55235	21.803	37.7254	59.6139	13.4334	0
AT1G07280	1801.17	-0.012764	0.265758	-0.0480289	0.961693	0.995186	1305.73	2275.06	1846.45	1484.62	2112.4	1782.74
AT1G07290	14.7703	0.233069	1.62585	0.143352	0.886012	0.984723	9.25392	20.9644	10.4793	0	39.1807	8.7432
AT1G07300	520.335	0.394797	0.344319	1.1466	0.251545	0.73103	406.247	460.379	482.047	405.833	850.781	516.723
AT1G07310	1240.31	0.644063	0.287191	2.24263	0.0249206	0.261669	766.225	975.266	1162.15	1564.87	1907.54	1065.8
AT1G07320	1108.14	0.0147544	0.328171	0.0449595	0.96414	0.995442	847.659	1449.9	1009.15	1627.92	881.006	833.227
AT1G07330	1.48068	2.96156	3.94226	0.751235	0.452511	NA	0	0	1.04793	0	7.83614	0
AT1G07340	8.40699	-2.5511	1.96999	-1.29498	0.195327	0.665697	31.4633	7.5472	4.19171	0	1.11945	6.12024
AT1G07350	1070.96	-0.251465	0.309018	-0.813755	0.415785	0.854224	1455.64	1088.47	948.374	1099.42	624.653	1209.18
AT1G07360	974.543	0.347946	0.288218	1.20723	0.227342	0.705641	793.061	779.877	1000.77	846.059	956.009	1471.48
AT1G07370	63.9353	0.918651	0.76137	1.20658	0.227595	0.705641	15.7317	46.9603	70.2111	57.3211	80.6003	112.787
AT1G07380	76.6634	-0.270408	0.603187	-0.448298	0.653938	0.941209	83.2853	107.338	60.7798	60.7603	76.1225	71.6943
AT1G07390	80.3887	-1.17394	0.63391	-1.8519	0.0640395	0.419947	161.018	91.4049	81.7383	35.5391	67.1669	45.4646
AT1G07400	27.0821	-1.82741	1.60691	-1.13722	0.255445	0.734656	29.6126	68.7633	28.294	0	35.8224	0
AT1G07410	1.85636	4.43175	3.93175	1.12717	0.259671	NA	0	0	0	8.02495	2.2389	0.87432
AT1G07420	496.759	0.821965	0.357213	2.30105	0.0213889	0.241078	421.053	239.833	416.027	834.595	597.786	471.259
AT1G07430	606.878	0.211056	0.463076	0.45577	0.648555	0.940026	684.79	362.265	640.284	1027.19	698.536	228.198
AT1G07440	1481.05	0.0220224	0.219299	0.100422	0.920009	0.990408	1488.96	1332.5	1587.61	1656.58	1497.82	1322.85
AT1G07450	75.2709	0.872326	0.702861	1.24111	0.214566	0.690341	64.7775	39.4131	55.5402	104.324	38.0613	149.509
AT1G07460	0	NA	NA	NA	NA	NA	0	0	0	0	0	0
AT1G07470	997.63	-0.187327	0.250117	-0.748958	0.453882	0.872494	1020.71	1144.66	1021.73	1024.9	737.717	1036.07
AT1G07473	38.1797	0.310436	1.0152	0.305789	0.759766	0.964096	58.2997	34.3817	9.43135	27.5141	82.8392	16.6121
AT1G07476	16.5639	-0.0818708	1.59274	-0.0514024	0.959005	0.994442	0	30.1888	20.9585	4.58569	15.6723	27.9782
AT1G07480	1150.61	0.263419	0.285552	0.92249	0.356273	0.816394	1063.28	1178.2	895.978	1541.94	838.467	1385.8
AT1G07485	3.97856	3.48943	2.89475	1.20543	0.228036	0.705641	0.925392	0	1.04793	14.9035	0	6.99456
AT1G07490	0	NA	NA	NA	NA	NA	0	0	0	0	0	0
AT1G07500	318.652	0.23508	0.431623	0.544641	0.586	0.92201	415.501	147.59	315.426	275.141	396.285	361.969
AT1G07510	322.843	-0.0517819	0.345893	-0.149705	0.880997	0.984081	394.217	266.668	324.858	350.805	334.715	265.793
AT1G07520	210.025	-0.621101	0.414211	-1.49948	0.133749	0.57496	314.633	200.42	248.359	197.185	170.156	129.399
AT1G07530	308.209	-0.121499	0.414145	-0.293372	0.769238	0.964303	457.144	212.999	293.42	224.699	387.329	273.662
AT1G07540	0	NA	NA	NA	NA	NA	0	0	0	0	0	0
AT1G07550	0	NA	NA	NA	NA	NA	0	0	0	0	0	0
AT1G07560	2.94299	3.08904	3.54128	0.872296	0.383047	NA	1.85078	0	0	5.73211	10.075	0
AT1G07570	117.408	-0.196364	0.560972	-0.350043	0.726307	0.957982	173.048	85.5349	117.368	136.424	126.498	65.574
AT1G07580	0.559725	2.69612	3.98931	0.675836	0.499145	NA	0	0	0	0	3.35835	0
AT1G07590	2546.34	0.68615	0.323005	2.12427	0.0336477	0.305431	2561.49	2064.58	1229.22	4537.54	2181.81	2703.4
AT1G07600	0	NA	NA	NA	NA	NA	0	0	0	0	0	0
AT1G07610	720.324	1.02961	0.395228	2.60509	0.00918502	0.141192	702.373	346.332	372.014	1515.57	722.045	663.609
AT1G07615	114.619	-0.0993292	0.88442	-0.11231	0.910578	0.989131	77.7329	154.298	123.655	4.58569	221.651	105.793
AT1G07620	131.565	-0.730014	0.59837	-1.22	0.222463	0.700281	274.841	98.9521	118.416	107.764	134.334	55.0822
AT1G07630	439.039	-0.544049	0.29857	-1.82219	0.0684269	0.432745	578.37	440.253	543.874	356.537	387.329	327.87
AT1G07640	13.4844	-1.42004	1.88086	-0.754993	0.450253	0.870995	19.4332	13.4172	26.1982	0	0	21.858
AT1G07645	0	NA	NA	NA	NA	NA	0	0	0	0	0	0
AT1G07650	962.314	0.283808	0.316347	0.897142	0.369643	0.82541	885.6	767.298	951.518	1233.55	615.697	1320.22
AT1G07660	688.817	-0.0161943	0.311128	-0.0520502	0.958489	0.994442	788.434	615.516	674.865	546.843	558.605	948.637
AT1G07670	292.025	-0.221398	0.531849	-0.41628	0.677205	0.947368	210.989	360.588	372.014	82.5423	308.968	417.051
AT1G07680	0	NA	NA	NA	NA	NA	0	0	0	0	0	0
AT1G07690	0	NA	NA	NA	NA	NA	0	0	0	0	0	0
AT1G07700	2538.64	0.293742	0.198383	1.48068	0.138691	0.584291	2197.81	2168.56	2477.3	2503.78	3031.47	2852.91
AT1G07702	0	NA	NA	NA	NA	NA	0	0	0	0	0	0
AT1G07705	326.597	-0.1229	0.349322	-0.351825	0.72497	0.957982	390.516	294.341	336.385	310.68	382.852	244.81
AT1G07710	21.1739	-0.653293	1.57831	-0.413919	0.678934	0.947883	16.6571	7.5472	53.4443	0	45.8974	3.49728
AT1G07720	824.549	-0.00126779	0.3071	-0.00412826	0.996706	0.999607	1101.22	682.602	690.584	1053.56	704.133	715.194
AT1G07725	0	NA	NA	NA	NA	NA	0	0	0	0	0	0
AT1G07728	1.82864	-3.14233	3.93199	-0.799169	0.424192	NA	0	6.70862	3.14378	0	1.11945	0
AT1G07730	0	NA	NA	NA	NA	NA	0	0	0	0	0	0
AT1G07740	18.7752	-3.2224	1.78193	-1.80838	0.0705477	0.438859	0	92.2435	9.43135	1.14642	8.95559	0.87432
AT1G07745	596.098	0.372578	0.345751	1.07759	0.281217	0.760564	491.383	609.646	456.896	772.688	850.781	395.193
AT1G07747	0	NA	NA	NA	NA	NA	0	0	0	0	0	0
AT1G07750	273.783	-1.75406	0.486907	-3.60245	0.000315232	0.0141273	310.932	644.027	312.282	60.7603	163.44	151.257
AT1G07760	0	NA	NA	NA	NA	NA	0	0	0	0	0	0
AT1G07770	445.445	-0.168927	0.422732	-0.399609	0.689445	0.950515	383.112	592.874	438.034	702.756	250.757	305.138
AT1G07780	54.4203	-0.350722	0.896186	-0.391349	0.695539	0.951846	64.7775	60.3776	57.636	106.617	25.7473	11.3662
AT1G07790	340.615	-0.688823	0.513461	-1.34153	0.179749	0.64628	215.616	665.83	379.35	451.69	158.962	172.241
AT1G07795	0	NA	NA	NA	NA	NA	0	0	0	0	0	0
AT1G07800.1	0	NA	NA	NA	NA	NA	0	0	0	0	0	0
AT1G07810	534.728	-0.0329001	0.337509	-0.0974793	0.922346	0.990766	453.442	459.54	709.447	699.317	463.452	423.171
AT1G07820	1054.67	-0.0629887	0.335943	-0.187498	0.85127	0.979725	614.46	1458.29	1160.06	1298.9	820.556	975.741
AT1G07830	270.736	0.00544881	0.483699	0.0112649	0.991012	0.998234	297.051	343.817	169.764	349.659	123.139	340.985
AT1G07840	448.238	0.18249	0.283587	0.643505	0.519897	0.896808	428.457	401.679	429.65	451.69	517.185	460.767
AT1G07850	7.23735	-1.95306	2.74758	-0.71083	0.47719	0.884675	0.925392	33.5431	0	0	8.95559	0
AT1G07860	1.71953	3.24376	3.93598	0.82413	0.409866	NA	0	0.838577	0	0	3.35835	6.12024
AT1G07870	716.825	0.578793	0.316913	1.82635	0.0677978	0.430537	533.026	527.465	664.386	1177.37	589.95	808.746
AT1G07880	17.6669	0.125885	1.93215	0.0651528	0.948052	0.993197	48.1204	2.51573	0	21.782	33.5835	0
AT1G07885	0	NA	NA	NA	NA	NA	0	0	0	0	0	0
AT1G07890	10541.9	0.429948	0.277197	1.55106	0.120888	0.552555	7993.54	9722.47	9232.24	14409.4	6788.34	15105.6
AT1G07900	437.745	-0.748634	0.487356	-1.53611	0.124511	0.558915	744.941	230.609	671.722	184.574	270.907	523.718
AT1G07901	48.6348	-0.276914	0.811015	-0.341442	0.732771	0.958663	31.4633	31.0274	97.4573	47.0033	48.1363	36.7214
AT1G07910	158.222	0.54465	0.533647	1.02062	0.307435	0.779604	124.928	123.271	138.326	111.203	129.856	321.75
AT1G07920	2737.31	-0.355543	0.333394	-1.06644	0.286227	0.763998	2667.91	3173.18	3378.52	2506.08	1144.08	3554.11
AT1G07930	1320.05	-0.0797521	0.324264	-0.245948	0.805722	0.973691	1361.25	1588.27	1120.23	1539.64	695.178	1615.74
AT1G07940	1132.43	-0.206548	0.353415	-0.584434	0.558928	0.912319	905.034	1289.73	1446.14	983.63	578.755	1591.26
AT1G07950	216.762	0.304189	0.499115	0.609457	0.542222	0.905527	279.468	156.814	145.662	343.926	122.02	252.679
AT1G07960	712.294	0.0846459	0.278202	0.304261	0.760929	0.964289	872.645	649.059	552.258	734.856	756.748	708.199
AT1G07970	139.245	-0.407846	0.506873	-0.804632	0.421032	0.857473	138.809	176.94	160.333	115.789	170.156	73.4429
AT1G07980	353.525	0.722214	0.344194	2.09827	0.0358811	0.315046	261.886	290.986	247.311	398.955	573.158	348.854
AT1G07985	50.4652	-0.50445	1.28904	-0.391338	0.695548	0.951846	128.63	14.2558	34.5816	92.8601	32.464	0
AT1G07990	603.209	-0.562423	0.276239	-2.036	0.0417506	0.337061	855.062	618.87	684.297	473.472	461.213	526.341
AT1G08000	172.08	-0.346423	0.436021	-0.794511	0.426898	0.859995	226.721	158.491	192.819	175.402	116.423	162.624
AT1G08005	0.897113	-0.488266	3.93464	-0.124094	0.901241	NA	0	0	3.14378	0	2.2389	0
AT1G08010	572.471	-0.397661	0.276167	-1.43993	0.149887	0.604462	613.535	749.688	588.935	498.693	540.694	443.28
AT1G08030	436.408	-0.458823	0.426719	-1.07524	0.282269	0.761314	741.239	286.793	487.286	498.693	380.613	223.826
AT1G08032	0	NA	NA	NA	NA	NA	0	0	0	0	0	0
AT1G08035	10.4098	-3.16843	2.09645	-1.51133	0.130705	0.568736	35.1649	20.1259	1.04793	0	0	6.12024
AT1G08040	361.298	-0.172348	0.305782	-0.563631	0.573006	0.918991	416.426	370.651	361.535	338.194	326.879	354.1
AT1G08050	6.83655	-4.14067	2.66943	-1.55114	0.120867	0.552555	0	25.1573	13.6231	0	2.2389	0
AT1G08060	109.962	0.173893	0.646551	0.268956	0.787964	0.968489	94.39	89.7278	125.751	92.8601	211.576	45.4646
AT1G08065	0.154232	-0.806974	4.08047	-0.197765	0.843229	NA	0.925392	0	0	0	0	0
AT1G08070	48.261	0.123632	0.998608	0.123804	0.90147	0.987108	83.2853	16.7715	38.7733	16.0499	20.1501	114.536
AT1G08080	0.308464	-1.69267	4.03906	-0.419074	0.675162	NA	1.85078	0	0	0	0	0
AT1G08090	0.873273	-3.18303	3.95439	-0.804935	0.420857	NA	0	0	5.23964	0	0	0
AT1G08100	0	NA	NA	NA	NA	NA	0	0	0	0	0	0
AT1G08105.1	0.460138	-0.752843	4.0371	-0.186481	0.852067	NA	0	0.838577	1.04793	0	0	0.87432
AT1G08110	1478.5	0.442184	0.243039	1.81939	0.0688515	0.434077	1431.58	1072.54	1257.51	1721.93	1387	2000.44
AT1G08115	6.65786	3.16367	2.11816	1.49359	0.135282	0.57794	0.925392	0	3.14378	6.87853	24.6279	4.3716
AT1G08120	6.96595	6.34459	2.8778	2.20467	0.0274772	0.276315	0	0	0	0	11.1945	30.6012
AT1G08125	370.54	0.681885	0.328478	2.07589	0.0379039	0.323342	216.542	301.888	335.337	452.837	484.721	431.914
AT1G08130	101.631	-0.155755	0.67568	-0.230516	0.817691	0.976574	81.4345	124.948	115.272	30.9534	88.4365	168.744
AT1G08135	1.23386	-3.69107	3.94032	-0.936744	0.34889	NA	7.40314	0	0	0	0	0
AT1G08140	0	NA	NA	NA	NA	NA	0	0	0	0	0	0
AT1G08150	2.14478	-4.48863	3.92611	-1.14328	0.252924	NA	12.0301	0.838577	0	0	0	0
AT1G08160	0	NA	NA	NA	NA	NA	0	0	0	0	0	0
AT1G08165	0	NA	NA	NA	NA	NA	0	0	0	0	0	0
AT1G08170	0	NA	NA	NA	NA	NA	0	0	0	0	0	0
AT1G08180	79.2678	0.961628	0.724124	1.32799	0.184182	0.65291	64.7775	53.669	42.965	131.838	30.2251	152.132
AT1G08190	748.602	0.37875	0.328316	1.15362	0.248658	0.727533	813.42	614.677	523.964	887.33	1104.9	547.324
AT1G08200	2928.74	0.853312	0.244082	3.49601	0.000472267	0.019169	2059.92	1775.27	2425.95	4894.07	3204.98	3212.25
AT1G08210	251.323	-0.0919345	0.452992	-0.20295	0.839174	0.97754	326.663	217.192	233.688	322.144	283.221	125.028
AT1G08220	136.319	-0.593665	0.519795	-1.14211	0.253407	0.7326	166.571	179.456	145.662	80.2495	169.037	76.9402
AT1G08230	1616.21	-0.628823	0.209441	-3.00239	0.00267872	0.0642768	1872.07	2182.82	1833.87	1193.42	1325.43	1289.62
AT1G08240	0	NA	NA	NA	NA	NA	0	0	0	0	0	0
AT1G08250	371.73	0.147699	0.359149	0.411247	0.680892	0.94816	311.857	271.699	474.711	395.515	460.094	316.504
AT1G08260	66.0455	-0.563331	0.709479	-0.794006	0.427192	0.859995	117.525	49.4761	69.1632	69.9317	60.4502	29.7269
AT1G08270	32.0664	1.32998	1.13942	1.16724	0.243112	0.723213	17.5825	1.67715	35.6295	74.5174	20.1501	42.8417
AT1G08280	33.2308	-1.20958	1.29318	-0.935355	0.349605	0.813214	78.6583	35.2203	25.1503	43.564	16.7917	0
AT1G08290	2.09012	-2.21464	3.87873	-0.570971	0.568019	NA	9.25392	0	1.04793	0	2.2389	0
AT1G08300	33.6827	0.727755	1.04556	0.696043	0.486402	0.885964	35.1649	7.5472	33.5337	44.7104	11.1945	69.9456
AT1G08310	309.681	-1.0318	0.474111	-2.17629	0.0295336	0.286732	513.593	401.679	333.241	96.2994	167.917	345.356
AT1G08315	419.729	0.0333301	0.301741	0.110459	0.912045	0.989493	429.382	365.62	449.561	478.058	419.793	375.958
AT1G08320	16.9981	-7.47511	1.84308	-4.05578	5e-05	0.00347587	21.284	50.3146	30.3899	0	0	0
AT1G08340	3.80092	-0.254413	2.92939	-0.0868485	0.930792	0.99178	0.925392	0	11.5272	0	3.35835	6.99456
AT1G08350	163.795	-0.04563	0.4692	-0.0972506	0.922527	0.990766	203.586	116.562	179.196	188.013	115.303	180.11
AT1G08360	1537.44	0.118171	0.354656	0.3332	0.738983	0.959603	1724.93	1348.43	1350.78	1660.02	742.195	2398.26
AT1G08370	623.631	0.256952	0.279061	0.920774	0.357168	0.817266	551.534	510.694	642.38	799.056	667.192	570.931
AT1G08380	42621.5	0.231569	0.255681	0.905696	0.365097	0.823278	33197.5	45454.3	38973.5	45150.7	30655	62297.9
AT1G08390	358.551	0.516795	0.412803	1.25192	0.210599	0.684224	158.242	311.112	416.027	444.812	327.999	493.117
AT1G08400	144.322	-0.166002	0.558284	-0.297343	0.766204	0.964303	74.9568	228.932	154.045	138.717	91.7948	177.487
AT1G08410	230.741	0.284202	0.391768	0.725435	0.468185	0.880061	182.302	245.703	195.962	238.456	315.685	206.34
AT1G08420	203.514	-0.190236	0.43932	-0.433024	0.664997	0.944787	248.005	252.412	149.854	220.113	216.054	134.645
AT1G08430	0	NA	NA	NA	NA	NA	0	0	0	0	0	0
AT1G08440	0	NA	NA	NA	NA	NA	0	0	0	0	0	0
AT1G08450	2914.71	-0.398247	0.209075	-1.9048	0.0568055	0.396692	3618.28	3467.52	2856.65	2765.17	2610.56	2170.06
AT1G08460	324.004	0.0514352	0.431824	0.119111	0.905187	0.987744	297.051	378.198	279.797	312.973	172.395	503.608
AT1G08465	164.032	-0.561649	0.463899	-1.21071	0.226005	0.705012	205.437	233.125	147.758	129.546	171.276	97.0495
AT1G08470	98.1942	-0.000553195	0.605136	-0.000914165	0.999271	0.999607	99.9424	104.822	90.1218	88.2745	50.3752	155.629
AT1G08480	910.953	0.372083	0.280741	1.32536	0.185052	0.653309	727.358	667.508	988.196	1117.76	795.928	1168.97
AT1G08490	1274.41	-0.058007	0.290262	-0.199844	0.841603	0.97754	944.825	1470.86	1483.87	1631.36	1176.54	939.02
AT1G08500	18.1329	-1.90998	1.55172	-1.23088	0.218369	0.695536	2.77618	36.0588	47.1567	0	12.3139	10.4918
AT1G08510	1149.5	0.0259447	0.241228	0.107552	0.914351	0.989493	1353.85	1116.99	946.279	1146.42	1241.47	1092.03
AT1G08520	1519.25	-0.185038	0.247747	-0.746883	0.455134	0.87308	1550.96	1985.75	1312.01	1469.71	1589.62	1207.44
AT1G08530	369.583	-0.258423	0.350113	-0.738114	0.460445	0.876717	298.902	384.907	523.964	386.344	331.357	292.023
AT1G08540	561.972	0.0226027	0.297962	0.0758578	0.939532	0.992652	538.578	701.051	432.794	574.357	526.141	598.909
AT1G08550	1044.99	0.491764	0.301622	1.6304	0.103018	0.516214	671.835	749.688	1185.21	1074.2	1038.85	1550.17
AT1G08560	86.223	0.319137	1.20601	0.264621	0.791301	0.970158	24.0602	195.389	10.4793	246.481	39.1807	1.74864
AT1G08570	2864.7	0.105574	0.209835	0.503129	0.614873	0.931069	2655.88	3023.07	2599.91	3285.64	3174.76	2448.97
AT1G08580	611.905	-0.219828	0.322445	-0.681754	0.495395	0.888986	558.937	870.443	545.97	421.883	612.339	661.86
AT1G08590	5.52644	-0.657697	2.35571	-0.279193	0.780097	0.967206	19.4332	0.838577	0	8.02495	2.2389	2.62296
AT1G08592	0	NA	NA	NA	NA	NA	0	0	0	0	0	0
AT1G08600	295.635	-0.326656	0.42475	-0.769053	0.441862	0.868008	382.187	321.175	282.94	368.001	278.743	140.766
AT1G08610	79.585	-2.04285	0.89854	-2.27352	0.022995	0.250436	143.436	110.692	129.943	4.58569	78.3614	10.4918
AT1G08620	393.379	0.299654	0.40603	0.738008	0.46051	0.876717	486.756	295.179	275.605	519.329	535.097	248.307
AT1G08630	59.5568	-2.26051	0.840363	-2.68993	0.00714675	0.119943	32.3887	171.908	91.1697	16.0499	33.5835	12.2405
AT1G08640	1241.13	-0.172728	0.275069	-0.627943	0.530041	0.900365	1153.96	1444.87	1346.59	1584.35	980.637	936.397
AT1G08650	1562.76	0.558216	0.398381	1.40121	0.16115	0.62029	1175.25	1187.43	1429.37	1499.52	3306.85	778.145
AT1G08660	1304.31	0.15819	0.234946	0.673305	0.500753	0.890014	1396.42	1182.39	1120.23	1227.82	1288.49	1610.5
AT1G08670	5.5042	4.99786	3.31426	1.50799	0.131558	0.57037	0.925392	0	0	32.0998	0	0
AT1G08680	374.009	0.183601	0.313816	0.585059	0.558508	0.912319	365.53	339.624	345.816	327.877	417.554	447.652
AT1G08695	2.315	-1.07941	3.45797	-0.312151	0.754926	NA	6.47775	0.838577	2.09585	0	4.4778	0
AT1G08700	214.489	0.0448077	0.403734	0.110983	0.91163	0.98933	220.243	174.424	238.927	265.97	167.917	219.454
AT1G08710	548.225	0.574451	0.390513	1.47102	0.141286	0.589523	284.095	563.524	473.663	442.519	989.593	535.958
AT1G08720	477.584	1.247	0.304883	4.09009	4.31e-05	0.00308257	270.215	342.14	236.832	592.7	663.833	759.784
AT1G08730	4.98569	-1.22807	3.40269	-0.36091	0.718167	0.957581	0	0	20.9585	0	8.95559	0
AT1G08735.1	0	NA	NA	NA	NA	NA	0	0	0	0	0	0
AT1G08740.1	0	NA	NA	NA	NA	NA	0	0	0	0	0	0
AT1G08750	316.057	-0.564625	0.382569	-1.47588	0.139977	0.587191	421.979	415.096	294.468	167.378	296.654	300.766
AT1G08760	194.097	-0.95787	0.479596	-1.99724	0.0457986	0.355313	254.483	282.601	231.592	74.5174	205.979	115.41
AT1G08770	455.684	0.0699357	0.390586	0.179053	0.857896	0.980299	362.754	539.205	431.746	692.439	266.429	441.532
AT1G08780	354.224	0.384103	0.343328	1.11877	0.26324	0.742869	349.798	264.99	307.043	507.865	373.896	321.75
AT1G08790	0	NA	NA	NA	NA	NA	0	0	0	0	0	0
AT1G08800	332.191	-0.0385333	0.394167	-0.0977589	0.922124	0.990766	425.68	229.77	354.199	378.319	383.971	221.203
AT1G08810	485.334	-0.526954	0.402656	-1.3087	0.190638	0.659175	662.581	549.268	507.197	192.599	595.547	404.81
AT1G08820	467.428	0.526259	0.29668	1.77383	0.0760921	0.456199	455.293	321.175	373.062	541.111	527.26	586.669
AT1G08830	3110.97	0.0709275	0.238945	0.296836	0.766592	0.964303	3225.92	3169.82	2707.84	3754.53	2278.08	3529.63
AT1G08840	225.42	-0.40323	0.479527	-0.84089	0.400409	0.843526	355.351	217.192	198.058	160.499	119.781	301.64
AT1G08845	232.913	-0.409704	0.615249	-0.665916	0.505465	0.891615	152.69	235.64	408.692	221.259	330.237	48.9619
AT1G08860	0	NA	NA	NA	NA	NA	0	0	0	0	0	0
AT1G08870	0	NA	NA	NA	NA	NA	0	0	0	0	0	0
AT1G08880	601.412	0.394161	0.459834	0.857179	0.391346	0.836545	322.036	668.346	569.025	933.187	240.682	875.194
AT1G08890	1288.89	0.544438	0.286022	1.90348	0.0569774	0.397204	1153.04	800.003	1192.54	1419.27	2016.13	1152.35
AT1G08900	3320.49	0.0302936	0.224126	0.135163	0.892483	0.98561	3298.1	3171.5	3386.9	2960.06	4291.97	2814.44
AT1G08910	1000.77	0.193049	0.252151	0.765609	0.443909	0.86847	1004.05	858.703	938.943	906.819	1306.4	989.73
AT1G08920	1042.49	-0.179445	0.265128	-0.676823	0.498519	0.889347	1153.96	1002.94	1164.25	1061.59	1155.27	716.943
AT1G08930	16538.9	-0.493089	0.233212	-2.11434	0.0344864	0.309105	22465.7	17353.5	18194.1	13218.2	17772.4	10229.5
AT1G08940	457.689	0.00022499	0.310489	0.000724632	0.999422	0.999607	471.95	469.603	431.746	347.366	474.646	550.822
AT1G08950	0	NA	NA	NA	NA	NA	0	0	0	0	0	0
AT1G08960	121.287	-0.508356	0.536998	-0.946662	0.343811	0.81036	106.42	124.109	197.01	66.4924	120.9	112.787
AT1G08970	396.313	-0.52462	0.397935	-1.31836	0.187384	0.655612	477.502	454.509	471.567	209.795	245.159	519.346
AT1G08980	2212.85	0.100118	0.249117	0.401893	0.687763	0.950159	2209.84	1882.61	2315.92	1778.1	3000.12	2090.5
AT1G08985	21.9574	-1.18606	1.87502	-0.632557	0.527023	0.899534	51.822	38.5746	1.04793	0	40.3002	0
AT1G08990	1.09153	-3.51327	3.9447	-0.890632	0.373126	NA	2.77618	1.67715	2.09585	0	0	0
AT1G09000	10.5448	-0.334786	2.03407	-0.164589	0.869267	0.982336	24.9856	0.838577	9.43135	1.14642	26.8668	0
AT1G09010	875.988	0.111712	0.268056	0.416748	0.676863	0.947368	991.095	849.479	685.345	1067.32	781.375	881.315
AT1G09020	530.374	-0.466705	0.404301	-1.15435	0.248357	0.727189	604.281	838.577	403.452	530.793	235.084	570.057
AT1G09026	0	NA	NA	NA	NA	NA	0	0	0	0	0	0
AT1G09030	0	NA	NA	NA	NA	NA	0	0	0	0	0	0
AT1G09040	42.6531	-1.12769	1.276	-0.883763	0.376824	0.829821	36.0903	11.7401	127.847	0	47.0169	33.2242
AT1G09050	37.971	-1.37644	1.26156	-1.09106	0.275245	0.75609	52.7474	94.7592	16.7668	36.6855	26.8668	0
AT1G09060	284.168	-0.211327	0.383361	-0.551247	0.581465	0.921546	388.665	249.896	276.653	208.649	246.279	334.865
AT1G09070	22528.2	-0.398579	0.202309	-1.97016	0.0488205	0.3685	22848.9	27266.3	26747.3	15414.8	20453.5	22438.6
AT1G09080	62.194	1.16079	0.998135	1.16296	0.244847	0.723845	9.25392	62.0547	44.013	8.02495	146.648	103.17
AT1G09090	0.186575	1.11658	4.08047	0.27364	0.784361	NA	0	0	0	0	1.11945	0
AT1G09100	157.783	-0.283937	0.423423	-0.670576	0.502491	0.890616	193.407	161.845	164.525	145.596	138.812	142.514
AT1G09110	0	NA	NA	NA	NA	NA	0	0	0	0	0	0
AT1G09130	1286.96	0.1263	0.271763	0.464743	0.642115	0.937004	1263.16	1211.74	1216.64	1845.74	1060.12	1124.38
AT1G09140	5201.51	-0.0361215	0.219239	-0.164759	0.869134	0.982297	5749.46	4969.41	5081.4	5800.89	3853.14	5754.78
AT1G09150	472.042	0.500563	0.367088	1.36361	0.172691	0.634255	381.262	430.19	361.535	678.682	305.61	674.975
AT1G09155	0.955351	3.46895	3.95531	0.877037	0.380466	NA	0	0	0	5.73211	0	0
AT1G09157	37.7477	0.201184	1.00207	0.200769	0.840879	0.97754	12.9555	58.7004	33.5337	77.9567	30.2251	13.1148
AT1G09160	1242.28	0.549085	0.21281	2.58017	0.00987509	0.148378	970.736	1030.61	1024.87	1494.93	1385.88	1546.67
AT1G09170	1.07177	-0.906622	3.91457	-0.231602	0.816847	NA	0	0	4.19171	0	2.2389	0
AT1G09176	9.99119	3.28914	1.96573	1.67324	0.0942801	0.497911	5.55235	0	0	14.9035	24.6279	14.8634
AT1G09180	167.086	1.08663	0.54889	1.97969	0.0477385	0.363538	124.003	119.078	77.5466	398.955	142.17	140.766
AT1G09190	67.8716	0.407757	0.724276	0.562986	0.573444	0.918991	35.1649	103.984	35.6295	79.1031	97.3921	55.9565
AT1G09195	192.162	0.129972	0.496212	0.261929	0.793376	0.970605	272.991	134.172	143.566	118.081	230.606	253.553
AT1G09200	437.469	-0.228367	0.516366	-0.442257	0.658303	0.942584	192.482	786.586	436.986	529.647	174.634	504.483
AT1G09210	621.758	-0.15268	0.287563	-0.530944	0.595457	0.925004	657.954	553.461	752.412	716.513	531.738	518.472
AT1G09220	21.3419	-0.844785	1.46406	-0.577016	0.563929	0.913929	22.2094	48.6375	11.5272	0	8.95559	36.7214
AT1G09230	1395.98	-0.00702156	0.207722	-0.0338028	0.973034	0.996461	1439.91	1354.3	1404.22	1372.27	1323.19	1481.97
AT1G09240	683.856	-1.17991	0.386989	-3.04894	0.00229648	0.0573011	1126.2	652.413	1068.89	431.054	216.054	608.527
AT1G09245	0.698618	-2.85905	3.96629	-0.720838	0.471009	NA	0	0	4.19171	0	0	0
AT1G09250	1282.15	-0.538775	0.252964	-2.12985	0.0331841	0.30396	1831.35	1241.93	1483.87	984.776	919.068	1231.92
AT1G09260	1.85078	-4.27581	3.92917	-1.08822	0.276497	NA	11.1047	0	0	0	0	0
AT1G09270	734.107	-0.103209	0.292659	-0.352659	0.724344	0.957972	750.493	779.877	750.316	590.407	958.248	575.303
AT1G09280	307.49	0.656145	0.389137	1.68615	0.0917662	0.493183	262.811	180.294	273.509	248.773	451.138	428.417
AT1G09290	180.384	-0.576648	0.443531	-1.30013	0.193556	0.663831	172.123	246.542	229.496	102.032	151.126	180.984
AT1G09300	182.671	0.323316	0.457469	0.70675	0.479722	0.885179	192.482	185.326	108.984	144.449	233.965	230.821
AT1G09310	12054.4	0.265334	0.325602	0.814902	0.415129	0.854224	11172.3	10110.7	11564.9	14616.9	5812.18	19049.7
AT1G09320	112.688	0.450891	0.555238	0.812069	0.416752	0.854373	66.6282	96.4364	122.608	98.5923	186.948	104.918
AT1G09330	637.585	0.156061	0.329019	0.474323	0.635269	0.934924	606.132	648.22	554.354	722.246	881.006	413.553
AT1G09340	7483.55	0.239859	0.252314	0.950638	0.341788	0.809323	5550.5	7914.49	7123.81	9715.92	5457.31	9139.27
AT1G09350	48.2202	2.47219	1.38063	1.79062	0.0733538	0.447708	0	37.736	6.28756	190.306	51.4947	3.49728
AT1G09360	0	NA	NA	NA	NA	NA	0	0	0	0	0	0
AT1G09370	0	NA	NA	NA	NA	NA	0	0	0	0	0	0
AT1G09380	2.94334	4.05385	3.92345	1.03324	0.301493	NA	0	0	1.04793	0	0	16.6121
AT1G09390	504.236	0.481116	0.363706	1.32281	0.185897	0.65411	372.933	450.316	440.13	450.544	415.316	896.178
AT1G09400	68.7162	0.497571	0.659208	0.754801	0.450368	0.871094	71.2552	57.8618	41.9171	57.3211	69.4058	114.536
AT1G09410	36.8608	-0.0298774	1.3468	-0.022184	0.982301	0.996915	0	72.9562	38.7733	6.87853	57.0919	45.4646
AT1G09415	540.351	-0.647979	0.38088	-1.70127	0.0888927	0.486811	633.894	660.799	685.345	248.773	339.193	674.101
AT1G09420	182.042	0.226833	0.44207	0.513115	0.607871	0.929132	192.482	156.814	154.045	239.602	129.856	219.454
AT1G09421	0	NA	NA	NA	NA	NA	0	0	0	0	0	0
AT1G09430	1091.59	-0.231116	0.262563	-0.880233	0.378733	0.830111	1171.55	1385.33	978.764	1018.02	1188.85	806.998
AT1G09440	104.662	0.346187	0.626335	0.552719	0.580456	0.921417	99.017	98.1136	79.6425	60.7603	80.6003	209.837
AT1G09450	0.698618	-2.85905	3.96629	-0.720838	0.471009	NA	0	0	4.19171	0	0	0
AT1G09460	0	NA	NA	NA	NA	NA	0	0	0	0	0	0
AT1G09470	1.22258	-3.67086	3.94079	-0.931503	0.351593	NA	0	0	7.33549	0	0	0
AT1G09480	210.383	-0.544338	0.447671	-1.21593	0.224011	0.702223	332.216	183.648	232.64	200.624	200.381	112.787
AT1G09483	0.835846	-0.324566	3.94418	-0.0822897	0.934416	NA	2.77618	0	0	0	2.2389	0
AT1G09486	55.7271	2.09364	0.842064	2.48631	0.0129074	0.175851	24.0602	9.22435	30.3899	30.9534	108.587	131.148
AT1G09490	2156.18	-0.330189	0.233618	-1.41337	0.157546	0.61576	2877.97	2138.37	2189.12	1619.89	2266.88	1844.82
AT1G09500	899.021	-0.262109	0.294778	-0.889172	0.373911	0.828321	1018.86	877.152	1044.78	865.548	1042.21	545.576
AT1G09510	11.5711	-0.953842	1.72047	-0.554409	0.579299	0.921301	26.8364	12.5787	6.28756	9.17137	14.5528	0
AT1G09520	483.815	-0.216772	0.30687	-0.706398	0.479941	0.885179	484.906	589.52	486.238	377.173	406.36	558.691
AT1G09530	1020.28	-0.990489	0.377689	-2.6225	0.00872872	0.137346	2133.03	1179.04	759.747	515.89	948.173	585.795
AT1G09540	0.154232	-0.806974	4.08047	-0.197765	0.843229	NA	0.925392	0	0	0	0	0
AT1G09550	0	NA	NA	NA	NA	NA	0	0	0	0	0	0
AT1G09560	1452.16	-0.529891	0.219462	-2.4145	0.0157568	0.198739	1798.96	1892.67	1455.57	1208.33	1198.93	1158.47
AT1G09570	1188.49	-0.485942	0.281549	-1.72596	0.0843545	0.475016	1138.23	1710.7	1312.01	780.713	902.276	1287
AT1G09575	1066.36	-0.266131	0.331743	-0.802221	0.422425	0.857791	893.929	1324.95	1275.33	631.678	826.153	1446.13
AT1G09580	127.004	0.0967934	0.475797	0.203434	0.838796	0.97754	134.182	137.527	96.4093	139.863	122.02	132.022
AT1G09590	1253.04	-0.019513	0.27095	-0.0720169	0.942588	0.992792	1303.88	1281.35	1199.88	1285.14	861.976	1586.02
AT1G09600	0	NA	NA	NA	NA	NA	0	0	0	0	0	0
AT1G09610	9.04198	0.113881	2.51909	0.0452072	0.963942	0.995442	0	25.9959	0	11.4642	16.7917	0
AT1G09620	442.506	-0.340624	0.355661	-0.957721	0.338203	0.806939	401.62	482.182	600.462	283.166	348.149	539.456
AT1G09625	4.62696	-5.59746	3.82748	-1.46244	0.143621	0.592967	27.7618	0	0	0	0	0
AT1G09630	178.998	0.320199	0.468725	0.683126	0.494527	0.888738	187.855	102.306	187.579	262.531	154.484	179.236
AT1G09640	535.884	-0.439916	0.294184	-1.49538	0.134816	0.576646	516.369	567.717	767.083	479.204	419.793	465.138
AT1G09645	685.011	0.0115317	0.302902	0.0380707	0.969631	0.996461	571.892	713.629	760.795	770.395	811.601	481.75
AT1G09650	7.05563	-0.923927	2.71695	-0.340061	0.733811	0.958751	0	27.6731	0	4.58569	10.075	0
AT1G09660	745.996	-0.205271	0.384926	-0.533272	0.593845	0.924297	867.092	638.157	891.786	347.366	1095.94	635.631
AT1G09665	3.91807	5.51084	3.91861	1.40633	0.159627	0.618425	0	0	0	0	23.5084	0
AT1G09680	54.2228	1.08734	0.775329	1.40243	0.160788	0.620065	50.8966	35.2203	17.8148	98.5923	81.7198	41.093
AT1G09690	3589.72	0.137966	0.199081	0.693014	0.488301	0.886649	3591.45	3296.45	3366.99	4107.63	3143.41	4032.36
AT1G09700	54.1026	0.721689	0.818249	0.881992	0.377781	0.829821	44.4188	44.4446	33.5337	41.2712	132.095	28.8526
AT1G09710	181.332	0.114823	0.443123	0.259123	0.79554	0.971421	198.034	145.074	179.196	255.652	142.17	167.869
AT1G09720	7.14028	6.38054	3.30868	1.92842	0.0538027	0.386228	0	0	0	0	0	42.8417
AT1G09730	600.521	0.116224	0.306676	0.37898	0.704703	0.955057	428.457	602.099	698.968	517.036	629.13	727.434
AT1G09740	322.255	-0.0728245	0.353118	-0.206233	0.836609	0.977513	317.41	412.58	260.934	268.263	360.463	313.881
AT1G09750	219.257	0.0969357	0.479983	0.201956	0.839951	0.97754	167.496	302.726	165.573	222.406	132.095	325.247
AT1G09760	357.713	0.474634	0.362235	1.31029	0.190096	0.658294	363.679	319.498	214.825	484.936	315.685	447.652
AT1G09770	792.02	-0.244003	0.291722	-0.836421	0.402918	0.845848	1129.9	626.417	820.527	687.853	699.656	787.762
AT1G09780	829.536	0.163208	0.2732	0.597396	0.550243	0.908512	708.85	874.636	763.939	1107.44	799.287	723.063
AT1G09790	0.29144	1.79879	4.05905	0.443155	0.657654	NA	0	0	0	0	0	1.74864
AT1G09794	101.723	-0.0838906	0.581948	-0.144155	0.885378	0.984549	137.883	105.661	70.2111	107.764	127.617	61.2024
AT1G09795	806.757	0.136487	0.378072	0.361009	0.718093	0.957581	612.61	1028.1	664.386	1331	713.089	491.368
AT1G09800	183.713	0.650549	0.5084	1.2796	0.200686	0.673517	158.242	197.904	72.307	276.288	246.279	151.257
AT1G09810	219.219	-0.111884	0.433142	-0.258307	0.79617	0.971639	307.23	232.286	143.566	222.406	174.634	235.192
AT1G09812	0	NA	NA	NA	NA	NA	0	0	0	0	0	0
AT1G09815	264.058	-0.420525	0.345195	-1.21822	0.223139	0.701306	313.708	323.691	269.317	218.967	233.965	224.7
AT1G09820	33.0111	0.918268	1.23352	0.744427	0.456618	0.874158	15.7317	40.2517	12.5751	1.14642	39.1807	89.1807
AT1G09830	198.994	-0.650776	0.436183	-1.49198	0.135704	0.57855	180.451	320.337	228.448	191.452	122.02	151.257
AT1G09840	852.966	0.252489	0.319352	0.790629	0.429161	0.860598	845.808	683.441	805.856	889.623	1306.4	586.669
AT1G09850	273.182	-0.621873	0.406691	-1.52911	0.126238	0.561986	260.035	304.404	429.65	194.892	158.962	291.149
AT1G09860	14.4731	0.973292	2.25003	0.432569	0.665328	0.944915	0	0	29.342	17.1963	40.3002	0
AT1G09870	1045.36	0.0181362	0.253849	0.071445	0.943044	0.992792	969.811	1137.95	1009.15	949.237	898.918	1307.11
AT1G09880	25.1601	-0.333247	1.85497	-0.179652	0.857426	0.980008	0	48.6375	35.6295	0	1.11945	65.574
AT1G09890	0.308464	-1.69267	4.03906	-0.419074	0.675162	NA	1.85078	0	0	0	0	0
AT1G09900	50.9177	-1.08129	0.886063	-1.22033	0.222341	0.700239	99.9424	30.1888	77.5466	35.5391	8.95559	53.3335
AT1G09910	369.219	-0.0681587	0.317111	-0.214936	0.829817	0.977513	406.247	333.754	394.021	393.223	303.371	384.701
AT1G09920	732.883	-0.125821	0.305142	-0.412335	0.680094	0.948031	650.551	1011.32	631.9	865.548	642.564	595.412
AT1G09930	47.7375	0.799027	0.894038	0.893728	0.371467	0.826468	21.284	62.0547	20.9585	103.178	57.0919	21.858
AT1G09932	238.028	1.10533	0.501281	2.20502	0.0274527	0.276315	225.796	105.661	121.56	530.793	220.531	223.826
AT1G09935	0	NA	NA	NA	NA	NA	0	0	0	0	0	0
AT1G09940	2790.33	0.313534	0.219585	1.42784	0.153336	0.609002	2036.79	2462.06	2966.68	2754.85	3274.39	3247.23
AT1G09950	3576.21	0.258864	0.252258	1.02619	0.304802	0.776762	2177.45	3701.48	3889.91	3481.68	4358.02	3848.76
AT1G09960	10.5602	-0.531428	1.88936	-0.281275	0.7785	0.966862	0.925392	17.6101	18.8627	9.17137	16.7917	0
AT1G09970	6232.8	-0.0732234	0.20036	-0.365458	0.714769	0.957581	5459.81	6130.84	7582.8	5546.39	6405.49	6271.5
AT1G09980	672.194	0.432694	0.339713	1.27371	0.202768	0.67408	532.101	635.642	548.066	1137.25	681.744	498.362
AT1G09995	323.48	0.402986	0.334483	1.2048	0.22828	0.705641	261.886	326.207	247.311	374.88	409.718	320.876
AT1G10000	105.535	0.0501401	0.570767	0.0878468	0.929998	0.991769	140.66	72.1177	98.5052	67.6389	123.139	131.148
AT1G10010	0.722459	0.102994	3.97471	0.0259122	0.979327	NA	0	0	2.09585	0	2.2389	0
AT1G10020	594.06	0.988143	0.488879	2.02124	0.0432546	0.34318	98.0916	488.891	607.798	787.592	844.065	737.926
AT1G10030	105.409	-0.662951	0.624431	-1.06169	0.288378	0.765439	101.793	220.546	64.9715	99.7387	85.0781	60.3281
AT1G10040	59.1423	-1.4024	1.07773	-1.30126	0.193169	0.663046	110.122	72.1177	75.4508	0	32.464	64.6997
AT1G10050	198.411	0.339944	0.472058	0.720131	0.471444	0.881611	141.585	198.743	185.483	163.938	154.484	346.231
AT1G10060	4.2991	-5.49231	3.38563	-1.62224	0.104751	0.519357	15.7317	10.0629	0	0	0	0
AT1G10070	225.653	-0.578985	0.507375	-1.14114	0.253812	0.732778	188.78	278.408	343.72	298.07	88.4365	156.503
AT1G10090	688.426	0.817014	0.274858	2.97249	0.00295394	0.0679604	474.726	503.146	517.676	1082.22	718.686	834.101
AT1G10095	388.038	1.50323	0.476468	3.15494	0.00160531	0.0443986	107.345	222.223	277.701	298.07	928.023	494.865
AT1G10100	0	NA	NA	NA	NA	NA	0	0	0	0	0	0
AT1G10110	8.84123	-1.56828	2.13312	-0.735207	0.462213	0.877212	11.1047	20.1259	8.38342	0	13.4334	0
AT1G10120	160.159	0.517824	0.562764	0.920144	0.357498	0.817296	62.0013	168.554	164.525	130.692	294.415	140.766
AT1G10130	887.765	-0.0872241	0.263917	-0.330498	0.741023	0.959726	837.48	882.183	1024.87	692.439	847.423	1042.19
AT1G10140	1377.55	-0.400808	0.242945	-1.64979	0.0989865	0.507141	1249.28	1719.08	1734.32	1187.69	1338.86	1036.07
AT1G10150	659.468	0.0299881	0.27339	0.10969	0.912655	0.989493	682.014	547.591	728.31	624.8	769.061	605.03
AT1G10155	53.7864	0.640023	0.88182	0.725798	0.467963	0.880039	79.5837	27.6731	18.8627	22.9284	106.348	67.3227
AT1G10160.1	143.509	-0.995724	0.534136	-1.86418	0.0622967	0.41381	120.301	259.959	192.819	118.081	113.064	56.8308
AT1G10170	328.091	-0.0264144	0.427679	-0.0617622	0.950752	0.993742	268.364	254.089	471.567	273.995	220.531	480.002
AT1G10180	134.031	0.415025	0.518052	0.801125	0.423059	0.858115	67.5536	127.464	149.854	134.131	135.453	189.727
AT1G10190	0.285483	0.154807	4.08047	0.0379385	0.969737	NA	0	0.838577	0	0	0	0.87432
AT1G10200	1386.31	-0.110316	0.263544	-0.418585	0.675519	0.947368	1263.16	1541.31	1514.26	1149.86	1081.39	1767.88
AT1G10210	181.425	0.274118	0.433972	0.631649	0.527616	0.899534	140.66	194.55	157.189	243.041	207.098	146.011
AT1G10220	20.0714	-1.09674	1.42269	-0.770893	0.44077	0.867648	17.5825	36.0588	28.294	18.3427	20.1501	0
AT1G10230	84.3105	1.10209	0.677037	1.62782	0.103563	0.517564	25.911	42.7674	92.2176	146.742	118.662	79.5631
AT1G10240	67.94	0.704486	0.662094	1.06403	0.287316	0.764549	44.4188	64.5705	46.1088	69.9317	59.3308	123.279
AT1G10250	0	NA	NA	NA	NA	NA	0	0	0	0	0	0
AT1G10260.1	0.186575	1.11658	4.08047	0.27364	0.784361	NA	0	0	0	0	1.11945	0
AT1G10270	18.2478	-0.53416	1.68968	-0.316131	0.751903	0.961893	10.1793	37.736	16.7668	1.14642	43.6585	0
AT1G10280	92.9129	-0.0111976	0.688822	-0.0162561	0.98703	0.997179	56.4489	62.0547	161.381	61.9068	154.484	61.2024
AT1G10290	686.219	0.307155	0.339236	0.90543	0.365238	0.823278	846.734	453.67	539.683	1018.02	643.683	615.521
AT1G10300	0	NA	NA	NA	NA	NA	0	0	0	0	0	0
AT1G10310	523.447	0.580734	0.395094	1.46986	0.141599	0.589523	332.216	444.446	482.047	306.095	872.051	703.828
AT1G10320	918.783	0.39985	0.331952	1.20454	0.228379	0.705641	799.539	807.55	769.179	922.869	1576.18	637.379
AT1G10330	34.6101	-0.976413	1.03877	-0.939967	0.347234	0.812426	8.32853	94.7592	34.5816	25.2213	16.7917	27.9782
AT1G10340	85.9372	-1.15411	0.714174	-1.616	0.106093	0.521879	142.51	55.3461	158.237	20.6356	59.3308	79.5631
AT1G10350	212.302	0.156198	0.458043	0.341012	0.733094	0.958663	155.466	257.443	189.675	246.481	130.976	293.772
AT1G10360	575.914	-0.411248	0.405517	-1.01413	0.31052	0.781879	659.805	738.787	574.264	511.304	219.412	751.915
AT1G10370	1602.03	1.83601	0.357574	5.13465	2.83e-07	6.35e-05	800.464	549.268	753.46	4214.25	1746.34	1548.42
AT1G10380	8.44461	0.91547	2.59125	0.353293	0.723869	0.957972	17.5825	0	0	0	3.35835	29.7269
AT1G10385	0	NA	NA	NA	NA	NA	0	0	0	0	0	0
AT1G10390	634.71	0.216483	0.29477	0.734413	0.462697	0.877519	629.267	483.859	648.667	816.252	527.26	702.953
AT1G10400	20.3546	1.82672	1.42688	1.28022	0.200469	0.673517	10.1793	0	16.7668	55.0282	15.6723	24.481
AT1G10410	703.116	0.282842	0.309081	0.915105	0.360136	0.820175	663.506	581.134	658.098	996.24	808.242	511.477
AT1G10417	63.3538	-0.193303	0.711	-0.271875	0.785718	0.967552	59.2251	46.1218	97.4573	89.4209	38.0613	49.8362
AT1G10419	1.30602	3.92333	3.94226	0.9952	0.319639	NA	0	0	0	0	7.83614	0
AT1G10430	797.649	0.47402	0.260896	1.81689	0.0692338	0.435292	698.671	539.205	766.035	918.284	860.856	1002.85
AT1G10440	0	NA	NA	NA	NA	NA	0	0	0	0	0	0
AT1G10450	96.3063	-0.0122536	0.609407	-0.0201074	0.983958	0.997041	49.9712	138.365	101.649	124.96	85.0781	77.8145
AT1G10455	0	NA	NA	NA	NA	NA	0	0	0	0	0	0
AT1G10460	5.46511	0.695329	2.90396	0.239442	0.810763	0.974647	0	0	12.5751	0	4.4778	15.7378
AT1G10470	4599.51	-0.598356	0.35701	-1.67602	0.0937338	0.496733	4043.04	5092.68	7485.35	2025.73	2786.31	6163.96
AT1G10480	3.1408	-2.46237	3.13888	-0.784474	0.432762	NA	13.8809	0	2.09585	0	1.11945	1.74864
AT1G10490	153.502	-0.47461	0.510271	-0.930114	0.352312	0.81491	170.272	97.275	268.269	129.546	125.378	130.274
AT1G10500	310.109	0.232798	0.357756	0.650717	0.515229	0.894732	249.856	267.506	338.481	254.506	355.985	394.318
AT1G10510	426.57	0.55091	0.319241	1.72569	0.0844039	0.475016	327.589	360.588	350.008	639.703	396.285	485.248
AT1G10520	17.8115	-1.01157	1.71613	-0.58945	0.55556	0.910852	63.8521	3.35431	4.19171	0	30.2251	5.24592
AT1G10522	351.437	0.404279	0.315505	1.28137	0.200062	0.672954	277.618	310.274	319.618	452.837	362.701	385.575
AT1G10530	36.9572	0.837348	0.915567	0.914568	0.360419	0.820433	37.9411	22.6416	18.8627	71.0781	53.7336	17.4864
AT1G10538	0	NA	NA	NA	NA	NA	0	0	0	0	0	0
AT1G10540	1.5498	0.589951	3.84603	0.153392	0.878089	NA	3.70157	0	0	0	5.59725	0
AT1G10550	724.096	2.37896	0.540586	4.4007	1.08e-05	0.00107692	219.318	55.3461	426.506	803.641	1980.31	859.457
AT1G10560	133.943	0.205429	0.585932	0.350603	0.725886	0.957982	103.644	125.787	143.566	224.699	150.006	55.9565
AT1G10570	1297.98	0.195556	0.224896	0.869539	0.384552	0.833346	1320.53	1187.43	1122.33	1240.43	1567.23	1349.95
AT1G10580	764.786	0.191112	0.337626	0.566046	0.571362	0.917949	699.597	741.302	701.063	849.498	1137.36	459.892
AT1G10585	54.9554	-0.431758	0.732542	-0.589398	0.555594	0.910852	88.8377	51.1532	49.2526	38.9783	68.2864	33.2242
AT1G10586	8.62797	-6.49745	2.31178	-2.81058	0.00494517	0.0940766	22.2094	24.3187	5.23964	0	0	0
AT1G10588	1.11945	3.70032	3.94816	0.937228	0.348642	NA	0	0	0	0	6.71669	0
AT1G10590	2478.01	0.281259	0.216833	1.29712	0.194589	0.665022	1897.98	2372.34	2441.67	2311.19	2999	2845.91
AT1G10600	272.702	0.123996	0.392941	0.315559	0.752337	0.961893	302.603	216.353	264.078	201.77	379.493	271.914
AT1G10610	528.628	0.350707	0.365031	0.960758	0.336674	0.805959	572.818	368.135	452.705	801.349	623.533	353.225
AT1G10620	3.81493	4.45599	3.25206	1.37021	0.170623	0.630884	0.925392	0	0	0	4.4778	17.4864
AT1G10630	971.814	-0.298325	0.295348	-1.01008	0.312457	0.783994	950.378	1330.82	934.751	962.994	604.502	1047.44
AT1G10640	2.46771	-4.69073	3.92358	-1.19552	0.231883	NA	14.8063	0	0	0	0	0
AT1G10650	337.411	-0.305691	0.316035	-0.967272	0.333408	0.80291	410.874	374.844	333.241	311.827	295.535	298.143
AT1G10652	1.08076	-0.876519	3.91199	-0.22406	0.822711	NA	0	0	4.19171	2.29284	0	0
AT1G10657	45.6795	-0.051718	0.889033	-0.0581733	0.953611	0.994202	37.0157	41.9289	60.7798	38.9783	12.3139	83.0604
AT1G10660	287.712	-0.0165994	0.399828	-0.0415163	0.966884	0.996033	260.961	326.207	280.845	185.72	404.121	268.416
AT1G10670	1333.56	0.218291	0.2113	1.03308	0.301564	0.774428	1262.23	1272.12	1164.25	1454.81	1338.86	1509.08
AT1G10680	0	NA	NA	NA	NA	NA	0	0	0	0	0	0
AT1G10682	8.23509	-0.969653	2.57842	-0.376064	0.706869	0.955601	5.55235	0	27.2461	0	0	16.6121
AT1G10690	64.094	-1.04363	0.860181	-1.21327	0.225026	0.703971	141.585	12.5787	104.793	45.8569	44.778	34.9728
AT1G10700	1359.34	0.244043	0.258428	0.944335	0.344999	0.810855	926.318	1553.88	1253.32	1642.82	1402.67	1377.05
AT1G10705	0	NA	NA	NA	NA	NA	0	0	0	0	0	0
AT1G10710	1.54232	-4.01287	3.93363	-1.02014	0.307661	NA	9.25392	0	0	0	0	0
AT1G10717	0	NA	NA	NA	NA	NA	0	0	0	0	0	0
AT1G10720	983.625	0.180089	0.297829	0.604673	0.545396	0.907072	615.386	1049.9	1101.37	1126.93	1173.18	834.976
AT1G10730	145.794	0.20224	0.608839	0.332173	0.739758	0.959603	175.825	184.487	46.1088	136.424	226.129	105.793
AT1G10740	829.501	-0.0059429	0.286048	-0.0207759	0.983424	0.997041	883.75	941.722	667.53	1059.29	700.775	723.937
AT1G10745	0	NA	NA	NA	NA	NA	0	0	0	0	0	0
AT1G10747	0	NA	NA	NA	NA	NA	0	0	0	0	0	0
AT1G10750	0	NA	NA	NA	NA	NA	0	0	0	0	0	0
AT1G10760	1179.52	-0.136898	0.298102	-0.459232	0.646067	0.938726	1756.39	836.062	1113.95	1219.79	1046.68	1104.27
AT1G10770	8.25935	2.09527	2.9323	0.714549	0.474888	0.883914	0	0	9.43135	40.1248	0	0
AT1G10780	20.2215	-0.79875	1.45097	-0.550492	0.581982	0.921546	33.3141	26.8345	16.7668	32.0998	12.3139	0
AT1G10790	6.72996	1.33337	3.10252	0.429769	0.667364	0.945406	0	0	11.5272	0	0	28.8526
AT1G10800	2.17389	2.74551	3.90008	0.703963	0.481456	NA	0	1.67715	0	0	0	11.3662
AT1G10810	38.4725	0.36261	0.978716	0.370496	0.711013	0.956548	8.32853	31.0274	61.8277	26.3677	32.464	70.8199
AT1G10820	374.91	0.314889	0.356666	0.882868	0.377308	0.829821	381.262	217.192	404.5	386.344	398.524	461.641
AT1G10830	326.654	0.609763	0.361296	1.68771	0.091467	0.492368	174.899	278.408	322.762	403.54	377.254	403.062
AT1G10840	1168.98	-0.329308	0.259975	-1.26669	0.205266	0.676636	1075.31	1531.24	1299.43	935.48	901.156	1271.26
AT1G10850	55.4501	-1.25754	0.845061	-1.4881	0.136723	0.58014	141.585	67.9248	25.1503	35.5391	17.9112	44.5903
AT1G10865	652.186	0.190286	0.313263	0.607432	0.543564	0.905649	653.327	507.339	667.53	789.884	467.93	827.107
AT1G10870	241.117	-0.451279	0.401583	-1.12375	0.261119	0.740524	338.694	237.317	259.886	144.449	217.173	249.181
AT1G10880	0	NA	NA	NA	NA	NA	0	0	0	0	0	0
AT1G10890	5212.31	0.286363	0.214303	1.33625	0.181467	0.648523	5129.45	4183.66	4776.45	6069.16	6623.78	4491.38
AT1G10900	1479.97	-0.314881	0.254186	-1.23878	0.215426	0.691318	1658.3	1577.36	1687.16	948.091	1618.72	1390.17
AT1G10910	1030.92	-0.226284	0.229718	-0.98505	0.324599	0.795293	1139.16	1151.37	1043.74	1021.46	989.593	840.222
AT1G10920	816.712	0.0900128	0.250858	0.35882	0.71973	0.957581	917.989	675.055	780.706	873.573	840.706	812.243
AT1G10930	79.3758	0.528499	0.682192	0.774708	0.438512	0.866155	84.2107	72.1177	38.7733	64.1996	60.4502	156.503
AT1G10940	3370.21	0.029743	0.220577	0.134842	0.892737	0.985706	3634.94	3511.96	2858.75	4158.07	2995.65	3061.87
AT1G10950	809.296	-0.0306707	0.244646	-0.125367	0.900233	0.987108	789.36	907.341	756.604	875.866	766.823	759.784
AT1G10960	1766.97	0.385069	0.303773	1.26762	0.204934	0.676429	1252.98	1802.94	1541.5	2813.32	1236.99	1954.11
AT1G10970	51.1252	0.252583	0.849266	0.297413	0.766151	0.964303	18.5078	75.472	46.1088	35.5391	35.8224	95.3009
AT1G10980	3.02841	2.02583	3.16163	0.640753	0.521683	NA	0	2.51573	1.04793	2.29284	12.3139	0
AT1G10990	54.933	1.27156	0.831213	1.52976	0.126075	0.561846	19.4332	21.803	55.5402	83.6888	30.2251	118.908
AT1G11000	306.788	0.763631	0.418828	1.82326	0.0682643	0.432354	334.992	203.774	143.566	369.148	302.251	486.996
AT1G11010	0	NA	NA	NA	NA	NA	0	0	0	0	0	0
AT1G11020	271.935	-0.264563	0.441586	-0.599121	0.549092	0.908507	260.961	351.364	277.701	395.515	158.962	187.105
AT1G11030	0	NA	NA	NA	NA	NA	0	0	0	0	0	0
AT1G11040	0	NA	NA	NA	NA	NA	0	0	0	0	0	0
AT1G11050	531.163	-0.642985	0.294753	-2.18143	0.0291514	0.284504	744.941	633.126	564.833	459.715	335.835	448.526
AT1G11055	0	NA	NA	NA	NA	NA	0	0	0	0	0	0
AT1G11060	228.015	0.444916	0.441835	1.00697	0.313947	0.786009	280.394	171.908	126.799	323.291	254.115	211.585
AT1G11070	23.0713	-1.27229	1.63443	-0.778435	0.436312	0.864756	0.925392	82.1806	14.671	14.9035	25.7473	0
AT1G11080	21.1175	0.148744	2.15322	0.0690797	0.944926	0.99299	60.1505	0	0	0	4.4778	62.0767
AT1G11090	219.672	0.239181	0.413722	0.578121	0.563182	0.913647	224.87	208.806	170.812	290.045	161.201	262.296
AT1G11100	14.2078	1.17348	1.83801	0.638453	0.523179	0.898194	12.9555	5.87004	7.33549	0	58.2113	0.87432
AT1G11110	0.308464	-1.69267	4.03906	-0.419074	0.675162	NA	1.85078	0	0	0	0	0
AT1G11112	2.23621	-4.55139	3.92529	-1.1595	0.24625	NA	0	13.4172	0	0	0	0
AT1G11120	8.35875	-5.45554	2.55831	-2.13248	0.0329674	0.303038	33.3141	0	15.7189	0	1.11945	0
AT1G11125	2.27051	-4.56679	3.92509	-1.16349	0.244632	NA	0	0	13.6231	0	0	0
AT1G11130	73.1748	-0.210315	0.69575	-0.302285	0.762435	0.964303	85.1361	82.1806	68.1153	110.056	27.9862	65.574
AT1G11145	0	NA	NA	NA	NA	NA	0	0	0	0	0	0
AT1G11150.1	150.28	0.541333	0.69074	0.7837	0.433216	0.862348	132.331	128.302	106.889	34.3926	142.17	357.597
AT1G11160	1.74079	-4.1861	3.9306	-1.065	0.286875	NA	1.85078	3.35431	5.23964	0	0	0
AT1G11170	24.7837	-0.334015	1.40116	-0.238384	0.811583	0.975019	46.2696	0	36.6775	16.0499	31.3446	18.3607
AT1G11175	940.143	0.320597	0.250172	1.28151	0.200016	0.672908	843.958	731.24	933.703	877.012	1118.33	1136.62
AT1G11180	628.702	-0.00698361	0.29932	-0.0233316	0.981386	0.996915	606.132	487.213	797.473	725.685	602.264	553.445
AT1G11185	0	NA	NA	NA	NA	NA	0	0	0	0	0	0
AT1G11190	5.45005	-3.13653	3.29862	-0.950861	0.341675	0.809288	0	0	29.342	0	3.35835	0
AT1G11200	601.395	-0.366137	0.269878	-1.35668	0.174884	0.637731	660.73	611.323	759.747	536.525	573.158	466.887
AT1G11210	3032.86	-0.0384191	0.254549	-0.15093	0.880031	0.983705	2588.32	3329.99	3300.97	2490.03	4062.48	2425.36
AT1G11220	5.70293	-4.89889	2.47682	-1.9779	0.0479403	0.364805	4.62696	10.9015	17.8148	0	0	0.87432
AT1G11230	0	NA	NA	NA	NA	NA	0	0	0	0	0	0
AT1G11240	317.55	0.536569	0.325272	1.6496	0.0990244	0.507141	243.378	283.439	250.455	410.419	378.374	339.236
AT1G11250	0	NA	NA	NA	NA	NA	0	0	0	0	0	0
AT1G11260	8120.35	0.106461	0.244925	0.434669	0.663802	0.944278	5907.7	8422.67	9131.64	9740	9347.4	6172.7
AT1G11265.1	5.81925	-0.227698	1.90036	-0.119818	0.904627	0.987744	1.85078	11.7401	5.23964	5.73211	3.35835	6.99456
AT1G11270	269.604	-0.29168	0.378182	-0.771269	0.440547	0.867443	270.215	256.605	363.631	192.599	301.132	233.443
AT1G11280	200.912	0.0352444	0.487887	0.0722389	0.942412	0.992792	223.945	202.097	169.764	128.399	145.528	335.739
AT1G11290	33.9987	-1.68578	1.17618	-1.43326	0.151783	0.607015	69.4044	24.3187	61.8277	1.14642	40.3002	6.99456
AT1G11300	146.633	-0.512635	0.503585	-1.01797	0.308691	0.78035	239.677	159.33	118.416	90.5673	115.303	156.503
AT1G11310	3502.67	-0.82315	0.235362	-3.49738	0.000469849	0.0191084	5792.96	3940.48	3693.94	2204.57	2591.52	2792.58
AT1G11320	15.7549	-3.72494	1.94301	-1.91709	0.055226	0.390557	71.2552	0.838577	15.7189	0	6.71669	0
AT1G11330	882.847	-0.286866	0.248831	-1.15285	0.248971	0.727647	1016.08	1018.03	877.115	810.52	673.908	901.424
AT1G11340	41.4289	-0.946852	1.227	-0.771679	0.440304	0.867438	13.8809	62.0547	88.0259	3.43926	3.35835	77.8145
AT1G11350	524.594	-0.00419395	0.311152	-0.0134788	0.989246	0.997714	558.937	478.828	538.635	593.846	370.538	606.778
AT1G11360	447.148	0.163593	0.338925	0.482683	0.629321	0.933935	339.619	362.265	563.785	573.211	408.599	435.411
AT1G11362	11.2689	0.955911	2.05402	0.465386	0.641655	0.936465	0	0	23.0544	16.0499	22.389	6.12024
AT1G11370	0	NA	NA	NA	NA	NA	0	0	0	0	0	0
AT1G11380	868.678	2.23872	0.484576	4.61996	3.84e-06	0.000489864	107.345	363.943	440.13	654.607	2300.47	1345.58
AT1G11390	195.954	0.819592	0.41315	1.98376	0.0472822	0.361261	152.69	137.527	135.183	185.72	258.593	306.012
AT1G11400	291.652	0.122589	0.400225	0.3063	0.759376	0.964029	359.978	242.349	235.784	202.917	314.565	394.318
AT1G11410	439.881	-0.604312	0.380335	-1.58889	0.112085	0.535746	717.179	403.356	471.567	230.431	475.766	340.985
AT1G11420	0	NA	NA	NA	NA	NA	0	0	0	0	0	0
AT1G11430	1028.23	0.45258	0.295571	1.53121	0.125718	0.561679	796.763	888.892	919.032	1630.21	804.884	1129.62
AT1G11440	451.151	0.0704751	0.359224	0.196187	0.844464	0.978614	400.695	350.525	569.025	596.139	475.766	314.755
AT1G11450	2.79862	5.0249	3.92335	1.28077	0.200275	NA	0	0	0	0	16.7917	0
AT1G11460	7.33349	-0.0107154	2.35232	-0.00455526	0.996365	0.999607	14.8063	4.19289	3.14378	0	0	21.858
AT1G11470	0.349309	-1.84943	4.02565	-0.459412	0.645938	NA	0	0	2.09585	0	0	0
AT1G11475	650.49	0.555949	0.316742	1.75521	0.0792231	0.463809	707	392.454	480.999	695.878	688.461	938.146
AT1G11480	784.566	0.177392	0.318546	0.556879	0.57761	0.921176	797.688	593.713	817.383	969.873	1004.15	524.592
AT1G11482	16.5007	-0.482749	1.43216	-0.337078	0.736058	0.959127	48.1204	3.35431	6.28756	4.58569	15.6723	20.9837
AT1G11490	0	NA	NA	NA	NA	NA	0	0	0	0	0	0
AT1G11500	0	NA	NA	NA	NA	NA	0	0	0	0	0	0
AT1G11510	0	NA	NA	NA	NA	NA	0	0	0	0	0	0
AT1G11520	0	NA	NA	NA	NA	NA	0	0	0	0	0	0
AT1G11530	1082.11	-0.271692	0.308586	-0.880443	0.37862	0.830091	1088.26	1404.62	1057.36	1414.68	831.751	695.959
AT1G11540	17.5736	1.8028	1.46809	1.22799	0.21945	0.696548	0	15.0944	8.38342	18.3427	19.0306	44.5903
AT1G11545	152.229	1.67515	0.687428	2.43684	0.0148162	0.192417	97.1662	109.854	10.4793	179.988	259.712	256.176
AT1G11550	0	NA	NA	NA	NA	NA	0	0	0	0	0	0
AT1G11560	0	NA	NA	NA	NA	NA	0	0	0	0	0	0
AT1G11570	0	NA	NA	NA	NA	NA	0	0	0	0	0	0
AT1G11572	3.66277	-5.26222	3.6549	-1.43977	0.149932	NA	1.85078	20.1259	0	0	0	0
AT1G11580	40.6431	4.22544	1.48734	2.84094	0.00449803	0.088573	0	0	12.5751	10.3178	26.8668	194.099
AT1G11590	2.73065	-3.79252	3.73039	-1.01666	0.309317	NA	0	0.838577	14.671	0	0	0.87432
AT1G11592	181.861	0.346333	0.430606	0.804293	0.421228	0.857473	186.004	147.59	146.71	263.677	160.081	187.105
AT1G11593	0	NA	NA	NA	NA	NA	0	0	0	0	0	0
AT1G11595	0	NA	NA	NA	NA	NA	0	0	0	0	0	0
AT1G11600	0	NA	NA	NA	NA	NA	0	0	0	0	0	0
AT1G11608	0.14572	1.11658	4.08047	0.27364	0.784361	NA	0	0	0	0	0	0.87432
AT1G11610	0	NA	NA	NA	NA	NA	0	0	0	0	0	0
AT1G11620	0	NA	NA	NA	NA	NA	0	0	0	0	0	0
AT1G11630	91.6891	0.134639	0.688723	0.195491	0.845009	0.97877	40.7173	73.7948	147.758	153.62	66.0475	68.197
AT1G11640	0	NA	NA	NA	NA	NA	0	0	0	0	0	0
AT1G11650	1998.41	0.237863	0.264818	0.898214	0.369071	0.824737	1860.04	1631.87	2009.92	2987.57	1734.03	1767
AT1G11655	0.174655	-0.806974	4.08047	-0.197765	0.843229	NA	0	0	1.04793	0	0	0
AT1G11660	279.527	-0.0729276	0.3865	-0.188687	0.850338	0.979725	271.14	330.4	257.79	256.798	366.06	194.973
AT1G11670	3730.59	-0.359581	0.190714	-1.88544	0.0593699	0.405482	4778.73	3942.99	3857.42	3248.96	3365.06	3190.39
AT1G11680	943.022	-0.216597	0.264696	-0.818287	0.413193	0.852632	893.003	1005.45	1143.29	864.402	694.058	1057.93
AT1G11684	0	NA	NA	NA	NA	NA	0	0	0	0	0	0
AT1G11690	0	NA	NA	NA	NA	NA	0	0	0	0	0	0
AT1G11700	78.8205	-0.0846761	0.623488	-0.13581	0.891971	0.985434	52.7474	122.432	68.1153	76.8102	75.0031	77.8145
AT1G11710	45.9283	-0.259426	0.862331	-0.300843	0.763534	0.964303	56.4489	56.1847	37.7254	20.6356	22.389	82.1861
AT1G11720	1745.96	-0.140806	0.280419	-0.502128	0.615577	0.9313	2066.4	1634.39	1791.96	1454.81	2337.41	1190.82
AT1G11730	5.30448	5.95206	3.16999	1.87763	0.0604319	0.408048	0	0	0	0	5.59725	26.2296
AT1G11735	1.69655	-4.15032	3.9312	-1.05574	0.291088	NA	10.1793	0	0	0	0	0
AT1G11740	11.3858	0.857223	1.7022	0.503596	0.614545	0.930995	8.32853	15.933	0	12.6106	7.83614	23.6066
AT1G11750	1563.32	0.158107	0.278205	0.568312	0.569823	0.917499	1381.61	1455.77	1595.99	2136.93	1067.95	1741.65
AT1G11755	127.865	0.9906	0.47991	2.06414	0.0390047	0.327266	79.5837	91.4049	85.9301	130.692	180.231	199.345
AT1G11760	262.745	-0.132674	0.443034	-0.299467	0.764583	0.964303	179.526	301.049	343.72	201.77	369.418	180.984
AT1G11765	0	NA	NA	NA	NA	NA	0	0	0	0	0	0
AT1G11770	1.46026	2.96156	3.94226	0.751235	0.452511	NA	0.925392	0	0	0	7.83614	0
AT1G11780	429.255	-0.139309	0.361412	-0.385458	0.699898	0.952625	400.695	488.891	460.04	301.509	600.025	324.373
AT1G11785	31.7874	0.196756	0.922474	0.213292	0.831099	0.977513	21.284	31.0274	36.6775	17.1963	34.7029	49.8362
AT1G11790	339.463	0.522038	0.384075	1.35921	0.174081	0.636365	292.424	300.211	243.119	588.114	295.535	317.378
AT1G11800	102.306	-1.11805	0.63206	-1.76889	0.0769119	0.458054	174.899	143.397	101.649	45.8569	113.064	34.9728
AT1G11803	0	NA	NA	NA	NA	NA	0	0	0	0	0	0
AT1G11806	0	NA	NA	NA	NA	NA	0	0	0	0	0	0
AT1G11810	0.559725	2.69612	3.98931	0.675836	0.499145	NA	0	0	0	0	3.35835	0
AT1G11820	362.939	0.0901626	0.44044	0.20471	0.837798	0.977513	238.751	361.427	454.801	191.452	555.247	375.958
AT1G11840	1528.72	0.261601	0.205796	1.27116	0.20367	0.674861	1319.61	1344.24	1507.97	1676.07	1614.25	1710.17
AT1G11850	0.523964	-2.44069	3.9861	-0.612301	0.540339	NA	0	0	3.14378	0	0	0
AT1G11860	7661.59	0.380686	0.212661	1.79011	0.0734363	0.447729	5487.58	7811.35	6671.11	8394.1	7507.03	10098.4
AT1G11870	265.616	0.0328148	0.360742	0.0909646	0.927521	0.991444	235.05	326.207	226.352	256.798	276.504	272.788
AT1G11880	140.753	0.239819	0.541974	0.442492	0.658133	0.942438	141.585	157.653	88.0259	77.9567	186.948	192.35
AT1G11890	984.714	0.0137379	0.244486	0.056191	0.95519	0.994442	983.692	1102.73	853.013	1120.05	960.487	888.309
AT1G11900	67.9878	-0.640003	0.834442	-0.766983	0.443091	0.868008	37.9411	127.464	82.7863	94.0066	52.6141	13.1148
AT1G11905	142.974	-0.0763845	0.62639	-0.121944	0.902943	0.987341	53.6727	234.802	151.949	126.106	80.6003	210.711
AT1G11910	3062.86	-0.228111	0.229395	-0.994403	0.320027	0.792725	3146.33	3206.72	3560.86	3291.38	2085.53	3086.35
AT1G11915	0	NA	NA	NA	NA	NA	0	0	0	0	0	0
AT1G11920	0	NA	NA	NA	NA	NA	0	0	0	0	0	0
AT1G11925	0	NA	NA	NA	NA	NA	0	0	0	0	0	0
AT1G11930	2024.56	0.12512	0.216244	0.578603	0.562857	0.913502	2303.3	1814.68	1692.4	2180.49	1988.14	2168.31
AT1G11940	88.3912	0.28982	0.684915	0.423147	0.672188	0.946966	75.8822	129.98	32.4858	142.156	69.4058	80.4375
AT1G11950	78.7959	-1.39577	0.890558	-1.5673	0.117045	0.546394	55.5235	202.936	83.8342	25.2213	97.3921	7.86888
AT1G11960	2682.97	0.874621	0.204861	4.26935	1.96e-05	0.00165997	1687.92	2181.98	1810.82	3295.96	3780.38	3340.78
AT1G11970	0.139763	-0.806974	4.08047	-0.197765	0.843229	NA	0	0.838577	0	0	0	0
AT1G11980	0.308464	-1.69267	4.03906	-0.419074	0.675162	NA	1.85078	0	0	0	0	0
AT1G11990	11.7546	-6.94386	2.64683	-2.62347	NA	NA	0.925392	69.6019	0	0	0	0
AT1G12000	539.316	-0.153817	0.305792	-0.503013	0.614955	0.931069	582.072	672.539	449.561	416.151	522.783	592.789
AT1G12010	25.514	2.55898	1.23816	2.06675	0.0387574	0.326428	12.0301	10.0629	0	41.2712	50.3752	39.3444
AT1G12013	5.05033	-2.5386	3.03337	-0.836891	0.402654	0.845493	24.9856	0.838577	0	0	4.4778	0
AT1G12015	0.308464	-1.69267	4.03906	-0.419074	0.675162	NA	1.85078	0	0	0	0	0
AT1G12020	140.658	-0.917398	0.774213	-1.18494	0.23604	0.715033	109.196	363.943	78.5946	154.767	16.7917	120.656
AT1G12030	36.4188	-0.838559	1.05797	-0.792608	0.428006	0.860167	89.763	25.1573	25.1503	52.7354	5.59725	20.1094
AT1G12040	0.43716	2.37332	4.00972	0.591892	0.553923	NA	0	0	0	0	0	2.62296
AT1G12050	502.487	0.250077	0.327261	0.76415	0.444778	0.869029	492.309	342.978	541.778	619.068	607.861	410.93
AT1G12060	205.483	0.0254856	0.56399	0.0451879	0.963958	0.995442	144.361	278.408	188.627	89.4209	150.006	382.078
AT1G12064	0	NA	NA	NA	NA	NA	0	0	0	0	0	0
AT1G12070	0	NA	NA	NA	NA	NA	0	0	0	0	0	0
AT1G12080	26.8246	-2.26018	1.54609	-1.46187	0.143777	0.593492	85.1361	46.1218	2.09585	0	2.2389	25.3553
AT1G12090	6887.98	0.21913	0.24979	0.877257	0.380347	0.830457	5881.79	6178.64	7037.88	4794.33	8894.02	8541.23
AT1G12100	1.39724	-3.86427	3.93654	-0.981641	0.326277	NA	0	0	8.38342	0	0	0
AT1G12110	235.5	-0.395079	0.446386	-0.885059	0.376125	0.829508	350.724	152.621	299.707	191.452	162.32	256.176
AT1G12120	895.713	0.223811	0.296126	0.755795	0.449772	0.870995	721.806	887.215	870.828	723.392	842.945	1328.09
AT1G12130	7.70877	-6.33326	2.4171	-2.62019	0.00878808	0.137782	3.70157	18.4487	24.1023	0	0	0
AT1G12140	429.28	0.508601	0.375114	1.35586	0.175144	0.637731	367.381	247.38	448.513	705.049	392.927	414.428
AT1G12150	134.36	0.371917	0.490222	0.75867	0.44805	0.869992	148.063	104.822	98.5052	184.574	111.945	158.252
AT1G12160	0.7286	3.10102	3.96929	0.781255	0.434653	NA	0	0	0	0	0	4.3716
AT1G12170	0	NA	NA	NA	NA	NA	0	0	0	0	0	0
AT1G12180	0	NA	NA	NA	NA	NA	0	0	0	0	0	0
AT1G12190	0	NA	NA	NA	NA	NA	0	0	0	0	0	0
AT1G12200	8.71116	0.114383	2.5367	0.0450912	0.964035	0.995442	15.7317	0	9.43135	0	0	27.1039
AT1G12210	31.448	0.635337	1.14041	0.557114	0.57745	0.921176	30.5379	6.70862	36.6775	11.4642	88.4365	14.8634
AT1G12211	5.85939	1.30152	1.92353	0.676628	0.498642	0.889347	5.55235	2.51573	2.09585	2.29284	7.83614	14.8634
AT1G12220	206.936	-1.44411	0.517773	-2.78908	0.00528582	0.0975946	357.201	360.588	190.723	67.6389	78.3614	187.105
AT1G12230	1145.34	-0.0670541	0.254416	-0.263561	0.792118	0.970158	927.243	1293.09	1295.24	1311.51	1037.73	1007.22
AT1G12240	5680.44	-0.794922	0.222936	-3.56569	0.000362894	0.0156305	7101.46	7828.12	6689.97	5093.55	4243.83	3125.69
AT1G12244	397.474	-0.289564	0.3208	-0.902631	0.366722	0.823659	386.814	527.465	397.165	412.712	310.087	350.602
AT1G12250	1593.08	0.0185525	0.213075	0.08707	0.930616	0.99178	1711.98	1413.84	1623.24	1552.25	1506.78	1750.39
AT1G12260	0	NA	NA	NA	NA	NA	0	0	0	0	0	0
AT1G12270	665.974	-0.101739	0.33868	-0.300398	0.763874	0.964303	559.862	768.137	739.837	577.796	923.545	426.668
AT1G12280	158.018	-0.00730926	0.558178	-0.0130949	0.989552	0.99779	126.779	210.483	138.326	88.2745	109.706	274.537
AT1G12290	172.055	0.106784	0.572076	0.186661	0.851926	0.979725	242.453	127.464	126.799	263.677	203.74	68.197
AT1G12294	0	NA	NA	NA	NA	NA	0	0	0	0	0	0
AT1G12300	62.7854	-0.448255	1.24926	-0.358817	0.719732	0.957581	63.8521	145.074	8.38342	0	113.064	46.339
AT1G12310	813.452	0.231497	0.327724	0.706379	0.479953	0.885179	467.323	1003.78	773.37	1016.88	926.904	692.462
AT1G12320	16.1792	-1.74158	2.15076	-0.809751	0.418083	0.855315	45.3442	0	29.342	0	22.389	0
AT1G12330	129.11	-0.160783	0.508006	-0.316498	0.751625	0.961893	128.63	187.841	92.2176	107.764	141.051	117.159
AT1G12340	10.9317	2.24486	2.1473	1.04543	0.295823	0.771336	0	0	11.5272	1.14642	10.075	42.8417
AT1G12350	1069.98	0.146347	0.241773	0.605306	0.544976	0.90683	1128.98	1039.84	878.163	1004.27	1286.25	1082.41
AT1G12360	1611.64	0.00352247	0.257546	0.0136771	0.989088	0.997714	1436.21	1963.95	1428.33	2009.68	1288.49	1543.18
AT1G12370	85.5166	0.697896	0.72445	0.963347	0.335373	0.80538	25.911	74.6334	95.3614	97.4458	49.2558	170.492
AT1G12380	20.0762	0.641533	1.62199	0.395523	0.692457	0.951208	20.3586	1.67715	25.1503	0	11.1945	62.0767
AT1G12390	459.755	0.371859	0.365741	1.01673	0.309282	0.781019	497.861	366.458	338.481	535.379	323.521	696.833
AT1G12400	400.965	-0.540481	0.293687	-1.84033	0.0657193	0.4244	462.696	453.67	509.293	339.341	319.043	321.75
AT1G12410	1431.27	0.155965	0.291474	0.535088	0.592589	0.924297	1199.31	1132.08	1731.18	1807.91	1013.1	1704.05
AT1G12411	1.40916	-2.70908	3.94079	-0.687445	0.491802	NA	0	0	7.33549	0	1.11945	0
AT1G12420	93.1846	-0.38827	0.707587	-0.548723	0.583195	0.921557	53.6727	82.1806	181.291	33.2462	118.662	90.055
AT1G12423	0	NA	NA	NA	NA	NA	0	0	0	0	0	0
AT1G12430	106.62	-0.0729726	0.555079	-0.131463	0.895409	0.986442	142.51	84.6963	100.601	96.2994	142.17	73.4429
AT1G12440	1754.17	0.0748262	0.225428	0.33193	0.739942	0.959603	1674.03	1603.36	1849.59	1548.82	1687.01	2162.19
AT1G12450	286.38	1.4198	0.398157	3.56594	0.000362555	0.0156305	118.45	132.495	216.921	335.902	514.947	399.564
AT1G12451	1.83035	4.41884	3.93197	1.12382	0.261089	NA	0	0	0	0	2.2389	8.7432
AT1G12460	45.6504	0.29037	0.919607	0.315755	0.752189	0.961893	37.0157	36.8974	49.2526	104.324	12.3139	34.0985
AT1G12470	246.473	0.581522	0.417586	1.39258	0.163747	0.621943	248.005	135.011	209.585	215.527	363.821	306.886
AT1G12480	15.4739	0.758328	2.01489	0.376362	0.706648	0.955601	0.925392	33.5431	0	0	19.0306	39.3444
AT1G12490	2.61205	4.92524	3.92453	1.25499	0.209483	NA	0	0	0	0	15.6723	0
AT1G12500	1128.97	0.0487169	0.293234	0.166136	0.86805	0.982211	1121.58	1189.1	1018.59	878.159	1642.23	924.156
AT1G12510	1.22258	-3.67086	3.94079	-0.931503	0.351593	NA	0	0	7.33549	0	0	0
AT1G12520	2709.88	0.290054	0.185815	1.56099	0.118527	0.548805	2462.47	2317.83	2534.94	2923.37	3118.78	2901.87
AT1G12530	365.597	0.357946	0.376249	0.951353	0.341425	0.809205	422.904	206.29	332.193	478.058	425.391	328.744
AT1G12540	0.186575	1.11658	4.08047	0.27364	0.784361	NA	0	0	0	0	1.11945	0
AT1G12550	418.336	0.385727	0.369619	1.04358	0.296679	0.771891	473.801	272.538	341.624	491.815	606.741	323.498
AT1G12560	1.07962	-3.49852	3.94508	-0.886804	0.375185	NA	6.47775	0	0	0	0	0
AT1G12570	0.419289	-2.14839	4.00369	-0.536602	0.591543	NA	0	2.51573	0	0	0	0
AT1G12580	2300.08	-0.399113	0.237293	-1.68195	0.0925793	0.494618	2538.35	2737.96	2572.66	1445.64	2362.04	2143.83
AT1G12590	5.12038	-0.248399	2.26793	-0.109527	0.912785	0.989493	8.32853	0	8.38342	2.29284	5.59725	6.12024
AT1G12600	45.1032	0.201047	1.00169	0.200708	0.840927	0.97754	62.9267	28.5116	34.5816	4.58569	60.4502	79.5631
AT1G12610	4444.79	-0.0779218	0.252824	-0.308206	0.757925	0.963953	3538.7	6154.32	4000.99	3573.4	5014.01	4387.34
AT1G12620	122.177	-0.37543	0.548553	-0.684401	0.493722	0.888532	122.152	129.141	162.429	165.085	89.5559	64.6997
AT1G12630	1.58381	-2.90249	3.93654	-0.73732	0.460928	NA	0	0	8.38342	0	1.11945	0
AT1G12640	457.459	-0.139395	0.343158	-0.406212	0.684587	0.94917	449.741	613	375.158	497.547	493.677	315.63
AT1G12650	336.633	0.0228971	0.346135	0.0661507	0.947258	0.993181	419.203	269.183	313.33	366.855	362.701	288.526
AT1G12660	1.71697	-4.16707	3.93092	-1.06008	0.28911	NA	9.25392	0	1.04793	0	0	0
AT1G12663	0	NA	NA	NA	NA	NA	0	0	0	0	0	0
AT1G12665	0	NA	NA	NA	NA	NA	0	0	0	0	0	0
AT1G12667	0	NA	NA	NA	NA	NA	0	0	0	0	0	0
AT1G12669	0	NA	NA	NA	NA	NA	0	0	0	0	0	0
AT1G12670	0	NA	NA	NA	NA	NA	0	0	0	0	0	0
AT1G12672	0.85285	-3.15049	3.95547	-0.796488	0.425748	NA	0.925392	0	4.19171	0	0	0
AT1G12680	354.754	-0.490803	0.38185	-1.28533	0.198678	0.670976	333.141	375.683	534.443	315.266	375.015	194.973
AT1G12700	50.312	0.0633607	1.23949	0.0511183	0.959231	0.994442	38.8665	85.5349	23.0544	44.7104	109.706	0
AT1G12710	316.459	1.97858	0.536364	3.68888	0.000225247	0.0111949	102.719	101.468	180.244	276.288	986.235	251.804
AT1G12720.1	0	NA	NA	NA	NA	NA	0	0	0	0	0	0
AT1G12725.1	0	NA	NA	NA	NA	NA	0	0	0	0	0	0
AT1G12730	249.636	0.492901	0.477404	1.03246	0.301857	0.774428	210.064	171.908	239.975	429.908	315.685	130.274
AT1G12740	3.6741	-4.24338	3.28229	-1.29281	0.196077	NA	0	7.5472	13.6231	0	0	0.87432
AT1G12750	910.997	-0.214587	0.2896	-0.740977	0.458707	0.87514	898.556	801.68	1236.55	807.081	669.431	1052.68
AT1G12760	1268.88	-0.361972	0.245987	-1.47151	0.141153	0.589523	1229.85	1440.68	1610.66	1222.09	1219.08	890.932
AT1G12770	337.456	0.187672	0.376618	0.498309	0.618266	0.932494	331.29	307.758	308.091	291.191	265.309	521.095
AT1G12775	95.3184	0.0980869	0.715616	0.137066	0.890978	0.985434	111.047	58.7004	106.889	34.3926	69.4058	191.476
AT1G12780	1336.12	-0.0302495	0.241076	-0.125477	0.900146	0.987108	1205.79	1389.52	1455.57	1044.39	1442.97	1478.48
AT1G12790	139.542	0.37869	0.562938	0.672703	0.501136	0.890014	49.9712	143.397	170.812	137.571	146.648	188.853
AT1G12800	836.341	-0.100505	0.268696	-0.374048	0.708369	0.956092	836.555	839.416	921.128	625.946	802.645	992.353
AT1G12805	0	NA	NA	NA	NA	NA	0	0	0	0	0	0
AT1G12810	321.82	0.0829778	0.328564	0.252546	0.800619	0.972316	337.768	292.664	307.043	368.001	344.79	280.657
AT1G12820	795.683	-0.10917	0.357693	-0.305205	0.76021	0.964269	719.955	975.266	782.802	444.812	668.311	1182.96
AT1G12830	413.972	0.199611	0.368098	0.542276	0.587628	0.922335	365.53	305.242	485.19	539.965	503.752	284.154
AT1G12840	2189.11	0.260717	0.222532	1.17159	0.241361	0.720305	1936.85	2411.75	1626.38	2274.5	2457.19	2427.99
AT1G12845	63.5187	0.800129	0.85432	0.936568	0.348981	0.812935	39.7919	12.5787	86.978	69.9317	38.0613	133.771
AT1G12850	454.785	0.118431	0.382063	0.309978	0.756577	0.963383	317.41	515.725	475.759	296.923	444.421	678.472
AT1G12855	0.37315	2.10723	4.03022	0.522856	0.601075	NA	0	0	0	0	2.2389	0
AT1G12860	382.425	0.0644824	0.329934	0.19544	0.845048	0.97877	355.351	445.285	320.666	341.634	475.766	355.848
AT1G12870	5.47641	4.99487	2.87556	1.73701	0.0823856	0.471884	0.925392	0	0	0	10.075	21.858
AT1G12880	173.956	1.07359	0.676542	1.58688	0.112539	0.536718	158.242	88.0506	90.1218	190.306	49.2558	467.761
AT1G12890	2.82873	2.84691	3.66562	0.776651	0.437365	NA	0	0	2.09585	13.7571	1.11945	0
AT1G12900	7535.94	0.449156	0.229352	1.95837	0.0501864	0.371943	5467.22	7229.38	6420.65	8623.38	6608.11	10866.9
AT1G12910	929.224	0.0370485	0.289177	0.128117	0.898056	0.986967	724.582	1158.08	868.732	821.984	1188.85	813.118
AT1G12920	958.149	-0.126721	0.318444	-0.397939	0.690675	0.950515	956.856	1059.96	982.956	1060.44	1167.59	521.095
AT1G12930	372.538	0.214793	0.379297	0.566292	0.571195	0.917949	333.141	281.762	420.219	246.481	450.019	503.608
AT1G12935.1	0	NA	NA	NA	NA	NA	0	0	0	0	0	0
AT1G12938	1.21683	-1.63226	3.9293	-0.415408	0.677843	NA	5.55235	0	0	0	0	1.74864
AT1G12940	0	NA	NA	NA	NA	NA	0	0	0	0	0	0
AT1G12950	0	NA	NA	NA	NA	NA	0	0	0	0	0	0
AT1G12960	0	NA	NA	NA	NA	NA	0	0	0	0	0	0
AT1G12970	491.788	-0.372526	0.366284	-1.01704	0.309134	0.780963	321.111	656.606	687.44	346.219	428.749	510.603
AT1G12980	0	NA	NA	NA	NA	NA	0	0	0	0	0	0
AT1G12990	808.096	0.235977	0.243116	0.970637	0.331729	0.801207	755.12	729.562	741.933	763.517	952.651	905.796
AT1G13000	463.973	0.0735291	0.280943	0.261722	0.793535	0.970627	471.025	462.895	422.315	473.472	508.23	445.903
AT1G13010	0.37315	2.10723	4.03022	0.522856	0.601075	NA	0	0	0	0	2.2389	0
AT1G13020	156.071	0.506822	0.528765	0.958501	0.33781	0.806559	79.5837	181.133	125.751	226.991	217.173	105.793
AT1G13030	84.0008	0.172372	0.739639	0.233049	0.815723	0.976222	89.763	98.1136	49.2526	74.5174	27.9862	164.372
AT1G13040	15.1353	-0.421677	1.64889	-0.255735	0.798156	0.97197	19.4332	3.35431	29.342	0	8.95559	29.7269
AT1G13050	80.6862	-0.745408	0.797389	-0.93481	0.349886	0.813517	133.256	109.015	60.7798	19.4892	130.976	30.6012
AT1G13060	634.953	0.536861	0.328742	1.63308	0.102453	0.514882	415.501	655.768	483.095	904.527	507.11	843.719
AT1G13070	2.62296	4.93786	3.92437	1.25826	0.2083	NA	0	0	0	0	0	15.7378
AT1G13080	382.717	-0.54529	0.35071	-1.55482	0.11999	0.551009	625.565	376.521	360.487	282.02	336.954	314.755
AT1G13090	908.505	-0.262182	0.254963	-1.02831	0.303802	0.775928	1170.62	876.313	925.32	785.299	945.934	747.544
AT1G13100	515.418	-0.56167	0.302642	-1.85589	0.0634692	0.418709	694.044	464.572	685.345	404.687	383.971	459.892
AT1G13110	3482.73	-0.277738	0.301333	-0.9217	0.356685	0.817123	4579.77	2952.63	3919.25	1773.51	3609.1	4062.09
AT1G13120	484.539	0.0346686	0.395141	0.0877374	0.930085	0.991769	583.922	279.246	573.216	332.462	682.864	455.521
AT1G13130	0	NA	NA	NA	NA	NA	0	0	0	0	0	0
AT1G13140	21.1437	-1.09712	2.127	-0.515808	0.605989	0.92897	0	86.3735	0	8.02495	32.464	0
AT1G13145	84.9798	-1.70396	0.611752	-2.78537	0.00534662	0.0983885	99.017	194.55	96.4093	41.2712	43.6585	34.9728
AT1G13150	138.573	-0.359158	0.681507	-0.527005	0.59819	0.926156	105.495	184.487	177.1	35.5391	251.876	76.9402
AT1G13160	156.196	0.0532546	0.523951	0.10164	0.919042	0.990109	185.078	178.617	96.4093	98.5923	143.289	235.192
AT1G13170	62.932	0.492477	0.76165	0.646593	0.517896	0.895975	90.6884	24.3187	41.9171	97.4458	43.6585	79.5631
AT1G13180	202.434	0.488825	0.405926	1.20422	0.228503	0.705641	211.915	134.172	159.285	262.531	227.248	219.454
AT1G13190	572.697	0.252478	0.295231	0.855186	0.392448	0.837341	534.877	471.281	561.689	764.663	620.175	483.499
AT1G13195	400.67	0.9954	0.342286	2.9081	0.00363636	0.0770535	318.335	276.731	207.49	585.821	613.458	402.187
AT1G13200	1.60257	1.21227	3.85681	0.314318	0.75328	NA	1.85078	0	1.04793	0	6.71669	0
AT1G13210	1627.62	-0.403948	0.225682	-1.7899	0.0734705	0.447758	2131.18	1527.05	1904.08	1297.75	1486.63	1419.02
AT1G13220	1172.92	0.25923	0.272583	0.951015	0.341597	0.809288	1058.65	1165.62	978.764	1015.73	1720.59	1098.15
AT1G13230	4.92415	-5.6867	3.25281	-1.74824	0.080422	0.46685	22.2094	0	7.33549	0	0	0
AT1G13240	0.154232	-0.806974	4.08047	-0.197765	0.843229	NA	0.925392	0	0	0	0	0
AT1G13245	3012.91	-0.373382	0.240108	-1.55506	0.119933	0.550993	3670.11	3426.43	3106.06	2707.85	1899.7	3267.33
AT1G13250	238.586	0.0135088	0.364893	0.0370212	0.970468	0.996461	221.169	244.865	246.263	279.727	218.293	221.203
AT1G13260	3749.82	-1.06927	0.299423	-3.57109	0.000355499	0.0154623	4912.91	6078.85	4246.2	1321.82	2926.24	3012.91
AT1G13270	232.038	0.391808	0.515191	0.76051	0.44695	0.869204	185.078	207.129	209.585	337.048	361.582	91.8036
AT1G13280	245.568	-0.322574	0.405383	-0.795727	0.426191	0.859264	248.005	362.265	208.538	193.745	188.067	272.788
AT1G13290	0	NA	NA	NA	NA	NA	0	0	0	0	0	0
AT1G13300	102.502	-1.4439	0.777326	-1.85752	0.0632379	0.418078	130.48	77.9877	241.023	121.521	21.2695	22.7323
AT1G13310	8.88268	-0.310983	2.31145	-0.13454	0.892975	0.98578	0.925392	28.5116	0	14.9035	8.95559	0
AT1G13320	645.387	-0.169691	0.26465	-0.64119	0.521399	0.897377	600.58	665.83	783.85	561.747	616.816	643.5
AT1G13330	12.4065	-1.21029	1.77098	-0.683399	0.494355	0.888581	5.55235	36.0588	10.4793	0	2.2389	20.1094
AT1G13340	181.446	-0.759811	0.552986	-1.37401	0.169438	0.629601	124.003	360.588	200.154	113.496	80.6003	209.837
AT1G13350	2280.83	0.198789	0.219104	0.907284	0.364257	0.822374	2289.42	2012.59	2069.66	2089.93	2947.51	2275.86
AT1G13360	1712.06	-1.22384	0.324691	-3.76925	0.000163736	0.00878644	2388.44	2673.38	2130.44	1600.4	604.502	875.194
AT1G13370	5.78586	0.979252	2.58228	0.37922	0.704525	0.955057	0	3.35431	8.38342	0	1.11945	21.858
AT1G13380	327.712	0.213004	0.366038	0.581918	0.560622	0.912705	208.213	334.592	367.823	342.78	408.599	304.263
AT1G13390	6068.12	-0.198886	0.299462	-0.664143	0.506599	0.891863	7727.95	6078.85	5649.38	8586.7	4944.61	3421.21
AT1G13400	0.77116	-3.01337	3.96029	-0.760896	0.446719	NA	4.62696	0	0	0	0	0
AT1G13410	12.6822	0.880668	1.68553	0.522489	0.60133	0.927223	4.62696	7.5472	14.671	0	21.2695	27.9782
AT1G13420	0.523964	-2.44069	3.9861	-0.612301	0.540339	NA	0	0	3.14378	0	0	0
AT1G13430	17.0236	7.6328	1.89943	4.01846	5.86e-05	0.00391671	0	0	0	38.9783	8.95559	54.2079
AT1G13440	9289.74	-0.124281	0.286634	-0.433586	0.664589	0.944526	9820.26	10042	9207.09	10713.3	4705.04	11250.8
AT1G13448	45.9516	0.792921	0.872867	0.90841	0.363662	0.821978	40.7173	26.8345	33.5337	21.782	39.1807	113.662
AT1G13450	997.431	0.575242	0.273325	2.10461	0.0353252	0.31269	805.091	607.969	991.339	1052.41	1138.48	1389.29
AT1G13460	472.945	-0.35037	0.353037	-0.992446	0.32098	0.79333	571.892	653.252	364.679	339.341	547.411	361.094
AT1G13470	13.4891	0.365126	1.98548	0.183898	0.854094	0.980008	13.8809	5.87004	15.7189	0	0	45.4646
AT1G13480	0	NA	NA	NA	NA	NA	0	0	0	0	0	0
AT1G13485	0	NA	NA	NA	NA	NA	0	0	0	0	0	0
AT1G13490	1.07962	-3.49852	3.94508	-0.886804	0.375185	NA	6.47775	0	0	0	0	0
AT1G13500	0.174655	-0.806974	4.08047	-0.197765	0.843229	NA	0	0	1.04793	0	0	0
AT1G13510	0	NA	NA	NA	NA	NA	0	0	0	0	0	0
AT1G13520	23.5453	-2.12994	1.44095	-1.47815	0.139368	0.586108	31.4633	60.3776	23.0544	0	24.6279	1.74864
AT1G13530	16.1153	-0.399084	1.8783	-0.212471	0.83174	0.977513	0	36.0588	18.8627	14.9035	26.8668	0
AT1G13540	14.6464	0.406106	1.93589	0.209777	0.833841	0.977513	0	25.1573	12.5751	37.8319	12.3139	0
AT1G13550	18.2739	0.0148879	1.33217	0.0111757	0.991083	0.998234	14.8063	16.7715	23.0544	1.14642	22.389	31.4755
AT1G13560	4304.21	0.400571	0.259305	1.54479	0.122397	0.555277	3144.48	4197.92	3789.31	3190.49	5947.63	5555.43
AT1G13570	283.616	0.239949	0.378411	0.634096	0.526018	0.899534	228.572	223.9	328.001	374.88	235.084	311.258
AT1G13580	148.756	-0.0190544	0.551882	-0.0345263	0.972457	0.996461	188.78	120.755	139.374	166.231	212.695	64.6997
AT1G13590	0.154232	-0.806974	4.08047	-0.197765	0.843229	NA	0.925392	0	0	0	0	0
AT1G13600	0	NA	NA	NA	NA	NA	0	0	0	0	0	0
AT1G13605	1.11945	3.70032	3.94816	0.937228	0.348642	NA	0	0	0	0	6.71669	0
AT1G13607	0	NA	NA	NA	NA	NA	0	0	0	0	0	0
AT1G13608	1.67917	4.28674	3.93438	1.08956	0.275907	NA	0	0	0	0	10.075	0
AT1G13609	128.581	5.11983	0.890318	5.75057	8.89e-09	4.19e-06	9.25392	0	12.5751	392.076	303.371	54.2079
AT1G13610	5.26945	-4.76935	2.93678	-1.62401	0.104374	0.518624	23.1348	0	7.33549	1.14642	0	0
AT1G13620	2.83029	3.99934	3.6166	1.10583	0.2688	NA	0.925392	0	0	0	13.4334	2.62296
AT1G13630	8.96199	-0.0391988	1.85647	-0.0211147	0.983154	0.997041	15.7317	0	11.5272	10.3178	10.075	6.12024
AT1G13635	6.32046	0.682929	2.11555	0.322815	0.746836	0.961157	12.0301	2.51573	0	3.43926	11.1945	8.7432
AT1G13640	526.883	0.141825	0.309141	0.458772	0.646398	0.938811	391.441	549.268	562.737	456.276	536.216	665.358
AT1G13650	592.558	0.0765647	0.365717	0.209355	0.834171	0.977513	473.801	680.925	576.36	361.123	560.844	902.298
AT1G13660.1	0	NA	NA	NA	NA	NA	0	0	0	0	0	0
AT1G13670	0.154232	-0.806974	4.08047	-0.197765	0.843229	NA	0.925392	0	0	0	0	0
AT1G13680	0.308464	-1.69267	4.03906	-0.419074	0.675162	NA	1.85078	0	0	0	0	0
AT1G13690	488.843	0.733862	0.357807	2.051	0.0402669	0.332102	270.215	299.372	532.347	481.497	705.253	644.374
AT1G13700	1364.15	-0.0416311	0.300276	-0.138643	0.889732	0.985434	874.496	1723.28	1554.08	1052.41	1385.88	1594.76
AT1G13710	0.77116	-3.01337	3.96029	-0.760896	0.446719	NA	4.62696	0	0	0	0	0
AT1G13720	0	NA	NA	NA	NA	NA	0	0	0	0	0	0
AT1G13730	165.546	-0.930586	0.417777	-2.22747	0.0259158	0.267176	196.183	241.51	213.777	116.935	108.587	116.285
AT1G13740	524.395	0.732905	0.396018	1.85069	0.0642143	0.420571	289.648	250.735	642.38	534.232	630.25	799.129
AT1G13750	139.865	-1.38468	0.476606	-2.90528	0.00366919	0.0776696	220.243	218.869	167.668	94.0066	57.0919	81.3118
AT1G13755	0.897113	-0.488266	3.93464	-0.124094	0.901241	NA	0	0	3.14378	0	2.2389	0
AT1G13760	0	NA	NA	NA	NA	NA	0	0	0	0	0	0
AT1G13770	196.27	-0.277222	0.418415	-0.662553	0.507617	0.89236	246.154	214.676	184.435	129.546	210.456	192.35
AT1G13780	83.0185	-1.04004	0.712451	-1.4598	0.144344	0.594646	102.719	128.302	103.745	77.9567	70.5253	14.8634
AT1G13790	31.0914	-1.26625	1.17246	-1.07999	0.280146	0.760024	44.4188	36.8974	50.3005	13.7571	40.3002	0.87432
AT1G13800	15.4087	-0.261714	1.99401	-0.13125	0.895577	0.986442	1.85078	36.0588	12.5751	0	0	41.9674
AT1G13810	76.5981	-1.34902	0.739976	-1.82305	0.0682951	0.432374	182.302	78.8263	69.1632	17.1963	44.778	67.3227
AT1G13820	804.79	0.259856	0.277072	0.937866	0.348314	0.812935	756.971	789.101	651.811	813.959	703.014	1113.88
AT1G13830	2.39517	-4.64664	3.9241	-1.18413	0.236362	NA	10.1793	0	4.19171	0	0	0
AT1G13840	0.154232	-0.806974	4.08047	-0.197765	0.843229	NA	0.925392	0	0	0	0	0
AT1G13850	0	NA	NA	NA	NA	NA	0	0	0	0	0	0
AT1G13860	153.61	0.284095	0.481777	0.589681	0.555404	0.910852	84.2107	175.263	156.141	145.596	184.709	175.738
AT1G13870	121.312	0.144831	0.497685	0.29101	0.771044	0.964411	100.868	110.692	134.135	161.645	100.75	119.782
AT1G13880	760.633	-0.327509	0.310713	-1.05406	0.291857	0.768759	676.462	1004.62	858.253	572.064	919.068	533.335
AT1G13890	4.45535	-0.729162	3.52214	-0.207022	0.835992	0.977513	16.6571	0	0	0	10.075	0
AT1G13900	115.454	0.584188	0.611637	0.955122	0.339516	0.808297	98.0916	83.8577	95.3614	183.427	49.2558	182.733
AT1G13910	289.399	0.0450774	0.450545	0.100051	0.920304	0.990457	220.243	334.592	299.707	159.353	464.571	257.924
AT1G13920	91.1077	-2.51622	0.649971	-3.87128	0.000108267	0.00654031	185.078	119.917	160.333	41.2712	11.1945	28.8526
AT1G13930	4014.25	-0.0313569	0.204627	-0.153239	0.878209	0.983451	3817.24	4140.06	4216.86	4229.15	3216.18	4466.03
AT1G13940	97.3202	-0.646295	0.525323	-1.23028	0.218592	0.695536	110.122	113.208	133.087	69.9317	72.7642	84.8091
AT1G13950	411.165	0.568834	0.383147	1.48464	0.13764	0.582432	223.02	348.01	422.315	436.787	678.386	358.471
AT1G13960	513.918	0.317275	0.355829	0.891651	0.37258	0.827715	377.56	380.714	615.133	379.466	706.372	624.265
AT1G13970	16.4558	-7.4284	2.2722	-3.26926	0.00107829	0.0337536	0	70.4405	28.294	0	0	0
AT1G13980	128.063	-0.388559	0.589987	-0.658588	0.51016	0.893404	97.1662	129.98	208.538	169.67	53.7336	109.29
AT1G13990	871.821	0.628311	0.347121	1.81006	0.0702863	0.438308	778.255	555.138	720.974	1455.96	1149.67	570.931
AT1G14000	677.995	0.00344067	0.332521	0.0103472	0.991744	0.998484	619.087	855.349	556.449	959.555	540.694	536.833
AT1G14010	553.769	0.154078	0.276081	0.55809	0.576783	0.921157	462.696	579.457	530.251	651.167	563.083	535.958
AT1G14020	186.722	-0.248502	0.515277	-0.482269	0.629615	0.934136	93.4646	309.435	205.394	132.985	185.829	193.225
AT1G14030	1312.95	-0.628654	0.28795	-2.1832	0.0290208	0.283619	1303.88	1960.59	1519.49	695.878	1228.04	1169.84
AT1G14040	23.891	-1.39055	1.34015	-1.03761	0.299452	0.773892	50.8966	22.6416	30.3899	0	12.3139	27.1039
AT1G14048	0.174655	-0.806974	4.08047	-0.197765	0.843229	NA	0	0	1.04793	0	0	0
AT1G14060	104.396	0.348941	0.657629	0.530604	0.595693	0.925004	59.2251	57.0233	159.285	167.378	123.139	60.3281
AT1G14070	143.402	-0.304397	0.609825	-0.499154	0.617671	0.932494	272.065	139.204	63.9236	188.013	94.0337	103.17
AT1G14071	12.3794	-0.458169	1.7717	-0.258605	0.79594	0.971614	32.3887	3.35431	7.33549	0	6.71669	24.481
AT1G14080	0	NA	NA	NA	NA	NA	0	0	0	0	0	0
AT1G14090	33.3953	-0.0313079	1.29899	-0.0241018	0.980771	0.996795	37.0157	36.8974	27.2461	29.807	69.4058	0
AT1G14100	2.01998	3.47727	3.93162	0.884436	0.376461	NA	0.925392	0	0	0	11.1945	0
AT1G14110	0	NA	NA	NA	NA	NA	0	0	0	0	0	0
AT1G14120	51.1189	1.14318	1.03896	1.10031	0.271199	0.751369	79.5837	11.7401	4.19171	116.935	39.1807	55.0822
AT1G14130	269.519	-0.189535	0.403873	-0.469293	0.63886	0.935915	211.915	277.569	372.014	333.609	218.293	203.717
AT1G14140	528.585	-0.0273007	0.363854	-0.0750321	0.940189	0.992652	479.353	623.902	497.766	287.752	631.369	651.369
AT1G14150	1151.76	0.530018	0.27412	1.93352	0.0531716	0.383698	797.688	1085.96	944.183	1476.59	977.279	1628.86
AT1G14160	2.39007	4.80136	3.92612	1.22293	0.221357	NA	0	0	0	0	5.59725	8.7432
AT1G14170	34.1195	1.69162	1.06962	1.58151	0.11376	0.539181	33.3141	2.51573	12.5751	82.5423	41.4196	32.3498
AT1G14180	39.0557	-0.226147	1.32528	-0.17064	0.864506	0.981735	24.0602	86.3735	15.7189	77.9567	30.2251	0
AT1G14182	12.1441	-2.01572	1.67801	-1.20126	0.22965	0.706879	13.8809	5.87004	38.7733	0	5.59725	8.7432
AT1G14185	81.1727	-1.4538	1.01431	-1.43329	0.151774	0.607015	80.5091	139.204	137.278	0	54.853	75.1915
AT1G14190	11.7417	-1.17583	1.79742	-0.654177	0.512998	0.894429	3.70157	15.933	29.342	0	2.2389	19.235
AT1G14200	766.904	-0.785791	0.263397	-2.98329	0.00285166	0.0667996	796.763	1091.83	1023.83	585.821	498.155	605.03
AT1G14205	41.5907	0.267502	0.808417	0.330896	0.740723	0.959603	43.4934	35.2203	34.5816	24.0749	57.0919	55.0822
AT1G14210	204.398	-0.364264	0.480454	-0.758167	0.448351	0.87025	308.156	156.814	225.304	107.764	255.234	173.115
AT1G14220	0	NA	NA	NA	NA	NA	0	0	0	0	0	0
AT1G14225	0	NA	NA	NA	NA	NA	0	0	0	0	0	0
AT1G14230	234.854	0.253643	0.390918	0.648839	0.516443	0.895395	200.81	193.711	248.359	202.917	324.64	238.689
AT1G14240	1.4572	4.09344	3.93833	1.03939	0.298625	NA	0	0	0	0	0	8.7432
AT1G14250	242.227	-1.2986	0.543543	-2.38914	0.016888	0.207066	362.754	257.443	412.883	261.384	54.853	104.044
AT1G14260	3.63372	-2.46593	3.32762	-0.74105	0.458663	NA	0	1.67715	16.7668	0	3.35835	0
AT1G14270	2298.56	0.264597	0.196109	1.34923	0.177262	0.641195	2121.92	2134.18	2008.88	2287.11	2752.73	2486.57
AT1G14280	870.194	0.353273	0.381495	0.926024	0.354434	0.816234	696.82	558.493	1037.45	574.357	1554.91	799.129
AT1G14290	802.49	1.35649	0.292522	4.63722	3.53e-06	0.000461738	464.547	315.305	573.216	1153.3	1047.8	1260.77
AT1G14300	177.595	0.582065	0.488278	1.19208	0.233231	0.711204	156.391	74.6334	195.962	251.066	192.545	194.973
AT1G14310	337.331	-0.10601	0.33687	-0.314691	0.752996	0.96198	288.722	358.911	401.356	335.902	367.179	271.914
AT1G14315	4.3716	5.67304	3.88733	1.45937	0.144464	0.594651	0	0	0	0	0	26.2296
AT1G14320	8481.95	-0.0635197	0.178607	-0.355639	0.722111	0.957581	8717.19	9242.8	8045.99	8554.6	7481.28	8849.87
AT1G14330	591.056	0.518503	0.347645	1.49147	0.135838	0.57879	595.953	355.557	506.149	858.67	785.853	444.155
AT1G14340	233.755	0.891139	0.510952	1.74408	0.0811459	0.46855	197.109	105.661	188.627	498.693	146.648	265.793
AT1G14345	1054.02	-0.121802	0.349176	-0.348828	0.727219	0.957982	1024.41	1141.3	1129.67	1507.54	510.469	1010.71
AT1G14350	84.7071	-1.13545	0.636413	-1.78413	0.0744019	0.451039	157.317	134.172	57.636	45.8569	66.0475	47.2133
AT1G14360	123.374	0.857938	0.553504	1.55001	0.121138	0.552942	138.809	55.3461	69.1632	136.424	145.528	194.973
AT1G14370	304.317	0.228558	0.461377	0.495382	0.62033	0.932954	327.589	254.928	258.838	202.917	211.576	570.057
AT1G14380	206.696	0.0591677	0.395577	0.149573	0.881101	0.984082	215.616	207.129	184.435	190.306	260.832	181.859
AT1G14390	26.3803	-0.911496	1.3028	-0.699645	0.484149	0.885704	3.70157	11.7401	88.0259	4.58569	25.7473	24.481
AT1G14400	1556.46	0.308862	0.273006	1.13134	0.257912	0.737709	1238.17	1575.69	1357.07	2366.21	1331.02	1470.61
AT1G14410	369.888	-0.142006	0.371051	-0.382713	0.701932	0.953635	496.936	323.691	343.72	239.602	445.541	369.837
AT1G14420	0	NA	NA	NA	NA	NA	0	0	0	0	0	0
AT1G14430	36.0437	-0.997283	1.19638	-0.833582	0.404517	0.847154	49.0458	38.5746	56.5881	0	33.5835	38.4701
AT1G14440	7.2591	-0.184113	2.6813	-0.0686656	0.945256	0.993038	23.1348	0	0	11.4642	8.95559	0
AT1G14450	1068.29	0.335136	0.242516	1.38191	0.166999	0.626216	905.034	1031.45	898.074	1164.76	1009.74	1400.66
AT1G14455	4.69738	-5.61823	3.2912	-1.70704	0.0878137	0.484092	16.6571	0	11.5272	0	0	0
AT1G14460	30.6513	1.36659	1.39048	0.98282	0.325696	0.795943	6.47775	34.3817	10.4793	0	78.3614	54.2079
AT1G14470	1.04793	-3.44746	3.94646	-0.873558	0.382359	NA	0	0	6.28756	0	0	0
AT1G14480	34.4712	0.812771	0.940874	0.863846	0.387672	0.834466	33.3141	13.4172	28.294	30.9534	77.242	23.6066
AT1G14490	16.5688	-0.804294	1.87229	-0.429578	0.667503	0.945406	45.3442	0	17.8148	18.3427	17.9112	0
AT1G14500	0.616928	-2.69167	3.97354	-0.677398	0.498153	NA	3.70157	0	0	0	0	0
AT1G14510	415.631	0.112906	0.436642	0.258577	0.795961	0.971614	375.709	329.561	492.526	709.635	373.896	212.46
AT1G14518	2.57629	1.9813	3.83127	0.51714	0.605058	NA	0	0	3.14378	0	12.3139	0
AT1G14520	776.197	1.55841	0.375318	4.15223	3.29e-05	0.00244692	219.318	410.064	551.21	1631.36	976.16	869.074
AT1G14530	292.811	1.76355	0.504154	3.49805	0.00046868	0.0190985	85.1361	111.531	203.298	747.467	231.726	377.706
AT1G14540	375.335	0.478817	0.419348	1.14181	0.253532	0.7326	183.228	440.253	317.522	406.98	303.371	600.658
AT1G14549	0	NA	NA	NA	NA	NA	0	0	0	0	0	0
AT1G14550	0	NA	NA	NA	NA	NA	0	0	0	0	0	0
AT1G14560	810.379	0.0251679	0.268312	0.093801	0.925267	0.991031	931.87	698.535	779.658	674.096	957.129	820.987
AT1G14570	620.96	-0.150628	0.267269	-0.563584	0.573037	0.918991	706.074	682.602	571.12	652.314	533.977	579.674
AT1G14580	147.512	-0.48928	0.453997	-1.07772	0.281161	0.760564	167.496	173.586	176.052	95.153	119.781	153.006
AT1G14590	271.171	1.03271	0.360905	2.86145	0.00421702	0.0851649	210.064	150.105	173.956	417.297	358.224	317.378
AT1G14600	206.893	0.11883	0.443246	0.268091	0.788629	0.968874	289.648	152.621	152.997	205.209	184.709	256.176
AT1G14610	573.612	-0.155493	0.33291	-0.467073	0.640448	0.936236	571.892	496.438	745.076	748.613	427.63	452.024
AT1G14620	153.226	0.38027	0.452714	0.839977	0.400921	0.843782	154.54	114.885	129.943	218.967	148.887	152.132
AT1G14630	0	NA	NA	NA	NA	NA	0	0	0	0	0	0
AT1G14640	64.9169	-0.826203	0.703121	-1.17505	0.239974	0.719011	96.2408	60.3776	92.2176	64.1996	53.7336	22.7323
AT1G14642	93.9487	0.587838	0.598012	0.982986	0.325614	0.795935	63.8521	75.472	85.9301	158.206	60.4502	119.782
AT1G14650	555.43	-0.335049	0.350037	-0.957182	0.338475	0.807215	729.209	678.409	451.657	467.74	335.835	669.729
AT1G14660	189.493	-0.0725937	0.430291	-0.168708	0.866026	0.982112	131.406	206.29	245.215	174.256	189.187	190.602
AT1G14670	214.434	0.48669	0.430188	1.13134	0.257912	0.737709	140.66	174.424	221.113	243.041	176.873	330.493
AT1G14680	10.7809	0.361778	2.08014	0.173921	0.861928	0.981116	0	8.38577	19.9106	24.0749	12.3139	0
AT1G14685	617.972	0.263508	0.303753	0.867508	0.385664	0.833715	409.023	701.889	574.264	616.775	634.728	771.15
AT1G14686	0	NA	NA	NA	NA	NA	0	0	0	0	0	0
AT1G14687	83.0553	0.386693	0.779759	0.495914	0.619955	0.932944	42.568	30.1888	143.566	97.4458	40.3002	144.263
AT1G14688	3.17177	5.20569	3.9214	1.32751	0.184341	NA	0	0	0	0	19.0306	0
AT1G14690	409.196	-0.321191	0.309951	-1.03626	0.300079	0.774105	468.248	488.052	407.644	310.68	350.388	430.166
AT1G14700	1643.14	-0.794807	0.254751	-3.11994	0.0018089	0.0488156	2213.54	1957.24	2084.33	1071.9	941.457	1590.39
AT1G14710	392.313	-0.0503026	0.375871	-0.13383	0.893537	0.986004	393.292	467.088	337.433	359.976	249.637	546.45
AT1G14720	862.482	0.0813844	0.321919	0.25281	0.800415	0.972316	867.092	701.051	946.279	647.728	1301.92	710.822
AT1G14730	38.7923	0.621231	0.827089	0.751106	0.452589	0.871921	43.4934	25.1573	23.0544	33.2462	57.0919	50.7106
AT1G14740	856.302	-0.487578	0.29732	-1.63991	0.101024	0.511433	1160.44	929.144	908.553	933.187	706.372	500.111
AT1G14750	4.05254	-5.40583	3.46303	-1.56101	0.11852	0.548805	0	11.7401	12.5751	0	0	0
AT1G14755	0	NA	NA	NA	NA	NA	0	0	0	0	0	0
AT1G14760	3.33451	3.11389	3.86524	0.805613	0.420466	NA	0	0	2.09585	0	17.9112	0
AT1G14770	202.556	0.610944	0.445663	1.37087	0.170417	0.63063	150.839	198.743	130.991	194.892	349.268	190.602
AT1G14780	256.577	1.04541	0.53414	1.95719	0.0503253	0.372127	192.482	123.271	186.531	614.482	293.296	129.399
AT1G14790	120.702	-0.234985	0.524097	-0.448362	0.653892	0.941209	145.287	168.554	77.5466	105.471	111.945	115.41
AT1G14800	1.85078	-4.27581	3.92917	-1.08822	0.276497	NA	11.1047	0	0	0	0	0
AT1G14810	313.065	0.870094	0.484158	1.79713	0.0723155	0.444787	164.72	320.337	179.196	452.837	174.634	586.669
AT1G14820	327.344	-0.0539599	0.372721	-0.144773	0.88489	0.984525	372.008	387.423	241.023	238.456	336.954	388.198
AT1G14830	436.424	-0.0994217	0.339309	-0.293013	0.769512	0.964303	469.174	490.568	394.021	566.332	390.688	307.761
AT1G14840	203.229	-0.0315401	0.542453	-0.0581436	0.953634	0.994202	260.035	74.6334	281.892	149.035	267.548	186.23
AT1G14850	94.241	-0.272724	0.627972	-0.434292	0.664076	0.944278	106.42	62.8933	140.422	76.8102	50.3752	128.525
AT1G14860	108.559	-1.2146	0.654901	-1.85463	0.0636495	0.418715	102.719	163.523	188.627	120.374	48.1363	27.9782
AT1G14870	861.011	-0.477994	0.441981	-1.08148	0.279483	0.759516	1293.7	1040.67	672.769	1020.32	240.682	897.927
AT1G14880	20.2781	0.601798	2.14146	0.281022	0.778693	0.966862	38.8665	0	9.43135	73.371	0	0
AT1G14890	28.7339	-1.22516	1.06225	-1.15337	0.248759	0.727533	20.3586	41.9289	58.6839	12.6106	5.59725	33.2242
AT1G14900	35.6544	-0.814068	1.00101	-0.813251	0.416074	0.854224	80.5091	45.2832	10.4793	40.1248	15.6723	21.858
AT1G14910	188.479	-0.611793	0.594997	-1.02823	0.303842	0.775928	197.109	316.144	169.764	207.502	199.262	41.093
AT1G14920	239.27	-0.596993	0.482885	-1.23631	0.216345	0.692888	310.932	244.865	308.091	154.767	319.043	97.9239
AT1G14930	0.349309	-1.84943	4.02565	-0.459412	0.645938	NA	0	0	2.09585	0	0	0
AT1G14940	0	NA	NA	NA	NA	NA	0	0	0	0	0	0
AT1G14950	0	NA	NA	NA	NA	NA	0	0	0	0	0	0
AT1G14960	3.31844	-5.11534	3.9193	-1.30517	0.191837	NA	0	0	19.9106	0	0	0
AT1G14970	47.2567	-0.416176	0.827366	-0.503013	0.614955	0.931069	75.8822	52.8304	33.5337	30.9534	21.2695	69.0713
AT1G14980	1152.6	-0.0445022	0.26266	-0.169429	0.865459	0.98205	1302.95	1242.77	965.141	1357.36	881.006	1166.34
AT1G14990	154.473	0.122738	0.63588	0.193021	0.846942	0.979463	111.047	77.1491	255.694	268.263	66.0475	148.634
AT1G15000	166.034	-0.143247	0.513385	-0.279026	0.780225	0.967206	126.779	145.912	250.455	89.4209	194.784	188.853
AT1G15002	33.1929	0.086799	1.44333	0.0601381	0.952046	0.993972	2.77618	61.2162	32.4858	34.3926	68.2864	0
AT1G15010	12497.8	0.198564	0.231525	0.857636	0.391094	0.836514	8623.73	14251.6	12041.7	11218.9	15583.8	13266.9
AT1G15015	105.214	-0.41551	0.566522	-0.73344	0.46329	0.877519	144.361	120.755	95.3614	97.4458	120.9	52.4592
AT1G15020	415.223	0.020721	0.345016	0.0600581	0.952109	0.993972	458.069	345.494	432.794	518.183	450.019	286.777
AT1G15030	756.449	0.0243118	0.316271	0.0768703	0.938727	0.992562	631.117	883.861	735.645	781.859	505.991	1000.22
AT1G15040	357.154	-0.829291	0.34319	-2.41642	0.0156739	0.198057	427.531	503.985	439.082	291.191	296.654	184.482
AT1G15045	0	NA	NA	NA	NA	NA	0	0	0	0	0	0
AT1G15050	22.9338	-0.238021	1.05922	-0.224714	0.822202	0.977059	24.0602	29.3502	20.9585	36.6855	13.4334	13.1148
AT1G15060	326.197	-0.278908	0.370238	-0.753322	0.451256	0.871252	409.023	338.785	324.858	403.54	216.054	264.919
AT1G15080	119.541	0.0296992	0.66026	0.0449811	0.964122	0.995442	112.898	62.0547	180.244	42.4176	177.992	141.64
AT1G15090	0.37315	2.10723	4.03022	0.522856	0.601075	NA	0	0	0	0	2.2389	0
AT1G15100	2064.87	0.881701	0.267501	3.29607	0.000980492	0.0317507	1178.95	1495.18	1684.02	3005.92	3188.19	1836.95
AT1G15110	272.467	0.369111	0.415695	0.887936	0.374575	0.828986	218.393	246.542	248.359	450.544	190.306	280.657
AT1G15120	959.288	0.103983	0.358844	0.289771	0.771991	0.964621	1074.38	1002.94	696.872	1300.04	495.916	1185.58
AT1G15125	20.0676	1.73266	1.43838	1.20459	0.228362	0.705641	19.4332	8.38577	0	29.807	11.1945	51.5849
AT1G15130	691.112	0.168889	0.277938	0.607651	0.543419	0.905649	643.148	566.878	741.933	772.688	836.228	585.795
AT1G15140	646.86	0.381305	0.268241	1.4215	0.155171	0.611289	507.115	614.677	563.785	816.252	621.294	758.036
AT1G15150	5.19519	-3.71257	2.99045	-1.24148	0.21443	0.690266	26.8364	0	2.09585	0	2.2389	0
AT1G15160	96.7293	1.15122	0.856369	1.3443	0.178851	0.644448	70.3298	30.1888	79.6425	132.985	254.115	13.1148
AT1G15165	96.602	-0.327956	0.657636	-0.498688	0.617999	0.932494	123.077	77.1491	122.608	29.807	114.184	112.787
AT1G15170	189.736	-0.0396825	0.51178	-0.0775382	0.938195	0.992524	232.273	92.2435	252.551	177.695	250.757	132.897
AT1G15175	58.867	-0.788211	0.894858	-0.880822	0.378414	0.82994	46.2696	89.7278	88.0259	22.9284	10.075	96.1752
AT1G15180	407.302	0.167889	0.310123	0.541363	0.588257	0.922669	330.365	419.289	401.356	459.715	362.701	470.384
AT1G15190	78.8708	-0.180135	0.646427	-0.278663	0.780504	0.96733	58.2997	107.338	85.9301	59.6139	49.2558	112.787
AT1G15200	3289.16	0.121686	0.208861	0.582618	0.560151	0.912319	3676.58	2969.4	2805.3	3150.37	3887.85	3245.48
AT1G15210	0	NA	NA	NA	NA	NA	0	0	0	0	0	0
AT1G15215	165.638	-0.024463	0.657096	-0.0372289	0.970302	0.996461	186.929	93.9207	220.065	272.848	182.47	37.5958
AT1G15220	183.77	0.736126	0.559862	1.31483	0.188566	0.656511	193.407	139.204	80.6904	402.394	144.409	142.514
AT1G15230	810.79	0.447129	0.265248	1.6857	0.0918534	0.493291	693.119	754.72	609.894	1018.02	1046.68	742.298
AT1G15240	1314.27	0.248385	0.265317	0.936182	0.34918	0.812935	1462.12	1054.09	1087.75	1232.4	1819.1	1230.17
AT1G15250	296.885	0.172374	0.408863	0.421594	0.673321	0.947152	277.618	244.026	316.474	198.331	283.221	461.641
AT1G15260	496.24	-0.171855	0.415006	-0.414103	0.678798	0.94784	580.221	471.281	526.06	197.185	657.117	545.576
AT1G15270	2045.38	-0.00564976	0.312408	-0.0180845	0.985571	0.997041	1949.8	2685.96	1512.16	2580.59	1222.44	2321.32
AT1G15280	1608.79	0.0209805	0.214672	0.0977329	0.922144	0.990766	1647.2	1566.46	1577.13	1861.79	1562.75	1437.38
AT1G15290	1075.41	-0.94441	0.251561	-3.7542	0.000173897	0.00916507	1632.39	1520.34	1092.99	776.127	699.656	730.932
AT1G15300.1	38.208	-0.44708	0.972841	-0.459561	0.645831	0.938726	11.1047	81.342	39.8212	17.1963	36.9418	42.8417
AT1G15310	95.4497	0.368711	0.566507	0.650849	0.515144	0.894732	97.1662	77.1491	75.4508	121.521	133.214	68.197
AT1G15320	6.29183	6.19359	3.04611	2.03328	0.0420243	0.337482	0	0	0	34.3926	3.35835	0
AT1G15330	4.36636	-5.51182	3.91039	-1.40953	0.158678	0.617028	0	0	26.1982	0	0	0
AT1G15340	1543.34	0.131235	0.314914	0.416733	0.676873	0.947368	1493.58	1388.68	1537.31	956.116	2422.49	1461.86
AT1G15350	960.744	0.601351	0.268569	2.23909	0.0251498	0.263425	836.555	678.409	775.466	1313.8	857.498	1302.74
AT1G15360	0	NA	NA	NA	NA	NA	0	0	0	0	0	0
AT1G15370	1527.85	0.688123	0.243893	2.82142	0.0047812	0.091888	920.765	1409.65	1179.97	2119.73	1702.68	1834.32
AT1G15380	22.6822	-1.28518	1.26423	-1.01657	0.309357	0.781019	9.25392	32.7045	54.4922	28.6605	2.2389	8.7432
AT1G15385	0.349309	-1.84943	4.02565	-0.459412	0.645938	NA	0	0	2.09585	0	0	0
AT1G15390	492.655	0.0510908	0.31657	0.161389	0.871787	0.983247	440.487	625.579	385.637	466.594	462.332	575.303
AT1G15400	1626.1	0.0173557	0.218178	0.0795481	0.936597	0.992007	1487.11	1489.31	1872.65	1650.85	1744.1	1512.57
AT1G15405	14.0431	-0.756754	1.37821	-0.549084	0.582948	0.921557	38.8665	6.70862	7.33549	9.17137	13.4334	8.7432
AT1G15410	91.9963	0.631817	0.584612	1.08075	0.27981	0.759842	77.7329	91.4049	47.1567	92.8601	146.648	96.1752
AT1G15415	16.8798	-1.00047	1.53188	-0.6531	0.513692	0.894429	12.9555	16.7715	37.7254	10.3178	23.5084	0
AT1G15420	619.574	0.942705	0.281449	3.34947	0.000809665	0.0277408	339.619	487.213	445.369	718.806	860.856	865.577
AT1G15430	1350.94	-0.225969	0.266333	-0.848446	0.39619	0.840636	1015.16	1843.19	1511.11	1194.57	1269.46	1272.14
AT1G15440	78.6594	-1.11453	0.576654	-1.93276	0.0532658	0.384108	96.2408	108.176	118.416	49.2961	52.6141	47.2133
AT1G15450	0	NA	NA	NA	NA	NA	0	0	0	0	0	0
AT1G15460	3.93171	0.117569	3.23894	0.0362987	0.971044	0.996461	9.25392	0	2.09585	0	0	12.2405
AT1G15470	293.303	0.527835	0.38632	1.36631	0.17184	0.632068	230.423	166.877	323.81	390.93	291.057	356.723
AT1G15480	39.185	0.355383	1.57986	0.224945	0.822022	0.977059	99.017	0	4.19171	38.9783	1.11945	91.8036
AT1G15490	86.0619	1.25602	0.876867	1.4324	0.152029	0.607294	76.8076	6.70862	69.1632	68.7853	57.0919	237.815
AT1G15500	615.558	-0.14238	0.326046	-0.436688	0.662338	0.943522	575.594	631.449	731.453	541.111	404.121	809.62
AT1G15510	20.1264	0.223158	1.68233	0.132648	0.894472	0.986203	18.5078	36.0588	1.04793	9.17137	55.9725	0
AT1G15520	62.2684	0.104337	0.818428	0.127484	0.898557	0.986967	46.2696	98.9521	34.5816	43.564	123.139	27.1039
AT1G15530	23.5706	1.19323	1.10826	1.07667	0.281627	0.76079	11.1047	19.2873	12.5751	61.9068	11.1945	25.3553
AT1G15540	0	NA	NA	NA	NA	NA	0	0	0	0	0	0
AT1G15550	135.299	-0.594269	0.511829	-1.16107	0.245614	0.724784	118.45	211.322	158.237	114.642	136.573	72.5686
AT1G15560.1	0.186575	1.11658	4.08047	0.27364	0.784361	NA	0	0	0	0	1.11945	0
AT1G15570	31.039	0.594465	1.32708	0.447951	0.654188	0.941209	20.3586	6.70862	47.1567	95.153	1.11945	15.7378
AT1G15580	76.5647	1.1653	1.18326	0.984825	0.32471	0.795325	0	15.0944	126.799	104.324	39.1807	173.99
AT1G15590	1.4572	4.09344	3.93833	1.03939	0.298625	NA	0	0	0	0	0	8.7432
AT1G15600	2.62296	4.93786	3.92437	1.25826	0.2083	NA	0	0	0	0	0	15.7378
AT1G15610	0.154232	-0.806974	4.08047	-0.197765	0.843229	NA	0.925392	0	0	0	0	0
AT1G15620	0	NA	NA	NA	NA	NA	0	0	0	0	0	0
AT1G15630	3.11421	-5.02488	3.82548	-1.31353	0.189005	NA	9.25392	0	9.43135	0	0	0
AT1G15640	0.14572	1.11658	4.08047	0.27364	0.784361	NA	0	0	0	0	0	0.87432
AT1G15650	0	NA	NA	NA	NA	NA	0	0	0	0	0	0
AT1G15660	66.5057	0.995737	0.644982	1.54382	0.122631	0.555503	34.2395	57.0233	41.9171	108.91	73.8836	83.0604
AT1G15670	283.36	0.559314	0.524028	1.06734	0.28582	0.763998	241.527	115.724	330.097	325.584	535.097	152.132
AT1G15680	0	NA	NA	NA	NA	NA	0	0	0	0	0	0
AT1G15690	3240.92	-0.429606	0.233224	-1.84203	0.0654702	0.4244	3571.09	4273.39	3315.64	2944.01	2081.06	3260.34
AT1G15700	87.2863	0.115703	0.622774	0.185786	0.852613	0.979815	54.5981	122.432	74.4029	63.0532	85.0781	124.153
AT1G15710	237.262	-0.367905	0.420418	-0.875092	0.381524	0.830676	234.124	326.207	242.071	181.135	148.887	291.149
AT1G15720	55.8171	-1.04901	0.905035	-1.15909	0.246421	0.725171	49.0458	161.007	15.7189	25.2213	35.8224	48.0876
AT1G15730	1207.43	-0.127712	0.251643	-0.507512	0.611796	0.930499	1050.32	1411.33	1321.44	968.726	1110.49	1382.3
AT1G15740	2379.33	-0.390475	0.229797	-1.69922	0.0892777	0.488215	2856.69	2730.41	2511.88	1645.11	1965.75	2566.13
AT1G15750	809.398	-0.0905768	0.277194	-0.326764	0.743847	0.960552	1021.63	658.283	824.719	668.364	879.887	803.5
AT1G15757	0	NA	NA	NA	NA	NA	0	0	0	0	0	0
AT1G15760	7.82938	6.50921	2.9289	2.22241	0.0262556	0.269497	0	0	0	45.8569	1.11945	0
AT1G15770	0	NA	NA	NA	NA	NA	0	0	0	0	0	0
AT1G15772	0.559725	2.69612	3.98931	0.675836	0.499145	NA	0	0	0	0	3.35835	0
AT1G15780	177.915	-0.598698	0.460741	-1.29942	0.193798	0.664248	310.006	190.357	142.518	136.424	142.17	146.011
AT1G15790	291.974	0.469676	0.35493	1.32329	0.185737	0.654025	295.2	217.192	222.161	393.223	286.579	337.488
AT1G15800	270.952	0.636484	0.529835	1.20129	0.22964	0.706879	136.958	199.581	299.707	558.307	300.012	131.148
AT1G15810	388.719	-0.124477	0.405977	-0.30661	0.75914	0.964	322.962	555.138	338.481	212.088	425.391	478.253
AT1G15820	58144.8	-0.120395	0.29037	-0.414625	0.678416	0.947685	45486.7	77096.3	59126.2	53767.2	34162.2	79230
AT1G15825	7.52474	-5.30178	2.29617	-2.30896	0.0209456	0.238266	6.47775	30.1888	7.33549	1.14642	0	0
AT1G15830	5.04813	-0.273808	2.67714	-0.102276	0.918537	0.990023	0	5.03146	11.5272	12.6106	1.11945	0
AT1G15840	69.2237	1.03133	0.748916	1.3771	0.168482	0.628696	16.6571	70.4405	49.2526	66.4924	139.931	72.5686
AT1G15850	0	NA	NA	NA	NA	NA	0	0	0	0	0	0
AT1G15860	827.98	-0.160362	0.306474	-0.523248	0.600802	0.927031	611.684	1154.72	855.109	935.48	661.594	749.292
AT1G15870	57.8927	0.113142	0.850043	0.133101	0.894113	0.986004	34.2395	85.5349	47.1567	13.7571	78.3614	88.3063
AT1G15880	2960.76	-0.651194	0.219302	-2.9694	0.00298385	0.0682312	3414.7	3574.86	3864.76	1784.98	2515.4	2609.85
AT1G15885	749.463	-0.901956	0.451558	-1.99743	0.0457784	0.35529	896.705	1197.49	834.15	572.064	832.87	163.498
AT1G15890	528.04	-0.690454	0.285449	-2.41883	0.0155704	0.197881	697.746	546.752	711.543	398.955	447.78	365.466
AT1G15900	97.9852	-0.614309	0.640262	-0.959466	0.337324	0.806019	135.107	78.8263	141.47	131.838	60.4502	40.2187
AT1G15910	291.905	-0.812789	0.417427	-1.94714	0.0515179	0.376597	347.947	224.739	543.874	184.574	203.74	246.558
AT1G15920	641.798	0.181943	0.289668	0.62811	0.529932	0.900365	640.371	629.772	533.395	691.292	833.99	521.969
AT1G15930	2061.89	-0.0586783	0.256707	-0.228581	0.819195	0.976963	2249.63	2110.7	1951.24	2451.05	1371.33	2237.39
AT1G15940	189.907	-0.20539	0.596272	-0.344457	0.730503	0.958507	285.946	183.648	140.422	71.0781	340.313	118.033
AT1G15950	246.142	-0.0608458	0.369853	-0.164513	0.869327	0.982349	233.199	246.542	274.557	240.749	195.904	285.903
AT1G15960	43.1157	0.338114	1.14307	0.295794	0.767387	0.964303	59.2251	35.2203	19.9106	1.14642	47.0169	96.1752
AT1G15970	291.825	0.297453	0.386331	0.769943	0.441333	0.867873	167.496	323.691	294.468	293.484	308.968	362.843
AT1G15980	585.134	0.140594	0.416585	0.337492	0.735746	0.959127	539.504	534.174	596.271	961.848	252.995	626.013
AT1G15990	20.9018	-1.14671	1.44768	-0.7921	0.428302	0.860167	31.4633	18.4487	36.6775	0	5.59725	33.2242
AT1G16000	231.748	0.171306	0.429019	0.399296	0.689675	0.950515	307.23	211.322	135.183	259.091	260.832	216.831
AT1G16010	1002	0.0561428	0.241922	0.23207	0.816484	0.976415	819.897	992.876	1134.91	1068.46	985.115	1010.71
AT1G16020	320.167	-0.310317	0.393364	-0.78888	0.430182	0.861114	424.755	233.963	404.5	335.902	319.043	202.842
AT1G16022	0	NA	NA	NA	NA	NA	0	0	0	0	0	0
AT1G16025	0	NA	NA	NA	NA	NA	0	0	0	0	0	0
AT1G16030	42.8375	0.97766	0.883702	1.10632	0.268587	0.747944	32.3887	13.4172	40.8692	25.2213	91.7948	53.3335
AT1G16040	887.353	0.111923	0.34453	0.324856	0.74529	0.961106	899.481	898.955	759.747	820.838	1408.27	536.833
AT1G16060	98.3151	-0.609415	0.732127	-0.83239	0.405189	0.847889	80.5091	172.747	102.697	143.303	70.5253	20.1094
AT1G16070	0	NA	NA	NA	NA	NA	0	0	0	0	0	0
AT1G16080	1166.93	-0.179931	0.235622	-0.763645	0.445079	0.869204	1230.77	1272.12	1215.6	1308.07	945.934	1029.07
AT1G16090	164.914	-0.59448	0.465757	-1.27637	0.201823	0.67408	141.585	171.908	281.892	122.667	145.528	125.902
AT1G16100	0	NA	NA	NA	NA	NA	0	0	0	0	0	0
AT1G16110	1735.32	-0.95685	0.224708	-4.25819	2.06e-05	0.00170995	2480.98	2237.32	2153.49	976.751	1376.92	1186.45
AT1G16120	19.3157	-4.04807	1.56924	-2.57963	0.00989049	0.148501	39.7919	45.2832	24.1023	0	6.71669	0
AT1G16130	734.498	-0.544879	0.322811	-1.68792	0.0914264	0.492278	876.346	844.447	894.93	468.886	441.063	881.315
AT1G16140	10.6573	-1.10798	2.13948	-0.517875	0.604546	0.928204	0	39.4131	4.19171	8.02495	12.3139	0
AT1G16150	31.2539	-1.38334	1.32323	-1.04542	0.295828	0.771336	11.1047	68.7633	55.5402	26.3677	25.7473	0
AT1G16160	10.1924	1.31688	2.5481	0.516809	0.60529	0.928728	16.6571	0.838577	0	0	43.6585	0
AT1G16170	835.171	0.190256	0.276617	0.687794	0.491582	0.88767	674.611	976.943	688.488	1050.12	778.017	842.845
AT1G16180	3035.81	-0.0238472	0.210874	-0.113088	0.909961	0.988954	2961.26	2803.36	3418.34	2595.5	3524.03	2912.36
AT1G16190	255.103	0.197314	0.35515	0.555578	0.578499	0.921183	259.11	222.223	231.592	269.409	307.848	240.438
AT1G16210	950.563	0.379858	0.289501	1.31211	0.189483	0.657713	733.836	710.275	1034.3	1042.1	1360.13	822.735
AT1G16220	139.614	-0.235262	0.555463	-0.423543	0.671899	0.946966	113.823	228.093	111.08	130.692	73.8836	180.11
AT1G16225	0	NA	NA	NA	NA	NA	0	0	0	0	0	0
AT1G16230	9.89145	-2.11466	2.16811	-0.975347	0.329388	0.799428	19.4332	27.6731	1.04793	0	11.1945	0
AT1G16240	2304.04	0.389478	0.203617	1.9128	0.0557741	0.392643	2001.62	2046.13	1936.57	2439.58	3016.92	2383.4
AT1G16250	189.211	-0.412458	0.407673	-1.01174	0.311664	0.783029	264.662	201.259	182.339	151.328	163.44	172.241
AT1G16260	988.243	-0.108304	0.313516	-0.345449	0.729757	0.957986	1063.28	1036.48	975.62	793.324	1409.39	651.369
AT1G16270	272.675	-0.344747	0.361134	-0.954623	0.339768	0.808324	288.722	374.006	252.551	231.577	221.651	267.542
AT1G16280	135.947	-0.237484	0.557399	-0.426058	0.670065	0.945948	114.749	172.747	154.045	143.303	55.9725	174.864
AT1G16290	0	NA	NA	NA	NA	NA	0	0	0	0	0	0
AT1G16300	96.8928	0.235685	0.574594	0.410177	0.681676	0.94816	108.271	51.9918	106.889	87.128	118.662	108.416
AT1G16310	2.93041	-4.9386	3.92093	-1.25955	0.207833	NA	17.5825	0	0	0	0	0
AT1G16320	1285.76	0.361285	0.223873	1.6138	0.106571	0.522612	953.154	1184.07	1239.7	1452.52	1440.73	1444.38
AT1G16330	13.6983	-0.531875	1.63732	-0.324844	0.745299	0.961106	4.62696	25.1573	18.8627	0	13.4334	20.1094
AT1G16340	83.7596	0.347475	0.765972	0.453639	0.650089	0.940282	74.0314	89.7278	57.636	26.3677	61.5697	193.225
AT1G16350	200.223	0.77133	0.46338	1.66457	0.0959978	0.502232	127.704	181.971	134.135	306.095	141.051	310.384
AT1G16360	8.5074	-6.47613	2.3187	-2.793	0.00522219	0.0973054	32.3887	9.22435	9.43135	0	0	0
AT1G16370	2723.84	-0.364409	0.206703	-1.76296	0.0779076	0.460535	2874.27	3303.16	3021.17	2006.24	2462.79	2675.42
AT1G16380	37.7641	-0.53818	1.07766	-0.499397	0.617499	0.932494	64.7775	27.6731	41.9171	2.29284	31.3446	58.5795
AT1G16390	86.0047	1.59282	0.905304	1.75943	0.0785038	0.462753	15.7317	46.9603	66.0194	38.9783	33.5835	314.755
AT1G16400	17.2698	-1.79546	1.82064	-0.986169	0.32405	0.794898	36.0903	44.4446	0	0	5.59725	17.4864
AT1G16410	102.864	-1.37837	0.863006	-1.59717	0.110227	0.531457	87.9123	320.337	37.7254	40.1248	15.6723	115.41
AT1G16420	179.638	0.29733	0.574115	0.517892	0.604534	0.928204	157.317	112.369	213.777	370.294	120.9	103.17
AT1G16430	178.019	0.385946	0.429036	0.899565	0.368352	0.824641	131.406	161.007	170.812	150.181	223.89	230.821
AT1G16440	7.61134	6.46835	2.83518	2.28146	0.0225212	0.248286	0	0	0	37.8319	7.83614	0
AT1G16445	64.0613	-0.664117	0.768269	-0.864432	0.387351	0.834306	39.7919	62.0547	134.135	33.2462	34.7029	80.4375
AT1G16450	0.746299	3.11322	3.96877	0.784431	0.432788	NA	0	0	0	0	4.4778	0
AT1G16460	1749.01	0.0700096	0.238303	0.293784	0.768923	0.964303	1876.7	1365.2	1877.89	1695.56	2102.33	1576.4
AT1G16470	424.919	-0.300409	0.290638	-1.03362	0.301315	0.774178	437.711	474.635	494.622	413.858	357.104	371.586
AT1G16480	19.2098	-0.345365	1.81455	-0.190331	0.84905	0.97958	43.4934	0	20.9585	18.3427	32.464	0
AT1G16489	1.60256	1.05317	3.85207	0.273403	0.784544	NA	0	0	3.14378	0	5.59725	0.87432
AT1G16490	33.9616	1.2033	1.05077	1.14515	0.252145	0.73103	4.62696	31.8659	25.1503	25.2213	90.6754	26.2296
AT1G16500	37.0929	-0.384114	0.892779	-0.430245	0.667017	0.945364	57.3743	48.6375	19.9106	47.0033	19.0306	30.6012
AT1G16510	73.5967	-1.14697	0.804311	-1.42602	0.153862	0.609654	106.42	111.531	85.9301	98.5923	26.8668	12.2405
AT1G16515	58.9765	-0.00145061	0.918112	-0.00157999	0.998739	0.999607	89.763	69.6019	17.8148	27.5141	22.389	126.776
AT1G16520	17.36	-0.29156	1.58429	-0.184032	0.853988	0.980008	20.3586	32.7045	4.19171	35.5391	0	11.3662
AT1G16530	0	NA	NA	NA	NA	NA	0	0	0	0	0	0
AT1G16540	163.781	-0.323145	0.50124	-0.644692	0.519127	0.896453	217.467	124.109	204.346	161.645	190.306	84.8091
AT1G16550	22.7063	-2.08326	1.33235	-1.5636	0.117912	0.547798	24.0602	45.2832	40.8692	0	19.0306	6.99456
AT1G16560	361.472	0.0713064	0.324904	0.219469	0.826285	0.977513	292.424	420.127	344.768	396.662	381.732	333.116
AT1G16570	163.567	-0.157569	0.49758	-0.316672	0.751493	0.961893	135.107	184.487	198.058	190.306	82.8392	190.602
AT1G16590	209.952	0.246845	0.453215	0.544652	0.585993	0.92201	226.721	192.034	157.189	327.877	139.931	215.957
AT1G16600	1.20492	-3.65801	3.94109	-0.928171	0.353319	NA	5.55235	1.67715	0	0	0	0
AT1G16610	757.015	0.437843	0.279291	1.56769	0.116953	0.546394	618.162	670.023	640.284	1037.51	936.979	639.128
AT1G16620.1	0	NA	NA	NA	NA	NA	0	0	0	0	0	0
AT1G16630	7.14269	-0.11225	2.68976	-0.0417323	0.966712	0.995925	0	15.933	6.28756	20.6356	0	0
AT1G16635	49.293	0.320161	0.75194	0.42578	0.670268	0.945948	50.8966	42.7674	37.7254	71.0781	62.6891	30.6012
AT1G16640	7.0068	6.35291	2.86883	2.21446	0.0267972	0.27152	0	0	0	0	12.3139	29.7269
AT1G16650	446.849	0.105994	0.314334	0.337201	0.735966	0.959127	496.936	380.714	413.931	359.976	517.185	512.352
AT1G16660.1	0	NA	NA	NA	NA	NA	0	0	0	0	0	0
AT1G16670	279.932	-0.844695	0.38	-2.22288	0.0262237	0.269409	318.335	409.226	351.056	267.116	151.126	182.733
AT1G16680	143.709	0.226334	0.481857	0.469712	0.638561	0.935915	136.958	114.047	146.71	141.01	111.945	211.585
AT1G16690	225.427	1.55122	0.490103	3.16509	0.00155033	0.0433282	140.66	88.0506	115.272	431.054	425.391	152.132
AT1G16700	779.807	0.37565	0.28801	1.30429	0.192133	0.661909	558.937	716.984	760.795	1055.85	655.997	930.277
AT1G16705	14.6204	0.997861	1.92882	0.517343	0.604917	0.928628	0	0	29.342	10.3178	35.8224	12.2405
AT1G16710	365.223	0.230318	0.34639	0.66491	0.506108	0.891683	407.173	291.825	309.139	376.026	495.916	311.258
AT1G16720	1374.37	-0.0576653	0.244469	-0.23588	0.813526	0.9753	1338.12	1211.74	1655.73	1606.14	1195.57	1238.91
AT1G16730	427.232	0.252891	0.332104	0.761483	0.446368	0.869204	422.904	421.804	324.858	549.136	335.835	508.854
AT1G16740	843.093	0.100702	0.281941	0.357174	0.720961	0.957581	783.807	1013	643.427	906.819	996.31	715.194
AT1G16750	240.792	-0.342738	0.383231	-0.894338	0.371141	0.826386	318.335	235.64	253.598	262.531	193.665	180.984
AT1G16760	2.70942	0.288751	3.25202	0.0887912	0.929248	NA	1.85078	3.35431	2.09585	0	8.95559	0
AT1G16770	42.518	0.140673	0.788915	0.178311	0.858478	0.980494	53.6727	35.2203	32.4858	49.2961	30.2251	54.2079
AT1G16780	183.271	-0.661516	0.481704	-1.37328	0.169664	0.629794	210.064	244.865	219.017	71.0781	177.992	176.613
AT1G16790	138.582	0.210719	0.609252	0.345866	0.729444	0.957982	45.3442	224.739	115.272	147.888	124.259	173.99
AT1G16800	79.8313	-0.218555	0.700501	-0.311999	0.755042	0.963001	95.3154	77.1491	84.8821	90.5673	107.467	23.6066
AT1G16810	930.55	0.0226892	0.292547	0.0775575	0.93818	0.992524	702.373	1069.19	998.675	882.745	729.881	1200.44
AT1G16820	486.626	0.235752	0.334014	0.705815	0.480303	0.88518	415.501	566.878	358.391	575.504	386.21	617.27
AT1G16825	262.9	1.70761	0.422313	4.04348	5.27e-05	0.00362671	179.526	94.7592	95.3614	345.073	513.827	348.854
AT1G16830	9.84693	-0.0455821	2.46246	-0.0185108	0.985231	0.997041	0	18.4487	11.5272	0	29.1057	0
AT1G16840	818.723	0.677038	0.28188	2.40186	0.0163118	0.202131	469.174	794.971	625.613	1090.25	1026.53	905.796
AT1G16850	479.254	2.09422	0.406089	5.15704	2.51e-07	5.82e-05	100.868	238.156	206.442	674.096	1106.02	549.947
AT1G16858	0	NA	NA	NA	NA	NA	0	0	0	0	0	0
AT1G16860	0	NA	NA	NA	NA	NA	0	0	0	0	0	0
AT1G16870	140.597	0.456883	0.500157	0.91348	0.36099	0.820832	95.3154	171.07	89.0738	136.424	156.723	194.973
AT1G16880	8834.61	-0.0459862	0.190017	-0.242012	0.808771	0.974437	8659.82	9371.1	8895.86	8880.18	7299.93	9900.8
AT1G16890	3747.58	0.227791	0.25055	0.909163	0.363264	0.821771	3773.75	3835.65	2746.62	3800.39	5247.98	3081.1
AT1G16900	201.868	0.769665	0.402372	1.91282	0.0557713	0.392643	120.301	156.814	170.812	270.555	213.815	278.908
AT1G16905	0	NA	NA	NA	NA	NA	0	0	0	0	0	0
AT1G16910	0.791583	-3.04874	3.959	-0.770078	0.441254	NA	3.70157	0	1.04793	0	0	0
AT1G16916	350.879	0.58189	0.412303	1.41132	0.158151	0.616327	147.137	385.746	310.187	495.254	348.149	418.799
AT1G16920	180.721	-0.185659	0.543422	-0.341649	0.732615	0.958663	236.9	109.015	231.592	151.328	86.1976	269.291
AT1G16930	136.565	-0.739855	0.57833	-1.2793	0.200793	0.673768	218.393	176.101	118.416	53.8818	79.4809	173.115
AT1G16940	2.62194	-4.77817	3.9226	-1.21811	0.22318	NA	15.7317	0	0	0	0	0
AT1G16950	1.07962	-3.49852	3.94508	-0.886804	0.375185	NA	6.47775	0	0	0	0	0
AT1G16960	10.5104	1.36005	2.39151	0.5687	0.56956	0.91743	0	17.6101	0	28.6605	16.7917	0
AT1G16970	294.737	-0.496757	0.454306	-1.09344	0.2742	0.755129	328.514	415.934	290.276	131.838	400.763	201.094
AT1G16980	1.88415	-1.14291	3.83906	-0.297704	0.765929	NA	2.77618	5.03146	0	0	0	3.49728
AT1G17000	0.462696	-2.27699	3.99552	-0.569887	0.568755	NA	2.77618	0	0	0	0	0
AT1G17010	0	NA	NA	NA	NA	NA	0	0	0	0	0	0
AT1G17020	109.654	-0.293493	0.678217	-0.432743	0.665202	0.944866	163.794	87.2121	111.08	69.9317	189.187	36.7214
AT1G17030	0	NA	NA	NA	NA	NA	0	0	0	0	0	0
AT1G17040	226.608	-0.133563	0.395263	-0.33791	0.735431	0.959127	247.08	204.613	259.886	158.206	240.682	249.181
AT1G17050	617.635	-0.134473	0.382583	-0.351488	0.725222	0.957982	584.848	701.889	651.811	952.676	485.841	328.744
AT1G17060	378.37	-0.131391	0.409148	-0.321133	0.74811	0.961268	545.981	211.322	429.65	287.752	446.66	348.854
AT1G17070	95.9772	0.680411	0.664061	1.02462	0.305542	0.777496	104.569	27.6731	89.0738	167.378	104.109	83.0604
AT1G17080	1345.66	0.0889104	0.230569	0.385613	0.699784	0.952625	1320.53	1246.13	1346.59	1138.4	1428.42	1593.89
AT1G17090	64.0974	0.15764	0.730792	0.215712	0.829213	0.977513	81.4345	29.3502	71.2591	42.4176	60.4502	99.6725
AT1G17100	1626.77	0.241991	0.277318	0.872615	0.382873	0.831598	1741.59	1459.12	1271.14	2244.69	1184.38	1859.68
AT1G17110	906.795	0.0282258	0.272355	0.103636	0.917458	0.989956	1007.75	671.701	1014.39	912.552	1034.37	800.003
AT1G17120	256.937	-0.333115	0.427902	-0.778484	0.436284	0.864756	251.707	195.389	412.883	177.695	217.173	286.777
AT1G17130	464.762	0.118251	0.416434	0.283962	0.77644	0.966223	586.699	315.305	434.89	404.687	764.584	282.405
AT1G17140	420.487	-0.197426	0.456387	-0.432584	0.665317	0.944915	505.264	540.044	302.851	246.481	238.443	689.839
AT1G17145	1102.62	0.537883	0.285747	1.88238	0.059785	0.406744	1001.27	839.416	857.205	1813.64	1028.77	1075.41
AT1G17147	1381.12	-0.51404	0.252656	-2.03455	0.0418964	0.337063	1965.53	1636.06	1272.18	1226.67	960.487	1225.8
AT1G17150	0.139763	-0.806974	4.08047	-0.197765	0.843229	NA	0	0.838577	0	0	0	0
AT1G17160	506.574	0.116052	0.350627	0.330985	0.740656	0.959603	346.097	469.603	643.427	374.88	597.786	607.653
AT1G17170	88.9693	-0.00158416	0.671135	-0.00236042	0.998117	0.999607	111.972	33.5431	121.56	103.178	104.109	59.4538
AT1G17180	2.79447	-4.86698	3.92165	-1.24105	0.214586	NA	0	0	16.7668	0	0	0
AT1G17190	217.707	0.642037	0.442177	1.45199	0.146504	0.597964	234.124	127.464	148.806	252.213	194.784	348.854
AT1G17200	1390.83	-0.163297	0.284837	-0.5733	0.566442	0.915042	1495.43	1424.74	1489.1	856.377	1297.44	1781.86
AT1G17210	577.535	-0.171692	0.309627	-0.554511	0.579229	0.921301	734.761	514.048	586.839	419.59	678.386	531.587
AT1G17220	719.2	-0.189083	0.254693	-0.742397	0.457847	0.874549	788.434	732.917	777.562	745.174	574.277	696.833
AT1G17230	90.1201	-0.632529	0.648367	-0.975573	0.329276	0.799386	73.106	133.334	122.608	41.2712	51.4947	118.908
AT1G17232	0	NA	NA	NA	NA	NA	0	0	0	0	0	0
AT1G17235	6.00058	-0.950858	2.90186	-0.327672	0.74316	0.960385	0	22.6416	1.04793	0	12.3139	0
AT1G17240	33.0931	-0.839098	0.947996	-0.885128	0.376088	0.829508	23.1348	43.606	60.7798	10.3178	25.7473	34.9728
AT1G17250	0	NA	NA	NA	NA	NA	0	0	0	0	0	0
AT1G17255	32.1197	0.562687	0.907185	0.620256	0.535089	0.902341	21.284	25.1573	31.4378	19.4892	48.1363	47.2133
AT1G17260	37.1904	-0.613653	0.909858	-0.67445	0.500025	0.890014	18.5078	54.5075	61.8277	38.9783	33.5835	15.7378
AT1G17270	109.112	-1.11225	0.691072	-1.60946	0.107515	0.525603	168.421	142.558	136.231	97.4458	95.1532	14.8634
AT1G17275.1	3.01681	-1.60837	3.80882	-0.422274	0.672825	NA	0	0	13.6231	0	4.4778	0
AT1G17277.1	0.873273	-3.18303	3.95439	-0.804935	0.420857	NA	0	0	5.23964	0	0	0
AT1G17280	1510.9	0.371172	0.235474	1.57628	0.114962	0.542186	1488.03	1136.27	1328.77	1423.86	1959.04	1729.41
AT1G17285	0	NA	NA	NA	NA	NA	0	0	0	0	0	0
AT1G17290	5405.22	-0.218396	0.266632	-0.819093	0.412734	0.852433	7239.34	5205.89	4994.42	5971.71	5779.72	3240.23
AT1G17300	34.3516	0.65057	0.886082	0.73421	0.462821	0.877519	14.8063	27.6731	37.7254	43.564	52.6141	29.7269
AT1G17310	2.6245	-0.868064	3.74375	-0.23187	0.816639	NA	0.925392	9.22435	0	0	5.59725	0
AT1G17330	478.995	0.13446	0.370732	0.362688	0.716838	0.957581	504.339	383.23	482.047	651.167	574.277	278.908
AT1G17340	781.226	-0.0772387	0.317069	-0.243602	0.807539	0.974293	875.421	741.302	789.089	1090.25	664.953	526.341
AT1G17345	19.4103	2.49169	2.02473	1.23063	0.218461	0.695536	17.5825	0	0	0	40.3002	58.5795
AT1G17350	476.562	0.191888	0.354714	0.540966	0.588531	0.923029	513.593	296.856	525.012	415.005	444.421	664.483
AT1G17360	1083.87	0.402691	0.279964	1.43837	0.150329	0.60542	843.958	836.9	1120.23	915.991	1571.71	1214.43
AT1G17370	2104.29	0.439803	0.209203	2.10228	0.0355288	0.313686	1647.2	1673.8	2037.17	2664.28	2339.65	2263.61
AT1G17380	6736.81	0.449869	0.214715	2.0952	0.0361536	0.316497	4949	5581.57	6553.74	8819.42	8336.54	6180.57
AT1G17390.1	0.154232	-0.806974	4.08047	-0.197765	0.843229	NA	0.925392	0	0	0	0	0
AT1G17400	1.1181	-3.55438	3.94364	-0.901295	0.367432	NA	0	6.70862	0	0	0	0
AT1G17410	611.687	1.36423	0.316692	4.30776	1.65e-05	0.00146227	263.737	382.391	380.398	1018.02	995.19	630.385
AT1G17420	8569.03	0.234887	0.199262	1.17878	0.238484	0.717158	7171.79	6958.52	9488.98	9768.66	9572.41	8453.8
AT1G17430	70.5716	-0.0208181	0.633666	-0.0328535	0.973791	0.996461	70.3298	82.1806	60.7798	76.8102	45.8974	87.432
AT1G17440	406.863	0.276084	0.319352	0.864514	0.387306	0.834306	407.173	291.825	405.548	379.466	470.169	486.996
AT1G17450	45.1111	0.183176	0.99506	0.184086	0.853946	0.980008	66.6282	10.0629	50.3005	30.9534	15.6723	97.0495
AT1G17455	92.1633	0.134046	0.668076	0.200644	0.840977	0.97754	156.391	36.0588	71.2591	81.3959	110.825	97.0495
AT1G17460	28.5742	-1.00537	1.11042	-0.905397	0.365255	0.823278	53.6727	34.3817	26.1982	35.5391	19.0306	2.62296
AT1G17470	536.689	-0.0485487	0.281833	-0.17226	0.863233	0.981116	606.132	520.757	510.341	577.796	445.541	559.565
AT1G17480	4.59083	-2.3746	3.02366	-0.78534	0.432254	0.861937	15.7317	0	7.33549	0	4.4778	0
AT1G17490	258.742	-0.0477395	0.366299	-0.130329	0.896306	0.986602	311.857	237.317	239.975	277.434	210.456	275.411
AT1G17495.1	1.9212	-4.32517	3.92842	-1.10099	0.270899	NA	0	0	11.5272	0	0	0
AT1G17500	59.635	-0.320241	0.88815	-0.360571	0.71842	0.957581	45.3442	121.594	31.4378	102.032	42.5391	14.8634
AT1G17510	203.265	0.232553	0.470391	0.494382	0.621037	0.932954	198.959	111.531	250.455	168.524	297.773	192.35
AT1G17520	913.164	0.606314	0.265353	2.28494	0.0223166	0.247227	806.017	563.524	802.712	1165.91	1200.05	940.768
AT1G17530	279.533	-0.221415	0.364281	-0.607812	0.543312	0.905626	267.438	317.821	317.522	319.852	199.262	255.301
AT1G17540	4.18556	5.60533	3.45782	1.62106	0.105005	0.519617	0	0	0	20.6356	4.4778	0
AT1G17545	1.54232	-4.01287	3.93363	-1.02014	0.307661	NA	9.25392	0	0	0	0	0
AT1G17550	377.687	-0.0458278	0.392255	-0.116832	0.906994	0.988266	403.471	458.702	288.18	502.133	390.688	222.952
AT1G17560	30.711	-1.26254	1.28898	-0.979492	0.327337	0.797526	74.9568	18.4487	36.6775	0	35.8224	18.3607
AT1G17570	0	NA	NA	NA	NA	NA	0	0	0	0	0	0
AT1G17580	242.053	0.574255	0.399538	1.4373	0.150634	0.605866	204.512	232.286	146.71	268.263	235.084	365.466
AT1G17590	173.733	0.378114	0.492334	0.768003	0.442485	0.868008	89.763	180.294	183.387	128.399	230.606	229.946
AT1G17600	34.4781	2.57548	1.05618	2.43848	0.0147491	0.192008	1.85078	14.2558	13.6231	89.4209	21.2695	66.4483
AT1G17610	23.5662	2.00553	1.67342	1.19846	0.230736	0.707731	13.8809	14.2558	0	0	66.0475	47.2133
AT1G17615	0.186575	1.11658	4.08047	0.27364	0.784361	NA	0	0	0	0	1.11945	0
AT1G17620	1350.84	-0.01544	0.254436	-0.0606832	0.951612	0.993972	1463.97	1283.86	1325.63	1630.21	1411.63	989.73
AT1G17630	11.5995	-2.08717	2.10436	-0.991835	0.321278	0.793482	5.55235	1.67715	49.2526	0	0	13.1148
AT1G17640	299.284	-0.0113752	0.482261	-0.0235873	0.981182	0.996868	324.813	366.458	209.585	251.066	500.394	143.389
AT1G17650	145.266	-0.89433	0.56809	-1.57427	0.115424	0.543202	149.914	254.928	161.381	161.645	97.3921	46.339
AT1G17660	0	NA	NA	NA	NA	NA	0	0	0	0	0	0
AT1G17665	8.59086	-0.514977	2.6556	-0.193921	0.846237	0.979156	0.925392	29.3502	0	0	21.2695	0
AT1G17670	0	NA	NA	NA	NA	NA	0	0	0	0	0	0
AT1G17680	406.964	-0.114284	0.341414	-0.334736	0.737824	0.959603	508.966	317.821	442.225	447.104	423.152	302.515
AT1G17690	173.85	-0.282226	0.810159	-0.348359	0.727571	0.957982	190.631	176.101	205.394	249.92	214.934	6.12024
AT1G17700	8.48411	0.0287332	2.92997	0.00980664	0.992176	0.998553	0	25.1573	0	0	25.7473	0
AT1G17710	169.853	-2.16972	1.64551	-1.31857	0.187314	0.655612	263.737	340.462	229.496	77.9567	107.467	0
AT1G17720	1782.77	0.180444	0.275713	0.654463	0.512814	0.894429	1786.93	1557.24	1669.35	2334.11	2153.82	1195.2
AT1G17730	907.49	0.257878	0.255263	1.01025	0.312377	0.783979	894.854	766.46	818.431	1184.25	818.317	962.627
AT1G17744	1.6498	-0.955938	3.52966	-0.27083	0.786522	NA	4.62696	0.838577	1.04793	1.14642	2.2389	0
AT1G17745	331.453	-1.08925	0.383665	-2.83907	0.00452447	0.0888551	561.713	413.419	377.254	194.892	291.057	150.383
AT1G17750	20.7591	-0.630689	1.12474	-0.560741	0.574974	0.920137	33.3141	10.9015	31.4378	25.2213	12.3139	11.3662
AT1G17760	377.332	0.115561	0.381465	0.302941	0.761935	0.964303	504.339	254.089	328.001	463.154	427.63	286.777
AT1G17770	3.08464	-5.01259	3.92023	-1.27865	0.201021	NA	18.5078	0	0	0	0	0
AT1G17780	697.147	0.480233	0.302779	1.58609	0.112719	0.537065	654.252	426.836	665.434	952.676	846.303	637.379
AT1G17790	278.411	0.114384	0.437602	0.261389	0.793793	0.970673	174.899	363.104	264.078	182.281	386.21	299.892
AT1G17800	0	NA	NA	NA	NA	NA	0	0	0	0	0	0
AT1G17810	0.37315	2.10723	4.03022	0.522856	0.601075	NA	0	0	0	0	2.2389	0
AT1G17820	110.959	-0.0876041	0.579657	-0.151131	0.879873	0.983664	143.436	83.0192	116.32	120.374	146.648	55.9565
AT1G17830	387.457	-0.938512	0.403351	-2.32679	0.0199767	0.230569	676.462	453.67	398.212	197.185	197.023	402.187
AT1G17840	782.42	0.573399	0.274021	2.09254	0.0363904	0.317002	541.354	632.287	713.639	731.417	1031.01	1044.81
AT1G17850	85.8189	0.333575	0.670033	0.497848	0.618591	0.932565	129.555	60.3776	37.7254	90.5673	127.617	69.0713
AT1G17860	332.263	-0.312669	0.464783	-0.672722	0.501124	0.890014	474.726	384.907	245.215	236.163	161.201	491.368
AT1G17870	186.722	0.144001	0.4456	0.323162	0.746572	0.961157	198.034	171.07	163.477	147.888	160.081	279.782
AT1G17880	3395.86	0.0777109	0.265578	0.292611	0.76982	0.964303	2990.87	3803.79	3118.63	4324.3	2223.23	3914.33
AT1G17890	197.461	0.595806	0.489249	1.2178	0.223301	0.7014	86.0615	230.609	155.093	245.334	171.276	296.395
AT1G17900.1	0	NA	NA	NA	NA	NA	0	0	0	0	0	0
AT1G17910	7.75	1.611	2.97993	0.540616	0.588772	0.923197	0	0	11.5272	0	0	34.9728
AT1G17920	31.4415	-0.865478	1.15744	-0.747755	0.454608	0.872494	51.822	9.22435	60.7798	3.43926	45.8974	17.4864
AT1G17930	178.664	-0.506935	0.520738	-0.973493	0.330309	0.800396	93.4646	268.345	267.222	155.913	176.873	110.164
AT1G17940	405.887	1.81579	0.555233	3.27032	0.00107427	0.033742	244.304	45.2832	249.407	989.362	556.366	350.602
AT1G17950	0	NA	NA	NA	NA	NA	0	0	0	0	0	0
AT1G17960	11.2344	0.599326	2.40684	0.249009	0.803353	0.9727	26.8364	0	0	0	5.59725	34.9728
AT1G17970	1530.72	-0.339953	0.23001	-1.478	0.139409	0.586108	1463.05	1909.44	1758.42	1148.71	1474.31	1430.39
AT1G17980	1912.11	0.0798408	0.22583	0.353543	0.723681	0.957972	1502.84	2085.54	1988.97	1908.79	2186.28	1800.23
AT1G17990	26.221	0.329842	1.02543	0.321662	0.747708	0.961157	24.9856	18.4487	26.1982	45.8569	31.3446	10.4918
AT1G18000	7.86515	0.502142	1.73729	0.289038	0.772552	0.964785	6.47775	10.9015	2.09585	3.43926	19.0306	5.24592
AT1G18010	9.72291	-0.929537	1.54652	-0.601052	0.547806	0.908028	18.5078	13.4172	6.28756	3.43926	12.3139	4.3716
AT1G18020	285.209	-0.0123809	0.413998	-0.0299056	0.976142	0.996651	290.573	368.135	200.154	395.515	213.815	243.061
AT1G18030	992.487	0.334938	0.292959	1.14329	0.252917	0.731898	738.463	892.246	1002.87	1397.49	752.27	1171.59
AT1G18040	102.386	-0.252273	0.552063	-0.456963	0.647697	0.939212	105.495	126.625	101.649	74.5174	134.334	71.6943
AT1G18050	0	NA	NA	NA	NA	NA	0	0	0	0	0	0
AT1G18060	3408.34	0.157288	0.218936	0.718418	0.472499	0.882421	3069.53	3598.34	3000.22	4124.82	2823.25	3833.89
AT1G18070	1541.39	0.202044	0.21982	0.919135	0.358025	0.817572	1356.62	1439.84	1504.82	1751.73	1388.12	1807.22
AT1G18075	27.4671	-0.406565	1.22923	-0.330747	0.740836	0.959603	43.4934	25.1573	25.1503	61.9068	5.59725	3.49728
AT1G18080	677.956	-0.339003	0.359962	-0.941773	0.346309	0.81184	602.43	813.42	856.157	768.102	316.804	710.822
AT1G18090	31.947	0.519809	1.23804	0.419863	0.674586	0.94734	52.7474	0.838577	25.1503	66.4924	32.464	13.9891
AT1G18100	4.67733	0.178897	3.07141	0.0582459	0.953553	0.994202	11.1047	0	2.09585	0	0	14.8634
AT1G18120	0	NA	NA	NA	NA	NA	0	0	0	0	0	0
AT1G18130	5.41701	-5.82567	2.70477	-2.15385	0.031252	0.295095	15.7317	12.5787	4.19171	0	0	0
AT1G18140	19.5568	-4.37965	2.16656	-2.02147	NA	NA	111.047	0	1.04793	0	0	5.24592
AT1G18150	379.486	-0.387495	0.36167	-1.07141	0.283986	0.762137	488.607	462.056	339.528	243.041	445.541	298.143
AT1G18160	885.383	-0.244674	0.258726	-0.945688	0.344308	0.810702	1103.99	906.502	869.78	941.212	814.959	675.849
AT1G18170	639.122	0.613448	0.287913	2.13067	0.0331162	0.30354	405.322	605.453	505.101	695.878	719.806	903.173
AT1G18180	27.3931	-1.16785	1.28568	-0.908349	0.363694	0.821978	50.8966	25.1573	37.7254	0	31.3446	19.235
AT1G18190	199.287	0.273052	0.389178	0.701613	0.482921	0.885701	210.064	162.684	168.716	220.113	213.815	220.329
AT1G18191	27.8115	-2.91508	1.40149	-2.07998	0.0375269	0.321519	13.8809	124.109	9.43135	0	8.95559	10.4918
AT1G18200	1331.82	0.366884	0.217292	1.68844	0.0913263	0.492083	1056.8	1228.52	1205.12	1469.71	1399.31	1631.48
AT1G18210	4299.5	-0.373805	0.287336	-1.30093	0.193281	0.66332	3696.94	5485.97	5377.96	4174.12	2244.5	4817.5
AT1G18220	1.48674	1.71804	3.89084	0.441561	0.658807	NA	0	0	2.09585	4.58569	2.2389	0
AT1G18230	0.186575	1.11658	4.08047	0.27364	0.784361	NA	0	0	0	0	1.11945	0
AT1G18240.1	0.43716	2.37332	4.00972	0.591892	0.553923	NA	0	0	0	0	0	2.62296
AT1G18250	4.62329	-1.94982	3.03719	-0.641981	0.520885	0.897057	0	4.19289	17.8148	5.73211	0	0
AT1G18260	338.131	-0.124898	0.353478	-0.353341	0.723833	0.957972	291.499	357.234	409.74	241.895	391.807	336.613
AT1G18265	105.117	-0.336252	0.535369	-0.628074	0.529955	0.900365	88.8377	159.33	103.745	89.4209	86.1976	103.17
AT1G18270	749.806	0.0533335	0.254024	0.209955	0.833703	0.977513	719.03	638.157	850.917	792.177	754.509	744.046
AT1G18280	0	NA	NA	NA	NA	NA	0	0	0	0	0	0
AT1G18290	25.8922	1.01417	1.06436	0.952838	0.340672	0.808719	6.47775	34.3817	10.4793	32.0998	36.9418	34.9728
AT1G18300	4045.65	-0.835684	0.261773	-3.1924	0.00141095	0.040656	4693.59	6781.58	4081.68	3448.44	2128.07	3140.56
AT1G18310	15.5516	-0.0561875	1.5989	-0.0351412	0.971967	0.996461	28.6872	0	18.8627	19.4892	20.1501	6.12024
AT1G18320	8.53973	-0.919581	2.18385	-0.421082	0.673695	0.947259	0	20.9644	12.5751	0	8.95559	8.7432
AT1G18330	242.569	-0.163899	0.437522	-0.374607	0.707953	0.955843	256.334	240.672	272.461	225.845	128.737	331.367
AT1G18335	495.6	0.261254	0.390831	0.668457	0.503842	0.891166	449.741	403.356	499.861	259.091	691.819	669.729
AT1G18340	339.748	0.251223	0.403057	0.623295	0.53309	0.901473	406.247	182.81	341.624	413.858	422.032	271.914
AT1G18350	1.57189	-4.03479	3.93323	-1.02582	0.304976	NA	0	0	9.43135	0	0	0
AT1G18360	243.93	0.320311	0.431689	0.741994	0.458091	0.874579	203.586	244.026	203.298	349.659	150.006	313.007
AT1G18370	9.43066	-0.106732	2.61282	-0.0408495	0.967416	0.996373	0	0	29.342	26.3677	0	0.87432
AT1G18382	3.75674	0.303322	2.26216	0.134085	0.893335	0.985914	2.77618	4.19289	3.14378	3.43926	1.11945	7.86888
AT1G18390	1121.41	-0.0946443	0.25302	-0.374059	0.70836	0.956092	1103.99	1133.76	1237.6	860.963	1050.04	1342.08
AT1G18400	328.249	0.67655	0.420013	1.61078	0.107227	0.52458	237.826	186.164	334.289	248.773	582.113	380.329
AT1G18410	14.3636	1.49102	1.76798	0.843342	0.399037	0.842612	11.1047	0	11.5272	47.0033	15.6723	0.87432
AT1G18415	15.9059	-1.35823	1.39323	-0.974877	0.329621	0.799781	37.9411	11.7401	18.8627	11.4642	14.5528	0.87432
AT1G18420	0	NA	NA	NA	NA	NA	0	0	0	0	0	0
AT1G18430	0	NA	NA	NA	NA	NA	0	0	0	0	0	0
AT1G18440	376.351	0.22217	0.331119	0.670968	0.502241	0.890616	420.128	298.534	323.81	434.494	329.118	452.024
AT1G18450	989.074	0.0982014	0.287824	0.341186	0.732964	0.958663	1165.07	850.318	850.917	1256.48	731	1080.66
AT1G18460	1925.96	1.33682	0.321542	4.15753	3.22e-05	0.00240809	1071.6	1075.89	1129.67	4383.92	1679.17	2215.53
AT1G18470	1848.38	0.190741	0.25862	0.737531	0.460799	0.876834	1802.66	1493.51	1883.13	1467.42	2572.49	1871.05
[truncated: 31,611 more rows]
