# Supplementary material for: Companion cells with high florigen production express other small proteins and reveal a nitrogen-sensitive FT repressor
Source: bioRxiv preprint, doi:10.1101/2024.08.17.608367, version 2 (2025-08-08)
Supplement: Supplemental data 4 [file 608367_file06.xlsx]

## Sheet: DataS4_35St_v_FTt
Row.names	baseMean	log2FoldChange	lfcSE	stat	pvalue	padj	35S_T1.counts	35S_T2.counts	35S_T3.counts	FT_T1.counts	FT_T2.counts	FT_T3.counts
AT1G01010	13.7407	-4.13499	1.76438	-2.34359	0.0190991	0.264742	16.335	13.5737	48.6341	0	0	3.90172
AT1G01020	535.637	-0.384224	0.664332	-0.578362	0.56302	0.9668	556.069	673.685	590.628	447.624	156.691	789.122
AT1G01030	91.3989	-0.195754	0.802749	-0.243855	0.807343	0.998923	101.413	67.8686	124.343	23.6724	90.6347	140.462
AT1G01040	242.741	0.466897	0.682248	0.68435	0.493754	0.949087	274.291	169.314	168.464	96.8417	417.841	329.695
AT1G01046	0	NA	NA	NA	NA	NA	0	0	0	0	0	0
AT1G01050	1469.46	-0.601001	0.580864	-1.03467	0.300824	0.833712	2231.76	1603.84	1477.07	1855.06	514.621	1134.42
AT1G01060	170.545	0.569926	0.618616	0.921291	0.356898	0.870225	209.632	112.876	88.7447	301.285	185.878	124.855
AT1G01070	22.3267	3.14486	2.95074	1.06579	0.28652	0.83063	0	0	13.5373	88.2335	0	32.1892
AT1G01073	0	NA	NA	NA	NA	NA	0	0	0	0	0	0
AT1G01080	703.991	0.628267	0.33052	1.90085	0.057322	0.49519	709.89	458.649	490.352	916.768	867.943	780.343
AT1G01090	1849.19	-0.253014	0.280119	-0.903235	0.366401	0.876211	2259.67	1893.18	1878.18	1960.51	1699.02	1404.62
AT1G01100	1873.5	0.530993	0.489603	1.08454	0.278127	0.826342	1766.22	1438.81	1391.34	3488.45	1818.84	1337.31
AT1G01110	39.1331	0.759667	1.69725	0.447588	0.65445	0.986082	9.52872	24.2898	53.1465	81.7774	66.0558	0
AT1G01115	0.119068	0.279992	4.08047	0.0686175	0.945294	NA	0	0.714406	0	0	0	0
AT1G01120	619.922	-0.732018	0.529843	-1.38158	0.167102	0.756893	428.112	765.129	1128.61	494.969	327.207	575.503
AT1G01130	303.767	0.51318	0.642765	0.798395	0.424642	0.916384	334.186	166.457	251.193	200.139	247.325	623.299
AT1G01140	4280.81	0.379775	0.320835	1.18371	0.236529	0.806201	3893.84	3841.36	3428.45	3679.98	4725.3	6115.94
AT1G01150	7.51587	-5.78882	2.84915	-2.03177	0.042177	0.420216	40.1568	1.42881	3.50968	0	0	0
AT1G01160	552.947	-0.497613	0.279581	-1.77985	0.0751	0.556741	650.676	695.832	597.146	380.911	505.404	487.715
AT1G01170	1590.76	0.71106	0.439755	1.61695	0.10589	0.649582	1513.02	1040.89	1064.43	2817.02	1765.07	1344.14
AT1G01180	115.383	-1.78665	1.45262	-1.22996	0.218714	0.796075	93.2453	202.891	240.162	114.058	0	41.9435
AT1G01183	1.76523	-3.70179	3.9226	-0.943709	0.345318	NA	0	3.57203	7.01935	0	0	0
AT1G01190	13.0555	-0.290218	3.13514	-0.0925693	0.926246	0.99995	0	17.1457	26.0719	0	0	35.1155
AT1G01200	10.5295	0.634018	3.31003	0.191544	0.848099	0.99995	19.0574	5.71525	0	0	38.4045	0
AT1G01210	161.081	0.396498	0.397501	0.997476	0.318534	0.838898	123.193	157.884	136.877	135.578	222.746	190.209
AT1G01220	240.535	0.450704	0.650304	0.693067	0.488268	0.947135	226.647	205.035	177.991	197.987	503.868	131.683
AT1G01225	49.0868	-1.31879	2.09474	-0.629576	NA	NA	101.413	58.5813	50.6396	0	0	83.8869
AT1G01230	537.393	-0.336944	0.408992	-0.82384	0.410031	0.907873	430.154	705.833	664.833	348.63	502.331	572.577
AT1G01240	1143.74	0.194817	0.329678	0.590932	0.554566	0.965643	1265.96	883.72	1051.4	961.961	1321.12	1378.28
AT1G01250	42.7656	-1.15909	1.49314	-0.776281	0.437583	0.921262	70.1042	20.7178	86.2378	47.3448	0	32.1892
AT1G01260	339.265	0.0916384	1.53885	0.0595501	0.952514	0.99995	270.888	350.773	364.004	0	674.384	375.54
AT1G01270	16.297	6.54554	3.84599	1.70191	0.0887714	0.604862	0	0	1.00276	0	96.7795	0
AT1G01280	0	NA	NA	NA	NA	NA	0	0	0	0	0	0
AT1G01290	578.639	0.352686	0.521433	0.676378	0.498801	0.950925	559.472	540.091	424.17	1052.35	396.335	499.42
AT1G01300	454.775	-0.127462	0.373316	-0.341431	0.732779	0.995374	401.568	464.364	558.039	522.945	316.453	465.28
AT1G01305	1.65778	1.90946	3.85989	0.494694	0.620816	NA	0	2.14322	0	0	0	7.80343
AT1G01310	7.04981	-0.905235	2.77196	-0.326569	0.743994	0.995744	0	26.433	1.00276	12.9122	0	1.95086
AT1G01320	1662.7	0.513548	0.455055	1.12854	0.259092	0.816306	1854.7	1265.93	989.729	1310.59	2543.92	2011.34
AT1G01340	13.4168	1.60434	2.49364	0.643375	0.519981	0.956172	1.36125	12.1449	6.51797	0	0	60.4766
AT1G01350	134.607	-1.09223	1.44309	-0.75687	0.449128	0.926587	152.46	195.747	201.556	129.122	0	128.757
AT1G01355	11.6594	2.36347	3.74776	0.630637	0.528278	0.960418	0	11.4305	0	0	0	58.5258
AT1G01360	202.608	-0.0692093	1.6141	-0.042878	0.965799	0.99995	186.491	185.031	251.193	92.5376	0	500.395
AT1G01370	13.5234	-6.63621	1.90889	-3.47647	0.000508056	0.0201371	28.5862	35.0059	17.5484	0	0	0
AT1G01380	6.77896	-1.98722	2.11924	-0.937706	0.348396	0.86356	10.2093	17.1457	5.51521	0	0	7.80343
AT1G01390	10.565	0.852666	3.25226	0.262177	0.793185	0.998906	0	0	22.5622	19.3683	0	21.4594
AT1G01400	0.250691	-0.916356	4.01444	-0.228265	0.81944	NA	0	0	1.50415	0	0	0
AT1G01410	0	NA	NA	NA	NA	NA	0	0	0	0	0	0
AT1G01420	115.108	0.101398	0.836087	0.121276	0.903472	0.99995	159.946	90.7296	81.7253	208.748	118.286	31.2137
AT1G01430	2253.42	-0.917883	0.378591	-2.42447	0.0153306	0.231068	2879.72	2878.34	3080.49	2188.62	1347.23	1146.13
AT1G01440	295.08	0.684313	0.708335	0.966086	0.334001	0.849583	202.145	201.463	275.76	129.122	671.311	290.678
AT1G01448	406.378	0.0881671	0.608035	0.145003	0.884708	0.99995	500.939	385.779	296.317	170.011	503.868	581.356
AT1G01450	0	NA	NA	NA	NA	NA	0	0	0	0	0	0
AT1G01453	1.24781	-3.19622	3.92922	-0.81345	0.41596	NA	7.48685	0	0	0	0	0
AT1G01460	97.2611	-0.714452	1.62061	-0.440854	0.659319	0.986958	151.098	130.736	81.2239	21.5204	0	198.988
AT1G01470	9534.28	0.373668	0.601097	0.621644	0.534176	0.96096	5169.33	9924.53	9825.59	12314	4540.95	15431.3
AT1G01471	3.01693	-4.47111	3.91606	-1.14174	0.253564	0.814282	9.52872	8.57287	0	0	0	0
AT1G01480	76.2389	0.502996	0.865183	0.581376	0.560987	0.966159	115.025	40.7212	34.094	55.953	50.694	160.946
AT1G01490	1293.99	0.322883	0.370275	0.872009	0.383203	0.888269	1233.29	1296.65	921.039	1048.04	1459.37	1805.52
AT1G01500	310.591	0.574773	0.401531	1.43145	0.1523	0.740714	255.234	232.896	259.215	464.84	405.552	245.808
AT1G01510	249.898	-0.419831	1.52312	-0.275638	0.782826	0.998184	300.835	259.329	297.821	329.262	0	312.137
AT1G01520	108.412	0.0986127	1.51202	0.0652192	0.948	0.99995	158.585	51.4372	104.288	0	218.138	118.027
AT1G01530	4.58962	-0.620738	3.38105	-0.183594	0.854332	0.99995	0	9.28728	7.52074	0	0	10.7297
AT1G01540	694.435	-0.477355	0.538823	-0.885922	0.375659	0.882639	982.139	669.399	773.132	763.973	268.832	709.137
AT1G01550	3781.14	-0.283154	0.327077	-0.865712	0.386648	0.891607	3088.67	4605.06	4759.62	3462.63	2932.57	3838.31
AT1G01560	191.927	-0.842966	1.4815	-0.568994	0.56936	0.967923	219.161	242.898	277.264	215.204	0	197.037
AT1G01570	38.3487	-0.209707	1.66938	-0.12562	0.900033	0.99995	23.1412	41.4356	59.1631	10.7602	0	95.5921
AT1G01580	0	NA	NA	NA	NA	NA	0	0	0	0	0	0
AT1G01590	2.74072	-4.33366	3.91699	-1.10638	0.268564	0.822148	0	11.4305	5.01382	0	0	0
AT1G01600	6.22525	-5.5168	2.34738	-2.35019	0.0187639	0.262228	13.6125	15.7169	8.02212	0	0	0
AT1G01610	356.598	-0.917892	0.61976	-1.48104	0.138595	0.718159	362.772	412.212	624.221	299.133	99.8518	341.4
AT1G01620	5860.5	0.0561329	0.513034	0.109414	0.912874	0.99995	4266.14	5311.61	7661.62	7304.02	3110.77	7508.85
AT1G01630	618.722	-0.60913	0.662404	-0.919575	0.357795	0.871138	611.199	754.413	875.915	807.014	164.371	499.42
AT1G01640	13.419	1.248	3.25293	0.383655	0.701234	0.991112	0	21.4322	2.50691	0	0	56.5749
AT1G01650	704.616	0.558034	0.521366	1.07033	0.284471	0.828694	404.29	708.691	598.149	555.226	651.341	1310
AT1G01660	2.26874	-4.05993	3.91912	-1.03593	0.300236	0.833712	13.6125	0	0	0	0	0
AT1G01670	15.2968	0.432891	3.73766	0.115819	NA	NA	0	0	39.1078	0	0	52.6732
AT1G01680	0	NA	NA	NA	NA	NA	0	0	0	0	0	0
AT1G01690	6.71579	-5.62755	3.8982	-1.44363	0.148843	0.735228	19.7381	0	20.5567	0	0	0
AT1G01695	0.358673	2.24941	4.07431	0.552097	0.580882	NA	0	0	0	2.15204	0	0
AT1G01700	22.1925	1.3872	1.61656	0.858114	0.390829	0.894735	6.80623	20.0034	10.0276	49.4969	0	46.8206
AT1G01710	367.858	0.0534588	0.588201	0.0908853	0.927584	0.99995	396.803	433.645	252.697	492.817	165.908	465.28
AT1G01720	4000.9	-0.487981	0.419295	-1.16381	0.2445	0.811222	3005.63	5843.84	5164.74	3172.1	2663.74	4155.33
AT1G01725	615.479	-0.338813	1.61237	-0.210134	0.833563	0.99995	980.778	613.675	467.79	862.967	0	767.663
AT1G01730	800.213	0.645294	0.400686	1.61047	0.107295	0.65178	556.75	770.844	545.003	830.687	1330.33	767.663
AT1G01740	73.5717	0.756124	0.646765	1.16908	0.242369	0.810291	83.7166	30.7195	50.1382	64.5611	95.2433	117.052
AT1G01750	85.1691	1.86714	0.959896	1.94515	0.0517573	0.469616	72.8267	25.7186	11.5318	79.6254	244.253	77.0589
AT1G01760	56.8798	-0.986257	1.58218	-0.623353	0.533053	0.960861	72.146	86.4432	67.6866	103.298	0	11.7052
AT1G01770	486.192	0.571782	0.392123	1.45817	0.144794	0.729105	443.086	462.935	268.24	503.577	554.562	684.751
AT1G01780	83.8994	-0.484768	1.48583	-0.326262	0.744226	0.995744	57.1723	123.592	112.811	105.45	0	104.371
AT1G01790	896.402	-0.330797	0.265753	-1.24475	0.213223	0.795211	998.474	916.583	1081.98	779.038	691.282	911.051
AT1G01800	1201.16	0.0700879	0.755306	0.0927941	0.926067	0.99995	1138.68	1125.9	1250.95	2070.26	267.296	1353.9
AT1G01810	26.6321	0.261197	1.53814	0.169814	0.865156	0.99995	12.9318	32.1483	27.576	45.1928	0	41.9435
AT1G01820	436.967	0.0450778	0.479265	0.0940561	0.925065	0.99995	449.211	438.645	401.607	660.676	258.079	413.582
AT1G01830	198.812	-0.647931	1.10877	-0.584368	0.558973	0.966159	253.192	212.893	261.722	148.491	308.773	7.80343
AT1G01840	69.6481	0.0547175	1.83065	0.0298897	NA	NA	91.8841	32.8627	80.2212	8.60815	204.312	0
AT1G01860	68.7551	-1.64974	1.46315	-1.12753	0.25952	0.816754	110.942	102.16	100.276	17.2163	0	81.9361
AT1G01870	0	NA	NA	NA	NA	NA	0	0	0	0	0	0
AT1G01880	3.21483	-4.56246	3.91549	-1.16523	0.243925	0.810912	0	19.289	0	0	0	0
AT1G01890	0	NA	NA	NA	NA	NA	0	0	0	0	0	0
AT1G01900	8.42813	-5.9543	3.91009	-1.5228	0.127808	0.695886	46.2824	4.28644	0	0	0	0
AT1G01910	676.184	-0.0748828	0.546953	-0.136909	0.891103	0.99995	618.686	658.683	803.215	957.657	298.019	720.842
AT1G01920	102.253	-0.394167	1.48593	-0.265267	0.790804	0.998906	104.135	155.026	89.2461	133.426	0	131.683
AT1G01930	109.232	-0.0797355	0.672643	-0.118541	0.905639	0.99995	95.9678	123.592	116.321	185.075	47.6216	86.8132
AT1G01940	228.125	0.985072	0.612757	1.60761	0.107922	0.653882	191.936	160.027	106.794	469.144	296.483	144.364
AT1G01950	421.693	0.12594	0.478341	0.263285	0.792331	0.998906	329.422	443.646	437.707	247.484	592.966	478.936
AT1G01960	214.413	0.344714	0.802233	0.429693	0.667419	0.988734	243.663	160.027	162.448	462.688	64.5196	193.135
AT1G01970	306.461	1.35573	0.571146	2.3737	0.017611	0.25269	181.726	196.462	137.88	621.939	500.795	199.963
AT1G01980	0	NA	NA	NA	NA	NA	0	0	0	0	0	0
AT1G01990	388.302	0.0215362	1.70632	0.0126214	0.98993	0.99995	413.819	437.217	304.841	1069.56	0	104.371
AT1G02000	189.191	-2.05038	1.40677	-1.45751	0.144976	0.729437	217.799	262.901	433.696	107.602	0	113.15
AT1G02010	217.286	1.04235	0.970422	1.07412	0.282771	0.82868	138.166	167.171	120.833	79.6254	708.18	89.7395
AT1G02020	375.725	0.432598	0.492008	0.879251	0.379265	0.885366	257.275	374.349	327.403	395.975	635.979	263.366
AT1G02030	8.56712	-5.97817	3.79883	-1.57369	0.115559	0.671735	42.8792	0	8.5235	0	0	0
AT1G02040	0.66851	-2.31197	3.9481	-0.585592	0.55815	NA	0	0	4.01106	0	0	0
AT1G02050	74.2434	0.40764	1.50863	0.270205	0.787002	0.998906	76.2298	37.1491	78.2157	0	179.733	74.1326
AT1G02060	8.22793	-4.87477	3.08367	-1.58084	0.113916	0.668378	0	5.71525	42.1161	0	1.53618	0
AT1G02065	9.74277	-6.1634	3.75481	-1.64147	0.1007	0.639473	0	51.4372	7.01935	0	0	0
AT1G02070	1.07161	-2.97395	3.93295	-0.756164	0.449551	NA	0	6.42966	0	0	0	0
AT1G02074	0	NA	NA	NA	NA	NA	0	0	0	0	0	0
AT1G02080	195.119	-0.0460616	0.571244	-0.0806339	0.935733	0.99995	240.941	211.464	142.894	105.45	293.411	176.553
AT1G02090	478.995	0.394891	0.576178	0.685363	0.493115	0.949002	479.839	422.214	339.937	596.114	235.036	800.827
AT1G02100	1091.19	0.564123	0.545487	1.03416	0.30106	0.833712	988.945	827.997	825.275	602.571	2021.62	1280.74
AT1G02110	201.017	0.0942836	0.970431	0.0971564	0.922602	0.99995	238.218	177.887	166.96	372.302	21.5065	229.226
AT1G02120	942.409	0.351168	0.320422	1.09595	0.273098	0.824383	847.376	825.139	812.239	923.224	1365.67	880.813
AT1G02130	878.271	-0.165026	0.428584	-0.38505	0.700201	0.991112	837.847	1084.47	861.375	1209.45	669.775	606.717
AT1G02136	3.28968	-4.59644	3.91529	-1.17397	0.240406	0.809038	19.7381	0	0	0	0	0
AT1G02140	2326.07	-0.183041	0.658405	-0.278007	0.781007	0.998062	2189.56	2594.72	2634.76	4138.37	890.986	1508.01
AT1G02145	292.32	-0.984202	0.583901	-1.68556	0.09188	0.613432	345.756	394.352	426.676	90.3856	179.733	317.015
AT1G02150	1171.39	-0.387063	0.508684	-0.760911	0.44671	0.924406	1314.28	1405.24	1261.48	1676.44	717.397	653.538
AT1G02160	331.061	0.424238	0.379722	1.11723	0.263895	0.819299	313.087	239.326	295.816	423.951	270.368	443.82
AT1G02170	624.282	-0.450909	0.447915	-1.00669	0.314086	0.837185	562.875	707.262	894.466	395.975	430.131	754.982
AT1G02180	41.6838	-0.927839	2.22001	-0.417944	0.675988	0.98983	85.0779	67.1542	12.0332	0	0	85.8378
AT1G02190	1.61427	1.30197	3.84695	0.338441	0.735031	NA	0	2.85762	0	0	0	6.82801
AT1G02205	372.062	-0.601887	1.63751	-0.367563	0.713199	0.992307	515.912	350.059	479.322	766.125	0	120.953
AT1G02210	0	NA	NA	NA	NA	NA	0	0	0	0	0	0
AT1G02220	102.896	0.599688	0.85915	0.698002	0.485176	0.946833	75.5491	105.732	64.1769	62.4091	262.687	46.8206
AT1G02228.1	2.15531	-3.98585	3.91977	-1.01686	0.309221	0.836623	12.9318	0	0	0	0	0
AT1G02230	11.5966	6.67654	3.91278	1.70634	0.0879446	0.603349	0	0.714406	0	68.8652	0	0
AT1G02250	10.6564	-0.233647	3.32766	-0.0702137	0.944024	0.99995	32.6699	0	2.00553	0	0	29.2629
AT1G02260	92.9035	-1.34998	1.57305	-0.858197	0.390784	0.894735	156.543	115.019	129.357	15.0643	0	141.437
AT1G02270	892.274	0.224348	0.525593	0.426847	0.669491	0.988874	519.315	991.596	958.643	977.025	556.098	1350.97
AT1G02280	1394.79	0.479388	0.612209	0.783046	0.4336	0.920549	1328.58	1161.62	1004.77	1689.35	2577.71	606.717
AT1G02290	20.2245	-7.21674	1.80292	-4.00282	6.26e-05	0.00403085	46.2824	55.0093	20.0553	0	0	0
AT1G02300	659.014	-0.375775	0.312065	-1.20416	0.22853	0.802098	791.565	639.394	803.716	471.296	565.315	682.801
AT1G02305	903.036	0.18334	0.690848	0.265384	0.790714	0.998906	803.135	770.13	963.657	1435.41	262.687	1183.2
AT1G02310	18.4463	-0.642673	2.26519	-0.283717	0.776627	0.997537	42.8792	17.8602	7.01935	0	0	42.9189
AT1G02320	0.167127	-0.355298	4.06297	-0.087448	0.930315	NA	0	0	1.00276	0	0	0
AT1G02330	356.772	1.06873	0.567106	1.88453	0.0594936	0.503946	264.762	191.461	235.148	243.18	778.844	427.238
AT1G02335	22.4117	-5.768	2.03535	-2.8339	0.00459831	0.10037	114.345	7.14406	11.0304	0	0	1.95086
AT1G02340	391.39	-1.4317	1.50256	-0.95284	0.340671	0.85677	539.734	576.526	597.146	249.636	0	385.295
AT1G02350	106.364	-0.838765	0.68581	-1.22303	0.221319	0.796943	186.491	111.447	110.304	133.426	39.9407	56.5749
AT1G02360	24.6927	-1.67485	2.25049	-0.744215	0.456746	0.930296	5.44498	50.7228	56.6562	0	35.3322	0
AT1G02370	18.1661	-7.06275	1.77671	-3.97518	7.03e-05	0.00432637	49.6855	25.7186	33.5926	0	0	0
AT1G02380	242.242	1.02241	0.389741	2.6233	0.00870813	0.15918	121.832	210.035	147.908	294.829	357.93	320.916
AT1G02390	793.582	-3.50985	1.50139	-2.33774	0.0194008	0.266989	494.813	2103.93	1778.9	109.754	0	274.096
AT1G02391	1.05472	-2.95167	3.93335	-0.750421	0.453001	NA	2.04187	4.28644	0	0	0	0
AT1G02400	1695.35	0.180097	0.621762	0.289656	0.772079	0.997537	884.129	2503.99	1381.81	890.944	2099.96	2411.26
AT1G02405	8.46329	-0.0885799	2.34383	-0.0377928	0.969853	0.99995	4.08374	14.2881	8.02212	0	0	24.3857
AT1G02410	564.708	-0.222857	0.492189	-0.452787	0.650702	0.985382	573.085	660.111	590.628	768.277	281.121	515.027
AT1G02420	3.06544	-4.49584	2.85363	-1.57548	0.115145	0.671154	5.44498	6.42966	6.51797	0	0	0
AT1G02430	12.4663	-4.35726	1.66777	-2.61262	0.00898501	0.162902	25.183	32.1483	14.5401	0	0	2.92629
AT1G02440	15.6053	0.430493	3.12263	0.137862	0.890349	0.99995	0	21.4322	18.5511	0	0	53.6486
AT1G02450	1.19065	-1.18825	3.91665	-0.303384	0.761598	NA	0.680623	0	4.51244	0	0	1.95086
AT1G02460	0	NA	NA	NA	NA	NA	0	0	0	0	0	0
AT1G02470	46.5	-1.23311	2.16314	-0.570055	0.568641	0.967857	102.093	19.289	74.706	0	0	82.9115
AT1G02475	1268.02	-0.408831	0.313141	-1.30558	0.191696	0.779398	1574.96	1376.66	1386.82	1097.54	1330.33	841.796
AT1G02480	0	NA	NA	NA	NA	NA	0	0	0	0	0	0
AT1G02490	0	NA	NA	NA	NA	NA	0	0	0	0	0	0
AT1G02500	8588.28	-0.236456	0.581948	-0.406317	0.68451	0.990923	11423.6	8495	7951.42	14005.5	5209.19	4445.03
AT1G02510	3.45179	-0.413057	3.75701	-0.109943	0.912454	0.99995	0	11.4305	0.501382	0	0	8.77886
AT1G02520	1.30057	4.53012	3.95813	1.14451	0.252412	NA	0	0	0	0	0	7.80343
AT1G02530	0	NA	NA	NA	NA	NA	0	0	0	0	0	0
AT1G02540	0	NA	NA	NA	NA	NA	0	0	0	0	0	0
AT1G02550	0	NA	NA	NA	NA	NA	0	0	0	0	0	0
AT1G02560	2196.78	-0.223261	0.592938	-0.376533	0.70652	0.991112	2616.31	2450.41	2031.1	3671.38	1122.95	1288.54
AT1G02570	0	NA	NA	NA	NA	NA	0	0	0	0	0	0
AT1G02575	0	NA	NA	NA	NA	NA	0	0	0	0	0	0
AT1G02580	1.9579	-3.8521	3.92103	-0.982419	0.325893	0.843102	2.72249	0	9.02488	0	0	0
AT1G02590	13.1233	2.51414	2.10585	1.19388	0.232523	0.804363	4.76436	1.42881	5.51521	0	66.0558	0.975429
AT1G02600	0	NA	NA	NA	NA	NA	0	0	0	0	0	0
AT1G02610	1822.93	1.0503	0.568663	1.84696	0.0647525	0.52485	1282.97	1330.94	948.616	1005	3037.03	3333.04
AT1G02620	159.082	2.02458	1.56318	1.29517	0.195263	0.784185	68.0623	84.2999	36.0995	0	334.888	431.14
AT1G02630	0	NA	NA	NA	NA	NA	0	0	0	0	0	0
AT1G02640	341.458	0.127391	0.872242	0.14605	0.883882	0.99995	155.863	493.655	329.91	98.9937	723.542	246.784
AT1G02650	39.6363	-1.6985	2.10636	-0.806366	0.420032	0.914341	117.067	38.5779	26.5733	0	0	55.5995
AT1G02660	2683.84	0.487844	0.439764	1.10933	0.267287	0.822148	1742.39	2588.29	2373.54	2429.65	2364.18	4605
AT1G02670	24.937	0.0825698	1.95582	0.0422175	0.966325	0.99995	50.3661	8.57287	14.0387	0	1.53618	75.1081
AT1G02680	426.065	0.460625	0.321191	1.43412	0.151539	0.740714	383.871	291.478	399.602	574.594	434.739	472.108
AT1G02681	6.82897	0.439952	3.43749	0.127986	0.89816	0.99995	14.2931	0	3.00829	23.6724	0	0
AT1G02690	20.835	-7.26015	1.76515	-4.11306	3.9e-05	0.00280956	26.5443	62.8677	35.5982	0	0	0
AT1G02700	1.92197	-3.82696	3.92129	-0.975946	0.329091	NA	0	0	11.5318	0	0	0
AT1G02710	10.0477	3.39387	2.28189	1.48731	0.136934	0.713955	2.72249	0	2.50691	15.0643	0	39.9926
AT1G02720	113.864	-0.104962	1.49556	-0.0701824	0.944048	0.99995	127.276	107.875	118.828	172.163	0	157.044
AT1G02730	47.3269	3.74385	3.73554	1.00222	NA	NA	19.7381	0	0	0	264.223	0
AT1G02740	82.8044	1.69315	0.725597	2.33345	0.0196243	0.268857	40.8374	47.8652	29.0802	45.1928	179.733	154.118
AT1G02750	111.703	-0.178351	1.2686	-0.140589	0.888195	0.99995	68.0623	95.016	193.032	2.15204	170.516	141.437
AT1G02760	0	NA	NA	NA	NA	NA	0	0	0	0	0	0
AT1G02770	6.67451	1.58058	2.86034	0.552586	0.580547	0.971305	0.680623	0.714406	8.5235	30.1285	0	0
AT1G02780	4259.03	-0.00621364	0.601436	-0.0103313	0.991757	0.99995	4582.63	4521.48	3699.2	7781.77	2232.07	2737.05
AT1G02790	2.62415	4.47079	3.93439	1.13634	0.255816	0.814706	0.680623	0	0	15.0643	0	0
AT1G02800	0	NA	NA	NA	NA	NA	0	0	0	0	0	0
AT1G02810	0.357203	-1.3789	3.98524	-0.346001	0.729342	NA	0	2.14322	0	0	0	0
AT1G02813	0	NA	NA	NA	NA	NA	0	0	0	0	0	0
AT1G02816	472.856	0.256282	0.509816	0.502694	0.615179	0.978086	253.192	469.365	569.57	570.29	631.371	343.351
AT1G02820	132.083	-0.20123	0.643879	-0.312528	0.75464	0.996427	191.936	128.593	104.288	94.6897	69.1282	203.865
AT1G02830	0	NA	NA	NA	NA	NA	0	0	0	0	0	0
AT1G02840	1186.42	0.512618	0.481838	1.06388	0.287383	0.831166	1152.98	822.996	957.139	1235.27	2112.25	837.894
AT1G02850	748.026	-0.674612	0.413553	-1.63126	0.102836	0.643238	1088.32	1054.46	615.698	727.389	493.114	509.174
AT1G02860	641.733	0.308894	0.476951	0.647644	0.517215	0.95617	506.383	590.1	623.72	445.472	1090.69	594.036
AT1G02870	34.6632	-5.41446	1.30551	-4.14738	3.36e-05	0.00248395	65.3398	83.5855	55.1521	0	0	3.90172
AT1G02880	471.943	-1.44073	1.52098	-0.947238	0.343518	0.860341	505.022	860.859	703.44	391.671	0	370.663
AT1G02890	136.894	0.661017	1.0449	0.632609	0.526989	0.960016	104.816	142.167	71.6977	12.9122	238.108	251.661
AT1G02900	162.182	0.862528	1.08632	0.793989	0.427202	0.917323	29.9474	230.753	84.7336	53.8009	457.782	116.076
AT1G02910	883.824	-0.151043	0.462723	-0.326422	0.744105	0.995744	906.59	912.297	970.676	1138.43	453.174	921.781
AT1G02920	550.092	-1.24929	1.04246	-1.19841	0.230757	0.802212	658.162	769.415	894.466	830.687	52.2302	95.5921
AT1G02930	1366.96	-0.180837	0.694026	-0.260563	0.794429	0.998906	1053.6	1738.15	1564.81	1788.34	1695.94	360.909
AT1G02940	0	NA	NA	NA	NA	NA	0	0	0	0	0	0
AT1G02950	0	NA	NA	NA	NA	NA	0	0	0	0	0	0
AT1G02952	0	NA	NA	NA	NA	NA	0	0	0	0	0	0
AT1G02960	240.517	-1.64098	1.76379	-0.930371	0.352179	0.866858	358.688	355.06	379.546	6.45611	0	343.351
AT1G02965	0	NA	NA	NA	NA	NA	0	0	0	0	0	0
AT1G02970	10.6916	-0.194393	2.42028	-0.0803183	0.935984	0.99995	14.2931	15.7169	4.01106	30.1285	0	0
AT1G02980	0	NA	NA	NA	NA	NA	0	0	0	0	0	0
AT1G02990	74.8971	-0.312992	0.588878	-0.531506	0.595068	0.974782	66.0204	75.7271	107.797	60.2571	43.0131	96.5675
AT1G03000	419.97	0.944011	0.478403	1.97325	0.0484666	0.453959	375.023	278.618	208.575	393.823	781.917	481.862
AT1G03010	0.487715	3.17026	4.03428	0.78583	0.431967	NA	0	0	0	0	0	2.92629
AT1G03020	9.6467	2.96655	2.41911	1.22629	0.220088	0.796507	2.04187	0	4.51244	6.45611	0	44.8697
AT1G03022	0	NA	NA	NA	NA	NA	0	0	0	0	0	0
AT1G03030	333.926	0.229192	1.62147	0.141349	0.887595	0.99995	228.689	312.196	381.552	0	920.173	160.946
AT1G03040	328.55	-1.0645	1.51167	-0.704187	0.481316	0.943801	552.666	360.775	420.158	331.414	0	306.285
AT1G03050	8.50779	-5.9679	3.91006	-1.52629	NA	NA	51.0467	0	0	0	0	0
AT1G03055	132.013	0.358537	1.5379	0.233134	0.815657	0.99995	129.999	126.45	90.7502	167.859	0	277.022
AT1G03060	114.655	-0.77517	0.893477	-0.867588	0.38562	0.890413	168.114	167.171	97.7696	180.771	50.694	23.4103
AT1G03070	6.00963	-5.46837	2.53016	-2.16127	0.0306743	0.352051	12.9318	3.57203	19.5539	0	0	0
AT1G03080	407.645	1.13637	0.715407	1.58842	0.112191	0.667276	285.862	250.042	229.132	182.923	1049.21	448.697
AT1G03090	1431.28	0.280653	0.455541	0.616087	0.537837	0.961356	1304.75	1568.84	1004.27	1134.12	2324.24	1251.48
AT1G03100	57.5281	0.561658	1.66785	0.336756	0.736301	0.995744	98.0097	20.0034	21.5594	60.2571	0	145.339
AT1G03103	1.08633	-3.00744	3.93235	-0.764794	0.444394	NA	0	0	6.51797	0	0	0
AT1G03106	1.10385	-1.84967	3.93285	-0.470314	0.638131	NA	1.36125	4.28644	0	0	0	0.975429
AT1G03110	105.097	-1.03327	0.966986	-1.06855	0.285274	0.829298	107.538	146.453	168.464	161.403	18.4342	28.2875
AT1G03120	66.4563	-2.49643	1.9697	-1.26741	0.205007	0.791655	138.847	145.739	54.6507	0	0	59.5012
AT1G03130	24453.6	0.060939	0.372667	0.163521	0.870108	0.99995	24466.4	22742.4	24601.3	35076.1	18732.2	21103.4
AT1G03140	412.098	0.0898898	1.60362	0.0560543	0.955299	0.99995	516.593	372.206	308.852	845.751	0	429.189
AT1G03150	614.782	0.938932	0.556732	1.68651	0.0916981	0.612947	358.688	381.493	524.947	359.39	1029.24	1034.93
AT1G03160	630.962	0.000699497	0.529975	0.00131987	0.998947	0.99995	865.072	593.672	433.696	794.102	347.177	752.056
AT1G03170	7.51243	0.773993	2.39425	0.323271	0.74649	0.995851	7.48685	4.28644	5.01382	0	0	28.2875
AT1G03180	107.735	1.12785	1.10763	1.01826	0.308556	0.836623	113.664	21.4322	67.6866	120.514	302.628	20.484
AT1G03190	63.097	-0.803984	2.16089	-0.372062	0.709846	0.992167	111.622	84.2999	45.1244	0	0	137.536
AT1G03200	0.162572	2.17884	4.0769	0.534437	0.593039	NA	0	0	0	0	0	0.975429
AT1G03210	168.442	-0.384551	0.672459	-0.571859	0.567418	0.967507	135.444	230.753	206.57	152.795	56.8387	228.25
AT1G03220	4584.89	-1.36597	0.378471	-3.60919	0.000307151	0.0139093	4269.55	8239.25	7310.66	2580.29	2755.91	2353.71
AT1G03230	280.176	-0.28115	0.642308	-0.437719	0.66159	0.98703	168.114	420.785	332.417	320.654	321.062	118.027
AT1G03240	0	NA	NA	NA	NA	NA	0	0	0	0	0	0
AT1G03250	353.836	-0.226291	0.252556	-0.896005	0.37025	0.878525	399.526	365.776	380.048	316.35	307.236	354.081
AT1G03260	125.089	-0.747453	1.53605	-0.486608	0.626536	0.98063	140.889	135.023	194.035	225.964	0	54.624
AT1G03270	28.7289	-1.84612	2.04211	-0.904024	0.365983	0.876211	74.8685	32.8627	27.576	0	0	37.0663
AT1G03280	382.419	0.931975	0.801088	1.16339	0.244673	0.811222	358.008	177.173	253.198	1045.89	181.269	278.973
AT1G03290	284.762	0.891317	0.291127	3.06161	0.00220152	0.0588326	230.051	173.601	195.038	359.39	367.147	383.344
AT1G03300	79.9977	1.62975	1.52268	1.07032	0.284477	0.828694	28.5862	52.1517	36.6009	0	221.21	141.437
AT1G03310	145.061	-1.2195	1.45932	-0.835664	0.403344	0.903328	278.375	147.168	183.506	103.298	0	158.02
AT1G03320	3.4932	-4.68273	3.9148	-1.19616	0.231634	0.802851	9.52872	11.4305	0	0	0	0
AT1G03330	329.752	0.574152	0.596251	0.962938	0.335579	0.850605	334.867	173.601	287.292	182.923	451.637	548.191
AT1G03340	60.9388	1.33759	1.56778	0.853172	0.393564	0.896452	23.1412	34.2915	46.1272	163.555	0	98.5184
AT1G03350	304.032	-1.30671	1.51492	-0.862556	0.388382	0.892704	396.803	487.939	414.643	146.339	0	378.467
AT1G03360	39.9042	-8.19846	1.79397	-4.57001	4.88e-06	0.000488081	114.345	19.289	105.792	0	0	0
AT1G03365	212.889	0.361365	1.51946	0.237825	0.812017	0.999394	238.899	185.031	135.373	0	433.203	284.825
AT1G03370	617.897	0.595506	0.548298	1.0861	0.277435	0.825377	325.338	610.103	541.994	404.583	725.078	1100.28
AT1G03380	362.506	-0.103922	0.405538	-0.256257	0.797753	0.998906	479.159	337.914	310.857	253.94	382.509	410.656
AT1G03390	0.952542	-2.80337	3.93622	-0.712199	0.476342	NA	0	5.71525	0	0	0	0
AT1G03400	591.18	-0.506168	1.58551	-0.319246	0.74954	0.996427	705.125	679.4	696.922	809.166	0	656.464
AT1G03410	252.91	0.58475	0.880455	0.664145	0.506597	0.952559	304.919	160.027	142.393	66.7132	608.328	235.078
AT1G03420.1	0	NA	NA	NA	NA	NA	0	0	0	0	0	0
AT1G03430	311.364	-0.119854	0.895996	-0.133766	0.893587	0.99995	251.83	302.908	418.654	40.8887	500.795	353.105
AT1G03440	110.716	-1.48827	0.859621	-1.73131	0.0833972	0.590477	185.129	131.451	173.478	68.8652	10.7533	94.6166
AT1G03445	2.5294	-4.21672	3.91785	-1.07628	0.281801	0.82868	10.89	4.28644	0	0	0	0
AT1G03457	52.1846	-1.32391	1.39365	-0.949957	0.342134	0.858917	62.6173	60.7245	100.276	49.4969	0	39.9926
AT1G03470	35.5168	1.05298	1.54582	0.681177	0.495759	0.949944	21.7799	20.0034	27.576	55.953	0	87.7886
AT1G03475	973.51	0.0248926	0.517102	0.0481387	0.961606	0.99995	1066.54	905.867	922.042	1508.58	497.723	940.314
AT1G03490	0.167127	-0.355298	4.06297	-0.087448	0.930315	NA	0	0	1.00276	0	0	0
AT1G03495	21.0558	-2.45636	1.37101	-1.79164	0.0731903	0.550731	30.628	32.1483	44.623	4.30408	0	14.6314
AT1G03502	0.162572	2.17884	4.0769	0.534437	0.593039	NA	0	0	0	0	0	0.975429
AT1G03506	19.1402	3.44583	2.36507	1.45697	0.145125	0.72949	6.12561	3.57203	0	0	98.3156	6.82801
AT1G03510	9.38023	2.39978	3.31352	0.724237	0.46892	0.937879	0	6.42966	2.50691	47.3448	0	0
AT1G03515	0	NA	NA	NA	NA	NA	0	0	0	0	0	0
AT1G03520	357.68	-0.268444	0.762541	-0.352039	0.724809	0.994287	257.275	415.07	501.382	101.146	259.615	611.594
AT1G03530	27.5529	-0.235937	1.50674	-0.156587	0.87557	0.99995	18.3768	38.5779	32.5899	27.9765	0	47.796
AT1G03540	0.113437	0.279992	4.08047	0.0686175	0.945294	NA	0.680623	0	0	0	0	0
AT1G03545	0.167127	-0.355298	4.06297	-0.087448	0.930315	NA	0	0	1.00276	0	0	0
AT1G03550	52.4538	-0.476125	1.22092	-0.389971	0.696558	0.991112	78.2716	51.4372	54.1493	4.30408	15.3618	111.199
AT1G03560	129.138	-0.0567563	1.52181	-0.0372951	0.97025	0.99995	106.858	186.46	101.781	170.011	0	209.717
AT1G03570	0	NA	NA	NA	NA	NA	0	0	0	0	0	0
AT1G03580	108.569	0.814822	1.06177	0.767418	0.442833	0.923307	88.481	85.7287	62.1714	10.7602	265.759	138.511
AT1G03590	289.587	-0.295274	1.5473	-0.190831	0.848658	0.99995	369.578	308.623	279.27	309.893	0	470.157
AT1G03600	4458.24	-0.314675	0.615886	-0.510931	0.609399	0.976652	5654.62	4263.58	4908.03	7278.19	1868	2777.05
AT1G03610	2891.91	-0.194296	0.238919	-0.81323	0.416086	0.911102	3128.82	3312.7	2819.27	2511.43	2519.34	3059.92
AT1G03620	72.465	2.65072	1.27574	2.07778	0.0377296	0.393127	36.073	19.289	4.51244	10.7602	273.44	90.7149
AT1G03630	4138.4	0.0659965	0.463191	0.142482	0.886699	0.99995	4480.54	3742.77	3906.27	6451.81	3691.45	2557.58
AT1G03640	0.113437	0.279992	4.08047	0.0686175	0.945294	NA	0.680623	0	0	0	0	0
AT1G03650	5.15795	-5.24651	3.9122	-1.34106	0.1799	0.768392	20.4187	0	10.529	0	0	0
AT1G03660	0	NA	NA	NA	NA	NA	0	0	0	0	0	0
AT1G03670	0	NA	NA	NA	NA	NA	0	0	0	0	0	0
AT1G03680	7755.21	-0.104853	0.710079	-0.147663	0.882609	0.99995	8829.72	7296.94	7983.01	14648.9	2440.99	5331.7
AT1G03687	148.685	-0.12153	1.52575	-0.0796527	0.936513	0.99995	159.266	175.03	130.359	284.069	0	143.388
AT1G03700	0	NA	NA	NA	NA	NA	0	0	0	0	0	0
AT1G03710	2.35018	-4.11465	3.91866	-1.05001	0.293712	0.831729	0	3.57203	10.529	0	0	0
AT1G03720	0	NA	NA	NA	NA	NA	0	0	0	0	0	0
AT1G03730	441.088	-1.16168	0.395989	-2.93362	0.00335039	0.0804093	566.278	731.552	532.969	230.268	219.674	365.786
AT1G03740	505.091	-0.922431	0.762752	-1.20935	0.22653	0.800999	435.599	878.005	671.351	83.9295	459.318	502.346
AT1G03743	1.48422	-3.44634	3.80004	-0.906923	0.364448	NA	3.40311	5.00084	0.501382	0	0	0
AT1G03746	4.49769	-5.04789	2.60213	-1.93991	0.0523909	0.471094	13.6125	7.85847	5.51521	0	0	0
AT1G03750	36.2519	-0.662899	2.15818	-0.307157	0.758724	0.996633	29.2668	55.7237	48.6341	0	0	83.8869
AT1G03760	16.123	1.15139	2.20321	0.522596	0.601255	0.975369	20.4187	9.28728	0.501382	2.15204	0	64.3783
AT1G03770	13.6492	0.742363	1.84436	0.402504	0.687313	0.991112	1.36125	13.5737	15.5429	38.7367	0	12.6806
AT1G03780	5.33747	-0.336832	2.56904	-0.131112	0.895687	0.99995	12.2512	5.71525	0	4.30408	0	9.75429
AT1G03790	0	NA	NA	NA	NA	NA	0	0	0	0	0	0
AT1G03800	53.8809	3.01461	2.33453	1.29131	0.196596	0.785069	0	20.0034	15.5429	271.157	0	16.5823
AT1G03810	0	NA	NA	NA	NA	NA	0	0	0	0	0	0
AT1G03820	6.81656	3.75297	3.79782	0.98819	0.323059	0.839966	0	2.85762	0	0	0	38.0417
AT1G03830	3.56164	-4.71114	3.91464	-1.20347	0.228796	0.802098	0	17.8602	3.50968	0	0	0
AT1G03840	0	NA	NA	NA	NA	NA	0	0	0	0	0	0
AT1G03850	359.737	-0.439043	1.59466	-0.275321	0.78307	0.998184	329.422	443.646	468.793	705.868	0	210.693
AT1G03860	553.684	-0.515943	0.409466	-1.26004	0.207656	0.793906	795.648	606.531	551.521	619.787	337.96	410.656
AT1G03870	1638.18	0.168248	0.486889	0.345556	0.729676	0.994843	1046.8	1489.54	2091.27	1676.44	2396.44	1128.57
AT1G03880	0	NA	NA	NA	NA	NA	0	0	0	0	0	0
AT1G03890	0.650286	3.5556	4.00663	0.887429	0.374848	NA	0	0	0	0	0	3.90172
AT1G03900	397.106	0.0564273	0.242772	0.232429	0.816205	0.99995	402.929	361.49	404.114	385.215	405.552	423.336
AT1G03905	110.707	-0.1717	1.60531	-0.106958	0.914823	0.99995	117.748	88.5864	145.401	77.4734	235.036	0
AT1G03910	455.722	0.653314	0.675438	0.967245	0.333422	0.849404	415.861	345.058	301.331	660.676	838.755	172.651
AT1G03920	9.30748	-6.09753	3.90978	-1.55956	NA	NA	55.1305	0.714406	0	0	0	0
AT1G03930	469.279	-0.307203	0.331529	-0.926625	0.354121	0.868468	454.656	553.665	550.518	329.262	419.378	508.199
AT1G03935	8.67379	-1.3069	2.18398	-0.598403	0.549571	0.965074	10.89	20.0034	6.51797	0	0	14.6314
AT1G03940	27.0454	2.20531	2.41851	0.911845	0.36185	0.873573	12.2512	8.57287	8.02212	133.426	0	0
AT1G03950	194.668	0.705627	0.67377	1.04728	0.29497	0.832504	112.983	115.734	215.594	96.8417	351.786	275.071
AT1G03960	120.016	-0.0299408	1.54307	-0.0194033	0.984519	0.99995	68.0623	114.305	181.5	137.73	0	218.496
AT1G03970	10.4483	-0.374458	1.73309	-0.216063	0.828938	0.99995	2.72249	19.289	13.5373	8.60815	0	18.5332
AT1G03980	17.1643	-2.54565	2.12655	-1.19708	0.231275	0.802425	63.2979	5.00084	20.0553	0	0	14.6314
AT1G03982	1.14711	1.302	3.89311	0.334438	0.738049	NA	0	0	2.00553	0	0	4.87715
AT1G03990	20.0185	1.28097	1.78944	0.71585	0.474084	0.940597	18.3768	6.42966	10.0276	77.4734	0	7.80343
AT1G04000	356.655	1.11923	0.552153	2.02703	0.042659	0.423323	289.945	267.188	117.323	555.226	588.358	321.892
AT1G04010	21.0696	-3.21104	1.7801	-1.80385	0.0712551	0.545617	31.9893	57.1525	25.5705	0	0	11.7052
AT1G04020	31.2786	-1.22302	1.80608	-0.677169	0.498299	0.950706	29.9474	82.8711	19.0525	2.15204	0	53.6486
AT1G04030	13.146	-2.0477	2.0717	-0.988414	0.32295	0.839966	14.2931	22.1466	27.0746	0	15.3618	0
AT1G04040	436.786	-0.180694	1.63103	-0.110785	0.911787	0.99995	234.815	526.517	630.739	893.096	0	335.548
AT1G04050	34.236	-1.02645	2.16252	-0.474653	0.635034	0.982594	17.6962	50.7228	69.6922	0	0	67.3046
AT1G04070	69.443	-0.0734816	1.58118	-0.0464727	0.962934	0.99995	74.8685	70.7262	67.6866	172.163	0	31.2137
AT1G04080	1099.18	-0.109225	0.226476	-0.482279	0.629608	0.98063	1138	1084.47	1200.81	1020.07	983.156	1168.56
AT1G04090	3.91276	-4.84841	2.65976	-1.82287	0.0683228	0.53544	6.80623	7.14406	9.52627	0	0	0
AT1G04100	117.542	0.317176	0.605233	0.524057	0.600239	0.975369	155.182	83.5855	75.7087	79.6254	184.342	126.806
AT1G04110	0.167127	-0.355298	4.06297	-0.087448	0.930315	NA	0	0	1.00276	0	0	0
AT1G04120	138.448	0.806054	0.548765	1.46885	0.141873	0.725421	127.957	62.8677	111.808	111.906	218.138	198.012
AT1G04130	102.091	-0.871564	1.45664	-0.598339	0.549614	0.965074	92.5647	172.172	131.362	103.298	0	113.15
AT1G04140	695.96	0.21446	0.577444	0.371396	0.710342	0.992167	752.769	688.688	490.853	1194.38	348.713	700.358
AT1G04150	0	NA	NA	NA	NA	NA	0	0	0	0	0	0
AT1G04160	38.1732	-5.04072	1.37146	-3.67544	0.000237442	0.0114798	80.3135	90.7296	52.1438	0	0	5.85258
AT1G04170	371.834	0.575716	0.738102	0.779996	0.435393	0.920835	309.003	264.33	321.888	555.226	671.311	109.248
AT1G04171	0.167127	-0.355298	4.06297	-0.087448	0.930315	NA	0	0	1.00276	0	0	0
AT1G04180	0	NA	NA	NA	NA	NA	0	0	0	0	0	0
AT1G04190	217.213	-0.0424225	0.824973	-0.0514228	0.958989	0.99995	221.202	151.454	288.295	144.187	434.739	63.4029
AT1G04200	398.863	1.28194	0.881622	1.45407	0.145927	0.730948	182.407	285.048	230.135	101.146	1161.35	433.091
AT1G04210	251.307	-0.886332	0.751045	-1.18013	0.237948	0.806602	246.386	315.768	417.652	92.5376	81.4176	354.081
AT1G04220	62.6968	-1.40576	1.62368	-0.865784	0.386609	0.891607	116.387	62.8677	93.2571	96.8417	0	6.82801
AT1G04230	200.398	1.23783	0.719192	1.72113	0.0852269	0.597502	114.345	142.167	101.781	103.298	522.302	218.496
AT1G04240	675.981	-0.305956	0.588204	-0.520154	0.602956	0.975369	425.389	692.974	1124.6	473.448	414.769	924.707
AT1G04250	1274.46	0.0251614	0.447682	0.0562038	0.955179	0.99995	1408.89	842.999	1536.74	1758.21	1124.49	975.429
AT1G04260	163.7	-0.24712	1.53184	-0.161322	0.87184	0.99995	116.387	197.891	218.603	288.373	0	160.946
AT1G04270	959.488	0.0351134	0.920568	0.0381432	0.969574	0.99995	1085.59	925.156	832.295	1805.56	107.533	1000.79
AT1G04280	651.866	-0.906194	0.770629	-1.17591	0.239629	0.808921	1045.44	705.119	800.206	520.793	98.3156	741.326
AT1G04290	44.6147	2.31771	0.936444	2.47501	0.0133233	0.21165	18.3768	9.28728	17.047	27.9765	152.082	42.9189
AT1G04295	0	NA	NA	NA	NA	NA	0	0	0	0	0	0
AT1G04300	472.684	0.150428	0.477972	0.314722	0.752973	0.996427	609.158	403.64	331.915	348.63	688.209	454.55
AT1G04310	8.93855	-0.0750861	2.34805	-0.031978	0.97449	0.99995	7.48685	10.0017	10.0276	0	26.1151	0
AT1G04320	0	NA	NA	NA	NA	NA	0	0	0	0	0	0
AT1G04330	2.276	5.32535	3.93651	1.35281	0.176116	0.763943	0	0	0	0	0	13.656
AT1G04340	152.473	-0.504662	1.48753	-0.339263	0.734412	0.99548	193.297	182.888	160.442	185.075	0	193.135
AT1G04350	1260.21	-0.405936	0.501417	-0.809577	0.418184	0.912998	2046.63	980.88	1281.03	1424.65	678.992	1149.06
AT1G04360	87.9751	-0.783023	1.56191	-0.501325	0.616143	0.978186	61.9367	157.884	113.814	66.7132	127.503	0
AT1G04370	0	NA	NA	NA	NA	NA	0	0	0	0	0	0
AT1G04380	0	NA	NA	NA	NA	NA	0	0	0	0	0	0
AT1G04390	80.2616	0.215279	2.24517	0.0958856	NA	NA	52.408	115.019	55.6534	0	0	258.489
AT1G04400	1069.65	0.515386	0.415569	1.2402	0.214903	0.795962	903.867	828.711	908.004	1515.03	1513.14	749.13
AT1G04410	6442.44	0.293212	0.396184	0.740091	0.459245	0.932844	5938.44	5921.71	5508.19	10080.1	6369.01	4837.15
AT1G04420	1956.55	-0.289395	0.303462	-0.953643	0.340265	0.856518	2549.61	1878.17	2027.09	2025.07	1805.01	1454.37
AT1G04425	0	NA	NA	NA	NA	NA	0	0	0	0	0	0
AT1G04430	1175.56	-0.310241	0.360351	-0.860942	0.38927	0.893163	993.029	1497.4	1415.4	871.575	960.114	1315.85
AT1G04440	1213.59	0.130879	0.4537	0.288471	0.772986	0.997537	920.202	1344.51	1212.34	733.845	1445.55	1625.07
AT1G04445	19.2467	-4.32475	1.69783	-2.54723	0.0108583	0.18374	14.2931	65.7254	30.5843	0	0	4.87715
AT1G04450	0.567186	-2.05556	3.95608	-0.519596	0.603345	NA	3.40311	0	0	0	0	0
AT1G04457	0	NA	NA	NA	NA	NA	0	0	0	0	0	0
AT1G04470	0	NA	NA	NA	NA	NA	0	0	0	0	0	0
AT1G04480	665.804	0.214282	0.503705	0.425412	0.670536	0.989133	686.068	688.688	473.806	1080.32	416.305	649.636
AT1G04490	21.9654	1.35057	1.7653	0.765062	0.444235	0.923439	14.2931	2.14322	20.5567	64.5611	0	30.2383
AT1G04500	9.72915	7.40375	3.91384	1.89169	0.058533	0.500896	0	0	0	0	58.3749	0
AT1G04501	0	NA	NA	NA	NA	NA	0	0	0	0	0	0
AT1G04510	208.317	-0.375931	1.55951	-0.241057	0.809511	0.999308	215.757	223.609	266.234	417.495	0	126.806
AT1G04520	92.5711	1.08144	0.78177	1.38332	0.166568	0.756049	58.5336	36.4347	83.2295	60.2571	235.036	81.9361
AT1G04530	1446.23	-0.358499	0.362152	-0.989912	0.322217	0.839743	1800.93	1364.52	1708.21	1652.76	946.288	1204.66
AT1G04540	3.25507	-4.58079	3.91538	-1.16995	0.242022	0.810168	9.52872	10.0017	0	0	0	0
AT1G04550	144.671	-0.475206	1.51577	-0.313508	0.753895	0.996427	187.171	97.1592	220.608	148.491	0	214.594
AT1G04555	131.814	0.383872	0.592059	0.648368	0.516747	0.95617	77.591	135.737	130.359	77.4734	205.848	163.872
AT1G04560	0	NA	NA	NA	NA	NA	0	0	0	0	0	0
AT1G04570	0.975429	4.12398	3.97459	1.03759	0.299462	NA	0	0	0	0	0	5.85258
AT1G04580	0.113437	0.279992	4.08047	0.0686175	0.945294	NA	0.680623	0	0	0	0	0
AT1G04590	195.428	0.0132892	0.838072	0.0158569	0.987349	0.99995	214.396	223.609	144.9	288.373	264.223	37.0663
AT1G04600	1.36125	-3.32198	3.92735	-0.845857	0.397632	NA	8.16748	0	0	0	0	0
AT1G04610	36.7559	-2.3772	2.0353	-1.16799	0.242812	0.810466	42.1986	122.163	21.0581	0	0	35.1155
AT1G04620	57.5368	-1.10505	1.949	-0.566982	0.570726	0.968451	192.616	3.57203	39.1078	101.146	0	8.77886
AT1G04625	0	NA	NA	NA	NA	NA	0	0	0	0	0	0
AT1G04630	435.526	-0.215903	0.678044	-0.318421	0.750166	0.996427	427.431	506.514	469.294	725.237	141.329	343.351
AT1G04635	5.72816	-5.39691	3.91166	-1.3797	0.16768	0.75691	27.2249	7.14406	0	0	0	0
AT1G04640	415.046	1.04878	0.469901	2.23192	0.0256203	0.318124	234.815	199.319	377.04	639.155	382.509	657.439
AT1G04645	5.10467	-5.23067	3.91226	-1.337	0.181224	0.768677	30.628	0	0	0	0	0
AT1G04650	11.2159	0.737849	2.44119	0.30225	0.762461	0.996746	8.16748	2.14322	15.0415	0	0	41.9435
AT1G04660	32.1379	-1.29063	2.18643	-0.590294	0.554993	0.965643	10.2093	72.8694	54.1493	0	0	55.5995
AT1G04670	0	NA	NA	NA	NA	NA	0	0	0	0	0	0
AT1G04680	671.215	-1.05022	0.333248	-3.15147	0.00162452	0.0474942	713.293	1073.04	928.059	510.033	422.45	380.417
AT1G04684	0	NA	NA	NA	NA	NA	0	0	0	0	0	0
AT1G04690	935.926	-0.18309	0.657695	-0.278382	0.780719	0.998062	838.528	973.736	1172.73	1446.17	291.875	892.518
AT1G04700	5.99754	-5.4643	3.91144	-1.39701	0.162412	0.751016	0	16.4313	19.5539	0	0	0
AT1G04710	243.318	0.311586	0.499346	0.623989	0.532635	0.960861	221.883	250.042	178.492	413.191	190.487	205.816
AT1G04720	0	NA	NA	NA	NA	NA	0	0	0	0	0	0
AT1G04730	13.7347	-6.65972	1.91702	-3.474	0.00051277	0.0201792	35.3924	16.4313	30.5843	0	0	0
AT1G04750	1011.18	0.0158698	0.447426	0.035469	0.971706	0.99995	1000.52	985.881	1028.84	1560.23	732.759	758.884
AT1G04760	23.3203	-3.79639	1.77898	-2.13403	0.0328406	0.36595	78.9523	37.1491	15.0415	0	0	8.77886
AT1G04770	909.832	-0.452158	0.878017	-0.514976	0.606569	0.975507	1269.36	1151.62	734.024	165.707	443.957	1694.32
AT1G04778	0.232505	-0.756462	4.02685	-0.187855	0.850991	NA	0.680623	0.714406	0	0	0	0
AT1G04780	481.932	0.348739	0.471929	0.738964	0.459929	0.93316	600.309	342.915	328.405	525.097	706.644	388.221
AT1G04790	332.863	1.19864	0.430291	2.78565	0.00534198	0.112081	165.391	180.03	259.716	550.922	519.229	321.892
AT1G04800	4.29722	-4.98366	2.78613	-1.78874	0.0736571	0.551709	13.6125	2.14322	10.0276	0	0	0
AT1G04810	309.773	-0.860304	1.51862	-0.566502	0.571052	0.968577	428.112	439.36	330.912	374.455	0	285.801
AT1G04820	2389.21	-0.21501	0.648559	-0.33152	0.740252	0.995744	2313.44	2713.31	2672.87	4050.13	843.364	1742.12
AT1G04830	325.337	-0.204243	0.320551	-0.637161	0.52402	0.958668	409.735	317.911	316.372	352.934	278.049	277.022
AT1G04840	7.5477	-2.90835	1.98383	-1.46602	0.142642	0.725898	22.4606	11.4305	6.51797	0	0	4.87715
AT1G04850	993.595	0.252329	0.42257	0.59713	0.550421	0.965074	982.139	800.135	937.585	1497.82	683.601	1060.29
AT1G04860	395.328	1.94004	0.754091	2.57269	0.0100911	0.175944	190.574	156.455	143.395	281.917	1301.15	298.481
AT1G04870	93.0669	-1.47214	1.41974	-1.03691	0.299778	0.833712	153.14	134.308	123.34	45.1928	0	102.42
AT1G04880	0	NA	NA	NA	NA	NA	0	0	0	0	0	0
AT1G04890	0	NA	NA	NA	NA	NA	0	0	0	0	0	0
AT1G04900	20.9035	-1.56836	2.0671	-0.758723	0.448018	0.925346	47.6436	25.0042	21.5594	0	0	31.2137
AT1G04910	199.473	-0.627801	1.50892	-0.416059	0.677367	0.990193	289.945	230.753	206.068	176.467	0	293.604
AT1G04920	2.02848	-3.90322	3.92054	-0.995583	0.319453	0.839139	0	2.14322	10.0276	0	0	0
AT1G04930	21.4596	-1.02338	1.52556	-0.670823	0.502333	0.951669	38.1149	36.4347	12.0332	12.9122	0	29.2629
AT1G04940	149.164	0.943123	0.490081	1.92442	0.0543014	0.482198	120.47	90.7296	95.2627	135.578	284.194	168.749
AT1G04945	44.3791	1.7012	1.65285	1.02925	0.303362	0.833832	19.0574	35.0059	8.5235	144.187	0	59.5012
AT1G04950	279.266	0.39742	0.528351	0.75219	0.451937	0.927862	178.323	333.628	211.583	208.748	462.391	280.924
AT1G04960	778.291	0.117745	0.309543	0.380383	0.703661	0.991112	707.848	814.423	716.977	946.897	625.226	858.378
AT1G04970	528.214	-0.0112241	0.453478	-0.0247511	0.980253	0.99995	443.766	483.653	664.332	318.502	651.341	607.692
AT1G04980	77.0638	-2.10809	1.30302	-1.61785	0.105696	0.649582	72.8267	177.887	125.346	0	30.7236	55.5995
AT1G04985	644.864	0.00631617	0.461105	0.0136979	0.989071	0.99995	673.136	597.244	659.819	811.318	350.249	777.417
AT1G04990	314.892	-0.968577	1.55964	-0.621026	0.534583	0.960992	337.589	500.799	411.635	494.969	0	144.364
AT1G05000	43.9942	-0.901627	2.12293	-0.424708	NA	NA	53.0886	55.0093	64.1769	0	0	91.6904
AT1G05010	876.446	0.338011	0.361621	0.93471	0.349938	0.864452	560.833	956.59	805.722	970.569	840.291	1124.67
AT1G05020	71.7548	0.333571	1.57824	0.211356	0.83261	0.99995	46.963	78.5847	64.6783	191.531	0	48.7715
AT1G05030	128.759	1.31773	1.60375	0.821657	0.411272	0.908603	86.4391	77.1559	57.659	0	465.463	85.8378
AT1G05040	7.14543	2.19238	3.34989	0.654463	0.512814	0.954492	2.04187	5.71525	0	0	0	35.1155
AT1G05055	104.735	-0.881035	1.49689	-0.588578	0.556144	0.965643	61.2561	203.606	142.393	111.906	0	109.248
AT1G05060	226.793	-0.0672869	0.489839	-0.137365	0.890742	0.99995	197.381	228.61	268.741	333.566	181.269	151.192
AT1G05061	0	NA	NA	NA	NA	NA	0	0	0	0	0	0
AT1G05065	15.0846	0.547192	1.85667	0.294716	0.76821	0.997252	2.04187	11.4305	23.0636	45.1928	0	8.77886
AT1G05070	540.285	-0.488902	0.66713	-0.732845	0.463653	0.935492	765.02	437.217	689.401	826.382	202.776	320.916
AT1G05080	0	NA	NA	NA	NA	NA	0	0	0	0	0	0
AT1G05085	0	NA	NA	NA	NA	NA	0	0	0	0	0	0
AT1G05090	37.9789	0.543474	1.51251	0.359319	0.719357	0.992994	33.3505	30.7195	28.5788	79.6254	0	55.5995
AT1G05100	371.393	-0.284907	1.47709	-0.192884	0.84705	0.99995	204.187	380.779	639.263	154.947	1.53618	847.648
AT1G05120	119.782	0.284234	0.752993	0.377472	0.705823	0.991112	104.816	155.026	65.1797	66.7132	86.0262	240.931
AT1G05135	473.233	0.143507	0.451718	0.317692	0.750719	0.996427	284.5	563.666	501.382	492.817	382.509	614.52
AT1G05136	0	NA	NA	NA	NA	NA	0	0	0	0	0	0
AT1G05140	565.781	0.553228	0.599124	0.923394	0.355802	0.869777	513.87	417.213	443.723	1022.22	734.295	263.366
AT1G05150	147.475	-0.50819	1.48718	-0.341715	0.732566	0.995374	176.281	157.169	186.013	204.444	0	160.946
AT1G05160	111.21	-1.11885	1.44859	-0.77237	0.439895	0.922434	202.826	155.741	98.271	111.906	0	98.5184
AT1G05170	294.557	-1.84936	1.63331	-1.13228	0.257519	0.81487	636.382	353.631	394.087	0	18.4342	364.811
AT1G05180	256.433	0.174614	0.327193	0.533672	0.593568	0.97439	246.386	204.32	271.248	314.197	238.108	264.341
AT1G05190	4698.72	0.0534289	0.323947	0.164931	0.868998	0.99995	5444.98	4008.53	4380.08	5793.29	4805.18	3760.28
AT1G05200	519.9	0.496537	0.703498	0.705811	0.480306	0.943535	564.236	390.066	339.937	232.42	1145.99	446.747
AT1G05205	151.993	-0.612168	0.726697	-0.842398	0.399565	0.900574	288.584	121.449	140.387	165.707	149.01	46.8206
AT1G05210	31.2234	-0.155717	1.81458	-0.0858141	0.931614	0.99995	31.9893	20.7178	45.6258	86.0815	0	2.92629
AT1G05220	2.63421	-4.27708	3.9174	-1.09182	0.274914	0.825214	0	9.28728	6.51797	0	0	0
AT1G05230	118.73	0.609342	0.661837	0.920683	0.357216	0.870466	64.6592	130.022	87.2405	118.362	235.036	77.0589
AT1G05240	1.44044	1.11698	3.85797	0.289526	0.772179	NA	1.36125	1.42881	0	0	0	5.85258
AT1G05250	0.453749	-1.73222	3.96835	-0.436509	0.662467	NA	2.72249	0	0	0	0	0
AT1G05260	1.00896	4.14513	3.97361	1.04316	0.296872	NA	0	0	0	2.15204	0	3.90172
AT1G05270	450.859	0.23472	0.229178	1.02418	0.30575	0.834687	396.123	414.356	432.693	464.84	497.723	499.42
AT1G05280	0	NA	NA	NA	NA	NA	0	0	0	0	0	0
AT1G05290	1.60692	0.0833706	3.84574	0.0216787	0.982704	NA	4.76436	0	0	0	0	4.87715
AT1G05291	0	NA	NA	NA	NA	NA	0	0	0	0	0	0
AT1G05300	21.3109	-1.58807	2.26449	-0.701295	0.483119	0.944812	6.80623	42.15	46.6286	32.2806	0	0
AT1G05310	73.9956	-1.73708	2.2611	-0.768244	0.442342	0.923307	163.35	0	177.991	75.3213	0	27.312
AT1G05320	107.996	-1.41539	1.43831	-0.984067	0.325083	0.841549	89.1616	172.172	210.079	73.1693	0	103.396
AT1G05330	63.1144	-2.51505	1.38111	-1.82103	0.0686016	0.536091	102.093	125.735	93.7585	47.3448	0	9.75429
AT1G05340	912.894	-0.57961	1.64511	-0.352322	0.724596	0.994287	597.587	1513.83	1170.23	908.16	0	1287.57
AT1G05350	532.196	-0.245852	1.07569	-0.228552	0.819217	0.99995	505.022	577.955	649.792	21.5204	823.393	615.496
AT1G05360	207.973	0.550992	0.646023	0.8529	0.393715	0.896452	130.68	179.316	196.041	172.163	440.884	128.757
AT1G05370	29.7357	-1.64006	2.05321	-0.798779	0.424419	0.916384	25.183	52.1517	58.1604	0	0	42.9189
AT1G05380	183.337	0.528096	0.551467	0.95762	0.338255	0.854107	142.25	176.458	132.866	111.906	216.602	319.941
AT1G05385	502.611	0.876185	0.388508	2.25525	0.0241174	0.306632	423.347	341.486	297.821	830.687	648.269	474.059
AT1G05390	0	NA	NA	NA	NA	NA	0	0	0	0	0	0
AT1G05400	2.04146	-3.91232	3.92045	-0.997927	0.318315	0.838898	2.72249	0	9.52627	0	0	0
AT1G05410	99.8139	-0.485367	1.48587	-0.326656	0.743928	0.995744	135.444	134.308	79.7198	101.146	0	148.265
AT1G05420	1.40629	-3.36787	3.92671	-0.857683	0.391067	NA	2.72249	5.71525	0	0	0	0
AT1G05430	306.645	-0.00634851	0.477434	-0.0132971	0.989391	0.99995	300.155	333.628	287.793	408.887	168.98	340.425
AT1G05440	0	NA	NA	NA	NA	NA	0	0	0	0	0	0
AT1G05450	0	NA	NA	NA	NA	NA	0	0	0	0	0	0
AT1G05460	86.6917	1.52237	1.51106	1.00748	NA	NA	49.0049	45.722	39.6092	4.30408	371.756	9.75429
AT1G05470	24.6458	-4.7103	1.79002	-2.63143	0.00850273	0.157293	8.16748	43.5788	91.2516	0	0	4.87715
AT1G05490	0	NA	NA	NA	NA	NA	0	0	0	0	0	0
AT1G05500	460.151	-0.344694	0.581333	-0.592937	0.553223	0.965643	476.436	678.686	390.076	208.748	652.877	354.081
AT1G05510	5.68274	-5.38714	3.9117	-1.37719	0.168454	0.757023	9.52872	0	24.5677	0	0	0
AT1G05520	103.76	-1.22931	0.909332	-1.35189	0.176412	0.764013	169.475	139.309	128.855	10.7602	52.2302	121.929
AT1G05530	0	NA	NA	NA	NA	NA	0	0	0	0	0	0
AT1G05540	21.7373	-7.32236	1.68715	-4.34008	1.42e-05	0.00117804	39.4761	34.2915	56.6562	0	0	0
AT1G05550	3.74565	-4.7861	3.91424	-1.22274	0.221428	0.796943	0	6.42966	16.0442	0	0	0
AT1G05560	88.5696	0.391471	0.555379	0.704872	0.48089	0.943728	93.2453	70.7262	66.6839	83.9295	67.592	149.241
AT1G05562	1.53618	4.7412	3.95121	1.19994	0.230164	NA	0	0	0	0	9.21709	0
AT1G05570	40.2189	1.03178	2.29085	0.45039	NA	NA	20.4187	17.8602	41.1134	0	0	161.921
AT1G05575	276.785	-1.32804	0.630337	-2.10687	0.0351286	0.379846	206.229	525.803	455.757	187.227	79.8815	205.816
AT1G05577	0.0835637	0.279992	4.08047	0.0686175	0.945294	NA	0	0	0.501382	0	0	0
AT1G05580	3.98719	-4.87399	3.9138	-1.24533	0.213009	0.795211	21.7799	2.14322	0	0	0	0
AT1G05590	116.524	0.445721	1.60514	0.277683	0.781255	0.998062	123.873	105.018	67.1852	0	353.322	49.7469
AT1G05600	56.9844	1.12249	1.65316	0.678994	0.497142	0.950222	28.5862	27.1474	51.6424	170.011	64.5196	0
AT1G05610	0.0835637	0.279992	4.08047	0.0686175	0.945294	NA	0	0	0.501382	0	0	0
AT1G05615	0	NA	NA	NA	NA	NA	0	0	0	0	0	0
AT1G05620	185.996	0.205557	1.1337	0.181315	0.85612	0.99995	162.669	172.886	183.005	8.60815	413.233	175.577
AT1G05630	163.298	-0.400332	0.907372	-0.441199	0.659069	0.986958	132.721	208.607	216.597	21.5204	255.006	145.339
AT1G05640	2.86455	-4.39581	3.43922	-1.27814	0.2012	0.788311	0.680623	15.0025	1.50415	0	0	0
AT1G05650	0	NA	NA	NA	NA	NA	0	0	0	0	0	0
AT1G05660	0.119068	0.279992	4.08047	0.0686175	0.945294	NA	0	0.714406	0	0	0	0
AT1G05670	123.217	-2.23888	1.71558	-1.30502	0.191885	0.779832	218.48	278.618	112.31	126.97	0	2.92629
AT1G05675	1197.49	-1.34932	0.442073	-3.05227	0.00227121	0.0601329	1700.88	1971.05	1486.1	819.926	818.785	388.221
AT1G05680	201.232	-2.32104	1.39502	-1.6638	0.096152	0.625269	457.379	198.605	349.965	109.754	0	91.6904
AT1G05690	83.4667	1.10831	1.63668	0.677166	0.498301	0.950706	16.335	65.011	77.2129	228.116	0	114.125
AT1G05700	1.07161	-2.97395	3.93295	-0.756164	0.449551	NA	0	6.42966	0	0	0	0
AT1G05710	95.9717	-0.768419	1.47383	-0.521376	0.602105	0.975369	95.9678	154.312	112.31	142.034	0	71.2063
AT1G05720	251.679	-1.08448	1.48432	-0.730622	0.46501	0.935737	379.107	308.623	338.433	241.028	0	242.882
AT1G05730	0	NA	NA	NA	NA	NA	0	0	0	0	0	0
AT1G05740	0	NA	NA	NA	NA	NA	0	0	0	0	0	0
AT1G05750	9.1135	-1.81242	2.04171	-0.887697	0.374704	0.881177	12.9318	15.0025	15.0415	0	0	11.7052
AT1G05760	0	NA	NA	NA	NA	NA	0	0	0	0	0	0
AT1G05770	0.501382	-1.90109	3.9616	-0.479878	0.631314	NA	0	0	3.00829	0	0	0
AT1G05780	177.029	1.14391	0.463923	2.46574	0.0136729	0.214986	125.915	82.1567	122.337	249.636	313.381	168.749
AT1G05785	206.62	-0.00815245	1.06187	-0.00767743	0.993874	0.99995	243.663	187.174	190.024	507.881	26.1151	84.8624
AT1G05790	258.439	0.77347	0.841743	0.918891	0.358152	0.871212	187.171	189.318	196.041	75.3213	677.456	225.324
AT1G05800	0	NA	NA	NA	NA	NA	0	0	0	0	0	0
AT1G05805	654.071	1.15973	0.806114	1.43866	0.150245	0.739261	336.908	450.076	426.676	204.444	1794.26	712.063
AT1G05810	133.508	1.00263	0.60191	1.66575	0.0957628	0.623318	43.5599	141.452	81.7253	176.467	192.023	165.823
AT1G05820	13.8505	-4.53088	1.74604	-2.59495	0.00946046	0.168022	10.89	45.722	23.565	0	0	2.92629
AT1G05830	420.119	0.112767	0.493461	0.228523	0.819239	0.99995	385.233	472.937	354.477	273.309	365.611	669.145
AT1G05835	52.2246	0.607715	2.35794	0.257731	0.796614	0.998906	17.0156	49.294	57.659	189.379	0	0
AT1G05840	311.884	0.0960006	0.359985	0.266679	0.789716	0.998906	272.93	371.491	260.719	269.005	384.045	313.113
AT1G05850	5075.73	-0.556656	0.357455	-1.55727	0.119405	0.677437	4826.98	6603.26	6696.96	5380.09	3345.8	3601.29
AT1G05860	169.202	-0.128938	1.61006	-0.080083	0.936171	0.99995	143.611	191.461	195.539	71.0172	0	413.582
AT1G05870	478.558	-0.290787	0.436345	-0.666415	0.505146	0.952071	586.016	365.776	628.734	408.887	321.062	560.872
AT1G05880	0	NA	NA	NA	NA	NA	0	0	0	0	0	0
AT1G05890	664.638	0.420925	0.452697	0.929815	0.352467	0.866858	535.65	552.236	617.202	555.226	1159.82	567.7
AT1G05894	13.0541	0.430886	3.153	0.136659	0.891301	0.99995	20.4187	0	13.0359	0	0	44.8697
AT1G05900	226.873	-1.14064	1.4847	-0.768259	0.442333	0.923307	370.94	291.478	274.256	159.251	0	265.317
AT1G05910	190.811	0.943863	0.706477	1.33601	0.181545	0.768705	95.2872	165.742	130.359	204.444	448.565	100.469
AT1G05920	1.02093	-2.90613	3.9342	-0.738682	0.4601	NA	6.12561	0	0	0	0	0
AT1G05925	0	NA	NA	NA	NA	NA	0	0	0	0	0	0
AT1G05930	4.73496	-5.12125	2.74408	-1.86629	0.0620007	0.514087	14.9737	11.4305	2.00553	0	0	0
AT1G05940	497.583	0.140756	0.431704	0.326049	0.744388	0.995744	489.368	472.937	456.759	559.53	692.818	314.088
AT1G05950	63.7006	1.37925	1.56892	0.879108	0.379343	0.885366	60.5754	30.7195	15.0415	0	109.069	166.798
AT1G05960	284.637	0.0881638	0.39182	0.225011	0.821971	0.99995	289.945	287.191	250.691	344.326	198.167	337.499
AT1G05970	245.597	0.354143	1.57532	0.224807	0.82213	0.99995	157.224	235.754	253.699	529.401	0	297.506
AT1G05980	0	NA	NA	NA	NA	NA	0	0	0	0	0	0
AT1G05990	0.79406	-2.54263	3.94202	-0.645006	0.518923	NA	4.76436	0	0	0	0	0
AT1G06000	75.4413	-1.27052	1.41719	-0.896506	0.369982	0.878348	93.2453	130.736	95.764	86.0815	0	46.8206
AT1G06002	0.46501	-1.76524	3.96697	-0.444984	0.656332	NA	1.36125	1.42881	0	0	0	0
AT1G06010	82.8105	1.34774	0.685207	1.96691	0.0491939	0.456498	61.2561	34.2915	44.623	75.3213	204.312	77.0589
AT1G06020	6.32481	-2.97247	2.0795	-1.42942	0.152884	0.740953	7.48685	5.00084	21.5594	0	0	3.90172
AT1G06030	24.7345	-0.155476	1.78942	-0.0868861	0.930762	0.99995	31.3087	40.7212	6.51797	6.45611	0	63.4029
AT1G06040	3746.12	-0.201546	0.423241	-0.476197	0.633934	0.982335	4135.47	3641.33	4244.2	4874.37	2132.22	3449.12
AT1G06050	90.0405	-2.77677	1.2922	-2.14887	0.0316446	0.357566	191.255	159.313	121.335	21.5204	0	46.8206
AT1G06060	338.069	-0.215198	0.540979	-0.397793	0.690783	0.991112	419.264	317.911	350.968	507.881	251.934	180.454
AT1G06070	244.718	-0.190108	0.829535	-0.229174	0.818734	0.99995	280.417	259.329	242.168	417.495	44.5493	224.349
AT1G06080	138.596	-0.502111	1.51146	-0.332202	0.739737	0.995744	147.015	143.596	196.542	241.028	0	103.396
AT1G06090	0	NA	NA	NA	NA	NA	0	0	0	0	0	0
AT1G06100	13.3055	1.65007	2.57104	0.641791	0.521009	0.956716	0.680623	7.14406	11.5318	0	0	60.4766
AT1G06110	706.371	0.0361979	0.821603	0.0440576	0.964858	0.99995	772.507	634.393	685.39	1144.88	118.286	882.764
AT1G06120	0.589708	-2.10878	3.9543	-0.533288	0.593834	NA	0.680623	2.85762	0	0	0	0
AT1G06130	982.224	-0.0817525	0.509764	-0.160373	0.872587	0.99995	887.532	1065.18	1078.97	479.904	969.331	1412.42
AT1G06135	22.3207	-0.445038	1.58692	-0.280441	0.779139	0.997537	28.5862	7.85847	40.612	34.4326	0	22.4349
AT1G06137	0	NA	NA	NA	NA	NA	0	0	0	0	0	0
AT1G06140	9.49194	0.591449	3.22571	0.183354	0.85452	0.99995	0	14.2881	8.5235	0	0	34.14
AT1G06148	5.30658	-1.52984	2.1821	-0.701084	0.483251	0.944973	21.0993	2.14322	0.501382	0	6.14473	1.95086
AT1G06149	0	NA	NA	NA	NA	NA	0	0	0	0	0	0
AT1G06150	26.3253	0.422143	2.4988	0.168938	0.865845	0.99995	9.52872	57.8669	0	81.7774	0	8.77886
AT1G06160	181.837	2.41401	2.39789	1.00672	NA	NA	32.6699	93.5872	46.1272	0	918.637	0
AT1G06170	0	NA	NA	NA	NA	NA	0	0	0	0	0	0
AT1G06180	59.0783	0.443878	1.77011	0.250763	NA	NA	40.1568	40.0067	69.6922	195.835	0	8.77886
AT1G06190	1044.11	0.0139172	0.638818	0.0217859	0.982619	0.99995	1091.04	1088.76	936.081	1994.94	592.966	560.872
AT1G06200	1044.64	0.0691072	0.645262	0.1071	0.91471	0.99995	975.333	1040.89	1041.87	1839.99	374.828	994.938
AT1G06210	286.531	-1.94362	1.4545	-1.33628	0.181459	0.768705	564.236	426.501	374.031	118.362	0	236.054
AT1G06220	496.317	0.196686	0.444742	0.442247	0.658311	0.986958	486.645	400.782	498.875	781.19	365.611	444.796
AT1G06225	0	NA	NA	NA	NA	NA	0	0	0	0	0	0
AT1G06230	451.106	1.0825	0.492706	2.19705	0.0280168	0.33281	349.16	269.331	250.19	352.934	890.986	594.036
AT1G06240	345.965	0.436132	0.938943	0.464492	0.642295	0.984026	411.096	272.903	198.547	55.953	798.815	338.474
AT1G06250	47.3194	-1.01501	2.13664	-0.47505	0.634751	0.98259	68.7429	34.2915	87.2405	0	0	93.6412
AT1G06260	0	NA	NA	NA	NA	NA	0	0	0	0	0	0
AT1G06265	47.3548	-0.798367	2.14224	-0.372678	NA	NA	46.2824	79.2991	55.1521	0	0	103.396
AT1G06270	8.09703	-5.89734	3.76709	-1.56549	0.117469	0.67429	0	20.0034	28.5788	0	0	0
AT1G06280	1.81499	-3.73763	3.92221	-0.95294	0.34062	NA	10.89	0	0	0	0	0
AT1G06290	168.958	-0.281494	0.552511	-0.509481	0.610415	0.976769	149.737	200.034	207.572	75.3213	178.197	202.889
AT1G06310	0	NA	NA	NA	NA	NA	0	0	0	0	0	0
AT1G06320	0.226874	-0.725537	4.0294	-0.180061	0.857105	NA	1.36125	0	0	0	0	0
AT1G06330	0	NA	NA	NA	NA	NA	0	0	0	0	0	0
AT1G06340	5.55586	-5.35404	2.52364	-2.12155	0.0338757	0.371748	17.0156	4.28644	12.0332	0	0	0
AT1G06350	0	NA	NA	NA	NA	NA	0	0	0	0	0	0
AT1G06360	99.819	-3.5728	1.91775	-1.86302	0.0624594	0.516161	44.9211	180.745	327.403	0	0	45.8452
AT1G06370	342.288	1.13798	0.655127	1.73704	0.0823802	0.587641	198.742	185.031	257.711	305.589	872.551	234.103
AT1G06380	50.6468	0.65605	1.7074	0.38424	0.700801	0.991112	17.0156	40.0067	60.6673	165.707	0	20.484
AT1G06390	1089.48	0.275686	0.267827	1.02934	0.303319	0.833832	924.286	1127.33	904.494	1327.81	1204.37	1048.59
AT1G06400	1170.57	-0.203126	0.398384	-0.509873	0.61014	0.976769	1296.59	1160.2	1303.09	966.265	761.946	1535.33
AT1G06410	2371.6	0.820345	0.449144	1.82646	0.0677803	0.534012	1365.33	2012.48	1767.37	1966.96	4405.77	2711.69
AT1G06420	129.407	1.59347	1.11891	1.42412	0.154411	0.744209	113.664	39.2923	40.612	114.058	23.0427	445.771
AT1G06430	1056.75	-0.497168	0.604024	-0.823093	0.410455	0.90811	1410.25	1150.19	1150.17	1327.81	325.671	976.405
AT1G06440	3.50552	-1.67239	3.45517	-0.484025	0.628368	0.98063	0	12.1449	4.01106	0	0	4.87715
AT1G06450	112.325	1.25011	1.29804	0.963078	0.335508	0.850605	26.5443	90.7296	82.2267	10.7602	417.841	45.8452
AT1G06460	1184	-0.160599	0.301924	-0.531918	0.594783	0.974782	1316.32	1160.2	1271.51	1388.06	912.492	1055.41
AT1G06470	202.936	-0.417084	1.2722	-0.327844	0.743029	0.995744	208.271	206.463	281.777	2.15204	328.743	190.209
AT1G06475	22.8672	1.06104	2.48667	0.426693	NA	NA	2.72249	5.71525	36.0995	0	0	92.6658
AT1G06480	0	NA	NA	NA	NA	NA	0	0	0	0	0	0
AT1G06490	6.11914	-5.49295	3.91135	-1.40436	0.160211	0.750598	25.183	0	11.5318	0	0	0
AT1G06500	116.756	0.00303923	1.53389	0.00198138	0.998419	0.99995	90.5229	90.7296	168.464	225.964	0	124.855
AT1G06510	456.622	0.866761	0.630581	1.37454	0.169273	0.757791	306.961	252.9	409.629	789.798	761.946	218.496
AT1G06515	580.71	-0.207462	0.40451	-0.512871	0.608041	0.976092	484.604	659.397	722.492	516.489	708.18	393.098
AT1G06520	79.0085	0.863921	1.92299	0.449258	0.653245	0.986052	26.5443	92.1584	49.6369	4.30408	0	301.408
AT1G06530	376.089	-0.391324	0.665536	-0.587984	0.556543	0.965643	368.217	403.64	509.906	144.187	225.819	604.766
AT1G06540	11.709	-0.153056	3.23737	-0.047278	0.962292	0.99995	0	5.00084	32.0885	0	0	33.1646
AT1G06550	218.7	-0.370133	0.363256	-1.01893	0.308235	0.836623	213.716	270.046	254.702	241.028	165.908	166.798
AT1G06560	98.0427	-0.118399	0.648446	-0.182589	0.85512	0.99995	53.7692	129.308	123.34	60.2571	136.72	84.8624
AT1G06570	1498.9	-0.571685	0.604005	-0.94649	0.343899	0.860466	1745.8	1798.16	1831.55	1863.66	439.348	1314.88
AT1G06580	49.5695	0.092232	1.96597	0.0469143	0.962581	0.99995	46.2824	45.722	51.6424	152.795	0	0.975429
AT1G06590	93.867	1.28171	1.15709	1.1077	0.26799	0.822148	49.0049	16.4313	98.7723	12.9122	231.963	154.118
AT1G06610	0	NA	NA	NA	NA	NA	0	0	0	0	0	0
AT1G06620	505.869	0.063091	0.67074	0.0940618	0.92506	0.99995	248.427	645.823	590.628	232.42	812.64	505.272
AT1G06630	583.121	0.223005	0.54392	0.409996	0.681809	0.990351	549.943	436.502	629.235	350.782	510.012	1022.25
AT1G06640	1660.72	-0.347515	0.516884	-0.672327	0.501376	0.951669	931.092	2343.25	2304.35	1857.21	1130.63	1397.79
AT1G06645	656.787	0.0577836	0.380375	0.151912	0.879256	0.99995	688.11	701.547	542.997	475.6	668.239	864.23
AT1G06650	1582.61	-0.376615	0.345785	-1.08916	0.276084	0.825214	1774.38	1873.17	1717.23	1037.28	1826.52	1267.08
AT1G06660	59.5845	2.63706	0.843704	3.12558	0.00177454	0.0502393	11.5706	12.1449	25.5705	77.4734	185.878	44.8697
AT1G06670	249.652	0.601889	0.561283	1.07234	0.283565	0.82868	249.108	152.169	194.536	146.339	354.858	400.901
AT1G06680	54057.2	0.393204	0.433454	0.907141	0.364332	0.875727	51196.5	40881.2	48128.7	92247.1	42735	49154.8
AT1G06690	465.878	-0.732379	1.56451	-0.468122	0.639698	0.983699	637.744	608.674	498.374	667.132	0	383.344
AT1G06700	715.021	0.112192	0.268282	0.418185	0.675812	0.98983	610.519	750.127	699.93	850.055	682.065	697.432
AT1G06710	6.25202	-1.11354	3.28374	-0.339105	0.73453	0.99548	0	19.289	6.51797	0	0	11.7052
AT1G06720	68.7608	-1.18925	1.4804	-0.803333	0.421782	0.915264	104.816	110.733	71.6977	25.8245	0	99.4938
AT1G06730	118.751	-0.235967	1.59361	-0.148071	0.882287	0.99995	150.418	102.16	132.365	279.765	0	47.796
AT1G06740.1	10.8536	1.55409	1.69826	0.91511	0.360134	0.871848	2.72249	5.71525	8.02212	30.1285	0	18.5332
AT1G06750	4.10328	-4.91801	2.77829	-1.77015	0.0767013	0.562465	2.72249	7.85847	14.0387	0	0	0
AT1G06760	489.897	0.877209	0.54019	1.62389	0.104399	0.646064	348.479	195.747	491.355	832.839	419.378	651.587
AT1G06770	36.5589	-0.597882	1.5213	-0.393009	0.694313	0.991112	68.7429	17.1457	46.1272	47.3448	0	39.9926
AT1G06780	195.145	-0.340727	0.656563	-0.518955	0.603792	0.975369	314.448	240.04	99.7751	142.034	256.542	118.027
AT1G06790	87.7874	1.7405	1.64908	1.05544	0.291225	0.831166	53.7692	24.2898	43.1189	331.414	0	74.1326
AT1G06800	107.625	0.00813188	0.867549	0.00937339	0.992521	0.99995	69.4235	139.309	112.31	230.268	47.6216	46.8206
AT1G06810	2.14322	-3.97661	3.91986	-1.01448	0.310355	0.836639	0	12.8593	0	0	0	0
AT1G06820	426.992	0.326326	0.651838	0.500625	0.616635	0.978186	400.206	304.337	432.693	170.011	775.772	478.936
AT1G06830	16.5659	2.41168	1.98825	1.21296	0.225143	0.799347	0.680623	13.5737	1.50415	49.4969	0	34.14
AT1G06840	130.457	-1.03977	0.845136	-1.2303	0.218585	0.796074	77.591	224.324	225.622	23.6724	99.8518	131.683
AT1G06850	122.963	-0.831191	1.51963	-0.546971	0.584398	0.971723	185.129	175.744	111.808	60.2571	0	204.84
AT1G06860	0	NA	NA	NA	NA	NA	0	0	0	0	0	0
AT1G06870	272.818	0.29439	0.880556	0.334323	0.738136	0.995744	291.987	262.187	180.999	163.555	662.094	76.0835
AT1G06880	0.781947	-2.53398	3.94223	-0.642777	0.520369	NA	0.680623	0	4.01106	0	0	0
AT1G06890	83.1249	-1.28559	1.41113	-0.911032	0.362279	0.873938	138.847	97.1592	117.825	58.105	0	86.8132
AT1G06900	254.83	0.457191	0.59702	0.765788	0.443803	0.923318	274.291	144.31	226.123	152.795	459.318	272.145
AT1G06910	93.2979	-0.397335	1.52766	-0.260095	0.794791	0.998906	46.2824	127.879	143.897	144.187	0	97.5429
AT1G06920	1.13437	-3.05845	3.93146	-0.777943	0.436603	NA	6.80623	0	0	0	0	0
AT1G06923	0.25603	2.24941	4.07431	0.552097	0.580882	NA	0	0	0	0	1.53618	0
AT1G06925	0.119068	0.279992	4.08047	0.0686175	0.945294	NA	0	0.714406	0	0	0	0
AT1G06930	0.417819	-1.64126	3.97232	-0.413175	0.679478	NA	0	0	2.50691	0	0	0
AT1G06950	899.292	0.338721	0.388849	0.871086	0.383707	0.888613	893.658	808.708	679.373	1106.15	1239.7	668.169
AT1G06960	429.879	0.748708	0.556433	1.34555	0.178448	0.767085	387.274	277.19	297.32	568.138	795.742	253.612
AT1G06970	3.62655	-4.73638	3.03644	-1.55985	0.118796	0.676684	13.6125	7.14406	1.00276	0	0	0
AT1G06980	18.3356	-4.22407	1.53673	-2.74874	0.00598244	0.120885	40.8374	35.7203	28.5788	0	0	4.87715
AT1G06990	1.97825	-3.86343	3.92092	-0.985336	0.324459	0.840982	0	7.85847	4.01106	0	0	0
AT1G07000	671.159	-0.108737	0.609363	-0.178444	0.858375	0.99995	503.661	691.545	894.466	307.741	1089.15	540.388
AT1G07010	757.955	-0.343892	0.418324	-0.822073	0.411036	0.908591	948.788	849.429	743.55	951.201	591.43	463.329
AT1G07020	373.525	0.175096	0.390005	0.448958	0.653462	0.986052	283.82	396.495	372.026	359.39	519.229	310.187
AT1G07025	0.238135	-0.786905	4.02438	-0.195535	0.844974	NA	0	1.42881	0	0	0	0
AT1G07030	195.25	-1.02835	0.498531	-2.06275	0.0391362	0.403373	198.742	262.901	324.896	86.0815	182.806	116.076
AT1G07040	217.46	-0.58857	1.57711	-0.373194	0.709004	0.992071	373.662	218.608	191.027	413.191	0	108.273
AT1G07050	2.75165	-3.1899	3.91158	-0.815502	0.414785	0.910307	14.9737	0	0	0	1.53618	0
AT1G07051	0	NA	NA	NA	NA	NA	0	0	0	0	0	0
AT1G07060	0	NA	NA	NA	NA	NA	0	0	0	0	0	0
AT1G07070	82.0473	0.0409476	1.79548	0.0228059	NA	NA	72.8267	62.1533	107.296	243.18	0	6.82801
AT1G07080	3222.79	-0.429674	0.457416	-0.93935	0.347551	0.862671	3732.54	3442.01	3921.81	4035.07	1574.59	2630.73
AT1G07090	23.6203	-2.19747	2.1123	-1.04032	0.298191	0.833712	17.0156	40.7212	58.1604	25.8245	0	0
AT1G07100	0	NA	NA	NA	NA	NA	0	0	0	0	0	0
AT1G07110	2543.99	0.370677	0.387171	0.9574	0.338365	0.854279	2198.41	2296.1	2163.47	1818.47	3702.2	3085.28
AT1G07119	0.113437	0.279992	4.08047	0.0686175	0.945294	NA	0.680623	0	0	0	0	0
AT1G07120	0	NA	NA	NA	NA	NA	0	0	0	0	0	0
AT1G07128	5.38191	-2.1106	2.23435	-0.944613	0.344857	0.860466	9.52872	9.28728	7.01935	6.45611	0	0
AT1G07130	12.576	1.2784	1.75843	0.72701	0.46722	0.937182	11.5706	8.57287	2.00553	17.2163	0	36.0909
AT1G07135	6353.62	-0.557054	0.394594	-1.41172	0.158034	0.74851	5032.53	7773.45	9890.27	4228.75	5822.13	5374.62
AT1G07140	1501.52	0.0618699	0.399679	0.154799	0.87698	0.99995	1481.72	1624.56	1300.08	2180.01	1298.07	1124.67
AT1G07150	93.0881	-0.679908	0.815342	-0.833893	0.404342	0.903603	51.0467	197.176	95.2627	75.3213	107.533	32.1892
AT1G07160	229.539	-2.31962	2.19386	-1.05733	0.290363	0.831166	145.653	669.399	331.915	230.268	0	0
AT1G07170	544.009	0.629008	0.642494	0.97901	0.327575	0.844016	528.844	359.346	393.084	1082.47	245.789	654.513
AT1G07175	0.501382	-1.90109	3.9616	-0.479878	0.631314	NA	0	0	3.00829	0	0	0
AT1G07180	1603.67	-0.302355	0.468767	-0.645001	0.518927	0.95617	1989.46	1547.4	1774.89	2223.05	929.39	1157.83
AT1G07190	1.67127	-3.62604	3.92345	-0.924197	0.355384	NA	0	0	10.0276	0	0	0
AT1G07200	78.5595	-0.819478	1.46258	-0.560298	0.575276	0.97007	93.926	79.2991	127.853	58.105	0	112.174
AT1G07210	149.65	-0.347057	1.52428	-0.227687	0.81989	0.99995	148.376	207.178	146.905	275.461	0	119.978
AT1G07220	215.556	0.254146	0.585502	0.434065	0.664241	0.987335	268.846	132.88	189.021	172.163	159.763	370.663
AT1G07230	187.253	-0.755995	1.49856	-0.50448	0.613924	0.977643	179.004	284.334	242.168	256.092	0	161.921
AT1G07240	457.407	0.410494	0.438642	0.93583	0.349361	0.86427	314.448	486.511	378.544	337.87	563.779	663.292
AT1G07250	406.32	0.135283	1.63236	0.0828759	0.93395	0.99995	498.897	292.192	370.522	985.633	0	290.678
AT1G07260	22.1192	-0.906377	1.64521	-0.550919	0.581689	0.971632	52.408	7.85847	26.5733	10.7602	0	35.1155
AT1G07270	32.5532	3.38002	3.06494	1.1028	NA	NA	13.6125	0	3.50968	0	178.197	0
AT1G07280	882.253	-0.0487982	0.377295	-0.129337	0.897091	0.99995	1108.73	890.865	693.412	705.868	797.278	1097.36
AT1G07290	3.8279	-4.81595	2.69255	-1.78862	0.0736762	0.551709	5.44498	10.0017	7.52074	0	0	0
AT1G07300	116.411	-1.91826	1.76359	-1.0877	0.276726	0.825214	164.711	220.752	167.462	2.15204	0	143.388
AT1G07310	1215.97	0.433453	0.402328	1.07736	0.281318	0.82868	842.611	1044.46	1215.85	1891.64	989.301	1311.95
AT1G07320	2307.22	-0.0311958	0.528732	-0.0590012	0.952951	0.99995	2493.8	2318.25	2183.02	3856.45	1347.23	1644.57
AT1G07330	3.11649	-4.51858	3.91576	-1.15395	0.248522	0.812501	17.6962	0	1.00276	0	0	0
AT1G07340	1.03783	-2.92907	3.93377	-0.744595	0.456517	NA	4.08374	2.14322	0	0	0	0
AT1G07350	506.74	-1.94918	1.64014	-1.18843	0.234665	0.805745	794.968	775.845	844.829	47.3448	0	577.454
AT1G07360	844.582	-0.10742	0.310165	-0.346333	0.729092	0.994843	944.024	793.705	889.452	804.862	987.765	647.685
AT1G07370	32.4425	0.183916	1.60856	0.114336	0.908971	0.99995	25.8637	32.8627	32.0885	88.2335	0	15.6069
AT1G07380	41.2176	-0.857857	2.27302	-0.377409	0.705869	0.991112	86.4391	53.5805	19.0525	88.2335	0	0
AT1G07390	23.6647	-0.635003	1.8197	-0.34896	0.727119	0.994738	48.3242	21.4322	17.047	0	1.53618	53.6486
AT1G07400	58.9027	1.41709	1.68225	0.84238	0.399576	0.900574	38.1149	20.0034	38.1051	55.953	201.24	0
AT1G07410	7.97542	-1.72569	2.12188	-0.813282	0.416057	0.911102	19.7381	7.85847	9.52627	0	0	10.7297
AT1G07420	669.558	0.769815	0.59994	1.28315	0.199439	0.786939	310.364	710.834	463.277	1129.82	1003.13	399.926
AT1G07430	230.223	1.01453	0.63421	1.59967	0.109672	0.65978	174.92	95.016	188.018	144.187	304.164	475.034
AT1G07440	766.141	0.544462	0.389853	1.39658	0.162539	0.751166	737.115	529.375	604.166	621.939	1133.7	970.552
AT1G07450	124.95	-0.24004	0.888078	-0.270291	0.786936	0.998906	100.052	165.028	140.888	47.3448	253.47	42.9189
AT1G07460	0.340311	-1.31489	3.98876	-0.329648	0.741666	NA	2.04187	0	0	0	0	0
AT1G07470	489.736	0.128027	0.637646	0.20078	0.840871	0.99995	319.212	534.376	551.521	197.987	553.025	782.294
AT1G07473	28.0671	-4.65365	1.19608	-3.89076	9.99e-05	0.00578093	39.4761	42.15	80.7226	2.15204	0	3.90172
AT1G07476	1.92865	-2.75843	2.57014	-1.07326	0.283154	0.82868	5.44498	2.14322	3.00829	0	0	0.975429
AT1G07480	626.026	-1.00865	1.56405	-0.644898	0.518993	0.95617	867.114	880.863	761.098	652.067	0	595.012
AT1G07485	7.43822	0.169035	2.34717	0.0720164	0.942589	0.99995	8.8481	7.85847	4.51244	0	0	23.4103
AT1G07490	0	NA	NA	NA	NA	NA	0	0	0	0	0	0
AT1G07500	152.92	-0.493295	0.68921	-0.71574	0.474152	0.940597	183.768	113.591	240.162	53.8009	121.358	204.84
AT1G07510	207.712	-0.582385	0.634934	-0.917237	0.359019	0.871644	192.616	256.472	298.824	161.403	70.6644	266.292
AT1G07520	169.767	0.488685	0.916077	0.533454	0.593719	0.97439	129.999	151.454	142.393	77.4734	457.782	59.5012
AT1G07530	263.22	1.11316	0.71783	1.55074	0.120965	0.681078	122.512	138.595	238.157	161.403	672.848	245.808
AT1G07540	4.96879	-0.850637	3.77473	-0.22535	0.821707	0.99995	0	0	19.0525	10.7602	0	0
AT1G07550	0	NA	NA	NA	NA	NA	0	0	0	0	0	0
AT1G07560	0.680623	-2.31955	3.94788	-0.587543	0.556839	NA	4.08374	0	0	0	0	0
AT1G07570	150.383	-0.606005	1.50864	-0.401691	0.687912	0.991112	183.768	213.607	147.406	109.754	0	247.759
AT1G07580	0	NA	NA	NA	NA	NA	0	0	0	0	0	0
AT1G07590	2003.78	2.86906	0.457197	6.27532	3.49e-10	1.55e-07	642.508	392.209	413.139	3077.41	2467.11	5030.29
AT1G07600	0	NA	NA	NA	NA	NA	0	0	0	0	0	0
AT1G07610	216.815	2.44563	0.457125	5.35003	8.79e-08	1.71e-05	87.8004	63.5822	50.6396	411.039	259.615	428.213
AT1G07615	61.3971	-0.745539	1.51891	-0.490837	0.623542	0.98063	83.7166	52.8661	93.7585	109.754	0	28.2875
AT1G07620	51.6513	1.53566	2.33135	0.6587	NA	NA	25.183	25.7186	28.5788	0	230.427	0
AT1G07630	282.079	-0.657577	1.52481	-0.431253	0.666285	0.988098	352.563	407.926	275.259	367.998	0	288.727
AT1G07640	68.3525	4.06795	2.09489	1.94184	0.0521561	0.469975	7.48685	0	15.5429	0	181.269	205.816
AT1G07645	0	NA	NA	NA	NA	NA	0	0	0	0	0	0
AT1G07650	497.125	0.356249	0.824969	0.431833	0.665863	0.987911	224.606	542.949	540.992	131.274	990.837	552.093
AT1G07660	360.059	-1.03219	1.53453	-0.672644	0.501174	0.951669	379.107	502.942	569.069	241.028	0	468.206
AT1G07670	244.537	0.184701	0.902147	0.204735	0.837779	0.99995	162.669	256.472	267.738	58.105	572.996	149.241
AT1G07680	0	NA	NA	NA	NA	NA	0	0	0	0	0	0
AT1G07690	0	NA	NA	NA	NA	NA	0	0	0	0	0	0
AT1G07700	1555.48	-0.105294	0.303194	-0.347283	0.728379	0.994843	1441.56	1595.27	1798.96	1764.67	1184.4	1548.01
AT1G07702	0	NA	NA	NA	NA	NA	0	0	0	0	0	0
AT1G07705	183.391	0.294572	1.63533	0.18013	0.857051	0.99995	205.548	165.028	123.34	518.641	0	87.7886
AT1G07710	14.7951	-6.76731	1.93657	-3.49449	0.000474977	0.0192849	14.2931	32.8627	41.6147	0	0	0
AT1G07720	375.583	-0.398909	0.463936	-0.859835	0.38988	0.893796	278.375	414.356	588.122	329.262	391.726	251.661
AT1G07725	0.476271	-1.79762	3.96565	-0.453297	0.650335	NA	0	2.85762	0	0	0	0
AT1G07728	0.238135	-0.786905	4.02438	-0.195535	0.844974	NA	0	1.42881	0	0	0	0
AT1G07730	0	NA	NA	NA	NA	NA	0	0	0	0	0	0
AT1G07740	1.50415	-3.47464	3.92529	-0.885193	0.376053	NA	0	0	9.02488	0	0	0
AT1G07745	239.341	-1.2249	0.923555	-1.32629	0.184743	0.770564	306.961	437.217	262.223	135.578	19.9704	274.096
AT1G07747	0.417819	-1.64126	3.97232	-0.413175	0.679478	NA	0	0	2.50691	0	0	0
AT1G07750	216.458	-1.22844	1.52531	-0.80537	0.420606	0.914868	367.536	272.903	270.245	81.7774	0	306.285
AT1G07760	0	NA	NA	NA	NA	NA	0	0	0	0	0	0
AT1G07770	685.67	0.841245	0.646574	1.30108	0.193231	0.780756	517.273	510.8	444.726	1521.49	798.815	320.916
AT1G07780	62.4637	2.70714	0.754216	3.58934	0.000331517	0.0147787	17.0156	17.1457	15.5429	96.8417	184.342	43.8943
AT1G07790	199.741	0.560601	0.54095	1.03633	0.30005	0.833712	231.412	115.734	136.877	221.66	331.815	160.946
AT1G07795	0.119068	0.279992	4.08047	0.0686175	0.945294	NA	0	0.714406	0	0	0	0
AT1G07800.1	0	NA	NA	NA	NA	NA	0	0	0	0	0	0
AT1G07810	338.352	0.49534	0.359843	1.37655	0.168652	0.757372	326.018	284.334	231.639	417.495	462.391	308.236
AT1G07820	664.051	0.516146	0.512272	1.00756	0.313665	0.837185	397.484	527.232	713.969	1142.73	465.463	737.425
AT1G07830	179.262	0.0649962	1.57683	0.0412195	0.967121	0.99995	127.957	216.465	180.999	417.495	0	132.658
AT1G07840	302.974	-0.0324078	0.387772	-0.0835743	0.933395	0.99995	389.316	254.329	276.262	234.572	350.249	313.113
AT1G07850	5.01989	-5.20769	3.91235	-1.33109	0.183159	0.769932	0	13.5737	16.5456	0	0	0
AT1G07860	0.238135	-0.786905	4.02438	-0.195535	0.844974	NA	0	1.42881	0	0	0	0
AT1G07870	736.617	0.481104	0.440805	1.09142	0.275088	0.825214	412.458	794.42	638.761	701.564	741.976	1130.52
AT1G07880	26.8501	1.4517	2.02396	0.717256	0.473216	0.940412	4.08374	14.2881	24.5677	116.21	0	1.95086
AT1G07885	0	NA	NA	NA	NA	NA	0	0	0	0	0	0
AT1G07890	7242.94	-0.479803	0.459389	-1.04444	0.296283	0.833624	7652.24	8157.8	9498.19	8453.2	3322.76	6373.46
AT1G07900	162.168	-4.31088	1.8685	-2.30713	0.0210475	0.280112	168.794	332.199	424.671	47.3448	0	0
AT1G07901	39.7561	0.0737611	1.57465	0.0468429	0.962638	0.99995	44.2405	18.5746	53.1465	90.3856	0	32.1892
AT1G07910	91.687	-0.353931	1.52793	-0.23164	0.816817	0.99995	127.276	95.7304	85.7364	0	204.312	37.0663
AT1G07920	2599.73	-0.564778	0.9205	-0.613555	0.539509	0.961607	4119.81	2506.85	2679.39	4011.4	244.253	2036.7
AT1G07930	1507.83	0.0123144	0.555829	0.022155	0.982324	0.99995	1910.51	1272.36	1320.14	2535.1	851.045	1157.83
AT1G07940	1505.68	-0.134025	0.595826	-0.224941	0.822025	0.99995	1785.95	1421.67	1517.68	2595.36	760.41	952.994
AT1G07950	94.9836	0.467306	0.910918	0.513006	0.607947	0.976092	102.774	77.8703	58.6617	146.339	18.4342	165.823
AT1G07960	336.113	-0.137209	1.58246	-0.0867062	0.930905	0.99995	360.73	345.773	349.965	275.461	0	684.751
AT1G07970	91.3407	-1.08069	2.15918	-0.500508	0.616718	0.978186	204.187	98.5881	69.6922	0	0	175.577
AT1G07980	236.224	0.801435	0.518116	1.54683	0.121905	0.68368	176.962	135.023	205.065	174.315	436.276	289.703
AT1G07985	29.2321	1.21048	1.59178	0.760457	0.446982	0.924624	26.5443	9.28728	17.047	68.8652	0	53.6486
AT1G07990	298.278	-0.111901	0.767189	-0.145858	0.884033	0.99995	456.017	238.612	235.65	75.3213	427.059	357.007
AT1G08000	78.0225	-0.981746	1.53228	-0.640709	0.521712	0.956894	136.805	115.734	58.6617	30.1285	0	126.806
AT1G08005	0	NA	NA	NA	NA	NA	0	0	0	0	0	0
AT1G08010	319.987	-0.793907	1.53794	-0.516216	0.605704	0.975507	412.458	541.52	263.727	312.045	0	390.172
AT1G08030	198.935	-0.139698	1.527	-0.091485	0.927107	0.99995	243.663	215.036	166.96	294.829	0	273.12
AT1G08032	0	NA	NA	NA	NA	NA	0	0	0	0	0	0
AT1G08035	8.58881	-0.132315	2.47611	-0.0534366	0.957384	0.99995	17.6962	1.42881	8.02212	0	0	24.3857
AT1G08040	223.144	-0.844893	0.746053	-1.13248	0.257431	0.81487	270.207	319.34	271.248	150.643	44.5493	282.875
AT1G08050	14.0938	0.80799	2.32464	0.347577	0.728158	0.994843	12.2512	12.1449	6.51797	0	0	53.6486
AT1G08060	41.9159	-0.306063	2.21129	-0.138409	NA	NA	59.8948	57.8669	21.5594	0	0	112.174
AT1G08065	0	NA	NA	NA	NA	NA	0	0	0	0	0	0
AT1G08070	12.9159	-0.621738	2.29264	-0.271188	0.786246	0.998906	21.0993	22.1466	4.01106	0	0	30.2383
AT1G08080	0.113437	0.279992	4.08047	0.0686175	0.945294	NA	0.680623	0	0	0	0	0
AT1G08090	0	NA	NA	NA	NA	NA	0	0	0	0	0	0
AT1G08100	0	NA	NA	NA	NA	NA	0	0	0	0	0	0
AT1G08105.1	0	NA	NA	NA	NA	NA	0	0	0	0	0	0
AT1G08110	1417.41	0.347715	0.303576	1.1454	0.252045	0.812909	1229.89	1240.92	1270.5	1947.59	1230.48	1585.07
AT1G08115	7.66177	1.23842	2.45676	0.504085	0.614201	0.977643	3.40311	2.85762	7.52074	0	0	32.1892
AT1G08120	0	NA	NA	NA	NA	NA	0	0	0	0	0	0
AT1G08125	303.058	1.05618	1.16615	0.905704	0.365092	0.875802	180.365	207.178	203.06	17.2163	964.722	245.808
AT1G08130	147.152	0.0747113	1.02041	0.0732172	0.941633	0.99995	172.878	105.018	152.42	15.0643	308.773	128.757
AT1G08135	0.567186	-2.05556	3.95608	-0.519596	0.603345	NA	3.40311	0	0	0	0	0
AT1G08140	0	NA	NA	NA	NA	NA	0	0	0	0	0	0
AT1G08150	0.680623	-2.31955	3.94788	-0.587543	0.556839	NA	4.08374	0	0	0	0	0
AT1G08160	0.325143	2.73332	4.05906	0.673389	0.5007	NA	0	0	0	0	0	1.95086
AT1G08165	0.835637	-2.63134	3.93993	-0.667865	0.50422	NA	0	0	5.01382	0	0	0
AT1G08170	4.28184	0.446142	3.72428	0.119793	0.904647	0.99995	10.89	0	0	0	13.8256	0.975429
AT1G08180	49.8525	-0.472453	1.63225	-0.289449	0.772238	0.997537	52.408	52.1517	69.1908	19.3683	105.997	0
AT1G08190	587.394	-0.166106	0.579107	-0.286832	0.774241	0.997537	660.204	506.514	697.423	555.226	242.717	862.28
AT1G08200	2997.08	0.121738	0.466782	0.260802	0.794245	0.998906	2650.35	2628.3	3333.19	3970.51	1654.47	3745.65
AT1G08210	86.1312	-1.17414	1.43434	-0.818595	0.413017	0.910132	132.041	75.7271	150.415	68.8652	0	89.7395
AT1G08220	38.9591	-2.42927	1.97465	-1.23022	0.218613	0.796074	55.1305	111.447	31.0857	0	0	36.0909
AT1G08230	465.897	-0.977051	0.609113	-1.60406	0.108702	0.65793	581.933	550.807	719.985	503.577	125.967	313.113
AT1G08240	0	NA	NA	NA	NA	NA	0	0	0	0	0	0
AT1G08250	359.408	0.150633	0.452954	0.332557	0.739468	0.995744	368.898	309.338	344.45	376.607	230.427	526.732
AT1G08260	68.625	2.00823	0.978445	2.05247	0.0401236	0.408293	27.9055	30.0051	24.0664	51.6489	248.861	29.2629
AT1G08270	9.98401	-0.54287	1.78735	-0.30373	0.761334	0.996633	17.6962	10.7161	7.52074	0	1.53618	22.4349
AT1G08280	16.7494	-4.3984	1.58194	-2.78038	0.00542945	0.113509	35.3924	42.15	19.0525	0	0	3.90172
AT1G08290	13.9587	2.64638	3.74617	0.706423	NA	NA	11.5706	0	0	0	0	72.1818
AT1G08300	58.7658	2.53369	1.22704	2.06488	0.0389347	0.402328	15.6543	8.57287	27.576	47.3448	242.717	10.7297
AT1G08310	17.5669	-1.65182	2.19605	-0.752176	0.451945	0.927862	22.4606	43.5788	13.5373	25.8245	0	0
AT1G08315	209.76	-0.324622	0.440473	-0.736986	0.461131	0.933803	281.097	195.747	221.611	234.572	199.704	125.83
AT1G08320	3.86688	-4.83277	3.914	-1.23474	0.216928	0.795989	0	2.14322	21.0581	0	0	0
AT1G08340	6.12561	-5.49382	3.91134	-1.40458	0.160145	0.750598	36.7536	0	0	0	0	0
AT1G08350	50.7484	-2.16571	2.10887	-1.02696	0.304441	0.834296	38.1149	88.5864	121.836	55.953	0	0
AT1G08360	1897.83	0.206502	0.517565	0.398987	0.689902	0.991112	1975.17	1703.14	1606.93	3355.03	1546.94	1199.78
AT1G08370	491.809	-0.068982	0.672995	-0.1025	0.91836	0.99995	639.105	440.789	431.189	542.313	155.154	742.302
AT1G08380	67491.8	0.266955	0.468595	0.569692	0.568887	0.967857	64915.8	55135	63743.8	115991	47134.7	58031.2
AT1G08390	338.806	0.691515	0.756991	0.913504	0.360977	0.872837	295.39	227.181	254.702	251.788	852.581	151.192
AT1G08400	73.6361	0.177774	1.47254	0.120726	0.903908	0.99995	91.2035	62.1533	54.1493	0	158.227	76.0835
AT1G08410	107.564	0.340392	1.77431	0.191844	NA	NA	114.345	80.7279	89.7474	0	351.786	8.77886
AT1G08420	75.1489	0.220031	0.5801	0.379299	0.704466	0.991112	100.052	62.1533	46.6286	73.1693	64.5196	104.371
AT1G08430	0.79406	-2.54263	3.94202	-0.645006	0.518923	NA	4.76436	0	0	0	0	0
AT1G08440	0	NA	NA	NA	NA	NA	0	0	0	0	0	0
AT1G08450	682.194	-0.340623	0.368945	-0.923237	0.355884	0.869777	564.236	827.997	895.97	499.273	576.068	729.621
AT1G08460	163.368	-1.70401	1.47148	-1.15803	0.246851	0.812396	241.621	233.611	274.256	182.923	0	47.796
AT1G08465	157.821	-0.628181	1.50338	-0.417845	0.67606	0.98983	138.166	190.746	246.179	137.73	0	234.103
AT1G08470	136.239	0.0299102	1.53098	0.0195366	0.984413	0.99995	127.957	115.734	160.944	137.73	0	275.071
AT1G08480	668.351	-0.300115	0.310847	-0.965475	0.334307	0.849847	851.459	675.828	685.891	639.155	480.825	676.948
AT1G08490	1383.81	-0.0386925	0.357282	-0.108297	0.91376	0.99995	1708.36	1218.78	1278.53	1650.61	1430.19	1016.4
AT1G08500	89.1509	1.16776	1.752	0.666533	0.50507	0.952071	14.9737	52.1517	97.7696	45.1928	0	324.818
AT1G08510	698.705	-0.596983	0.453079	-1.31761	0.187633	0.772483	668.372	967.306	887.948	675.74	325.671	667.194
AT1G08520	1538.26	0.144285	0.363715	0.396699	0.691589	0.991112	1511.66	1405.24	1466.54	1575.29	2138.37	1132.47
AT1G08530	275.393	0.732217	0.323145	2.26591	0.023457	0.300971	188.533	222.18	211.082	309.893	304.164	416.508
AT1G08540	745.662	-0.0920054	0.32919	-0.27949	0.779868	0.997844	813.344	703.69	789.677	929.68	589.894	647.685
AT1G08550	778.515	0.148686	0.335091	0.443718	0.657246	0.986934	898.422	690.116	625.725	949.049	846.436	661.341
AT1G08560	19.471	-2.64337	1.93295	-1.36753	0.171458	0.760788	41.518	13.5737	46.1272	0	0	15.6069
AT1G08570	1235.41	-0.746577	0.629167	-1.18661	0.235381	0.805745	1570.88	1671	1403.87	675.74	402.48	1688.47
AT1G08580	333.581	0.755608	0.766043	0.986378	0.323948	0.84055	186.491	285.762	271.749	503.577	654.413	99.4938
AT1G08590	4.66888	2.8336	3.47461	0.815515	0.414778	0.910307	0	1.42881	2.00553	0	24.5789	0
AT1G08592	0	NA	NA	NA	NA	NA	0	0	0	0	0	0
AT1G08600	81.2866	-0.887072	1.43978	-0.616116	0.537818	0.961356	98.0097	85.7287	132.866	77.4734	0	93.6412
AT1G08610	70.8079	-3.16668	1.83273	-1.72785	0.0840154	0.592419	138.166	141.452	103.285	0	0	41.9435
AT1G08620	157.65	-1.34618	0.839504	-1.60354	0.108816	0.658058	302.877	230.039	145.401	154.947	19.9704	92.6658
AT1G08630	298.501	-0.395857	1.5595	-0.253836	0.799622	0.998906	339.631	438.645	239.159	501.425	0	272.145
AT1G08640	1104.27	0.486573	0.470785	1.03354	0.301353	0.833712	963.082	935.158	860.372	1908.86	728.15	1230.02
AT1G08650	542.426	0.378008	1.09619	0.344838	0.730216	0.994843	436.279	537.948	441.718	225.964	56.8387	1555.81
AT1G08660	690.058	-0.521716	0.591036	-0.882715	0.37739	0.883801	797.69	688.688	955.133	221.66	808.032	669.145
AT1G08670	0	NA	NA	NA	NA	NA	0	0	0	0	0	0
AT1G08680	191.027	-0.330599	0.763553	-0.432975	0.665033	0.987773	170.836	273.618	195.038	43.0408	201.24	262.39
AT1G08695	0	NA	NA	NA	NA	NA	0	0	0	0	0	0
AT1G08700	189.148	0.079114	0.489693	0.161558	0.871654	0.99995	191.936	175.03	183.506	292.677	165.908	125.83
AT1G08710	215.185	0.197854	0.724085	0.273248	0.784663	0.998778	197.381	205.749	197.545	415.343	72.2005	202.889
AT1G08720	246.584	1.20581	1.09763	1.09855	0.271962	0.823926	98.6903	207.178	141.891	17.2163	483.897	530.634
AT1G08730	3.67503	-4.75619	3.9144	-1.21505	0.224347	0.799027	16.335	5.71525	0	0	0	0
AT1G08735.1	0	NA	NA	NA	NA	NA	0	0	0	0	0	0
AT1G08740.1	0	NA	NA	NA	NA	NA	0	0	0	0	0	0
AT1G08750	193.221	0.310072	0.904209	0.34292	0.731658	0.994945	206.909	132.165	178.994	30.1285	359.467	251.661
AT1G08760	180.569	0.987682	0.353486	2.79412	0.0052041	0.109763	121.832	135.023	106.293	275.461	195.095	249.71
AT1G08770	444.701	-0.104247	0.627305	-0.166182	0.868014	0.99995	465.546	394.352	521.438	520.793	612.937	153.142
AT1G08780	152.801	0.323942	0.792501	0.408759	0.682716	0.990738	123.873	145.739	136.877	327.11	47.6216	135.585
AT1G08790	0	NA	NA	NA	NA	NA	0	0	0	0	0	0
AT1G08800	85.9076	0.681178	1.5348	0.443824	0.65717	0.986934	84.3972	47.8652	65.6811	172.163	0	145.339
AT1G08810	49.7764	-2.20389	1.3041	-1.68997	0.0910329	0.611653	59.2142	74.2982	111.808	27.9765	0	25.3612
AT1G08820	427.695	0.313704	0.42397	0.739921	0.459348	0.932864	271.569	480.795	392.081	374.455	608.328	438.943
AT1G08830	1001.39	-0.646196	0.327392	-1.97377	0.0484081	0.453959	1095.12	1310.22	1262.48	574.594	869.479	896.42
AT1G08840	210.573	-0.175269	0.44258	-0.396017	0.692093	0.991112	296.752	221.466	151.417	223.812	201.24	168.749
AT1G08845	120.403	-0.35032	1.51382	-0.231415	0.816993	0.99995	180.365	109.304	115.318	0	255.006	62.4275
AT1G08860	0	NA	NA	NA	NA	NA	0	0	0	0	0	0
AT1G08870	0	NA	NA	NA	NA	NA	0	0	0	0	0	0
AT1G08880	509.672	0.489146	0.443687	1.10246	0.270263	0.82275	430.834	372.206	470.297	469.144	434.739	880.813
AT1G08890	315.915	-1.55165	1.49898	-1.03514	0.300605	0.833712	253.872	557.237	602.16	264.701	0	217.521
AT1G08900	1104.54	0.0206095	0.385862	0.0534117	0.957404	0.99995	905.909	1047.32	1337.69	994.241	863.334	1478.75
AT1G08910	459.517	0.0278623	0.473964	0.0587858	0.953123	0.99995	400.206	463.65	502.385	411.039	287.266	692.555
AT1G08920	593.97	0.345341	0.915403	0.377256	0.705984	0.991112	242.982	806.565	520.936	157.099	410.161	1426.08
AT1G08930	4325.36	0.23518	0.579609	0.405756	0.684922	0.990923	2663.96	4810.1	4447.26	2205.84	7393.64	4431.38
AT1G08940	173.808	-1.039	0.666939	-1.55786	0.119266	0.677201	123.193	275.046	302.835	159.251	53.7664	128.757
AT1G08950	0	NA	NA	NA	NA	NA	0	0	0	0	0	0
AT1G08960	88.2249	-0.231528	1.55363	-0.149024	0.881535	0.99995	86.4391	99.3025	99.7751	197.987	0	45.8452
AT1G08970	416.478	0.638155	0.579084	1.10201	0.270458	0.823095	240.941	357.203	379.045	421.799	832.611	267.268
AT1G08980	1344.52	0.434228	0.239983	1.80941	0.0703875	0.542084	1046.8	1249.5	1135.13	1588.2	1379.49	1667.98
AT1G08985	5.65169	-1.05236	2.24924	-0.467872	0.639876	0.983699	5.44498	10.7161	7.01935	0	0	10.7297
AT1G08990	0	NA	NA	NA	NA	NA	0	0	0	0	0	0
AT1G09000	8.12724	-2.29739	2.0022	-1.14744	0.251202	0.812501	8.8481	18.5746	13.5373	0	0	7.80343
AT1G09010	422.32	-0.953566	1.54843	-0.615828	0.538008	0.961356	720.099	581.527	369.519	380.911	0	481.862
AT1G09020	264.596	-0.924009	0.754707	-1.22433	0.220829	0.796943	300.835	335.771	404.114	133.426	58.3749	355.056
AT1G09026	0	NA	NA	NA	NA	NA	0	0	0	0	0	0
AT1G09030	0	NA	NA	NA	NA	NA	0	0	0	0	0	0
AT1G09040	35.849	1.06531	1.62073	0.657301	0.510988	0.954051	37.4343	8.57287	23.565	64.5611	0	80.9606
AT1G09050	7.10938	-5.70897	2.22873	-2.56153	0.0104211	0.179354	16.335	14.2881	12.0332	0	0	0
AT1G09060	181.787	0.256286	0.532548	0.481245	0.630343	0.980642	169.475	191.461	135.875	269.005	104.46	220.447
AT1G09070	12459.8	-0.168821	0.357747	-0.471899	0.636999	0.982942	10890.6	15068.3	13605	13501.9	8247.76	13445.3
AT1G09080	55.6145	-1.74861	2.04026	-0.857051	0.391417	0.895033	68.7429	117.163	71.6977	0	0	76.0835
AT1G09090	1.87711	-1.42085	3.82309	-0.37165	0.710153	NA	4.76436	3.57203	0	0	0	2.92629
AT1G09100	112.568	-0.0997575	1.51231	-0.0659636	0.947407	0.99995	111.622	79.2991	158.437	159.251	0	166.798
AT1G09110	0	NA	NA	NA	NA	NA	0	0	0	0	0	0
AT1G09130	1554.07	-0.0178394	0.706063	-0.025266	0.979843	0.99995	1794.8	1336.65	1558.8	2789.04	453.174	1391.94
AT1G09140	2382.29	-0.62084	0.400436	-1.55041	0.121043	0.681135	3138.35	2812.62	2712.48	1162.1	2046.19	2421.99
AT1G09150	392.894	-0.039698	0.684014	-0.0580369	0.953719	0.99995	287.223	462.221	445.729	447.624	124.431	590.135
AT1G09155	2.276	5.32535	3.93651	1.35281	0.176116	0.763943	0	0	0	0	0	13.656
AT1G09157	19.946	-1.30227	2.09504	-0.621599	0.534205	0.96096	27.9055	38.5779	19.0525	0	0	34.14
AT1G09160	778.936	0.151404	0.396214	0.382127	0.702367	0.991112	586.697	674.399	952.627	763.973	1049.21	646.71
AT1G09170	18.6627	1.29373	3.19343	0.405122	0.685388	0.990923	0	9.28728	23.0636	79.6254	0	0
AT1G09176	1.14478	-3.07724	3.93114	-0.782786	0.433753	NA	0	2.85762	4.01106	0	0	0
AT1G09180	35.8312	-2.2906	1.43433	-1.59698	0.11027	0.660235	21.0993	65.011	92.7557	10.7602	0	25.3612
AT1G09190	17.7152	0.142161	2.54593	0.0558385	0.95547	0.99995	0.680623	21.4322	28.5788	0	0	55.5995
AT1G09195	66.7334	0.0715342	1.51512	0.0472136	0.962343	0.99995	80.3135	77.8703	37.1023	96.8417	0	108.273
AT1G09200	486.639	1.90372	0.595349	3.19766	0.00138549	0.0424202	158.585	153.597	303.336	503.577	1253.52	547.216
AT1G09210	709.552	0.0795122	0.275662	0.288441	0.773009	0.997537	817.428	622.248	630.238	718.781	781.917	686.702
AT1G09220	12.9142	-2.26758	1.93233	-1.1735	0.240596	0.809137	15.6543	0.714406	47.6313	8.60815	0	4.87715
AT1G09230	538.49	0.155997	0.307883	0.506678	0.612381	0.977519	473.033	615.104	441.217	505.729	563.779	632.078
AT1G09240	89.4462	1.99538	1.61772	1.23345	0.217407	0.795989	21.0993	55.0093	31.5871	133.426	0	295.555
AT1G09245	0	NA	NA	NA	NA	NA	0	0	0	0	0	0
AT1G09250	634.168	-0.25603	0.531186	-0.481997	0.629808	0.98063	680.623	720.836	669.847	652.067	264.223	817.41
AT1G09260	0	NA	NA	NA	NA	NA	0	0	0	0	0	0
AT1G09270	564.079	-0.380364	0.541246	-0.702756	0.482208	0.944561	537.012	624.391	751.572	761.821	247.325	462.353
AT1G09280	173.969	0.0760263	0.448066	0.169676	0.865265	0.99995	147.015	196.462	163.451	249.636	153.618	133.634
AT1G09290	152.576	-0.198522	0.996488	-0.199221	0.84209	0.99995	204.868	125.735	158.938	15.0643	281.121	129.732
AT1G09300	186.692	-0.300413	0.654925	-0.458698	0.646451	0.984549	178.323	311.481	129.357	77.4734	208.921	214.594
AT1G09310	19170.5	-0.513927	0.641798	-0.800761	0.42327	0.915776	20521.5	21027.1	26098	29975.7	7198.55	10202
AT1G09320	62.8081	-0.794759	1.52345	-0.521684	0.601891	0.975369	119.109	62.1533	58.1604	30.1285	0	107.297
AT1G09330	681.491	0.36873	0.502659	0.733559	0.463218	0.935219	533.608	662.969	587.62	688.652	1185.93	430.164
AT1G09340	14856.1	0.133734	0.544765	0.24549	0.806077	0.998906	15834.7	12543.5	14124.4	26818.7	9155.64	10659.5
AT1G09350	13.7584	-2.04912	1.98549	-1.03204	0.302052	0.833832	15.6543	25.7186	25.5705	0	0	15.6069
AT1G09360	0	NA	NA	NA	NA	NA	0	0	0	0	0	0
AT1G09370	0	NA	NA	NA	NA	NA	0	0	0	0	0	0
AT1G09380	0	NA	NA	NA	NA	NA	0	0	0	0	0	0
AT1G09390	374.585	-0.520252	0.58087	-0.895642	0.370444	0.878525	458.059	445.789	418.654	525.097	245.789	154.118
AT1G09400	27.5415	-0.00195188	1.50435	-0.00129749	0.998965	0.99995	34.0311	30.0051	18.5511	49.4969	0	33.1646
AT1G09410	14.5358	1.10975	2.43031	0.456629	0.647938	0.98458	6.80623	2.85762	18.0498	0	0	59.5012
AT1G09415	433.853	0.691047	0.653366	1.05767	0.290205	0.831166	434.237	181.459	379.045	871.575	479.289	257.513
AT1G09420	60.1305	-0.922607	1.64793	-0.559857	0.575577	0.970123	117.067	36.4347	82.7281	0	116.75	7.80343
AT1G09421	0	NA	NA	NA	NA	NA	0	0	0	0	0	0
AT1G09430	975.565	-1.0394	0.782094	-1.32899	0.183851	0.769999	1429.99	1335.94	1171.73	878.031	119.822	917.879
AT1G09440	69.9926	-0.571416	1.55317	-0.367903	0.712945	0.992307	102.093	69.2974	79.2184	142.034	0	27.312
AT1G09450	0.238135	-0.786905	4.02438	-0.195535	0.844974	NA	0	1.42881	0	0	0	0
AT1G09460	13.5529	-2.74411	3.23775	-0.847536	0.396696	0.898663	3.40311	67.1542	0	10.7602	0	0
AT1G09470	0.238135	-0.786905	4.02438	-0.195535	0.844974	NA	0	1.42881	0	0	0	0
AT1G09480	10.7535	-0.601821	2.38384	-0.252459	0.800686	0.998906	14.2931	22.861	2.00553	0	0	25.3612
AT1G09483	0.453749	-1.73222	3.96835	-0.436509	0.662467	NA	2.72249	0	0	0	0	0
AT1G09486	21.3736	-5.63226	1.54205	-3.65245	0.000259751	0.0123203	26.5443	38.5779	61.1687	0	0	1.95086
AT1G09490	965.715	0.292141	0.364497	0.801489	0.422848	0.915642	885.49	860.145	860.874	776.886	977.012	1433.88
AT1G09500	357.636	0.138827	1.09177	0.127158	0.898816	0.99995	494.132	198.605	328.405	256.092	840.291	28.2875
AT1G09510	4.74643	-2.96822	2.34864	-1.2638	0.2063	0.792271	1.36125	7.14406	17.047	0	0	2.92629
AT1G09520	301.181	-0.293455	1.54718	-0.189671	0.849567	0.99995	333.505	271.474	390.076	443.32	0	368.712
AT1G09530	423.299	0.282628	0.748156	0.377767	0.705604	0.991112	396.123	398.639	351.469	142.034	914.028	337.499
AT1G09540	1.62572	4.84649	3.94811	1.22755	0.219617	NA	0	0	0	0	0	9.75429
AT1G09550	0	NA	NA	NA	NA	NA	0	0	0	0	0	0
AT1G09560	782.432	-1.00108	0.610361	-1.64014	0.100976	0.6398	1282.29	1010.17	837.81	727.389	195.095	641.832
AT1G09570	967.722	1.23985	0.438539	2.82724	0.00469513	0.102039	455.337	715.121	557.036	959.809	1920.23	1198.8
AT1G09575	433.699	-1.00487	0.921526	-1.09044	0.275518	0.825214	539.053	640.822	558.039	34.4326	271.904	557.946
AT1G09580	111.846	0.302182	0.819058	0.368939	0.712173	0.992255	43.5599	110.733	145.902	107.602	213.529	49.7469
AT1G09590	1458.47	-0.131501	0.644607	-0.204002	0.838352	0.99995	1536.85	1653.85	1382.81	2597.51	586.821	992.987
AT1G09600	4.07346	1.0963	3.77304	0.290561	0.771387	0.997537	0	7.85847	0	0	0	16.5823
AT1G09610	9.52408	-1.26997	3.21345	-0.395204	0.692692	0.991112	31.9893	8.57287	0	0	0	16.5823
AT1G09620	588.673	-0.0577228	0.353145	-0.163454	0.870161	0.99995	572.404	627.963	599.152	766.125	517.693	448.697
AT1G09625	0.113437	0.279992	4.08047	0.0686175	0.945294	NA	0.680623	0	0	0	0	0
AT1G09630	142.686	0.0604505	1.55716	0.0388209	0.969033	0.99995	149.737	72.155	197.043	273.309	0	163.872
AT1G09640	745.598	-0.0988348	0.409741	-0.241213	0.80939	0.999308	843.972	739.41	729.511	654.219	1013.88	492.592
AT1G09645	257.554	0.38904	0.420609	0.924945	0.354995	0.869396	181.726	232.182	254.702	365.846	199.704	311.162
AT1G09650	13.0695	2.19704	3.74417	0.586788	0.557346	0.965643	0	0	14.0387	0	0	64.3783
AT1G09660	605.656	0.389855	0.42928	0.908159	0.363794	0.875171	656.121	418.642	499.377	527.249	577.604	954.945
AT1G09665	0	NA	NA	NA	NA	NA	0	0	0	0	0	0
AT1G09680	10.8695	-2.6035	2.0401	-1.27616	0.201899	0.788746	6.12561	15.7169	34.5954	0	0	8.77886
AT1G09690	4174.65	-0.194563	0.551755	-0.352626	0.724369	0.994287	4913.42	4166.42	4285.82	6776.77	2258.19	2647.32
AT1G09700	77.5786	-0.947873	0.820084	-1.15582	0.247753	0.812501	40.1568	142.167	124.343	30.1285	90.6347	38.0417
AT1G09710	117.432	1.52553	0.480402	3.17553	0.00149565	0.0450126	63.9786	64.2966	53.1465	178.619	230.427	114.125
AT1G09720	2.15531	-3.98585	3.91977	-1.01686	0.309221	0.836623	12.9318	0	0	0	0	0
AT1G09730	287.789	0.0188241	0.513603	0.036651	0.970763	0.99995	274.291	273.618	309.854	352.934	144.401	371.639
AT1G09740	182.995	-0.432403	1.52414	-0.283703	0.776638	0.997537	288.584	195.033	146.905	284.069	0	183.381
AT1G09750	384.266	0.153464	0.334791	0.458386	0.646675	0.984549	342.353	356.489	391.078	492.817	411.697	311.162
AT1G09760	245.357	-0.481467	1.56563	-0.307523	0.758445	0.996633	338.95	274.332	244.173	471.296	0	143.388
AT1G09770	729.435	0.317864	0.608662	0.522234	0.601507	0.975369	822.873	523.66	601.157	1258.94	327.207	842.771
AT1G09780	642.852	0.358381	0.463661	0.772936	0.43956	0.922434	721.46	473.651	495.366	522.945	1058.43	585.258
AT1G09790	0	NA	NA	NA	NA	NA	0	0	0	0	0	0
AT1G09794	16.4151	-2.35745	1.97856	-1.1915	0.233459	0.805594	30.628	12.1449	40.1106	0	0	15.6069
AT1G09795	688.787	0.419549	1.6374	0.256228	0.797774	0.998906	611.199	531.518	625.224	1360.09	0	1004.69
AT1G09800	59.5509	-1.50172	1.54463	-0.972222	0.33094	0.846483	76.9104	67.8686	119.83	10.7602	0	81.9361
AT1G09810	106.034	1.12687	1.59021	0.70863	0.478554	0.942882	47.6436	107.161	45.1244	159.251	0	277.022
AT1G09812	16.499	20.6871	3.91094	5.28953	1.23e-07	2.25e-05	0	0	0	98.9937	0	0
AT1G09815	137.426	0.367528	0.754989	0.486799	0.626401	0.98063	38.7955	136.452	184.509	146.339	215.065	103.396
AT1G09820	15.2514	-6.80961	1.87876	-3.62451	0.000289505	0.0133387	31.3087	42.15	18.0498	0	0	0
AT1G09830	114.665	-1.97383	1.37064	-1.44008	0.149844	0.738738	124.554	222.18	201.556	75.3213	0	64.3783
AT1G09840	471.964	-0.298504	0.786999	-0.379294	0.70447	0.991112	425.389	540.805	595.642	583.202	82.9538	603.791
AT1G09850	158.713	-0.992629	0.448582	-2.21282	0.0269103	0.326435	187.852	211.464	232.641	146.339	99.8518	74.1326
AT1G09860	5.44693	-2.38474	2.14744	-1.1105	0.266782	0.822148	14.2931	10.0017	3.50968	0	0	4.87715
AT1G09870	531.942	0.144828	0.647827	0.22356	0.8231	0.99995	369.578	687.973	458.765	578.898	216.602	879.837
AT1G09880	10.1034	-4.58009	1.93277	-2.36971	0.0178023	0.253616	8.8481	39.2923	10.529	0	0	1.95086
AT1G09890	5.64288	-5.37521	3.91174	-1.37412	0.169403	0.757868	23.1412	10.7161	0	0	0	0
AT1G09900	83.8833	0.29589	1.61554	0.183153	0.854678	0.99995	79.6329	56.4381	89.7474	73.1693	204.312	0
AT1G09910	193.174	0.0523882	0.55103	0.0950732	0.924257	0.99995	208.271	158.598	202.057	139.882	319.526	130.708
AT1G09920	293.547	-0.914695	0.892195	-1.02522	0.30526	0.834687	360.73	387.923	402.61	219.508	27.6513	362.86
AT1G09930	19.8518	-1.23646	2.10277	-0.588013	0.556524	0.965643	19.0574	37.8635	27.0746	0	0	35.1155
AT1G09932	155.271	-0.59171	1.54132	-0.383898	0.701054	0.991112	106.177	221.466	232.641	101.146	0	270.194
AT1G09935	0	NA	NA	NA	NA	NA	0	0	0	0	0	0
AT1G09940	1464.48	-0.133919	0.508764	-0.263225	0.792377	0.998906	850.779	2081.78	1665.59	1073.87	1216.66	1898.19
AT1G09950	1648.18	-0.0597308	0.370377	-0.16127	0.87188	0.99995	1236.69	1836.74	1974.44	1226.66	1797.33	1817.22
AT1G09960	11.249	-3.81224	1.67065	-2.28189	0.0224957	0.292766	23.8218	20.7178	19.0525	0	0	3.90172
AT1G09970	2876	-0.556361	0.317778	-1.75079	0.0799827	0.576083	2579.56	4232.14	3459.04	2477	2335	2173.26
AT1G09980	301.306	0.0557583	0.593558	0.0939391	0.925158	0.99995	327.38	291.478	268.24	307.741	132.112	480.887
AT1G09995	152.659	-0.348072	1.01381	-0.34333	0.731351	0.994945	183.088	132.165	198.046	137.73	12.2895	252.636
AT1G10000	84.0524	-1.96417	2.02619	-0.969391	0.33235	0.847753	110.942	135.023	155.93	0	0	102.42
AT1G10010	1.19068	-3.12648	3.93033	-0.795476	0.426337	NA	0	7.14406	0	0	0	0
AT1G10020	725.187	0.414108	0.625129	0.662437	0.507691	0.952973	409.735	734.41	721.489	426.103	1451.69	607.692
AT1G10030	167.885	0.605873	0.526716	1.15028	0.250028	0.812501	106.177	139.309	152.922	277.613	218.138	113.15
AT1G10040	21.4066	-3.11338	1.76692	-1.76204	0.0780633	0.569429	44.2405	41.4356	30.0829	0	0	12.6806
AT1G10050	105.017	0.417743	0.748455	0.558141	0.576748	0.970626	90.5229	66.4398	113.312	36.5846	172.052	151.192
AT1G10060	36.9488	-1.81379	2.18365	-0.830622	0.406187	0.904868	104.135	21.4322	46.6286	49.4969	0	0
AT1G10070	306.475	-0.876401	1.54065	-0.568851	0.569457	0.967948	438.321	537.948	214.09	352.934	0	295.555
AT1G10090	442.291	-0.822725	0.680726	-1.2086	0.226817	0.801018	451.934	740.839	503.889	208.748	147.473	600.864
AT1G10095	184.754	2.13527	0.567435	3.76302	0.000167877	0.00872785	85.7585	62.1533	58.1604	197.987	219.674	484.788
AT1G10100	2.5897	2.18033	3.81967	0.570816	0.568125	0.967857	0	2.85762	0	0	0	12.6806
AT1G10110	1.13222	-3.05852	3.93146	-0.777961	0.436592	NA	0	4.28644	2.50691	0	0	0
AT1G10120	143.811	0.121851	1.30192	0.0935938	0.925432	0.99995	109.58	137.166	166.96	2.15204	118.286	328.72
AT1G10130	482.935	0.106653	0.498493	0.213951	0.830586	0.99995	384.552	561.523	448.236	591.81	645.196	266.292
AT1G10140	681.6	0.466663	0.718539	0.649461	0.51604	0.955895	543.818	730.838	442.721	256.092	1465.52	650.611
AT1G10150	494.365	0.518696	0.600431	0.863872	0.387658	0.892221	426.751	414.356	378.042	432.56	1027.71	286.776
AT1G10155	12.1435	1.20571	2.56884	0.469361	0.638812	0.983561	0.680623	11.4305	10.0276	0	0	50.7223
AT1G10160.1	53.7137	-1.38649	2.07317	-0.668778	0.503637	0.951669	85.0779	70.7262	77.7143	0	0	88.7641
AT1G10170	310.754	-0.107619	0.691874	-0.155547	0.87639	0.99995	309.003	395.781	262.223	178.619	574.532	144.364
AT1G10180	185.201	1.08437	1.02852	1.0543	0.291746	0.831166	154.501	117.877	83.2295	583.202	138.256	34.14
AT1G10190	0	NA	NA	NA	NA	NA	0	0	0	0	0	0
AT1G10200	799.244	0.151917	0.58356	0.260328	0.79461	0.998906	695.597	673.685	902.488	449.776	1470.13	603.791
AT1G10210	63.9521	-0.839298	1.43792	-0.58369	0.559429	0.966159	99.371	58.5813	88.2433	62.4091	0	75.1081
AT1G10220	5.56799	-5.35784	2.55247	-2.09908	0.03581	0.382687	14.2931	3.57203	15.5429	0	0	0
AT1G10230	37.4759	-0.68717	2.17305	-0.316224	NA	NA	23.1412	60.7245	55.1521	0	0	85.8378
AT1G10240	108.068	1.92981	1.60446	1.20278	0.229062	0.802157	51.0467	30.0051	53.6479	361.542	0	152.167
AT1G10250	0	NA	NA	NA	NA	NA	0	0	0	0	0	0
AT1G10260.1	0	NA	NA	NA	NA	NA	0	0	0	0	0	0
AT1G10270	42.1958	1.51035	2.25913	0.668556	0.503779	0.951669	0	37.1491	28.5788	126.97	0	60.4766
AT1G10280	78.9349	0.872534	1.56083	0.55902	0.576148	0.970626	67.3817	29.2907	70.6949	0	235.036	71.2063
AT1G10290	386.454	-0.67047	0.382595	-1.75243	0.0797004	0.575132	456.698	585.813	383.056	225.964	317.99	349.204
AT1G10300	0.280565	-1.05941	4.00442	-0.264561	0.791348	NA	0.680623	0	1.00276	0	0	0
AT1G10310	543.63	-0.158051	0.252202	-0.626685	0.530866	0.960796	593.503	615.818	510.909	499.273	554.562	487.715
AT1G10320	299.242	0.844081	0.648932	1.30072	0.193353	0.780904	353.924	195.747	93.2571	320.654	304.164	527.707
AT1G10330	5.77757	-5.41219	2.79034	-1.93962	0.052426	0.471199	8.16748	1.42881	25.0691	0	0	0
AT1G10340	107.22	0.724201	1.56394	0.463062	0.64332	0.984134	122.512	67.8686	52.1438	238.876	0	161.921
AT1G10350	143.089	-1.36488	1.42988	-0.954542	0.339809	0.855766	255.234	195.747	167.462	116.21	0	123.88
AT1G10360	637.391	-0.468116	0.956816	-0.489243	0.62467	0.98063	745.963	629.392	844.328	770.429	46.0855	788.147
AT1G10370	1359.72	0.173717	0.546741	0.317731	0.750689	0.996427	1536.17	1060.18	1236.41	1915.31	1774.29	635.98
AT1G10380	51.8383	2.10966	1.71667	1.22893	0.2191	0.796135	34.7118	4.28644	19.5539	81.7774	0	170.7
AT1G10385	0	NA	NA	NA	NA	NA	0	0	0	0	0	0
AT1G10390	444.32	0.924453	0.572773	1.614	0.106528	0.650479	291.307	357.918	270.746	391.671	1003.13	351.155
AT1G10400	41.9912	1.57895	1.2287	1.28506	0.198771	0.78629	25.183	15.0025	23.0636	4.30408	144.401	39.9926
AT1G10410	367.393	-0.0785987	0.286707	-0.274143	0.783975	0.998603	417.222	376.492	338.935	322.806	405.552	343.351
AT1G10417	34.5623	-1.61088	2.03695	-0.790831	0.429043	0.918161	49.6855	44.2932	62.6728	0	0	50.7223
AT1G10419	0	NA	NA	NA	NA	NA	0	0	0	0	0	0
AT1G10430	308.42	-0.41087	1.54738	-0.265527	0.790604	0.998906	336.228	336.485	383.558	294.829	0	499.42
AT1G10440	0	NA	NA	NA	NA	NA	0	0	0	0	0	0
AT1G10450	34.9456	0.269606	1.7106	0.15761	0.874764	0.99995	17.0156	22.1466	56.1548	12.9122	0	101.445
AT1G10455	0	NA	NA	NA	NA	NA	0	0	0	0	0	0
AT1G10460	4.51331	-5.05245	3.91298	-1.2912	0.196634	0.785069	1.36125	25.7186	0	0	0	0
AT1G10470	1426.58	0.145788	0.457653	0.318556	0.750064	0.996427	1027.06	1436.67	1600.91	875.879	1889.5	1729.44
AT1G10480	0.709779	-0.724564	3.96201	-0.182878	0.854894	NA	2.72249	0	0	0	1.53618	0
AT1G10490	45.6397	-1.55401	1.41085	-1.10147	0.270691	0.823131	85.7585	86.4432	32.0885	34.4326	0	35.1155
AT1G10500	267.364	-0.40771	0.338834	-1.20327	0.22887	0.802098	279.736	267.188	366.511	264.701	221.21	204.84
AT1G10510	249.852	-0.338955	0.477147	-0.710379	0.477469	0.942507	333.505	305.051	200.052	142.034	236.572	281.899
AT1G10520	9.90675	-0.393694	3.26102	-0.120727	0.903907	0.99995	0	18.5746	15.0415	25.8245	0	0
AT1G10522	295.335	-0.013874	0.519777	-0.0266921	0.978705	0.99995	310.364	347.916	232.641	170.011	440.884	270.194
AT1G10530	9.40934	-6.1154	2.24482	-2.72423	0.00644518	0.127603	11.5706	9.28728	35.5982	0	0	0
AT1G10538	0	NA	NA	NA	NA	NA	0	0	0	0	0	0
AT1G10540	0.226874	-0.725537	4.0294	-0.180061	0.857105	NA	1.36125	0	0	0	0	0
AT1G10550	171.944	-0.0723144	0.473845	-0.152612	0.878704	0.99995	140.889	218.608	168.966	152.795	230.427	119.978
AT1G10560	303.521	-1.5249	1.63762	-0.931166	0.351768	0.866476	263.401	477.938	610.684	40.8887	0	428.213
AT1G10570	558.718	-0.404185	0.697747	-0.579272	0.562406	0.966442	918.841	471.508	520.435	228.116	307.236	906.174
AT1G10580	483.551	0.419259	0.284456	1.4739	0.14051	0.722909	398.845	395.781	446.23	527.249	651.341	481.862
AT1G10585	88.7105	-0.489863	2.29039	-0.213878	NA	NA	134.083	42.15	134.37	221.66	0	0
AT1G10586	0.453749	-1.73222	3.96835	-0.436509	0.662467	NA	2.72249	0	0	0	0	0
AT1G10588	0.507439	-1.90231	3.96156	-0.480192	0.631091	NA	2.04187	0	1.00276	0	0	0
AT1G10590	1699.71	-0.130553	0.526783	-0.247831	0.804265	0.998906	1673.65	1716	1939.85	2136.97	720.469	2011.34
AT1G10600	311.074	0.103634	0.451449	0.229559	0.818434	0.99995	215.077	358.632	324.896	443.32	261.151	263.366
AT1G10610	204.427	1.09493	0.386105	2.83584	0.00457049	0.0999814	149.737	113.591	127.853	234.572	357.93	242.882
AT1G10620	0.46501	-1.76524	3.96697	-0.444984	0.656332	NA	1.36125	1.42881	0	0	0	0
AT1G10630	1009.45	-0.650875	0.37916	-1.71662	0.0860481	0.599464	1144.13	1173.77	1381.31	1002.85	528.447	826.189
AT1G10640	41.2072	-1.02581	2.24661	-0.456601	0.647958	0.98458	40.8374	27.8618	96.7668	81.7774	0	0
AT1G10650	146.141	-0.952145	1.4168	-0.67204	0.501558	0.951669	177.643	207.178	193.534	0	195.095	103.396
AT1G10652	0	NA	NA	NA	NA	NA	0	0	0	0	0	0
AT1G10657	27.7494	-6.67957	1.67186	-3.9953	6.46e-05	0.00408914	19.7381	57.8669	86.7392	2.15204	0	0
AT1G10660	298.414	-0.607653	0.508018	-1.19612	0.231649	0.802851	313.087	378.635	387.569	344.326	238.108	128.757
AT1G10670	2009.73	0.184423	0.42704	0.431865	0.66584	0.987911	1868.31	1726.72	2048.15	3070.96	1353.38	1990.85
AT1G10680	0.66851	-2.31197	3.9481	-0.585592	0.55815	NA	0	0	4.01106	0	0	0
AT1G10682	53.3671	0.981437	1.56631	0.626592	0.530927	0.960796	53.0886	20.0034	34.5954	92.5376	0	119.978
AT1G10690	56.388	-0.405769	1.50229	-0.270101	0.787082	0.998906	67.3817	66.4398	58.6617	109.754	0	36.0909
AT1G10700	933.297	-0.0337136	0.431265	-0.0781738	0.93769	0.99995	963.762	1035.89	832.796	766.125	1356.45	644.759
AT1G10705	0	NA	NA	NA	NA	NA	0	0	0	0	0	0
AT1G10710	4.17773	5.19257	3.92356	1.32343	0.185691	0.770564	0.680623	0	0	0	0	24.3857
AT1G10717	0	NA	NA	NA	NA	NA	0	0	0	0	0	0
AT1G10720	305.652	-0.560611	1.33739	-0.419182	0.675083	0.98983	346.437	426.501	319.882	408.887	1.53618	330.671
AT1G10730	33.6826	-1.11758	1.46978	-0.760368	0.447035	0.924624	49.0049	20.0034	69.1908	36.5846	0	27.312
AT1G10740	543.814	-0.353217	0.769913	-0.458776	0.646395	0.984549	541.776	535.805	752.575	645.611	101.388	685.727
AT1G10745	0	NA	NA	NA	NA	NA	0	0	0	0	0	0
AT1G10747	0.835637	-2.63134	3.93993	-0.667865	0.50422	NA	0	0	5.01382	0	0	0
AT1G10750	0	NA	NA	NA	NA	NA	0	0	0	0	0	0
AT1G10760	784.962	0.445023	0.245915	1.80966	0.0703481	0.541989	701.722	613.675	677.869	1017.91	869.479	829.115
AT1G10770	0	NA	NA	NA	NA	NA	0	0	0	0	0	0
AT1G10780	5.00927	-4.2214	3.90881	-1.07997	0.280155	0.82868	0	0	29.0802	0	0	0.975429
AT1G10790	0	NA	NA	NA	NA	NA	0	0	0	0	0	0
AT1G10800	0	NA	NA	NA	NA	NA	0	0	0	0	0	0
AT1G10810	27.4439	0.909451	2.36593	0.384394	0.700686	0.991112	17.0156	25.0042	15.0415	107.602	0	0
AT1G10820	264.374	0.525018	0.960146	0.54681	0.584509	0.971723	233.454	262.901	154.426	34.4326	579.141	321.892
AT1G10830	392.554	-0.959039	1.56958	-0.611015	0.54119	0.962506	439.682	452.934	662.326	600.418	0	199.963
AT1G10840	740.83	-0.295352	1.61351	-0.183049	0.854759	0.99995	839.208	793.705	816.251	1065.26	0	930.56
AT1G10850	96.3851	-2.49993	1.56373	-1.5987	0.109888	0.660121	104.816	132.165	253.699	81.7774	0	5.85258
AT1G10865	342.798	0.0530433	0.471774	0.112433	0.91048	0.99995	240.941	454.362	313.865	333.566	462.391	251.661
AT1G10870	151.053	-1.00282	1.47269	-0.680941	0.495909	0.950023	179.004	264.33	161.445	116.21	0	185.332
AT1G10880	0	NA	NA	NA	NA	NA	0	0	0	0	0	0
AT1G10890	1864.7	0.340565	0.522579	0.6517	0.514595	0.955308	1779.83	1550.98	1606.93	959.809	3013.99	2276.65
AT1G10900	544.984	-0.238508	1.33985	-0.17801	0.858715	0.99995	747.324	450.79	572.077	331.414	4.60855	1163.69
AT1G10910	454.634	0.314712	0.355518	0.88522	0.376038	0.882699	427.431	448.647	340.94	447.624	419.378	643.783
AT1G10920	226.757	-0.442047	1.52363	-0.290127	0.771719	0.997537	202.826	283.619	297.32	243.18	0	333.597
AT1G10930	31.9909	-5.35367	1.55057	-3.45272	0.000554975	0.0214447	74.1879	94.3016	19.5539	0	0	3.90172
AT1G10940	929.863	0.35885	0.299929	1.19645	0.23152	0.802721	912.715	756.556	776.641	893.096	966.258	1273.91
AT1G10950	949.644	-0.400006	0.263533	-1.51786	0.12905	0.69857	913.396	1105.9	1221.87	791.95	875.624	789.122
AT1G10960	3572.07	-0.368896	0.602585	-0.612189	0.540413	0.961783	4824.94	3612.75	3639.53	5649.1	2112.25	1593.85
AT1G10970	11.4135	7.63769	3.76279	2.0298	0.0423771	0.422001	0	0	0	2.15204	0	66.3292
AT1G10980	0	NA	NA	NA	NA	NA	0	0	0	0	0	0
AT1G10990	17.0454	-6.00671	1.5844	-3.79114	0.000149955	0.00813413	26.5443	37.1491	37.6037	0	0	0.975429
AT1G11000	172.901	-1.94718	1.45204	-1.341	0.179921	0.768392	249.108	387.923	187.517	0	35.3322	177.528
AT1G11010	0	NA	NA	NA	NA	NA	0	0	0	0	0	0
AT1G11020	185.996	-0.356178	1.5878	-0.224321	0.822507	0.99995	142.931	206.463	276.763	398.127	0	91.6904
AT1G11030	0	NA	NA	NA	NA	NA	0	0	0	0	0	0
AT1G11040	0	NA	NA	NA	NA	NA	0	0	0	0	0	0
AT1G11050	374.541	-0.182954	0.88508	-0.206709	0.836237	0.99995	328.741	370.062	496.369	355.086	52.2302	644.759
AT1G11055	0	NA	NA	NA	NA	NA	0	0	0	0	0	0
AT1G11060	104.794	-0.856521	1.54422	-0.554662	0.579126	0.970739	193.297	102.874	109.301	40.8887	0	182.405
AT1G11070	3.67594	-4.76082	3.15169	-1.51056	0.1309	0.701621	1.36125	2.14322	18.5511	0	0	0
AT1G11080	0.589708	-2.10878	3.9543	-0.533288	0.593834	NA	0.680623	2.85762	0	0	0	0
AT1G11090	111.576	-0.866275	1.42727	-0.606944	0.543888	0.963215	87.8004	175.03	169.969	0	84.49	152.167
AT1G11100	6.52785	-5.58553	3.91106	-1.42814	0.153253	0.742019	31.3087	7.85847	0	0	0	0
AT1G11110	0	NA	NA	NA	NA	NA	0	0	0	0	0	0
AT1G11112	2.38135	-4.12888	3.91855	-1.05368	0.292032	0.831166	0	14.2881	0	0	0	0
AT1G11120	23.3759	0.0140316	2.26444	0.00619652	0.995056	0.99995	10.89	38.5779	20.5567	0	0	70.2309
AT1G11125	0	NA	NA	NA	NA	NA	0	0	0	0	0	0
AT1G11130	32.948	-1.78974	2.00812	-0.89125	0.372795	0.880306	54.4498	55.7237	43.6203	0	0	43.8943
AT1G11145	0	NA	NA	NA	NA	NA	0	0	0	0	0	0
AT1G11150.1	41.7274	-4.80332	1.47408	-3.25851	0.00111999	0.0360414	115.706	80.7279	46.1272	0	0	7.80343
AT1G11160	6.31924	-5.53963	3.9112	-1.41635	0.156673	0.747887	0	17.8602	20.0553	0	0	0
AT1G11170	41.0168	1.46758	1.66474	0.881568	0.37801	0.884463	42.8792	15.0025	7.52074	86.0815	0	94.6166
AT1G11175	376.77	-0.215433	0.598249	-0.360106	0.718768	0.992963	451.934	468.65	294.813	152.795	531.519	360.909
AT1G11180	360.475	0.0639231	0.635707	0.100554	0.919904	0.99995	322.615	353.631	382.053	126.97	537.664	439.919
AT1G11185	45.8902	2.54996	1.09436	2.3301	0.0198011	0.270354	4.76436	9.28728	26.0719	17.2163	92.1709	125.83
AT1G11190	23.1448	-4.23964	3.78754	-1.11936	NA	NA	132.041	0	0	0	0	6.82801
AT1G11200	233.264	-2.00373	2.17788	-0.920037	0.357553	0.870936	345.756	386.494	387.569	279.765	0	0
AT1G11210	889.339	-0.0530009	0.559921	-0.0946579	0.924587	0.99995	831.721	742.982	1143.65	488.513	672.848	1456.32
AT1G11220	0.113437	0.279992	4.08047	0.0686175	0.945294	NA	0.680623	0	0	0	0	0
AT1G11230	0	NA	NA	NA	NA	NA	0	0	0	0	0	0
AT1G11240	148.449	0.162524	1.53182	0.106099	0.915504	0.99995	133.402	172.172	114.817	189.379	0	280.924
AT1G11250	0	NA	NA	NA	NA	NA	0	0	0	0	0	0
AT1G11260	4156.13	0.797005	0.538195	1.48088	0.138637	0.718159	1836.32	4009.25	3264.5	2836.39	6534.92	6455.39
AT1G11265.1	3.0066	2.45774	2.71316	0.90586	0.36501	0.875727	0.680623	2.14322	0	0	12.2895	2.92629
AT1G11270	212.199	1.28381	0.481183	2.66803	0.0076298	0.145031	159.946	91.444	119.83	195.835	347.177	358.958
AT1G11280	142.943	0.227307	1.03679	0.219242	0.826462	0.99995	148.376	126.45	120.833	10.7602	207.385	243.857
AT1G11290	69.0649	0.299555	1.49139	0.200856	0.840811	0.99995	72.8267	61.4389	51.6424	0	168.98	59.5012
AT1G11300	147.311	-1.6131	1.3931	-1.15792	0.246895	0.812396	125.235	271.474	269.744	0	141.329	76.0835
AT1G11310	1488.08	-1.03776	0.314577	-3.2989	0.000970636	0.0325977	1920.04	2000.34	2086.25	742.453	970.867	1208.56
AT1G11320	6.26381	-5.5285	2.48371	-2.2259	0.0260206	0.321265	5.44498	8.57287	23.565	0	0	0
AT1G11330	127.693	0.313039	1.52409	0.205393	0.837265	0.99995	147.695	80.0135	114.315	0	109.069	315.064
AT1G11340	21.239	-3.99913	1.65534	-2.41589	0.0156967	0.234446	66.0204	25.0042	29.5816	0	0	6.82801
AT1G11350	303.527	-1.52944	0.949124	-1.61143	0.107087	0.65178	319.212	484.367	549.515	19.3683	317.99	130.708
AT1G11360	600.365	-0.418458	0.557008	-0.751261	0.452495	0.928367	615.964	745.84	697.423	852.207	259.615	431.14
AT1G11362	2.88706	-4.41109	3.91646	-1.12629	0.260041	0.817621	0	4.28644	13.0359	0	0	0
AT1G11370	0.595339	-2.12181	3.95388	-0.536641	0.591516	NA	0	3.57203	0	0	0	0
AT1G11380	442.742	0.622534	0.305944	2.0348	0.0418712	0.4177	295.39	353.631	397.095	473.448	616.009	520.879
AT1G11390	130.854	0.0697753	1.5161	0.0460228	0.963292	0.99995	102.774	156.455	123.841	200.139	0	201.914
AT1G11400	300.524	0.516042	0.540364	0.954989	0.339583	0.855626	389.316	131.451	221.11	380.911	348.713	331.646
AT1G11410	202.129	-2.89155	1.32195	-2.18734	0.0287179	0.337334	257.956	377.921	432.693	81.7774	0	62.4275
AT1G11420	0.833474	-2.60989	3.94042	-0.662336	0.507756	NA	0	5.00084	0	0	0	0
AT1G11430	1611.73	0.169348	0.512914	0.330169	0.741272	0.995744	1593.34	1672.42	1284.54	2765.37	1354.91	999.815
AT1G11440	239.391	-0.508555	1.52551	-0.333366	0.738858	0.995744	323.296	199.319	320.885	269.005	0	323.843
AT1G11450	3.76037	-4.7929	3.91421	-1.22449	0.220768	0.796943	0	0	22.5622	0	0	0
AT1G11460	2.35184	-1.33057	3.84638	-0.345927	0.729397	0.994843	10.2093	0	0	0	0	3.90172
AT1G11470	6.53283	2.85022	3.77444	0.755138	0.450166	0.92739	4.76436	0	0	34.4326	0	0
AT1G11475	391.392	0.637383	0.290318	2.19547	0.0281302	0.333761	364.133	279.333	275.259	499.273	477.753	452.599
AT1G11480	611.629	0.691914	0.427842	1.61722	0.105832	0.649582	514.551	447.218	441.718	520.793	1096.83	648.661
AT1G11482	13.111	-2.90694	1.82452	-1.59326	0.111101	0.663031	55.1305	1.42881	13.0359	0	6.14473	2.92629
AT1G11490	1.58771	-3.55232	3.92432	-0.905207	0.365356	NA	0	0	9.52627	0	0	0
AT1G11500	0.975429	4.12398	3.97459	1.03759	0.299462	NA	0	0	0	0	0	5.85258
AT1G11510	0	NA	NA	NA	NA	NA	0	0	0	0	0	0
AT1G11520	0	NA	NA	NA	NA	NA	0	0	0	0	0	0
AT1G11530	512.2	0.0375987	0.605626	0.0620823	0.950497	0.99995	360.73	568.667	586.116	884.487	259.615	413.582
AT1G11540	4.95797	-5.19163	3.05087	-1.70169	0.0888134	0.604862	0.680623	5.00084	24.0664	0	0	0
AT1G11545	238.977	-1.12077	1.53057	-0.732256	0.464012	0.935492	132.721	415.784	433.696	219.508	0	232.152
AT1G11550	0	NA	NA	NA	NA	NA	0	0	0	0	0	0
AT1G11560	0	NA	NA	NA	NA	NA	0	0	0	0	0	0
AT1G11570	0	NA	NA	NA	NA	NA	0	0	0	0	0	0
AT1G11572	0	NA	NA	NA	NA	NA	0	0	0	0	0	0
AT1G11580	150.351	-0.537516	0.643717	-0.83502	0.403707	0.903329	302.197	95.7304	136.376	96.8417	159.763	111.199
AT1G11590	0	NA	NA	NA	NA	NA	0	0	0	0	0	0
AT1G11592	143.984	0.82165	0.73789	1.11351	0.265488	0.820664	142.25	109.304	60.1659	262.549	224.283	65.3538
AT1G11593	0	NA	NA	NA	NA	NA	0	0	0	0	0	0
AT1G11595	0	NA	NA	NA	NA	NA	0	0	0	0	0	0
AT1G11600	0	NA	NA	NA	NA	NA	0	0	0	0	0	0
AT1G11608	0	NA	NA	NA	NA	NA	0	0	0	0	0	0
AT1G11610	0	NA	NA	NA	NA	NA	0	0	0	0	0	0
AT1G11620	0	NA	NA	NA	NA	NA	0	0	0	0	0	0
AT1G11630	119.765	2.03075	0.862045	2.35573	0.0184863	0.260396	48.3242	68.583	24.5677	79.6254	390.19	107.297
AT1G11640	0	NA	NA	NA	NA	NA	0	0	0	0	0	0
AT1G11650	2429.67	0.0754035	0.348835	0.216158	0.828865	0.99995	2772.18	2275.38	2049.65	3264.64	2079.99	2136.19
AT1G11655	0	NA	NA	NA	NA	NA	0	0	0	0	0	0
AT1G11660	156.675	0.0866573	1.54	0.056271	0.955126	0.99995	191.255	103.589	160.944	296.981	0	187.282
AT1G11670	1272.56	-0.457073	0.598768	-0.763355	0.445252	0.923961	1627.37	1750.3	1041.37	464.84	1041.53	1709.93
AT1G11680	913.624	-0.462474	1.01545	-0.455437	0.648795	0.984844	1404.81	835.141	936.081	1482.75	55.3025	767.663
AT1G11684	0	NA	NA	NA	NA	NA	0	0	0	0	0	0
AT1G11690	0	NA	NA	NA	NA	NA	0	0	0	0	0	0
AT1G11700	58.4061	2.2166	1.60941	1.37727	0.168428	0.757023	30.628	21.4322	10.0276	142.034	0	146.314
AT1G11710	9.00522	1.51252	3.74823	0.403528	0.68656	0.991112	0	0	14.0387	0	0	39.9926
AT1G11720	626.388	-0.416385	0.321764	-1.29407	0.195642	0.78448	890.255	697.26	561.047	553.074	519.229	537.462
AT1G11730	12.3583	0.621487	3.21552	0.193277	0.846742	0.99995	0	5.71525	23.565	0	0	44.8697
AT1G11735	0	NA	NA	NA	NA	NA	0	0	0	0	0	0
AT1G11740	82.2115	0.931995	0.82115	1.13499	0.256381	0.814706	52.408	64.2966	52.6452	109.754	185.878	28.2875
AT1G11750	2448.51	-0.0500566	0.44276	-0.113056	0.909986	0.99995	2589.09	2386.12	2495.88	3578.84	2150.65	1490.46
AT1G11755	53.4719	-2.00816	1.99952	-1.00432	0.315224	0.838105	102.093	63.5822	91.753	0	0	63.4029
AT1G11760	109.435	-1.12747	2.13853	-0.527218	NA	NA	174.239	108.59	167.963	0	0	205.816
AT1G11765	0	NA	NA	NA	NA	NA	0	0	0	0	0	0
AT1G11770	8.34819	1.23807	3.74897	0.330241	0.741218	0.995744	14.9737	0	0	0	0	35.1155
AT1G11780	194.094	-0.88286	0.447487	-1.97293	0.0485037	0.453959	216.438	303.623	236.652	90.3856	142.865	174.602
AT1G11785	1.22271	-3.17265	3.92959	-0.807375	0.41945	NA	0.680623	2.14322	4.51244	0	0	0
AT1G11790	459.244	-0.762747	0.612991	-1.2443	0.213388	0.795211	543.818	603.673	585.113	400.279	497.723	124.855
AT1G11800	104.718	1.19468	1.04734	1.14068	0.254004	0.814509	43.5599	76.4415	71.1963	15.0643	301.092	120.953
AT1G11803	0	NA	NA	NA	NA	NA	0	0	0	0	0	0
AT1G11806	0	NA	NA	NA	NA	NA	0	0	0	0	0	0
AT1G11810	0	NA	NA	NA	NA	NA	0	0	0	0	0	0
AT1G11820	206.739	-0.826971	1.48606	-0.556486	0.577879	0.970626	275.652	249.328	268.24	234.572	0	212.644
AT1G11840	2569.09	-0.15527	0.402687	-0.385584	0.699805	0.991112	3252.7	2191.8	2677.88	2438.26	1654.47	3199.41
AT1G11850	4.80166	-5.14498	2.6722	-1.92537	0.054183	0.481798	3.40311	7.85847	17.5484	0	0	0
AT1G11860	11901.9	0.129621	0.455533	0.284548	0.775991	0.997537	12680.7	9710.21	11710.8	18578.5	7605.64	11125.7
AT1G11870	215.366	-0.588336	1.51298	-0.388858	0.697381	0.991112	256.595	221.466	297.821	316.35	0	199.963
AT1G11880	53.8649	-0.51863	1.46416	-0.354217	0.723177	0.994088	44.2405	86.4432	59.6645	64.5611	0	68.2801
AT1G11890	589.815	-0.350079	0.654599	-0.534799	0.592789	0.973687	600.99	689.402	693.913	357.238	225.819	971.528
AT1G11900	50.4314	-1.11366	1.40017	-0.795371	0.426397	0.917323	80.3135	67.8686	58.6617	53.8009	0	41.9435
AT1G11905	112.424	-0.159813	1.54283	-0.103585	0.917499	0.99995	99.371	63.5822	193.032	131.274	0	187.282
AT1G11910	2305.96	0.238008	0.410342	0.580024	0.561899	0.966405	2349.51	1888.89	2108.81	3010.7	2967.9	1509.96
AT1G11915	0	NA	NA	NA	NA	NA	0	0	0	0	0	0
AT1G11920	0	NA	NA	NA	NA	NA	0	0	0	0	0	0
AT1G11925	0	NA	NA	NA	NA	NA	0	0	0	0	0	0
AT1G11930	780.409	-0.722695	0.479581	-1.50693	0.131829	0.703247	1145.49	900.866	868.896	781.19	314.917	671.095
AT1G11940	98.5768	0.0652765	1.57629	0.0414115	0.966968	0.99995	30.628	103.589	154.927	0	224.283	78.0343
AT1G11950	95.9115	2.83001	0.698898	4.04924	5.14e-05	0.00345136	12.2512	23.5754	35.0968	92.5376	172.052	239.956
AT1G11960	1381.66	0.700549	0.787251	0.889868	0.373537	0.880516	734.392	1374.52	1049.89	434.712	1359.52	3336.94
AT1G11970	0	NA	NA	NA	NA	NA	0	0	0	0	0	0
AT1G11980	0	NA	NA	NA	NA	NA	0	0	0	0	0	0
AT1G11990	51.4295	-1.10555	2.16148	-0.511478	NA	NA	90.5229	96.4448	24.0664	0	0	97.5429
AT1G12000	615.6	-0.175558	0.29626	-0.592581	0.553462	0.965643	632.299	759.414	566.562	664.98	519.229	551.118
AT1G12010	18.3599	-1.01773	3.15149	-0.322935	0.746745	0.995872	58.5336	0	15.0415	36.5846	0	0
AT1G12013	0	NA	NA	NA	NA	NA	0	0	0	0	0	0
AT1G12015	0	NA	NA	NA	NA	NA	0	0	0	0	0	0
AT1G12020	28.6117	-4.46238	1.75647	-2.54053	0.0110684	0.186016	76.2298	78.5847	10.0276	0	0	6.82801
AT1G12030	14.6363	1.22754	3.33426	0.368159	0.712755	0.992307	1.36125	25.0042	0	0	0	61.452
AT1G12040	0.453749	-1.73222	3.96835	-0.436509	0.662467	NA	2.72249	0	0	0	0	0
AT1G12050	501.246	0.402933	0.583826	0.69016	0.490094	0.947886	439.682	350.773	504.391	421.799	981.62	309.211
AT1G12060	105.57	-0.00611574	0.797413	-0.00766948	0.993881	0.99995	109.58	90.7296	116.822	75.3213	205.848	35.1155
AT1G12064	0	NA	NA	NA	NA	NA	0	0	0	0	0	0
AT1G12070	0.113437	0.279992	4.08047	0.0686175	0.945294	NA	0.680623	0	0	0	0	0
AT1G12080	625.084	1.30728	0.589133	2.21899	0.0264871	0.323792	150.418	477.938	451.244	705.868	811.104	1153.93
AT1G12090	13282.4	0.0667414	0.373002	0.17893	0.857992	0.99995	8974.69	13464.4	16485.5	15940.1	13206.6	11623.2
AT1G12100	4.65229	-5.09857	3.91279	-1.30305	0.192556	0.780756	0	7.85847	20.0553	0	0	0
AT1G12110	207.351	-1.47424	1.46772	-1.00444	0.315166	0.838105	209.632	314.339	391.078	118.362	0	210.693
AT1G12120	568.079	-0.238725	0.478332	-0.499077	0.617725	0.978665	652.037	644.394	547.008	813.47	348.713	402.852
AT1G12130	0.334255	-1.32401	3.98825	-0.331978	0.739906	NA	0	0	2.00553	0	0	0
AT1G12140	320.326	0.256316	0.989311	0.259085	0.795569	0.998906	345.076	282.19	248.184	686.5	32.2598	327.744
AT1G12150	21.1678	-1.53398	2.05351	-0.747003	0.455062	0.92959	40.1568	23.5754	31.0857	0	0	32.1892
AT1G12160	0	NA	NA	NA	NA	NA	0	0	0	0	0	0
AT1G12170	0	NA	NA	NA	NA	NA	0	0	0	0	0	0
AT1G12180	0	NA	NA	NA	NA	NA	0	0	0	0	0	0
AT1G12190	0	NA	NA	NA	NA	NA	0	0	0	0	0	0
AT1G12200	38.4908	2.82132	1.67317	1.68621	0.0917556	0.613011	15.6543	5.00084	8.02212	55.953	0	146.314
AT1G12210	5.59354	-5.36204	2.47993	-2.16217	0.0306048	0.351656	14.9737	13.5737	5.01382	0	0	0
AT1G12211	0.202631	-0.578438	4.04231	-0.143096	0.886214	NA	0	0.714406	0.501382	0	0	0
AT1G12220	105.008	0.371783	0.448439	0.829061	0.40707	0.905673	66.7011	107.161	101.279	96.8417	124.431	133.634
AT1G12230	1042.08	0.118995	0.281911	0.4221	0.672952	0.989408	1052.24	1079.47	866.89	910.312	1222.8	1120.77
AT1G12240	1244.58	-0.345625	0.585162	-0.590649	0.554756	0.965643	1181.56	1523.83	1474.57	421.799	1546.94	1318.78
AT1G12244	327.401	-0.177627	1.55617	-0.114144	0.909123	0.99995	343.715	325.769	373.029	522.945	0	398.951
AT1G12250	968.248	-0.0379361	0.292528	-0.129684	0.896817	0.99995	1204.7	844.428	894.466	906.008	938.607	1021.27
AT1G12260	4.20281	-4.95005	3.91344	-1.26489	0.205912	0.792271	24.5024	0.714406	0	0	0	0
AT1G12270	396.513	-0.223416	0.494612	-0.4517	0.651485	0.985382	401.568	467.222	414.142	187.227	427.059	481.862
AT1G12280	36.9098	-0.955288	0.955929	-0.999329	0.317635	0.838898	26.5443	57.1525	62.6728	27.9765	6.14473	40.968
AT1G12290	38.1627	-0.0493363	1.22134	-0.0403953	0.967778	0.99995	21.7799	29.2907	65.6811	2.15204	58.3749	51.6978
AT1G12294	0	NA	NA	NA	NA	NA	0	0	0	0	0	0
AT1G12300	96.9792	1.59996	1.77952	0.899097	NA	NA	63.2979	55.0093	26.0719	0	420.914	16.5823
AT1G12310	612.601	-0.320548	0.438305	-0.731336	0.464574	0.935492	765.701	568.667	704.944	791.95	463.927	380.417
AT1G12320	79.0611	-1.21611	2.23324	-0.54455	0.586063	0.971723	177.643	16.4313	137.88	0	0	142.413
AT1G12330	114.86	-1.65909	1.4295	-1.16061	0.245801	0.811255	163.35	180.745	179.495	0	138.256	27.312
AT1G12340	2.97669	-4.45129	3.91619	-1.13664	0.25569	0.814706	0	17.8602	0	0	0	0
AT1G12350	533.095	0.785456	0.664597	1.18185	0.237264	0.80634	457.379	332.199	385.062	271.157	1239.7	513.076
AT1G12360	662.317	0.0556004	0.352985	0.157515	0.874839	0.99995	481.881	802.278	665.334	587.506	678.992	757.909
AT1G12370	94.5021	-0.0290275	1.58478	-0.0183164	0.985386	0.99995	133.402	56.4381	96.2654	144.187	136.72	0
AT1G12380	16.596	-1.72042	1.60166	-1.07415	0.282757	0.82868	25.8637	25.0042	26.0719	2.15204	0	20.484
AT1G12390	252.469	0.0420264	0.425004	0.0988848	0.92123	0.99995	224.606	178.602	342.946	264.701	228.891	275.071
AT1G12400	114.055	-2.34554	1.57812	-1.48629	0.137204	0.714685	247.747	154.312	170.47	6.45611	0	105.346
AT1G12410	1824.34	0.217777	0.442404	0.492258	0.622537	0.980538	1977.89	1698.86	1382.81	2898.79	1373.35	1614.34
AT1G12411	0.238135	-0.786905	4.02438	-0.195535	0.844974	NA	0	1.42881	0	0	0	0
AT1G12420	47.2033	0.993465	1.56551	0.634594	0.525693	0.959412	19.7381	36.4347	38.6064	64.5611	0	123.88
AT1G12423	0	NA	NA	NA	NA	NA	0	0	0	0	0	0
AT1G12430	110.801	0.971195	0.64736	1.50024	0.133552	0.707004	63.9786	87.872	73.2018	60.2571	216.602	162.897
AT1G12440	1298.16	0.285677	0.214243	1.33343	0.182391	0.769548	1254.39	1117.33	1138.14	1504.27	1327.26	1447.54
AT1G12450	138.262	-1.3451	1.447	-0.929578	0.35259	0.866858	179.684	141.452	274.256	94.6897	0	139.486
AT1G12451	0	NA	NA	NA	NA	NA	0	0	0	0	0	0
AT1G12460	49.5031	-3.06019	1.88314	-1.62505	0.104152	0.646064	38.1149	141.452	86.2378	0	0	31.2137
AT1G12470	267.839	-0.0546317	0.506382	-0.107886	0.914086	0.99995	272.249	307.909	237.154	406.735	218.138	164.848
AT1G12480	2.27437	-4.06345	3.91909	-1.03684	0.299813	0.833712	12.9318	0.714406	0	0	0	0
AT1G12490	3.414	5.90464	3.92672	1.50371	0.132656	0.703914	0	0	0	0	0	20.484
AT1G12500	574.114	0.142626	0.672111	0.212206	0.831946	0.99995	450.572	500.084	686.894	238.876	1102.98	465.28
AT1G12510	0	NA	NA	NA	NA	NA	0	0	0	0	0	0
AT1G12520	929.908	0.128342	0.292239	0.439167	0.660541	0.986975	1017.53	838.713	810.735	903.856	855.653	1152.96
AT1G12530	225.707	0.158559	1.56389	0.101388	0.919243	0.99995	148.376	212.893	278.769	273.309	0	440.894
AT1G12540	0	NA	NA	NA	NA	NA	0	0	0	0	0	0
AT1G12550	245.176	0.657042	0.572166	1.14834	0.250828	0.812501	102.774	204.32	263.727	221.66	423.986	254.587
AT1G12560	1.13437	-3.05845	3.93146	-0.777943	0.436603	NA	6.80623	0	0	0	0	0
AT1G12570	12.7926	-6.55626	3.53784	-1.85318	0.0638565	0.521938	22.4606	54.2949	0	0	0	0
AT1G12580	1661.13	0.403376	0.268726	1.50107	0.133338	0.706058	1385.75	1348.08	1557.8	1614.03	2224.39	1836.73
AT1G12590	0.602264	-2.14954	3.95299	-0.543775	0.586596	NA	0.680623	1.42881	1.50415	0	0	0
AT1G12600	8.55922	-0.907667	2.25068	-0.403285	0.686738	0.991112	19.0574	5.71525	9.02488	0	0	17.5577
AT1G12610	2744.61	0.45849	0.781138	0.586952	0.557236	0.965643	1262.56	3295.56	2379.06	1979.87	1135.24	6415.4
AT1G12620	68.1282	0.202456	2.28946	0.0884295	NA	NA	17.0156	85.0143	88.2433	0	0	218.496
AT1G12630	2.82382	-4.37705	3.91669	-1.11754	0.263764	0.819299	12.9318	0	4.01106	0	0	0
AT1G12640	354.157	-0.737279	0.580487	-1.27011	0.204047	0.789845	515.232	318.625	492.859	445.472	156.691	196.061
AT1G12650	215.857	0.695445	0.418451	1.66195	0.0965226	0.626658	179.684	126.45	189.021	208.748	248.861	342.376
AT1G12660	0	NA	NA	NA	NA	NA	0	0	0	0	0	0
AT1G12663	0	NA	NA	NA	NA	NA	0	0	0	0	0	0
AT1G12665	0	NA	NA	NA	NA	NA	0	0	0	0	0	0
AT1G12667	0	NA	NA	NA	NA	NA	0	0	0	0	0	0
AT1G12669	0	NA	NA	NA	NA	NA	0	0	0	0	0	0
AT1G12670	0.501382	-1.90109	3.9616	-0.479878	0.631314	NA	0	0	3.00829	0	0	0
AT1G12672	4.42405	-5.02412	3.91311	-1.28392	0.199169	0.786461	26.5443	0	0	0	0	0
AT1G12680	214.453	-0.228867	1.13659	-0.201363	0.840415	0.99995	313.767	245.041	135.875	8.60815	371.756	211.668
AT1G12700	42.7016	0.775957	1.93036	0.401974	0.687703	0.991112	0.680623	52.1517	41.6147	81.7774	0	79.9852
AT1G12710	110.037	0.702158	1.61034	0.436031	0.662814	0.98703	28.5862	140.024	82.7281	200.139	0	208.742
AT1G12720.1	0	NA	NA	NA	NA	NA	0	0	0	0	0	0
AT1G12725.1	0	NA	NA	NA	NA	NA	0	0	0	0	0	0
AT1G12730	80.065	1.53282	1.53495	0.998614	0.317982	0.838898	22.4606	47.8652	53.1465	0	213.529	143.388
AT1G12740	3.12007	3.46917	3.86233	0.898206	0.369076	0.877638	0	0	1.50415	17.2163	0	0
AT1G12750	342.55	-1.42212	0.658084	-2.161	0.0306954	0.352091	470.31	541.52	486.842	79.6254	133.648	343.351
AT1G12760	680.737	-0.121565	0.429525	-0.283022	0.77716	0.997537	793.606	698.689	637.257	387.367	820.321	747.179
AT1G12770	375.292	-0.377612	1.56478	-0.24132	0.809307	0.999308	480.52	375.063	416.649	617.635	0	361.884
AT1G12775	34.3762	-1.84845	1.45984	-1.2662	0.205441	0.792193	64.6592	67.1542	29.0802	36.5846	0	8.77886
AT1G12780	857.897	0.609891	0.394788	1.54486	0.122381	0.684812	534.289	873.719	628.734	1310.59	1003.13	796.926
AT1G12790	26.2194	-1.80525	1.51412	-1.19227	0.233155	0.805429	49.0049	41.4356	32.5899	0	3.07236	31.2137
AT1G12800	1031.63	-0.0699062	0.268395	-0.26046	0.794509	0.998906	1250.3	955.875	963.156	1043.74	1046.14	930.56
AT1G12805	1.62572	4.84649	3.94811	1.22755	0.219617	NA	0	0	0	0	0	9.75429
AT1G12810	206.888	-1.85036	1.43967	-1.28527	0.198697	0.78629	437.641	206.463	327.904	105.45	0	163.872
AT1G12820	425.475	-0.470614	0.40989	-1.14815	0.250908	0.812501	424.709	498.656	561.047	275.461	296.483	496.494
AT1G12830	155.173	0.519724	0.864018	0.60152	0.547494	0.964633	125.915	166.457	89.7474	247.484	267.296	34.14
AT1G12840	2113.75	-0.295863	0.315203	-0.938644	0.347913	0.863346	2328.41	2279.67	2380.06	2343.57	1419.43	1931.35
AT1G12845	221.509	0.0887329	1.5951	0.0556284	0.955638	0.99995	205.548	131.451	306.846	505.729	0	179.479
AT1G12850	411.112	-0.64212	1.56539	-0.410198	0.68166	0.99035	679.942	408.64	414.643	591.81	0	371.639
AT1G12855	3.42611	-4.65885	3.91493	-1.19002	0.234039	0.805745	0	0	20.5567	0	0	0
AT1G12860	313.367	0.17126	0.362074	0.472999	0.636214	0.982673	334.867	282.905	267.738	243.18	388.654	362.86
AT1G12870	9.84893	3.30888	3.76529	0.878784	0.379519	0.885366	5.44498	0	0	0	0	53.6486
AT1G12880	489.271	4.78132	0.907135	5.27079	1.36e-07	2.45e-05	19.7381	17.8602	65.1797	232.42	860.262	1740.17
AT1G12890	22.353	5.42	2.91798	1.85745	NA	NA	0	0	3.00829	4.30408	0	126.806
AT1G12900	20628.1	-0.431242	0.565634	-0.762404	0.445819	0.924406	23420.2	23266.1	24377.2	30535.3	8647.17	13522.4
AT1G12910	1140.52	0.0794112	0.548864	0.144683	0.884961	0.99995	1337.42	992.31	996.247	1988.48	823.393	705.235
AT1G12920	860.394	-0.0613437	0.410705	-0.149362	0.881268	0.99995	842.611	960.876	831.292	1196.53	576.068	754.982
AT1G12930	189.898	-0.0811117	1.09751	-0.0739052	0.941086	0.99995	204.187	156.455	225.622	8.60815	230.427	314.088
AT1G12935.1	0	NA	NA	NA	NA	NA	0	0	0	0	0	0
AT1G12938	0	NA	NA	NA	NA	NA	0	0	0	0	0	0
AT1G12940	0	NA	NA	NA	NA	NA	0	0	0	0	0	0
AT1G12950	0	NA	NA	NA	NA	NA	0	0	0	0	0	0
AT1G12960	0	NA	NA	NA	NA	NA	0	0	0	0	0	0
AT1G12970	283.508	0.9291	0.647431	1.43506	0.151271	0.740714	163.35	146.453	275.76	236.724	654.413	224.349
AT1G12980	0	NA	NA	NA	NA	NA	0	0	0	0	0	0
AT1G12990	653.331	-0.292385	0.892379	-0.327647	0.743178	0.995744	621.409	674.399	862.378	684.348	73.7367	1003.72
AT1G13000	236.03	0.261986	0.458634	0.571231	0.567843	0.967767	206.229	269.331	167.462	352.934	231.963	188.258
AT1G13010	0	NA	NA	NA	NA	NA	0	0	0	0	0	0
AT1G13020	95.1989	-0.957383	1.45817	-0.656566	0.51146	0.954417	131.36	118.591	127.351	60.2571	0	133.634
AT1G13030	31.7151	-1.13235	1.59996	-0.707736	0.47911	0.943288	50.3661	27.1474	53.6479	6.45611	0	52.6732
AT1G13040	0.620876	-2.19194	3.95166	-0.554687	0.579108	NA	2.72249	0	1.00276	0	0	0
AT1G13050	8.70533	-6.00177	2.16943	-2.76652	0.00566585	0.116555	9.52872	22.1466	20.5567	0	0	0
AT1G13060	587.51	-0.346049	0.608674	-0.56853	0.569675	0.968128	588.058	541.52	841.821	921.072	298.019	334.572
AT1G13070	0.238135	-0.786905	4.02438	-0.195535	0.844974	NA	0	1.42881	0	0	0	0
AT1G13080	308.195	-0.767007	1.48668	-0.51592	0.60591	0.975507	426.07	320.768	418.153	0	439.348	244.833
AT1G13090	567.87	-1.16311	1.55818	-0.746455	0.455393	0.929667	824.234	639.394	891.959	387.367	0	664.267
AT1G13100	177.399	-4.16404	0.76596	-5.43638	5.44e-08	1.1e-05	279.055	341.486	389.574	6.45611	10.7533	37.0663
AT1G13110	1347.98	-2.04948	0.513804	-3.98885	6.64e-05	0.00416606	1933.65	1975.33	2602.68	813.47	480.825	281.899
AT1G13120	199.796	-1.04261	1.51441	-0.688459	0.491164	0.948169	359.369	296.479	151.417	129.122	0	262.39
AT1G13130	0	NA	NA	NA	NA	NA	0	0	0	0	0	0
AT1G13140	10.24	-5.27366	2.89398	-1.82228	0.068412	0.535524	0	22.861	37.6037	0	0	0.975429
AT1G13145	74.1777	1.30117	0.504903	2.57707	0.00996428	0.174493	42.1986	52.1517	34.5954	75.3213	130.575	110.224
AT1G13150	33.5571	2.53554	3.04032	0.833971	NA	NA	0	22.1466	7.52074	0	0	171.676
AT1G13160	80.9079	-0.759423	1.46364	-0.518858	0.60386	0.975369	91.8841	105.732	107.797	58.105	0	121.929
AT1G13170	56.9881	-0.182087	1.56395	-0.116428	0.907313	0.99995	80.9941	51.4372	49.6369	30.1285	0	129.732
AT1G13180	147.816	1.17127	1.0487	1.11688	0.264047	0.819299	52.408	119.306	100.778	219.508	376.365	18.5332
AT1G13190	295.347	-0.398673	0.411635	-0.96851	0.33279	0.848659	255.914	408.64	343.447	273.309	187.414	303.359
AT1G13195	197.325	0.18106	0.405243	0.446795	0.655023	0.986082	132.721	212.893	209.578	176.467	239.644	212.644
AT1G13200	0.119068	0.279992	4.08047	0.0686175	0.945294	NA	0	0.714406	0	0	0	0
AT1G13210	610.699	0.149963	0.725432	0.206722	0.836227	0.99995	242.982	750.841	743.049	417.495	1145.99	363.835
AT1G13220	603.826	0.0655723	0.613092	0.106953	0.914826	0.99995	719.418	660.111	391.58	264.701	946.288	640.857
AT1G13230	0.417819	-1.64126	3.97232	-0.413175	0.679478	NA	0	0	2.50691	0	0	0
AT1G13240	0.334255	-1.32401	3.98825	-0.331978	0.739906	NA	0	0	2.00553	0	0	0
AT1G13245	1477.1	0.765482	0.406857	1.88145	0.0599103	0.50633	1193.13	1221.63	867.893	1545.16	2603.83	1430.95
AT1G13250	372.073	-1.05344	1.63334	-0.644957	0.518955	0.95617	380.468	580.098	545.504	643.459	0	82.9115
AT1G13260	2257.28	-0.403378	0.436997	-0.923068	0.355972	0.869777	2562.55	2939.78	2212.1	1172.86	1963.24	2693.16
AT1G13270	378.737	-0.00154225	0.844158	-0.00182697	0.998542	0.99995	394.081	440.074	301.832	643.459	428.595	64.3783
AT1G13280	276.695	-1.29775	1.50072	-0.864751	0.387176	0.891969	487.326	348.63	344.45	154.947	0	324.818
AT1G13290	0	NA	NA	NA	NA	NA	0	0	0	0	0	0
AT1G13300	67.041	-0.355576	1.59049	-0.223564	0.823097	0.99995	106.858	101.446	17.5484	81.7774	0	94.6166
AT1G13310	1.82929	-1.98309	3.90302	-0.508091	0.611389	NA	0	0	9.02488	0	0	1.95086
AT1G13320	593.903	-0.595084	1.59446	-0.373221	0.708984	0.992071	790.203	742.982	610.684	931.832	0	487.715
AT1G13330	24.6619	-1.07239	1.79943	-0.595963	0.5512	0.965074	35.3924	56.4381	8.02212	45.1928	0	2.92629
AT1G13340	722.023	-1.48289	1.04564	-1.41817	NA	NA	639.105	1831.74	720.988	116.21	79.8815	944.216
AT1G13350	883.497	0.276699	1.12492	0.245971	0.805704	0.998906	818.789	934.443	644.276	30.1285	1594.56	1278.79
AT1G13360	394.781	-0.242272	0.60546	-0.400146	0.689049	0.991112	376.385	427.929	480.324	135.578	479.289	469.182
AT1G13370	1.58555	-3.5454	3.92441	-0.903422	0.366302	NA	0	5.00084	4.51244	0	0	0
AT1G13380	321.983	-0.0894751	0.473349	-0.189026	0.850073	0.99995	374.343	344.344	277.766	335.718	181.269	418.459
AT1G13390	1081.94	-0.0212793	0.428405	-0.0496709	0.960385	0.99995	989.626	1143.05	1138.64	626.243	1219.73	1374.38
AT1G13400	0.226874	-0.725537	4.0294	-0.180061	0.857105	NA	1.36125	0	0	0	0	0
AT1G13410	0.334255	-1.32401	3.98825	-0.331978	0.739906	NA	0	0	2.00553	0	0	0
AT1G13420	83.3178	2.87278	1.63807	1.75376	0.0794721	0.574679	8.8481	35.7203	15.5429	0	325.671	114.125
AT1G13430	35.8849	1.0269	2.32014	0.4426	0.658055	0.986958	40.8374	30.0051	0	105.45	0	39.0172
AT1G13440	10391.6	-0.0598049	0.431606	-0.138564	0.889795	0.99995	11444	9238.7	11136.7	14965.3	6624.02	8940.79
AT1G13448	41.5314	1.72713	0.828334	2.08507	0.0370634	0.390453	17.0156	10.7161	29.5816	107.602	49.1578	35.1155
AT1G13450	651.939	0.101729	0.347989	0.292335	0.77003	0.997537	513.87	613.675	760.096	619.787	576.068	828.139
AT1G13460	135.99	0.369757	0.786037	0.470407	0.638064	0.983255	71.4654	163.599	121.335	47.3448	258.079	154.118
AT1G13470	1.14	-3.06539	3.93134	-0.779732	0.435549	NA	6.12561	0.714406	0	0	0	0
AT1G13480	0	NA	NA	NA	NA	NA	0	0	0	0	0	0
AT1G13485	0	NA	NA	NA	NA	NA	0	0	0	0	0	0
AT1G13490	0	NA	NA	NA	NA	NA	0	0	0	0	0	0
AT1G13500	0	NA	NA	NA	NA	NA	0	0	0	0	0	0
AT1G13510	0	NA	NA	NA	NA	NA	0	0	0	0	0	0
AT1G13520	47.0375	-0.615564	2.43009	-0.253309	NA	NA	153.14	7.85847	10.0276	0	0	111.199
AT1G13530	22.367	1.69168	2.50341	0.675751	0.499198	0.951071	1.36125	7.85847	22.5622	0	0	102.42
AT1G13540	9.63834	-0.71913	2.56502	-0.28036	0.779201	0.997537	19.7381	16.4313	0	2.15204	0	19.5086
AT1G13550	9.79009	-0.382184	3.21573	-0.118848	0.905395	0.99995	18.3768	15.0025	0	0	0	25.3612
AT1G13560	2506.2	0.370515	0.440258	0.841585	0.400021	0.900755	1297.27	2773.32	2488.36	2509.28	2488.61	3480.33
AT1G13570	160.253	-0.463845	0.72969	-0.635674	0.524989	0.958951	108.9	212.179	237.154	45.1928	176.661	181.43
AT1G13580	157.5	0.805072	0.779838	1.03236	0.301904	0.833832	53.0886	147.882	142.393	305.589	225.819	70.2309
AT1G13590	3.68071	-4.75859	3.91439	-1.21567	0.224112	0.798757	0	18.5746	3.50968	0	0	0
AT1G13600	0	NA	NA	NA	NA	NA	0	0	0	0	0	0
AT1G13605	0	NA	NA	NA	NA	NA	0	0	0	0	0	0
AT1G13607	0	NA	NA	NA	NA	NA	0	0	0	0	0	0
AT1G13608	0	NA	NA	NA	NA	NA	0	0	0	0	0	0
AT1G13609	112.886	4.42614	1.10693	3.99858	6.37e-05	0.0040882	6.12561	4.28644	19.5539	64.5611	81.4176	501.371
AT1G13610	7.60029	-5.80512	3.91046	-1.48451	0.137673	0.715571	45.6017	0	0	0	0	0
AT1G13620	0.167127	-0.355298	4.06297	-0.087448	0.930315	NA	0	0	1.00276	0	0	0
AT1G13630	7.58307	-5.8024	2.29589	-2.5273	0.0114943	0.190771	6.80623	22.1466	16.5456	0	0	0
AT1G13635	1.98883	-2.80925	3.89144	-0.721904	0.470354	0.938363	9.52872	1.42881	0	0	0	0.975429
AT1G13640	375.72	0.134347	0.343226	0.391426	0.695483	0.991112	353.243	347.201	373.029	505.729	310.309	364.811
AT1G13650	1261.88	0.208563	0.431597	0.483237	0.628928	0.98063	1263.24	747.269	1502.14	1060.95	1665.22	1332.44
AT1G13660.1	0	NA	NA	NA	NA	NA	0	0	0	0	0	0
AT1G13670	62.8428	1.97029	1.13392	1.73759	0.082283	0.587576	10.89	58.5813	7.52074	27.9765	101.388	170.7
AT1G13680	0	NA	NA	NA	NA	NA	0	0	0	0	0	0
AT1G13690	383.037	-0.590943	0.938505	-0.629665	0.528914	0.960447	467.588	406.497	506.898	499.273	30.7236	387.245
AT1G13700	950.816	0.478844	0.431797	1.10896	0.267449	0.822148	781.355	883.72	718.982	701.564	1574.59	1044.68
AT1G13710	0.567186	-2.05556	3.95608	-0.519596	0.603345	NA	3.40311	0	0	0	0	0
AT1G13720	0	NA	NA	NA	NA	NA	0	0	0	0	0	0
AT1G13730	139.208	-0.263552	1.51315	-0.174174	0.861728	0.99995	199.423	102.874	153.423	167.859	0	211.668
AT1G13740	168.039	-0.527198	1.82046	-0.289595	0.772126	0.997537	85.7585	162.885	346.957	10.7602	0	401.877
AT1G13750	44.0561	-0.867059	1.55945	-0.556002	0.57821	0.970626	89.1616	64.2966	17.5484	27.9765	0	65.3538
AT1G13755	0.226874	-0.725537	4.0294	-0.180061	0.857105	NA	1.36125	0	0	0	0	0
AT1G13760	0	NA	NA	NA	NA	NA	0	0	0	0	0	0
AT1G13770	107.26	0.807251	0.570389	1.41526	0.156991	0.747887	98.0097	39.2923	96.7668	118.362	142.865	148.265
AT1G13780	36.4848	-0.412765	2.29259	-0.180043	0.857119	0.99995	7.48685	72.155	45.6258	0	0	93.6412
AT1G13790	44.9646	3.33794	2.51923	1.32498	NA	NA	0	19.289	5.01382	4.30408	241.181	0
AT1G13800	9.67492	2.59375	3.24374	0.799617	0.423933	0.916367	5.44498	2.85762	0	0	0	49.7469
AT1G13810	40.32	-0.326566	2.28448	-0.14295	0.88633	0.99995	47.6436	25.0042	61.67	107.602	0	0
AT1G13820	1074.68	0.16174	0.56832	0.284594	0.775956	0.997537	1049.52	985.881	1006.78	2001.39	643.66	760.835
AT1G13830	1.58771	-3.55232	3.92432	-0.905207	0.365356	NA	0	0	9.52627	0	0	0
AT1G13840	0	NA	NA	NA	NA	NA	0	0	0	0	0	0
AT1G13850	0.119068	0.279992	4.08047	0.0686175	0.945294	NA	0	0.714406	0	0	0	0
AT1G13860	130.895	-0.210048	1.55157	-0.135377	0.892314	0.99995	89.1616	154.312	177.991	94.6897	0	269.218
AT1G13870	114.954	0.984736	0.918876	1.07167	0.283866	0.82868	92.5647	85.0143	54.1493	36.5846	328.743	92.6658
AT1G13880	341.016	-0.993412	1.51792	-0.654458	0.512817	0.954492	506.383	440.074	415.646	284.069	0	399.926
AT1G13890	1.28159	-3.2338	3.92865	-0.823133	0.410432	NA	3.40311	4.28644	0	0	0	0
AT1G13900	78.5097	-0.823568	1.4672	-0.561318	0.574581	0.969731	62.6173	130.736	107.797	64.5611	0	105.346
AT1G13910	102.627	-0.960989	0.519711	-1.84908	0.0644457	0.523942	145.653	135.023	125.346	71.0172	96.7795	41.9435
AT1G13920	59.3483	1.70341	1.79028	0.951474	0.341364	0.857845	33.3505	5.00084	45.1244	234.572	0	38.0417
AT1G13930	4386.19	-0.168738	0.447798	-0.376816	0.70631	0.991112	4752.11	3659.19	5514.71	5892.28	2606.9	3891.96
AT1G13940	115.309	0.488499	1.48569	0.328802	0.742305	0.995744	123.193	94.3016	70.6949	0	181.269	222.398
AT1G13950	193.544	0.124635	1.57043	0.0793635	0.936743	0.99995	273.61	122.163	159.941	206.596	0	398.951
AT1G13960	256.927	-0.262621	1.53555	-0.171027	0.864202	0.99995	268.846	271.474	300.328	402.431	0	298.481
AT1G13970	22.1251	-0.41711	2.1994	-0.189648	0.849585	0.99995	25.8637	15.7169	34.5954	0	0	56.5749
AT1G13980	180.39	0.595733	0.56017	1.06349	0.287561	0.831166	185.129	152.883	93.7585	122.666	281.121	246.784
AT1G13990	488.718	-0.685313	0.465374	-1.47261	0.140857	0.723479	557.43	575.811	675.863	348.63	227.355	547.216
AT1G14000	540.997	-0.680229	0.321285	-2.11721	0.034242	0.373916	631.618	588.671	779.65	374.455	370.22	501.371
AT1G14010	292.519	-0.994692	1.513	-0.657432	0.510903	0.954051	267.485	430.787	470.297	316.35	0	270.194
AT1G14020	98.0934	-0.756133	1.48039	-0.510765	0.609515	0.976652	176.281	80.7279	112.811	86.0815	0	132.658
AT1G14030	649.519	0.0720483	0.445769	0.161627	0.871599	0.99995	745.963	534.376	619.709	490.665	981.62	524.781
AT1G14040	8.87114	-6.02961	2.12976	-2.83113	0.00463844	0.101026	17.0156	12.1449	24.0664	0	0	0
AT1G14048	0.238135	-0.786905	4.02438	-0.195535	0.844974	NA	0	1.42881	0	0	0	0
AT1G14060	116.01	0.159276	1.03755	0.153512	0.877995	0.99995	70.1042	129.308	129.357	49.4969	293.411	24.3857
AT1G14070	34.2876	1.5486	1.62534	0.952787	0.340698	0.85677	8.8481	17.8602	25.5705	107.602	0	45.8452
AT1G14071	0.907497	-2.73579	3.93762	-0.694783	0.487191	NA	5.44498	0	0	0	0	0
AT1G14080	0.238135	-0.786905	4.02438	-0.195535	0.844974	NA	0	1.42881	0	0	0	0
AT1G14090	25.4678	-1.72165	2.03271	-0.84697	0.397012	0.898733	55.8111	29.2907	32.5899	0	0	35.1155
AT1G14100	0	NA	NA	NA	NA	NA	0	0	0	0	0	0
AT1G14110	0	NA	NA	NA	NA	NA	0	0	0	0	0	0
AT1G14120	35.6855	-2.52102	2.02392	-1.24561	0.212907	0.795211	40.8374	69.2974	71.6977	32.2806	0	0
AT1G14130	159.292	-0.538533	1.51673	-0.355062	0.722543	0.994088	120.47	177.173	268.24	236.724	0	153.142
AT1G14140	344.049	0.0558556	0.370185	0.150886	0.880066	0.99995	304.238	363.633	343.948	318.502	460.855	273.12
AT1G14150	1486.79	-0.185899	0.466528	-0.398473	0.690282	0.991112	1648.47	1325.22	1771.89	2154.19	1033.85	987.134
AT1G14160	1.42881	-3.39031	3.9264	-0.863465	0.387882	NA	0	8.57287	0	0	0	0
AT1G14170	37.9227	0.550227	0.70375	0.78185	0.434303	0.920817	35.3924	26.433	31.0857	32.2806	29.1875	73.1572
AT1G14180	29.8678	-0.30235	2.20619	-0.137046	0.890994	0.99995	18.3768	35.7203	45.1244	0	0	79.9852
AT1G14182	2.39344	-4.1371	3.91848	-1.05579	0.291063	0.831166	12.9318	1.42881	0	0	0	0
AT1G14185	25.242	-1.18814	2.13677	-0.556045	0.57818	0.970626	17.0156	31.4339	57.1576	0	0	45.8452
AT1G14190	1.42881	-3.39031	3.9264	-0.863465	0.387882	NA	0	8.57287	0	0	0	0
AT1G14200	196.884	-3.10354	1.5082	-2.05778	0.0396116	0.405558	392.039	390.78	276.262	0	6.14473	116.076
AT1G14205	43.6841	0.738964	1.62884	0.453676	0.650062	0.985382	10.2093	57.8669	30.0829	94.6897	0	69.2555
AT1G14210	200.796	1.14343	0.495982	2.30539	0.0211447	0.280658	151.779	83.5855	139.886	232.42	382.509	214.594
AT1G14220	0	NA	NA	NA	NA	NA	0	0	0	0	0	0
AT1G14225	0	NA	NA	NA	NA	NA	0	0	0	0	0	0
AT1G14230	214.058	0.542154	1.42017	0.381752	0.702645	0.991112	175.601	144.31	203.06	2.15204	663.631	95.5921
AT1G14240	0.113437	0.279992	4.08047	0.0686175	0.945294	NA	0.680623	0	0	0	0	0
AT1G14250	1174.71	-0.471554	0.479074	-0.984304	0.324966	0.841356	1943.18	868.004	1283.54	897.4	1301.15	754.982
AT1G14260	4.39507	-5.01441	3.91315	-1.28143	0.200044	0.787404	15.6543	10.7161	0	0	0	0
AT1G14270	1290.17	-0.211337	0.263751	-0.801276	0.422972	0.915642	1360.57	1355.94	1438.47	977.025	1338.01	1270.98
AT1G14280	972.233	0.0146179	0.347947	0.0420119	0.966489	0.99995	1016.17	925.87	961.651	684.348	1044.6	1200.75
AT1G14290	687.498	-0.381791	0.478968	-0.79711	0.425387	0.916782	611.88	854.43	865.887	916.768	422.45	453.575
AT1G14300	49.8828	-4.29861	1.57515	-2.72902	0.00635219	0.126765	113.664	109.304	62.6728	0	0	13.656
AT1G14310	186.976	0.435962	0.503315	0.866182	0.38639	0.891585	104.135	228.61	144.398	172.163	265.759	206.791
AT1G14315	0.325143	2.73332	4.05906	0.673389	0.5007	NA	0	0	0	0	0	1.95086
AT1G14320	10257.4	-0.208345	0.58744	-0.354666	0.72284	0.994088	11716.2	11099	10173.6	17248.6	5020.24	6286.64
AT1G14330	439.835	0.47016	0.802425	0.585923	0.557927	0.966112	275.652	433.645	397.095	219.508	1101.44	211.668
AT1G14340	267.476	0.903293	0.612756	1.47415	0.140442	0.722831	219.841	185.746	153.423	271.157	599.111	175.577
AT1G14345	1341.14	-0.375758	0.657256	-0.571707	0.567521	0.967507	1432.03	1555.26	1555.79	2227.36	493.114	783.27
AT1G14350	61.9784	-1.00389	1.44428	-0.695083	0.487003	0.947066	48.3242	97.8736	101.781	73.1693	0	50.7223
AT1G14360	68.6359	-2.00996	1.41889	-1.41658	0.156606	0.747887	160.627	45.722	123.841	27.9765	0	53.6486
AT1G14370	219.83	0.486546	0.617645	0.787743	0.430847	0.918493	196.019	217.179	135.373	439.016	138.256	193.135
AT1G14380	476.112	0.8747	0.575902	1.51883	0.128804	0.69847	389.316	337.2	281.276	596.114	970.867	281.899
AT1G14390	12.361	1.39598	2.43605	0.573049	0.566611	0.967507	8.8481	2.14322	9.52627	0	0	53.6486
AT1G14400	1379.16	0.475121	0.396549	1.19814	0.230863	0.802389	1152.29	1141.62	1167.72	2119.76	1013.88	1679.69
AT1G14410	300.657	0.525287	0.368961	1.42369	0.154535	0.744315	238.218	187.174	313.364	385.215	361.003	318.965
AT1G14420	0	NA	NA	NA	NA	NA	0	0	0	0	0	0
AT1G14430	78.957	1.15892	2.32029	0.499471	NA	NA	51.7273	37.1491	57.659	0	327.207	0
AT1G14440	0.113437	0.279992	4.08047	0.0686175	0.945294	NA	0.680623	0	0	0	0	0
AT1G14450	918.326	0.250421	0.861313	0.290744	0.771247	0.997537	862.349	805.136	848.339	2037.98	168.98	787.171
AT1G14455	0	NA	NA	NA	NA	NA	0	0	0	0	0	0
AT1G14460	24.4989	-2.11875	2.07409	-1.02153	0.307002	0.835727	32.6699	40.7212	45.6258	27.9765	0	0
AT1G14470	0	NA	NA	NA	NA	NA	0	0	0	0	0	0
AT1G14480	21.5006	-0.127001	2.49496	-0.0509028	0.959403	0.99995	1.36125	52.1517	14.0387	0	0	61.452
AT1G14490	0	NA	NA	NA	NA	NA	0	0	0	0	0	0
AT1G14500	8.86504	-6.02791	3.69423	-1.63171	0.10274	0.64302	30.628	0	22.5622	0	0	0
AT1G14510	345.334	1.2831	0.59686	2.14974	0.0315754	0.357566	208.951	210.75	184.007	241.028	844.9	382.368
AT1G14518	5.52743	6.59534	3.91915	1.68285	0.0924037	0.613752	0	0	0	0	0	33.1646
AT1G14520	578.01	0.4881	0.401212	1.21656	0.22377	0.798282	398.845	502.228	543.499	535.857	556.098	931.535
AT1G14530	103.423	1.14978	1.49982	0.766613	0.443312	0.923318	72.8267	70.0118	50.1382	0	211.993	215.57
AT1G14540	75.146	-9.11164	1.38231	-6.59162	4.35e-11	2.56e-08	137.486	127.879	185.511	0	0	0
AT1G14549	0	NA	NA	NA	NA	NA	0	0	0	0	0	0
AT1G14550	0	NA	NA	NA	NA	NA	0	0	0	0	0	0
AT1G14560	290.945	-0.36492	0.612317	-0.595966	0.551198	0.965074	326.699	307.909	348.461	281.917	98.3156	382.368
AT1G14570	308.569	-0.14706	0.360123	-0.408362	0.683008	0.990874	355.966	351.488	266.735	223.812	325.671	327.744
AT1G14580	339.609	0.807758	0.805116	1.00328	0.315725	0.838581	309.003	189.318	242.168	430.408	771.163	95.5921
AT1G14590	101.591	0.713559	1.56223	0.456756	0.647847	0.98458	49.6855	120.02	61.1687	210.9	0	167.774
AT1G14600	105.316	0.598115	1.02484	0.583619	0.559477	0.966159	82.3554	76.4415	92.7557	15.0643	276.513	88.7641
AT1G14610	491.79	0.385948	0.277684	1.38988	0.164565	0.752776	488.007	382.207	408.627	555.226	611.4	505.272
AT1G14620	202.93	0.793241	1.60662	0.493734	0.621494	0.980405	140.889	131.451	172.977	591.81	0	180.454
AT1G14630	10.233	3.36034	3.76502	0.892517	0.372116	0.879787	5.44498	0	0	55.953	0	0
AT1G14640	8.34449	0.539431	2.01515	0.267688	0.78894	0.998906	2.72249	16.4313	1.50415	0	3.07236	26.3366
AT1G14642	40.6283	0.535455	1.01487	0.527609	0.59777	0.975369	44.9211	41.4356	13.5373	10.7602	81.4176	51.6978
AT1G14650	296.017	0.198585	1.57235	0.126298	0.899496	0.99995	330.102	302.908	194.035	469.144	0	479.911
AT1G14660	55.5739	-0.366714	1.41258	-0.259606	0.795168	0.998906	61.2561	53.5805	73.2018	0	93.7071	51.6978
AT1G14670	247.403	-0.69428	1.52471	-0.455352	0.648856	0.984844	270.207	333.628	313.364	380.911	0	186.307
AT1G14680	10.5485	-6.27946	2.35146	-2.67045	0.00757486	0.144124	3.40311	24.2898	35.5982	0	0	0
AT1G14685	328.928	-0.883725	0.765996	-1.15369	0.248625	0.812501	430.834	460.078	388.07	434.712	59.9111	199.963
AT1G14686	0.340311	-1.31489	3.98876	-0.329648	0.741666	NA	2.04187	0	0	0	0	0
AT1G14687	27.7672	-0.514131	2.33728	-0.219969	0.825895	0.99995	44.9211	44.2932	8.5235	68.8652	0	0
AT1G14688	6.4689	3.74276	3.80124	0.984615	0.324813	0.841069	2.72249	0	0	0	0	36.0909
AT1G14690	354.087	0.980049	0.664022	1.47593	0.139963	0.722357	278.375	305.051	131.864	202.292	725.078	481.862
AT1G14700	895.06	-0.166699	0.524958	-0.317547	0.750829	0.996427	1333.34	557.237	950.621	587.506	760.41	1181.24
AT1G14710	306.053	0.553118	0.581869	0.950588	0.341814	0.858544	197.381	332.913	214.09	245.332	603.719	242.882
AT1G14720	628.208	0.378066	0.471166	0.802404	0.422319	0.915585	442.405	607.245	589.124	602.571	1064.57	463.329
AT1G14730	25.9338	0.268587	2.73653	0.0981486	NA	NA	67.3817	2.85762	0.501382	0	0	84.8624
AT1G14740	573.597	0.664396	0.588283	1.12938	0.258737	0.816087	375.704	461.506	494.363	372.302	1230.48	507.223
AT1G14750	0	NA	NA	NA	NA	NA	0	0	0	0	0	0
AT1G14755	0	NA	NA	NA	NA	NA	0	0	0	0	0	0
AT1G14760	1.13437	-3.05845	3.93146	-0.777943	0.436603	NA	6.80623	0	0	0	0	0
AT1G14770	92.1584	0.108244	1.47831	0.0732211	0.94163	0.99995	95.2872	99.3025	71.6977	0	202.776	83.8869
AT1G14780	17.81	-3.38103	1.82212	-1.85555	0.0635181	0.521056	36.7536	49.294	12.0332	0	0	8.77886
AT1G14790	76.4945	0.61374	1.57597	0.389436	0.696954	0.991112	32.6699	58.5813	90.2488	88.2335	0	189.233
AT1G14800	0	NA	NA	NA	NA	NA	0	0	0	0	0	0
AT1G14810	318.897	0.382543	0.900582	0.424773	0.671002	0.989133	375.704	247.899	207.071	120.514	829.538	132.658
AT1G14820	283.869	-0.383654	1.56695	-0.244841	0.806579	0.998917	460.782	265.045	238.157	499.273	0	239.956
AT1G14830	437.262	-0.0562855	0.639581	-0.0880037	0.929874	0.99995	474.394	482.224	380.549	617.635	145.937	522.83
AT1G14840	125.423	-1.18117	1.47929	-0.798468	0.424599	0.916384	148.376	215.036	158.437	172.163	0	58.5258
AT1G14850	68.2948	-0.283551	2.26737	-0.125057	0.900478	0.99995	85.0779	76.4415	63.1742	185.075	0	0
AT1G14860	79.1072	0.305985	1.90269	0.160817	NA	NA	76.2298	77.8703	58.1604	4.30408	258.079	0
AT1G14870	322.101	-0.510103	0.691919	-0.73723	0.460982	0.933803	266.124	385.065	482.831	503.577	132.112	162.897
AT1G14880	0	NA	NA	NA	NA	NA	0	0	0	0	0	0
AT1G14890	299.053	-1.19546	1.62504	-0.735652	0.461942	0.93453	291.307	575.097	382.053	486.36	0	59.5012
AT1G14900	54.5053	-1.70782	1.55326	-1.0995	0.271548	0.823926	134.763	36.4347	79.7198	10.7602	0	65.3538
AT1G14910	99.1397	-1.72781	1.41792	-1.21855	0.223013	0.798282	148.376	143.596	164.453	103.298	0	35.1155
AT1G14920	234.162	-0.245989	0.638336	-0.38536	0.699971	0.991112	196.019	183.602	383.056	103.298	319.526	219.472
AT1G14930	3.40311	-4.64539	3.91501	-1.18656	0.235402	0.805745	20.4187	0	0	0	0	0
AT1G14940	0	NA	NA	NA	NA	NA	0	0	0	0	0	0
AT1G14950	0	NA	NA	NA	NA	NA	0	0	0	0	0	0
AT1G14960	2.86938	5.62729	3.93092	1.43154	0.152274	0.740714	0	0	0	17.2163	0	0
AT1G14970	25.2059	-5.36979	1.51119	-3.55335	0.000380353	0.0164076	82.3554	32.8627	33.0912	0	0	2.92629
AT1G14980	1043.44	-0.0729742	0.669149	-0.109055	0.913159	0.99995	1283.65	1046.61	877.921	1973.42	537.664	541.363
AT1G14990	195.771	0.972099	0.817495	1.18912	0.234393	0.805745	85.7585	139.309	171.473	122.666	542.272	113.15
AT1G15000	209.597	-1.02686	1.50593	-0.681876	0.495317	0.949561	309.683	205.749	328.405	126.97	0	286.776
AT1G15002	15.6307	0.336459	1.97227	0.170595	0.864542	0.99995	10.89	10.7161	19.5539	51.6489	0	0.975429
AT1G15010	5229.22	-0.0854417	0.618459	-0.138153	0.89012	0.99995	4025.88	6859.01	5267.52	5834.17	1871.07	7517.63
AT1G15015	38.8049	-0.598768	1.18593	-0.504893	0.613634	0.977643	85.0779	44.2932	11.5318	6.45611	23.0427	62.4275
AT1G15020	272.9	0.759206	0.634141	1.19722	0.231221	0.802425	196.019	239.326	172.977	180.771	619.081	229.226
AT1G15030	374.17	-0.813536	0.586185	-1.38785	0.165184	0.753163	566.959	352.202	510.407	449.776	141.329	224.349
AT1G15040	400.991	-0.928699	0.784187	-1.18428	0.236302	0.805856	579.21	664.398	332.417	572.442	112.141	145.339
AT1G15045	0	NA	NA	NA	NA	NA	0	0	0	0	0	0
AT1G15050	59.4266	0.639938	1.13446	0.564092	0.572692	0.96955	31.9893	52.8661	54.1493	109.754	102.924	4.87715
AT1G15060	183.893	-2.11853	1.53662	-1.37869	0.16799	0.75691	359.369	225.752	312.361	21.5204	0	184.356
AT1G15080	124.906	0.564404	1.81407	0.311125	NA	NA	58.5336	117.163	126.348	434.712	0	12.6806
AT1G15090	0	NA	NA	NA	NA	NA	0	0	0	0	0	0
AT1G15100	418.579	-1.11804	0.664325	-1.68297	0.0923805	0.613752	341.673	631.535	747.06	101.146	388.654	301.408
AT1G15110	47.6912	-1.58301	2.10367	-0.752498	0.451752	0.927862	120.47	29.2907	65.1797	0	0	71.2063
AT1G15120	849.863	1.0624	0.463689	2.2912	0.021952	0.287559	509.787	490.797	649.29	1745.3	921.709	782.294
AT1G15125	11.0294	0.233752	1.62782	0.143598	0.885818	0.99995	10.89	12.8593	7.01935	0	6.14473	29.2629
AT1G15130	532.224	-0.221876	0.373082	-0.594711	0.552037	0.9656	615.964	655.825	446.23	628.395	436.276	410.656
AT1G15140	737.75	-0.27105	0.625041	-0.433651	0.664542	0.987388	996.432	716.549	707.451	918.92	236.572	850.574
AT1G15150	1.00276	-2.89263	3.93446	-0.735205	0.462215	NA	0	0	6.01659	0	0	0
AT1G15160	43.5581	0.0757082	1.56785	0.0482878	0.961487	0.99995	66.7011	18.5746	42.1161	45.1928	0	88.7641
AT1G15165	35.6561	-1.23516	2.09689	-0.589045	0.555831	0.965643	34.0311	67.8686	48.6341	0	0	63.4029
AT1G15170	117.811	-0.484933	0.863819	-0.561383	0.574536	0.969731	152.46	107.875	151.919	43.0408	213.529	38.0417
AT1G15175	80.3912	0.051704	1.73746	0.0297584	0.97626	0.99995	76.2298	125.021	35.5982	25.8245	219.674	0
AT1G15180	432.53	-0.0476155	0.591669	-0.0804766	0.935858	0.99995	490.049	500.084	327.904	716.629	218.138	342.376
AT1G15190	35.3504	-0.0837379	1.49703	-0.0559359	0.955393	0.99995	22.4606	43.5788	43.1189	47.3448	0	55.5995
AT1G15200	1213.65	0.444122	0.382675	1.16057	0.245816	0.811255	1346.95	855.144	883.436	1093.24	1718.99	1384.13
AT1G15210	0	NA	NA	NA	NA	NA	0	0	0	0	0	0
AT1G15215	101.497	-0.389415	2.19738	-0.177218	0.859337	0.99995	117.067	87.1576	141.39	0	0	263.366
AT1G15220	161.601	0.468453	1.60707	0.291494	0.770673	0.997537	127.957	107.161	171.473	249.636	313.381	0
AT1G15230	397.1	0.371666	1.13848	0.326457	0.744079	0.995744	267.485	365.776	405.618	488.513	15.3618	839.845
AT1G15240	396.849	-0.79438	1.10335	-0.719969	0.471544	0.939164	589.419	470.079	451.746	17.2163	176.661	675.973
AT1G15250	194.135	-0.0176135	1.32864	-0.0132567	0.989423	0.99995	189.894	202.891	193.032	344.326	1.53618	233.128
AT1G15260	716.609	-0.621071	0.594313	-1.04502	0.296013	0.833566	950.15	792.991	861.375	931.832	236.572	526.732
AT1G15270	2549.53	1.44004	0.242381	5.94122	2.83e-09	1.03e-06	1320.41	1265.93	1532.22	3925.32	3960.28	3293.05
AT1G15280	726.613	0.823518	0.685487	1.20136	0.229611	0.802157	570.362	502.228	501.884	290.525	1631.43	863.255
AT1G15290	793.02	0.032138	0.42635	0.0753792	0.939913	0.99995	1126.43	675.828	551.019	675.74	864.87	864.23
AT1G15300.1	8.81782	-6.01982	3.76391	-1.59935	0.109743	0.65978	42.8792	0	10.0276	0	0	0
AT1G15310	20.4209	2.65589	2.30967	1.1499	0.250184	0.812501	0	14.2881	2.50691	66.7132	0	39.0172
AT1G15320	0	NA	NA	NA	NA	NA	0	0	0	0	0	0
AT1G15330	0.113437	0.279992	4.08047	0.0686175	0.945294	NA	0.680623	0	0	0	0	0
AT1G15340	1085.06	0.0539616	0.394031	0.136948	0.891072	0.99995	978.055	964.448	1250.95	1082.47	1471.66	762.786
AT1G15350	593.547	0.500194	0.517746	0.966098	0.333995	0.849583	432.876	439.36	602.16	992.089	356.394	738.4
AT1G15360	0	NA	NA	NA	NA	NA	0	0	0	0	0	0
AT1G15370	1027.16	0.096993	0.296868	0.326721	0.743879	0.995744	995.751	1017.31	963.156	1250.33	1112.2	824.238
AT1G15380	27.7438	-5.10262	1.36714	-3.73233	0.000189714	0.009565	66.7011	45.722	50.1382	0	0	3.90172
AT1G15385	0.487715	3.17026	4.03428	0.78583	0.431967	NA	0	0	0	0	0	2.92629
AT1G15390	611.426	0.310892	0.612973	0.507187	0.612024	0.977519	473.714	555.808	607.174	1106.15	267.296	658.415
AT1G15400	856.611	-0.0266054	0.554259	-0.0480019	0.961715	0.99995	777.952	731.552	1082.99	983.481	1181.32	382.368
AT1G15405	9.34383	0.0463559	1.73678	0.0266907	0.978706	0.99995	10.89	15.0025	2.00553	0	7.68091	20.484
AT1G15410	218.849	-0.221449	0.435958	-0.50796	0.611481	0.977354	257.956	183.602	266.234	176.467	156.691	272.145
AT1G15415	9.14285	1.13978	1.97387	0.577437	0.563644	0.9668	2.72249	1.42881	13.0359	6.45611	0	31.2137
AT1G15420	200.271	0.210133	0.556872	0.377345	0.705917	0.991112	96.6485	195.747	264.73	174.315	267.296	202.889
AT1G15430	817.916	0.0630136	0.477155	0.132061	0.894936	0.99995	611.88	1012.31	776.14	609.027	1250.45	647.685
AT1G15440	43.8785	-1.68515	1.61306	-1.04469	0.296167	0.833624	95.9678	49.294	56.1548	4.30408	0	57.5503
AT1G15450	0	NA	NA	NA	NA	NA	0	0	0	0	0	0
AT1G15460	3.51655	-4.69272	3.91474	-1.19873	0.230632	0.802157	21.0993	0	0	0	0	0
AT1G15470	165.433	-0.846906	1.53322	-0.552372	0.580693	0.971349	234.815	183.602	219.104	281.917	0	73.1572
AT1G15480	36.2316	0.910092	2.35002	0.38727	0.698557	0.991112	27.2249	28.5762	19.5539	142.034	0	0
AT1G15490	51.9157	-1.76932	2.08387	-0.849056	NA	NA	28.5862	102.874	109.803	0	0	70.2309
AT1G15500	724.41	-0.696762	0.426861	-1.63229	0.102618	0.64302	1133.24	930.871	622.717	684.348	571.46	403.828
AT1G15510	23.0531	-2.64248	1.85787	-1.42232	0.154934	0.745114	40.1568	35.0059	44.623	0	0	18.5332
AT1G15520	31.1628	-4.21671	1.5742	-2.67864	0.00739215	0.141168	58.5336	36.4347	83.2295	0	0	8.77886
AT1G15530	45.9165	2.13158	2.39515	0.889957	NA	NA	16.335	27.8618	7.01935	0	224.283	0
AT1G15540	1.30974	-3.26442	3.92819	-0.831024	0.40596	NA	0	7.85847	0	0	0	0
AT1G15550	29.0388	0.465705	3.14154	0.148241	0.882153	0.99995	38.7955	34.2915	0	101.146	0	0
AT1G15560.1	1.07602	4.1886	3.97166	1.05462	0.291598	NA	0	0	0	6.45611	0	0
AT1G15570	43.6137	0.456971	2.23779	0.204206	NA	NA	29.9474	41.4356	39.1078	0	0	151.192
AT1G15580	138.075	0.108232	1.00848	0.107321	0.914534	0.99995	115.706	179.316	104.288	12.9122	188.95	227.275
AT1G15590	0.113437	0.279992	4.08047	0.0686175	0.945294	NA	0.680623	0	0	0	0	0
AT1G15600	0	NA	NA	NA	NA	NA	0	0	0	0	0	0
AT1G15610	0	NA	NA	NA	NA	NA	0	0	0	0	0	0
AT1G15620	15.0643	8.03151	3.91134	2.05339	0.0400349	0.408222	0	0	0	90.3856	0	0
AT1G15630	0	NA	NA	NA	NA	NA	0	0	0	0	0	0
AT1G15640	0	NA	NA	NA	NA	NA	0	0	0	0	0	0
AT1G15650	0	NA	NA	NA	NA	NA	0	0	0	0	0	0
AT1G15660	38.2618	-0.978212	1.40665	-0.695418	0.486793	0.947066	87.1197	35.0059	30.5843	0	36.8684	39.9926
AT1G15670	198.694	0.123961	0.975767	0.12704	0.898909	0.99995	149.056	245.756	175.985	25.8245	431.667	163.872
AT1G15680	0	NA	NA	NA	NA	NA	0	0	0	0	0	0
AT1G15690	3630.9	-0.513204	0.317155	-1.61815	0.10563	0.649582	4366.2	4492.19	3949.39	3875.82	2622.26	2479.54
AT1G15700	98.0355	-1.31046	1.5196	-0.862376	0.388481	0.892704	156.543	149.311	112.811	144.187	0	25.3612
AT1G15710	157.248	-0.9219	1.48836	-0.619406	0.535649	0.961149	178.323	190.746	248.184	223.812	0	102.42
AT1G15720	47.0242	-0.107296	2.27065	-0.0472533	0.962311	0.99995	94.6066	17.8602	34.094	0	0	135.585
AT1G15730	835.289	-0.327979	0.474455	-0.691276	0.489392	0.947556	839.208	894.437	1055.91	882.335	391.726	948.117
AT1G15740	1280.21	0.1499	0.413745	0.362301	0.717127	0.992778	1084.91	1155.19	1402.37	1131.97	975.476	1931.35
AT1G15750	480.312	0.789796	0.521455	1.5146	0.129873	0.698615	328.741	450.076	278.267	314.197	731.223	779.368
AT1G15757	0	NA	NA	NA	NA	NA	0	0	0	0	0	0
AT1G15760	0	NA	NA	NA	NA	NA	0	0	0	0	0	0
AT1G15770	0.79406	-2.54263	3.94202	-0.645006	0.518923	NA	4.76436	0	0	0	0	0
AT1G15772	2.72249	-4.32321	3.91707	-1.10369	0.269729	0.822148	16.335	0	0	0	0	0
AT1G15780	78.026	-0.104774	2.21289	-0.0473471	NA	NA	58.5336	108.59	75.7087	0	0	225.324
AT1G15790	50.379	-0.330328	2.19141	-0.150738	0.880182	0.99995	75.5491	36.4347	56.6562	0	0	133.634
AT1G15800	218.895	0.0553878	0.772223	0.0717252	0.942821	0.99995	184.449	220.037	240.664	66.7132	167.444	434.066
AT1G15810	323.914	-0.36617	0.656416	-0.557832	0.576959	0.970626	384.552	360.775	349.965	92.5376	434.739	320.916
AT1G15820	123514	-0.161422	0.492521	-0.327746	0.743104	0.995744	147178	111926	132144	189093	79442.1	81299.1
AT1G15825	2.07859	-0.978135	3.84848	-0.254162	0.799371	0.998906	8.16748	0	0	4.30408	0	0
AT1G15830	31.3187	3.97513	1.68914	2.35335	0.0186052	0.261152	2.72249	8.57287	0	135.578	32.2598	8.77886
AT1G15840	0.775022	-2.51483	3.9427	-0.637844	0.523575	NA	0	2.14322	2.50691	0	0	0
AT1G15850	0	NA	NA	NA	NA	NA	0	0	0	0	0	0
AT1G15860	538.062	0.210447	0.406962	0.517116	0.605075	0.975507	434.237	547.235	513.917	692.956	671.311	368.712
AT1G15870	19.8687	-0.0873502	2.21671	-0.0394054	0.968567	0.99995	23.8218	19.289	18.5511	0	0	57.5503
AT1G15880	1025.42	-0.450655	0.408705	-1.10264	0.270183	0.822639	1199.26	1287.36	1066.94	923.224	542.272	1133.45
AT1G15885	235.574	1.71254	1.16527	1.46966	0.141655	0.725045	200.103	82.8711	47.6313	27.9765	829.538	225.324
AT1G15890	212.64	-0.115149	0.77814	-0.14798	0.882359	0.99995	296.752	222.895	142.894	398.127	73.7367	141.437
AT1G15900	68.0772	1.04398	1.03045	1.01314	0.310993	0.837018	32.6699	33.5771	67.1852	17.2163	201.24	56.5749
AT1G15910	100.387	-0.57017	1.4633	-0.389646	0.696798	0.991112	115.025	135.023	109.803	131.274	0	111.199
AT1G15920	339.351	0.318089	0.591932	0.537374	0.591009	0.97288	295.39	240.04	371.524	159.251	529.983	439.919
AT1G15930	2481.62	-0.415311	0.503047	-0.82559	0.409036	0.907275	3354.11	2672.59	2480.84	3436.8	1334.94	1610.43
AT1G15940	135.103	0.334531	1.53567	0.217841	0.827553	0.99995	155.863	94.3016	108.299	256.092	0	196.061
AT1G15950	433.743	-0.427805	0.302601	-1.41376	0.157432	0.747887	494.813	486.511	509.906	454.08	311.845	345.302
AT1G15960	174.432	5.34637	1.22882	4.3508	1.36e-05	0.00113597	0.680623	9.28728	15.0415	49.4969	319.526	652.562
AT1G15970	317.007	0.134154	0.764492	0.175481	0.860702	0.99995	300.835	278.618	326.901	568.138	78.3453	349.204
AT1G15980	1041.9	0.893433	0.426756	2.09354	0.0363007	0.385871	769.104	663.683	753.578	1971.27	1190.54	903.248
AT1G15990	6.36719	-3.05919	3.20774	-0.953691	0.34024	0.856518	28.5862	5.71525	0	0	0	3.90172
AT1G16000	154.747	-0.0660449	1.25815	-0.0524939	0.958135	0.99995	151.098	112.162	211.082	363.694	4.60855	85.8378
AT1G16010	523.364	-0.408501	0.496643	-0.822524	0.410779	0.908389	613.241	595.1	581.604	473.448	643.66	233.128
AT1G16020	178.697	-1.32027	1.46418	-0.901714	0.367209	0.876605	343.715	250.042	171.974	126.97	0	179.479
AT1G16022	0	NA	NA	NA	NA	NA	0	0	0	0	0	0
AT1G16025	0	NA	NA	NA	NA	NA	0	0	0	0	0	0
AT1G16030	26.3583	-0.796442	2.24243	-0.355168	0.722464	0.994088	33.3505	23.5754	43.1189	58.105	0	0
AT1G16040	306.346	0.215312	0.528573	0.407347	0.683753	0.990923	319.212	245.756	286.791	161.403	373.292	451.624
AT1G16060	65.0106	-0.132209	1.57713	-0.0838292	0.933192	0.99995	126.596	33.5771	43.6203	124.818	0	61.452
AT1G16070	3.8396	-4.82122	3.91406	-1.23177	0.218036	0.795989	0	10.0017	13.0359	0	0	0
AT1G16080	1294.33	-0.138824	0.36985	-0.375353	0.707398	0.991406	1410.25	1181.63	1476.57	1624.79	881.768	1191
AT1G16090	60.5213	-0.978482	1.44536	-0.676979	0.498419	0.950763	115.025	77.1559	48.6341	66.7132	0	55.5995
AT1G16100	0	NA	NA	NA	NA	NA	0	0	0	0	0	0
AT1G16110	735.814	-0.772521	0.367911	-2.09975	0.0357509	0.382464	1167.27	868.718	747.561	677.892	460.855	492.592
AT1G16120	7.59693	-4.22754	2.99962	-1.40936	0.15873	0.750031	0	23.5754	20.0553	0	0	1.95086
AT1G16130	449.033	-0.48411	1.5879	-0.304874	0.760462	0.996633	473.714	565.095	531.967	800.558	0	322.867
AT1G16140	4.0444	-4.8969	3.91369	-1.25122	0.210853	0.794825	0	5.71525	18.5511	0	0	0
AT1G16150	22.3841	-7.36349	1.79171	-4.10975	3.96e-05	0.00283146	74.8685	32.8627	26.5733	0	0	0
AT1G16160	14.7995	3.53129	3.75516	0.940383	0.347021	0.861997	0	0	7.01935	81.7774	0	0
AT1G16170	781.917	-0.0222228	0.263639	-0.0842924	0.932824	0.99995	786.12	687.973	888.45	839.295	783.453	706.211
AT1G16180	2240.48	-0.593641	0.333491	-1.78008	0.0750631	0.556741	2424.38	2509.71	3149.68	2220.9	1379.49	1758.7
AT1G16190	203.954	0.183658	1.24871	0.147078	0.883071	0.99995	140.208	187.174	245.176	350.782	296.483	3.90172
AT1G16210	931.597	-0.0732917	1.64378	-0.0445871	0.964436	0.99995	1082.87	928.014	854.857	1465.54	0	1258.3
AT1G16220	32.6763	-7.91026	1.58375	-4.99463	5.89e-07	8.61e-05	74.1879	42.15	79.7198	0	0	0
AT1G16225	0	NA	NA	NA	NA	NA	0	0	0	0	0	0
AT1G16230	1.07161	-2.97395	3.93295	-0.756164	0.449551	NA	0	6.42966	0	0	0	0
AT1G16240	1841.14	0.643226	0.405064	1.58796	0.112295	0.667368	1134.6	1538.12	1638.02	3025.76	2150.65	1559.71
AT1G16250	91.233	-1.58303	1.62758	-0.972629	0.330738	0.846378	188.533	135.737	86.7392	8.60815	0	127.781
AT1G16260	503.642	0.573287	0.455667	1.25813	0.208345	0.794011	344.395	430.073	440.214	434.712	903.275	469.182
AT1G16270	143.533	-0.21193	0.865315	-0.244917	0.806521	0.998906	217.119	101.446	142.894	262.549	33.796	103.396
AT1G16280	50.5583	-0.568742	1.58139	-0.359646	0.719112	0.992963	42.1986	67.1542	71.6977	30.1285	92.1709	0
AT1G16290	0	NA	NA	NA	NA	NA	0	0	0	0	0	0
AT1G16300	89.6933	-0.134072	0.808631	-0.165801	0.868314	0.99995	138.166	52.8661	90.7502	98.9937	27.6513	129.732
AT1G16310	15.8767	5.09154	3.79412	1.34196	0.17961	0.768179	2.72249	0	0	92.5376	0	0
AT1G16320	1085.98	-0.319025	0.459184	-0.694764	0.487203	0.947066	1201.98	1306.65	1107.55	1304.13	528.447	1067.12
AT1G16330	3.49494	-4.68487	2.74063	-1.70941	0.0873745	0.602	6.80623	7.14406	7.01935	0	0	0
AT1G16340	53.8243	-0.264471	1.55848	-0.169698	0.865248	0.99995	89.8422	43.5788	43.1189	32.2806	0	114.125
AT1G16350	211.335	-1.5912	2.21334	-0.718913	0.472195	0.939362	315.128	389.351	247.182	316.35	0	0
AT1G16360	37.2216	-1.34769	2.1929	-0.614569	0.538839	0.961607	20.4187	94.3016	45.6258	0	62.9835	0
AT1G16370	1398.34	-0.165509	1.73554	-0.0953641	0.924026	0.99995	848.056	2126.07	1461.53	824.23	0	3130.15
AT1G16380	71.1934	1.49889	1.60315	0.934963	0.349807	0.864452	60.5754	33.5771	17.5484	139.882	0	175.577
AT1G16390	98.8222	-3.23586	1.48516	-2.17879	0.0293472	0.341321	133.402	225.752	175.985	51.6489	6.14473	0
AT1G16400	26.8006	-0.831199	2.17471	-0.382212	0.702304	0.991112	35.3924	15.7169	52.1438	0	0	57.5503
AT1G16410	1318.56	-0.611422	0.702699	-0.870104	0.384243	0.889281	2400.56	688.688	1691.16	1820.62	652.877	657.439
AT1G16420	16.254	-1.43168	2.48276	-0.576647	0.564178	0.9668	59.8948	0	11.0304	23.6724	0	2.92629
AT1G16430	98.2475	0.930717	1.49279	0.623475	0.532972	0.960861	56.4917	74.2982	72.1991	0	230.427	156.069
AT1G16440	0.238135	-0.786905	4.02438	-0.195535	0.844974	NA	0	1.42881	0	0	0	0
AT1G16445	20.5249	-7.23802	2.06315	-3.50824	0.000451076	0.0186159	63.9786	52.1517	7.01935	0	0	0
AT1G16450	0	NA	NA	NA	NA	NA	0	0	0	0	0	0
AT1G16460	1233.11	-0.270808	0.291084	-0.930343	0.352193	0.866858	1464.7	1175.2	1404.87	1286.92	914.028	1152.96
AT1G16470	437.701	0.433249	0.691364	0.626658	0.530883	0.960796	509.787	278.618	328.405	602.571	741.976	164.848
AT1G16480	6.68896	-5.62234	2.35428	-2.38813	0.0169343	0.246156	15.6543	6.42966	18.0498	0	0	0
AT1G16489	0	NA	NA	NA	NA	NA	0	0	0	0	0	0
AT1G16490	5.96654	-4.47038	1.93871	-2.30585	0.021119	0.280502	14.2931	10.0017	10.529	0	0	0.975429
AT1G16500	20.4991	-7.23803	1.94649	-3.71851	0.000200402	0.0100031	12.9318	37.8635	72.1991	0	0	0
AT1G16510	88.9363	-1.75348	1.3905	-1.26104	0.207293	0.793797	113.664	108.59	189.021	77.4734	0	44.8697
AT1G16515	8.98828	0.324517	2.61718	0.123995	0.901319	0.99995	15.6543	7.14406	1.00276	30.1285	0	0
AT1G16520	25.42	-0.951704	2.27942	-0.417519	0.676299	0.989879	6.12561	25.0042	69.6922	0	0	51.6978
AT1G16530	2.01592	-3.8934	3.92063	-0.993053	0.320684	0.839253	0	3.57203	8.5235	0	0	0
AT1G16540	88.5657	-0.296695	1.26213	-0.235074	0.814151	0.999752	125.235	72.8694	94.7613	124.818	1.53618	112.174
AT1G16550	17.0573	-0.343988	2.48142	-0.138626	0.889746	0.99995	48.3242	7.14406	2.00553	0	0	44.8697
AT1G16560	321.854	-0.837594	0.42403	-1.97532	0.0482322	0.453034	411.096	370.062	458.264	146.339	299.555	245.808
AT1G16570	106.705	-0.571547	1.25096	-0.456888	0.647751	0.98458	109.58	131.451	141.891	2.15204	196.631	58.5258
AT1G16590	34.9081	-1.40975	1.54577	-0.912006	0.361765	0.873573	67.3817	74.2982	10.529	27.9765	0	29.2629
AT1G16600	0	NA	NA	NA	NA	NA	0	0	0	0	0	0
AT1G16610	473.124	-1.07898	0.966178	-1.11675	0.2641	0.819299	597.587	678.686	649.792	602.571	29.1875	280.924
AT1G16620.1	0	NA	NA	NA	NA	NA	0	0	0	0	0	0
AT1G16630	0.752074	-2.48048	3.94357	-0.628995	0.529352	NA	0	0	4.51244	0	0	0
AT1G16635	8.48383	-4.98854	1.80581	-2.7625	0.00573606	0.117757	21.0993	14.2881	14.5401	0	0	0.975429
AT1G16640	3.15031	-4.53728	3.91565	-1.15876	0.246556	0.812222	0	2.85762	16.0442	0	0	0
AT1G16650	77.3474	-2.45193	1.31622	-1.86285	0.0624829	0.516161	130.68	115.734	146.404	21.5204	0	49.7469
AT1G16660.1	0	NA	NA	NA	NA	NA	0	0	0	0	0	0
AT1G16670	168.819	-0.394981	0.786047	-0.50249	0.615323	0.978086	139.528	198.605	238.157	94.6897	52.2302	289.703
AT1G16680	103.33	0.917134	1.17082	0.783324	0.433437	0.92049	38.7955	89.3008	86.7392	6.45611	261.151	137.536
AT1G16690	162.335	0.800479	1.64199	0.487504	0.625901	0.98063	202.826	110.733	41.6147	421.799	0	197.037
AT1G16700	703.455	0.0113784	0.612373	0.0185809	0.985175	0.99995	519.996	737.267	844.328	1039.43	274.977	804.729
AT1G16705	10.1492	-6.22197	2.29489	-2.71123	0.00670334	0.131672	41.518	12.8593	6.51797	0	0	0
AT1G16710	139.318	-0.00773448	0.628325	-0.0123097	0.990179	0.99995	165.391	182.174	71.6977	105.45	205.848	105.346
AT1G16720	1330.41	-0.39279	0.532732	-0.737313	0.460932	0.933803	1504.86	1533.83	1491.61	1777.58	539.2	1135.4
AT1G16730	238.396	0.189428	0.494866	0.382786	0.701878	0.991112	321.935	167.171	178.492	314.197	264.223	184.356
AT1G16740	455.172	-0.035027	0.397552	-0.0881069	0.929792	0.99995	465.546	440.074	475.311	615.483	310.309	424.312
AT1G16750	120.595	0.328393	1.49151	0.220175	0.825735	0.99995	127.957	95.7304	97.2682	0	271.904	130.708
AT1G16760	1.75396	-1.89876	3.90414	-0.486346	0.626722	NA	0	8.57287	0	0	0	1.95086
AT1G16770	0	NA	NA	NA	NA	NA	0	0	0	0	0	0
AT1G16780	159.77	-0.940546	0.739152	-1.27247	0.203208	0.789324	355.966	166.457	107.296	120.514	156.691	51.6978
AT1G16790	54.2909	0.681568	1.51897	0.448703	0.653646	0.986052	50.3661	42.15	32.5899	101.146	0	99.4938
AT1G16800	35.3581	1.96203	2.3759	0.825806	NA	NA	19.0574	4.28644	20.0553	0	0	168.749
AT1G16810	710.757	0.0442067	0.650285	0.0679806	0.945801	0.99995	782.036	652.967	664.332	1065.26	228.891	871.058
AT1G16820	148.818	0.219793	0.464174	0.473514	0.635846	0.982673	163.35	164.313	85.235	150.643	167.444	161.921
AT1G16825	138.62	0.0710726	0.751327	0.0945961	0.924636	0.99995	154.501	107.875	143.897	118.362	47.6216	259.464
AT1G16830	3.6179	-4.73335	3.91452	-1.20918	0.226595	0.800999	8.8481	12.8593	0	0	0	0
AT1G16840	488.697	-0.395712	0.79314	-0.498919	0.617837	0.978665	446.489	668.684	551.019	503.577	84.49	677.923
AT1G16850	143.494	-0.181636	1.51302	-0.120049	0.904444	0.99995	116.387	189.318	151.919	172.163	0	231.177
AT1G16858	0	NA	NA	NA	NA	NA	0	0	0	0	0	0
AT1G16860	0	NA	NA	NA	NA	NA	0	0	0	0	0	0
AT1G16870	194.375	0.264648	0.671183	0.394301	0.693359	0.991112	179.004	222.18	128.855	109.754	384.045	142.413
AT1G16880	7074.15	-0.596398	0.462876	-1.28846	0.197586	0.78518	9133.96	8129.94	8281.83	8859.94	3759.04	4280.18
AT1G16890	2629.59	0.571047	0.461853	1.23643	0.2163	0.795989	1747.16	2292.53	2308.36	3260.34	1775.83	4393.33
AT1G16900	56.1654	-4.69218	1.53861	-3.04962	0.00229132	0.0604256	78.2716	174.315	72.7004	0	0	11.7052
AT1G16905	0	NA	NA	NA	NA	NA	0	0	0	0	0	0
AT1G16910	0.119068	0.279992	4.08047	0.0686175	0.945294	NA	0	0.714406	0	0	0	0
AT1G16916	201.142	1.54937	0.669486	2.31427	0.020653	0.276827	103.455	85.7287	118.326	116.21	510.012	273.12
AT1G16920	409.516	-0.120006	0.485592	-0.247134	0.804805	0.998906	355.966	373.634	548.512	587.506	294.947	296.531
AT1G16930	52.6025	-1.0226	1.44067	-0.709808	0.477823	0.942649	47.6436	87.872	76.2101	36.5846	0	67.3046
AT1G16940	0.340311	-1.31489	3.98876	-0.329648	0.741666	NA	2.04187	0	0	0	0	0
AT1G16950	0.567186	-2.05556	3.95608	-0.519596	0.603345	NA	3.40311	0	0	0	0	0
AT1G16960	20.5919	-0.653237	2.38935	-0.273395	0.78455	0.998778	4.08374	10.0017	61.67	0	0	47.796
AT1G16970	170.476	1.21277	1.55949	0.777675	0.436761	0.921077	89.8422	110.733	107.797	0	533.055	181.43
AT1G16980	2.38218	-4.13039	3.91854	-1.05406	0.291853	0.831166	14.2931	0	0	0	0	0
AT1G17000	2.276	5.32535	3.93651	1.35281	0.176116	0.763943	0	0	0	0	0	13.656
AT1G17010	0	NA	NA	NA	NA	NA	0	0	0	0	0	0
AT1G17020	51.112	-1.21451	3.04229	-0.39921	0.689738	0.991112	171.517	0	42.6175	92.5376	0	0
AT1G17030	0	NA	NA	NA	NA	NA	0	0	0	0	0	0
AT1G17040	52.0325	-1.9109	1.6827	-1.13561	0.256118	0.814706	60.5754	101.446	85.235	0	1.53618	63.4029
AT1G17050	496.084	-0.345239	1.58714	-0.217523	0.827801	0.99995	651.356	399.353	614.695	731.693	0	579.405
AT1G17060	71.0049	0.266387	1.6135	0.165099	0.868866	0.99995	55.1305	92.8728	45.1244	195.835	0	37.0663
AT1G17070	72.5345	-0.56479	1.66389	-0.339439	NA	NA	108.219	99.3025	52.6452	0	9.21709	165.823
AT1G17080	711.564	-0.937909	1.58778	-0.590704	0.554719	0.965643	716.696	848	1240.42	742.453	0	721.818
AT1G17090	37.3345	-0.287642	2.29132	-0.125535	0.9001	0.99995	40.8374	22.861	59.1631	101.146	0	0
AT1G17100	717.24	-1.32539	0.35101	-3.77594	0.000159404	0.00845992	1276.85	893.722	907.001	320.654	451.637	453.575
AT1G17110	488.325	0.592295	0.62665	0.945177	0.344568	0.860466	339.631	413.641	415.646	221.66	957.041	582.331
AT1G17120	385.525	0.415817	0.63777	0.651987	0.51441	0.955141	354.605	375.063	261.22	337.87	783.453	200.938
AT1G17130	267.765	-0.274402	0.580828	-0.472432	0.636618	0.982804	272.93	302.908	304.339	238.876	109.069	378.467
AT1G17140	354.583	-1.75337	0.776607	-2.25773	0.0239624	0.305303	683.345	442.932	514.92	51.6489	330.279	104.371
AT1G17145	418.664	0.349399	0.798994	0.437299	0.661894	0.98703	263.401	425.072	416.147	213.052	1003.13	191.184
AT1G17147	341.984	-0.692112	0.860028	-0.804756	0.420961	0.914868	144.292	615.818	506.396	512.185	104.46	168.749
AT1G17150	0	NA	NA	NA	NA	NA	0	0	0	0	0	0
AT1G17160	288.149	-0.407803	1.5424	-0.264395	0.791475	0.998906	311.725	331.484	342.444	469.144	0	274.096
AT1G17170	186.396	0.290653	1.70584	0.170387	0.864706	0.99995	253.192	45.0076	204.564	522.945	0	92.6658
AT1G17180	17.5528	0.63128	2.35198	0.268403	0.788389	0.998906	13.6125	0	27.576	49.4969	0	14.6314
AT1G17190	57.9065	-2.07304	1.42661	-1.45312	0.146191	0.732045	75.5491	55.7237	148.911	51.6489	0	15.6069
AT1G17200	1268.17	-0.477419	0.611672	-0.780514	0.435088	0.920817	1591.3	1115.19	1720.24	1923.92	606.792	651.587
AT1G17210	404.523	0.0284818	0.573696	0.0496461	0.960404	0.99995	370.259	483.653	348.962	176.467	465.463	582.331
AT1G17220	887.789	0.350091	0.428219	0.817551	0.413614	0.910252	897.742	750.127	692.91	1428.95	671.311	885.69
AT1G17230	60.7836	-0.103396	2.21886	-0.0465986	0.962833	0.99995	64.6592	35.7203	88.7447	0	0	175.577
AT1G17232	0	NA	NA	NA	NA	NA	0	0	0	0	0	0
AT1G17235	0.238135	-0.786905	4.02438	-0.195535	0.844974	NA	0	1.42881	0	0	0	0
AT1G17240	15.0643	8.03151	3.91134	2.05339	0.0400349	0.408222	0	0	0	90.3856	0	0
AT1G17250	0	NA	NA	NA	NA	NA	0	0	0	0	0	0
AT1G17255	8.83914	-6.02369	2.72882	-2.20743	0.0272837	0.328483	0.680623	29.2907	23.0636	0	0	0
AT1G17260	13.8388	0.0654816	1.72245	0.0380166	0.969674	0.99995	2.72249	17.1457	20.5567	27.9765	0	14.6314
AT1G17270	70.3259	0.772958	1.80533	0.428153	0.668539	0.988797	53.0886	98.5881	4.01106	197.987	0	68.2801
AT1G17275.1	0	NA	NA	NA	NA	NA	0	0	0	0	0	0
AT1G17277.1	2.206	-4.02225	3.91945	-1.02623	0.304785	0.834306	0	5.71525	7.52074	0	0	0
AT1G17280	843.447	-0.199317	0.381467	-0.522501	0.601321	0.975369	886.852	908.725	909.508	602.571	1101.44	651.587
AT1G17285	0	NA	NA	NA	NA	NA	0	0	0	0	0	0
AT1G17290	3760.86	-0.493332	0.4205	-1.1732	0.240714	0.809279	3117.93	6083.17	3993.01	2343.57	3600.81	3426.68
AT1G17300	37.203	-0.465104	1.54503	-0.301033	0.763389	0.996746	19.0574	65.011	45.1244	66.7132	0	27.312
AT1G17310	4.34704	-5.00088	2.79099	-1.79179	0.0731658	0.550731	2.04187	10.0017	14.0387	0	0	0
AT1G17330	239.196	-0.370311	0.334253	-1.10788	0.267915	0.822148	278.375	262.901	267.237	204.444	253.47	168.749
AT1G17340	743.952	0.801849	0.246439	3.25374	0.00113896	0.0365929	579.21	572.239	475.812	996.393	880.232	959.822
AT1G17345	4.36129	-5.00336	3.9132	-1.27859	0.201043	0.788311	19.7381	6.42966	0	0	0	0
AT1G17350	249.129	-0.201208	0.741436	-0.271376	0.786102	0.998906	154.501	372.206	271.749	363.694	256.542	76.0835
AT1G17360	518.125	-1.09714	0.615779	-1.7817	0.0747979	0.55613	794.287	700.832	625.224	178.619	208.921	600.864
AT1G17370	1406.54	0.00984044	0.330827	0.029745	0.97627	0.99995	1325.85	1438.1	1442.48	1022.22	1732.81	1477.78
AT1G17380	3050.36	-0.0837935	0.416541	-0.201165	0.840569	0.99995	2325.69	3079.81	4011.56	3083.87	2058.48	3742.72
AT1G17390.1	0.714406	-2.38639	3.94603	-0.604756	0.545341	NA	0	4.28644	0	0	0	0
AT1G17400	2.17266	-4.00329	3.91962	-1.02135	0.30709	0.835727	0	0	13.0359	0	0	0
AT1G17410	318.588	0.33741	0.433087	0.779081	0.435932	0.921077	254.553	310.052	280.774	221.66	466.999	377.491
AT1G17420	4184.34	0.0897364	0.544703	0.164744	0.869146	0.99995	2799.4	5032.28	4332.45	2423.19	3625.39	6893.36
AT1G17430	33.9759	-0.427764	1.47623	-0.289768	0.771993	0.997537	23.1412	47.1508	46.6286	43.0408	0	43.8943
AT1G17440	153.288	-0.159598	1.54504	-0.103297	0.917727	0.99995	80.3135	182.888	222.112	191.531	0	242.882
AT1G17450	15.3091	-0.780076	2.23414	-0.349162	0.726968	0.994738	27.2249	14.2881	16.5456	0	33.796	0
AT1G17455	87.9357	1.59094	1.44524	1.10082	0.270975	0.823298	40.1568	65.7254	25.5705	124.818	270.368	0.975429
AT1G17460	38.8856	2.49493	1.94866	1.28033	0.200428	0.78775	4.76436	2.14322	28.0774	180.771	0	17.5577
AT1G17470	537.061	0.193217	0.356286	0.542307	0.587607	0.972189	596.226	515.087	392.081	658.523	454.71	605.742
AT1G17480	25.3378	2.83871	3.10402	0.91453	0.360439	0.872328	0	8.57287	10.0276	133.426	0	0
AT1G17490	161.663	0.557877	0.630538	0.884764	0.376284	0.882859	103.455	102.16	186.514	139.882	317.99	119.978
AT1G17495.1	0	NA	NA	NA	NA	NA	0	0	0	0	0	0
AT1G17500	48.4028	-2.27809	1.63431	-1.39392	0.163343	0.751371	86.4391	107.875	47.1299	2.15204	0	46.8206
AT1G17510	110.225	-0.727917	1.486	-0.489851	0.624239	0.98063	101.413	132.165	178.994	83.9295	0	164.848
AT1G17520	355.901	0.225712	0.332375	0.67909	0.497081	0.950222	295.39	385.779	304.339	307.741	417.841	424.312
AT1G17530	150.595	0.317254	0.906925	0.349813	0.726479	0.99461	117.067	144.31	140.888	243.18	23.0427	235.078
AT1G17540	0	NA	NA	NA	NA	NA	0	0	0	0	0	0
AT1G17545	1.24781	-3.19622	3.92922	-0.81345	0.41596	NA	7.48685	0	0	0	0	0
AT1G17550	272.492	1.34419	0.727914	1.84664	0.0648	0.52485	187.852	121.449	152.922	129.122	715.861	327.744
AT1G17560	48.1366	-0.023106	1.55697	-0.0148403	0.98816	0.99995	26.5443	72.155	46.6286	105.45	0	38.0417
AT1G17570	0	NA	NA	NA	NA	NA	0	0	0	0	0	0
AT1G17580	139.29	0.718659	1.54665	0.464655	0.642178	0.984026	131.36	94.3016	90.2488	249.636	0	270.194
AT1G17590	152.802	1.49692	0.694883	2.1542	0.0312246	0.354978	53.7692	90.7296	94.7613	357.238	233.5	86.8132
AT1G17600	27.9661	-0.99915	2.11098	-0.47331	0.635992	0.982673	41.518	33.5771	37.1023	0	0	55.5995
AT1G17610	32.171	-2.31683	2.01328	-1.15077	0.249825	0.812501	59.2142	32.8627	68.6894	0	32.2598	0
AT1G17615	0	NA	NA	NA	NA	NA	0	0	0	0	0	0
AT1G17620	726.21	-0.621849	0.586355	-1.06053	0.288902	0.831166	415.861	1156.62	1069.45	445.472	437.812	832.041
AT1G17630	27.4822	4.47956	2.26086	1.98135	0.047552	0.450237	0	7.14406	0	2.15204	102.924	52.6732
AT1G17640	91.1415	-0.496049	0.718139	-0.690742	0.489728	0.94764	134.083	104.303	82.2267	73.1693	29.1875	123.88
AT1G17650	281.968	0.105256	0.507735	0.207305	0.835772	0.99995	411.096	194.318	209.578	269.005	371.756	236.054
AT1G17660	0	NA	NA	NA	NA	NA	0	0	0	0	0	0
AT1G17665	0	NA	NA	NA	NA	NA	0	0	0	0	0	0
AT1G17670	0	NA	NA	NA	NA	NA	0	0	0	0	0	0
AT1G17680	218.058	0.249084	0.386358	0.644696	0.519124	0.95617	194.658	163.599	239.159	219.508	293.411	198.012
AT1G17690	57.9465	-1.45228	2.16694	-0.670196	0.502733	0.951669	83.7166	150.74	20.5567	0	0	92.6658
AT1G17700	14.6097	-6.748	1.90096	-3.54978	0.000385548	0.0165604	44.2405	22.861	20.5567	0	0	0
AT1G17710	15.3725	-6.82155	2.5625	-2.66207	0.00776624	0.147206	78.2716	1.42881	12.5346	0	0	0
AT1G17720	696.795	1.94517	0.500536	3.88618	0.000101834	0.00587409	314.448	356.489	191.528	667.132	1506.99	1144.18
AT1G17730	546.398	0.301806	0.726883	0.415206	0.677991	0.990267	486.645	531.518	450.241	813.47	145.937	850.574
AT1G17744	0.162572	2.17884	4.0769	0.534437	0.593039	NA	0	0	0	0	0	0.975429
AT1G17745	211.007	-2.26193	1.43711	-1.57395	0.1155	0.671657	497.535	160.741	389.073	137.73	0	80.9606
AT1G17750	41.165	-1.55084	2.04676	-0.757708	0.448626	0.926027	51.7273	67.1542	65.6811	0	0	62.4275
AT1G17760	183.897	0.0861452	1.53648	0.0560667	0.955289	0.99995	144.973	212.179	177.991	329.262	0	238.98
AT1G17770	0.113437	0.279992	4.08047	0.0686175	0.945294	NA	0.680623	0	0	0	0	0
AT1G17780	226.757	0.239598	0.768223	0.311886	0.755127	0.996427	274.972	147.168	202.558	62.4091	305.7	367.737
AT1G17790	103.518	-0.582312	0.765963	-0.760235	0.447114	0.924624	114.345	105.018	152.42	139.882	24.5789	84.8624
AT1G17800	0	NA	NA	NA	NA	NA	0	0	0	0	0	0
AT1G17810	0.488827	-1.85078	3.96353	-0.466951	0.640535	NA	0	1.42881	1.50415	0	0	0
AT1G17820	74.4039	0.00694771	0.901182	0.00770955	0.993849	0.99995	67.3817	57.8669	97.7696	15.0643	135.184	73.1572
AT1G17830	132.362	-0.195141	0.732439	-0.266426	0.789911	0.998906	81.6748	199.319	143.897	49.4969	119.822	199.963
AT1G17840	544.474	-1.28736	0.546876	-2.35402	0.0185715	0.260984	573.765	852.287	889.452	522.945	208.921	219.472
AT1G17850	72.5464	-0.886849	1.46948	-0.603512	0.546168	0.964216	55.1305	119.306	107.797	103.298	0	49.7469
AT1G17860	157.486	-1.1708	0.491708	-2.38109	0.0172617	0.248953	200.103	225.752	227.126	111.906	124.431	55.5995
AT1G17870	136.249	0.727362	1.04246	0.697738	0.485341	0.946921	70.7848	140.738	96.2654	264.701	13.8256	231.177
AT1G17880	3139.59	-0.133409	0.413331	-0.322765	0.746873	0.995872	3812.85	3106.24	2933.09	4269.64	2657.59	2058.16
AT1G17890	233.83	-1.15183	1.48123	-0.777615	0.436796	0.921077	345.756	371.491	250.19	245.332	0	190.209
AT1G17900.1	0	NA	NA	NA	NA	NA	0	0	0	0	0	0
AT1G17910	1.99037	-3.87007	3.92086	-0.987047	0.32362	0.840479	4.08374	7.85847	0	0	0	0
AT1G17920	47.5029	1.04571	2.33559	0.447728	NA	NA	23.1412	20.7178	49.1355	0	192.023	0
AT1G17930	115.407	0.974392	0.905511	1.07607	0.281896	0.82868	81.6748	104.303	47.6313	75.3213	331.815	51.6978
AT1G17940	269.634	1.11156	0.921906	1.20572	0.227926	0.801788	165.391	145.024	201.556	60.2571	788.061	257.513
AT1G17950	0	NA	NA	NA	NA	NA	0	0	0	0	0	0
AT1G17960	1.92197	-3.82696	3.92129	-0.975946	0.329091	NA	0	0	11.5318	0	0	0
AT1G17970	559.44	0.327943	0.355569	0.922305	0.35637	0.870102	385.913	574.383	528.457	639.155	496.187	732.547
AT1G17980	1136.39	1.31971	0.581414	2.26983	0.023218	0.299441	558.111	685.83	706.949	630.547	2003.18	2233.73
AT1G17990	11.3061	2.47878	1.10304	2.24723	0.0246252	0.311567	2.04187	2.14322	6.01659	21.5204	10.7533	25.3612
AT1G18000	4.22948	2.66698	1.72918	1.54234	0.122991	0.685802	0.680623	0.714406	2.00553	2.15204	16.898	2.92629
AT1G18010	6.41905	3.29406	1.54884	2.12679	0.0334373	0.369157	2.04187	0	1.50415	8.60815	10.7533	15.6069
AT1G18020	162.035	3.13103	0.663047	4.72218	2.33e-06	0.000266882	26.5443	35.0059	38.1051	118.362	465.463	288.727
AT1G18030	474.209	0.873849	0.447068	1.95462	0.0506278	0.463712	300.155	320.768	384.56	391.671	576.068	872.034
AT1G18040	130.446	0.178836	1.53163	0.116762	0.907049	0.99995	153.821	107.875	105.29	262.549	0	153.142
AT1G18050	0	NA	NA	NA	NA	NA	0	0	0	0	0	0
AT1G18060	4041.56	-0.0722214	0.520701	-0.1387	0.889687	0.99995	4685.41	3674.19	4067.21	6428.14	2159.87	3234.52
AT1G18070	918.555	0.191587	0.338615	0.565797	0.571532	0.968898	888.894	1006.6	677.869	858.663	1193.61	885.69
AT1G18075	1.36473	-3.32743	3.84771	-0.864782	0.387159	NA	0.680623	5.00084	2.50691	0	0	0
AT1G18080	1336.07	-0.109952	0.632919	-0.173723	0.862083	0.99995	1634.86	1130.19	1394.34	2373.7	875.624	607.692
AT1G18090	28.8548	0.215252	2.27283	0.0947068	0.924548	0.99995	49.6855	0	30.5843	0	24.5789	68.2801
AT1G18100	1.24781	-3.19622	3.92922	-0.81345	0.41596	NA	7.48685	0	0	0	0	0
AT1G18120	0	NA	NA	NA	NA	NA	0	0	0	0	0	0
AT1G18130	4.65092	-5.09631	3.9128	-1.30247	0.192755	0.780756	27.9055	0	0	0	0	0
AT1G18140	10.6964	0.0172879	3.74383	0.0046177	0.996316	0.99995	31.9893	0	0	0	0	32.1892
AT1G18150	226.313	-0.68343	1.12729	-0.606259	0.544343	0.963215	287.223	198.605	351.469	6.45611	288.802	225.324
AT1G18160	567.163	0.982806	0.66623	1.47517	0.140166	0.722357	350.521	468.65	324.394	348.63	1424.04	486.739
AT1G18170	713.345	-0.0785813	0.498709	-0.157569	0.874796	0.99995	711.932	657.968	827.281	794.102	938.607	350.179
AT1G18180	34.1382	-1.30921	2.16601	-0.604434	0.545555	0.963971	98.0097	20.7178	27.576	0	0	58.5258
AT1G18190	153.466	0.622982	1.61005	0.386933	0.698806	0.991112	80.3135	145.024	137.379	116.21	0	441.869
AT1G18191	6.42966	-5.56335	3.91113	-1.42244	0.154898	0.745114	0	38.5779	0	0	0	0
AT1G18200	380.945	0.186424	0.513146	0.363296	0.716384	0.99273	279.736	418.642	372.026	228.116	390.19	596.963
AT1G18210	2077.95	-0.33034	0.529279	-0.624133	0.532541	0.960861	1581.09	2647.59	2715.99	2111.15	929.39	2482.47
AT1G18220	0	NA	NA	NA	NA	NA	0	0	0	0	0	0
AT1G18230	0	NA	NA	NA	NA	NA	0	0	0	0	0	0
AT1G18240.1	0	NA	NA	NA	NA	NA	0	0	0	0	0	0
AT1G18250	8.17099	-5.91047	2.41843	-2.44393	0.0145283	0.223176	27.9055	3.57203	17.5484	0	0	0
AT1G18260	330.151	0.906662	0.856127	1.05903	0.289588	0.831166	151.098	296.479	241.666	111.906	912.492	267.268
AT1G18265	98.4712	1.92098	1.56163	1.23011	0.218655	0.796074	49.6855	22.1466	51.6424	0	310.309	157.044
AT1G18270	373.893	-0.260922	0.721969	-0.361403	0.717798	0.992778	370.259	574.383	278.769	352.934	109.069	557.946
AT1G18280	0.119068	0.279992	4.08047	0.0686175	0.945294	NA	0	0.714406	0	0	0	0
AT1G18290	14.3171	0.431589	2.41877	0.178433	0.858383	0.99995	8.16748	20.7178	7.52074	49.4969	0	0
AT1G18300	2805.09	0.381193	0.351931	1.08315	0.278743	0.827476	2580.24	2560.43	2170.99	2223.05	3325.83	3970
AT1G18310	34.0516	1.06538	1.83204	0.581526	0.560886	0.966159	28.5862	35.7203	2.00553	0	19.9704	118.027
AT1G18320	6.70237	-3.05477	2.00662	-1.52234	0.127924	0.695983	4.76436	15.0025	16.5456	0	0	3.90172
AT1G18330	150.357	-0.384564	0.775064	-0.496171	0.619774	0.97958	218.48	148.596	144.398	34.4326	219.674	136.56
AT1G18335	213.566	0.107318	0.523093	0.205159	0.837448	0.99995	172.198	266.474	179.495	137.73	199.704	325.793
AT1G18340	123.692	-0.28297	0.53353	-0.530374	0.595853	0.974873	140.208	150.74	115.819	159.251	62.9835	113.15
AT1G18350	0	NA	NA	NA	NA	NA	0	0	0	0	0	0
AT1G18360	365.06	0.353854	1.21215	0.291922	0.770346	0.997537	300.155	261.473	399.602	841.447	9.21709	378.467
AT1G18370	0	NA	NA	NA	NA	NA	0	0	0	0	0	0
AT1G18382	3.96678	0.760395	2.87097	0.264856	0.79112	0.998906	6.80623	1.42881	0.501382	15.0643	0	0
AT1G18390	406.802	-0.515549	0.559228	-0.921894	0.356584	0.870153	315.128	667.97	451.746	501.425	302.628	201.914
AT1G18400	138.552	-1.42424	1.45118	-0.981435	0.326378	0.843528	298.113	190.746	116.822	107.602	0	118.027
AT1G18410	5.68999	-0.555038	2.6635	-0.208386	0.834927	0.99995	2.72249	0.714406	17.047	0	0	13.656
AT1G18415	6.94509	-0.15348	2.36086	-0.0650104	0.948166	0.99995	11.5706	3.57203	7.01935	0	0	19.5086
AT1G18420	0	NA	NA	NA	NA	NA	0	0	0	0	0	0
AT1G18430	0	NA	NA	NA	NA	NA	0	0	0	0	0	0
AT1G18440	187.852	0.214105	1.55455	0.137728	0.890455	0.99995	120.47	239.326	161.947	350.782	0	254.587
AT1G18450	507.547	-0.728499	0.875598	-0.832002	0.405408	0.903736	660.204	664.398	574.083	667.132	52.2302	427.238
AT1G18460	1052.27	0.350313	0.600585	0.583286	0.559701	0.966159	886.852	1012.31	876.918	1140.58	468.535	1928.42
AT1G18470	817.223	-0.0955169	0.551358	-0.173239	0.862463	0.99995	398.845	1043.03	1091.51	557.378	866.407	946.166
[truncated: 31,611 more rows]
