# Supplementary material for: Companion cells with high florigen production express other small proteins and reveal a nitrogen-sensitive FT repressor
Source: bioRxiv preprint, doi:10.1101/2024.08.17.608367, version 2 (2025-08-08)
Supplement: Supplemental data 5 [file 608367_file07.xlsx]

## Sheet: DataS5_35St_v_SUCt
Row.names	baseMean	log2FoldChange	lfcSE	stat	pvalue	padj	35S_T1.counts	35S_T2.counts	35S_T3.counts	SUC2_T1.counts	SUC2_T3.counts	SUC2_T5.counts
AT1G01010	31.3545	0.000734487	0.942835	0.000779019	0.999378	0.999905	19.5475	16.1967	58.1087	33.414	15.7194	45.1404
AT1G01020	859.975	0.4565	0.278201	1.6409	0.100819	0.28955	665.429	803.869	705.692	759.305	1290.3	935.252
AT1G01030	338.964	2.26049	0.430598	5.24965	1.52e-07	5.32e-06	121.357	80.9837	148.567	869.917	489.921	323.036
AT1G01040	306.155	0.595589	0.408088	1.45946	0.144438	0.364359	328.235	202.033	201.284	246.573	535.769	323.036
AT1G01046	0	NA	NA	NA	NA	NA	0	0	0	0	0	0
AT1G01050	1504.73	-1.24473	0.243401	-5.11391	3.16e-07	9.99e-06	2670.68	1913.77	1764.83	894.113	837.058	947.948
AT1G01060	144.747	-0.382622	0.489555	-0.781571	0.434467	0.690754	250.86	134.689	106.033	115.221	119.205	142.474
AT1G01070	5.81944	0.202472	2.70668	0.0748044	0.94037	0.97591	0	0	16.1746	0	13.0995	5.64255
AT1G01073	0	NA	NA	NA	NA	NA	0	0	0	0	0	0
AT1G01080	468.984	-1.25466	0.330494	-3.79632	0.000146859	0.00191946	849.502	547.279	585.88	263.856	216.142	351.249
AT1G01090	1688.93	-1.30028	0.216922	-5.99421	2.04e-09	1.24e-07	2704.07	2259.02	2244.08	1001.27	867.187	1057.98
AT1G01100	1398.94	-0.921602	0.263814	-3.49337	0.000476957	0.00507142	2113.57	1716.85	1662.39	783.501	844.917	1272.39
AT1G01110	24.1355	-1.35349	1.2569	-1.07684	0.28155	0.545991	11.4027	28.9836	63.5003	5.76104	1.30995	33.8553
AT1G01115	1.5389	3.38924	3.94744	0.858591	0.390566	NA	0	0.852459	0	5.76104	2.6199	0
AT1G01120	1455.33	1.10254	0.347651	3.17139	0.00151713	0.0130666	512.307	912.984	1348.48	2499.14	1392.48	2066.58
AT1G01130	540.614	1.38355	0.473716	2.92063	0.0034932	0.0255027	399.909	198.623	300.129	451.666	1482.86	410.495
AT1G01140	7241.05	1.17439	0.192823	6.0905	1.13e-09	7.15e-08	4659.63	4583.67	4096.37	8647.32	11057.3	10402
AT1G01150	17.0942	-0.149594	1.59744	-0.093646	0.92539	0.969541	48.0543	1.70492	4.19341	1.15221	43.2283	4.23191
AT1G01160	770.181	-0.0146434	0.282121	-0.0519045	0.958605	0.982524	778.642	830.296	713.479	661.367	1015.21	622.091
AT1G01170	1307.86	-0.295678	0.282516	-1.04659	0.29529	0.561178	1810.59	1242.03	1271.8	1319.28	825.268	1378.19
AT1G01180	208.502	-0.0709985	0.489178	-0.145138	0.884602	0.952408	111.584	242.098	286.949	218.92	119.205	272.253
AT1G01183	3.25016	-0.897446	2.83642	-0.316401	0.751698	NA	0	4.2623	8.38683	0	2.6199	4.23191
AT1G01190	11.0375	-1.81483	1.92944	-0.940603	0.346908	0.615913	0	20.459	31.1511	8.06546	6.54975	0
AT1G01200	17.6261	1.36522	1.77311	0.769957	0.441325	0.696116	22.8054	6.81968	0	25.3486	0	50.7829
AT1G01210	143.353	-0.471303	0.519755	-0.90678	0.364523	0.632666	147.421	188.394	163.543	82.959	74.6671	203.132
AT1G01220	286.184	0.439401	0.411355	1.06818	0.28544	0.54974	271.222	244.656	212.666	179.744	341.897	466.921
AT1G01225	51.0675	-2.19895	0.998445	-2.20237	0.027639	0.120311	121.357	69.9017	60.505	21.892	32.7487	0
AT1G01230	700.23	-0.0698006	0.301497	-0.231513	0.816916	0.924575	514.751	842.23	794.352	727.043	534.459	788.546
AT1G01240	1498.78	0.433973	0.277054	1.56638	0.117259	0.31873	1514.93	1054.49	1256.23	2214.54	1725.2	1227.25
AT1G01250	59.0071	-0.573192	0.732183	-0.782853	0.433713	0.690081	83.8913	24.7213	103.038	50.6972	55.0179	36.6766
AT1G01260	467.657	0.46817	0.401513	1.16601	0.243609	0.500495	324.163	418.558	434.917	887.2	305.218	435.887
AT1G01270	3.67163	4.02953	2.68281	1.50198	0.133102	NA	0	0	1.19812	4.60883	9.16965	7.05319
AT1G01280	0	NA	NA	NA	NA	NA	0	0	0	0	0	0
AT1G01290	568.518	-0.195022	0.315982	-0.617193	0.537107	0.769063	669.502	644.459	506.804	415.947	724.402	449.993
AT1G01300	467.939	-0.621979	0.3269	-1.90266	0.0570852	0.198174	480.543	554.099	666.753	367.554	263.3	475.385
AT1G01305	3.7011	2.95948	3.50444	0.844494	0.398394	NA	0	2.55738	0	0	19.6492	0
AT1G01310	21.73	1.58346	1.56924	1.00907	0.312943	0.579536	0	31.541	1.19812	26.5008	65.4975	5.64255
AT1G01320	2547.01	1.07803	0.276282	3.90192	9.54e-05	0.00133858	2219.46	1510.56	1182.54	2784.89	4152.54	3432.08
AT1G01340	27.3418	2.55312	1.06414	2.39924	0.0164292	0.0829415	1.62896	14.4918	7.78777	47.2405	20.9592	71.9425
AT1G01350	214.005	-0.0652539	0.43116	-0.151345	0.879704	0.950299	182.443	233.574	240.822	284.595	222.691	119.904
AT1G01355	7.3361	1.16067	2.52294	0.460048	0.645482	0.838212	0	13.6394	0	9.21766	0	21.1596
AT1G01360	469.062	1.47568	0.353839	4.17049	3.04e-05	0.00051497	223.167	220.787	300.129	941.354	434.903	694.033
AT1G01370	29.6286	-0.257189	1.21834	-0.211097	0.832811	0.930131	34.2081	41.7705	20.9671	50.6972	30.1288	0
AT1G01380	28.2179	1.73711	0.979309	1.77381	0.0760942	0.24033	12.2172	20.459	6.58965	78.3501	24.889	26.8021
AT1G01390	21.7745	1.93031	1.60437	1.20316	0.228913	0.48151	0	0	26.9577	34.5662	36.6786	32.4447
AT1G01400	3.94819	3.56902	3.41262	1.04583	0.29564	NA	0	0	1.79718	21.892	0	0
AT1G01410	0.8733	3.66751	3.97188	0.923369	0.355815	NA	0	0	0	0	5.2398	0
AT1G01420	183.122	0.821765	0.43357	1.89534	0.0580469	0.200571	191.403	108.262	97.6466	254.638	243.651	203.132
AT1G01430	3536.75	0.0131515	0.209055	0.062909	0.949839	0.979254	3446.06	3434.56	3680.62	2913.93	4117.17	3628.16
AT1G01440	264.025	-0.0715193	0.373414	-0.191528	0.848112	0.936875	241.9	240.394	329.482	339.901	209.592	222.881
AT1G01448	529.449	0.318877	0.31416	1.01501	0.310099	0.576288	599.457	460.328	354.044	501.211	708.683	552.97
AT1G01450	0	NA	NA	NA	NA	NA	0	0	0	0	0	0
AT1G01453	1.49321	-3.65482	3.92919	-0.930171	0.352282	NA	8.95927	0	0	0	0	0
AT1G01460	181.867	0.599343	0.48716	1.23028	0.218593	0.468598	180.814	156	97.0476	120.982	216.142	320.215
AT1G01470	13244.4	0.739444	0.306496	2.41258	0.0158403	0.0807376	6185.97	11842.4	11739.8	23634.1	11838	14226.3
AT1G01471	4.04202	-3.0477	2.9941	-1.0179	0.308725	0.575371	11.4027	10.2295	0	0	2.6199	0
AT1G01480	98.3642	0.680976	0.623327	1.09249	0.27462	0.537908	137.647	48.5902	40.736	139.417	134.925	88.8701
AT1G01490	1570.55	0.362159	0.277863	1.30337	0.192448	0.434748	1475.84	1547.21	1100.47	1273.19	2322.54	1704.05
AT1G01500	300.792	0.0312968	0.392602	0.0797163	0.936463	0.97396	305.43	277.902	309.714	458.579	252.82	200.31
AT1G01510	338.479	-0.0291855	0.323576	-0.0901966	0.928131	0.970833	360	309.443	355.841	277.682	311.768	416.138
AT1G01520	390.412	2.38753	0.410833	5.81144	6.19e-09	3.34e-07	189.774	61.3771	124.604	763.914	556.729	646.072
AT1G01530	9.77895	0.945833	1.98392	0.476749	0.633541	0.832316	0	11.082	8.98589	24.1964	14.4094	0
AT1G01540	1025.87	0.169028	0.257744	0.655799	0.511954	0.749917	1175.29	798.755	923.749	1151.06	1189.43	916.914
AT1G01550	5065.96	0.0607266	0.224833	0.270097	0.787086	0.911444	3696.11	5494.95	5686.87	5568.62	5102.25	4846.95
AT1G01560	259.249	-0.395313	0.401029	-0.985747	0.324257	0.590968	262.262	289.836	331.28	154.396	330.107	187.615
AT1G01570	46.2072	-0.19026	0.79016	-0.240786	0.809721	0.9215	27.6923	49.4427	70.689	72.5891	31.4388	25.3915
AT1G01580	0	NA	NA	NA	NA	NA	0	0	0	0	0	0
AT1G01590	5.68123	-0.434088	2.34302	-0.185268	0.853019	0.938678	0	13.6394	5.99059	9.21766	5.2398	0
AT1G01600	9.1847	-2.09219	1.93089	-1.08353	0.278571	0.542586	16.2896	18.7541	9.58494	0	10.4796	0
AT1G01610	727.755	0.68758	0.29317	2.34533	0.0190104	0.0921807	434.117	491.869	745.828	914.853	793.829	986.035
AT1G01620	6549.09	-0.139723	0.258101	-0.54135	0.588266	0.804027	5105.15	6338.04	9154.22	6280.69	7377.64	5038.8
AT1G01630	858.811	-0.114011	0.264933	-0.430339	0.666949	0.84922	731.402	900.197	1046.56	897.57	898.625	678.516
AT1G01640	24.4838	2.05793	1.37613	1.49545	0.134797	0.349054	0	25.5738	2.9953	46.0883	14.4094	57.8361
AT1G01650	1358.14	1.57862	0.312393	5.05332	4.34e-07	1.31e-05	483.801	845.64	714.677	2724.97	1359.73	2020.03
AT1G01660	16.906	2.3896	2.37882	1.00453	0.315122	0.58176	16.2896	0	0	0	85.1467	0
AT1G01670	16.1846	0.102241	2.11811	0.0482701	NA	NA	0	0	46.7266	0	23.5791	26.8021
AT1G01680	0.470212	2.75951	4.02805	0.685074	0.493297	NA	0	0	0	0	0	2.82127
AT1G01690	18.4424	0.370368	1.71829	0.215545	0.829343	0.928699	23.6199	0	24.5614	0	31.4388	31.034
AT1G01695	4.80315	6.12808	3.54599	1.72817	0.083957	0.256043	0	0	0	0	28.8189	0
AT1G01700	51.1968	2.58562	1.01067	2.55833	0.0105175	0.0594486	8.14479	23.8689	11.9812	195.875	60.2577	7.05319
AT1G01710	549.585	0.631387	0.302905	2.08444	0.0371203	0.147777	474.841	517.443	301.926	621.04	699.513	682.748
AT1G01720	7054.56	0.612048	0.265071	2.30899	0.0209439	0.0987488	3596.74	6973.12	6170.91	10061.1	8166.23	7359.29
AT1G01725	1044.25	0.624984	0.455217	1.37293	0.169773	0.402021	1173.66	732.263	558.922	769.675	2428.65	602.342
AT1G01730	737.926	-0.0305495	0.429162	-0.0711841	0.943251	0.976567	666.244	919.804	651.177	392.903	1354.49	442.94
AT1G01740	89.4346	0.788254	0.590208	1.33555	0.181696	0.419641	100.181	36.6558	59.9059	89.8722	142.784	107.208
AT1G01750	34.4512	-0.803243	0.987267	-0.813602	0.415873	0.675001	87.1493	30.6885	13.7784	40.3273	24.889	9.87446
AT1G01760	93.0701	0.0920742	0.560057	0.164401	0.869415	0.946182	86.3348	103.148	80.873	73.7413	148.024	66.2999
AT1G01770	570.507	0.527261	0.338961	1.55552	0.119822	0.323034	530.226	552.394	320.497	896.418	615.676	507.829
AT1G01780	187.114	1.13717	0.46315	2.4553	0.0140766	0.0742309	68.4162	147.475	134.788	226.985	195.182	349.838
AT1G01790	1208.01	0.0338341	0.216093	0.156572	0.875582	0.948784	1194.84	1093.71	1292.77	1269.73	1169.78	1227.25
AT1G01800	1209.65	-0.45822	0.226969	-2.01886	0.0435015	0.164615	1362.62	1343.48	1494.65	1123.4	1067.61	866.131
AT1G01810	42.9056	0.976954	0.80296	1.21669	0.223722	0.475258	15.4751	38.3607	32.9482	78.3501	65.4975	26.8021
AT1G01820	399.834	-0.84396	0.292299	-2.88732	0.00388534	0.0277123	537.556	523.41	479.846	275.378	327.487	255.325
AT1G01830	408.305	0.860934	0.285666	3.01378	0.00258016	0.020036	302.986	254.033	312.709	549.603	522.67	507.829
AT1G01840	60.4682	-1.0547	0.699379	-1.50805	0.131542	0.343231	109.955	39.2131	95.8494	53.0016	37.9885	26.8021
AT1G01860	96.5142	-0.87136	0.539681	-1.61458	0.106401	0.299614	132.76	121.902	119.812	59.9148	99.5562	45.1404
AT1G01870	0	NA	NA	NA	NA	NA	0	0	0	0	0	0
AT1G01880	15.5434	1.61675	1.82758	0.884642	0.37635	0.642508	0	23.0164	0	24.1964	6.54975	39.4978
AT1G01890	0	NA	NA	NA	NA	NA	0	0	0	0	0	0
AT1G01900	19.4952	-0.09814	1.7499	-0.056083	0.955276	0.981244	55.3846	5.11476	0	1.15221	51.088	4.23191
AT1G01910	734.908	-0.370653	0.261142	-1.41936	0.155795	0.381211	740.361	785.968	959.693	589.931	746.671	586.825
AT1G01920	146.851	0.1611	0.446073	0.361152	0.717985	0.876618	124.615	184.984	106.633	149.787	176.843	138.242
AT1G01930	128.082	-0.127318	0.459528	-0.277063	0.781732	0.909941	114.842	147.475	138.982	130.2	146.714	90.2808
AT1G01940	153.419	-0.555504	0.496347	-1.11918	0.263062	0.524559	229.683	190.951	127.6	157.853	146.714	67.7106
AT1G01950	897.717	1.44513	0.243602	5.93232	2.99e-09	1.77e-07	394.208	529.377	522.979	1322.73	1281.13	1335.87
AT1G01960	202.865	-0.321519	0.457414	-0.702905	0.482115	0.729154	291.583	190.951	194.095	279.987	133.615	126.957
AT1G01970	148.186	-1.18083	0.552325	-2.13793	0.0325226	0.134478	217.466	234.426	164.741	32.2618	123.135	117.083
AT1G01980	2.11596	4.94179	3.93382	1.25623	0.209032	NA	0	0	0	0	0	12.6957
AT1G01990	392.745	-0.500836	0.341539	-1.46641	0.142537	0.361067	495.203	521.705	364.228	319.162	419.184	236.987
AT1G02000	312.796	-0.480061	0.403804	-1.18885	0.2345	0.489234	260.633	313.705	518.186	183.201	347.137	253.915
AT1G02010	232.6	0.800819	0.405317	1.97579	0.0481789	0.176574	165.339	199.476	144.373	256.942	417.874	211.596
AT1G02020	278.803	-1.11858	0.372658	-3.00163	0.00268537	0.0206884	307.873	446.689	391.186	232.746	134.925	159.402
AT1G02030	14.5896	-1.23981	1.95861	-0.633004	0.526731	0.761531	51.3122	0	10.184	1.15221	24.889	0
AT1G02040	0.798745	-2.76839	3.9481	-0.701196	0.483181	NA	0	0	4.79247	0	0	0
AT1G02050	54.1438	-1.25725	0.713971	-1.76092	0.078252	0.244824	91.2217	44.3279	93.4532	38.0229	18.3393	39.4978
AT1G02060	9.52344	-6.33328	2.55087	-2.48279	0.0130358	0.0699429	0	6.81968	50.321	0	0	0
AT1G02065	17.5277	-0.978421	1.65957	-0.589564	0.555483	0.781982	0	61.3771	8.38683	11.5221	1.30995	22.5702
AT1G02070	1.27869	-3.42852	3.93298	-0.871736	0.383353	NA	0	7.67214	0	0	0	0
AT1G02074	0	NA	NA	NA	NA	NA	0	0	0	0	0	0
AT1G02080	371.588	1.09431	0.355909	3.0747	0.00210715	0.0168908	288.326	252.328	170.732	388.294	478.132	651.714
AT1G02090	511.991	0.0980951	0.32489	0.301933	0.762703	0.901238	574.208	503.804	406.162	504.667	700.823	382.283
AT1G02100	1361.57	0.666811	0.214674	3.10616	0.00189533	0.0155394	1183.44	988.001	986.051	1727.16	1659.71	1625.05
AT1G02110	213.303	-0.254831	0.441441	-0.577272	0.563756	0.787677	285.068	212.262	199.487	293.813	165.054	124.136
AT1G02120	1375.67	0.831706	0.255665	3.25311	0.00114149	0.0103963	1014.03	984.591	970.476	1333.1	2267.52	1684.3
AT1G02130	824.039	-1.03973	0.262785	-3.9566	7.6e-05	0.00110565	1002.62	1294.03	1029.18	451.666	530.53	636.197
AT1G02136	3.93665	-5.05503	3.84261	-1.31552	0.188335	NA	23.6199	0	0	0	0	0
AT1G02140	2702.94	-0.269749	0.195507	-1.37974	0.167666	0.399099	2620.18	3096.13	3148.06	2403.51	2424.72	2525.04
AT1G02145	510.598	0.259198	0.281394	0.921122	0.356987	0.625527	413.755	470.558	509.799	462.035	624.846	582.593
AT1G02150	1033.98	-1.71651	0.274338	-6.25692	3.93e-10	2.84e-08	1572.76	1676.79	1507.23	448.209	640.565	358.302
AT1G02160	376.837	0.298243	0.344564	0.865567	0.386728	0.65117	374.66	285.574	353.445	283.443	526.6	437.297
AT1G02170	820.036	-0.147853	0.313138	-0.472167	0.636808	0.834158	673.574	843.935	1068.72	1065.79	586.857	681.338
AT1G02180	56.901	-0.434025	0.926416	-0.468498	0.639428	0.835129	101.81	80.1312	14.3774	28.8052	102.176	14.1064
AT1G02190	16.5391	4.85341	1.95414	2.48365	0.0130042	0.0697995	0	3.40984	0	0	37.9885	57.8361
AT1G02205	712.557	0.730144	0.298278	2.44786	0.0143707	0.0753068	617.375	417.705	572.7	793.871	1151.45	722.246
AT1G02210	0	NA	NA	NA	NA	NA	0	0	0	0	0	0
AT1G02220	92.726	-0.152785	0.564442	-0.270684	0.786634	0.911334	90.4072	126.164	76.6796	130.2	69.4273	63.4787
AT1G02228.1	2.57918	-4.44447	3.91975	-1.13386	0.256852	NA	15.4751	0	0	0	0	0
AT1G02230	2.49314	4.1324	3.93112	1.0512	0.293165	NA	0	0.852459	0	0	0	14.1064
AT1G02250	8.80126	-1.86976	2.16507	-0.863599	0.387808	0.652223	39.095	0	2.39624	3.45662	7.8597	0
AT1G02260	178.665	0.306397	0.402174	0.761853	0.446148	0.699708	187.33	137.246	154.557	155.548	220.072	217.238
AT1G02270	1598.46	1.17045	0.321711	3.63821	0.000274541	0.00321839	621.448	1183.21	1145.4	2648.93	1417.37	2574.41
AT1G02280	945.117	-1.48216	0.308305	-4.80745	1.53e-06	3.98e-05	1589.86	1386.1	1200.51	511.58	668.074	314.572
AT1G02290	49.1606	0.0507112	0.798204	0.0635316	0.949343	0.979231	55.3846	65.6394	23.9624	54.1538	19.6492	76.1744
AT1G02300	940.736	0.154887	0.281473	0.550274	0.582131	0.79972	947.239	762.951	960.292	784.654	1321.74	867.542
AT1G02305	884.797	-0.412316	0.276591	-1.49071	0.136038	0.350868	961.085	918.951	1151.39	882.591	848.847	545.917
AT1G02310	18.9261	-1.31991	1.40574	-0.938939	0.347762	0.616501	51.3122	21.3115	8.38683	0	17.0293	15.517
AT1G02320	1.61032	2.75837	3.92934	0.701992	0.482684	NA	0	0	1.19812	0	0	8.46382
AT1G02330	308.833	0.313912	0.35596	0.881876	0.377844	0.643656	316.832	228.459	280.959	436.687	251.51	338.553
AT1G02335	26.6148	-6.84019	1.7512	-3.906	9.38e-05	0.00132265	136.832	8.52459	13.1793	1.15221	0	0
AT1G02340	649.895	-0.143754	0.294417	-0.488266	0.625361	0.827055	645.882	687.935	713.479	830.742	531.839	489.491
AT1G02350	224.601	0.816722	0.461512	1.76967	0.0767829	0.24183	223.167	132.984	131.793	149.787	381.195	328.678
AT1G02360	62.6577	0.837782	0.830273	1.00904	0.312954	0.579536	6.51583	60.5246	67.6937	81.8068	55.0179	104.387
AT1G02370	39.8225	-0.259159	0.808347	-0.320604	0.74851	0.89416	59.457	30.6885	40.137	56.4582	18.3393	33.8553
AT1G02380	227.388	0.46582	0.427617	1.08934	0.276004	0.539701	145.792	250.623	176.722	230.442	375.956	184.793
AT1G02390	2422.71	0.832251	0.741485	1.12241	0.261688	0.52296	592.126	2510.49	2125.46	5187.24	1608.62	2512.34
AT1G02391	1.8358	-1.10845	3.85387	-0.287619	0.773639	NA	2.44344	5.11476	0	3.45662	0	0
AT1G02400	2942.53	1.0699	0.413181	2.58942	0.00961389	0.055558	1058.01	2987.87	1651.01	5335.88	1640.06	4982.37
AT1G02405	20.3203	1.52162	1.08546	1.40182	0.160968	0.389274	4.88687	17.0492	9.58494	32.2618	14.4094	43.7297
AT1G02410	639.823	-0.392658	0.2487	-1.57885	0.114371	0.314104	685.791	787.673	705.692	535.777	590.787	533.221
AT1G02420	6.54895	-0.349884	1.65698	-0.211158	0.832764	0.930131	6.51583	7.67214	7.78777	2.30442	6.54975	8.46382
AT1G02430	34.0654	0.465853	0.843221	0.552469	0.580627	0.799106	30.1357	38.3607	17.3727	21.892	45.8482	50.7829
AT1G02440	16.7952	0.148801	1.54474	0.0963272	0.923261	0.968581	0	25.5738	22.1652	3.45662	34.0587	15.517
AT1G02450	2.76265	0.737008	3.44086	0.214193	0.830397	NA	0.814479	0	5.39153	10.3699	0	0
AT1G02460	0	NA	NA	NA	NA	NA	0	0	0	0	0	0
AT1G02470	64.3064	-0.633142	0.775738	-0.81618	0.414397	0.673747	122.172	23.0164	89.2598	27.653	78.597	45.1404
AT1G02475	1278.6	-1.05926	0.222874	-4.75275	2.01e-06	5.07e-05	1884.7	1642.69	1657	868.765	893.386	725.067
AT1G02480	0	NA	NA	NA	NA	NA	0	0	0	0	0	0
AT1G02490	0	NA	NA	NA	NA	NA	0	0	0	0	0	0
AT1G02500	7493.35	-1.51509	0.232877	-6.50596	7.72e-11	6.53e-09	13670.2	10136.6	9500.48	3743.52	4718.44	3190.86
AT1G02510	8.04952	1.26325	2.57072	0.491398	0.623145	0.825935	0	13.6394	0.599059	0	34.0587	0
AT1G02520	0	NA	NA	NA	NA	NA	0	0	0	0	0	0
AT1G02530	0	NA	NA	NA	NA	NA	0	0	0	0	0	0
AT1G02540	0	NA	NA	NA	NA	NA	0	0	0	0	0	0
AT1G02550	0	NA	NA	NA	NA	NA	0	0	0	0	0	0
AT1G02560	2091.22	-1.06106	0.233369	-4.54672	5.45e-06	0.000118881	3130.86	2923.94	2426.79	1072.71	1490.72	1502.33
AT1G02570	3.66101	5.73444	3.37337	1.69992	0.0891467	NA	0	0	0	0	7.8597	14.1064
AT1G02575	0	NA	NA	NA	NA	NA	0	0	0	0	0	0
AT1G02580	2.34016	-4.30902	3.92103	-1.09895	0.271789	NA	3.25792	0	10.7831	0	0	0
AT1G02590	6.46908	0.819364	1.72677	0.474506	0.635139	0.83326	5.70135	1.70492	6.58965	3.45662	15.7194	5.64255
AT1G02600	1.09162	3.98973	3.95894	1.00778	0.313561	NA	0	0	0	0	6.54975	0
AT1G02610	2110.04	0.981415	0.237869	4.12587	3.69e-05	0.000611001	1535.29	1588.13	1133.42	2294.05	2993.23	3116.1
AT1G02620	82.3332	0.255423	0.653593	0.390798	0.695946	0.865012	81.4479	100.59	43.1322	44.9361	78.597	145.296
AT1G02630	0	NA	NA	NA	NA	NA	0	0	0	0	0	0
AT1G02640	309.394	-0.768699	0.474365	-1.62048	0.105129	0.297614	186.516	589.05	394.181	252.334	130.995	303.287
AT1G02650	61.4118	-0.52826	0.803414	-0.65752	0.510847	0.749222	140.09	46.0328	31.7501	78.3501	51.088	21.1596
AT1G02660	3286.06	0.54758	0.225436	2.42898	0.0151414	0.0779633	2085.07	3088.46	2835.95	3894.46	4326.76	3485.68
AT1G02670	55.9797	1.51288	0.797707	1.89653	0.0578896	0.200255	60.2714	10.2295	16.7737	93.3289	72.0472	83.2276
AT1G02680	575.122	0.753785	0.320594	2.35121	0.0187125	0.0911751	459.366	347.803	477.45	959.789	510.88	695.444
AT1G02681	6.46171	-0.189385	2.2757	-0.0832204	0.933676	0.972984	17.1041	0	3.59435	11.5221	6.54975	0
AT1G02690	27.5056	-3.25111	1.38416	-2.3488	0.0188342	0.0915911	31.7647	75.0164	42.5332	0	15.7194	0
AT1G02700	2.73304	-2.40249	3.875	-0.619996	0.535261	NA	0	0	13.7784	0	2.6199	0
AT1G02710	4.86465	1.86635	2.11904	0.880753	0.378451	0.644238	3.25792	0	2.9953	6.91325	11.7895	4.23191
AT1G02720	134.118	-0.146924	0.441073	-0.333107	0.739054	0.888418	152.308	128.721	141.977	156.7	119.205	105.798
AT1G02730	4.15497	-4.09295	3.44753	-1.18721	0.235144	0.489906	23.6199	0	0	0	1.30995	0
AT1G02740	97.2375	1.65506	0.558851	2.96154	0.00306106	0.022845	48.8687	57.1148	34.7454	115.221	107.416	220.059
AT1G02750	180.951	0.63064	0.486452	1.29641	0.194835	0.436913	81.4479	113.377	230.638	194.723	201.732	263.789
AT1G02760	0	NA	NA	NA	NA	NA	0	0	0	0	0	0
AT1G02770	2.7433	-1.35152	3.09437	-0.436767	0.66228	NA	0.814479	0.852459	10.184	4.60883	0	0
AT1G02780	3824.42	-1.00051	0.226579	-4.41571	1.01e-05	0.000201127	5483.89	5395.22	4419.86	2223.76	2240.01	3183.81
AT1G02790	3.44341	4.63246	3.23085	1.43382	0.151624	NA	0.814479	0	0	18.4353	0	1.41064
AT1G02800	0	NA	NA	NA	NA	NA	0	0	0	0	0	0
AT1G02810	0.42623	-1.83357	3.98534	-0.460079	0.64546	NA	0	2.55738	0	0	0	0
AT1G02813	0.218325	1.74702	4.08047	0.428142	0.668548	NA	0	0	0	0	1.30995	0
AT1G02816	498.778	-0.0909626	0.377973	-0.240659	0.80982	0.9215	302.986	560.066	680.531	660.215	417.874	370.998
AT1G02820	210.027	0.567935	0.413124	1.37473	0.169214	0.401266	229.683	153.443	124.604	205.093	238.411	308.93
AT1G02830	0	NA	NA	NA	NA	NA	0	0	0	0	0	0
AT1G02840	1491.59	0.634961	0.233435	2.72007	0.00652674	0.0412984	1379.73	982.033	1143.6	1599.26	1915.15	1929.75
AT1G02850	671.213	-2.17451	0.436823	-4.97801	6.42e-07	1.84e-05	1302.35	1258.23	735.644	154.396	132.305	444.351
AT1G02860	801.138	0.421283	0.31171	1.35152	0.176528	0.411675	605.972	704.132	745.229	1313.52	653.665	784.314
AT1G02870	71.6554	-0.387447	1.04748	-0.369885	0.711468	0.873037	78.19	99.7378	65.8965	132.504	0	53.6042
AT1G02880	1412	1.27923	0.263748	4.85019	1.23e-06	3.29e-05	604.343	1027.21	840.48	1757.12	2298.96	1943.86
AT1G02890	266.295	1.67953	0.42711	3.93231	8.41e-05	0.00120356	125.43	169.639	85.6654	570.343	267.23	379.461
AT1G02900	165.011	0.487801	0.722039	0.675589	0.499302	0.740856	35.8371	275.344	101.241	341.054	60.2577	176.33
AT1G02910	1080.03	-0.0832538	0.240902	-0.345591	0.72965	0.882755	1084.89	1088.59	1159.78	1068.1	850.157	1228.66
AT1G02920	716.82	-0.862211	0.273179	-3.15621	0.00159833	0.013603	787.601	918.099	1068.72	557.669	407.394	561.434
AT1G02930	1531.69	-0.384599	0.295424	-1.30186	0.192966	0.435321	1260.81	2074.03	1869.66	1813.58	1013.9	1158.13
AT1G02940	6.12971	6.47851	2.82228	2.29549	0.0217053	0.101326	0	0	0	0	17.0293	19.7489
AT1G02950	0	NA	NA	NA	NA	NA	0	0	0	0	0	0
AT1G02952	0	NA	NA	NA	NA	NA	0	0	0	0	0	0
AT1G02960	535.193	0.54402	0.292923	1.85721	0.0632809	0.212236	429.23	423.672	453.488	602.605	805.619	496.544
AT1G02965	0	NA	NA	NA	NA	NA	0	0	0	0	0	0
AT1G02970	8.65596	-1.86205	2.01322	-0.924908	0.355014	0.623427	17.1041	18.7541	4.79247	0	0	11.2851
AT1G02980	1.72831	4.65938	3.93965	1.18269	0.236932	NA	0	0	0	10.3699	0	0
AT1G02990	112.823	0.342281	0.541583	0.632001	0.527386	0.762094	79.0045	90.3607	128.798	69.1325	174.223	135.421
AT1G03000	350.425	0.0577715	0.342372	0.168739	0.866002	0.944627	448.778	332.459	249.209	320.314	368.096	383.693
AT1G03010	1.30995	4.25296	3.95028	1.07662	0.28165	NA	0	0	0	0	7.8597	0
AT1G03020	21.1287	3.88972	1.3768	2.8252	0.00472516	0.0322182	2.44344	0	5.39153	19.5875	10.4796	88.8701
AT1G03022	0	NA	NA	NA	NA	NA	0	0	0	0	0	0
AT1G03030	441.632	0.488417	0.339835	1.43722	0.150656	0.373357	273.665	372.525	455.884	413.643	459.792	674.285
AT1G03040	546.966	0.0835941	0.328695	0.254321	0.799248	0.917437	661.357	430.492	502.011	767.371	448.003	472.563
AT1G03050	14.5555	-1.21575	2.19365	-0.554212	0.579434	0.798661	61.0859	0	0	9.21766	17.0293	0
AT1G03055	180.212	0.683117	0.479822	1.42369	0.154536	0.379376	155.565	150.885	108.43	115.221	225.311	325.857
AT1G03060	183.019	0.168663	0.438719	0.384444	0.700649	0.867697	201.176	199.476	116.817	221.224	224.001	135.421
AT1G03070	19.5548	0.783319	1.42878	0.548242	0.583526	0.800597	15.4751	4.2623	23.3633	41.4795	32.7487	0
AT1G03080	671.363	1.76912	0.357328	4.95098	7.38e-07	2.08e-05	342.081	298.361	273.77	1645.35	713.922	754.691
AT1G03090	1703.5	0.27066	0.411999	0.656943	0.511218	0.749542	1561.36	1872	1199.92	3279.18	724.402	1584.15
AT1G03100	49.8753	-0.332752	0.895642	-0.371524	0.710247	0.872443	117.285	23.8689	25.7595	38.0229	75.9771	18.3383
AT1G03103	3.48121	0.740214	3.58359	0.206557	0.836356	NA	0	0	7.78777	0	13.0995	0
AT1G03106	14.5831	3.60742	1.67187	2.15771	0.03095	0.129892	1.62896	5.11476	0	1.15221	47.1582	32.4447
AT1G03110	122.596	-1.12439	0.646087	-1.7403	0.0818059	0.251158	128.688	174.754	201.284	159.005	37.9885	33.8553
AT1G03120	144.294	0.187373	0.550841	0.340157	0.733738	0.884935	166.154	173.902	65.2974	225.833	141.475	93.102
AT1G03130	21832.1	-0.925341	0.190176	-4.86571	1.14e-06	3.06e-05	29278.1	27137.2	29394	14130.7	17630.6	13422.2
AT1G03140	452.568	-0.156435	0.316608	-0.494098	0.621237	0.824588	618.19	444.131	369.02	372.163	450.623	461.278
AT1G03150	627.686	0.575444	0.279351	2.05993	0.0394049	0.153799	429.23	455.213	627.215	707.456	703.443	843.561
AT1G03160	809.901	0.200735	0.321024	0.625295	0.531778	0.765638	1035.2	708.394	518.186	1077.31	830.508	689.802
AT1G03170	17.8387	2.11617	1.12999	1.87273	0.0611059	0.20741	8.95927	5.11476	5.99059	16.1309	51.088	19.7489
AT1G03180	68.5823	-0.52115	0.783524	-0.665137	0.505963	0.745372	136.018	25.5738	80.873	35.7185	100.866	32.4447
AT1G03190	90.6693	-0.171117	0.610209	-0.280423	0.779153	0.908806	133.575	100.59	53.9153	53.0016	75.9771	126.957
AT1G03200	0.43665	2.66613	4.03602	0.660585	0.508878	NA	0	0	0	0	2.6199	0
AT1G03210	261.043	0.365705	0.41551	0.880135	0.378786	0.644372	162.081	275.344	246.812	205.093	424.424	252.504
AT1G03220	10008.7	0.619603	0.310847	1.99327	0.0462317	0.17172	5109.23	9831.42	8734.88	13801.1	7161.49	15414
AT1G03230	425.105	0.39772	0.425198	0.935374	0.349596	0.618282	201.176	502.099	397.176	466.644	289.499	694.033
AT1G03240	3.78011	5.78541	3.33021	1.73725	0.082343	NA	0	0	0	16.1309	6.54975	0
AT1G03250	439.088	-0.113353	0.289043	-0.392168	0.694934	0.864478	478.099	436.459	454.087	344.51	455.862	465.51
AT1G03260	180.004	-0.117413	0.463423	-0.253359	0.799991	0.917662	168.597	161.115	231.836	96.7855	239.721	181.972
AT1G03270	54.2166	0.0158284	0.731183	0.0216477	0.982729	0.993537	89.5927	39.2131	32.9482	42.6317	41.9184	78.9957
AT1G03280	333.501	0.168064	0.396835	0.423511	0.671922	0.851697	428.416	211.41	302.525	329.532	479.442	249.683
AT1G03290	329.762	0.820158	0.394452	2.07924	0.0375956	0.148844	275.294	207.148	233.034	523.102	227.931	512.061
AT1G03300	31.6882	-1.48805	0.921521	-1.61477	0.10636	0.299582	34.2081	62.2295	43.7313	20.7397	5.2398	23.9808
AT1G03310	181.571	-1.01094	0.454439	-2.22459	0.026109	0.115246	333.122	175.607	219.256	87.5678	162.434	111.44
AT1G03320	5.04698	-2.25692	2.76577	-0.81602	0.414489	0.673826	11.4027	13.6394	0	0	5.2398	0
AT1G03330	302.102	-0.143144	0.3839	-0.372869	0.709246	0.8721	400.724	207.148	343.261	324.923	213.522	323.036
AT1G03340	44.5903	0.21239	0.756121	0.280894	0.778791	0.908673	27.6923	40.9181	55.1134	29.9574	41.9184	71.9425
AT1G03350	527.768	0.0572085	0.294659	0.194151	0.846057	0.935715	474.841	582.23	495.422	672.89	509.57	431.655
AT1G03360	65.9983	-1.38739	0.802907	-1.72796	0.0839962	0.256085	136.832	23.0164	126.401	16.1309	48.4681	45.1404
AT1G03365	262.59	0.442005	0.364564	1.21242	0.225352	0.47726	285.882	220.787	161.746	316.857	285.569	304.698
AT1G03370	994.737	1.25178	0.301919	4.14608	3.38e-05	0.000565893	389.321	728	647.583	1447.17	1101.67	1654.68
AT1G03380	471.997	0.139426	0.313784	0.444337	0.656799	0.843947	573.393	403.213	371.417	509.276	569.828	404.853
AT1G03390	3.01746	0.728206	3.7766	0.19282	0.8471	NA	0	6.81968	0	0	0	11.2851
AT1G03400	890.473	0.199178	0.316704	0.628909	0.529408	0.763593	843.8	810.689	832.692	702.847	1429.15	723.657
AT1G03410	418.928	1.30104	0.37695	3.45148	0.000557526	0.00575776	364.887	190.951	170.133	510.428	745.361	531.81
AT1G03420.1	0	NA	NA	NA	NA	NA	0	0	0	0	0	0
AT1G03430	598.452	1.06016	0.345414	3.06924	0.00214607	0.0171549	301.357	361.443	500.214	525.407	816.099	1086.19
AT1G03440	161.1	-0.622739	0.433787	-1.43559	0.15112	0.374184	221.538	156.853	207.274	96.7855	120.515	163.634
AT1G03445	4.56946	-0.968683	2.59737	-0.372947	0.709188	0.8721	13.0317	5.11476	0	0	7.8597	1.41064
AT1G03457	106.228	0.466746	0.520105	0.897406	0.369502	0.636893	74.9321	72.4591	119.812	86.4156	144.094	139.653
AT1G03470	56.4385	1.62121	0.763773	2.12264	0.0337842	0.138354	26.0633	23.8689	32.9482	32.2618	65.4975	157.991
AT1G03475	1085.97	-0.178526	0.233146	-0.765726	0.44384	0.698135	1276.29	1080.92	1101.67	882.591	1038.79	1135.56
AT1G03490	0.199686	-0.811322	4.06308	-0.199682	0.84173	NA	0	0	1.19812	0	0	0
AT1G03495	44.4815	0.105701	0.776711	0.136088	0.891752	0.956015	36.6516	38.3607	53.3163	24.1964	35.3686	78.9957
AT1G03502	1.97947	4.84814	3.73083	1.29948	0.193779	NA	0	0	0	2.30442	3.92985	5.64255
AT1G03506	6.38324	1.21453	1.97522	0.614884	0.538631	0.769506	7.33031	4.2623	0	8.06546	14.4094	4.23191
AT1G03510	3.34047	-0.175378	2.84259	-0.0616968	0.950804	NA	0	7.67214	2.9953	8.06546	1.30995	0
AT1G03515	0	NA	NA	NA	NA	NA	0	0	0	0	0	0
AT1G03520	482.029	0.0865582	0.334342	0.258891	0.795719	0.91537	307.873	495.279	599.059	479.319	432.283	578.361
AT1G03530	47.6711	0.740664	0.82733	0.895246	0.370655	0.637654	21.9909	46.0328	38.9388	16.1309	82.5268	80.4063
AT1G03540	5.54319	5.33501	3.12293	1.70833	0.0875743	0.263246	0.814479	0	0	0	0	32.4447
AT1G03545	0.199686	-0.811322	4.06308	-0.199682	0.84173	NA	0	0	1.19812	0	0	0
AT1G03550	148.272	1.60835	0.446285	3.60387	0.000313518	0.00359162	93.6651	61.3771	64.6984	199.332	191.253	279.306
AT1G03560	124.437	-0.777102	0.586828	-1.32424	0.185423	0.424885	127.873	222.492	121.609	147.483	89.0766	38.0872
AT1G03570	0	NA	NA	NA	NA	NA	0	0	0	0	0	0
AT1G03580	69.6981	-1.05462	0.584263	-1.80504	0.0710687	0.229316	105.882	102.295	74.2833	53.0016	43.2283	39.4978
AT1G03590	329.15	-0.462915	0.398558	-1.16148	0.245448	0.503079	442.262	368.262	333.676	148.635	375.956	306.108
AT1G03600	4247.03	-1.19036	0.23809	-4.99962	5.74e-07	1.68e-05	6766.69	5087.48	5864.19	2964.63	1905.98	2893.22
AT1G03610	4355.96	0.44558	0.211692	2.10485	0.0353045	0.142521	3744.16	3952.85	3368.51	4090.34	5145.48	5834.39
AT1G03620	84.1764	2.60553	0.75411	3.45511	0.00055007	0.00569538	43.1674	23.0164	5.39153	87.5678	124.445	221.47
AT1G03630	3545.17	-1.09715	0.249383	-4.39945	1.09e-05	0.000213526	5361.72	4466.04	4667.27	1753.66	3040.39	1981.95
AT1G03640	1.75089	3.59755	3.942	0.912622	0.361441	NA	0.814479	0	0	5.76104	3.92985	0
AT1G03650	8.47352	-1.41074	2.37567	-0.593827	0.552628	0.780499	24.4344	0	12.5802	13.8265	0	0
AT1G03660	0	NA	NA	NA	NA	NA	0	0	0	0	0	0
AT1G03670	1.15221	4.07704	3.95589	1.03062	0.302717	NA	0	0	0	6.91325	0	0
AT1G03680	6576.49	-1.43613	0.183248	-7.83711	4.61e-15	1.24e-12	10566.2	8707.02	9538.22	3510.78	3648.21	3488.51
AT1G03687	136.818	-1.0588	0.605737	-1.74796	0.0804714	0.248997	190.588	208.853	155.755	159.005	79.9069	26.8021
AT1G03700	0	NA	NA	NA	NA	NA	0	0	0	0	0	0
AT1G03710	4.72744	-0.543083	2.84201	-0.191091	0.848454	0.936996	0	4.2623	12.5802	11.5221	0	0
AT1G03720	0	NA	NA	NA	NA	NA	0	0	0	0	0	0
AT1G03730	1141.59	1.09238	0.275538	3.96453	7.35e-05	0.00108046	677.647	872.919	636.8	1564.7	1949.2	1148.26
AT1G03740	1033.59	0.691905	0.297148	2.32849	0.0198861	0.0951434	521.267	1047.67	802.14	1088.84	1402.96	1338.69
AT1G03743	9.89102	2.211	1.52929	1.44576	0.148243	0.370385	4.0724	5.96722	0.599059	19.5875	6.54975	22.5702
AT1G03746	11.6978	0.231133	1.4475	0.159677	0.873136	0.947686	16.2896	9.37705	6.58965	1.15221	17.0293	19.7489
AT1G03750	52.3351	-0.0448025	0.801307	-0.0559117	0.955412	0.98125	35.0226	66.4918	58.1087	85.2634	55.0179	14.1064
AT1G03760	11.4774	-0.139351	2.07578	-0.067132	0.946477	0.977961	24.4344	11.082	0.599059	0	32.7487	0
AT1G03770	13.5737	0.310498	1.64262	0.189026	0.850072	0.937361	1.62896	16.1967	18.5708	34.5662	10.4796	0
AT1G03780	4.34819	-2.19806	2.904	-0.756909	0.449105	0.702321	14.6606	6.81968	0	4.60883	0	0
AT1G03790	0	NA	NA	NA	NA	NA	0	0	0	0	0	0
AT1G03800	24.8938	1.33456	1.3616	0.980137	0.327018	0.593956	0	23.8689	18.5708	77.1979	17.0293	12.6957
AT1G03810	1.09162	3.98973	3.95894	1.00778	0.313561	NA	0	0	0	0	6.54975	0
AT1G03820	0.568306	-2.25225	3.96572	-0.56793	0.570082	NA	0	3.40984	0	0	0	0
AT1G03830	14.127	1.2238	1.64382	0.744483	0.456584	0.708077	0	21.3115	4.19341	42.6317	3.92985	12.6957
AT1G03840	0	NA	NA	NA	NA	NA	0	0	0	0	0	0
AT1G03850	384.958	-0.843434	0.448134	-1.8821	0.0598221	0.204362	394.208	529.377	560.12	479.319	132.305	214.417
AT1G03860	568.873	-1.11488	0.311418	-3.58002	0.000343572	0.00388507	952.126	723.738	658.965	335.293	279.019	464.1
AT1G03870	1434.58	-0.844794	0.33056	-2.55565	0.010599	0.059775	1252.67	1777.38	2498.68	1228.25	627.466	1223.02
AT1G03880	0	NA	NA	NA	NA	NA	0	0	0	0	0	0
AT1G03890	0	NA	NA	NA	NA	NA	0	0	0	0	0	0
AT1G03900	447.572	-0.114575	0.299596	-0.382431	0.702142	0.867827	482.172	431.344	482.842	519.646	432.283	337.142
AT1G03905	146.364	0.121707	0.432588	0.281347	0.778444	0.908478	140.905	105.705	173.727	153.244	148.024	156.581
AT1G03910	454.937	0.203244	0.491199	0.413771	0.679042	0.855679	497.647	411.738	360.034	833.046	484.681	142.474
AT1G03920	12.8841	-2.67377	2.31212	-1.15642	NA	NA	65.9728	0.852459	0	0	10.4796	0
AT1G03930	661.753	0.17845	0.254159	0.702121	0.482604	0.729577	544.072	660.656	657.767	669.433	774.18	664.41
AT1G03935	9.61228	-1.78286	1.49348	-1.19376	0.232572	0.486764	13.0317	23.8689	7.78777	2.30442	7.8597	2.82127
AT1G03940	16.3647	0.890071	1.10839	0.80303	0.421957	0.680378	14.6606	10.2295	9.58494	29.9574	19.6492	14.1064
AT1G03950	190.927	0.209855	0.435238	0.482161	0.629691	0.829711	135.204	138.098	257.595	228.137	220.072	166.455
AT1G03960	168.459	0.405177	0.500002	0.810352	0.417738	0.677063	81.4479	136.394	216.859	240.811	208.282	126.957
AT1G03970	17.0927	0.506489	1.28839	0.393117	0.694233	0.86411	3.25792	23.0164	16.1746	43.7839	7.8597	8.46382
AT1G03980	26.9932	-0.905524	1.09709	-0.82539	0.40915	0.669534	75.7466	5.96722	23.9624	25.3486	19.6492	11.2851
AT1G03982	8.19978	4.2047	1.9799	2.12369	0.0336959	0.138048	0	0	2.39624	9.21766	24.889	12.6957
AT1G03990	30.8722	1.78605	0.964666	1.85147	0.0641013	0.214075	21.9909	7.67214	11.9812	26.5008	91.6965	25.3915
AT1G04000	254.654	-0.157916	0.429594	-0.367593	0.713176	0.873889	346.968	318.82	140.18	195.875	258.06	268.021
AT1G04010	96.3512	1.68806	0.642362	2.6279	0.00859137	0.050846	38.2805	68.1968	30.552	80.6546	100.866	259.557
AT1G04020	39.1061	-1.02231	1.24727	-0.819636	0.412423	0.672058	35.8371	98.8853	22.7642	67.9803	9.16965	0
AT1G04030	22.6623	-0.337796	0.956215	-0.353263	0.723891	0.879148	17.1041	26.4262	32.3492	19.5875	23.5791	16.9276
AT1G04040	467.258	-0.544115	0.416024	-1.30789	0.19091	0.432534	280.995	628.263	753.616	347.967	533.149	259.557
AT1G04050	96.817	1.33134	0.689602	1.9306	0.053533	0.189569	21.1765	60.5246	83.2692	92.1766	247.58	76.1744
AT1G04070	87.5781	0.0881715	0.521876	0.168951	0.865835	0.944627	89.5927	84.3935	80.873	112.916	77.287	80.4063
AT1G04080	1635.98	0.485387	0.291835	1.66322	0.0962675	0.281107	1361.81	1294.03	1434.75	2810.24	1532.64	1382.42
AT1G04090	9.52276	0.0518992	1.67186	0.0310429	0.975235	0.989641	8.14479	8.52459	11.3821	14.9787	0	14.1064
AT1G04100	109.339	-0.42337	0.548093	-0.772442	0.439853	0.695253	185.701	99.7378	90.4579	77.1979	130.995	71.9425
AT1G04110	1.18615	2.25534	3.94622	0.571519	0.567648	NA	0	0	1.19812	4.60883	1.30995	0
AT1G04120	134.584	0.302692	0.542131	0.558337	0.576614	0.796316	153.122	75.0164	133.59	238.507	111.346	95.9233
AT1G04130	162.622	0.0878225	0.435354	0.201727	0.840131	0.933334	110.769	205.443	156.953	192.419	149.334	160.813
AT1G04140	767.295	-0.00853362	0.269612	-0.0316515	0.97475	0.989298	900.814	821.771	586.479	735.109	723.092	836.508
AT1G04150	0	NA	NA	NA	NA	NA	0	0	0	0	0	0
AT1G04160	90.1317	0.0412897	0.585672	0.0704997	0.943796	0.976815	96.1085	108.262	62.3021	107.155	48.4681	118.494
AT1G04170	314.839	-0.383366	0.412599	-0.929148	0.352812	0.621567	369.773	315.41	384.596	441.296	184.703	193.257
AT1G04171	1.14011	2.17064	3.94967	0.549575	0.582611	NA	0	0	1.19812	0	0	5.64255
AT1G04180	0	NA	NA	NA	NA	NA	0	0	0	0	0	0
AT1G04190	250.712	-0.146662	0.398832	-0.367729	0.713075	0.873889	264.706	180.721	344.459	190.114	299.978	224.291
AT1G04200	491.181	1.34318	0.298634	4.49773	6.87e-06	0.000143855	218.28	340.131	274.968	776.588	626.156	710.961
AT1G04210	379.968	-0.0785253	0.340818	-0.230403	0.817779	0.924846	294.841	376.787	499.016	420.556	290.809	397.8
AT1G04220	107.186	-0.0365183	0.542291	-0.0673408	0.94631	0.977961	139.276	75.0164	111.425	116.373	137.545	63.4787
AT1G04230	181.478	0.628077	0.396959	1.58222	0.113599	0.312624	136.832	169.639	121.609	259.247	189.943	211.596
AT1G04240	1112.21	0.575014	0.343324	1.67484	0.0939654	0.276107	509.049	826.886	1343.69	1497.87	1041.41	1454.37
AT1G04250	1956.39	0.670726	0.282744	2.3722	0.0176825	0.0874048	1685.97	1005.9	1836.12	1858.51	2846.52	2505.29
AT1G04260	205.693	-0.0915576	0.410571	-0.223001	0.823535	0.926972	139.276	236.131	261.19	231.594	175.533	190.436
AT1G04270	871.932	-0.890195	0.299167	-2.97558	0.00292437	0.0219961	1299.09	1103.94	994.438	433.23	567.208	833.687
AT1G04280	1241.06	0.528608	0.244567	2.1614	0.0306642	0.128988	1251.04	841.378	956.098	1340.02	1492.03	1565.81
AT1G04290	34.7387	1.53272	0.832542	1.84102	0.065619	0.217627	21.9909	11.082	20.368	32.2618	73.3572	49.3723
AT1G04295	0	NA	NA	NA	NA	NA	0	0	0	0	0	0
AT1G04300	767.067	0.899003	0.294758	3.04997	0.00228862	0.0181146	728.959	481.64	396.577	1077.31	943.164	974.75
AT1G04310	19.0298	1.30732	1.27198	1.02778	0.304052	0.569935	8.95927	11.9344	11.9812	28.8052	51.088	1.41064
AT1G04320	0	NA	NA	NA	NA	NA	0	0	0	0	0	0
AT1G04330	1.41064	4.35493	3.94733	1.10326	0.269915	NA	0	0	0	0	0	8.46382
AT1G04340	250.377	0.426105	0.348179	1.22381	0.221023	0.471566	231.312	218.23	191.699	326.075	234.481	300.466
AT1G04350	1359.55	-0.776135	0.291941	-2.65853	0.00784814	0.0473381	2449.14	1170.43	1530.6	1013.94	1028.31	964.876
AT1G04360	150.681	0.342427	0.542576	0.631114	0.527966	0.76255	74.1176	188.394	135.986	86.4156	235.791	183.383
AT1G04370	0	NA	NA	NA	NA	NA	0	0	0	0	0	0
AT1G04380	3.00604	5.44962	3.64574	1.49479	0.13497	NA	0	0	0	0	3.92985	14.1064
AT1G04390	79.1762	-0.353714	0.630375	-0.561116	0.574719	0.794829	62.7149	137.246	66.4955	40.3273	86.4567	81.817
AT1G04400	1062.59	0.0296181	0.259402	0.114179	0.909096	0.962818	1081.63	988.853	1084.9	1343.47	818.718	1057.98
AT1G04410	5461.52	-0.788513	0.216592	-3.64054	0.000272066	0.00319122	7106.33	7066.04	6581.26	3312.6	5001.39	3701.51
AT1G04420	1809.64	-1.29511	0.260683	-4.96815	6.76e-07	1.92e-05	3051.04	2241.12	2422	876.83	1376.76	890.112
AT1G04425	0	NA	NA	NA	NA	NA	0	0	0	0	0	0
AT1G04430	1604.65	0.0888248	0.264653	0.335627	0.737152	0.886927	1188.32	1786.76	1691.14	2077.43	1530.02	1354.21
AT1G04440	1859.12	0.753053	0.275758	2.73085	0.00631709	0.040263	1101.18	1604.33	1448.52	2841.35	1586.35	2573
AT1G04445	32.1535	-1.11264	0.960959	-1.15784	0.246929	0.504894	17.1041	78.4263	36.5426	28.8052	23.5791	8.46382
AT1G04450	0.897057	-1.55231	3.95601	-0.392393	0.694768	NA	4.0724	0	0	0	1.30995	0
AT1G04457	0	NA	NA	NA	NA	NA	0	0	0	0	0	0
AT1G04470	0	NA	NA	NA	NA	NA	0	0	0	0	0	0
AT1G04480	608.306	-0.615734	0.325194	-1.89343	0.0583001	0.201039	820.995	821.771	566.111	555.364	315.698	569.897
AT1G04490	9.15064	-2.06008	1.78961	-1.15113	0.249677	0.508293	17.1041	2.55738	24.5614	0	7.8597	2.82127
AT1G04500	0	NA	NA	NA	NA	NA	0	0	0	0	0	0
AT1G04501	0	NA	NA	NA	NA	NA	0	0	0	0	0	0
AT1G04510	220.012	-0.819741	0.590924	-1.38722	0.165375	0.395842	258.19	266.82	318.1	274.226	170.293	32.4447
AT1G04520	53.9541	-0.940385	0.778396	-1.20811	0.227006	0.479103	70.0452	43.4754	99.4438	66.8281	15.7194	28.2127
AT1G04530	1487.81	-0.908992	0.224625	-4.0467	5.19e-05	0.00080986	2155.11	1628.2	2040.99	952.876	1047.96	1101.71
AT1G04540	5.23377	-1.51677	2.73668	-0.554239	0.579415	0.798661	11.4027	11.9344	0	8.06546	0	0
AT1G04550	151.037	-0.995187	0.545569	-1.82413	0.0681331	0.223062	223.982	115.934	263.586	101.394	151.954	49.3723
AT1G04555	148.096	0.220663	0.489736	0.450575	0.652296	0.842115	92.8506	161.967	155.755	232.746	130.995	114.262
AT1G04560	0	NA	NA	NA	NA	NA	0	0	0	0	0	0
AT1G04570	6.42837	6.54881	2.36407	2.77014	0.00560321	0.0367845	0	0	0	12.6743	11.7895	14.1064
AT1G04580	2.05609	3.84907	3.93638	0.97782	0.328163	NA	0.814479	0	0	11.5221	0	0
AT1G04590	165.187	-1.24399	0.503834	-2.46905	0.0135473	0.0720422	256.561	266.82	173.128	47.2405	103.486	143.885
AT1G04600	1.62896	-3.78058	3.92732	-0.962635	0.335731	NA	9.77375	0	0	0	0	0
AT1G04610	49.0601	-1.60051	1.16561	-1.37311	0.169718	0.402021	50.4977	145.771	25.1605	12.6743	60.2577	0
AT1G04620	56.6579	-2.26282	1.24785	-1.81337	0.069774	0.226683	230.498	4.2623	46.7266	32.2618	26.199	0
AT1G04625	0	NA	NA	NA	NA	NA	0	0	0	0	0	0
AT1G04630	397.589	-1.24187	0.307405	-4.03984	5.35e-05	0.000828793	511.493	604.394	560.719	253.486	186.013	269.432
AT1G04635	7.32084	-3.89893	2.52741	-1.54266	0.122914	0.328728	32.5792	8.52459	0	0	0	2.82127
AT1G04640	280.936	-0.436681	0.40027	-1.09097	0.275288	0.538746	280.995	237.836	450.492	279.987	269.85	166.455
AT1G04645	10.2568	-0.557624	2.68431	-0.207735	0.835436	0.931306	36.6516	0	0	0	24.889	0
AT1G04650	11.1934	0.276707	1.38576	0.199679	0.841732	0.934058	9.77375	2.55738	17.9718	12.6743	15.7194	8.46382
AT1G04660	30.7334	-2.98196	1.19344	-2.49863	0.0124674	0.0677493	12.2172	86.9509	64.6984	12.6743	7.8597	0
AT1G04670	0	NA	NA	NA	NA	NA	0	0	0	0	0	0
AT1G04680	1258.08	0.409111	0.268019	1.52643	0.126904	0.335256	853.574	1280.39	1108.86	1661.48	1092.5	1551.7
AT1G04684	0	NA	NA	NA	NA	NA	0	0	0	0	0	0
AT1G04690	1044.7	-0.401283	0.242467	-1.655	0.0979243	0.284009	1003.44	1161.9	1401.2	819.22	945.784	936.663
AT1G04700	7.35368	-4.95887	2.51321	-1.97313	0.0484812	0.177391	0	19.6066	23.3633	1.15221	0	0
AT1G04710	216.369	-0.575977	0.36407	-1.58205	0.113638	0.312645	265.52	298.361	213.265	172.831	167.674	180.562
AT1G04720	0	NA	NA	NA	NA	NA	0	0	0	0	0	0
AT1G04730	48.5244	0.964002	0.767139	1.25662	0.208891	0.456199	42.3529	19.6066	36.5426	28.8052	70.7373	93.102
AT1G04750	1073.1	-0.345548	0.213717	-1.61685	0.10591	0.298636	1197.28	1176.39	1229.27	950.572	948.403	936.663
AT1G04760	69.5826	0.736082	0.839426	0.876888	0.380548	0.645661	94.4796	44.3279	17.9718	46.0883	180.773	33.8553
AT1G04770	1777.18	0.870675	0.335556	2.59472	0.00946667	0.0548963	1519	1374.16	877.022	1414.91	3462.2	2015.8
AT1G04778	0.277823	-1.21301	4.02684	-0.30123	0.763239	NA	0.814479	0.852459	0	0	0	0
AT1G04780	567.225	0.309915	0.32932	0.941076	0.346666	0.615643	718.371	409.181	392.384	600.3	741.431	541.685
AT1G04790	214.373	-0.362892	0.415752	-0.872856	0.382742	0.647925	197.918	214.82	310.313	154.396	150.644	258.147
AT1G04800	13.329	0.673964	1.37998	0.488387	0.625276	0.827055	16.2896	2.55738	11.9812	31.1096	3.92985	14.1064
AT1G04810	430.983	-0.309989	0.302495	-1.02477	0.305469	0.571527	512.307	524.263	395.379	448.209	379.885	325.857
AT1G04820	2627.21	-0.487002	0.241617	-2.0156	0.0438423	0.165471	2768.41	3237.64	3193.58	2138.5	2771.85	1653.27
AT1G04830	480.674	0.391582	0.387197	1.01132	0.311861	0.57832	490.316	379.344	378.006	689.02	264.61	682.748
AT1G04840	12.0923	-0.983341	1.41293	-0.695958	0.486455	0.732175	26.8778	13.6394	7.78777	14.9787	7.8597	1.41064
AT1G04850	1169.97	0.213825	0.271023	0.788957	0.430137	0.687018	1175.29	954.755	1120.24	1183.32	1645.3	940.895
AT1G04860	239.017	0.533761	0.369395	1.44496	0.148469	0.370557	228.054	186.689	171.331	315.705	213.522	318.804
AT1G04870	124.489	-0.938374	0.443691	-2.11493	0.0344361	0.140247	183.258	160.262	147.369	87.5678	83.8368	84.6382
AT1G04880	0.235106	1.74702	4.08047	0.428142	0.668548	NA	0	0	0	0	0	1.41064
AT1G04890	0	NA	NA	NA	NA	NA	0	0	0	0	0	0
AT1G04900	27.4551	-1.10636	1.0979	-1.00771	0.313594	0.580362	57.0135	29.8361	25.7595	21.892	28.8189	1.41064
AT1G04910	329.95	0.354917	0.360555	0.984362	0.324938	0.591682	346.968	275.344	246.213	253.486	385.125	472.563
AT1G04920	7.82635	1.15289	2.27481	0.506808	0.61229	0.819481	0	2.55738	11.9812	31.1096	1.30995	0
AT1G04930	30.9961	-0.322978	1.23322	-0.261899	0.793399	0.914793	45.6108	43.4754	14.3774	28.8052	53.7079	0
AT1G04940	132.661	0.230886	0.479661	0.481353	0.630265	0.830031	144.163	108.262	113.821	120.982	204.352	104.387
AT1G04945	21.9668	-0.382509	1.363	-0.280638	0.778988	0.908788	22.8054	41.7705	10.184	42.6317	14.4094	0
AT1G04950	328.316	0.355904	0.360223	0.988009	0.323148	0.589859	213.394	398.099	252.803	339.901	425.734	339.964
AT1G04960	972.627	0.240398	0.233395	1.03	0.303008	0.568772	847.058	971.804	856.654	1004.73	1192.05	963.465
AT1G04970	658.716	0.107742	0.273196	0.394375	0.693304	0.863594	531.04	577.115	793.753	703.999	689.033	657.357
AT1G04980	129.408	-0.459196	0.598024	-0.767856	0.442573	0.697144	87.1493	212.262	149.765	44.9361	107.416	174.919
AT1G04985	683.163	-0.362883	0.296164	-1.22528	0.220471	0.470788	805.52	712.656	788.362	810.002	523.98	458.457
AT1G04990	527.446	0.163136	0.297409	0.548523	0.583333	0.800597	403.982	597.574	491.827	655.606	550.179	465.51
AT1G05000	69.9318	0.0504992	0.708466	0.0712796	0.943175	0.976567	63.5294	65.6394	76.6796	21.892	73.3572	118.494
AT1G05010	1667.14	1.38069	0.272404	5.06854	4.01e-07	1.23e-05	671.131	1141.44	962.688	1878.1	2509.86	2839.61
AT1G05020	71.0859	-0.186327	0.712307	-0.261582	0.793644	0.914813	56.1991	93.7705	77.2786	104.851	74.6671	19.7489
AT1G05030	142.816	1.16399	0.50445	2.30745	0.0210297	0.0990603	103.439	92.0656	68.8918	111.764	187.323	293.413
AT1G05040	6.55504	1.713	2.25908	0.758275	0.448286	0.70164	2.44344	6.81968	0	19.5875	10.4796	0
AT1G05055	130.073	-0.726288	0.568583	-1.27737	0.201473	0.445975	73.3031	242.951	170.133	74.8935	140.165	78.9957
AT1G05060	224.109	-0.689136	0.379156	-1.81755	0.0691327	0.225235	236.199	272.787	321.096	216.615	142.784	155.17
AT1G05061	2.68048	5.28834	3.77457	1.40105	0.1612	NA	0	0	0	6.91325	9.16965	0
AT1G05065	31.5702	1.7345	1.07279	1.61682	0.105918	0.298636	2.44344	13.6394	27.5567	92.1766	18.3393	35.2659
AT1G05070	620.633	-0.62866	0.32516	-1.93339	0.0531888	0.188849	915.474	521.705	823.706	382.533	626.156	454.225
AT1G05080	0	NA	NA	NA	NA	NA	0	0	0	0	0	0
AT1G05085	2.83822	5.36896	3.9269	1.36722	0.171555	NA	0	0	0	0	17.0293	0
AT1G05090	34.9529	-0.162723	0.778382	-0.209053	0.834407	0.930679	39.9095	36.6558	34.1464	25.3486	32.7487	40.9085
AT1G05100	1313.11	2.13314	0.886071	2.40741	0.016066	0.0815575	244.344	454.361	763.8	4327.69	1569.32	519.114
AT1G05120	204.494	1.11437	0.475765	2.34226	0.0191673	0.0926733	125.43	184.984	77.8777	411.338	221.381	205.953
AT1G05135	1093.4	1.61766	0.292716	5.52639	3.27e-08	1.44e-06	340.452	672.591	599.059	1538.2	1570.63	1839.47
AT1G05136	0	NA	NA	NA	NA	NA	0	0	0	0	0	0
AT1G05140	413.357	-0.972891	0.287389	-3.38528	0.000711055	0.0070503	614.932	497.836	530.167	261.551	292.119	283.538
AT1G05150	197.43	-0.137566	0.40391	-0.340585	0.733416	0.884918	210.95	187.541	222.251	235.05	200.422	128.368
AT1G05160	207.592	0.358604	0.506637	0.707813	0.479062	0.726588	242.715	185.836	117.416	153.244	398.225	148.117
AT1G05170	735.752	0.738427	0.311237	2.37256	0.0176654	0.0873634	761.538	421.967	470.86	732.804	1006.04	1021.3
AT1G05180	317.573	0.27268	0.322589	0.845287	0.397951	0.660078	294.841	243.803	324.091	334.14	398.225	310.34
AT1G05190	3936.64	-1.22211	0.219665	-5.56348	2.64e-08	1.19e-06	6515.83	4783.15	5233.38	1985.25	2643.48	2458.74
AT1G05200	595.257	0.389151	0.302214	1.28767	0.197862	0.441085	675.203	465.443	406.162	662.52	776.8	585.414
AT1G05205	182.797	-0.582793	0.517496	-1.12618	0.26009	0.521527	345.339	144.918	167.737	173.983	188.633	76.1744
AT1G05210	39.2284	0.0016544	0.794081	0.00208341	0.998338	0.999525	38.2805	24.7213	54.5144	33.414	57.6378	26.8021
AT1G05220	11.4514	1.39905	1.61578	0.865867	0.386563	0.651108	0	11.082	7.78777	6.91325	28.8189	14.1064
AT1G05230	259.692	1.8594	0.411596	4.51753	6.26e-06	0.000133543	77.3755	155.148	104.236	388.294	301.288	531.81
AT1G05240	5.60694	3.2184	2.03424	1.58211	0.113625	0.312645	1.62896	1.70492	0	12.6743	9.16965	8.46382
AT1G05250	0.542986	-2.19073	3.96827	-0.552062	0.580906	NA	3.25792	0	0	0	0	0
AT1G05260	1.96492	4.83824	3.93583	1.22928	0.218966	NA	0	0	0	0	11.7895	0
AT1G05270	589.036	0.463814	0.27586	1.68134	0.0926967	0.273296	474.027	494.427	516.988	765.066	531.839	751.87
AT1G05280	0	NA	NA	NA	NA	NA	0	0	0	0	0	0
AT1G05290	0.950226	-3.00119	3.94197	-0.761343	0.446452	NA	5.70135	0	0	0	0	0
AT1G05291	3.29149	5.5806	3.92416	1.42211	0.154993	NA	0	0	0	0	0	19.7489
AT1G05300	34.8451	-0.265912	1.05753	-0.251447	0.801469	0.918254	8.14479	50.2951	55.7125	53.0016	5.2398	36.6766
AT1G05310	138.494	0.0508388	1.79794	0.0282761	0.977442	0.990747	195.475	0	212.666	164.766	166.364	91.6914
AT1G05320	206.397	0.259998	0.439852	0.591103	0.554452	0.781403	106.697	205.443	251.006	180.897	248.89	245.451
AT1G05330	143.311	0.307891	0.554665	0.555094	0.578831	0.798308	122.172	150.033	112.024	82.959	286.879	105.798
AT1G05340	1987.48	1.03028	0.312655	3.29525	0.000983351	0.00918038	715.113	1806.36	1398.2	3017.63	2593.7	2393.85
AT1G05350	739.411	0.191918	0.269372	0.712464	0.476178	0.724452	604.343	689.64	776.38	638.323	939.234	788.546
AT1G05360	262.054	0.677472	0.350983	1.93022	0.0535801	0.189703	156.38	213.967	234.232	305.335	301.288	361.123
AT1G05370	36.9013	-1.44525	1.21023	-1.1942	0.232401	0.486559	30.1357	62.2295	69.4908	0	51.088	8.46382
AT1G05380	224.535	0.582953	0.376003	1.5504	0.121047	0.325673	170.226	210.557	158.751	245.42	337.967	224.291
AT1G05385	352.779	-0.584742	0.332467	-1.7588	0.078612	0.245432	506.606	407.476	355.841	231.594	347.137	268.021
AT1G05390	0	NA	NA	NA	NA	NA	0	0	0	0	0	0
AT1G05400	5.41248	0.272208	2.39911	0.113462	0.909664	0.962857	3.25792	0	11.3821	0	6.54975	11.2851
AT1G05410	135.203	-0.0842483	0.49572	-0.169951	0.865048	0.944184	162.081	160.262	95.2504	99.0899	187.323	107.208
AT1G05420	4.01031	0.48686	2.70594	0.179923	0.857213	0.9401	3.25792	6.81968	0	12.6743	1.30995	0
AT1G05430	297.038	-0.694862	0.387459	-1.79338	0.0729119	0.23317	359.185	398.099	343.86	135.961	230.551	314.572
AT1G05440	0	NA	NA	NA	NA	NA	0	0	0	0	0	0
AT1G05450	0	NA	NA	NA	NA	NA	0	0	0	0	0	0
AT1G05460	52.7611	-0.0432842	0.702727	-0.0615947	0.950886	0.979554	58.6425	54.5574	47.3257	33.414	37.9885	84.6382
AT1G05470	71.1084	0.579592	0.833291	0.695545	0.486714	0.732434	9.77375	52	109.029	103.699	39.2985	112.851
AT1G05490	0	NA	NA	NA	NA	NA	0	0	0	0	0	0
AT1G05500	601.145	-0.0673186	0.318784	-0.211173	0.832752	0.930131	570.135	809.837	466.068	566.886	727.022	466.921
AT1G05510	17.3145	0.624253	1.43946	0.43367	0.664528	0.848189	11.4027	0	29.3539	17.2831	27.5089	18.3383
AT1G05520	152.922	-0.405067	0.440552	-0.919453	0.357858	0.626455	202.805	166.23	153.958	141.722	161.124	91.6914
AT1G05530	0	NA	NA	NA	NA	NA	0	0	0	0	0	0
AT1G05540	48.8696	-0.186815	0.736005	-0.253823	0.799633	0.917513	47.2398	40.9181	67.6937	21.892	57.6378	57.8361
AT1G05550	4.47367	-5.24283	3.16176	-1.6582	0.0972773	0.283029	0	7.67214	19.1699	0	0	0
AT1G05560	79.8455	-0.441733	0.69265	-0.637743	0.523641	0.759981	111.584	84.3935	79.6748	20.7397	64.1875	118.494
AT1G05562	0	NA	NA	NA	NA	NA	0	0	0	0	0	0
AT1G05570	39.5324	0.582172	0.78559	0.741064	0.458655	0.709648	24.4344	21.3115	49.1228	62.2192	40.6084	39.4978
AT1G05575	535.539	0.338612	0.387966	0.872789	0.382778	0.647932	246.787	627.41	544.545	615.279	423.114	756.101
AT1G05577	1.3835	3.26318	3.95113	0.825885	0.408869	NA	0	0	0.599059	1.15221	6.54975	0
AT1G05580	4.77012	-5.33172	3.16877	-1.68258	0.0924556	0.273066	26.0633	2.55738	0	0	0	0
AT1G05590	90.417	-0.909018	0.683919	-1.32913	0.183804	0.422524	148.235	125.312	80.2739	17.2831	100.866	70.5319
AT1G05600	50.6073	0.448207	0.748358	0.59892	0.549226	0.777797	34.2081	32.3935	61.7031	77.1979	26.199	71.9425
AT1G05610	1.62812	3.51371	3.94409	0.89088	0.372994	NA	0	0	0.599059	0	9.16965	0
AT1G05615	0	NA	NA	NA	NA	NA	0	0	0	0	0	0
AT1G05620	251.512	0.522138	0.348426	1.49856	0.133987	0.347404	194.66	206.295	218.657	358.337	284.259	246.861
AT1G05630	266.446	0.483451	0.416806	1.15989	0.246092	0.503849	158.823	248.918	258.793	373.315	180.773	378.051
AT1G05640	12.2993	1.38446	1.79095	0.773031	0.439504	0.694926	0.814479	17.9016	1.79718	12.6743	40.6084	0
AT1G05650	0	NA	NA	NA	NA	NA	0	0	0	0	0	0
AT1G05660	0.142077	-0.176531	4.08047	-0.0432623	0.965492	NA	0	0.852459	0	0	0	0
AT1G05670	280.908	0.395807	0.524523	0.754603	0.450487	0.703336	261.448	332.459	134.189	177.44	589.477	190.436
AT1G05675	2426.6	0.446271	0.29487	1.51345	0.130165	0.341007	2035.38	2351.94	1775.61	2008.3	4170.88	2217.52
AT1G05680	221.752	-3.23146	0.603024	-5.35876	8.38e-08	3.22e-06	547.33	236.984	418.143	55.306	7.8597	64.8893
AT1G05690	106.249	1.23971	0.623319	1.98888	0.0467142	0.172938	19.5475	77.5738	92.2551	127.895	146.714	173.508
AT1G05700	3.63569	0.894838	3.13056	0.285839	0.775001	NA	0	7.67214	0	11.5221	2.6199	0
AT1G05710	151.056	0.127363	0.435138	0.292696	0.769754	0.904367	114.842	184.131	134.189	142.874	144.094	186.204
AT1G05720	375.435	-0.256371	0.345333	-0.742386	0.457854	0.709226	453.665	368.262	404.365	337.597	454.552	234.166
AT1G05730	0	NA	NA	NA	NA	NA	0	0	0	0	0	0
AT1G05740	0	NA	NA	NA	NA	NA	0	0	0	0	0	0
AT1G05750	18.2334	0.176195	1.38036	0.127644	0.89843	0.958529	15.4751	17.9016	17.9718	24.1964	0	33.8553
AT1G05760	0	NA	NA	NA	NA	NA	0	0	0	0	0	0
AT1G05770	0.599059	-2.35751	3.96161	-0.595088	0.551785	NA	0	0	3.59435	0	0	0
AT1G05780	124.897	-0.155197	0.470613	-0.329777	0.741569	0.890016	150.679	98.0328	146.17	138.265	123.135	93.102
AT1G05785	288.835	0.417361	0.344723	1.21071	0.226005	0.478041	291.583	223.344	227.043	311.096	275.089	404.853
AT1G05790	235.677	0.0935767	0.379765	0.246407	0.805367	0.919793	223.982	225.902	234.232	217.767	328.797	183.383
AT1G05800	0	NA	NA	NA	NA	NA	0	0	0	0	0	0
AT1G05805	520.683	0.208017	0.320503	0.649033	0.516317	0.753375	403.167	537.049	509.799	758.153	434.903	481.027
AT1G05810	135.079	0.62896	0.610825	1.02969	0.303156	0.568944	52.1267	168.787	97.6466	240.811	183.393	67.7106
AT1G05820	52.9006	1.21213	0.787908	1.53841	0.123948	0.330491	13.0317	54.5574	28.1558	73.7413	39.2985	108.619
AT1G05830	673.586	0.84001	0.278349	3.01783	0.00254594	0.0198117	460.995	564.328	423.535	755.848	1062.37	774.44
AT1G05835	31.2585	-1.9069	0.92645	-2.05829	0.0395624	0.154145	20.362	58.8197	68.8918	12.6743	18.3393	8.46382
AT1G05840	418.33	0.402043	0.309426	1.29932	0.193834	0.435971	326.606	443.279	311.511	447.057	425.734	555.791
AT1G05850	6576.79	-0.282669	0.230382	-1.22695	0.21984	0.469789	5776.29	7879.28	8001.63	6958.18	4693.55	6151.79
AT1G05860	247.103	0.420925	0.388995	1.08208	0.279215	0.543577	171.855	228.459	233.633	284.595	369.406	194.668
AT1G05870	834.432	0.722558	0.299447	2.41297	0.0158229	0.0806978	701.266	436.459	751.22	1177.56	1131.8	808.295
AT1G05880	0	NA	NA	NA	NA	NA	0	0	0	0	0	0
AT1G05890	803.699	0.450325	0.235531	1.91196	0.0558817	0.195343	640.995	658.951	737.442	861.852	969.363	953.591
AT1G05894	22.2407	1.22354	1.38509	0.883364	0.37704	0.643239	24.4344	0	15.5755	48.3927	37.9885	7.05319
AT1G05900	408.393	0.250235	0.34713	0.720868	0.470991	0.720263	443.891	347.803	327.685	389.446	615.676	325.857
AT1G05910	180.688	0.398467	0.431126	0.924248	0.355357	0.623812	114.027	197.771	155.755	148.635	243.651	224.291
AT1G05920	3.0289	0.573443	3.30525	0.173494	0.862263	NA	7.33031	0	0	6.91325	3.92985	0
AT1G05925	0	NA	NA	NA	NA	NA	0	0	0	0	0	0
AT1G05930	7.92618	-1.32542	1.83839	-0.720967	0.47093	0.720225	17.9185	13.6394	2.39624	0	6.54975	7.05319
AT1G05940	523.031	-0.233381	0.279618	-0.834642	0.403919	0.665092	585.61	564.328	545.743	418.252	585.547	438.708
AT1G05950	41.6738	-0.0424373	0.869185	-0.0488243	0.961059	0.983284	72.4886	36.6558	17.9718	71.4369	27.5089	23.9808
AT1G05960	335.853	0.0537783	0.331526	0.162214	0.871137	0.946978	346.968	342.689	299.53	377.924	396.915	251.093
AT1G05970	251.621	-0.0674794	0.382626	-0.176359	0.860012	0.941753	188.145	281.312	303.124	279.987	273.779	183.383
AT1G05980	0	NA	NA	NA	NA	NA	0	0	0	0	0	0
AT1G05990	0.950226	-3.00119	3.94197	-0.761343	0.446452	NA	5.70135	0	0	0	0	0
AT1G06000	185.889	0.942469	0.539545	1.74678	0.0806749	0.249397	111.584	156	114.42	410.186	90.3865	232.755
AT1G06002	0.555646	-2.22177	3.96697	-0.560068	0.575433	NA	1.62896	1.70492	0	0	0	0
AT1G06010	84.4017	1.01531	0.55601	1.82606	0.0678411	0.222468	73.3031	40.9181	53.3163	95.6333	102.176	141.064
AT1G06020	24.2736	1.35712	1.00948	1.34437	0.178827	0.415447	8.95927	5.96722	25.7595	33.414	41.9184	29.6234
AT1G06030	32.9271	0.147115	1.03512	0.142124	0.886982	0.953084	37.466	48.5902	7.78777	38.0229	7.8597	57.8361
AT1G06040	4086.17	-0.500959	0.201457	-2.48668	0.0128941	0.0694867	4948.77	4344.99	5071.03	2898.96	3489.71	3763.58
AT1G06050	163.292	-0.439298	0.418001	-1.05095	0.293282	0.559031	228.869	190.098	144.972	120.982	146.714	148.117
AT1G06060	407.634	-0.183346	0.353973	-0.517967	0.604481	0.814991	501.719	379.344	419.341	409.034	238.411	497.955
AT1G06070	333.93	0.19418	0.313174	0.620041	0.535231	0.767973	335.565	309.443	289.345	294.965	387.745	386.515
AT1G06080	166.413	-0.486075	0.568603	-0.854859	0.392629	0.656491	175.927	171.344	234.831	40.3273	191.253	184.793
AT1G06090	0	NA	NA	NA	NA	NA	0	0	0	0	0	0
AT1G06100	10.158	0.706148	1.93922	0.36414	0.715753	0.875148	0.814479	8.52459	13.7784	1.15221	36.6786	0
AT1G06110	831.141	-0.00800463	0.249353	-0.0321016	0.974391	0.989175	924.434	756.984	818.914	770.827	968.053	747.638
AT1G06120	2.29291	1.19217	3.24599	0.367273	0.713416	NA	0.814479	3.40984	0	6.91325	2.6199	0
AT1G06130	1375.64	0.354401	0.223559	1.58527	0.112905	0.311309	1062.08	1271.02	1289.17	1420.67	1739.61	1471.29
AT1G06135	25.4228	-0.609071	1.03028	-0.59117	0.554407	0.781395	34.2081	9.37705	48.5238	23.0442	27.5089	9.87446
AT1G06137	0.192035	1.74702	4.08047	0.428142	0.668548	NA	0	0	0	1.15221	0	0
AT1G06140	13.6651	1.00472	1.68315	0.59693	0.550554	0.778725	0	17.0492	10.184	1.15221	18.3393	35.2659
AT1G06148	5.64108	-2.39608	2.25014	-1.06486	0.28694	0.551626	25.2489	2.55738	0.599059	0	2.6199	2.82127
AT1G06149	0	NA	NA	NA	NA	NA	0	0	0	0	0	0
AT1G06150	23.4493	-0.412995	1.70295	-0.242518	0.808379	0.920793	11.4027	69.0492	0	28.8052	31.4388	0
AT1G06160	55.0212	-0.724388	1.09415	-0.662055	0.507936	0.746858	39.095	111.672	55.1134	87.5678	36.6786	0
AT1G06170	0	NA	NA	NA	NA	NA	0	0	0	0	0	0
AT1G06180	52.9288	-0.369525	1.07667	-0.343212	0.731439	0.883685	48.0543	47.7377	83.2692	59.9148	78.597	0
AT1G06190	927.453	-1.01601	0.318132	-3.19369	0.00140466	0.0122872	1305.61	1299.15	1118.44	394.055	897.315	550.148
AT1G06200	1216.75	-0.00328607	0.226102	-0.0145335	0.988404	0.995776	1167.15	1242.03	1244.84	1038.14	1375.45	1232.9
AT1G06210	496.332	-0.274582	0.337244	-0.814194	0.415534	0.674669	675.203	508.918	446.898	606.061	417.874	323.036
AT1G06220	416.421	-0.974713	0.397762	-2.45049	0.0142661	0.0749146	582.353	478.23	596.064	458.579	206.972	176.33
AT1G06225	0	NA	NA	NA	NA	NA	0	0	0	0	0	0
AT1G06230	427.376	0.556074	0.318757	1.74451	0.0810707	0.250009	417.828	321.377	298.93	412.49	634.016	479.617
AT1G06240	244.962	-1.34665	0.526994	-2.55535	0.0106081	0.0597927	491.945	325.64	237.227	58.7626	247.58	108.619
AT1G06250	90.1342	0.461113	0.623347	0.739737	0.459459	0.710237	82.2624	40.9181	104.236	103.699	153.264	56.4255
AT1G06260	0	NA	NA	NA	NA	NA	0	0	0	0	0	0
AT1G06265	86.5695	0.49206	0.592602	0.830337	0.406348	0.667114	55.3846	94.623	65.8965	77.1979	157.194	69.1212
AT1G06270	23.7609	0.542956	1.62564	0.333995	0.738384	0.887994	0	23.8689	34.1464	42.6317	41.9184	0
AT1G06280	2.17194	-4.19624	3.92219	-1.06987	0.284677	NA	13.0317	0	0	0	0	0
AT1G06290	227.919	0.0752732	0.401425	0.187515	0.851257	0.937818	179.185	238.689	248.01	278.834	151.954	270.842
AT1G06310	0	NA	NA	NA	NA	NA	0	0	0	0	0	0
AT1G06320	0.271493	-1.18392	4.02925	-0.293832	0.768887	NA	1.62896	0	0	0	0	0
AT1G06330	0	NA	NA	NA	NA	NA	0	0	0	0	0	0
AT1G06340	7.11257	-3.86892	2.14222	-1.80603	0.070913	0.228997	20.362	5.11476	14.3774	0	0	2.82127
AT1G06350	0	NA	NA	NA	NA	NA	0	0	0	0	0	0
AT1G06360	163.502	-1.044	0.648527	-1.60979	0.107443	0.301157	53.7556	215.672	391.186	129.047	134.925	56.4255
AT1G06370	311.987	0.527582	0.334742	1.57609	0.115006	0.315003	237.828	220.787	307.916	437.839	326.177	341.374
AT1G06380	37.1546	-0.768189	1.18464	-0.64846	0.516687	0.75356	20.362	47.7377	72.4861	58.7626	23.5791	0
AT1G06390	1146.73	-0.0770894	0.25503	-0.302276	0.762442	0.901088	1106.06	1345.18	1080.7	874.526	1344.01	1129.92
AT1G06400	1407.47	-0.185	0.244001	-0.758195	0.448335	0.70164	1551.58	1384.39	1556.95	1557.79	1006.04	1388.07
AT1G06410	2638.73	0.6559	0.233908	2.8041	0.00504574	0.0338987	1633.84	2401.38	2111.68	3223.88	2741.72	3719.85
AT1G06420	132.919	1.29098	0.623801	2.06953	0.0384963	0.151487	136.018	46.8853	48.5238	79.5024	276.399	210.185
AT1G06430	1012.74	-1.43402	0.265632	-5.39853	6.72e-08	2.64e-06	1687.6	1372.46	1374.24	409.034	584.237	648.893
AT1G06440	12.2235	1.49158	1.89644	0.786513	0.431567	0.688482	0	14.4918	4.79247	35.7185	0	18.3383
AT1G06450	93.2291	0.429741	0.611399	0.702882	0.48213	0.729154	31.7647	108.262	98.2457	102.547	129.685	88.8701
AT1G06460	1041.12	-1.34175	0.231825	-5.78778	7.13e-09	3.76e-07	1575.2	1384.39	1519.21	523.102	578.998	665.821
AT1G06470	345.939	0.577453	0.332322	1.73763	0.0822757	0.252292	249.231	246.361	336.671	324.923	475.512	442.94
AT1G06475	12.8302	-1.16498	1.4433	-0.807163	0.419572	0.678544	3.25792	6.81968	43.1322	10.3699	9.16965	4.23191
AT1G06480	0	NA	NA	NA	NA	NA	0	0	0	0	0	0
AT1G06490	12.8114	-0.413547	1.8846	-0.219434	0.826312	0.927914	30.1357	0	13.7784	8.06546	24.889	0
AT1G06500	110.606	-0.764826	0.608151	-1.25763	0.208527	0.455726	108.326	108.262	201.284	106.003	108.726	31.034
AT1G06510	282.45	-1.11255	0.350253	-3.17642	0.00149105	0.0128972	367.33	301.771	489.431	175.136	184.703	176.33
AT1G06515	733.275	-0.0401142	0.317048	-0.126524	0.899317	0.958565	579.909	786.82	863.244	531.168	999.491	639.019
AT1G06520	78.1788	0.414943	0.820517	0.505709	0.613061	0.819997	31.7647	109.967	59.3068	95.6333	14.4094	157.991
AT1G06530	525.613	0.0828214	0.326021	0.254037	0.799467	0.91748	440.633	481.64	609.243	553.06	699.513	369.587
AT1G06540	9.56775	-1.7627	2.3443	-0.751908	0.452107	0.704723	0	5.96722	38.3398	0	13.0995	0
AT1G06550	393.74	0.74615	0.389762	1.91437	0.0555728	0.194805	255.746	322.23	304.322	339.901	783.35	356.891
AT1G06560	111.528	-0.269674	0.609934	-0.442136	0.658391	0.845051	64.3438	154.295	147.369	165.918	86.4567	50.7829
AT1G06570	1357.86	-1.89636	0.27263	-6.95579	3.51e-12	4.55e-10	2089.14	2145.64	2188.36	796.176	445.383	482.438
AT1G06580	71.3301	0.575857	0.742788	0.775265	0.438183	0.69381	55.3846	54.5574	61.7031	18.4353	116.586	121.315
AT1G06590	63.2663	-0.103814	0.802347	-0.129387	0.897051	0.957906	58.6425	19.6066	118.015	35.7185	43.2283	104.387
AT1G06610	0	NA	NA	NA	NA	NA	0	0	0	0	0	0
AT1G06620	907.12	1.04874	0.358086	2.92872	0.00340358	0.0249208	297.285	770.623	705.692	1548.57	1096.43	1024.12
AT1G06630	1000.95	1.07731	0.292496	3.68316	0.000230364	0.00278651	658.099	520.853	751.819	1732.92	949.713	1392.3
AT1G06640	2632.67	0.45476	0.345724	1.31539	0.18838	0.429073	1114.21	2796.07	2753.28	4120.3	2824.25	2187.9
AT1G06645	994.352	0.663659	0.289421	2.29306	0.0218445	0.101694	823.438	837.115	648.781	1197.14	1603.38	856.257
AT1G06650	1800.49	-0.545537	0.235704	-2.3145	0.0206405	0.0978455	2123.35	2235.15	2051.78	1357.3	1197.29	1838.06
AT1G06660	21.1882	0.208698	1.0915	0.191203	0.848366	0.93695	13.8461	14.4918	30.552	13.8265	44.5383	9.87446
AT1G06670	324.947	0.797449	0.334414	2.38462	0.0170969	0.0851993	298.099	181.574	232.435	432.078	421.804	383.693
AT1G06680	42687.5	-0.919659	0.193326	-4.75703	1.96e-06	4.97e-05	61265.1	48781.1	57504.9	26907.5	33710.2	27956
AT1G06690	606.071	-0.426711	0.28041	-1.52174	0.128074	0.337093	763.167	726.295	595.465	422.86	512.19	616.448
AT1G06700	1066.26	0.676796	0.225396	3.0027	0.00267598	0.0206289	730.588	895.082	836.286	1359.61	1227.42	1348.57
AT1G06710	7.24998	-1.28657	2.5052	-0.513562	0.607558	0.816842	0	23.0164	7.78777	0	0	12.6957
AT1G06720	104.732	-0.265686	0.517616	-0.513287	0.607751	0.816991	125.43	132.131	85.6654	87.5678	127.065	70.5319
AT1G06730	151.349	-0.0383869	0.501889	-0.0764849	0.939033	0.97527	180	121.902	158.152	115.221	239.721	93.102
AT1G06740.1	10.4438	1.1234	1.48788	0.755034	0.450228	0.703204	3.25792	6.81968	9.58494	4.60883	32.7487	5.64255
AT1G06750	12.6777	0.666272	1.4141	0.471163	0.637525	0.834305	3.25792	9.37705	16.7737	34.5662	7.8597	4.23191
AT1G06760	340.932	-0.614667	0.49477	-1.24233	0.214116	0.463511	417.013	233.574	587.078	466.644	129.685	211.596
AT1G06770	68.1557	0.669513	0.749553	0.893216	0.371741	0.638496	82.2624	20.459	55.1134	71.4369	140.165	39.4978
AT1G06780	321.795	0.556557	0.47429	1.17345	0.240615	0.496829	376.289	286.426	119.213	329.532	572.448	246.861
AT1G06790	42.0758	-0.433595	0.886366	-0.489183	0.624712	0.82687	64.3438	28.9836	51.5191	18.4353	14.4094	74.7638
AT1G06800	154.834	0.510095	0.506157	1.00778	0.313561	0.580354	83.0769	166.23	134.189	277.682	149.334	118.494
AT1G06810	4.82453	-0.172875	2.87575	-0.0601148	0.952064	0.979911	0	15.3443	0	0	6.54975	7.05319
AT1G06820	436.996	-0.106466	0.308424	-0.345193	0.729949	0.882903	478.914	363.148	516.988	447.057	341.897	473.974
AT1G06830	24.3554	2.77014	1.3094	2.11559	0.0343801	0.140166	0.814479	16.1967	1.79718	6.91325	48.4681	71.9425
AT1G06840	312.136	0.979023	0.431891	2.26683	0.0234006	0.106714	92.8506	267.672	269.577	440.143	368.096	434.476
AT1G06850	289.873	1.05701	0.379805	2.78304	0.00538523	0.0356366	221.538	209.705	133.59	331.836	324.867	517.704
AT1G06860	0	NA	NA	NA	NA	NA	0	0	0	0	0	0
AT1G06870	233.044	-0.755406	0.412898	-1.82952	0.0673214	0.221268	349.412	312.853	216.26	228.137	115.276	176.33
AT1G06880	1.56318	-0.578418	3.75618	-0.153991	0.877617	NA	0.814479	0	4.79247	1.15221	2.6199	0
AT1G06890	163.837	0.405409	0.480488	0.843744	0.398812	0.660594	166.154	115.934	140.779	217.767	96.9363	245.451
AT1G06900	278.711	0.226001	0.367882	0.614329	0.538998	0.769811	328.235	172.197	270.176	294.965	292.119	314.572
AT1G06910	111.054	-0.410145	0.583497	-0.702909	0.482112	0.729154	55.3846	152.59	171.93	70.2847	87.7666	128.368
AT1G06920	1.35747	-3.51704	3.93143	-0.894597	0.371003	NA	8.14479	0	0	0	0	0
AT1G06923	0	NA	NA	NA	NA	NA	0	0	0	0	0	0
AT1G06925	0.142077	-0.176531	4.08047	-0.0432623	0.965492	NA	0	0.852459	0	0	0	0
AT1G06930	1.59084	1.10679	3.84737	0.287676	0.773595	NA	0	0	2.9953	0	6.54975	0
AT1G06950	727.453	-0.905685	0.261888	-3.45829	0.000543619	0.005646	1069.41	964.984	811.725	503.515	576.378	438.708
AT1G06960	321.745	-0.556641	0.408836	-1.36153	0.173347	0.406666	463.439	330.754	355.242	262.703	377.265	141.064
AT1G06970	4.33538	-5.19323	2.82155	-1.84056	0.0656867	0.217708	16.2896	8.52459	1.19812	0	0	0
AT1G06980	40.9921	-0.0657205	0.888529	-0.0739655	0.941038	0.976044	48.8687	42.623	34.1464	8.06546	44.5383	67.7106
AT1G06990	10.0365	1.70071	2.08426	0.815978	0.414513	0.673826	0	9.37705	4.79247	0	43.2283	2.82127
AT1G07000	909.126	0.244433	0.297381	0.821953	0.411104	0.670826	602.714	825.181	1068.72	1201.75	787.28	969.108
AT1G07010	711.896	-1.30056	0.331425	-3.92415	8.7e-05	0.00123372	1135.38	1013.57	888.405	235.05	510.88	488.08
AT1G07020	419.602	0.00387998	0.306653	0.0126527	0.989905	0.99634	339.638	473.115	444.502	448.209	463.722	348.427
AT1G07025	3.20628	3.39207	3.21727	1.05433	0.291731	NA	0	1.70492	0	0	10.4796	7.05319
AT1G07030	252.899	-0.701897	0.47429	-1.47989	0.138903	0.355252	237.828	313.705	388.19	265.008	79.9069	232.755
AT1G07040	228.931	-1.09695	0.487463	-2.25032	0.0244286	0.109938	447.149	260.853	228.241	197.028	66.8074	173.508
AT1G07050	5.388	-0.313205	3.15868	-0.0991568	0.921014	0.967607	17.9185	0	0	0	14.4094	0
AT1G07051	0	NA	NA	NA	NA	NA	0	0	0	0	0	0
AT1G07060	0	NA	NA	NA	NA	NA	0	0	0	0	0	0
AT1G07070	83.1836	-0.469412	0.581767	-0.806874	0.419739	0.678569	87.1493	74.164	128.199	61.067	49.7781	98.7446
AT1G07080	4195.4	-0.154507	0.193732	-0.797528	0.425144	0.683382	4466.6	4107.15	4685.84	4107.62	4311.04	3494.15
AT1G07090	37.3625	-0.695214	0.835431	-0.832162	0.405317	0.666359	20.362	48.5902	69.4908	20.7397	35.3686	29.6234
AT1G07100	0	NA	NA	NA	NA	NA	0	0	0	0	0	0
AT1G07110	3189.07	0.490721	0.243789	2.01289	0.0441265	0.166263	2630.77	2739.8	2584.94	2957.72	4992.22	3228.95
AT1G07119	0.135747	-0.176531	4.08047	-0.0432623	0.965492	NA	0.814479	0	0	0	0	0
AT1G07120	0.470212	2.75951	4.02805	0.685074	0.493297	NA	0	0	0	0	0	2.82127
AT1G07128	17.3653	1.24849	1.07863	1.15748	0.247075	0.504989	11.4027	11.082	8.38683	14.9787	30.1288	28.2127
AT1G07130	15.739	1.36547	1.24562	1.09622	0.272982	0.535881	13.8461	10.2295	2.39624	9.21766	24.889	33.8553
AT1G07135	11411	0.608821	0.623988	0.975693	0.329217	0.596446	6022.26	9275.61	11817	7919.13	24540.6	8891.25
AT1G07140	1505.2	-0.483215	0.239406	-2.01839	0.0435504	0.164651	1773.12	1938.49	1553.36	1306.6	998.182	1461.42
AT1G07150	211.935	1.0719	0.581999	1.84176	0.0655109	0.217439	61.0859	235.279	113.821	440.143	116.586	304.698
AT1G07160	292.888	-1.81942	0.544084	-3.34401	0.000825775	0.00793375	174.299	798.755	396.577	139.417	183.393	64.8893
AT1G07170	449.936	-0.389159	0.325506	-1.19555	0.231872	0.48586	632.85	428.787	469.662	500.058	353.686	314.572
AT1G07175	0.599059	-2.35751	3.96161	-0.595088	0.551785	NA	0	0	3.59435	0	0	0
AT1G07180	1678.27	-0.770613	0.228928	-3.36618	0.000762165	0.00742539	2380.72	1846.43	2120.67	1036.99	1371.52	1313.3
AT1G07190	4.26699	0.178404	2.94734	0.0605306	0.951733	0.979697	0	0	11.9812	5.76104	7.8597	0
AT1G07200	188.891	1.10224	0.424265	2.59801	0.00937658	0.0545467	112.398	94.623	152.76	281.139	182.083	310.34
AT1G07210	124.671	-2.02046	0.817087	-2.47276	0.0134072	0.0715111	177.556	247.213	175.524	50.6972	95.6263	1.41064
AT1G07220	218.697	-0.220796	0.40354	-0.547148	0.584277	0.801003	321.719	158.557	225.845	190.114	204.352	211.596
AT1G07230	247.702	-0.389596	0.387098	-1.00645	0.314197	0.581056	214.208	339.279	289.345	236.203	153.264	253.915
AT1G07240	586.254	0.582121	0.358943	1.62176	0.104854	0.297167	376.289	580.525	452.29	1013.94	424.424	670.053
AT1G07250	417.555	-0.312544	0.382563	-0.816973	0.413944	0.673282	597.013	348.656	442.705	556.517	288.189	272.253
AT1G07260	37.5642	0.22787	0.93889	0.242701	0.808237	0.920793	62.7149	9.37705	31.7501	40.3273	62.8776	18.3383
AT1G07270	7.19248	0.145035	2.22425	0.0652063	0.94801	0.97849	16.2896	0	4.19341	0	17.0293	5.64255
AT1G07280	881.299	-0.636498	0.3052	-2.08551	0.0370228	0.147563	1326.79	1063.02	828.499	824.981	472.892	771.618
AT1G07290	16.2093	1.35063	1.14741	1.17711	0.239151	0.495169	6.51583	11.9344	8.98589	36.8707	11.7895	21.1596
AT1G07300	362.594	1.1982	0.319178	3.75401	0.00017403	0.00221421	197.104	263.41	200.086	460.883	601.267	452.815
AT1G07310	1104.11	-0.34572	0.248859	-1.38922	0.164766	0.394899	1008.33	1246.3	1452.72	1085.38	978.532	853.435
AT1G07320	1955.83	-1.30785	0.213594	-6.12306	9.18e-10	5.9e-08	2984.25	2766.23	2608.3	1047.36	1304.71	1024.12
AT1G07330	10.2619	0.809637	2.07962	0.38932	0.697039	0.86565	21.1765	0	1.19812	0	22.2691	16.9276
AT1G07340	1.45903	-2.42449	3.93376	-0.616329	0.537677	NA	4.88687	2.55738	0	0	1.30995	0
AT1G07350	901.108	-0.195952	0.235869	-0.830764	0.406107	0.667003	951.312	925.771	1009.41	887.2	723.092	909.861
AT1G07360	728.683	-1.34833	0.258403	-5.21793	1.81e-07	6.18e-06	1129.68	947.082	1062.73	473.558	347.137	411.906
AT1G07370	66.7569	1.42954	0.618223	2.31233	0.0207593	0.0982005	30.9502	39.2131	38.3398	127.895	103.486	60.6574
AT1G07380	41.3973	-1.69861	1.0276	-1.65299	0.0983328	0.284879	103.439	63.9345	22.7642	34.5662	22.2691	1.41064
AT1G07390	42.8535	0.564146	0.792471	0.711882	0.476538	0.724727	57.828	25.5738	20.368	36.8707	44.5383	71.9425
AT1G07400	31.7744	-0.607912	0.865652	-0.702259	0.482517	0.729521	45.6108	23.8689	45.5285	14.9787	36.6786	23.9808
AT1G07410	13.7599	-0.209085	1.67258	-0.125007	0.900518	0.95918	23.6199	9.37705	11.3821	36.8707	1.30995	0
AT1G07420	457.22	-0.87079	0.39926	-2.18101	0.0291826	0.124764	371.402	848.197	553.531	194.723	390.365	385.104
AT1G07430	723.661	2.79234	0.388706	7.1837	6.79e-13	1.06e-10	209.321	113.377	224.647	1939.17	1113.46	741.995
AT1G07440	971.851	0.685468	0.246305	2.783	0.00538585	0.0356366	882.081	631.672	721.866	1119.95	1323.05	1152.49
AT1G07450	145.378	-0.326095	0.466593	-0.698887	0.484623	0.730837	119.728	196.918	168.336	104.851	106.106	176.33
AT1G07460	0.40724	-1.77336	3.98865	-0.4446	0.656609	NA	2.44344	0	0	0	0	0
AT1G07470	692.705	0.562188	0.397997	1.41254	0.157791	0.384505	381.991	637.64	658.965	1382.65	564.588	530.4
AT1G07473	78.1243	0.498025	0.59144	0.842054	0.399757	0.661422	47.2398	50.2951	96.4485	73.7413	100.866	100.155
AT1G07476	14.0561	2.50221	1.22792	2.03776	0.0415738	0.159178	6.51583	2.55738	3.59435	21.892	31.4388	18.3383
AT1G07480	1221.56	0.531245	0.220165	2.41294	0.0158244	0.0806978	1037.65	1051.08	909.372	1588.89	1393.79	1348.57
AT1G07485	20.9725	1.98885	1.14712	1.73378	0.0829568	0.253493	10.5882	9.37705	5.39153	5.76104	52.398	42.3191
AT1G07490	0	NA	NA	NA	NA	NA	0	0	0	0	0	0
AT1G07500	255.613	0.471774	0.42476	1.11068	0.266704	0.529011	219.909	135.541	286.949	366.402	328.797	196.079
AT1G07510	386.648	0.673831	0.354778	1.8993	0.057525	0.199391	230.498	306.033	357.039	525.407	318.318	582.593
AT1G07520	154.892	-0.261225	0.469562	-0.556316	0.577995	0.797551	155.565	180.721	170.133	82.959	201.732	138.242
AT1G07530	271.09	0.785187	0.416603	1.88473	0.0594656	0.203697	146.606	165.377	284.553	228.137	377.265	424.602
AT1G07540	3.79404	-5.00592	3.87692	-1.29121	0.196632	NA	0	0	22.7642	0	0	0
AT1G07550	0	NA	NA	NA	NA	NA	0	0	0	0	0	0
AT1G07560	8.67189	3.28535	2.3207	1.41567	0.156873	0.38301	4.88687	0	0	28.8052	18.3393	0
AT1G07570	227.509	0.135396	0.364357	0.371603	0.710188	0.872424	219.909	254.885	176.123	260.399	244.961	208.774
AT1G07580	0.986464	3.85189	3.96413	0.971688	0.331206	NA	0	0	0	4.60883	1.30995	0
AT1G07590	1245.89	1.73123	0.28017	6.1792	6.44e-10	4.4e-08	768.868	468	493.625	1531.28	1981.95	2231.63
AT1G07600	0	NA	NA	NA	NA	NA	0	0	0	0	0	0
AT1G07610	105.135	0.688664	0.590701	1.16584	0.243678	0.500522	105.068	75.8689	60.505	74.8935	93.0064	221.47
AT1G07615	73.126	-0.751571	0.626782	-1.1991	0.230491	0.48417	100.181	63.082	112.024	56.4582	75.9771	31.034
AT1G07620	26.6771	-0.550631	1.27182	-0.432948	0.665053	0.848426	30.1357	30.6885	34.1464	0	15.7194	49.3723
AT1G07630	475.869	0.387986	0.311703	1.24473	0.21323	0.462239	421.9	486.754	328.883	657.911	525.29	434.476
AT1G07640	22.6067	1.96261	1.2793	1.53413	0.124997	0.332072	8.95927	0	18.5708	36.8707	45.8482	25.3915
AT1G07645	0	NA	NA	NA	NA	NA	0	0	0	0	0	0
AT1G07650	716.88	0.808562	0.386567	2.09165	0.03647	0.145967	268.778	647.869	646.385	1063.49	564.588	1110.17
AT1G07660	666.814	0.386668	0.273195	1.41536	0.156964	0.383046	453.665	600.131	679.932	831.894	707.373	727.889
AT1G07670	270.548	-0.0324555	0.362791	-0.0894604	0.928716	0.971085	194.66	306.033	319.898	278.834	231.861	292.002
AT1G07680	0	NA	NA	NA	NA	NA	0	0	0	0	0	0
AT1G07690	0	NA	NA	NA	NA	NA	0	0	0	0	0	0
AT1G07700	1575.01	-0.654477	0.29677	-2.20533	0.0274308	0.119741	1725.07	1903.54	2149.42	755.848	1683.29	1232.9
AT1G07702	0	NA	NA	NA	NA	NA	0	0	0	0	0	0
AT1G07705	169.451	-0.466398	0.497146	-0.93815	0.348167	0.616893	245.973	196.918	147.369	183.201	175.533	67.7106
AT1G07710	39.0241	0.269014	0.922662	0.291563	0.770621	0.904881	17.1041	39.2131	49.7219	11.5221	79.9069	36.6766
AT1G07720	934.46	1.41292	0.350724	4.02856	5.61e-05	0.000862912	333.122	494.427	702.696	1835.47	868.497	1372.55
AT1G07725	0.568306	-2.25225	3.96572	-0.56793	0.570082	NA	0	3.40984	0	0	0	0
AT1G07728	2.13144	2.72064	3.74748	0.725991	0.467844	NA	0	1.70492	0	0	2.6199	8.46382
AT1G07730	0.218325	1.74702	4.08047	0.428142	0.668548	NA	0	0	0	0	1.30995	0
AT1G07740	2.22432	-2.07984	3.77858	-0.550429	0.582025	NA	0	0	10.7831	1.15221	0	1.41064
AT1G07745	370.172	-0.237468	0.351748	-0.675108	0.499607	0.74094	367.33	521.705	313.308	402.121	365.476	251.093
AT1G07747	0.499216	-2.09769	3.97232	-0.528076	0.597446	NA	0	0	2.9953	0	0	0
AT1G07750	320.431	-0.382932	0.443326	-0.863772	0.387713	0.652172	439.819	325.64	322.893	384.837	117.895	331.5
AT1G07760	0	NA	NA	NA	NA	NA	0	0	0	0	0	0
AT1G07770	425.03	-1.15474	0.308809	-3.73932	0.00018452	0.00232854	619.004	609.509	531.365	236.203	334.037	220.059
AT1G07780	20.1486	0.0462096	1.07246	0.0430873	0.965632	0.984961	20.362	20.459	18.5708	11.5221	10.4796	39.4978
AT1G07790	195.438	0.0400729	0.553486	0.072401	0.942283	0.976485	276.923	138.098	163.543	359.489	86.4567	148.117
AT1G07795	0.142077	-0.176531	4.08047	-0.0432623	0.965492	NA	0	0.852459	0	0	0	0
AT1G07800.1	0	NA	NA	NA	NA	NA	0	0	0	0	0	0
AT1G07810	309.984	-0.235998	0.345098	-0.683858	0.494065	0.737703	390.135	339.279	276.765	332.988	217.452	303.287
AT1G07820	708.865	0.229097	0.340557	0.672713	0.50113	0.741902	475.656	629.115	853.06	964.398	485.991	844.972
AT1G07830	187.407	-0.336393	0.411541	-0.817398	0.413701	0.673162	153.122	258.295	216.26	193.571	166.364	136.832
AT1G07840	335.225	-0.269469	0.363343	-0.741639	0.458306	0.70947	465.882	303.476	330.082	273.073	406.084	232.755
AT1G07850	13.1849	0.25634	1.6062	0.159594	0.873201	0.947686	0	16.1967	19.7689	5.76104	9.16965	28.2127
AT1G07860	1.10487	1.55697	3.91828	0.39736	0.691102	NA	0	1.70492	0	2.30442	2.6199	0
AT1G07870	1077.67	0.950999	0.303141	3.13716	0.00170596	0.0142598	493.574	947.935	763.201	1790.53	1182.88	1287.91
AT1G07880	17.5021	0.0600122	1.54367	0.0388763	0.968989	0.986785	4.88687	17.0492	29.3539	5.76104	0	47.9617
AT1G07885	0	NA	NA	NA	NA	NA	0	0	0	0	0	0
AT1G07890	11093	0.264201	0.191961	1.37633	0.168721	0.400739	9157.19	9734.23	11348.6	13453.2	10997	11867.7
AT1G07900	658.403	1.36267	0.418202	3.25841	0.00112039	0.0102273	201.991	396.394	507.403	1109.58	1266.72	468.332
AT1G07901	65.5778	0.875338	0.700616	1.24938	0.211525	0.459782	52.9411	22.1639	63.5003	56.4582	134.925	63.4787
AT1G07910	123.45	0.0108337	0.477301	0.0226978	0.981891	0.993041	152.308	114.23	102.439	122.134	93.0064	156.581
AT1G07920	2640.71	-1.23593	0.285525	-4.32864	1.5e-05	0.000283827	4930.04	2991.28	3201.37	1982.95	1093.81	1644.8
AT1G07930	1412.94	-0.797409	0.254665	-3.13121	0.00174085	0.0144852	2286.24	1518.23	1577.32	1176.4	905.175	1014.25
AT1G07940	1370.15	-1.13377	0.249524	-4.54372	5.53e-06	0.000119877	2137.19	1696.39	1813.35	844.569	679.864	1049.51
AT1G07950	89.2055	-0.199684	0.588516	-0.339301	0.734383	0.885182	122.986	92.9181	70.0899	43.7839	98.2462	107.208
AT1G07960	469.445	0.301058	0.31796	0.946844	0.343718	0.612047	431.674	412.59	418.143	707.456	434.903	411.906
AT1G07970	98.9149	-1.58244	0.971397	-1.62904	0.103305	0.29428	244.344	117.639	83.2692	103.699	44.5383	0
AT1G07980	226.851	0.266271	0.384618	0.692301	0.488748	0.73376	211.765	161.115	245.015	312.248	210.902	220.059
AT1G07985	22.3557	0.164975	0.984593	0.167556	0.866932	0.944857	31.7647	11.082	20.368	20.7397	26.199	23.9808
AT1G07990	404.984	0.246308	0.3719	0.662296	0.507781	0.746819	545.701	284.721	281.558	531.168	445.383	341.374
AT1G08000	124.819	0.0223674	0.531159	0.0421105	0.966411	0.985531	163.71	138.098	70.0899	131.352	162.434	83.2276
AT1G08005	1.52827	4.47549	3.94409	1.13473	0.256488	NA	0	0	0	0	9.16965	0
AT1G08010	498.354	0.0792083	0.372731	0.212508	0.831711	0.929692	493.574	646.164	315.105	714.369	368.096	452.815
AT1G08030	308.726	0.564679	0.329475	1.71387	0.086552	0.261148	291.583	256.59	199.487	400.968	369.406	334.321
AT1G08032	0	NA	NA	NA	NA	NA	0	0	0	0	0	0
AT1G08035	5.64616	-4.55345	2.41498	-1.88551	0.0593616	0.203375	21.1765	1.70492	9.58494	0	0	1.41064
AT1G08040	408.272	0.466139	0.351152	1.32746	0.184357	0.423553	323.348	381.049	324.091	304.183	645.805	471.153
AT1G08050	12.9281	0.13735	1.54017	0.089179	0.92894	0.97117	14.6606	14.4918	7.78777	13.8265	0	26.8021
AT1G08060	109.996	1.57173	0.562952	2.79195	0.00523913	0.0348974	71.6742	69.0492	25.7595	139.417	146.714	207.364
AT1G08065	0	NA	NA	NA	NA	NA	0	0	0	0	0	0
AT1G08070	19.7299	0.13919	1.12006	0.12427	0.901102	0.959294	25.2489	26.4262	4.79247	27.653	13.0995	21.1596
AT1G08080	0.135747	-0.176531	4.08047	-0.0432623	0.965492	NA	0.814479	0	0	0	0	0
AT1G08090	0	NA	NA	NA	NA	NA	0	0	0	0	0	0
AT1G08100	0	NA	NA	NA	NA	NA	0	0	0	0	0	0
AT1G08105.1	0	NA	NA	NA	NA	NA	0	0	0	0	0	0
AT1G08110	1352.96	-0.293959	0.212799	-1.38139	0.167159	0.398458	1471.76	1480.72	1518.02	1081.92	1274.58	1290.73
AT1G08115	6.08815	0.287972	2.00815	0.143402	0.885973	0.952781	4.0724	3.40984	8.98589	16.1309	3.92985	0
AT1G08120	0	NA	NA	NA	NA	NA	0	0	0	0	0	0
AT1G08125	205.772	-0.41557	0.358784	-1.15827	0.246753	0.504639	215.837	247.213	242.619	184.353	178.153	166.455
AT1G08130	149.024	-0.437776	0.515947	-0.848491	0.396165	0.65894	206.878	125.312	182.114	147.483	60.2577	172.098
AT1G08135	0.678733	-2.51409	3.95601	-0.635513	0.525094	NA	4.0724	0	0	0	0	0
AT1G08140	0	NA	NA	NA	NA	NA	0	0	0	0	0	0
AT1G08150	0.814479	-2.7781	3.94782	-0.703705	0.481617	NA	4.88687	0	0	0	0	0
AT1G08160	6.11276	6.47422	3.28784	1.96914	0.0489369	0.178518	0	0	0	0	0	36.6766
AT1G08165	0.998432	-3.08775	3.93993	-0.783707	0.433212	NA	0	0	5.99059	0	0	0
AT1G08170	2.17194	-4.19624	3.92219	-1.06987	0.284677	NA	13.0317	0	0	0	0	0
AT1G08180	57.1781	-0.616974	1.05254	-0.586176	0.557758	0.783431	62.7149	62.2295	82.6701	56.4582	0	78.9957
AT1G08190	1009.82	0.781829	0.342002	2.28603	0.0222522	0.103082	790.045	604.394	833.291	846.873	2008.15	976.161
AT1G08200	4389.13	0.640818	0.257854	2.4852	0.0129479	0.0696038	3171.58	3136.2	3982.54	7366.07	4237.69	4440.69
AT1G08210	185.673	0.677785	0.432303	1.56785	0.116916	0.318055	158.009	90.3607	179.718	184.353	246.271	255.325
AT1G08220	78.5352	-0.00586424	0.70014	-0.00837582	0.993317	0.997624	65.9728	132.984	37.1417	38.0229	78.597	118.494
AT1G08230	756.265	0.0693208	0.274004	0.252992	0.800274	0.917783	696.38	657.246	860.249	686.716	964.123	672.874
AT1G08240	2.3175	5.07396	3.93146	1.29061	0.196841	NA	0	0	0	0	2.6199	11.2851
AT1G08250	404.801	-0.0180067	0.309834	-0.0581171	0.953655	0.98068	441.448	369.115	411.554	475.862	310.458	420.37
AT1G08260	47.4825	0.933755	0.753909	1.23855	0.215511	0.464585	33.3936	35.8033	28.7548	48.3927	106.106	32.4447
AT1G08270	23.7322	1.21566	0.949399	1.28045	0.200385	0.444521	21.1765	12.7869	8.98589	36.8707	30.1288	32.4447
AT1G08280	44.9137	0.421313	0.841687	0.500558	0.616682	0.822142	42.3529	50.2951	22.7642	87.5678	15.7194	50.7829
AT1G08290	6.4557	0.846448	2.63203	0.321596	0.747759	0.893854	13.8461	0	0	0	6.54975	18.3383
AT1G08300	22.7997	0.266544	1.06967	0.249185	0.803218	0.918929	18.733	10.2295	32.9482	13.8265	13.0995	47.9617
AT1G08310	22.3076	-1.29947	1.33717	-0.971805	0.331148	0.598777	26.8778	52	16.1746	0	9.16965	29.6234
AT1G08315	215.265	-0.867247	0.470755	-1.84225	0.0654392	0.217389	336.38	233.574	264.784	248.877	83.8368	124.136
AT1G08320	5.27462	-2.82602	2.78133	-1.01607	0.309598	0.576145	0	2.55738	25.1605	0	3.92985	0
AT1G08340	7.54864	-4.99017	2.92547	-1.70577	0.0880516	0.264326	43.9819	0	0	0	1.30995	0
AT1G08350	97.1713	-0.0555613	0.584385	-0.0950764	0.924254	0.968876	45.6108	105.705	145.571	84.1112	106.106	95.9233
AT1G08360	1559.15	-1.05503	0.226846	-4.65085	3.31e-06	7.77e-05	2363.62	2032.26	1919.98	1142.99	860.637	1035.41
AT1G08370	529.904	-0.394949	0.296226	-1.33327	0.182444	0.420693	764.796	525.968	515.191	402.121	503.021	468.332
AT1G08380	55795.3	-0.931745	0.201521	-4.62357	3.77e-06	8.7e-05	77682.6	65789.4	76162	33168.6	46191.4	35778
AT1G08390	262.655	-0.520669	0.395747	-1.31566	0.188288	0.428911	353.484	271.082	304.322	231.594	284.259	131.189
AT1G08400	76.265	-0.238258	0.69139	-0.344607	0.73039	0.883133	109.14	74.164	64.6984	132.504	43.2283	33.8553
AT1G08410	118.718	0.12577	0.520526	0.241622	0.809073	0.921174	136.832	96.3279	107.232	79.5024	104.796	187.615
AT1G08420	100.898	0.512587	0.549856	0.932221	0.351222	0.619663	119.728	74.164	55.7125	89.8722	155.884	110.03
AT1G08430	0.950226	-3.00119	3.94197	-0.761343	0.446452	NA	5.70135	0	0	0	0	0
AT1G08440	0	NA	NA	NA	NA	NA	0	0	0	0	0	0
AT1G08450	1312.45	0.910669	0.255504	3.56421	0.000364954	0.00409236	675.203	988.001	1070.52	1515.15	1865.37	1760.48
AT1G08460	222.221	-1.03126	0.378158	-2.72706	0.0063902	0.0405875	289.14	278.754	327.685	188.962	121.825	126.957
AT1G08465	286.356	0.583417	0.435319	1.34021	0.180178	0.417189	165.339	227.607	294.138	210.854	285.569	534.631
AT1G08470	150.298	-0.209127	0.426773	-0.490019	0.624121	0.826359	153.122	138.098	192.298	167.07	127.065	124.136
AT1G08480	820.759	-0.213923	0.244723	-0.874143	0.38204	0.647336	1018.91	806.427	819.513	822.677	736.192	720.836
AT1G08490	1274.89	-0.938252	0.247726	-3.78746	0.000152197	0.00197512	2044.34	1454.3	1527.6	883.744	751.911	987.446
AT1G08500	63.2029	-0.115601	0.765051	-0.151103	0.879895	0.950441	17.9185	62.2295	116.817	57.6104	48.4681	76.1744
AT1G08510	1466.21	0.939502	0.234017	4.01467	5.95e-05	0.000905683	799.818	1154.23	1060.93	2070.52	1811.66	1900.13
AT1G08520	1722.39	-0.0396806	0.214233	-0.185221	0.853055	0.938678	1808.96	1676.79	1752.25	1504.78	1962.3	1629.29
AT1G08530	274.53	0.283418	0.320954	0.88305	0.377209	0.643239	225.611	265.115	252.204	299.574	299.978	304.698
AT1G08540	709.313	-0.878023	0.251214	-3.49513	0.000473837	0.00504891	973.302	839.673	943.518	568.039	454.552	476.795
AT1G08550	932.763	0.157573	0.253856	0.620721	0.534783	0.76783	1075.11	823.476	747.626	1073.86	986.392	890.112
AT1G08560	45.2432	0.314259	0.803354	0.391184	0.695661	0.86489	49.6832	16.1967	55.1134	74.8935	44.5383	31.034
AT1G08570	1976.14	0.184275	0.261705	0.704133	0.48135	0.728513	1879.82	1993.9	1677.37	2777.97	1507.75	2020.03
AT1G08580	303.574	0.0683104	0.358815	0.190377	0.849013	0.937155	223.167	340.984	324.69	274.226	261.99	396.389
AT1G08590	2.26214	1.19638	3.20932	0.372783	0.70931	NA	0	1.70492	2.39624	0	5.2398	4.23191
AT1G08592	0	NA	NA	NA	NA	NA	0	0	0	0	0	0
AT1G08600	140.805	0.301515	0.454786	0.662982	0.507342	0.746584	117.285	102.295	158.751	173.983	176.843	115.672
AT1G08610	90.1607	-2.45475	0.538429	-4.55909	5.14e-06	0.000113139	165.339	168.787	123.406	26.5008	30.1288	26.8021
AT1G08620	282.818	0.129487	0.385468	0.33592	0.736931	0.88682	362.443	274.492	173.727	250.029	330.107	306.108
AT1G08630	236.76	-2.56619	1.24989	-2.05313	0.0400599	0.155242	406.425	523.41	285.751	172.831	3.92985	28.2127
AT1G08640	1082.98	-0.0425557	0.265889	-0.160051	0.872841	0.947661	1152.49	1115.87	1027.99	763.914	1137.04	1300.61
AT1G08650	991.356	1.33146	0.230734	5.77055	7.9e-09	4.07e-07	522.081	641.902	527.771	1350.39	1485.48	1420.51
AT1G08660	1003.33	0.0882736	0.305116	0.289312	0.772343	0.905822	954.569	821.771	1141.21	837.655	1477.62	787.135
AT1G08670	0	NA	NA	NA	NA	NA	0	0	0	0	0	0
AT1G08680	335.779	0.7119	0.336589	2.11504	0.0344265	0.140247	204.434	326.492	233.034	398.664	476.822	375.229
AT1G08695	0.8733	3.66751	3.97188	0.923369	0.355815	NA	0	0	0	0	5.2398	0
AT1G08700	172.345	-0.807358	0.40497	-1.99362	0.0461933	0.171672	229.683	208.853	219.256	109.46	107.416	159.402
AT1G08710	292.908	0.535665	0.360697	1.48508	0.137521	0.35293	236.199	245.508	236.029	409.034	402.154	228.523
AT1G08720	333.831	1.4577	0.364275	4.00164	6.29e-05	0.000946294	118.099	247.213	169.534	525.407	489.921	452.815
AT1G08730	9.52917	0.228414	2.08595	0.109501	0.912805	0.963691	19.5475	6.81968	0	4.60883	26.199	0
AT1G08735.1	0.235106	1.74702	4.08047	0.428142	0.668548	NA	0	0	0	0	0	1.41064
AT1G08740.1	0	NA	NA	NA	NA	NA	0	0	0	0	0	0
AT1G08750	191.518	-0.224985	0.393536	-0.5717	0.567525	0.789582	247.602	157.705	213.864	180.897	157.194	191.847
AT1G08760	143.989	-0.0112867	0.465542	-0.0242442	0.980658	0.992442	145.792	161.115	127.001	190.114	90.3865	149.528
AT1G08770	491.011	-0.349807	0.40554	-0.862571	0.388374	0.652467	557.104	470.558	623.021	550.755	186.013	558.612
AT1G08780	172.438	0.175906	0.404282	0.435107	0.663485	0.847913	148.235	173.902	163.543	142.874	222.691	183.383
AT1G08790	0	NA	NA	NA	NA	NA	0	0	0	0	0	0
AT1G08800	99.0179	0.59598	0.513271	1.16114	0.245584	0.503219	100.995	57.1148	78.4767	130.2	125.755	101.566
AT1G08810	170.463	1.31423	0.569819	2.30639	0.0210887	0.0992689	70.8597	88.6558	133.59	178.592	446.693	104.387
AT1G08820	451.792	-0.0247436	0.335298	-0.0737958	0.941173	0.976044	324.977	573.705	468.464	445.905	543.629	354.07
AT1G08830	2070.96	0.87614	0.201471	4.34873	1.37e-05	0.000261493	1310.5	1563.41	1508.43	2802.17	2706.36	2534.91
AT1G08840	291.077	0.242028	0.449017	0.539017	0.589875	0.805168	355.113	264.262	180.916	193.571	504.331	248.272
AT1G08845	157.173	-0.0744287	0.476324	-0.156256	0.875831	0.948784	215.837	130.426	137.784	209.702	151.954	97.334
AT1G08860	0	NA	NA	NA	NA	NA	0	0	0	0	0	0
AT1G08870	0	NA	NA	NA	NA	NA	0	0	0	0	0	0
AT1G08880	518.723	0.0642359	0.396446	0.162029	0.871283	0.946978	515.565	444.131	561.917	744.326	238.411	607.985
AT1G08890	896.436	1.12789	0.33274	3.38969	0.000699706	0.00696522	303.801	664.918	719.47	1372.28	1223.49	1094.65
AT1G08900	2073.28	1.11301	0.233674	4.76309	1.91e-06	4.86e-05	1084.07	1249.71	1598.29	2674.27	3225.1	2608.27
AT1G08910	841.133	1.06459	0.300697	3.54041	0.000399503	0.00440187	478.914	553.246	600.257	1190.23	1473.69	750.459
AT1G08920	1160.87	1.44051	0.375088	3.84047	0.000122799	0.00164561	290.769	962.427	622.422	2143.11	1527.4	1419.1
AT1G08930	6359.17	0.747738	0.252381	2.96273	0.00304924	0.0227737	3187.87	5739.61	5313.65	7285.41	9195.85	7432.65
AT1G08940	306.236	0.256055	0.521144	0.491333	0.623191	0.825942	147.421	328.197	361.832	391.751	492.541	115.672
AT1G08950	0.218325	1.74702	4.08047	0.428142	0.668548	NA	0	0	0	0	1.30995	0
AT1G08960	125.554	0.271212	0.475577	0.570281	0.568487	0.790006	103.439	118.492	119.213	112.916	107.416	191.847
AT1G08970	366.437	-0.178708	0.3553	-0.502978	0.61498	0.82105	288.326	426.23	452.889	447.057	255.44	328.678
AT1G08980	1422.11	0.112467	0.2171	0.51804	0.60443	0.814977	1252.67	1490.95	1356.27	1319.28	1575.87	1537.59
AT1G08985	14.238	1.06026	1.71646	0.617704	0.536771	0.768976	6.51583	12.7869	8.38683	0	56.3278	1.41064
AT1G08990	0	NA	NA	NA	NA	NA	0	0	0	0	0	0
AT1G09000	15.3954	-0.177225	1.2689	-0.139668	0.888922	0.954252	10.5882	22.1639	16.1746	5.76104	5.2398	32.4447
AT1G09010	660.548	-0.0216893	0.317197	-0.0683781	0.945485	0.977605	861.719	693.902	441.506	728.196	539.699	698.265
AT1G09020	362.373	-0.418224	0.366275	-1.14183	0.253525	0.513509	360	400.656	482.842	371.011	187.323	372.408
AT1G09026	0	NA	NA	NA	NA	NA	0	0	0	0	0	0
AT1G09030	0	NA	NA	NA	NA	NA	0	0	0	0	0	0
AT1G09040	30.1749	0.236761	0.964722	0.245419	0.806132	0.920092	44.7963	10.2295	28.1558	48.3927	35.3686	14.1064
AT1G09050	18.7187	0.270665	1.06199	0.254866	0.798827	0.917069	19.5475	17.0492	14.3774	31.1096	10.4796	19.7489
AT1G09060	256.847	0.675211	0.356375	1.89466	0.0581369	0.200704	202.805	228.459	162.345	291.509	275.089	380.872
AT1G09070	17153.5	0.235584	0.196743	1.19742	0.231143	0.484984	13032.5	17980.1	16255.5	18174.9	17633.2	19844.8
AT1G09080	175.811	1.28035	0.444942	2.87758	0.00400744	0.0283469	82.2624	139.803	85.6654	179.744	252.82	314.572
AT1G09090	1.66061	-3.8077	3.92694	-0.969634	0.332229	NA	5.70135	4.2623	0	0	0	0
AT1G09100	111.841	-0.723612	0.569641	-1.2703	0.203979	0.449348	133.575	94.623	189.303	56.4582	60.2577	136.832
AT1G09110	0	NA	NA	NA	NA	NA	0	0	0	0	0	0
AT1G09130	1356.62	-1.14492	0.228383	-5.01314	5.35e-07	1.57e-05	2147.78	1594.95	1862.47	909.092	784.66	840.74
AT1G09140	3793.11	0.260993	0.199032	1.31131	0.189752	0.430979	3755.56	3356.13	3240.91	3764.26	3924.61	4717.17
AT1G09150	386.969	-0.676607	0.336738	-2.0093	0.0445056	0.16716	343.71	551.541	532.563	250.029	284.259	359.712
AT1G09155	1.88085	4.77138	3.9372	1.21187	0.225561	NA	0	0	0	0	0	11.2851
AT1G09157	62.0914	1.40589	0.723865	1.94219	0.0521138	0.186181	33.3936	46.0328	22.7642	42.6317	157.194	70.5319
AT1G09160	1104.1	0.588519	0.260364	2.26037	0.0237982	0.107999	702.081	804.722	1138.21	1242.08	1383.31	1354.21
AT1G09170	7.39995	-2.72573	2.44553	-1.11458	0.265032	0.527078	0	11.082	27.5567	5.76104	0	0
AT1G09176	4.55785	1.21296	2.50504	0.48421	0.628237	0.828789	0	3.40984	4.79247	0	7.8597	11.2851
AT1G09180	106.885	0.999604	0.632802	1.57965	0.114187	0.31377	25.2489	77.5738	110.826	207.397	107.416	112.851
AT1G09190	21.9252	0.230626	1.30835	0.176273	0.86008	0.941753	0.814479	25.5738	34.1464	39.1751	26.199	5.64255
AT1G09195	96.6027	0.57132	0.551715	1.03553	0.300419	0.56576	96.1085	92.9181	44.3304	99.0899	106.106	141.064
AT1G09200	241.661	-0.0417206	0.470755	-0.0886247	0.92938	0.971265	189.774	183.279	362.431	375.62	161.124	177.74
AT1G09210	744.913	-0.309433	0.256145	-1.20804	0.227032	0.479104	978.189	742.492	753.017	659.063	723.092	613.627
AT1G09220	25.9809	0.048107	1.38939	0.0346246	0.972379	0.988337	18.733	0.852459	56.9106	2.30442	61.5676	15.517
AT1G09230	741.362	0.520505	0.295648	1.76055	0.0783138	0.244845	566.063	733.968	527.172	631.41	1075.47	914.093
AT1G09240	26.4596	-2.09536	1.49107	-1.40528	0.159939	0.387675	25.2489	65.6394	37.7407	0	30.1288	0
AT1G09245	0	NA	NA	NA	NA	NA	0	0	0	0	0	0
AT1G09250	1196.5	0.926863	0.351731	2.63515	0.00840996	0.050027	814.479	860.132	800.343	2408.11	778.11	1517.85
AT1G09260	0	NA	NA	NA	NA	NA	0	0	0	0	0	0
AT1G09270	735.834	-0.102048	0.278352	-0.366614	0.713907	0.874169	642.624	745.05	897.989	845.721	716.542	567.076
AT1G09280	162.598	-0.709257	0.47824	-1.48306	0.138059	0.353859	175.927	234.426	195.293	144.026	162.434	63.4787
AT1G09290	132.984	-1.45535	0.711507	-2.04545	0.0408104	0.157389	245.158	150.033	189.902	124.438	79.9069	8.46382
AT1G09300	208.38	-0.532089	0.619364	-0.85909	0.390291	0.654245	213.394	371.672	154.557	259.247	216.142	35.2659
AT1G09310	23811.5	-0.381728	0.189018	-2.01953	0.0434318	0.164415	24557.4	25090.4	31182.2	21933.4	20908.1	19197.4
AT1G09320	85.2771	-0.340074	0.656888	-0.517705	0.604664	0.81511	142.534	74.164	69.4908	120.982	72.0472	32.4447
AT1G09330	635.049	-0.343599	0.337942	-1.01674	0.309277	0.575765	638.552	791.082	702.097	830.742	476.822	370.998
AT1G09340	12672.8	-1.0087	0.191164	-5.2766	1.32e-07	4.66e-06	18948.9	14967.5	16876.1	7536.59	8954.81	8753
AT1G09350	21.9545	-0.62265	1.29315	-0.4815	0.630161	0.830031	18.733	30.6885	30.552	33.414	18.3393	0
AT1G09360	1.72831	4.65938	3.93965	1.18269	0.236932	NA	0	0	0	10.3699	0	0
AT1G09370	0	NA	NA	NA	NA	NA	0	0	0	0	0	0
AT1G09380	0	NA	NA	NA	NA	NA	0	0	0	0	0	0
AT1G09390	497.882	-0.167353	0.285799	-0.585562	0.55817	0.783755	548.144	531.935	500.214	512.733	368.096	526.168
AT1G09400	42.0908	0.641786	0.781439	0.821288	0.411482	0.671136	40.724	35.8033	22.1652	28.8052	79.9069	45.1404
AT1G09410	11.0094	-0.0208202	1.52553	-0.0136478	0.989111	0.996039	8.14479	3.40984	21.5661	2.30442	5.2398	25.3915
AT1G09415	351.722	-0.369114	0.433664	-0.851153	0.394685	0.657688	519.638	216.525	452.889	193.571	442.763	284.949
AT1G09420	107.672	0.364007	0.565717	0.643445	0.519936	0.75627	140.09	43.4754	98.8447	129.047	104.796	129.779
AT1G09421	0	NA	NA	NA	NA	NA	0	0	0	0	0	0
AT1G09430	1346.78	-0.479186	0.220093	-2.1772	0.0294658	0.125468	1711.22	1594.1	1400	1033.53	1227.42	1114.4
AT1G09440	97.0453	-0.0837366	0.572366	-0.146299	0.883685	0.952185	122.172	82.6886	94.6513	58.7626	150.644	73.3531
AT1G09450	0.939128	1.2251	3.93617	0.311242	0.755616	NA	0	1.70492	0	0	3.92985	0
AT1G09460	20.0139	-1.22877	1.81945	-0.675353	NA	NA	4.0724	80.1312	0	16.1309	0	19.7489
AT1G09470	0.284153	-1.24166	4.02452	-0.308523	0.757685	NA	0	1.70492	0	0	0	0
AT1G09480	49.0719	2.41131	1.03257	2.33526	0.0195301	0.0937518	17.1041	27.2787	2.39624	47.2405	17.0293	183.383
AT1G09483	3.62432	2.52136	2.73844	0.920729	0.357192	NA	3.25792	0	0	9.21766	7.8597	1.41064
AT1G09486	55.9267	0.29168	0.729493	0.39984	0.689275	0.861964	31.7647	46.0328	73.0852	92.1766	62.8776	29.6234
AT1G09490	1227.39	0.447985	0.229651	1.95072	0.0510907	0.184029	1059.64	1026.36	1028.58	1189.08	1418.68	1641.98
AT1G09500	361.749	-0.363291	0.466854	-0.778169	0.43647	0.692352	591.312	236.984	392.384	188.962	231.861	528.989
AT1G09510	13.7386	0.75576	1.37786	0.548502	0.583347	0.800597	1.62896	8.52459	20.368	5.76104	23.5791	22.5702
AT1G09520	382.818	-0.102165	0.319697	-0.319567	0.749296	0.894481	399.095	323.935	466.068	445.905	326.177	335.732
AT1G09530	476.106	0.119881	0.317678	0.377366	0.705902	0.870026	474.027	475.672	419.94	639.475	499.091	348.427
AT1G09540	0	NA	NA	NA	NA	NA	0	0	0	0	0	0
AT1G09550	0	NA	NA	NA	NA	NA	0	0	0	0	0	0
AT1G09560	1178.56	-0.167833	0.280739	-0.597826	0.549956	0.778392	1534.48	1205.38	1001.03	804.241	1232.66	1293.55
AT1G09570	648.384	-0.17644	0.302456	-0.583358	0.559652	0.78505	544.886	853.312	665.555	559.973	497.781	768.797
AT1G09575	617.035	-0.353016	0.304133	-1.16073	0.245753	0.503462	645.067	764.656	666.753	594.539	366.786	664.41
AT1G09580	75.7235	-1.90071	0.976739	-1.94597	0.0516582	0.185145	52.1267	132.131	174.326	56.4582	39.2985	0
AT1G09590	1375.18	-0.971373	0.215169	-4.51446	6.35e-06	0.000134821	1839.09	1973.44	1652.2	997.812	882.906	905.629
AT1G09600	2.43614	-0.836708	3.81529	-0.219304	0.826413	NA	0	9.37705	0	0	5.2398	0
AT1G09610	10.8895	-1.53452	2.08374	-0.736426	0.461471	0.712209	38.2805	10.2295	0	0	1.30995	15.517
AT1G09620	507.006	-1.26889	0.300528	-4.22221	2.42e-05	0.000424525	684.977	749.312	715.876	358.337	216.142	317.393
AT1G09625	0.135747	-0.176531	4.08047	-0.0432623	0.965492	NA	0.814479	0	0	0	0	0
AT1G09630	152.524	-0.275397	0.544322	-0.505945	0.612895	0.819855	179.185	86.0984	235.43	124.438	81.2169	208.774
AT1G09640	700.242	-0.942844	0.321131	-2.93601	0.00332462	0.0244673	1009.95	882.296	871.631	574.952	284.259	578.361
AT1G09645	333.693	0.590794	0.333372	1.77218	0.0763652	0.240921	217.466	277.049	304.322	474.71	320.938	407.674
AT1G09650	7.38043	0.706499	2.88275	0.245078	0.806396	0.92019	0	0	16.7737	0	27.5089	0
AT1G09660	550.655	-0.403738	0.335726	-1.20258	0.229139	0.481844	785.158	499.541	596.663	336.445	643.185	442.94
AT1G09665	0	NA	NA	NA	NA	NA	0	0	0	0	0	0
AT1G09680	19.7363	-0.405395	1.40092	-0.289377	0.772293	0.905816	7.33031	18.7541	41.3351	24.1964	0	26.8021
AT1G09690	3661.35	-1.41359	0.245763	-5.75186	8.83e-09	4.46e-07	5879.72	4971.54	5120.76	1538.2	2657.89	1799.97
AT1G09700	107.118	-0.406014	0.670315	-0.605706	0.54471	0.774132	48.0543	169.639	148.567	70.2847	162.434	43.7297
AT1G09710	95.7253	0.722001	0.572874	1.26031	0.207556	0.454393	76.561	76.7214	63.5003	120.982	60.2577	176.33
AT1G09720	2.57918	-4.44447	3.91975	-1.13386	0.256852	NA	15.4751	0	0	0	0	0
AT1G09730	384.597	0.323882	0.307216	1.05425	0.29177	0.557227	328.235	326.492	370.218	490.841	453.243	338.553
AT1G09740	160.358	-1.8511	0.46345	-3.99417	6.49e-05	0.000970835	345.339	232.721	175.524	73.7413	81.2169	53.6042
AT1G09750	322.741	-1.03671	0.355798	-2.91375	0.00357112	0.0259399	409.683	425.377	467.266	262.703	233.171	138.242
AT1G09760	322.363	-0.171967	0.341137	-0.504098	0.614192	0.820625	405.611	327.344	291.742	248.877	379.885	280.717
AT1G09770	710.465	-0.266176	0.297059	-0.896038	0.370232	0.637307	984.705	624.853	718.272	697.086	742.741	495.134
AT1G09780	596.658	-0.37257	0.322737	-1.15441	0.248333	0.506736	863.348	565.181	591.87	690.173	398.225	471.153
AT1G09790	0	NA	NA	NA	NA	NA	0	0	0	0	0	0
AT1G09794	46.5605	0.861033	0.781398	1.10191	0.270499	0.533053	36.6516	14.4918	47.9247	82.959	36.6786	60.6574
AT1G09795	662.335	-0.181943	0.309818	-0.587258	0.557031	0.783174	731.402	634.23	747.027	873.374	488.611	499.366
AT1G09800	101.242	-0.122681	0.597466	-0.205336	0.83731	0.932692	92.0361	80.9837	143.175	43.7839	102.176	145.296
AT1G09810	123.535	1.07654	0.547964	1.96462	0.0494584	0.179855	57.0135	127.869	53.9153	228.137	120.515	153.759
AT1G09812	0	NA	NA	NA	NA	NA	0	0	0	0	0	0
AT1G09815	177.403	0.561145	0.547082	1.02571	0.30503	0.571055	46.4253	162.82	220.454	209.702	233.171	191.847
AT1G09820	26.3924	-1.1526	1.02236	-1.12739	0.259577	0.520966	37.466	50.2951	21.5661	25.3486	3.92985	19.7489
AT1G09830	145.435	-1.59249	0.512967	-3.10446	0.00190626	0.0156036	149.05	265.115	240.822	39.1751	100.866	77.585
AT1G09840	657.344	0.154456	0.30405	0.507995	0.611457	0.819183	509.049	645.312	711.682	505.819	889.456	682.748
AT1G09850	251.02	-0.00692987	0.364249	-0.0190251	0.984821	0.994021	224.796	252.328	277.963	319.162	235.791	196.079
AT1G09860	13.835	0.584616	1.89193	0.309005	0.757318	0.898461	17.1041	11.9344	4.19341	0	49.7781	0
AT1G09870	779.326	0.661792	0.317534	2.08416	0.0371458	0.14779	442.262	820.918	548.139	1111.88	706.063	1046.69
AT1G09880	16.41	-1.30103	1.24006	-1.04917	0.294102	0.559653	10.5882	46.8853	12.5802	10.3699	3.92985	14.1064
AT1G09890	8.19593	-2.21003	2.13404	-1.03561	0.300385	0.565748	27.6923	12.7869	0	3.45662	5.2398	0
AT1G09900	60.8959	-1.4965	0.693977	-2.15641	0.0310519	0.130115	95.294	67.3443	107.232	47.2405	14.4094	33.8553
AT1G09910	213.491	-0.178289	0.361205	-0.493595	0.621592	0.824588	249.231	189.246	241.421	203.941	192.563	204.542
AT1G09920	525.913	0.371963	0.286704	1.29738	0.194501	0.436701	431.674	462.885	481.044	715.521	467.652	596.699
AT1G09930	30.7687	-0.252256	0.859512	-0.293487	0.76915	0.903973	22.8054	45.1804	32.3492	19.5875	39.2985	25.3915
AT1G09932	373.164	1.22877	0.435785	2.81968	0.00480714	0.0326665	127.059	264.262	277.963	525.407	288.189	756.101
AT1G09935	2.6199	5.25344	3.92858	1.33724	0.181145	NA	0	0	0	0	15.7194	0
AT1G09940	2493.95	0.78623	0.304304	2.5837	0.00977472	0.0563095	1018.1	2484.07	1990.07	3582.21	2828.18	3061.08
AT1G09950	2741.97	0.789195	0.327144	2.41238	0.0158488	0.0807401	1479.91	2191.67	2359.09	5343.94	2106.4	2970.8
AT1G09960	26.7108	0.152889	1.28652	0.11884	0.905402	0.961178	28.5068	24.7213	22.7642	64.5237	0	19.7489
AT1G09970	5224.37	0.636804	0.269595	2.36207	0.0181731	0.0892192	3086.88	5049.97	4132.91	8574.73	4979.12	5522.64
AT1G09980	486.195	0.80917	0.302868	2.67169	0.00754703	0.0460602	391.764	347.803	320.497	523.102	795.139	538.863
AT1G09995	321.824	1.1023	0.348743	3.16079	0.00157342	0.0134536	219.095	157.705	236.628	549.603	360.236	407.674
AT1G10000	123.748	-0.874281	0.49663	-1.76043	0.0783352	0.244872	132.76	161.115	186.307	58.7626	123.135	80.4063
AT1G10010	3.80405	0.757827	3.07223	0.24667	0.805164	NA	0	8.52459	0	10.3699	3.92985	0
AT1G10020	634.29	-0.499187	0.308339	-1.61895	0.105458	0.298207	490.316	876.328	862.046	511.58	581.618	483.849
AT1G10030	133.137	-0.560392	0.442839	-1.26545	0.20571	0.451677	127.059	166.23	182.713	118.677	96.9363	107.208
AT1G10040	50.8275	0.267335	0.745001	0.358839	0.719716	0.877067	52.9411	49.4427	35.9435	39.1751	30.1288	97.334
AT1G10050	125.992	0.423188	0.534655	0.791515	0.428644	0.685603	108.326	79.2787	135.387	206.245	151.954	74.7638
AT1G10060	44.1107	-1.80214	0.940878	-1.91538	0.0554435	0.194547	124.615	25.5738	55.7125	32.2618	22.2691	4.23191
AT1G10070	352.107	-1.04095	0.499924	-2.08222	0.037322	0.148198	524.525	641.902	255.798	362.946	89.0766	238.398
AT1G10090	980.173	0.927771	0.4138	2.24208	0.0249563	0.111438	540.814	884	602.054	2218	571.138	1065.03
AT1G10095	268.202	2.46899	0.498857	4.94929	7.45e-07	2.1e-05	102.624	74.164	69.4908	220.072	822.648	320.215
AT1G10100	0.568306	-2.25225	3.96572	-0.56793	0.570082	NA	0	3.40984	0	0	0	0
AT1G10110	8.17005	2.33811	2.08049	1.12382	0.261087	0.522678	0	5.11476	2.9953	26.5008	14.4094	0
AT1G10120	189.6	0.379635	0.40089	0.946981	0.343648	0.612011	131.131	163.672	199.487	231.594	241.031	170.687
AT1G10130	698.281	0.600074	0.317992	1.88707	0.0591503	0.202859	460.181	670.033	535.559	937.897	1040.1	545.917
AT1G10140	635.601	-0.219425	0.316056	-0.69426	0.487519	0.733173	650.769	872.066	528.969	614.127	429.663	718.014
AT1G10150	482.734	-0.0178125	0.301853	-0.0590106	0.952944	0.980496	510.678	494.427	451.69	376.772	450.623	612.216
AT1G10155	40.7227	3.03955	1.08997	2.78864	0.00529299	0.0351982	0.814479	13.6394	11.9812	35.7185	162.434	19.7489
AT1G10160.1	176.287	1.4808	0.3937	3.76123	0.000169077	0.00216349	101.81	84.3935	92.8541	279.987	284.259	214.417
AT1G10170	308.307	-0.731723	0.416024	-1.75885	0.0786034	0.245432	369.773	472.263	313.308	364.098	179.463	150.938
AT1G10180	107.528	-0.946206	0.561027	-1.68656	0.0916879	0.271722	184.887	140.656	99.4438	77.1979	103.486	39.4978
AT1G10190	0	NA	NA	NA	NA	NA	0	0	0	0	0	0
AT1G10200	950.379	0.137355	0.28002	0.490518	0.623767	0.826199	832.398	803.869	1078.31	717.826	1099.05	1170.83
AT1G10210	82.3613	-0.559017	0.549292	-1.0177	0.308818	0.575432	118.914	69.9017	105.434	61.067	65.4975	73.3531
AT1G10220	8.4028	-1.93421	2.02972	-0.952946	0.340617	0.608876	17.1041	4.2623	18.5708	0	10.4796	0
AT1G10230	87.9724	1.1237	0.607824	1.84873	0.0644964	0.215117	27.6923	72.4591	65.8965	168.222	87.7666	105.798
AT1G10240	74.684	0.834004	0.646417	1.29019	0.196983	0.439907	61.0859	35.8033	64.0993	99.0899	141.475	46.551
AT1G10250	0	NA	NA	NA	NA	NA	0	0	0	0	0	0
AT1G10260.1	0.427141	2.63683	4.03863	0.652903	0.513819	NA	0	0	0	1.15221	0	1.41064
AT1G10270	31.0856	0.462438	1.29435	0.357274	0.720887	0.877526	0	44.3279	34.1464	66.8281	14.4094	26.8021
AT1G10280	94.2335	0.865897	0.617803	1.40157	0.161042	0.389364	80.6334	34.9508	84.4673	108.308	69.4273	187.615
AT1G10290	632.654	0.297871	0.274237	1.08618	0.277399	0.541378	546.515	699.017	457.681	685.564	706.063	701.087
AT1G10300	0.335433	-1.51663	4.00438	-0.378742	0.704879	NA	0.814479	0	1.19812	0	0	0
AT1G10310	515.917	-0.98282	0.326975	-3.0058	0.00264885	0.020459	710.226	734.82	610.441	276.53	491.231	272.253
AT1G10320	443.676	1.30267	0.464851	2.80233	0.0050735	0.0340285	423.529	233.574	111.425	736.261	782.04	375.229
AT1G10330	11.8033	-0.496105	1.68933	-0.293669	0.769011	0.903871	9.77375	1.70492	29.953	14.9787	14.4094	0
AT1G10340	100.485	0.111676	0.547537	0.203961	0.838384	0.932784	146.606	80.9837	62.3021	88.72	110.036	114.262
AT1G10350	238.106	-0.101041	0.526092	-0.19206	0.847695	0.936517	305.43	233.574	200.086	170.527	93.0064	426.012
AT1G10360	824.432	-0.210158	0.251681	-0.835015	0.403709	0.664856	892.669	751.017	1008.82	676.346	829.198	788.546
AT1G10370	1787.32	0.4238	0.30299	1.39873	0.161895	0.390703	1838.28	1265.05	1477.28	3007.26	1447.49	1688.53
AT1G10380	19.6853	-0.542908	1.40533	-0.386321	0.699259	0.867083	41.5384	5.11476	23.3633	3.45662	43.2283	1.41064
AT1G10385	0	NA	NA	NA	NA	NA	0	0	0	0	0	0
AT1G10390	398.401	0.23211	0.319616	0.726215	0.467707	0.717781	348.597	427.082	323.492	324.923	476.822	489.491
AT1G10400	19.5306	-0.854879	1.347	-0.634656	0.525653	0.760967	30.1357	17.9016	27.5567	31.1096	10.4796	0
AT1G10410	408.956	-0.297119	0.471203	-0.630554	0.528332	0.762915	499.276	449.246	404.964	686.716	254.13	159.402
AT1G10417	50.8132	-0.672518	0.746398	-0.901019	0.367578	0.635293	59.457	52.8525	74.8824	18.4353	66.8074	32.4447
AT1G10419	0	NA	NA	NA	NA	NA	0	0	0	0	0	0
AT1G10430	449.245	0.183257	0.277894	0.659447	0.509609	0.748224	402.353	401.508	458.28	481.623	520.05	431.655
AT1G10440	0	NA	NA	NA	NA	NA	0	0	0	0	0	0
AT1G10450	71.7806	1.46854	0.683436	2.14877	0.0316529	0.131961	20.362	26.4262	67.0946	87.5678	82.5268	146.706
AT1G10455	0	NA	NA	NA	NA	NA	0	0	0	0	0	0
AT1G10460	6.04122	-3.04102	2.7219	-1.11724	0.263892	0.525591	1.62896	30.6885	0	0	3.92985	0
AT1G10470	1417.37	-0.412852	0.243536	-1.69524	0.0900293	0.268349	1229.05	1714.3	1912.8	1252.45	1224.8	1170.83
AT1G10480	0.542986	-2.19073	3.96827	-0.552062	0.580906	NA	3.25792	0	0	0	0	0
AT1G10490	61.9266	-0.938184	0.726033	-1.29221	0.196286	0.438934	102.624	103.148	38.3398	20.7397	61.5676	45.1404
AT1G10500	298.319	-0.64393	0.359134	-1.79301	0.0729714	0.233286	334.751	318.82	437.912	292.661	171.603	234.166
AT1G10510	296.683	-0.363891	0.350623	-1.03784	0.299344	0.564948	399.095	364	239.025	267.312	275.089	235.576
AT1G10520	9.09086	-1.47978	2.33504	-0.633726	0.52626	0.761233	0	22.1639	17.9718	0	14.4094	0
AT1G10522	291.651	-0.634477	0.424637	-1.49416	0.135133	0.349609	371.402	415.148	277.963	185.506	360.236	139.653
AT1G10530	31.5745	0.851225	1.04462	0.814864	0.41515	0.674481	13.8461	11.082	42.5332	59.9148	55.0179	7.05319
AT1G10538	0	NA	NA	NA	NA	NA	0	0	0	0	0	0
AT1G10540	7.63878	4.7976	2.42773	1.97617	0.0481357	0.176448	1.62896	0	0	23.0442	0	21.1596
AT1G10550	163.566	-0.848666	0.577975	-1.46834	0.142011	0.360227	168.597	260.853	201.883	148.635	168.983	32.4447
AT1G10560	1081.23	1.59262	0.377947	4.21385	2.51e-05	0.000438284	315.203	570.295	729.654	2488.77	1364.97	1018.48
AT1G10570	898.294	0.443673	0.316037	1.40386	0.160359	0.38832	1099.55	562.623	621.823	963.246	1251	891.523
AT1G10580	498.204	0.0228478	0.30867	0.0740201	0.940994	0.976044	477.285	472.263	533.163	458.579	662.834	385.104
AT1G10585	77.8477	-1.95259	2.00756	-0.972621	NA	NA	160.452	50.2951	160.548	94.4811	1.30995	0
AT1G10586	0.542986	-2.19073	3.96827	-0.552062	0.580906	NA	3.25792	0	0	0	0	0
AT1G10588	0.825251	-1.39834	3.96151	-0.352982	0.724102	NA	2.44344	0	1.19812	0	1.30995	0
AT1G10590	2233.25	0.142878	0.20355	0.701929	0.482723	0.729613	2002.8	2047.61	2317.76	2453.05	2486.28	2091.97
AT1G10600	299.822	-0.565874	0.34737	-1.62902	0.103308	0.29428	257.375	427.935	388.19	231.594	237.101	256.736
AT1G10610	257.192	1.20176	0.372484	3.22635	0.00125379	0.0112261	179.185	135.541	152.76	270.769	466.342	338.553
AT1G10620	1.42895	0.660497	3.85518	0.171327	0.863966	NA	1.62896	1.70492	0	0	5.2398	0
AT1G10630	1346.33	-0.272942	0.246623	-1.10672	0.268417	0.530717	1369.14	1400.59	1650.41	1503.63	989.012	1165.19
AT1G10640	49.4094	-1.00714	1.18321	-0.851191	0.394663	0.657688	48.8687	33.2459	115.618	12.6743	0	86.0489
AT1G10650	337.5	0.948271	0.351256	2.69966	0.00694106	0.0431203	212.579	247.213	231.237	391.751	331.417	610.806
AT1G10652	0	NA	NA	NA	NA	NA	0	0	0	0	0	0
AT1G10657	71.7931	0.252266	0.845875	0.298231	0.765527	0.902157	23.6199	69.0492	103.637	12.6743	106.106	115.672
AT1G10660	307.319	-1.21959	0.426169	-2.86176	0.00421293	0.029519	374.66	451.804	463.073	161.309	98.2462	294.823
AT1G10670	2187.74	-0.0794549	0.208482	-0.381112	0.70312	0.868672	2235.74	2060.39	2447.16	1899.99	2384.11	2099.03
AT1G10680	0.798745	-2.76839	3.9481	-0.701196	0.483181	NA	0	0	4.79247	0	0	0
AT1G10682	29.5165	-1.41992	1.22519	-1.15893	0.246483	0.504342	63.5294	23.8689	41.3351	0	13.0995	35.2659
AT1G10690	64.4018	-0.557878	0.660715	-0.844354	0.398471	0.660467	80.6334	79.2787	70.0899	48.3927	26.199	81.817
AT1G10700	1247.84	0.278378	0.267489	1.04071	0.298012	0.563494	1153.3	1236.07	995.037	1784.77	1282.44	1035.41
AT1G10705	0	NA	NA	NA	NA	NA	0	0	0	0	0	0
AT1G10710	0.135747	-0.176531	4.08047	-0.0432623	0.965492	NA	0.814479	0	0	0	0	0
AT1G10717	0	NA	NA	NA	NA	NA	0	0	0	0	0	0
AT1G10720	606.905	0.839745	0.27175	3.09014	0.00200061	0.0162096	414.57	508.918	382.2	732.804	893.386	709.55
AT1G10730	67.6776	0.540761	0.668976	0.808342	0.418894	0.678074	58.6425	23.8689	82.6701	86.4156	64.1875	90.2808
AT1G10740	954.176	0.693344	0.256646	2.70156	0.00690144	0.0429443	648.325	639.345	899.188	1094.6	1334.84	1108.76
AT1G10745	0	NA	NA	NA	NA	NA	0	0	0	0	0	0
AT1G10747	0.998432	-3.08775	3.93993	-0.783707	0.433212	NA	0	0	5.99059	0	0	0
AT1G10750	0	NA	NA	NA	NA	NA	0	0	0	0	0	0
AT1G10760	755.566	-0.146323	0.291817	-0.50142	0.616076	0.82187	839.728	732.263	809.928	937.897	508.26	705.319
AT1G10770	0	NA	NA	NA	NA	NA	0	0	0	0	0	0
AT1G10780	11.1983	-0.105977	2.62315	-0.0404006	0.967774	0.986146	0	0	34.7454	0	0	32.4447
AT1G10790	0.8733	3.66751	3.97188	0.923369	0.355815	NA	0	0	0	0	5.2398	0
AT1G10800	0	NA	NA	NA	NA	NA	0	0	0	0	0	0
AT1G10810	38.1962	1.24158	0.843217	1.47243	0.140905	0.358505	20.362	29.8361	17.9718	28.8052	96.9363	35.2659
AT1G10820	259.73	0.00809407	0.377943	0.0214161	0.982914	0.993604	279.366	313.705	184.51	320.314	230.551	229.934
AT1G10830	458.059	-1.06314	0.331105	-3.21088	0.00132327	0.0117282	526.153	540.459	791.357	221.224	305.218	363.944
AT1G10840	746.154	-0.917424	0.260192	-3.52595	0.000421974	0.00460852	1004.25	947.082	975.268	460.883	453.243	636.197
AT1G10850	158.086	-0.696803	0.802457	-0.868337	0.38521	0.650135	125.43	157.705	303.124	5.76104	188.633	167.866
AT1G10865	391.072	-0.0795439	0.348685	-0.228126	0.819549	0.925643	288.326	542.164	375.011	344.51	337.967	458.457
AT1G10870	251.652	0.124654	0.412583	0.302132	0.762552	0.901112	214.208	315.41	192.897	197.028	375.956	214.417
AT1G10880	0	NA	NA	NA	NA	NA	0	0	0	0	0	0
AT1G10890	2767.79	0.859607	0.226152	3.80102	0.000144101	0.00188832	2129.86	1850.69	1919.98	3490.04	4358.2	2857.95
AT1G10900	753.842	0.186406	0.277168	0.672537	0.501242	0.741947	894.298	537.902	683.526	848.025	800.379	758.923
AT1G10910	437.409	-0.312053	0.30709	-1.01616	0.309552	0.576112	511.493	535.345	407.36	442.448	423.114	304.698
AT1G10920	362.218	0.401209	0.31374	1.2788	0.200969	0.445416	242.715	338.426	355.242	430.926	415.254	390.746
AT1G10930	70.3439	-0.184814	0.727493	-0.254042	0.799463	0.91748	88.7782	112.525	23.3633	61.067	43.2283	93.102
AT1G10940	1655.61	1.26236	0.213391	5.91568	3.3e-09	1.94e-07	1092.22	902.755	927.942	2534.86	2148.32	2327.55
AT1G10950	1077.1	-0.580538	0.237921	-2.44005	0.0146852	0.076378	1093.03	1319.61	1459.91	904.483	772.87	912.682
AT1G10960	3173.29	-1.64778	0.239005	-6.89435	5.41e-12	6.72e-10	5773.84	4310.89	4348.57	1552.02	1206.46	1847.93
AT1G10970	12.4421	7.50045	2.07179	3.62028	0.000294281	0.00341596	0	0	0	2.30442	49.7781	22.5702
AT1G10980	1.5596	4.50315	3.94339	1.14195	0.253475	NA	0	0	0	2.30442	0	7.05319
AT1G10990	28.9456	-1.19839	1.18282	-1.01317	0.310981	0.577437	31.7647	44.3279	44.9294	17.2831	35.3686	0
AT1G11000	425.626	0.672874	0.35726	1.88343	0.0596419	0.204092	298.099	462.885	224.048	523.102	619.606	426.012
AT1G11010	0	NA	NA	NA	NA	NA	0	0	0	0	0	0
AT1G11020	270.767	0.228015	0.403357	0.565292	0.571875	0.792421	171.041	246.361	330.681	373.315	206.972	296.234
AT1G11030	0	NA	NA	NA	NA	NA	0	0	0	0	0	0
AT1G11040	0	NA	NA	NA	NA	NA	0	0	0	0	0	0
AT1G11050	438.28	-0.250469	0.315184	-0.794676	0.426802	0.684144	393.393	441.574	593.068	353.728	365.476	482.438
AT1G11055	0	NA	NA	NA	NA	NA	0	0	0	0	0	0
AT1G11060	170.373	0.150504	0.486563	0.309321	0.757077	0.898387	231.312	122.754	130.595	228.137	103.486	205.953
AT1G11070	10.6262	0.498949	1.79533	0.277916	0.781077	0.909758	1.62896	2.55738	22.1652	13.8265	23.5791	0
AT1G11080	0.704053	-2.56415	3.95434	-0.648439	0.516701	NA	0.814479	3.40984	0	0	0	0
AT1G11090	172.283	-0.00318128	0.521016	-0.00610592	0.995128	0.998587	105.068	208.853	203.081	89.8722	154.574	272.253
AT1G11100	21.662	0.828626	1.7174	0.482489	0.629459	0.829661	37.466	9.37705	0	0	37.9885	45.1404
AT1G11110	0	NA	NA	NA	NA	NA	0	0	0	0	0	0
AT1G11112	2.84153	-4.58342	3.91856	-1.16967	0.242135	NA	0	17.0492	0	0	0	0
AT1G11120	24.9507	-0.341976	0.994778	-0.343771	0.731018	0.883414	13.0317	46.0328	24.5614	12.6743	20.9592	32.4447
AT1G11125	3.4932	5.6686	3.92313	1.44492	0.148481	NA	0	0	0	0	20.9592	0
AT1G11130	43.1453	-1.29449	0.771799	-1.67724	0.0934951	0.275144	65.1583	66.4918	52.1181	11.5221	35.3686	28.2127
AT1G11145	0	NA	NA	NA	NA	NA	0	0	0	0	0	0
AT1G11150.1	81.0061	-0.559592	0.633124	-0.883859	0.376772	0.643066	138.461	96.3279	55.1134	88.72	70.7373	36.6766
AT1G11160	11.9121	-0.791073	2.20906	-0.358104	0.720266	0.877361	0	21.3115	23.9624	0	26.199	0
AT1G11170	28.0297	0.200413	1.46972	0.136361	0.891536	0.955885	51.3122	17.9016	8.98589	0	3.92985	86.0489
AT1G11175	728.646	1.00862	0.307079	3.28458	0.00102136	0.00944839	540.814	559.213	352.247	1001.27	1194.67	723.657
AT1G11180	435.902	0.0961345	0.321093	0.299398	0.764637	0.901944	386.063	421.967	456.483	597.996	408.704	344.195
AT1G11185	40.8093	2.02756	0.865005	2.34399	0.0190789	0.0923867	5.70135	11.082	31.1511	82.959	58.9477	55.0148
AT1G11190	28.2157	-3.81177	3.75819	-1.01426	NA	NA	158.009	0	0	0	0	11.2851
AT1G11200	403.167	-0.30873	0.304312	-1.01452	0.310335	0.576503	413.755	461.181	463.073	281.139	403.464	396.389
AT1G11210	1955.22	1.38468	0.352737	3.92553	8.65e-05	0.00122841	995.293	886.558	1366.45	2828.67	4269.13	1385.25
AT1G11220	0.135747	-0.176531	4.08047	-0.0432623	0.965492	NA	0.814479	0	0	0	0	0
AT1G11230	0	NA	NA	NA	NA	NA	0	0	0	0	0	0
AT1G11240	175.603	0.136746	0.412536	0.331477	0.740284	0.889175	159.638	205.443	137.185	224.681	172.913	153.759
AT1G11250	0	NA	NA	NA	NA	NA	0	0	0	0	0	0
AT1G11260	5232.37	0.914519	0.304852	2.99988	0.00270083	0.0207728	2197.46	4784	3900.47	7016.95	4793.11	8702.22
AT1G11265.1	6.18641	3.35994	1.99703	1.68247	0.0924778	0.273092	0.814479	2.55738	0	10.3699	7.8597	15.517
AT1G11270	137.68	-0.215341	0.456039	-0.472199	0.636785	0.834158	191.403	109.115	143.175	116.373	117.895	148.117
AT1G11280	137.807	-0.417731	0.46277	-0.902675	0.366698	0.634589	177.556	150.885	144.373	88.72	163.744	101.566
AT1G11290	51.3124	-1.37028	0.694858	-1.97203	0.0486066	0.177715	87.1493	73.3115	61.7031	33.414	35.3686	16.9276
AT1G11300	302.709	0.357201	0.405482	0.880929	0.378356	0.64413	149.864	323.935	322.294	303.031	433.593	283.538
AT1G11310	3465.65	0.92366	0.228527	4.0418	5.3e-05	0.000823788	2297.65	2386.89	2492.68	3464.69	4556	5596
AT1G11320	14.2119	-0.158821	1.53171	-0.103688	0.917417	0.966035	6.51583	10.2295	28.1558	14.9787	0	25.3915
AT1G11330	336.439	1.97715	0.362752	5.45043	5.02e-08	2.07e-06	176.742	95.4755	136.585	523.102	653.665	433.066
AT1G11340	70.8583	0.96274	0.756444	1.27272	0.203118	0.448088	79.0045	29.8361	35.3445	38.0229	179.463	63.4787
AT1G11350	740.327	0.80463	0.302335	2.66139	0.00778189	0.0470372	381.991	577.968	656.569	820.372	837.058	1168.01
AT1G11360	601.585	-1.09938	0.295104	-3.72541	0.000195	0.00243635	737.104	889.968	833.291	274.226	454.552	420.37
AT1G11362	13.3041	1.50488	1.55175	0.969794	0.332149	0.599878	0	5.11476	15.5755	28.8052	9.16965	21.1596
AT1G11370	0.710383	-2.57643	3.95394	-0.65161	0.514653	NA	0	4.2623	0	0	0	0
AT1G11380	448.319	0.204274	0.320702	0.636959	0.524152	0.760212	353.484	421.967	474.455	503.515	589.477	347.017
AT1G11390	158.264	0.105996	0.53361	0.198639	0.842545	0.934058	122.986	186.689	147.968	209.702	218.762	63.4787
AT1G11400	294.789	-0.00823251	0.433955	-0.0189709	0.984864	0.994021	465.882	156.853	264.185	276.53	347.137	258.147
AT1G11410	634.425	0.985674	0.296488	3.3245	0.000885787	0.00836655	308.688	450.951	516.988	712.065	905.175	912.682
AT1G11420	0.994536	-3.06447	3.94047	-0.777692	0.436751	NA	0	5.96722	0	0	0	0
AT1G11430	1281.09	-1.27302	0.225468	-5.64613	1.64e-08	7.77e-07	1906.7	1995.61	1534.79	733.957	783.35	732.121
AT1G11440	409.178	0.520425	0.340889	1.52667	0.126844	0.33516	386.878	237.836	383.398	397.512	606.507	442.94
AT1G11450	4.49294	-5.24972	3.66198	-1.43358	0.151693	0.375281	0	0	26.9577	0	0	0
AT1G11460	2.0362	-4.10301	3.92322	-1.04583	0.295641	NA	12.2172	0	0	0	0	0
AT1G11470	1.6052	-0.534432	3.85173	-0.138751	0.889647	NA	5.70135	0	0	0	3.92985	0
AT1G11475	310.005	-0.527795	0.360852	-1.46264	0.143567	0.362984	435.746	333.312	328.883	172.831	298.668	290.591
AT1G11480	627.634	0.317164	0.25782	1.23018	0.218631	0.468598	615.746	533.64	527.771	780.045	685.104	623.502
AT1G11482	17.1314	-2.09284	1.46754	-1.42609	0.153843	0.378828	65.9728	1.70492	15.5755	2.30442	14.4094	2.82127
AT1G11490	1.89702	-4.00874	3.92432	-1.02151	0.307013	NA	0	0	11.3821	0	0	0
AT1G11500	0	NA	NA	NA	NA	NA	0	0	0	0	0	0
AT1G11510	0	NA	NA	NA	NA	NA	0	0	0	0	0	0
AT1G11520	0	NA	NA	NA	NA	NA	0	0	0	0	0	0
AT1G11530	591.48	-0.0596121	0.325103	-0.183364	0.854512	0.939238	431.674	678.558	700.3	495.449	475.512	767.387
AT1G11540	19.8251	1.21901	1.28118	0.951477	0.341362	0.609667	0.814479	5.96722	28.7548	20.7397	28.8189	33.8553
AT1G11545	327.891	-0.56396	0.504687	-1.11745	0.263804	0.525497	158.823	496.131	518.186	134.808	395.605	263.789
AT1G11550	0	NA	NA	NA	NA	NA	0	0	0	0	0	0
AT1G11560	0	NA	NA	NA	NA	NA	0	0	0	0	0	0
AT1G11570	1.34424	4.29832	3.94894	1.08847	0.276386	NA	0	0	0	8.06546	0	0
AT1G11572	2.11238	4.9479	3.93371	1.25782	0.208456	NA	0	0	0	12.6743	0	0
AT1G11580	137.641	-1.76938	0.704203	-2.51259	0.0119848	0.0657304	361.629	114.23	162.944	74.8935	100.866	11.2851
AT1G11590	2.40157	5.12787	3.93056	1.30462	0.192023	NA	0	0	0	0	14.4094	0
AT1G11592	104.052	-0.566079	0.594806	-0.951704	0.341247	0.609515	170.226	130.426	71.8871	41.4795	108.726	101.566
AT1G11593	0	NA	NA	NA	NA	NA	0	0	0	0	0	0
AT1G11595	0	NA	NA	NA	NA	NA	0	0	0	0	0	0
AT1G11600	0	NA	NA	NA	NA	NA	0	0	0	0	0	0
AT1G11608	0	NA	NA	NA	NA	NA	0	0	0	0	0	0
AT1G11610	0	NA	NA	NA	NA	NA	0	0	0	0	0	0
AT1G11620	0	NA	NA	NA	NA	NA	0	0	0	0	0	0
AT1G11630	56.5601	0.0112669	1.11739	0.0100832	0.991955	0.996958	57.828	81.8361	29.3539	51.8494	0	118.494
AT1G11640	0.235106	1.74702	4.08047	0.428142	0.668548	NA	0	0	0	0	0	1.41064
AT1G11650	2178.02	-0.886371	0.244115	-3.63096	0.000282366	0.00329858	3317.37	2715.08	2448.95	1920.73	1286.37	1379.6
AT1G11655	0.218325	1.74702	4.08047	0.428142	0.668548	NA	0	0	0	0	1.30995	0
AT1G11660	200.222	0.269182	0.431733	0.623492	0.532962	0.766465	228.869	123.607	192.298	214.311	284.259	157.991
AT1G11670	2918.4	1.21205	0.274462	4.41611	1e-05	0.000201063	1947.42	2088.53	1244.25	3039.52	5133.69	4056.99
AT1G11680	934.911	-1.06592	0.276915	-3.84927	0.000118468	0.00159607	1681.08	996.525	1118.44	558.821	616.986	637.608
AT1G11684	0	NA	NA	NA	NA	NA	0	0	0	0	0	0
AT1G11690	2.88052	5.39417	3.92656	1.37377	0.169515	NA	0	0	0	17.2831	0	0
AT1G11700	39.2522	1.12454	0.928241	1.21148	0.225712	0.477722	36.6516	25.5738	11.9812	81.8068	11.7895	67.7106
AT1G11710	6.28881	0.314617	3.01043	0.104509	0.916765	0.965855	0	0	16.7737	0	20.9592	0
AT1G11720	1003.61	0.428438	0.300264	1.42687	0.153617	0.378458	1065.34	832	670.347	1221.34	1437.01	795.599
AT1G11730	13.9005	0.465924	1.62796	0.286201	0.774724	0.906608	0	6.81968	28.1558	33.414	6.54975	8.46382
AT1G11735	0	NA	NA	NA	NA	NA	0	0	0	0	0	0
AT1G11740	36.5611	-3.57474	1.2555	-2.84728	0.0044095	0.0305523	62.7149	76.7214	62.9012	0	17.0293	0
AT1G11750	1997.61	-1.54526	0.207573	-7.4444	9.74e-14	1.87e-11	3098.28	2847.21	2982.12	1117.64	1054.51	885.88
AT1G11755	90.0683	-0.401711	0.535595	-0.750028	0.453238	0.705565	122.172	75.8689	109.628	92.1766	79.9069	60.6574
AT1G11760	155.636	-0.448439	0.437549	-1.02489	0.305416	0.571527	208.507	129.574	200.685	139.417	106.106	149.528
AT1G11765	0	NA	NA	NA	NA	NA	0	0	0	0	0	0
AT1G11770	4.13863	-1.36218	3.40702	-0.399815	0.689292	0.861964	17.9185	0	0	6.91325	0	0
AT1G11780	298.577	-0.0270007	0.390333	-0.0691734	0.944852	0.977296	259.004	362.295	282.756	301.879	182.083	403.442
AT1G11785	6.96959	1.89867	1.71747	1.10551	0.26894	0.531486	0.814479	2.55738	5.39153	8.06546	5.2398	19.7489
AT1G11790	668.179	-0.0936285	0.301335	-0.310712	0.75602	0.897926	650.769	720.328	699.102	892.961	542.319	503.597
AT1G11800	85.3719	0.314171	0.667155	0.470911	0.637704	0.834305	52.1267	91.2132	85.0664	145.178	31.4388	107.208
AT1G11803	0.576104	3.08434	4.0039	0.770333	0.441103	NA	0	0	0	3.45662	0	0
AT1G11806	2.58617	5.232	3.9289	1.33167	0.182969	NA	0	0	0	0	0	15.517
AT1G11810	0	NA	NA	NA	NA	NA	0	0	0	0	0	0
AT1G11820	253.687	-0.721557	0.35864	-2.01192	0.0442279	0.166614	329.864	297.508	320.497	246.573	159.814	167.866
AT1G11840	3063.59	-0.162317	0.218539	-0.742735	0.457642	0.709007	3892.4	2615.35	3199.57	2958.87	2961.8	2753.56
AT1G11850	9.23729	-0.711274	1.72136	-0.413205	0.679456	0.855967	4.0724	9.37705	20.9671	9.21766	11.7895	0
AT1G11860	10391.2	-0.916321	0.199407	-4.59524	4.32e-06	9.76e-05	15174.6	11586.6	13992.2	6612.52	8123	6858.52
AT1G11870	268.04	-0.446587	0.374438	-1.19269	0.232992	0.487338	307.059	264.262	355.841	207.397	168.983	304.698
AT1G11880	92.8548	0.537533	0.54998	0.977368	0.328387	0.59566	52.9411	103.148	71.288	131.352	79.9069	118.494
AT1G11890	866.07	0.25277	0.23072	1.09557	0.273265	0.536141	719.185	822.623	829.098	896.418	944.474	984.625
AT1G11900	70.5381	-0.491109	0.676351	-0.726116	0.467767	0.717781	96.1085	80.9837	70.0899	24.1964	98.2462	53.6042
AT1G11905	132.525	-0.205583	0.533304	-0.385489	0.699875	0.867304	118.914	75.8689	230.638	109.46	119.205	141.064
AT1G11910	2352.34	-0.216576	0.214159	-1.01129	0.311878	0.57832	2811.58	2253.9	2519.64	1870.03	2245.25	2413.6
AT1G11915	0	NA	NA	NA	NA	NA	0	0	0	0	0	0
AT1G11920	0	NA	NA	NA	NA	NA	0	0	0	0	0	0
AT1G11925	0	NA	NA	NA	NA	NA	0	0	0	0	0	0
AT1G11930	1252.13	0.20996	0.248369	0.845355	0.397913	0.660078	1370.77	1074.95	1038.17	1307.76	1596.83	1124.28
AT1G11940	117.223	0.0506002	0.635857	0.0795779	0.936573	0.973978	36.6516	123.607	185.109	131.352	153.264	73.3531
AT1G11950	78.1169	2.17439	0.627364	3.46592	0.000528418	0.00553094	14.6606	28.1312	41.9341	155.548	93.0064	135.421
AT1G11960	2505.95	1.57769	0.318989	4.94591	7.58e-07	2.13e-05	878.823	1640.13	1254.43	4827.75	2212.5	4222.04
AT1G11970	0	NA	NA	NA	NA	NA	0	0	0	0	0	0
AT1G11980	0	NA	NA	NA	NA	NA	0	0	0	0	0	0
AT1G11990	81.3146	-0.0961502	0.784701	-0.122531	0.902478	0.95981	108.326	115.082	28.7548	80.6546	19.6492	135.421
AT1G12000	649.078	-0.589199	0.271461	-2.17047	0.0299709	0.126866	756.651	906.164	676.937	496.602	603.887	454.225
AT1G12010	14.6695	-6.9537	2.2617	-3.07455	0.00210821	0.0168925	70.0452	0	17.9718	0	0	0
AT1G12013	0	NA	NA	NA	NA	NA	0	0	0	0	0	0
AT1G12015	0	NA	NA	NA	NA	NA	0	0	0	0	0	0
AT1G12020	60.4165	-0.248799	0.842984	-0.295141	0.767886	0.903438	91.2217	93.7705	11.9812	57.6104	27.5089	80.4063
AT1G12030	10.6314	0.044911	2.08034	0.0215883	0.982776	0.993537	1.62896	29.8361	0	12.6743	19.6492	0
AT1G12040	0.542986	-2.19073	3.96827	-0.552062	0.580906	NA	3.25792	0	0	0	0	0
AT1G12050	403.64	-0.825085	0.332184	-2.48382	0.0129981	0.0697854	526.153	418.558	602.653	210.854	322.248	341.374
AT1G12060	80.26	-1.87725	0.722463	-2.59841	0.00936571	0.0545073	131.131	108.262	139.581	69.1325	23.5791	9.87446
AT1G12064	0	NA	NA	NA	NA	NA	0	0	0	0	0	0
AT1G12070	0.135747	-0.176531	4.08047	-0.0432623	0.965492	NA	0.814479	0	0	0	0	0
AT1G12080	540.842	0.600362	0.485279	1.23715	0.216032	0.465254	180	570.295	539.153	668.281	282.949	1004.37
AT1G12090	11300.9	-1.12637	0.264915	-4.25181	2.12e-05	0.000377716	10739.7	16066.3	19697.1	6035.27	9088.43	6178.59
AT1G12100	5.55657	-5.5555	2.94279	-1.88783	0.0590482	0.202612	0	9.37705	23.9624	0	0	0
AT1G12110	267.859	-1.09182	0.47428	-2.30205	0.0213324	0.100065	250.86	375.082	467.266	86.4156	145.404	282.127
AT1G12120	648.766	-0.381955	0.248842	-1.53493	0.124801	0.33185	780.271	768.918	653.573	576.104	559.348	554.38
AT1G12130	1.27267	1.10184	3.87708	0.284194	0.776262	NA	0	0	2.39624	0	5.2398	0
AT1G12140	351.365	0.0229543	0.331901	0.06916	0.944862	0.977296	412.941	336.721	296.534	441.296	293.429	327.268
AT1G12150	59.1396	1.09072	0.628069	1.73662	0.0824544	0.25262	48.0543	28.1312	37.1417	73.7413	74.6671	93.102
AT1G12160	1.66773	4.60381	3.94093	1.1682	0.242724	NA	0	0	0	3.45662	6.54975	0
AT1G12170	0	NA	NA	NA	NA	NA	0	0	0	0	0	0
AT1G12180	0	NA	NA	NA	NA	NA	0	0	0	0	0	0
AT1G12190	0	NA	NA	NA	NA	NA	0	0	0	0	0	0
AT1G12200	14.6922	0.648097	1.25737	0.515438	0.606247	0.815979	18.733	5.96722	9.58494	6.91325	13.0995	33.8553
AT1G12210	13.4362	0.0165701	1.24176	0.0133441	0.989353	0.996114	17.9185	16.1967	5.99059	8.06546	18.3393	14.1064
AT1G12211	0.844314	1.32284	3.9613	0.333941	0.738424	NA	0	0.852459	0.599059	2.30442	1.30995	0
AT1G12220	133.096	0.515461	0.581243	0.886827	0.375172	0.641353	79.8189	127.869	121.01	207.397	53.7079	208.774
AT1G12230	1043.42	-0.420244	0.240703	-1.7459	0.0808279	0.249717	1259.18	1288.07	1035.77	776.588	1017.83	883.059
AT1G12240	2869.94	1.29161	0.315739	4.09077	4.3e-05	0.000692326	1413.94	1818.3	1761.83	5149.22	2084.13	4992.24
AT1G12244	349.305	-0.550245	0.394475	-1.39488	0.163053	0.392435	411.312	388.722	445.7	343.358	362.856	143.885
AT1G12250	1223.04	0.118754	0.253512	0.468434	0.639474	0.835129	1441.63	1007.61	1068.72	1070.4	1295.54	1454.37
AT1G12260	7.71744	-0.894163	2.59996	-0.343914	0.730911	0.883378	29.3212	0.852459	0	16.1309	0	0
AT1G12270	442.728	-0.448142	0.407336	-1.10018	0.271254	0.534092	480.543	557.509	494.823	277.682	631.396	214.417
AT1G12280	58.5647	0.0107447	0.679429	0.0158143	0.987383	0.995392	31.7647	68.1968	74.8824	42.6317	56.3278	77.585
AT1G12290	91.4846	1.54671	0.602524	2.56705	0.0102567	0.0585164	26.0633	34.9508	78.4767	111.764	146.714	150.938
AT1G12294	0	NA	NA	NA	NA	NA	0	0	0	0	0	0
AT1G12300	40.5843	-1.27602	0.890491	-1.43294	0.151876	0.375593	75.7466	65.6394	31.1511	29.9574	35.3686	5.64255
AT1G12310	683.111	-0.552263	0.303102	-1.82204	0.0684496	0.223807	916.289	678.558	842.277	703.999	389.055	568.487
AT1G12320	94.0482	-1.24758	0.75604	-1.65015	0.098913	0.286027	212.579	19.6066	164.741	44.9361	58.9477	63.4787
AT1G12330	263.178	0.607344	0.433983	1.39946	0.161674	0.390434	195.475	215.672	214.463	188.962	514.81	249.683
AT1G12340	3.55191	-4.90582	3.9162	-1.2527	0.210316	NA	0	21.3115	0	0	0	0
AT1G12350	575.209	0.544635	0.278636	1.95465	0.0506248	0.182874	547.33	396.394	460.077	759.305	584.237	703.908
AT1G12360	1093.3	0.861521	0.268031	3.21426	0.00130783	0.0116118	576.651	957.312	794.951	1613.09	1252.31	1365.5
AT1G12370	74.0854	-1.74361	0.707452	-2.46463	0.0137155	0.0727829	159.638	67.3443	115.019	11.5221	45.8482	45.1404
AT1G12380	22.1827	-1.16557	1.03097	-1.13056	0.25824	0.519353	30.9502	29.8361	31.1511	9.21766	6.54975	25.3915
AT1G12390	295.178	-0.0205151	0.390438	-0.0525437	0.958095	0.982319	268.778	213.115	409.756	377.924	229.241	272.253
AT1G12400	240.346	0.146582	0.431568	0.33965	0.73412	0.88506	296.47	184.131	203.68	226.985	159.814	370.998
AT1G12410	1475.13	-1.10781	0.235673	-4.70064	2.59e-06	6.33e-05	2366.88	2027.15	1652.2	1028.92	848.847	926.789
AT1G12411	0.284153	-1.24166	4.02452	-0.308523	0.757685	NA	0	1.70492	0	0	0	0
AT1G12420	56.6177	0.999528	0.702857	1.42209	0.154999	0.37993	23.6199	43.4754	46.1275	102.547	39.2985	84.6382
AT1G12423	0	NA	NA	NA	NA	NA	0	0	0	0	0	0
AT1G12430	113.701	0.620733	0.504133	1.23129	0.218215	0.468155	76.561	104.853	87.4626	159.005	86.4567	167.866
AT1G12440	1322.86	-0.163932	0.23499	-0.697611	0.48542	0.731353	1501.08	1333.25	1359.86	1461	1015.21	1266.75
AT1G12450	260.333	0.257002	0.451966	0.568633	0.569605	0.7908	215.022	168.787	327.685	412.49	155.884	282.127
AT1G12451	5.52878	6.33161	2.51898	2.51356	0.011952	0.0656252	0	0	0	13.8265	5.2398	14.1064
AT1G12460	100.685	-0.147609	0.62282	-0.237001	0.812656	0.922771	45.6108	168.787	103.038	61.067	129.685	95.9233
AT1G12470	241.58	-1.04363	0.382908	-2.72554	0.00641954	0.0407482	325.792	367.41	283.355	213.158	125.755	134.011
AT1G12480	11.2176	1.64821	2.06847	0.796823	0.425554	0.683494	15.4751	0.852459	0	10.3699	40.6084	0
AT1G12490	7.28931	6.73273	2.68831	2.50445	0.0122643	0.0670075	0	0	0	34.5662	9.16965	0
AT1G12500	815.16	0.583609	0.294348	1.98272	0.0473987	0.174605	539.185	596.722	820.711	867.613	805.619	1261.11
AT1G12510	0	NA	NA	NA	NA	NA	0	0	0	0	0	0
AT1G12520	1330.43	0.589435	0.260894	2.25928	0.0238658	0.108191	1217.65	1000.79	968.678	1270.89	2063.17	1461.42
AT1G12530	245.74	-0.107903	0.398408	-0.270835	0.786518	0.911323	177.556	254.033	333.077	256.942	275.089	177.74
AT1G12540	0	NA	NA	NA	NA	NA	0	0	0	0	0	0
AT1G12550	292.934	0.655934	0.42242	1.5528	0.12047	0.324391	122.986	243.803	315.105	271.921	444.073	359.712
AT1G12560	1.74153	-1.79637	3.90074	-0.46052	0.645143	NA	8.14479	0	0	2.30442	0	0
AT1G12570	15.2775	-7.01103	2.24814	-3.11859	0.00181716	0.0150024	26.8778	64.7869	0	0	0	0
AT1G12580	1903.08	0.294563	0.225665	1.30531	0.191788	0.433743	1658.28	1608.59	1861.28	1961.06	2532.13	1797.15
AT1G12590	4.15854	2.25726	2.1152	1.06716	0.285899	0.550273	0.814479	1.70492	1.79718	12.6743	6.54975	1.41064
AT1G12600	12.5556	-0.210454	1.31674	-0.159829	0.873015	0.947686	22.8054	6.81968	10.7831	6.91325	20.9592	7.05319
AT1G12610	3607.97	0.689423	0.338411	2.03724	0.0416263	0.159288	1510.86	3932.4	2842.53	4739.03	2902.85	5720.13
AT1G12620	75.8663	0.00604123	1.10845	0.00545016	0.995651	0.998587	20.362	101.443	105.434	162.461	65.4975	0
AT1G12630	3.37793	-4.83511	3.49417	-1.38376	0.166431	NA	15.4751	0	4.79247	0	0	0
AT1G12640	478.859	-0.29957	0.43943	-0.681725	0.495413	0.738588	616.561	380.197	588.875	746.631	212.212	328.678
AT1G12650	167.595	-0.51549	0.478828	-1.07657	0.281674	0.545991	215.022	150.885	225.845	145.178	193.873	74.7638
AT1G12660	0	NA	NA	NA	NA	NA	0	0	0	0	0	0
AT1G12663	0	NA	NA	NA	NA	NA	0	0	0	0	0	0
AT1G12665	0	NA	NA	NA	NA	NA	0	0	0	0	0	0
AT1G12667	0	NA	NA	NA	NA	NA	0	0	0	0	0	0
AT1G12669	0	NA	NA	NA	NA	NA	0	0	0	0	0	0
AT1G12670	0.599059	-2.35751	3.96161	-0.595088	0.551785	NA	0	0	3.59435	0	0	0
AT1G12672	5.29411	-5.48254	3.48913	-1.57132	0.116108	0.316884	31.7647	0	0	0	0	0
AT1G12680	258.403	-0.202877	0.421407	-0.481427	0.630213	0.830031	375.475	292.394	162.345	308.792	208.282	203.132
AT1G12700	46.5173	0.559555	1.05745	0.529154	0.596699	0.809596	0.814479	62.2295	49.7219	39.1751	70.7373	56.4255
AT1G12710	135.411	0.77207	0.604083	1.27809	0.201219	0.445609	34.2081	167.082	98.8447	149.787	238.411	124.136
AT1G12720.1	0	NA	NA	NA	NA	NA	0	0	0	0	0	0
AT1G12725.1	0	NA	NA	NA	NA	NA	0	0	0	0	0	0
AT1G12730	103.191	1.67415	0.548722	3.051	0.00228077	0.0180595	26.8778	57.1148	63.5003	126.743	192.563	152.349
AT1G12740	0.736179	0.508113	3.96925	0.128012	0.898139	NA	0	0	1.79718	0	2.6199	0
AT1G12750	704.278	0.443085	0.262887	1.68546	0.0918995	0.272039	562.805	646.164	581.686	648.693	893.386	892.933
AT1G12760	988.091	0.410937	0.276845	1.48436	0.137714	0.353198	949.683	833.705	761.404	1024.31	869.806	1489.63
AT1G12770	316.537	-2.00443	0.473	-4.2377	2.26e-05	0.000399069	575.022	447.541	497.818	94.4811	227.931	56.4255
AT1G12775	68.7011	0.193802	0.702207	0.275989	0.782556	0.909966	77.3755	80.1312	34.7454	36.8707	58.9477	124.136
AT1G12780	735.316	-0.297928	0.276728	-1.07661	0.281656	0.545991	639.366	1042.56	751.22	667.128	645.805	665.821
AT1G12790	47.0743	-0.113884	0.787024	-0.144702	0.884946	0.952563	58.6425	49.4427	38.9388	71.4369	48.4681	15.517
AT1G12800	992.259	-0.806711	0.261211	-3.08835	0.0020127	0.0162868	1496.2	1140.59	1150.79	569.191	808.239	788.546
AT1G12805	0	NA	NA	NA	NA	NA	0	0	0	0	0	0
AT1G12810	325.324	-0.557447	0.403664	-1.38097	0.167289	0.398679	523.71	246.361	391.785	175.136	331.417	283.538
AT1G12820	653.8	0.277568	0.368108	0.75404	0.450825	0.7037	508.235	595.017	670.347	1116.49	402.154	630.555
AT1G12830	250.774	1.20179	0.398032	3.01932	0.00253343	0.0197341	150.679	198.623	107.232	420.556	369.406	258.147
AT1G12840	2392.17	-0.476249	0.188167	-2.53099	0.0113741	0.0631282	2786.33	2720.2	2843.73	2011.76	1941.35	2049.66
AT1G12845	173.267	-1.51261	0.490819	-3.0818	0.00205753	0.0165722	245.973	156.853	366.624	61.067	124.445	84.6382
AT1G12850	530.609	-0.3732	0.311617	-1.19763	0.231063	0.484916	813.665	487.607	495.422	430.926	500.401	455.636
AT1G12855	4.09357	-5.11549	3.77765	-1.35415	0.17569	0.410432	0	0	24.5614	0	0	0
AT1G12860	270.682	-0.902919	0.395119	-2.28518	0.022302	0.103194	400.724	337.574	319.898	148.635	279.019	138.242
AT1G12870	3.77446	1.31654	3.49255	0.376957	0.706205	NA	6.51583	0	0	16.1309	0	0
AT1G12880	178.529	2.93911	0.599254	4.90461	9.36e-07	2.57e-05	23.6199	21.3115	77.8777	153.244	446.693	348.427
AT1G12890	9.37642	3.80854	1.87274	2.03368	0.0419841	0.160319	0	0	3.59435	14.9787	23.5791	14.1064
AT1G12900	19393.1	-1.43329	0.201742	-7.10455	1.21e-12	1.76e-10	28026.2	27762	29126.2	8816.7	9878.33	12749.3
AT1G12910	972.292	-1.0959	0.264819	-4.13829	3.5e-05	0.000582528	1600.45	1184.07	1190.33	649.845	713.922	495.134
AT1G12920	794.381	-0.960722	0.262381	-3.66155	0.000250693	0.00298754	1008.33	1146.56	993.24	421.708	620.916	575.54
AT1G12930	216.692	-0.22629	0.408072	-0.554534	0.579213	0.798521	244.344	186.689	269.577	140.569	268.54	190.436
AT1G12935.1	0	NA	NA	NA	NA	NA	0	0	0	0	0	0
AT1G12938	0	NA	NA	NA	NA	NA	0	0	0	0	0	0
AT1G12940	0	NA	NA	NA	NA	NA	0	0	0	0	0	0
AT1G12950	1.17553	4.09077	3.95543	1.03422	0.301035	NA	0	0	0	0	0	7.05319
AT1G12960	0	NA	NA	NA	NA	NA	0	0	0	0	0	0
AT1G12970	212.873	-0.277815	0.414668	-0.669968	0.502878	0.743089	195.475	174.754	329.482	229.289	167.674	180.562
AT1G12980	0	NA	NA	NA	NA	NA	0	0	0	0	0	0
AT1G12990	913.698	0.170586	0.245622	0.694507	0.487364	0.732994	743.619	804.722	1030.38	1001.27	927.444	974.75
AT1G13000	316.943	0.561924	0.371606	1.51215	0.130496	0.341607	246.787	321.377	200.086	305.335	513.5	314.572
AT1G13010	0.654975	3.252	3.99337	0.814351	0.415444	NA	0	0	0	0	3.92985	0
AT1G13020	181.539	0.503213	0.508171	0.990243	0.322055	0.588767	157.194	141.508	152.161	364.098	102.176	172.098
AT1G13030	36.8253	-1.28945	1.45922	-0.883657	0.376881	0.643194	60.2714	32.3935	64.0993	0	64.1875	0
AT1G13040	3.81523	2.05372	3.07162	0.668611	0.503744	NA	3.25792	0	1.19812	18.4353	0	0
AT1G13050	30.1253	0.925634	0.920788	1.00526	0.31477	0.581512	11.4027	26.4262	24.5614	67.9803	23.5791	26.8021
AT1G13060	678.185	-0.460692	0.316653	-1.45488	0.145702	0.366358	703.71	646.164	1005.82	406.729	581.618	725.067
AT1G13070	0.476188	-0.279875	4.02452	-0.0695425	0.944558	NA	0	1.70492	0	1.15221	0	0
AT1G13080	429.895	-0.2311	0.310745	-0.743695	0.457061	0.708439	509.864	382.754	499.615	308.792	428.353	449.993
AT1G13090	988.796	0.146816	0.342866	0.428203	0.668503	0.849901	986.334	762.951	1065.73	592.235	1553.6	971.929
AT1G13100	463.134	0.37993	0.3175	1.19663	0.231452	0.485277	333.936	407.476	465.469	419.404	476.822	675.695
AT1G13110	3356.7	0.667315	0.237892	2.80512	0.00502978	0.0338141	2313.93	2357.05	3109.72	3170.88	4756.43	4432.22
AT1G13120	283.893	-0.383266	0.448405	-0.854733	0.392699	0.656554	430.045	353.771	180.916	294.965	302.598	141.064
AT1G13130	0	NA	NA	NA	NA	NA	0	0	0	0	0	0
AT1G13140	19.5606	-0.67604	1.69287	-0.399344	0.689639	0.861964	0	27.2787	44.9294	24.1964	20.9592	0
AT1G13145	34.4852	-1.54315	0.95035	-1.62377	0.104426	0.296416	50.4977	62.2295	41.3351	9.21766	37.9885	5.64255
AT1G13150	34.3667	2.27245	1.39321	1.63109	0.102871	0.293575	0	26.4262	8.98589	10.3699	151.954	8.46382
AT1G13160	113.618	-0.202617	0.516819	-0.392047	0.695023	0.864506	109.955	126.164	128.798	150.939	62.8776	102.977
AT1G13170	64.8947	-0.34282	0.643487	-0.532753	0.594205	0.80757	96.923	61.3771	59.3068	33.414	72.0472	66.2999
AT1G13180	129.291	0.46907	0.515108	0.910625	0.362493	0.630799	62.7149	142.361	120.411	202.789	120.515	126.957
AT1G13190	423.286	0.150394	0.406688	0.369802	0.71153	0.87306	306.244	487.607	410.355	715.521	265.92	354.07
AT1G13195	271.455	0.541749	0.369458	1.46633	0.142558	0.361067	158.823	254.033	250.407	361.793	349.757	253.915
AT1G13200	1.12854	2.89012	3.96413	0.729069	0.46596	NA	0	0.852459	0	4.60883	1.30995	0
AT1G13210	1004.13	0.928805	0.378862	2.45157	0.0142235	0.0747693	290.769	895.935	887.805	1360.76	1088.57	1500.92
AT1G13220	782.629	0.286397	0.32086	0.892591	0.372076	0.638835	860.904	787.673	467.865	945.963	1011.28	622.091
AT1G13230	0.499216	-2.09769	3.97232	-0.528076	0.597446	NA	0	0	2.9953	0	0	0
AT1G13240	0.399373	-1.78043	3.98826	-0.446417	0.655296	NA	0	0	2.39624	0	0	0
AT1G13245	1393.12	0.177669	0.282458	0.62901	0.529343	0.763552	1427.78	1457.71	1036.97	1391.87	1079.4	1965.02
AT1G13250	634.681	0.158233	0.296036	0.534507	0.59299	0.807022	455.294	692.197	651.776	527.711	716.542	764.565
AT1G13260	2499.08	-0.674109	0.282613	-2.38527	0.0170664	0.0851333	3066.51	3507.87	2643.05	1890.77	1248.38	2637.89
AT1G13270	322.712	-1.22771	0.392102	-3.13109	0.00174157	0.0144853	471.583	525.115	360.634	202.789	263.3	112.851
AT1G13280	441.827	-0.185499	0.318536	-0.582351	0.56033	0.785454	583.167	416	411.554	449.361	318.318	472.563
AT1G13290	0	NA	NA	NA	NA	NA	0	0	0	0	0	0
AT1G13300	50.5402	-3.02923	1.11479	-2.71731	0.00658155	0.0414887	127.873	121.049	20.9671	0	6.54975	26.8021
AT1G13310	8.15098	1.80211	2.13475	0.844179	0.398569	0.660527	0	0	10.7831	11.5221	2.6199	23.9808
AT1G13320	713.905	-0.572316	0.284693	-2.01029	0.0444004	0.16692	945.61	886.558	729.654	677.498	620.916	423.191
AT1G13330	55.8587	0.862294	0.890709	0.968098	0.332995	0.600801	42.3529	67.3443	9.58494	144.026	37.9885	33.8553
AT1G13340	1495.7	0.4379	0.415117	1.05488	0.291479	0.557	764.796	2185.71	861.447	2409.27	906.485	1846.52
AT1G13350	1512.25	1.11645	0.262439	4.25412	2.1e-05	0.000374821	979.818	1115.02	769.791	1800.9	2646.1	1761.89
AT1G13360	721.117	0.863157	0.509168	1.69523	0.0900318	0.268349	450.407	510.623	573.899	1580.83	193.873	1017.07
AT1G13370	15.1108	2.80011	1.53959	1.81874	0.0689515	0.224973	0	5.96722	5.39153	34.5662	41.9184	2.82127
AT1G13380	323.393	-0.668246	0.351494	-1.90116	0.0572811	0.198751	447.963	410.885	331.879	176.288	303.908	269.432
AT1G13390	2476.3	1.48601	0.225209	6.59837	4.16e-11	3.87e-09	1184.25	1363.94	1360.46	4035.03	2855.69	4058.4
AT1G13400	0.271493	-1.18392	4.02925	-0.293832	0.768887	NA	1.62896	0	0	0	0	0
AT1G13410	2.51533	2.37612	3.83808	0.619091	0.535857	NA	0	0	2.39624	0	0	12.6957
AT1G13420	26.6014	0.29592	1.52231	0.19439	0.845871	0.935632	10.5882	42.623	18.5708	86.4156	0	1.41064
AT1G13430	29.5562	0.131002	1.35147	0.0969334	0.922779	0.968284	48.8687	35.8033	0	14.9787	17.0293	60.6574
AT1G13440	9871.87	-0.842552	0.204337	-4.12334	3.73e-05	0.0006171	13694.7	11024	13306.3	6385.54	6471.15	8349.56
AT1G13448	20.9318	-0.267929	1.01688	-0.26348	0.79218	0.914236	20.362	12.7869	35.3445	14.9787	20.9592	21.1596
AT1G13450	682.341	-0.294256	0.321592	-0.914999	0.360192	0.628604	614.932	732.263	908.173	785.806	653.665	399.21
AT1G13460	169.345	0.472567	0.456126	1.03605	0.30018	0.565522	85.5203	195.213	144.972	222.376	204.352	163.634
AT1G13470	9.18976	2.52936	2.11838	1.19401	0.232474	0.486661	7.33031	0.852459	0	0	31.4388	15.517
AT1G13480	0	NA	NA	NA	NA	NA	0	0	0	0	0	0
AT1G13485	0	NA	NA	NA	NA	NA	0	0	0	0	0	0
AT1G13490	0	NA	NA	NA	NA	NA	0	0	0	0	0	0
AT1G13500	0	NA	NA	NA	NA	NA	0	0	0	0	0	0
AT1G13510	0	NA	NA	NA	NA	NA	0	0	0	0	0	0
AT1G13520	35.8493	-4.29138	1.48987	-2.88037	NA	NA	183.258	9.37705	11.9812	0	10.4796	0
AT1G13530	13.4166	0.16273	1.64257	0.0990703	0.921082	0.967607	1.62896	9.37705	26.9577	24.1964	18.3393	0
AT1G13540	9.94178	-1.40036	2.01818	-0.693876	0.48776	0.733368	23.6199	19.6066	0	0	6.54975	9.87446
AT1G13550	14.4937	0.245787	1.55619	0.157941	0.874503	0.948535	21.9909	17.9016	0	24.1964	14.4094	8.46382
AT1G13560	3209.64	0.543927	0.289394	1.87954	0.0601712	0.205032	1552.4	3309.25	2973.13	4066.14	3095.41	4261.53
AT1G13570	220.299	-0.0268709	0.422131	-0.0636554	0.949245	0.979213	130.317	253.18	283.355	206.245	255.44	193.257
AT1G13580	126.717	-0.228273	0.57779	-0.395079	0.692785	0.863268	63.5294	176.459	170.133	101.394	176.843	71.9425
AT1G13590	4.39289	-5.21293	3.20637	-1.62581	0.103991	0.295472	0	22.1639	4.19341	0	0	0
AT1G13600	0	NA	NA	NA	NA	NA	0	0	0	0	0	0
AT1G13605	0	NA	NA	NA	NA	NA	0	0	0	0	0	0
AT1G13607	1.96492	4.83824	3.93583	1.22928	0.218966	NA	0	0	0	0	11.7895	0
AT1G13608	5.52525	6.32964	2.95792	2.13989	0.0323635	0.134008	0	0	0	0	27.5089	5.64255
AT1G13609	193.056	4.94772	0.731908	6.76003	1.38e-11	1.53e-09	7.33031	5.11476	23.3633	64.5237	476.822	581.182
AT1G13610	12.1676	-1.5579	2.56726	-0.606835	0.543961	0.773496	54.5701	0	0	18.4353	0	0
AT1G13620	0.199686	-0.811322	4.06308	-0.199682	0.84173	NA	0	0	1.19812	0	0	0
AT1G13630	12.9945	-1.19707	1.50831	-0.793651	0.427399	0.684634	8.14479	26.4262	19.7689	9.21766	14.4094	0
AT1G13635	4.58618	0.139151	2.93394	0.0474278	0.962172	0.983429	11.4027	1.70492	0	0	14.4094	0
AT1G13640	381.314	-0.350733	0.344061	-1.01939	0.308016	0.574464	422.715	414.295	445.7	404.425	387.745	213.006
AT1G13650	2569.57	1.4178	0.357466	3.96624	7.3e-05	0.00107472	1511.67	891.673	1794.78	2032.5	5753.3	3433.49
AT1G13660.1	0	NA	NA	NA	NA	NA	0	0	0	0	0	0
AT1G13670	33.5928	0.25574	1.04019	0.245859	0.805791	0.92002	13.0317	69.9017	8.98589	16.1309	31.4388	62.068
AT1G13680	0	NA	NA	NA	NA	NA	0	0	0	0	0	0
AT1G13690	491.938	-0.342465	0.323426	-1.05887	0.289661	0.555054	559.547	485.049	605.649	437.839	565.898	297.644
AT1G13700	671.598	-1.26933	0.278901	-4.55118	5.33e-06	0.000117223	935.022	1054.49	859.051	410.186	468.962	301.876
AT1G13710	0.678733	-2.51409	3.95601	-0.635513	0.525094	NA	4.0724	0	0	0	0	0
AT1G13720	0	NA	NA	NA	NA	NA	0	0	0	0	0	0
AT1G13730	150.696	-0.59806	0.473783	-1.26231	0.206837	0.453282	238.642	122.754	183.312	160.157	104.796	94.5127
AT1G13740	603.622	2.03023	0.461074	4.40327	1.07e-05	0.000211043	102.624	194.361	414.549	1342.32	982.462	585.414
AT1G13750	81.1494	0.470782	0.729011	0.645781	0.518421	0.754885	106.697	76.7214	20.9671	102.547	136.235	43.7297
AT1G13755	5.94794	4.40846	3.03676	1.4517	0.146585	0.367706	1.62896	0	0	0	34.0587	0
AT1G13760	0	NA	NA	NA	NA	NA	0	0	0	0	0	0
AT1G13770	125.178	0.749823	0.521672	1.43735	0.15062	0.373357	117.285	46.8853	115.618	130.2	168.983	172.098
AT1G13780	54.2196	0.231868	0.909634	0.254903	0.798798	0.917069	8.95927	86.0984	54.5144	58.7626	19.6492	97.334
AT1G13790	37.7423	2.77349	1.12901	2.45657	0.0140271	0.0740431	0	23.0164	5.99059	43.7839	74.6671	78.9957
AT1G13800	6.67575	1.60776	2.60983	0.61604	0.537868	0.769202	6.51583	3.40984	0	0	30.1288	0
AT1G13810	35.0116	-1.70571	0.900292	-1.89462	0.0581431	0.200704	57.0135	29.8361	73.6843	6.91325	14.4094	28.2127
AT1G13820	1017.97	-0.55653	0.234392	-2.37435	0.0175799	0.0870171	1255.93	1176.39	1202.91	725.891	784.66	962.054
AT1G13830	6.88992	1.38984	2.91589	0.476643	0.633616	0.83236	0	0	11.3821	29.9574	0	0
AT1G13840	0	NA	NA	NA	NA	NA	0	0	0	0	0	0
AT1G13850	0.142077	-0.176531	4.08047	-0.0432623	0.965492	NA	0	0.852459	0	0	0	0
AT1G13860	173.309	0.091552	0.544271	0.16821	0.866418	0.944627	106.697	184.131	212.666	203.941	263.3	69.1212
AT1G13870	83.6348	-0.295677	0.619899	-0.476976	0.633379	0.832158	110.769	101.443	64.6984	124.438	51.088	49.3723
AT1G13880	538.131	-0.0239616	0.333532	-0.0718418	0.942728	0.976567	605.972	525.115	496.62	544.994	336.657	719.425
AT1G13890	1.53119	-3.69015	3.92865	-0.939292	0.347581	NA	4.0724	5.11476	0	0	0	0
AT1G13900	124.62	0.109883	0.493617	0.222608	0.823841	0.926985	74.9321	156	128.798	149.787	130.995	107.208
AT1G13910	163.401	0.0299469	0.44919	0.0666686	0.946846	0.977964	174.299	161.115	149.765	137.113	241.031	117.083
AT1G13920	33.8998	0.0495263	1.02214	0.0484535	0.961355	0.983284	39.9095	5.96722	53.9153	13.8265	61.5676	28.2127
AT1G13930	5108	-0.248853	0.218448	-1.13919	0.254625	0.51455	5686.69	4366.3	6589.05	5134.24	4383.09	4488.65
AT1G13940	108.095	-0.179758	0.517207	-0.347556	0.728173	0.881657	147.421	112.525	84.4673	78.3501	90.3865	135.421
AT1G13950	190.069	-0.481939	0.48456	-0.99459	0.319936	0.586811	327.421	145.771	191.1	93.3289	176.843	205.953
AT1G13960	354.631	0.162152	0.358854	0.45186	0.65137	0.841492	321.719	323.935	358.836	479.319	412.634	231.344
AT1G13970	38.4526	0.611852	0.997217	0.613559	0.539507	0.770246	30.9502	18.7541	41.3351	13.8265	14.4094	111.44
AT1G13980	154.558	-0.325392	0.44823	-0.725949	0.46787	0.717781	221.538	182.426	112.024	141.722	125.755	143.885
AT1G13990	532.772	-1.06312	0.265388	-4.00593	6.18e-05	0.000934107	667.058	687.082	807.532	339.901	335.347	359.712
AT1G14000	662.635	-0.591733	0.281157	-2.10464	0.0353229	0.142567	755.837	702.427	931.537	599.148	411.324	575.54
AT1G14010	445.088	-0.130781	0.375475	-0.348309	0.727608	0.881291	320.09	514.033	561.917	621.04	326.177	327.268
AT1G14020	176.78	0.485587	0.447944	1.08404	0.278349	0.542421	210.95	96.3279	134.788	241.964	201.732	174.919
AT1G14030	731.804	-0.0989497	0.258093	-0.383388	0.701432	0.867701	892.669	637.64	740.437	710.912	753.221	655.946
AT1G14040	23.9036	0.322288	0.954822	0.337538	0.735712	0.885967	20.362	14.4918	28.7548	16.1309	34.0587	29.6234
AT1G14048	0.284153	-1.24166	4.02452	-0.308523	0.757685	NA	0	1.70492	0	0	0	0
AT1G14060	92.0908	-1.29386	0.629674	-2.05482	0.0398967	0.154818	83.8913	154.295	154.557	89.8722	26.199	43.7297
AT1G14070	23.5567	0.336025	0.98131	0.342425	0.732031	0.883936	10.5882	21.3115	30.552	36.8707	22.2691	19.7489
AT1G14071	1.08597	-3.19437	3.93758	-0.811251	0.417221	NA	6.51583	0	0	0	0	0
AT1G14080	2.40011	2.91489	3.87575	0.752085	0.452	NA	0	1.70492	0	0	0	12.6957
AT1G14090	35.9298	-0.905056	0.829951	-1.09049	0.275496	0.539024	66.7873	34.9508	38.9388	38.0229	15.7194	21.1596
AT1G14100	0	NA	NA	NA	NA	NA	0	0	0	0	0	0
AT1G14110	0	NA	NA	NA	NA	NA	0	0	0	0	0	0
AT1G14120	110.482	1.03472	0.646856	1.59961	0.109685	0.305315	48.8687	82.6886	85.6654	114.069	53.7079	277.896
AT1G14130	295.29	0.696073	0.501829	1.38707	0.165419	0.395842	144.163	211.41	320.497	569.191	142.784	383.693
AT1G14140	351.286	-0.426955	0.305088	-1.39945	0.161679	0.390434	364.072	433.902	410.954	338.749	293.429	266.61
AT1G14150	1329.94	-1.29667	0.226566	-5.72316	1.05e-08	5.18e-07	1972.67	1581.31	2117.07	798.48	761.081	749.048
AT1G14160	2.35989	-1.37811	3.83582	-0.359272	0.719391	NA	0	10.2295	0	0	3.92985	0
AT1G14170	43.3338	0.427924	1.01054	0.42346	0.67196	0.851697	42.3529	31.541	37.1417	125.591	7.8597	15.517
AT1G14180	51.1271	0.664726	0.705147	0.942678	0.345846	0.614403	21.9909	42.623	53.9153	69.1325	47.1582	71.9425
AT1G14182	5.2144	-0.287878	2.83617	-0.101502	0.919152	0.96666	15.4751	1.70492	0	0	0	14.1064
AT1G14185	34.6586	-0.630018	0.853477	-0.738178	0.460406	0.711046	20.362	37.5082	68.2927	23.0442	24.889	33.8553
AT1G14190	3.89544	0.367514	2.7719	0.132586	0.894521	NA	0	10.2295	0	1.15221	9.16965	2.82127
AT1G14200	410.721	-0.0765053	0.322103	-0.237518	0.812255	0.922634	469.14	466.295	330.082	480.471	399.535	318.804
AT1G14205	32.077	-0.639718	0.928779	-0.688774	0.490966	0.735546	12.2172	69.0492	35.9435	20.7397	24.889	29.6234
AT1G14210	140.498	-0.187379	0.492834	-0.380206	0.703792	0.868884	181.629	99.7378	167.137	106.003	100.866	187.615
AT1G14220	0	NA	NA	NA	NA	NA	0	0	0	0	0	0
AT1G14225	0	NA	NA	NA	NA	NA	0	0	0	0	0	0
AT1G14230	230.057	0.274213	0.414091	0.662203	0.507841	0.746827	210.136	172.197	242.619	367.554	203.042	184.793
AT1G14240	0.135747	-0.176531	4.08047	-0.0432623	0.965492	NA	0.814479	0	0	0	0	0
AT1G14250	1221.61	-1.00737	0.319083	-3.15707	0.00159362	0.0135687	2325.34	1035.74	1533.59	708.608	1012.59	713.782
AT1G14260	11.8409	0.334441	1.64747	0.203003	0.839133	0.933133	18.733	12.7869	0	21.892	9.16965	8.46382
AT1G14270	1695.67	0.068968	0.217997	0.316371	0.751721	0.896069	1628.14	1617.97	1718.7	1560.09	1599.45	2049.66
AT1G14280	1145.23	-0.0287374	0.222448	-0.129187	0.89721	0.957906	1216.02	1104.79	1149	1045.05	1274.58	1081.96
AT1G14290	922.008	-0.0214699	0.253182	-0.0848004	0.93242	0.972826	732.217	1019.54	1034.57	930.984	835.748	978.982
AT1G14300	93.6472	-0.627691	0.533054	-1.17754	0.238981	0.495031	136.018	130.426	74.8824	81.8068	66.8074	71.9425
AT1G14310	229.719	0.505228	0.414734	1.2182	0.223149	0.474593	124.615	272.787	172.529	271.921	306.528	229.934
AT1G14315	0.43665	2.66613	4.03602	0.660585	0.508878	NA	0	0	0	0	2.6199	0
AT1G14320	9456.24	-1.18667	0.208144	-5.70123	1.19e-08	5.81e-07	14020.4	13243.8	12155.5	5096.22	7088.14	5133.31
AT1G14330	393.666	-0.344128	0.406447	-0.846674	0.397177	0.659678	329.864	517.443	474.455	547.299	285.569	207.364
AT1G14340	176.193	-0.781458	0.446305	-1.75095	0.0799546	0.247932	263.077	221.639	183.312	81.8068	130.995	176.33
AT1G14345	1258.75	-1.35458	0.257345	-5.26369	1.41e-07	4.96e-06	1713.66	1855.8	1858.88	524.255	712.613	887.291
AT1G14350	86.55	-0.411122	0.578931	-0.71014	0.477617	0.725272	57.828	116.787	121.609	55.306	93.0064	74.7638
AT1G14360	109.77	-0.581345	0.581834	-0.999159	0.317718	0.584501	192.217	54.5574	147.968	100.242	73.3572	90.2808
AT1G14370	237.568	0.233544	0.401931	0.581056	0.561203	0.786239	234.57	259.148	161.746	228.137	347.137	194.668
AT1G14380	340.736	-0.518183	0.331851	-1.56149	0.118408	0.32051	465.882	402.361	336.072	311.096	311.768	217.238
AT1G14390	25.1052	2.35361	1.12118	2.09923	0.0357966	0.143959	10.5882	2.55738	11.3821	9.21766	75.9771	40.9085
AT1G14400	1226.2	-0.36086	0.249135	-1.44845	0.147491	0.369241	1378.91	1362.23	1395.21	1215.58	797.759	1207.51
AT1G14410	262.84	-0.346796	0.438175	-0.791456	0.428678	0.685603	285.068	223.344	374.412	237.355	332.727	124.136
AT1G14420	1.09162	3.98973	3.95894	1.00778	0.313561	NA	0	0	0	0	6.54975	0
AT1G14430	47.2195	-0.696529	0.729676	-0.954573	0.339794	0.60767	61.9004	44.3279	68.8918	39.1751	19.6492	49.3723
AT1G14440	0.135747	-0.176531	4.08047	-0.0432623	0.965492	NA	0.814479	0	0	0	0	0
AT1G14450	937.477	-0.199225	0.234192	-0.850689	0.394942	0.658008	1031.94	960.722	1013.61	924.071	747.981	946.537
AT1G14455	0.43665	2.66613	4.03602	0.660585	0.508878	NA	0	0	0	0	2.6199	0
AT1G14460	63.9601	0.762949	0.644939	1.18298	0.236817	0.49227	39.095	48.5902	54.5144	56.4582	124.445	60.6574
AT1G14470	0	NA	NA	NA	NA	NA	0	0	0	0	0	0
AT1G14480	29.8403	0.287818	1.17148	0.245687	0.805924	0.92002	1.62896	62.2295	16.7737	14.9787	34.0587	49.3723
AT1G14490	3.84069	5.80852	3.82025	1.52046	0.128396	NA	0	0	0	23.0442	0	0
AT1G14500	10.6015	-6.4861	2.41852	-2.68184	0.00732176	0.045013	36.6516	0	26.9577	0	0	0
AT1G14510	268.572	0.304183	0.335319	0.907144	0.36433	0.632612	250.045	251.476	219.855	315.705	327.487	246.861
AT1G14518	0.43665	2.66613	4.03602	0.660585	0.508878	NA	0	0	0	0	2.6199	0
AT1G14520	556.384	-0.0989351	0.311032	-0.318086	0.750419	0.895131	477.285	599.279	649.38	406.729	703.443	502.187
AT1G14530	238.919	2.38674	0.373481	6.39052	1.65e-10	1.3e-08	87.1493	83.541	59.9059	466.644	404.774	331.5
AT1G14540	191.456	0.180147	0.503629	0.357698	0.720569	0.877423	164.525	152.59	221.652	353.728	116.586	139.653
AT1G14549	0	NA	NA	NA	NA	NA	0	0	0	0	0	0
AT1G14550	0	NA	NA	NA	NA	NA	0	0	0	0	0	0
AT1G14560	508.414	0.675207	0.307502	2.19578	0.0281074	0.12164	390.95	367.41	416.346	762.762	440.143	672.874
AT1G14570	534.058	0.810323	0.312416	2.59373	0.00949414	0.0549922	425.973	419.41	318.699	763.914	480.751	795.599
AT1G14580	226.306	-0.903473	0.43957	-2.05536	0.0398443	0.154674	369.773	225.902	289.345	162.461	220.072	90.2808
AT1G14590	174.061	1.48148	0.517156	2.86467	0.00417447	0.029297	59.457	143.213	73.0852	381.381	155.884	231.344
AT1G14600	110.358	0.264124	0.488327	0.540876	0.588593	0.804027	98.552	91.2132	110.826	85.2634	130.995	145.296
AT1G14610	442.074	-0.444108	0.326752	-1.35916	0.174096	0.407743	583.981	456.066	488.233	255.79	429.663	438.708
AT1G14620	130.293	-1.08984	0.486543	-2.23996	0.0250937	0.111832	168.597	156.853	206.675	107.155	91.6965	50.7829
AT1G14630	1.08597	-3.19437	3.93758	-0.811251	0.417221	NA	6.51583	0	0	0	0	0
AT1G14640	14.9804	1.4124	1.49601	0.944112	0.345113	0.61375	3.25792	19.6066	1.79718	21.892	41.9184	1.41064
AT1G14642	44.5116	0.313701	0.860212	0.364679	0.715351	0.875002	53.7556	49.4427	16.1746	92.1766	30.1288	25.3915
AT1G14650	368.882	0.311009	0.362668	0.857557	0.391137	0.655084	395.022	361.443	231.836	387.142	533.149	304.698
AT1G14660	119.349	1.12763	0.463991	2.43028	0.0150871	0.0778252	73.3031	63.9345	87.4626	190.114	136.235	165.045
AT1G14670	312.124	-0.497069	0.340223	-1.46101	0.144013	0.363792	323.348	398.099	374.412	246.573	203.042	327.268
AT1G14680	14.5185	-2.69323	1.74477	-1.5436	0.122685	0.328356	4.0724	28.9836	42.5332	11.5221	0	0
AT1G14685	677.754	0.732826	0.291817	2.51125	0.0120304	0.0659413	515.565	548.984	463.672	1096.9	627.466	813.938
AT1G14686	0.40724	-1.77336	3.98865	-0.4446	0.656609	NA	2.44344	0	0	0	0	0
AT1G14687	35.2887	-0.293626	1.15641	-0.253911	0.799564	0.917513	53.7556	52.8525	10.184	66.8281	1.30995	26.8021
AT1G14688	2.07126	1.49952	3.82789	0.391734	0.695254	NA	3.25792	0	0	0	9.16965	0
AT1G14690	291.62	0.0671967	0.420874	0.15966	0.873149	0.947686	333.122	364	157.553	208.55	336.657	349.838
AT1G14700	954.541	-0.543559	0.339947	-1.59895	0.109831	0.305639	1595.56	664.918	1135.82	625.649	717.852	987.446
AT1G14710	325.572	0.258799	0.389963	0.663651	0.506913	0.746245	236.199	397.246	255.798	223.528	423.114	417.549
AT1G14720	659.613	0.0302472	0.290101	0.104264	0.91696	0.965892	529.411	724.591	703.894	568.039	844.917	586.825
AT1G14730	24.1167	-0.496586	1.54476	-0.321465	0.747858	0.893854	80.6334	3.40984	0.599059	8.06546	2.6199	49.3723
AT1G14740	715.371	0.763193	0.251731	3.03178	0.00243113	0.0190627	449.592	550.689	590.672	888.352	859.327	953.591
AT1G14750	0	NA	NA	NA	NA	NA	0	0	0	0	0	0
AT1G14755	0	NA	NA	NA	NA	NA	0	0	0	0	0	0
AT1G14760	1.35747	-3.51704	3.93143	-0.894597	0.371003	NA	8.14479	0	0	0	0	0
AT1G14770	95.8384	-0.308945	0.573929	-0.538298	0.590372	0.805464	114.027	118.492	85.6654	53.0016	137.545	66.2999
AT1G14780	47.2899	0.512138	0.832316	0.615316	0.538346	0.769419	43.9819	58.8197	14.3774	79.5024	23.5791	63.4787
AT1G14790	62.1384	-0.475211	0.676215	-0.702752	0.48221	0.729221	39.095	69.9017	107.831	66.8281	51.088	38.0872
AT1G14800	0	NA	NA	NA	NA	NA	0	0	0	0	0	0
AT1G14810	267.367	-0.699904	0.418129	-1.6739	0.0941509	0.276531	449.592	295.803	247.411	182.049	140.165	289.181
AT1G14820	287.633	-1.00523	0.401966	-2.50078	0.012392	0.0674856	551.402	316.262	284.553	231.594	138.855	203.132
AT1G14830	535.32	0.0159502	0.289039	0.0551836	0.955992	0.981645	567.692	575.41	454.686	652.15	514.81	447.172
AT1G14840	256.776	0.556516	0.382945	1.45325	0.146153	0.367079	177.556	256.59	189.303	226.985	288.189	402.032
AT1G14850	78.4231	-0.407806	0.561462	-0.726329	0.467637	0.717779	101.81	91.2132	75.4814	87.5678	52.398	62.068
AT1G14860	55.6367	-1.6544	0.7386	-2.23991	0.0250966	0.111832	91.2217	92.9181	69.4908	47.2405	11.7895	21.1596
AT1G14870	330.138	-1.11637	0.419265	-2.66268	0.00775203	0.0469413	318.461	459.476	576.894	112.916	225.311	287.77
AT1G14880	8.22872	6.90326	3.0143	2.29017	0.0220112	0.102296	0	0	0	0	0	49.3723
AT1G14890	276.197	-3.16119	0.464653	-6.80333	1.02e-11	1.19e-09	348.597	686.23	456.483	85.2634	52.398	28.2127
AT1G14900	69.9785	-1.31817	0.823952	-1.59981	0.109641	0.305234	161.267	43.4754	95.2504	76.0457	35.3686	8.46382
AT1G14910	176.701	-0.0844907	0.395217	-0.213783	0.830716	0.929395	177.556	171.344	196.491	138.265	203.042	173.508
AT1G14920	323.169	0.171914	0.392425	0.43808	0.661328	0.847047	234.57	219.082	457.681	397.512	280.329	349.838
AT1G14930	7.52902	-0.229951	2.88326	-0.079754	0.936433	0.97396	24.4344	0	0	20.7397	0	0
AT1G14940	0	NA	NA	NA	NA	NA	0	0	0	0	0	0
AT1G14950	0	NA	NA	NA	NA	NA	0	0	0	0	0	0
AT1G14960	0	NA	NA	NA	NA	NA	0	0	0	0	0	0
AT1G14970	70.3073	0.464924	0.687045	0.676701	0.498596	0.740262	98.552	39.2131	39.5379	89.8722	43.2283	111.44
AT1G14980	900.837	-1.28749	0.297454	-4.32836	1.5e-05	0.000283915	1536.11	1248.85	1048.95	368.707	672.004	530.4
AT1G14990	118.621	-0.995823	0.591197	-1.68442	0.0921009	0.272458	102.624	166.23	204.878	71.4369	35.3686	131.189
AT1G15000	252.832	-0.989443	0.373178	-2.6514	0.00801592	0.0481769	370.588	245.508	392.384	139.417	189.943	179.151
AT1G15002	20.9631	0.635626	1.04373	0.608994	0.542529	0.772224	13.0317	12.7869	23.3633	32.2618	10.4796	33.8553
AT1G15010	7315.78	0.350385	0.316298	1.10777	0.267963	0.530326	4817.64	8184.46	6293.71	12068.2	4735.47	7795.18
AT1G15015	60.0166	0.187854	0.80324	0.23387	0.815086	0.923673	101.81	52.8525	13.7784	42.6317	61.5676	87.4595
AT1G15020	254.854	0.143972	0.34556	0.416635	0.676946	0.854535	234.57	285.574	206.675	294.965	263.3	244.04
AT1G15030	476.667	-0.569327	0.309147	-1.8416	0.0655331	0.217439	678.461	420.263	609.842	429.774	337.967	383.693
AT1G15040	395.325	-1.94281	0.470891	-4.12581	3.69e-05	0.000611001	693.122	792.787	397.176	279.987	72.0472	136.832
AT1G15045	0.576104	3.08434	4.0039	0.770333	0.441103	NA	0	0	0	3.45662	0	0
AT1G15050	48.0049	-0.445707	0.795172	-0.560516	0.575128	0.795176	38.2805	63.082	64.6984	27.653	75.9771	18.3383
AT1G15060	328.925	-0.251906	0.375742	-0.670423	0.502588	0.742902	430.045	269.377	373.214	344.51	193.873	362.534
AT1G15080	102.305	-0.514574	0.54868	-0.93784	0.348327	0.616959	70.0452	139.803	150.963	61.067	90.3865	101.566
AT1G15090	0.890081	3.69299	3.97075	0.930049	0.352346	NA	0	0	0	0	3.92985	1.41064
AT1G15100	1198.89	1.32182	0.327079	4.04128	5.32e-05	0.000824365	408.868	753.574	892.598	2257.18	1515.61	1365.5
AT1G15110	113.931	0.731034	0.603054	1.21222	0.225428	0.477336	144.163	34.9508	77.8777	120.982	189.943	115.672
AT1G15120	691.495	0.142662	0.266003	0.536317	0.591739	0.806225	610.045	585.64	775.781	737.413	626.156	813.938
AT1G15125	13.7886	0.322415	1.28077	0.251736	0.801245	0.918211	13.0317	15.3443	8.38683	13.8265	3.92985	28.2127
AT1G15130	759.855	0.288762	0.278037	1.03857	0.299004	0.564573	737.104	782.558	533.163	939.05	678.554	888.701
AT1G15140	737.517	-0.916376	0.287962	-3.18228	0.00146119	0.012688	1192.4	855.017	845.272	562.278	390.365	579.772
AT1G15150	1.19812	-3.34905	3.93446	-0.85121	0.394653	NA	0	0	7.18871	0	0	0
AT1G15160	124.911	1.97056	0.631841	3.11876	0.00181613	0.015	79.8189	22.1639	50.321	144.026	344.517	108.619
AT1G15165	72.4764	0.50604	0.691504	0.731796	0.464293	0.714523	40.724	80.9837	58.1087	95.6333	128.375	31.034
AT1G15170	175.887	0.190228	0.463347	0.410552	0.681401	0.856945	182.443	128.721	181.515	118.677	280.329	163.634
AT1G15175	90.0427	-0.136122	0.635253	-0.214279	0.830329	0.929215	91.2217	149.18	42.5332	57.6104	81.2169	118.494
AT1G15180	500.12	-0.143163	0.30219	-0.473752	0.635677	0.833435	586.425	596.722	391.785	415.947	479.442	530.4
AT1G15190	82.2856	1.47849	0.602164	2.4553	0.0140769	0.0742309	26.8778	52	51.5191	173.983	106.106	83.2276
AT1G15200	1689.77	0.80693	0.259028	3.11523	0.00183801	0.0151435	1611.85	1020.39	1055.54	2014.06	2509.86	1926.93
AT1G15210	0	NA	NA	NA	NA	NA	0	0	0	0	0	0
AT1G15215	104.741	-0.939767	0.578506	-1.62447	0.104275	0.296154	140.09	104	168.935	55.306	119.205	40.9085
AT1G15220	123.629	-0.926233	0.507705	-1.82435	0.0680987	0.223021	153.122	127.869	204.878	67.9803	124.445	63.4787
AT1G15230	402.467	-0.0801678	0.35467	-0.226035	0.821174	0.926343	320.09	436.459	484.639	498.906	416.564	258.147
AT1G15240	869.509	0.917942	0.254384	3.6085	0.000307978	0.0035342	705.339	560.918	539.752	1182.17	1265.41	963.465
AT1G15250	190.415	-0.661681	0.442571	-1.49508	0.134893	0.349171	227.24	242.098	230.638	112.916	226.621	102.977
AT1G15260	1063.9	0.0713974	0.361165	0.197687	0.84329	0.93438	1137.01	946.23	1029.18	572.647	1764.5	933.842
AT1G15270	1597.54	-0.0777993	0.208022	-0.373995	0.708408	0.871809	1580.09	1510.56	1830.72	1567	1535.26	1561.58
AT1G15280	962.348	1.04905	0.260732	4.02347	5.73e-05	0.000880451	682.533	599.279	599.658	1195.99	1640.06	1056.57
AT1G15290	970.161	0.0970238	0.332095	0.292157	0.770166	0.904598	1347.96	806.427	658.366	718.978	1269.34	1019.89
AT1G15300.1	28.7283	0.784284	1.35859	0.577278	0.563752	0.787677	51.3122	0	11.9812	17.2831	17.0293	74.7638
AT1G15310	12.4934	1.4573	1.92702	0.756246	0.449502	0.702448	0	17.0492	2.9953	0	37.9885	16.9276
AT1G15320	0.8733	3.66751	3.97188	0.923369	0.355815	NA	0	0	0	0	5.2398	0
AT1G15330	1.22737	3.02795	3.95894	0.76484	0.444367	NA	0.814479	0	0	0	6.54975	0
AT1G15340	1481.29	0.41019	0.229327	1.78867	0.0736682	0.234917	1170.41	1150.82	1494.65	1711.03	1862.75	1498.1
AT1G15350	728.453	0.566367	0.300656	1.88377	0.0595961	0.20404	518.009	524.263	719.47	1153.36	699.513	756.101
AT1G15360	0	NA	NA	NA	NA	NA	0	0	0	0	0	0
AT1G15370	1101.43	-0.220393	0.22321	-0.987381	0.323456	0.590193	1191.58	1213.9	1150.79	966.703	1147.52	938.074
AT1G15380	33.5559	-4.84062	1.22213	-3.96081	7.47e-05	0.00109028	79.8189	54.5574	59.9059	0	0	7.05319
AT1G15385	0	NA	NA	NA	NA	NA	0	0	0	0	0	0
AT1G15390	470.004	-1.17745	0.285011	-4.13124	3.61e-05	0.000598727	566.877	663.213	725.46	321.466	258.06	284.949
AT1G15400	1053.04	0.0554286	0.265979	0.208395	0.83492	0.930989	930.95	872.919	1293.97	1153.36	875.046	1191.99
AT1G15405	8.48209	-0.927503	1.831	-0.506555	0.612467	0.819609	13.0317	17.9016	2.39624	3.45662	0	14.1064
AT1G15410	184.028	-1.71575	0.543888	-3.1546	0.00160721	0.0136612	308.688	219.082	318.1	27.653	100.866	129.779
AT1G15415	6.87168	0.00809853	1.97028	0.00411034	0.99672	0.998854	3.25792	1.70492	15.5755	11.5221	9.16965	0
AT1G15420	232.734	0.133857	0.436908	0.306373	0.75932	0.899722	115.656	233.574	316.303	258.095	235.791	236.987
AT1G15430	1002.57	0.134934	0.26826	0.502997	0.614967	0.82105	732.217	1207.94	927.343	1170.64	941.854	1035.41
AT1G15440	61.1357	-0.934874	0.647687	-1.4434	0.148907	0.371093	114.842	58.8197	67.0946	34.5662	39.2985	52.1936
AT1G15450	0.576104	3.08434	4.0039	0.770333	0.441103	NA	0	0	0	3.45662	0	0
AT1G15460	5.63126	-1.55636	2.76743	-0.562385	0.573854	0.79396	25.2489	0	0	4.60883	3.92985	0
AT1G15470	228.861	-0.318695	0.377064	-0.845202	0.397998	0.660094	280.995	219.082	261.789	155.548	255.44	200.31
AT1G15480	27.5423	-0.257245	0.862797	-0.298152	0.765587	0.902157	32.5792	34.0984	23.3633	27.653	23.5791	23.9808
AT1G15490	97.9546	0.0534156	0.64245	0.0831436	0.933737	0.972984	34.2081	122.754	131.194	61.067	108.726	129.779
AT1G15500	848.474	-0.772031	0.290261	-2.65978	0.00781912	0.0471914	1356.11	1110.75	744.031	596.844	576.378	706.729
AT1G15510	25.7377	-3.69668	1.35975	-2.71864	0.00655504	0.0413864	48.0543	41.7705	53.3163	0	0	11.2851
AT1G15520	73.5842	0.0999043	0.636196	0.157034	0.875218	0.948708	70.0452	43.4754	99.4438	69.1325	110.036	49.3723
AT1G15530	15.9395	-0.818913	1.22421	-0.668933	0.503538	0.743673	19.5475	33.2459	8.38683	18.4353	11.7895	4.23191
AT1G15540	1.56284	-3.71898	3.92822	-0.946734	0.343774	NA	0	9.37705	0	0	0	0
AT1G15550	28.1597	-0.0938494	1.60131	-0.0586078	0.953265	0.980595	46.4253	40.9181	0	44.9361	36.6786	0
AT1G15560.1	0.192035	1.74702	4.08047	0.428142	0.668548	NA	0	0	0	1.15221	0	0
AT1G15570	70.0703	1.12727	0.602897	1.86976	0.0615172	0.208197	35.8371	49.4427	46.7266	82.959	134.925	70.5319
AT1G15580	311.469	1.54683	0.498667	3.10193	0.00192262	0.0156992	138.461	213.967	124.604	867.613	264.61	259.557
AT1G15590	0.135747	-0.176531	4.08047	-0.0432623	0.965492	NA	0.814479	0	0	0	0	0
AT1G15600	0	NA	NA	NA	NA	NA	0	0	0	0	0	0
AT1G15610	0	NA	NA	NA	NA	NA	0	0	0	0	0	0
AT1G15620	1.52827	4.47549	3.94409	1.13473	0.256488	NA	0	0	0	0	9.16965	0
AT1G15630	0	NA	NA	NA	NA	NA	0	0	0	0	0	0
AT1G15640	0	NA	NA	NA	NA	NA	0	0	0	0	0	0
AT1G15650	0	NA	NA	NA	NA	NA	0	0	0	0	0	0
AT1G15660	69.7528	0.371814	0.784475	0.473966	0.635524	0.83329	104.253	41.7705	36.5426	59.9148	150.644	25.3915
AT1G15670	166.589	-1.10107	0.820163	-1.3425	0.179433	0.416134	178.371	293.246	210.27	186.658	2.6199	128.368
AT1G15680	0	NA	NA	NA	NA	NA	0	0	0	0	0	0
AT1G15690	4558.83	-0.344893	0.19056	-1.8099	0.070312	0.227677	5224.88	5360.27	4718.79	4280.45	3576.16	4192.41
AT1G15700	146.781	-0.395878	0.443	-0.89363	0.37152	0.638384	187.33	178.164	134.788	93.3289	137.545	149.528
AT1G15710	217.441	-0.380122	0.378086	-1.00538	0.314712	0.581512	213.394	227.607	296.534	199.332	151.954	215.827
AT1G15720	70.0443	0.48499	0.791314	0.612892	0.539948	0.770468	113.213	21.3115	40.736	123.286	31.4388	90.2808
AT1G15730	997.006	-0.331534	0.238511	-1.39002	0.164524	0.394522	1004.25	1067.28	1261.62	992.051	797.759	859.078
AT1G15740	1576.82	0.230727	0.226157	1.02021	0.30763	0.573968	1298.28	1378.43	1675.57	1663.79	1522.16	1922.7
AT1G15750	504.113	0.481029	0.299223	1.60759	0.107925	0.302003	393.393	537.049	332.478	543.842	598.647	619.27
AT1G15757	0	NA	NA	NA	NA	NA	0	0	0	0	0	0
AT1G15760	0	NA	NA	NA	NA	NA	0	0	0	0	0	0
AT1G15770	2.91515	1.05181	3.79204	0.277372	0.781494	NA	5.70135	0	0	0	11.7895	0
AT1G15772	3.69457	-2.90122	3.55816	-0.815371	0.41486	NA	19.5475	0	0	0	2.6199	0
AT1G15780	133.812	0.820935	0.560749	1.464	0.143194	0.362386	70.0452	129.574	90.4579	111.764	104.796	296.234
AT1G15790	101.612	1.0174	0.520715	1.95385	0.0507187	0.183018	90.4072	43.4754	67.6937	148.635	129.685	129.779
AT1G15800	288.016	0.312588	0.334824	0.933589	0.350516	0.619077	220.724	262.558	287.548	376.772	284.259	296.234
AT1G15810	476.672	0.244381	0.356391	0.68571	0.492896	0.737183	460.181	430.492	418.143	288.052	670.694	592.468
AT1G15820	110428	-1.26167	0.186015	-6.78261	1.18e-11	1.32e-09	176123	133555	157887	66678.3	66553.3	61771.8
AT1G15825	1.62896	-3.78058	3.92732	-0.962635	0.335731	NA	9.77375	0	0	0	0	0
AT1G15830	8.96396	1.59099	1.75011	0.909079	0.363308	0.631475	3.25792	10.2295	0	10.3699	14.4094	15.517
AT1G15840	7.27331	2.76854	2.54095	1.08957	0.275904	0.539636	0	2.55738	2.9953	0	0	38.0872
AT1G15850	0	NA	NA	NA	NA	NA	0	0	0	0	0	0
AT1G15860	557.66	-0.195685	0.299922	-0.652452	0.51411	0.751842	519.638	652.984	614.035	593.387	592.097	373.819
AT1G15870	29.1776	0.459892	0.942344	0.48803	0.625529	0.827055	28.5068	23.0164	22.1652	16.1309	65.4975	19.7489
AT1G15880	1465.38	0.0985096	0.240669	0.409316	0.682308	0.857593	1435.11	1536.13	1274.8	1204.06	1811.66	1530.54
AT1G15885	320.995	1.95443	0.615849	3.17356	0.00150583	0.0130016	239.457	98.8853	56.9106	127.895	854.087	548.738
AT1G15890	294.217	0.298833	0.427872	0.698416	0.484917	0.731027	355.113	265.967	170.732	236.203	483.371	253.915
AT1G15900	49.2836	-0.229655	0.720371	-0.318801	0.749877	0.894716	39.095	40.0656	80.2739	38.0229	61.5676	36.6766
AT1G15910	187.386	0.692032	0.373767	1.85151	0.0640965	0.214075	137.647	161.115	131.194	220.072	234.481	239.808
AT1G15920	497.692	0.810659	0.307581	2.63559	0.008399	0.0500015	353.484	286.426	443.903	708.608	509.57	684.159
AT1G15930	2218.51	-1.69319	0.22818	-7.42041	1.17e-13	2.17e-11	4013.75	3189.05	2964.14	1065.79	893.386	1184.94
AT1G15940	156.944	0.259623	0.446161	0.581903	0.560632	0.785606	186.516	112.525	129.397	133.656	163.744	215.827
AT1G15950	387.341	-1.71638	0.293341	-5.85114	4.88e-09	2.73e-07	592.126	580.525	609.243	194.723	159.814	187.615
AT1G15960	38.9369	2.76	1.01205	2.72713	0.00638872	0.0405875	0.814479	11.082	17.9718	69.1325	102.176	32.4447
AT1G15970	371.038	0.07684	0.302374	0.254122	0.799401	0.91748	360	332.459	390.586	321.466	394.295	427.423
AT1G15980	747.032	-0.483826	0.277799	-1.74164	0.0815719	0.250767	920.361	791.935	900.386	491.993	577.688	799.831
AT1G15990	12.2778	-0.325947	1.94839	-0.167291	0.867141	0.944982	34.2081	6.81968	0	10.3699	22.2691	0
AT1G16000	184.995	-0.062748	0.47469	-0.132187	0.894836	0.957129	180.814	133.836	252.204	159.005	269.85	114.262
AT1G16010	754.731	0.160345	0.265372	0.604225	0.545694	0.774812	733.846	710.099	694.908	963.246	622.226	804.063
AT1G16020	261.642	-0.481929	0.39152	-1.23092	0.218354	0.468303	411.312	298.361	205.477	213.158	256.75	184.793
AT1G16022	0.235106	1.74702	4.08047	0.428142	0.668548	NA	0	0	0	0	0	1.41064
AT1G16025	0	NA	NA	NA	NA	NA	0	0	0	0	0	0
AT1G16030	35.266	-0.375727	0.822119	-0.457023	0.647655	0.839299	39.9095	28.1312	51.5191	46.0883	26.199	19.7489
AT1G16040	402.512	0.455769	0.348867	1.30643	0.191407	0.433174	381.991	293.246	342.662	318.009	440.143	639.019
AT1G16060	60.9808	-0.997201	0.768213	-1.29808	0.19426	0.436559	151.493	40.0656	52.1181	20.7397	56.3278	45.1404
AT1G16070	5.71745	-2.03044	2.39363	-0.848267	0.396289	0.659053	0	11.9344	15.5755	1.15221	0	5.64255
AT1G16080	1383.6	-0.499044	0.234706	-2.12625	0.0334824	0.13751	1687.6	1409.97	1764.23	1335.41	975.912	1128.51
AT1G16090	97.0468	0.0321079	0.670135	0.0479126	0.961786	0.983357	137.647	92.0656	58.1087	29.9574	137.545	126.957
AT1G16100	0	NA	NA	NA	NA	NA	0	0	0	0	0	0
AT1G16110	1162.03	0.132098	0.264925	0.498624	0.618045	0.822643	1396.83	1036.59	893.197	1008.18	1254.93	1382.42
AT1G16120	11.5205	-1.61493	2.19937	-0.73427	0.462784	0.713186	0	28.1312	23.9624	0	17.0293	0
AT1G16130	669.133	0.187918	0.350833	0.535634	0.592211	0.806625	566.877	674.295	635.602	517.341	1121.32	499.366
AT1G16140	12.8999	0.730984	1.58422	0.461415	0.644501	0.837512	0	6.81968	22.1652	9.21766	22.2691	16.9276
AT1G16150	30.9877	-2.65933	1.13094	-2.35143	0.0187015	0.0911436	89.5927	39.2131	31.7501	12.6743	0	12.6957
AT1G16160	2.92608	0.120062	3.78876	0.0316888	0.97472	NA	0	0	8.38683	0	9.16965	0
AT1G16170	774.996	-0.628711	0.260424	-2.41418	0.0157706	0.0805357	940.723	820.918	1061.53	587.626	523.98	715.193
AT1G16180	2854.17	-0.371607	0.2121	-1.75204	0.0797671	0.247628	2901.17	2994.69	3763.29	2765.3	2436.51	2264.07
AT1G16190	274.217	0.488776	0.398458	1.22667	0.219947	0.469967	167.783	223.344	292.94	271.921	244.961	444.351
AT1G16210	897.088	-0.805989	0.266397	-3.02552	0.00248205	0.0193862	1295.84	1107.34	1021.4	676.346	779.42	502.187
AT1G16220	99.0406	0.62011	0.720785	0.860326	0.389609	0.653559	88.7782	50.2951	95.2504	195.875	141.475	22.5702
AT1G16225	1.53628	4.49012	3.94372	1.13855	0.254891	NA	0	0	0	9.21766	0	0
AT1G16230	8.66801	2.54288	2.36558	1.07495	0.282397	0.54662	0	7.67214	0	0	28.8189	15.517
AT1G16240	2048.08	0.470587	0.260973	1.80321	0.071356	0.229985	1357.74	1835.35	1957.13	1739.83	2845.21	2553.25
AT1G16250	172.948	0.156574	0.53035	0.295228	0.76782	0.903413	225.611	161.967	103.637	303.031	99.5562	143.885
AT1G16260	550.662	0.352515	0.319193	1.10439	0.269423	0.53201	412.126	513.181	525.974	653.302	784.66	414.727
AT1G16270	148.432	-0.700178	0.504179	-1.38875	0.16491	0.395014	259.819	121.049	170.732	154.396	112.656	71.9425
AT1G16280	61.0113	-0.530792	0.635458	-0.83529	0.403554	0.664783	50.4977	80.1312	85.6654	46.0883	64.1875	39.4978
AT1G16290	0	NA	NA	NA	NA	NA	0	0	0	0	0	0
AT1G16300	82.2638	-1.1045	1.00051	-1.10394	0.269618	0.532151	165.339	63.082	108.43	62.2192	0	94.5127
AT1G16310	1.50316	0.839566	3.85002	0.218068	0.827376	NA	3.25792	0	0	5.76104	0	0
AT1G16320	1001.84	-1.35519	0.307591	-4.40581	1.05e-05	0.000208995	1438.37	1559.15	1323.32	339.901	601.267	749.048
AT1G16330	7.79398	-0.214246	1.61412	-0.132732	0.894405	0.956923	8.14479	8.52459	8.38683	1.15221	7.8597	12.6957
AT1G16340	63.7454	-0.296324	0.665458	-0.445293	0.656108	0.843743	107.511	52	51.5191	80.6546	48.4681	42.3191
AT1G16350	257.011	-1.48701	0.40477	-3.67373	0.000239037	0.0028776	377.104	464.59	295.336	147.483	172.913	84.6382
AT1G16360	94.5142	0.974423	0.723105	1.34755	0.177802	0.413686	24.4344	112.525	54.5144	208.55	47.1582	119.904
AT1G16370	2394.96	0.776098	0.342665	2.26489	0.0235194	0.107104	1014.84	2536.92	1746.26	4124.9	2004.22	2942.59
AT1G16380	56.0181	0.605353	0.750791	0.806287	0.420078	0.678924	72.4886	40.0656	20.9671	70.2847	95.6263	36.6766
AT1G16390	137.983	-1.7622	0.459158	-3.83789	0.000124094	0.00165854	159.638	269.377	210.27	55.306	64.1875	69.1212
AT1G16400	80.4462	1.5378	0.774752	1.98489	0.0471564	0.174031	42.3529	18.7541	62.3021	54.1538	251.51	53.6042
AT1G16410	1461.84	-0.903041	0.397145	-2.27383	0.0229761	0.105201	2872.67	821.771	2020.63	1057.73	1347.94	650.304
AT1G16420	36.2522	0.644605	1.27491	0.505608	0.613132	0.820007	71.6742	0	13.1793	25.3486	35.3686	71.9425
AT1G16430	92.3255	0.360733	0.626179	0.576086	0.564557	0.78799	67.6018	88.6558	86.2645	76.0457	186.013	49.3723
AT1G16440	2.68573	3.10097	3.87244	0.80078	0.423259	NA	0	1.70492	0	0	14.4094	0
AT1G16445	36.5232	-1.02779	0.964158	-1.066	0.286423	0.550844	76.561	62.2295	8.38683	32.2618	15.7194	23.9808
AT1G16450	0	NA	NA	NA	NA	NA	0	0	0	0	0	0
AT1G16460	1316.89	-0.656098	0.288089	-2.27741	0.0227615	0.104551	1752.76	1402.3	1678.56	805.393	1454.04	808.295
AT1G16470	409.314	-0.251948	0.376493	-0.669197	0.50337	0.743641	610.045	332.459	392.384	403.273	242.341	475.385
AT1G16480	8.37928	-4.31452	2.02279	-2.13295	0.0329285	0.13565	18.733	7.67214	21.5661	2.30442	0	0
AT1G16489	0.820719	3.58387	3.97573	0.901436	0.367356	NA	0	0	0	2.30442	2.6199	0
AT1G16490	11.7642	-0.525645	1.56028	-0.336891	0.736199	0.886151	17.1041	11.9344	12.5802	9.21766	0	19.7489
AT1G16500	31.7911	-1.74774	1.20448	-1.45103	0.146771	0.367988	15.4751	45.1804	86.2645	18.4353	0	25.3915
AT1G16510	98.9522	-2.27193	0.88958	-2.55393	0.0106514	0.0599772	136.018	129.574	225.845	8.06546	3.92985	90.2808
AT1G16515	40.9296	2.94597	0.988867	2.97914	0.00289059	0.0218564	18.733	8.52459	1.19812	118.677	40.6084	57.8361
AT1G16520	43.1819	0.202899	1.25368	0.161843	0.871429	0.946978	7.33031	29.8361	83.2692	87.5678	51.088	0
AT1G16530	2.40772	-4.34926	3.92064	-1.10932	0.26729	NA	0	4.2623	10.184	0	0	0
AT1G16540	129.071	0.278485	0.52586	0.52958	0.596403	0.809304	149.864	86.9509	113.222	137.113	208.282	78.9957
AT1G16550	19.3847	-0.527455	1.42698	-0.369629	0.711659	0.873111	57.828	8.52459	2.39624	26.5008	1.30995	19.7489
AT1G16560	399.246	-0.694485	0.348133	-1.99488	0.0460555	0.171414	491.945	441.574	547.54	434.382	233.171	246.861
AT1G16570	119.87	-0.805837	0.453136	-1.77836	0.0753451	0.238376	131.131	156.853	169.534	93.3289	85.1467	83.2276
AT1G16590	85.5976	0.869559	0.780789	1.11369	0.265411	0.527468	80.6334	88.6558	12.5802	95.6333	48.4681	187.615
AT1G16600	0	NA	NA	NA	NA	NA	0	0	0	0	0	0
AT1G16610	654.922	-0.499851	0.257773	-1.93912	0.052487	0.187017	715.113	809.837	776.38	463.188	552.799	612.216
AT1G16620.1	0	NA	NA	NA	NA	NA	0	0	0	0	0	0
AT1G16630	3.87627	1.71032	3.02139	0.566072	0.571345	NA	0	0	5.39153	3.45662	14.4094	0
AT1G16635	15.0147	-0.975912	1.25926	-0.774987	0.438347	0.693964	25.2489	17.0492	17.3727	2.30442	19.6492	8.46382
AT1G16640	7.34039	-0.0825477	2.22118	-0.0371639	0.970354	0.987484	0	3.40984	19.1699	0	14.4094	7.05319
AT1G16650	205.047	0.6958	0.394356	1.7644	0.0776651	0.243826	156.38	138.098	174.925	209.702	335.347	215.827
AT1G16660.1	0	NA	NA	NA	NA	NA	0	0	0	0	0	0
AT1G16670	288.452	0.597564	0.3913	1.52712	0.12673	0.335063	166.968	236.984	284.553	437.839	230.551	373.819
AT1G16680	82.7822	-0.0988425	0.610194	-0.161985	0.871317	0.946978	46.4253	106.557	103.637	51.8494	83.8368	104.387
AT1G16690	140.158	-0.0257328	0.620155	-0.0414942	0.966902	0.985657	242.715	132.131	49.7219	146.33	193.873	76.1744
AT1G16700	833.66	-0.0121612	0.281739	-0.0431648	0.96557	0.984961	622.262	879.738	1008.82	725.891	782.04	983.214
AT1G16705	26.6223	0.25913	1.02338	0.25321	0.800106	0.917742	49.6832	15.3443	7.78777	33.414	19.6492	33.8553
AT1G16710	265.063	1.12306	0.453997	2.47372	0.0133714	0.0714066	197.918	217.377	85.6654	306.487	513.5	269.432
AT1G16720	1351.04	-1.00798	0.242663	-4.15382	3.27e-05	0.00054936	1800.81	1830.23	1782.2	717.826	859.327	1115.81
AT1G16730	209.632	-0.795684	0.44613	-1.78352	0.0745011	0.236561	385.249	199.476	213.265	111.764	206.972	141.064
AT1G16740	482.831	-0.404184	0.283965	-1.42336	0.154633	0.37952	557.104	525.115	567.908	403.273	495.161	348.427
AT1G16750	142.967	0.306394	0.481181	0.636755	0.524284	0.760299	153.122	114.23	116.217	125.591	235.791	112.851
AT1G16760	2.41024	-1.28061	3.82999	-0.334363	0.738106	NA	0	10.2295	0	0	0	4.23191
AT1G16770	24.4912	8.48043	1.65634	5.11998	3.06e-07	9.69e-06	0	0	0	91.0244	24.889	31.034
AT1G16780	194.697	-0.856676	0.51726	-1.65618	0.0976853	0.283602	425.973	198.623	128.199	160.157	93.0064	162.223
AT1G16790	46.9791	-0.173397	0.888582	-0.195139	0.845284	0.935429	60.2714	50.2951	38.9388	41.4795	83.8368	7.05319
AT1G16800	30.7163	1.34728	0.922851	1.45991	0.144314	0.364323	22.8054	5.11476	23.9624	50.6972	37.9885	43.7297
AT1G16810	745.843	-0.351245	0.251125	-1.39869	0.161906	0.390703	935.836	779.148	793.753	639.475	741.431	585.414
AT1G16820	211.045	0.649286	0.42438	1.52997	0.126025	0.333859	195.475	196.066	101.84	258.095	203.042	311.751
AT1G16825	150.692	-0.21279	0.543176	-0.391752	0.695242	0.864648	184.887	128.721	171.93	221.224	56.3278	141.064
AT1G16830	8.24819	-0.129878	1.84765	-0.0702936	0.94396	0.976815	10.5882	15.3443	0	12.6743	5.2398	5.64255
AT1G16840	657.438	-0.0261793	0.325662	-0.0803879	0.935929	0.973873	534.298	797.902	658.366	852.634	425.734	675.695
AT1G16850	515.839	2.22162	0.447286	4.96689	6.8e-07	1.93e-05	139.276	225.902	181.515	1469.07	713.922	365.355
AT1G16858	0	NA	NA	NA	NA	NA	0	0	0	0	0	0
AT1G16860	0	NA	NA	NA	NA	NA	0	0	0	0	0	0
AT1G16870	165.739	-0.808897	0.438248	-1.84575	0.0649286	0.216333	214.208	265.115	153.958	111.764	150.644	98.7446
AT1G16880	7677.02	-0.974563	0.183203	-5.31957	1.04e-07	3.81e-06	10930.3	9700.99	9895.26	4764.38	5125.83	5645.37
AT1G16890	2559.12	0.0346639	0.229063	0.151329	0.879716	0.950299	2090.77	2735.54	2758.07	2113.15	2745.65	2911.55
AT1G16900	122.667	-0.157607	0.675519	-0.233313	0.815518	0.923838	93.6651	208	86.8636	205.093	111.346	31.034
AT1G16905	0	NA	NA	NA	NA	NA	0	0	0	0	0	0
AT1G16910	0.334111	0.78525	4.08047	0.192441	0.847397	NA	0	0.852459	0	1.15221	0	0
AT1G16916	209.594	1.27449	0.386994	3.29331	0.000990159	0.00921402	123.801	102.295	141.378	290.356	235.791	363.944
AT1G16920	388.117	-0.929588	0.340266	-2.73195	0.00629612	0.040193	425.973	445.836	655.371	335.293	247.58	218.649
AT1G16930	97.5811	0.39423	0.551302	0.715088	0.474555	0.723431	57.0135	104.853	91.057	115.221	72.0472	145.296
AT1G16940	0.40724	-1.77336	3.98865	-0.4446	0.656609	NA	2.44344	0	0	0	0	0
AT1G16950	0.678733	-2.51409	3.95601	-0.635513	0.525094	NA	4.0724	0	0	0	0	0
AT1G16960	17.7377	-2.51593	1.55311	-1.61993	0.105247	0.297822	4.88687	11.9344	73.6843	0	13.0995	2.82127
AT1G16970	140.854	0.369783	0.51578	0.71694	0.473411	0.722609	107.511	132.131	128.798	118.677	95.6263	262.378
AT1G16980	2.85068	-4.58901	3.91852	-1.17111	0.241555	NA	17.1041	0	0	0	0	0
AT1G17000	0	NA	NA	NA	NA	NA	0	0	0	0	0	0
AT1G17010	0	NA	NA	NA	NA	NA	0	0	0	0	0	0
AT1G17020	55.8338	-1.7007	2.67532	-0.635698	0.524973	0.760423	205.249	0	50.92	19.5875	0	59.2468
AT1G17030	0	NA	NA	NA	NA	NA	0	0	0	0	0	0
AT1G17040	113.235	0.377061	0.544364	0.692663	0.488521	0.733583	72.4886	121.049	101.84	66.8281	167.674	149.528
AT1G17050	584.001	-0.396392	0.353301	-1.12197	0.261877	0.522992	779.456	476.525	734.446	313.401	517.43	682.748
AT1G17060	202.632	2.09726	0.561679	3.73392	0.000188521	0.00236715	65.9728	110.82	53.9153	578.408	123.135	283.538
AT1G17070	74.1767	-1.2073	0.683245	-1.76701	0.0772266	0.242726	129.502	118.492	62.9012	62.2192	55.0179	16.9276
AT1G17080	1191.53	0.179522	0.278556	0.644475	0.519267	0.755724	857.646	1011.87	1482.07	1240.93	1075.47	1481.17
AT1G17090	29.1341	-2.3775	1.25448	-1.89521	0.0580648	0.200571	48.8687	27.2787	70.689	25.3486	2.6199	0
AT1G17100	1073.59	-0.412541	0.264331	-1.5607	0.118595	0.320801	1527.96	1066.43	1083.7	897.57	775.49	1090.42
AT1G17110	681.412	0.946233	0.249121	3.79829	0.000145701	0.0019068	406.425	493.574	496.62	852.634	902.555	936.663
AT1G17120	322.712	-0.652868	0.327861	-1.99129	0.0464488	0.172336	424.344	447.541	312.11	277.682	248.89	225.702
AT1G17130	394.18	0.320601	0.304004	1.0546	0.29161	0.557109	326.606	361.443	363.629	414.795	531.839	366.766
AT1G17140	734.997	0.319759	0.273871	1.16755	0.242987	0.499626	817.737	528.525	615.234	724.739	863.257	860.489
AT1G17145	815.74	1.43737	0.288123	4.98874	6.08e-07	1.76e-05	315.203	507.213	497.219	1142.99	1414.75	1017.07
AT1G17147	694.435	0.810841	0.442231	1.83352	0.0667246	0.220133	172.67	734.82	605.05	622.192	1057.13	974.75
AT1G17150	0	NA	NA	NA	NA	NA	0	0	0	0	0	0
AT1G17160	399.846	0.0527694	0.312334	0.168952	0.865835	0.944627	373.031	395.541	409.157	415.947	496.471	308.93
AT1G17170	112.207	-3.06055	0.764311	-4.00432	6.22e-05	0.000938437	302.986	53.7049	244.416	28.8052	5.2398	38.0872
AT1G17180	8.2063	-6.11787	2.6032	-2.35014	0.0187666	0.0913723	16.2896	0	32.9482	0	0	0
AT1G17190	105.455	-0.171484	0.594092	-0.288648	0.77285	0.90598	90.4072	66.4918	177.921	104.851	57.6378	135.421
AT1G17200	1889.89	0.193044	0.28254	0.683244	0.494453	0.737703	1904.25	1330.69	2055.37	1563.55	2739.1	1746.37
AT1G17210	458.398	-0.129343	0.292688	-0.441916	0.65855	0.845148	443.077	577.115	416.945	432.078	483.371	397.8
AT1G17220	797.602	-0.492596	0.250099	-1.9696	0.0488838	0.17847	1074.3	895.082	827.9	603.757	651.045	733.531
AT1G17230	79.4955	0.150281	0.66792	0.224999	0.82198	0.926343	77.3755	42.623	106.033	99.0899	116.586	35.2659
AT1G17232	0	NA	NA	NA	NA	NA	0	0	0	0	0	0
AT1G17235	5.10391	4.12403	2.76131	1.49351	0.135304	0.349872	0	1.70492	0	0	9.16965	19.7489
AT1G17240	2.78564	5.34254	3.76227	1.42003	0.155598	NA	0	0	0	2.30442	14.4094	0
AT1G17250	0	NA	NA	NA	NA	NA	0	0	0	0	0	0
AT1G17255	11.408	-3.6281	1.79637	-2.01968	0.0434161	0.164387	0.814479	34.9508	27.5567	2.30442	0	2.82127
AT1G17260	14.0886	-0.412646	1.55626	-0.265153	0.790892	0.913484	3.25792	20.459	24.5614	12.6743	23.5791	0
AT1G17270	70.5691	0.355551	0.887595	0.400578	0.688731	0.86147	63.5294	117.639	4.79247	78.3501	58.9477	100.155
AT1G17275.1	0	NA	NA	NA	NA	NA	0	0	0	0	0	0
AT1G17277.1	2.63426	-4.47794	3.817	-1.17316	0.240733	NA	0	6.81968	8.98589	0	0	0
AT1G17280	1019.51	-0.164276	0.240364	-0.683447	0.494324	0.737703	1061.27	1084.33	1086.69	835.351	1159.31	890.112
AT1G17285	0	NA	NA	NA	NA	NA	0	0	0	0	0	0
AT1G17290	5905.21	0.319815	0.293873	1.08828	0.276472	0.540275	3731.13	7258.69	4770.91	8650.78	4645.08	6374.67
AT1G17300	57.1745	0.290566	0.760115	0.382266	0.702264	0.867827	22.8054	77.5738	53.9153	40.3273	106.106	42.3191
AT1G17310	11.321	0.239938	1.65558	0.144927	0.884769	0.952486	2.44344	11.9344	16.7737	18.4353	18.3393	0
AT1G17330	334.585	0.109072	0.345543	0.315654	0.752265	0.896261	333.122	313.705	319.298	389.446	419.184	232.755
AT1G17340	1086.58	1.23497	0.440053	2.80642	0.00500951	0.0337336	693.122	682.82	568.507	2923.15	605.197	1046.69
AT1G17345	5.21534	-5.46029	3.02795	-1.80329	0.0713421	0.229977	23.6199	7.67214	0	0	0	0
AT1G17350	300.855	-0.16366	0.420518	-0.389186	0.697138	0.86565	184.887	444.131	324.69	235.05	386.435	229.934
AT1G17360	962.759	0.356661	0.250249	1.42522	0.154092	0.379078	950.497	836.263	747.027	1261.67	1075.47	905.629
AT1G17370	1809.36	0.214283	0.212132	1.01014	0.312428	0.579055	1586.61	1716	1723.49	2239.89	1833.93	1756.24
AT1G17380	4768.02	0.625407	0.281805	2.21929	0.0264668	0.116468	2783.07	3674.95	4793.07	7771.64	4127.65	5457.75
AT1G17390.1	4.36166	2.05854	2.94212	0.69968	0.484127	0.730671	0	5.11476	0	18.4353	2.6199	0
AT1G17400	2.59592	-4.45971	3.91962	-1.13779	0.255208	NA	0	0	15.5755	0	0	0
AT1G17410	429.08	0.63222	0.32795	1.92779	0.0538811	0.1903	304.615	369.967	335.473	693.629	489.921	380.872
AT1G17420	6945.7	0.901475	0.292713	3.07972	0.00207195	0.016675	3349.95	6004.72	5176.47	12235.3	6017.91	8889.83
AT1G17430	56.4858	0.514761	0.768714	0.66964	0.503087	0.743312	27.6923	56.2623	55.7125	125.591	32.7487	40.9085
AT1G17440	383.721	1.57041	0.448613	3.50058	0.000464246	0.00496191	96.1085	218.23	265.383	863.004	360.236	499.366
AT1G17450	25.3173	0.251255	1.28415	0.19566	0.844877	0.935236	32.5792	17.0492	19.7689	47.2405	0	35.2659
AT1G17455	62.122	0.457066	0.810868	0.563675	0.572976	0.79329	48.0543	78.4263	30.552	23.0442	44.5383	148.117
AT1G17460	14.2593	0.059959	1.6836	0.0356136	0.97159	0.987947	5.70135	2.55738	33.5473	5.76104	37.9885	0
AT1G17470	487.957	-0.667797	0.355079	-1.8807	0.0600124	0.204725	713.484	614.623	468.464	342.206	251.51	537.453
AT1G17480	15.2077	1.63468	1.78948	0.913495	0.360982	0.629514	0	10.2295	11.9812	50.6972	0	18.3383
AT1G17490	182.082	0.409904	0.501709	0.817015	0.41392	0.673282	123.801	121.902	222.85	119.83	176.843	327.268
AT1G17495.1	0	NA	NA	NA	NA	NA	0	0	0	0	0	0
AT1G17500	95.0461	-0.0292157	0.635263	-0.0459899	0.963318	0.984065	103.439	128.721	56.3115	155.548	82.5268	43.7297
AT1G17510	176.72	0.201582	0.44289	0.455153	0.648999	0.84002	121.357	157.705	213.864	212.006	129.685	225.702
AT1G17520	499.277	0.627585	0.280172	2.24	0.0250912	0.111832	353.484	460.328	363.629	626.801	649.735	541.685
AT1G17530	209.848	0.696187	0.384645	1.80995	0.0703041	0.227677	140.09	172.197	168.336	322.618	199.112	256.736
AT1G17540	0	NA	NA	NA	NA	NA	0	0	0	0	0	0
AT1G17545	1.49321	-3.65482	3.92919	-0.930171	0.352282	NA	8.95927	0	0	0	0	0
AT1G17550	362.309	1.55377	0.352568	4.40702	1.05e-05	0.000208032	224.796	144.918	182.713	706.304	408.704	506.419
AT1G17560	57.2782	-0.031084	0.860499	-0.0361232	0.971184	0.987887	31.7647	86.0984	55.7125	42.6317	11.7895	115.672
AT1G17570	0	NA	NA	NA	NA	NA	0	0	0	0	0	0
AT1G17580	140.104	0.295972	0.437016	0.677256	0.498244	0.739958	157.194	112.525	107.831	173.983	148.024	141.064
AT1G17590	120.041	0.604938	0.575852	1.05051	0.293484	0.559133	64.3438	108.262	113.222	207.397	166.364	60.6574
AT1G17600	76.942	1.29016	0.57524	2.24282	0.0249084	0.111363	49.6832	40.0656	44.3304	142.874	111.346	73.3531
AT1G17610	65.2087	0.0492735	1.08755	0.0453068	0.963863	0.984304	70.8597	39.2131	82.0711	0	125.755	73.3531
AT1G17615	0	NA	NA	NA	NA	NA	0	0	0	0	0	0
AT1G17620	1468.15	0.841196	0.812187	1.03572	0.300334	0.565705	497.647	1380.13	1277.79	2795.26	457.172	2400.9
AT1G17630	4.00693	0.866027	3.44527	0.251367	0.80153	0.918254	0	8.52459	0	0	0	15.517
AT1G17640	113.888	-0.352475	0.611773	-0.576154	0.564511	0.78799	160.452	124.459	98.2457	44.9361	184.703	70.5319
AT1G17650	242.322	-1.02176	0.429542	-2.37871	0.0173732	0.0862362	491.945	231.869	250.407	171.679	121.825	186.204
AT1G17660	0	NA	NA	NA	NA	NA	0	0	0	0	0	0
AT1G17665	0	NA	NA	NA	NA	NA	0	0	0	0	0	0
AT1G17670	0	NA	NA	NA	NA	NA	0	0	0	0	0	0
AT1G17680	257.159	0.216108	0.399668	0.540718	0.588702	0.804112	232.941	195.213	285.751	359.489	296.049	173.508
AT1G17690	96.0119	-0.161791	0.764318	-0.21168	0.832357	0.930108	100.181	179.869	24.5614	167.07	55.0179	49.3723
AT1G17700	42.3334	0.509337	0.825308	0.617148	0.537137	0.769063	52.9411	27.2787	24.5614	36.8707	24.889	87.4595
AT1G17710	20.7927	-2.93897	1.7391	-1.68994	0.0910394	0.270391	93.6651	1.70492	14.9765	0	14.4094	0
AT1G17720	1017.29	2.3011	0.314749	7.31091	2.65e-13	4.49e-11	376.289	425.377	228.841	1433.35	2251.8	1388.07
AT1G17730	801.926	0.801569	0.239726	3.34369	0.00082673	0.00793913	582.353	634.23	537.955	1030.07	1102.98	923.967
AT1G17744	0.218325	1.74702	4.08047	0.428142	0.668548	NA	0	0	0	0	1.30995	0
AT1G17745	307.731	-1.0748	0.525708	-2.04448	0.0409058	0.157554	595.384	191.803	464.87	172.831	334.037	87.4595
AT1G17750	64.292	-0.41699	0.66284	-0.629096	0.529286	0.763525	61.9004	80.1312	78.4767	36.8707	91.6965	36.6766
AT1G17760	238.393	0.308785	0.416324	0.741692	0.458274	0.70947	173.484	253.18	212.666	390.599	204.352	196.079
AT1G17770	0.135747	-0.176531	4.08047	-0.0432623	0.965492	NA	0.814479	0	0	0	0	0
AT1G17780	303.225	0.522132	0.380975	1.37051	0.170526	0.40262	329.05	175.607	242.02	343.358	275.089	454.225
AT1G17790	191.073	0.659384	0.40548	1.62618	0.103911	0.29537	136.832	125.312	182.114	279.987	178.153	244.04
AT1G17800	0.8733	3.66751	3.97188	0.923369	0.355815	NA	0	0	0	0	5.2398	0
AT1G17810	1.37811	0.448835	3.85781	0.116344	0.90738	NA	0	1.70492	1.79718	3.45662	1.30995	0
AT1G17820	90.4804	0.0501537	0.526339	0.0952879	0.924086	0.968849	80.6334	69.0492	116.817	89.8722	87.7666	98.7446
AT1G17830	169.611	0.00811017	0.496955	0.0163197	0.986979	0.995187	97.7375	237.836	171.93	212.006	103.486	194.668
AT1G17840	991.42	0.202287	0.296729	0.681724	0.495413	0.738588	686.606	1016.98	1062.73	1412.61	854.087	915.503
AT1G17850	117.053	0.11483	0.558888	0.205462	0.837211	0.932692	65.9728	142.361	128.798	93.3289	188.633	83.2276
AT1G17860	188.824	-1.14481	0.443517	-2.58121	0.00984536	0.0566187	239.457	269.377	271.374	147.483	64.1875	141.064
AT1G17870	124.75	0.0514067	0.482409	0.106562	0.915136	0.964836	84.7058	167.935	115.019	131.352	112.656	136.832
AT1G17880	3263.26	-0.592855	0.239432	-2.47609	0.0132829	0.0710494	4562.71	3706.49	3504.5	2907.02	1930.87	2967.98
AT1G17890	304.772	-0.779711	0.406834	-1.91653	0.0552974	0.194177	413.755	443.279	298.93	304.183	124.445	244.04
AT1G17900.1	0	NA	NA	NA	NA	NA	0	0	0	0	0	0
AT1G17910	2.37732	-4.32601	3.92086	-1.10333	0.269884	NA	4.88687	9.37705	0	0	0	0
AT1G17920	49.0416	0.714066	0.79729	0.895617	0.370458	0.637477	27.6923	24.7213	58.7078	27.653	51.088	104.387
AT1G17930	114.766	0.554653	0.516455	1.07396	0.28284	0.547035	97.7375	124.459	56.9106	108.308	137.545	163.634
AT1G17940	325.379	1.13234	0.579126	1.95525	0.0505535	0.182781	197.918	173.049	240.822	983.986	188.633	167.866
AT1G17950	0	NA	NA	NA	NA	NA	0	0	0	0	0	0
AT1G17960	2.29639	-4.28338	3.92129	-1.09234	0.274684	NA	0	0	13.7784	0	0	0
AT1G17970	635.948	0.196071	0.283204	0.69233	0.48873	0.73376	461.81	685.377	631.408	757.001	707.373	572.719
AT1G17980	1298.99	1.22841	0.244039	5.03366	4.81e-07	1.43e-05	667.873	818.361	844.673	1749.05	1526.09	2187.9
AT1G17990	10.7411	2.08532	1.44993	1.43822	0.150371	0.373019	2.44344	2.55738	7.18871	6.91325	34.0587	11.2851
AT1G18000	2.65666	1.52983	2.44075	0.626787	0.530799	NA	0.814479	0.852459	2.39624	2.30442	3.92985	5.64255
AT1G18010	5.25356	2.67506	2.08641	1.28213	0.199796	0.443922	2.44344	0	1.79718	4.60883	17.0293	5.64255
AT1G18020	159.327	2.81078	0.456491	6.15737	7.4e-10	4.95e-08	31.7647	41.7705	45.5285	218.92	383.815	234.166
AT1G18030	664.796	1.21384	0.274212	4.42663	9.57e-06	0.000193043	359.185	382.754	459.478	1130.32	813.479	843.561
AT1G18040	122.13	-0.574455	0.494046	-1.16276	0.244928	0.502438	184.072	128.721	125.802	104.851	124.445	64.8893
AT1G18050	0	NA	NA	NA	NA	NA	0	0	0	0	0	0
AT1G18060	3850.3	-0.847908	0.227194	-3.73209	0.000189895	0.00238292	5606.87	4384.2	4859.57	2375.85	3432.07	2443.22
AT1G18070	1354.85	0.717498	0.259837	2.76134	0.0057565	0.0375825	1063.71	1201.12	809.928	1757.12	1332.22	1965.02
AT1G18075	3.51332	0.213841	2.2175	0.0964333	0.923176	NA	0.814479	5.96722	2.9953	5.76104	1.30995	4.23191
AT1G18080	1085.64	-1.68755	0.248067	-6.80281	1.03e-11	1.19e-09	1956.38	1348.59	1665.98	566.886	479.442	496.544
AT1G18090	41.2211	0.654105	1.2079	0.541524	0.588147	0.804027	59.457	0	36.5426	20.7397	44.5383	86.0489
AT1G18100	1.49321	-3.65482	3.92919	-0.930171	0.352282	NA	8.95927	0	0	0	0	0
AT1G18120	0	NA	NA	NA	NA	NA	0	0	0	0	0	0
AT1G18130	5.56561	-5.55471	3.43544	-1.61689	0.105903	0.298636	33.3936	0	0	0	0	0
AT1G18140	6.38009	-5.75179	3.2971	-1.7445	0.0810717	0.250009	38.2805	0	0	0	0	0
AT1G18150	324.825	-0.0784986	0.34859	-0.225189	0.821832	0.926343	343.71	236.984	419.94	337.597	276.399	334.321
AT1G18160	699.888	1.05268	0.272217	3.86708	0.000110145	0.00150701	419.457	559.213	387.591	869.917	886.836	1076.32
AT1G18170	679.629	-0.854707	0.276785	-3.08798	0.00201519	0.0162964	851.945	785.115	988.447	516.189	374.646	561.434
AT1G18180	36.7982	-1.92441	1.16386	-1.65347	0.098236	0.28479	117.285	24.7213	32.9482	28.8052	17.0293	0
AT1G18190	164.438	0.352603	0.432627	0.815027	0.415057	0.674438	96.1085	173.049	164.142	205.093	167.674	180.562
AT1G18191	20.1544	0.703903	3.73435	0.188494	0.850489	0.937494	0	46.0328	0	74.8935	0	0
AT1G18200	806.188	1.47634	0.296985	4.9711	6.66e-07	1.9e-05	334.751	499.541	444.502	1019.7	1566.7	971.929
AT1G18210	3457.21	0.585209	0.294308	1.98842	0.0467651	0.173095	1892.03	3159.21	3245.1	5195.31	2703.74	4547.89
AT1G18220	0	NA	NA	NA	NA	NA	0	0	0	0	0	0
AT1G18230	0.384069	2.50592	4.05092	0.618605	0.536177	NA	0	0	0	2.30442	0	0
AT1G18240.1	0.235106	1.74702	4.08047	0.428142	0.668548	NA	0	0	0	0	0	1.41064
AT1G18250	13.9187	-1.23779	1.83374	-0.675008	0.49967	0.74094	33.3936	4.2623	20.9671	0	24.889	0
AT1G18260	220.782	-0.714533	0.416446	-1.71579	0.0862011	0.260558	180.814	353.771	288.746	192.419	183.393	125.547
AT1G18265	61.5407	0.582679	0.732781	0.795162	0.426519	0.684116	59.457	26.4262	61.7031	47.2405	43.2283	131.189
AT1G18270	609.068	0.586543	0.346075	1.69485	0.0901047	0.26843	443.077	685.377	333.077	895.266	534.459	763.155
AT1G18280	0.142077	-0.176531	4.08047	-0.0432623	0.965492	NA	0	0.852459	0	0	0	0
AT1G18290	20.3378	0.854129	1.12552	0.758878	0.447925	0.701243	9.77375	24.7213	8.98589	17.2831	10.4796	50.7829
AT1G18300	2841.15	-0.0724135	0.273029	-0.265223	0.790838	0.913484	3087.69	3055.21	2593.93	2226.07	2111.64	3972.35
AT1G18310	31.7465	0.493367	1.09912	0.448875	0.653522	0.842432	34.2081	42.623	2.39624	16.1309	65.4975	29.6234
AT1G18320	12.0754	-0.58306	1.33861	-0.435572	0.663147	0.847639	5.70135	17.9016	19.7689	6.91325	5.2398	16.9276
AT1G18330	163.408	-0.726632	0.429892	-1.69027	0.0909768	0.270285	261.448	177.312	172.529	120.982	148.024	100.155
AT1G18335	291.747	0.454592	0.432929	1.05004	0.293701	0.559388	206.063	317.967	214.463	199.332	530.53	282.127
AT1G18340	213.45	0.70914	0.391735	1.81026	0.0702562	0.227606	167.783	179.869	138.383	202.789	246.271	345.606
AT1G18350	0.8733	3.66751	3.97188	0.923369	0.355815	NA	0	0	0	0	5.2398	0
AT1G18360	406.716	0.167519	0.362465	0.462165	0.643963	0.837264	359.185	312	477.45	320.314	356.306	615.038
AT1G18370	0.8733	3.66751	3.97188	0.923369	0.355815	NA	0	0	0	0	5.2398	0
AT1G18382	5.01186	0.9152	1.96047	0.466827	0.640624	0.835765	8.14479	1.70492	0.599059	4.60883	6.54975	8.46382
AT1G18390	609.878	0.182886	0.347293	0.526604	0.598469	0.810686	377.104	797.05	539.752	533.472	846.227	565.665
AT1G18400	205.246	-0.511259	0.473274	-1.08026	0.280026	0.544366	356.742	227.607	139.581	140.569	235.791	131.189
AT1G18410	13.8781	1.2554	1.87681	0.668901	0.503558	0.743673	3.25792	0.852459	20.368	1.15221	57.6378	0
AT1G18415	9.73808	0.26951	1.40043	0.192449	0.847391	0.936387	13.8461	4.2623	8.38683	10.3699	13.0995	8.46382
AT1G18420	0	NA	NA	NA	NA	NA	0	0	0	0	0	0
AT1G18430	0	NA	NA	NA	NA	NA	0	0	0	0	0	0
AT1G18440	199.088	-0.123349	0.47078	-0.262009	0.793314	0.914784	144.163	285.574	193.496	279.987	174.223	117.083
AT1G18450	767.442	0.0416753	0.269866	0.15443	0.877271	0.94939	790.045	792.787	685.923	615.279	757.151	963.465
AT1G18460	2007.87	1.39648	0.374884	3.7251	0.000195239	0.00243782	1061.27	1207.94	1047.75	5182.63	1524.78	2022.85
AT1G18470	1422.88	0.864599	0.353442	2.44623	0.014436	0.0755507	477.285	1244.59	1304.15	1842.38	1434.39	2234.45
[truncated: 31,611 more rows]
