# Supplementary material for: Companion cells with high florigen production express other small proteins and reveal a nitrogen-sensitive FT repressor
Source: bioRxiv preprint, doi:10.1101/2024.08.17.608367, version 2 (2025-08-08)
Supplement: Supplemental data 6 [file 608367_file08.xlsx]

## Sheet: DataS6_35Sc_v_CABt
Row.names	baseMean	log2FoldChange	lfcSE	stat	pvalue	padj	35S_T1.counts	35S_T2.counts	35S_T3.counts	CAB2_T1.counts	CAB2_T2.counts	CAB2_T3.counts
AT1G01010	37.3886	0.444084	1.06485	0.41704	0.676649	0.932972	19.6208	16.2867	58.7867	85.1018	34.3439	10.1918
AT1G01020	834.19	0.36131	0.291441	1.23974	0.215073	0.689748	667.926	808.336	713.925	1170.52	894.314	750.113
AT1G01030	358.532	2.34295	0.417308	5.61443	1.97e-08	1.42e-05	121.813	81.4337	150.3	816.678	550.876	430.092
AT1G01040	263.368	0.196702	0.417165	0.471521	0.637269	0.921174	329.467	203.156	203.632	256.798	355.802	231.353
AT1G01046	0	NA	NA	NA	NA	NA	0	0	0	0	0	0
AT1G01050	2108.26	-0.0300113	0.256778	-0.116876	0.906958	0.987746	2680.7	1924.41	1785.42	2287.3	2009.8	1961.91
AT1G01060	119.849	-1.14161	0.589992	-1.93496	0.0529946	0.394266	251.801	135.437	107.271	101.525	70.0615	52.9971
AT1G01070	2.72722	-4.53947	3.91908	-1.1583	0.246742	NA	0	0	16.3633	0	0	0
AT1G01073	0.339725	2.36327	4.06193	0.581809	0.560695	NA	0	0	0	0	0	2.03835
AT1G01080	631.089	-0.15461	0.393359	-0.393052	0.694281	0.939233	852.689	550.32	592.716	409.086	476.693	905.028
AT1G01090	2141.07	-0.376082	0.28515	-1.31889	0.187205	0.659882	2714.22	2271.57	2270.26	2202.19	1265.23	2122.94
AT1G01100	1983.13	0.203654	0.276197	0.73735	0.460909	0.856075	2121.5	1726.39	1681.79	2768.05	1726.81	1874.26
AT1G01110	31.9284	-0.28221	1.13745	-0.248108	0.804051	0.965367	11.4455	29.1447	64.2412	41.8044	39.8389	5.09588
AT1G01115	0.142866	-0.19541	4.08047	-0.047889	0.961805	NA	0	0.857197	0	0	0	0
AT1G01120	1052.89	0.331744	0.459888	0.721358	0.470689	0.861412	514.229	918.058	1364.22	1824.46	578.351	1118.04
AT1G01130	410.819	0.784563	0.507019	1.5474	0.121766	0.564861	401.41	199.727	303.63	819.664	523.4	217.084
AT1G01140	5189.39	0.39887	0.197948	2.01502	0.0439022	0.361831	4677.12	4609.15	4144.16	5749.59	5659.87	6296.47
AT1G01150	13.6182	-0.964352	2.18475	-0.441403	0.658922	0.926414	48.2346	1.71439	4.24234	0	0	27.5177
AT1G01160	683.886	-0.403888	0.339612	-1.18926	0.234337	0.708815	781.563	834.91	721.804	459.848	468.45	836.743
AT1G01170	1575.42	0.228025	0.29019	0.785776	0.431999	0.842233	1817.38	1248.94	1286.64	2129.04	1601.8	1368.75
AT1G01180	190.611	-0.375828	0.563689	-0.666728	0.504946	0.87607	112.002	243.444	290.297	100.032	258.266	139.627
AT1G01183	2.12844	-4.18016	3.92256	-1.06567	0.286572	NA	0	4.28598	8.48468	0	0	0
AT1G01190	12.0268	-1.36267	2.14211	-0.636132	0.52469	0.882697	0	20.5727	31.5145	0	2.74751	17.326
AT1G01200	15.2406	1.05223	2.04363	0.514883	0.606635	0.913332	22.891	6.85757	0	32.8463	28.8488	0
AT1G01210	206.449	0.547664	0.419275	1.30622	0.191479	0.663732	147.974	189.44	165.451	276.207	280.246	179.375
AT1G01220	235.366	-0.111166	0.411545	-0.27012	0.787068	0.962038	272.239	246.015	215.147	276.207	157.982	244.602
AT1G01225	94.4164	0.307778	0.763324	0.403208	0.686795	0.936996	121.813	70.2901	61.2109	26.8742	181.336	104.975
AT1G01230	775.186	0.195772	0.3564	0.549305	0.582796	0.906478	516.682	846.91	803.621	931.64	1011.08	541.182
AT1G01240	1429.97	0.295491	0.307879	0.959765	0.337173	0.790748	1520.61	1060.35	1270.88	1266.08	2147.18	1314.74
AT1G01250	57.6046	-0.690108	1.27189	-0.542586	0.587415	0.908076	84.2061	24.8587	104.24	0	109.9	22.4219
AT1G01260	477.464	0.501466	0.407022	1.23204	0.217936	0.693568	325.379	420.884	439.991	601.684	306.347	770.497
AT1G01270	0.371879	0.127579	4.06283	0.0314016	0.974949	NA	0	0	1.2121	0	0	1.01918
AT1G01280	0	NA	NA	NA	NA	NA	0	0	0	0	0	0
AT1G01290	450.314	-1.07635	0.385171	-2.79448	0.00519833	0.120042	672.014	648.041	512.717	200.064	420.369	248.679
AT1G01300	659.796	0.387859	0.391067	0.991798	0.321296	0.782766	482.346	557.178	674.532	1170.52	533.017	541.182
AT1G01305	1.86198	1.75012	3.84846	0.454757	0.649284	NA	0	2.57159	0	4.47904	4.12126	0
AT1G01310	14.6464	0.739945	2.54425	0.29083	0.771181	0.958187	0	31.7163	1.2121	0	54.9502	0
AT1G01320	1879.01	0.356766	0.35233	1.01259	0.311256	0.777143	2227.78	1518.95	1196.34	2763.57	2259.83	1307.6
AT1G01340	40.7317	3.19251	1.55609	2.05162	0.0402067	0.347714	1.63507	14.5723	7.87863	206.036	0	14.2685
AT1G01350	280.669	0.625896	0.497652	1.2577	0.208501	0.683926	183.128	234.872	243.632	588.247	217.053	217.084
AT1G01355	3.43065	-0.999384	3.79264	-0.263506	0.792161	NA	0	13.7151	0	0	6.86877	0
AT1G01360	438.961	1.32862	0.457637	2.90322	0.00369351	0.099449	224.005	222.014	303.63	389.676	1067.41	427.035
AT1G01370	22.3738	-1.41213	1.45154	-0.97285	0.330628	0.787319	34.3365	42.0026	21.2117	0	31.5964	5.09588
AT1G01380	15.7421	0.475664	2.03023	0.234291	0.814759	0.968084	12.263	20.5727	6.66654	0	54.9502	0
AT1G01390	6.80872	-1.00917	2.89995	-0.347995	0.727844	0.948842	0	0	27.2722	7.46507	0	6.11506
AT1G01400	0.303024	-1.39758	4.01398	-0.348177	0.727707	NA	0	0	1.81815	0	0	0
AT1G01410	0	NA	NA	NA	NA	NA	0	0	0	0	0	0
AT1G01420	131.39	-0.0384995	0.526666	-0.0731005	0.941726	0.991338	192.121	108.864	98.7859	117.948	112.648	157.972
AT1G01430	2851.42	-0.716054	0.278114	-2.57468	0.0100333	0.17375	3458.99	3453.65	3723.56	1796.1	1718.57	2957.65
AT1G01440	285.226	0.127314	0.366913	0.346988	0.7286	0.948988	242.808	241.729	333.327	256.798	318.711	317.983
AT1G01448	496.666	0.131846	0.522664	0.252257	0.800842	0.964915	601.706	462.886	358.175	162.738	589.341	805.149
AT1G01450	0	NA	NA	NA	NA	NA	0	0	0	0	0	0
AT1G01453	2.0084	-1.51973	3.8614	-0.393571	0.693898	NA	8.99288	0	0	0	0	3.05753
AT1G01460	164.066	0.328896	0.463066	0.710257	0.477545	0.864515	181.493	156.867	98.1799	192.599	179.962	175.298
AT1G01470	11631.2	0.407913	0.362321	1.12584	0.260235	0.735375	6209.18	11908.2	11876.7	8117.51	11979.1	19696.6
AT1G01471	3.62197	-4.94322	3.83615	-1.28859	0.197541	NA	11.4455	10.2864	0	0	0	0
AT1G01480	264.231	2.5724	0.6876	3.74113	0.000183198	0.0153978	138.163	48.8602	41.2113	886.85	325.58	144.723
AT1G01490	1499.85	0.223825	0.343821	0.650992	0.515052	0.879645	1481.37	1555.81	1113.31	2339.55	1491.9	1017.14
AT1G01500	272.348	-0.289262	0.476844	-0.606617	0.544105	0.889449	306.576	279.446	313.327	113.469	274.751	346.52
AT1G01510	356.645	0.102974	0.393762	0.261514	0.793696	0.963392	361.35	311.162	359.993	249.333	335.196	522.837
AT1G01520	152.711	0.507801	0.577475	0.879348	0.379213	0.81337	190.486	61.7182	126.058	131.385	248.65	157.972
AT1G01530	4.39156	-1.70126	3.17086	-0.536528	0.591593	NA	0	11.1436	9.09073	0	0	6.11506
AT1G01540	912.603	-0.190024	0.282232	-0.673288	0.500764	0.87379	1179.7	803.193	934.527	870.427	943.769	743.998
AT1G01550	4804.55	-0.115041	0.295038	-0.389918	0.696597	0.940016	3709.97	5525.49	5753.22	3175.64	5154.33	5508.65
AT1G01560	247.211	-0.586941	0.434379	-1.35122	0.176626	0.647428	263.246	291.447	335.145	288.152	144.244	161.03
AT1G01570	65.1254	0.693744	0.711421	0.975153	0.329484	0.786757	27.7962	49.7174	71.5137	111.976	60.4452	69.304
AT1G01580	0	NA	NA	NA	NA	NA	0	0	0	0	0	0
AT1G01590	3.29594	-4.80828	3.91699	-1.22754	0.219619	NA	0	13.7151	6.06049	0	0	0
AT1G01600	15.8224	0.167101	1.62245	0.102993	0.917968	0.988882	16.3507	18.8583	9.69678	0	8.24253	41.7862
AT1G01610	544.506	-0.089422	0.505567	-0.176875	0.859607	0.976531	435.746	494.602	754.531	347.872	256.892	977.39
AT1G01620	6754.95	-0.0705048	0.304443	-0.231586	0.816859	0.96848	5124.31	6373.26	9261.03	8756.52	5592.55	5422.02
AT1G01630	790.552	-0.398405	0.363046	-1.0974	0.272468	0.745027	734.146	905.2	1058.77	473.285	565.987	1005.93
AT1G01640	12.9588	0.770519	1.83903	0.41898	0.67523	0.932249	0	25.7159	3.03024	34.3393	5.49502	9.17258
AT1G01650	1156.76	1.24527	0.356383	3.49419	0.000475505	0.0292932	485.616	850.339	723.016	2215.63	1049.55	1616.41
AT1G01660	10.2808	1.47237	3.0564	0.481733	0.629995	0.920522	16.3507	0	0	0	45.3339	0
AT1G01670	19.3578	0.541839	2.31378	0.234179	0.814846	0.968084	0	0	47.2718	17.9162	0	50.9588
AT1G01680	0	NA	NA	NA	NA	NA	0	0	0	0	0	0
AT1G01690	13.8279	-0.504325	2.10556	-0.23952	0.810702	0.967067	23.7085	0	24.848	31.3533	0	3.05753
AT1G01695	12.6116	7.50874	2.78189	2.69915	0.00695162	0.142302	0	0	0	74.6507	0	1.01918
AT1G01700	55.2218	2.69806	1.30018	2.07514	0.0379735	0.338568	8.17535	24.0015	12.121	143.329	0	143.704
AT1G01710	483.363	0.296764	0.35627	0.832975	0.404859	0.830442	476.623	520.318	305.449	452.383	489.057	656.349
AT1G01720	6109.84	0.2312	0.378135	0.611423	0.54092	0.888269	3610.23	7011.87	6242.91	4075.93	5249.12	10469
AT1G01725	716.496	-0.445253	0.448264	-0.993284	0.320571	0.782241	1178.07	736.332	565.443	344.886	487.683	986.562
AT1G01730	709.842	-0.165508	0.320063	-0.517112	0.605078	0.913332	668.743	924.915	658.775	646.475	523.4	836.743
AT1G01740	46.6798	-1.26905	0.793151	-1.60001	0.109597	0.541092	100.557	36.8595	60.6049	25.3812	26.1013	30.5753
AT1G01750	47.2012	0.192278	1.33054	0.144512	0.885096	0.981746	87.4762	30.8591	13.9391	0	103.032	47.9013
AT1G01760	83.4635	-0.24976	0.567904	-0.439792	0.660088	0.926414	86.6587	103.721	81.8166	61.2135	83.799	83.5724
AT1G01770	441.659	-0.189758	0.397839	-0.476972	0.633382	0.920876	532.215	555.463	324.236	570.331	296.731	370.98
AT1G01780	174.871	0.975634	0.530305	1.83976	0.0658033	0.433871	68.6729	148.295	136.361	286.659	270.63	138.608
AT1G01790	1195.13	-0.0169586	0.251554	-0.0674152	0.946251	0.991647	1199.32	1099.78	1307.85	1104.83	1072.9	1386.08
AT1G01800	1436.46	0.052426	0.274697	0.19085	0.848643	0.973709	1367.74	1350.94	1512.09	1799.08	1086.64	1502.27
AT1G01810	25.455	-0.428099	1.53837	-0.278281	0.780797	0.960582	15.5332	38.5739	33.3327	61.2135	0	4.0767
AT1G01820	417.618	-0.698841	0.343691	-2.03334	0.0420178	0.353636	539.573	526.319	485.445	228.431	340.691	385.248
AT1G01830	289.079	-0.0281474	0.380897	-0.0738978	0.941092	0.991161	304.123	255.445	316.357	206.036	336.57	315.945
AT1G01840	65.335	-0.763778	0.763849	-0.999906	0.317356	0.780041	110.367	39.431	96.9678	59.7205	23.3538	62.1697
AT1G01860	111.848	-0.354741	0.568751	-0.623719	0.532812	0.885287	133.258	122.579	121.21	89.5808	57.6977	146.761
AT1G01870	0	NA	NA	NA	NA	NA	0	0	0	0	0	0
AT1G01880	4.02725	-4.07205	3.91551	-1.03998	0.298349	NA	0	23.1443	0	0	0	1.01918
AT1G01890	0	NA	NA	NA	NA	NA	0	0	0	0	0	0
AT1G01900	13.1801	-1.71191	2.48478	-0.688956	0.490851	0.869661	55.5924	5.14318	0	0	0	18.3452
AT1G01910	918.139	0.261751	0.267053	0.980146	0.327014	0.785357	743.139	790.335	970.89	1079.45	1049.55	875.472
AT1G01920	163.103	0.421753	0.563347	0.748655	0.454065	0.852489	125.083	186.012	107.877	104.511	148.365	306.772
AT1G01930	154.363	0.367464	0.448738	0.818885	0.412852	0.834307	115.272	148.295	140.603	209.022	166.224	146.761
AT1G01940	216.558	0.439825	0.583082	0.75431	0.450663	0.85035	230.545	192.012	129.088	92.5668	421.743	233.391
AT1G01950	565.376	0.410403	0.334518	1.22685	0.21988	0.695132	395.687	532.319	529.081	527.034	563.239	844.897
AT1G01960	194.012	-0.493797	0.571189	-0.864508	0.387309	0.818654	292.677	192.012	196.36	192.599	59.0714	231.353
AT1G01970	210.301	0.0484928	0.398175	0.121788	0.903067	0.986512	218.282	235.729	166.663	207.529	199.194	234.41
AT1G01980	0	NA	NA	NA	NA	NA	0	0	0	0	0	0
AT1G01990	467.247	0.0234123	0.332506	0.0704117	0.943866	0.991338	497.061	524.604	368.478	556.894	471.198	385.248
AT1G02000	304.779	-0.601135	0.471918	-1.27381	0.20273	0.677984	261.611	315.448	524.232	255.305	332.449	139.627
AT1G02010	178.824	0.129965	0.423225	0.307082	0.758781	0.954125	165.96	200.584	146.058	194.092	159.356	206.893
AT1G02020	398.105	0.0963872	0.368875	0.2613	0.793861	0.963532	309.028	449.171	395.75	415.058	522.027	297.599
AT1G02030	19.4151	-0.17375	1.9254	-0.0902408	0.928096	0.989932	51.5047	0	10.3028	0	30.2226	24.4602
AT1G02040	0.808065	-2.79364	3.9479	-0.707626	0.479177	NA	0	0	4.84839	0	0	0
AT1G02050	62.3933	-0.684771	0.705277	-0.970924	0.331586	0.78801	91.5639	44.5742	94.5436	37.3253	64.5665	41.7862
AT1G02060	24.8066	0.651801	2.27276	0.286789	0.774274	0.95881	0	6.85757	50.9081	91.0738	0	0
AT1G02065	30.565	0.689879	1.47417	0.467976	0.639801	0.922283	0	61.7182	8.48468	52.2555	42.5864	18.3452
AT1G02070	1.2858	-3.44539	3.93301	-0.87602	0.381019	NA	0	7.71477	0	0	0	0
AT1G02074	0	NA	NA	NA	NA	NA	0	0	0	0	0	0
AT1G02080	238.998	0.00379176	0.443335	0.0085528	0.993176	0.998967	289.407	253.73	172.724	331.449	195.073	191.605
AT1G02090	617.007	0.564029	0.31668	1.78107	0.074901	0.460181	576.362	506.603	410.901	897.301	585.219	725.653
AT1G02100	1292.55	0.525399	0.264406	1.9871	0.0469118	0.372014	1187.88	993.491	997.556	1467.63	1844.95	1263.78
AT1G02110	214.772	-0.256588	0.397811	-0.644999	0.518928	0.880565	286.137	213.442	201.814	213.501	192.326	181.413
AT1G02120	1080.37	0.225057	0.277013	0.81244	0.416539	0.835869	1017.83	990.062	981.799	1088.41	931.406	1472.71
AT1G02130	1150.27	0.0850153	0.290944	0.292205	0.77013	0.958157	1006.39	1301.22	1041.19	1525.86	958.881	1068.1
AT1G02136	3.95142	-5.06934	3.9153	-1.29475	0.195406	NA	23.7085	0	0	0	0	0
AT1G02140	3839.92	0.660143	0.264893	2.49211	0.0126986	0.19996	2630.01	3113.34	3184.79	6022.82	4562.24	3526.35
AT1G02145	509.355	0.234772	0.297445	0.789294	0.42994	0.841169	415.308	473.173	515.747	519.569	505.542	626.793
AT1G02150	1506.43	-0.172202	0.252077	-0.683133	0.494523	0.870976	1578.66	1686.11	1524.82	1412.39	1153.95	1682.66
AT1G02160	508.556	0.990782	0.346945	2.85573	0.00429378	0.107756	376.066	287.161	357.569	871.92	674.513	484.109
AT1G02170	1004.37	0.393022	0.44946	0.874432	0.381883	0.814759	676.101	848.625	1081.19	827.129	570.108	2023.06
AT1G02180	51.5246	-0.823415	1.01423	-0.811861	0.416871	0.836191	102.192	80.5765	14.5452	59.7205	43.9601	8.15341
AT1G02190	9.31294	3.97033	2.24768	1.76641	0.0773272	0.465614	0	3.42879	0	16.4231	1.37375	34.652
AT1G02205	573.574	0.171868	0.394844	0.435282	0.663358	0.928158	619.691	420.026	579.383	488.215	410.753	923.373
AT1G02210	0	NA	NA	NA	NA	NA	0	0	0	0	0	0
AT1G02220	103.567	0.145271	0.650688	0.223258	0.823335	0.970001	90.7464	126.865	77.5742	50.7625	182.709	92.745
AT1G02228.1	2.58886	-4.45876	3.91979	-1.1375	0.255329	NA	15.5332	0	0	0	0	0
AT1G02230	0.142866	-0.19541	4.08047	-0.047889	0.961805	NA	0	0.857197	0	0	0	0
AT1G02250	8.70203	-1.95983	2.42797	-0.807189	0.419558	0.836945	39.2417	0	2.42419	0	1.37375	9.17258
AT1G02260	161.714	0.0190237	0.468501	0.0406055	0.96761	0.995901	188.033	138.009	156.361	126.906	142.87	218.104
AT1G02270	1175.55	0.456665	0.351165	1.30043	0.193455	0.66631	623.779	1189.79	1158.77	1799.08	1251.49	1030.39
AT1G02280	1557.32	0.289346	0.395451	0.731686	0.46436	0.858364	1595.83	1393.8	1214.52	2759.09	1527.61	853.05
AT1G02290	28.0434	-2.67303	1.58546	-1.68597	0.0918021	0.503744	55.5924	66.0041	24.2419	0	0	22.4219
AT1G02300	877.677	-0.0617306	0.301848	-0.204509	0.837956	0.972565	950.793	767.191	971.496	637.517	1060.54	878.53
AT1G02305	933.768	-0.260491	0.263657	-0.987994	0.323156	0.783542	964.691	924.058	1164.83	737.549	917.668	893.817
AT1G02310	14.0676	-4.86424	1.9029	-2.55623	0.0105815	0.17974	51.5047	21.4299	8.48468	2.98603	0	0
AT1G02320	0.202016	-0.834203	4.06283	-0.205325	0.837318	NA	0	0	1.2121	0	0	0
AT1G02330	369.178	0.73315	0.328114	2.23443	0.0254546	0.281388	318.021	229.729	284.237	429.988	486.309	466.783
AT1G02335	26.5418	-7.81759	1.92084	-4.06987	4.7e-05	0.00622932	137.346	8.57197	13.3331	0	0	0
AT1G02340	499.657	-1.13616	0.506712	-2.24222	0.024947	0.278828	648.305	691.758	721.804	129.892	221.174	585.007
AT1G02350	193.106	0.442799	0.452075	0.97948	0.327343	0.785357	224.005	133.723	133.331	271.728	195.073	200.778
AT1G02360	65.7737	0.925531	0.923508	1.00219	0.316252	0.78001	6.54028	60.861	68.4835	110.483	108.527	39.7479
AT1G02370	46.2922	0.156296	0.835445	0.187081	0.851597	0.97436	59.68	30.8591	40.6053	85.1018	32.9701	28.5369
AT1G02380	162.216	-0.543765	0.620809	-0.875897	0.381086	0.814355	146.339	252.016	178.784	68.6786	250.023	77.4574
AT1G02390	1859.12	0.159728	0.537325	0.297266	0.766263	0.9568	594.348	2524.44	2150.26	727.097	3093.7	2064.85
AT1G02391	3.19355	0.625826	3.12015	0.200575	0.841031	NA	2.4526	5.14318	0	0	1.37375	10.1918
AT1G02400	2163.19	0.336254	0.393809	0.853848	0.393189	0.822317	1061.98	3004.47	1670.27	2036.47	3332.73	1873.25
AT1G02405	28.8738	2.15737	0.990693	2.17764	0.0294332	0.297032	4.90521	17.1439	9.69678	43.2974	64.5665	33.6328
AT1G02410	804.386	0.263269	0.271052	0.971288	0.331405	0.78801	688.364	792.05	713.925	767.409	831.121	1033.44
AT1G02420	6.48123	-0.394595	1.69328	-0.233036	0.815734	0.96848	6.54028	7.71477	7.87863	4.47904	4.12126	8.15341
AT1G02430	40.9083	0.88117	0.834792	1.05556	0.291171	0.761831	30.2488	38.5739	17.5754	52.2555	74.1827	32.6136
AT1G02440	10.5116	-1.70165	2.5326	-0.671898	0.501648	0.874583	0	25.7159	22.4238	14.9301	0	0
AT1G02450	1.04533	-3.1604	3.93871	-0.802394	0.422325	NA	0.817535	0	5.45444	0	0	0
AT1G02460	0	NA	NA	NA	NA	NA	0	0	0	0	0	0
AT1G02470	59.5155	-0.964183	0.906591	-1.06353	0.287543	0.758997	122.63	23.1443	90.3013	14.9301	71.4352	34.652
AT1G02475	1653.72	-0.150759	0.252713	-0.596562	0.5508	0.892012	1891.78	1651.82	1676.33	1382.53	1924.63	1395.25
AT1G02480	0	NA	NA	NA	NA	NA	0	0	0	0	0	0
AT1G02490	0	NA	NA	NA	NA	NA	0	0	0	0	0	0
AT1G02500	8866.96	-0.768771	0.243187	-3.16123	0.00157104	0.0605613	13721.5	10192.9	9611.33	7118.69	5441.44	7115.89
AT1G02510	5.18604	0.233995	2.76916	0.0845005	0.932658	NA	0	13.7151	0.606049	0	13.7375	3.05753
AT1G02520	0	NA	NA	NA	NA	NA	0	0	0	0	0	0
AT1G02530	1.37375	4.30853	3.94847	1.09119	0.275189	NA	0	0	0	0	8.24253	0
AT1G02540	0	NA	NA	NA	NA	NA	0	0	0	0	0	0
AT1G02550	0	NA	NA	NA	NA	NA	0	0	0	0	0	0
AT1G02560	2596.66	-0.277688	0.222445	-1.24835	0.211904	0.687294	3142.6	2940.18	2455.1	2429.13	2180.15	2432.77
AT1G02570	0	NA	NA	NA	NA	NA	0	0	0	0	0	0
AT1G02575	0	NA	NA	NA	NA	NA	0	0	0	0	0	0
AT1G02580	2.36317	-4.33191	3.92098	-1.1048	0.269245	NA	3.27014	0	10.9089	0	0	0
AT1G02590	3.26698	-1.37806	2.63447	-0.523086	0.600914	NA	5.72274	1.71439	6.66654	4.47904	0	1.01918
AT1G02600	0	NA	NA	NA	NA	NA	0	0	0	0	0	0
AT1G02610	1237.02	-0.450105	0.41812	-1.0765	0.281706	0.753055	1541.05	1596.96	1146.64	954.036	1699.33	484.109
AT1G02620	60.7921	-0.710708	1.17271	-0.606041	0.544488	0.889476	81.7535	101.149	43.6355	0	89.294	48.9204
AT1G02630	0	NA	NA	NA	NA	NA	0	0	0	0	0	0
AT1G02640	323.675	-0.627722	0.591664	-1.06094	0.288716	0.760135	187.215	592.323	398.78	456.862	197.821	109.052
AT1G02650	59.5063	-0.66429	0.844469	-0.786636	0.431495	0.841904	140.616	46.2886	32.1206	26.8742	67.314	43.8246
AT1G02660	2579.39	-0.123	0.24437	-0.503334	0.614729	0.916465	2092.89	3105.62	2869.03	2460.49	2595.02	2353.28
AT1G02670	46.5391	1.12594	0.917571	1.22709	0.21979	0.695132	60.4976	10.2864	16.9694	82.1157	60.4452	48.9204
AT1G02680	502.017	0.408688	0.406691	1.00491	0.314941	0.779658	461.09	349.736	483.021	383.704	890.193	444.361
AT1G02681	8.13856	0.428249	2.00297	0.213807	0.830697	0.971272	17.1682	0	3.63629	7.46507	16.4851	4.0767
AT1G02690	29.8068	-2.40578	1.45162	-1.65731	0.097457	0.514983	31.8839	75.4333	43.0295	0	27.4751	1.01918
AT1G02700	9.50198	1.6194	2.59289	0.624554	0.532264	0.885037	0	0	13.9391	0	24.7276	18.3452
AT1G02710	1.05006	-3.16147	3.93869	-0.802671	0.422165	NA	3.27014	0	3.03024	0	0	0
AT1G02720	147.072	0.103518	0.548093	0.18887	0.850195	0.973902	152.879	129.437	143.634	80.6227	137.375	238.487
AT1G02730	14.5717	1.43177	2.4084	0.594488	0.552185	0.892596	23.7085	0	0	0	17.8588	45.8629
AT1G02740	90.0236	1.49249	0.650771	2.29342	0.021824	0.262738	49.0521	57.4322	35.1508	126.906	203.316	68.2848
AT1G02750	203.527	0.883817	0.657335	1.34455	0.178772	0.650976	81.7535	114.007	233.329	76.1437	388.773	327.155
AT1G02760	0	NA	NA	NA	NA	NA	0	0	0	0	0	0
AT1G02770	16.9542	2.88238	1.70661	1.68895	0.0912292	0.502535	0.817535	0.857197	10.3028	76.1437	1.37375	12.2301
AT1G02780	4874.59	-0.153381	0.242402	-0.632753	0.526895	0.883312	5504.46	5425.2	4471.43	5107.6	3590.99	5147.86
AT1G02790	0.136256	-0.19541	4.08047	-0.047889	0.961805	NA	0.817535	0	0	0	0	0
AT1G02800	0	NA	NA	NA	NA	NA	0	0	0	0	0	0
AT1G02810	0.428598	-1.85053	3.98542	-0.464324	0.642416	NA	0	2.57159	0	0	0	0
AT1G02813	0	NA	NA	NA	NA	NA	0	0	0	0	0	0
AT1G02816	523.616	0.0261111	0.503511	0.051858	0.958642	0.994652	304.123	563.178	688.471	671.856	710.231	203.835
AT1G02820	182.329	0.188883	0.680715	0.277478	0.781413	0.960582	230.545	154.295	126.058	223.952	317.337	41.7862
AT1G02830	0	NA	NA	NA	NA	NA	0	0	0	0	0	0
AT1G02840	1310.26	0.295783	0.322423	0.917375	0.358946	0.800866	1384.9	987.491	1156.95	1769.22	919.042	1643.93
AT1G02850	697.746	-1.93359	0.444936	-4.34578	1.39e-05	0.0025016	1307.24	1265.22	744.228	474.778	243.155	151.857
AT1G02860	673.787	-0.0695322	0.323442	-0.214976	0.829786	0.971206	608.246	708.044	753.925	467.313	836.616	668.579
AT1G02870	75.4694	-0.23832	0.716344	-0.33269	0.739368	0.950554	78.4833	100.292	66.6654	25.3812	85.1728	96.8217
AT1G02880	1330.2	1.14173	0.373441	3.05734	0.00223312	0.0749521	606.611	1032.92	850.286	1130.21	1611.41	2749.74
AT1G02890	164.771	0.660038	0.526066	1.25467	0.209599	0.685068	125.9	170.582	86.665	206.036	276.125	123.32
AT1G02900	227.989	1.19805	2.01266	0.595258	0.551671	0.892345	35.9715	276.875	102.422	0	729.464	223.2
AT1G02910	1228.84	0.257937	0.259098	0.995519	0.319484	0.781724	1088.96	1094.64	1173.31	1612.45	1300.95	1102.75
AT1G02920	803.632	-0.46478	0.315052	-1.47525	0.140146	0.595385	790.556	923.201	1081.19	892.822	567.361	566.662
AT1G02930	2100.59	0.489294	0.406143	1.20473	0.228306	0.705355	1265.54	2085.56	1891.48	4177.45	1408.1	1775.4
AT1G02940	4.57918	6.04826	3.9193	1.5432	0.122783	NA	0	0	0	0	27.4751	0
AT1G02950	0	NA	NA	NA	NA	NA	0	0	0	0	0	0
AT1G02952	0	NA	NA	NA	NA	NA	0	0	0	0	0	0
AT1G02960	531.751	0.510276	0.284866	1.79129	0.0732473	0.455415	430.841	426.027	458.779	707.688	585.219	581.949
AT1G02965	0	NA	NA	NA	NA	NA	0	0	0	0	0	0
AT1G02970	14.5264	0.175026	2.0682	0.0846275	0.932558	0.990502	17.1682	18.8583	4.84839	46.2834	0	0
AT1G02980	0	NA	NA	NA	NA	NA	0	0	0	0	0	0
AT1G02990	98.847	-0.0411331	0.5532	-0.0743548	0.940728	0.990971	79.3009	90.8628	130.3	119.441	86.5465	86.63
AT1G03000	269.563	-0.834079	0.557682	-1.49562	0.134753	0.587106	450.462	334.307	252.116	64.1996	243.155	273.139
AT1G03010	1.01918	3.89998	3.96201	0.984345	0.324946	NA	0	0	0	0	0	6.11506
AT1G03020	1.79564	-1.48883	3.7827	-0.393589	0.693884	NA	2.4526	0	5.45444	1.49301	1.37375	0
AT1G03022	0	NA	NA	NA	NA	NA	0	0	0	0	0	0
AT1G03030	445.446	0.492446	0.352438	1.39726	0.162337	0.627767	274.692	374.595	461.203	425.509	530.269	606.41
AT1G03040	489.578	-0.267966	0.353167	-0.758751	0.448002	0.849509	663.838	432.884	507.869	555.401	331.075	446.399
AT1G03050	10.389	-5.47875	3.04893	-1.79694	NA	NA	61.3151	0	0	0	0	1.01918
AT1G03055	129.99	-0.20026	0.599109	-0.334263	0.738181	0.950271	156.149	151.724	109.695	50.7625	133.254	178.356
AT1G03060	217.965	0.594733	0.560952	1.06022	0.289044	0.76035	201.931	200.584	118.179	427.002	250.023	110.071
AT1G03070	7.24251	-5.94605	2.51568	-2.3636	0.0180985	0.238166	15.5332	4.28598	23.6359	0	0	0
AT1G03080	647.688	1.68757	0.369756	4.56401	5.02e-06	0.00114936	343.365	300.019	276.964	1443.74	886.072	635.966
AT1G03090	1371.71	-0.386548	0.307598	-1.25667	0.208874	0.684298	1567.21	1882.4	1213.92	1428.81	847.607	1290.28
AT1G03100	29.9909	-3.74685	1.3375	-2.80138	0.00508847	0.118348	117.725	24.0015	26.0601	2.98603	0	9.17258
AT1G03103	1.31311	-3.48922	3.93222	-0.887339	0.374897	NA	0	0	7.87863	0	0	0
AT1G03106	8.69758	2.75421	2.34767	1.17317	0.240729	0.715789	1.63507	5.14318	0	40.3114	0	5.09588
AT1G03110	161.99	-0.136008	0.457826	-0.297074	0.76641	0.9568	129.17	175.725	203.632	152.287	182.709	128.416
AT1G03120	89.9027	-1.62231	0.69479	-2.33497	0.019545	0.247871	166.777	174.868	66.0593	37.3253	26.1013	68.2848
AT1G03130	33060.7	0.373512	0.273303	1.36666	0.171732	0.641549	29387.9	27288	29737	49733.8	36998	25219.5
AT1G03140	532.651	0.285552	0.34413	0.829781	0.406663	0.831915	620.509	446.599	373.326	707.688	478.067	569.719
AT1G03150	593.995	0.420461	0.370673	1.13432	0.256661	0.731959	430.841	457.743	634.533	955.529	619.563	465.763
AT1G03160	703.869	-0.22298	0.40396	-0.551987	0.580957	0.905557	1039.09	712.33	524.232	416.551	585.219	945.795
AT1G03170	8.72064	0.674294	1.85591	0.363323	0.716363	0.945721	8.99288	5.14318	6.06049	0	17.8588	14.2685
AT1G03180	61.441	-0.968419	0.821863	-1.17832	0.238668	0.71416	136.528	25.7159	81.8166	26.8742	50.8289	46.8821
AT1G03190	106.573	0.271624	0.616313	0.440724	0.659413	0.926414	134.076	101.149	54.5444	165.724	76.9302	107.013
AT1G03200	0.457918	2.7162	4.03098	0.673831	0.500419	NA	0	0	0	0	2.74751	0
AT1G03210	265.935	0.396617	0.425867	0.931315	0.351691	0.796392	162.689	276.875	249.692	235.896	267.882	402.574
AT1G03220	6685.85	-0.552234	0.336773	-1.63978	0.10105	0.522426	5128.4	9886.05	8836.8	4849.31	3781.95	7632.61
AT1G03230	318.989	-0.46054	0.516286	-0.892024	0.37238	0.80858	201.931	504.889	401.81	334.435	126.385	344.481
AT1G03240	0	NA	NA	NA	NA	NA	0	0	0	0	0	0
AT1G03250	462.123	0.017919	0.393052	0.0455892	0.963638	0.995523	479.893	438.885	459.385	258.291	619.563	516.722
AT1G03260	205.857	0.23966	0.46532	0.515044	0.606523	0.913332	169.23	162.01	234.541	323.984	177.214	168.164
AT1G03270	38.4081	-1.26104	1.25554	-1.00438	0.315195	0.779658	89.9288	39.431	33.3327	0	45.3339	22.4219
AT1G03280	390.735	0.556082	0.406552	1.3678	0.171374	0.641082	430.023	212.585	306.055	615.121	402.51	378.114
AT1G03290	285.239	0.45812	0.443482	1.03301	0.301601	0.770627	276.327	208.299	235.753	467.313	335.196	188.548
AT1G03300	39.0351	-0.594217	1.26262	-0.470623	0.63791	0.921367	34.3365	62.5754	44.2416	0	28.8488	64.2081
AT1G03310	224.137	-0.256946	0.520863	-0.493309	0.621794	0.918605	334.372	176.583	221.814	101.525	212.932	297.599
AT1G03320	4.65136	-3.20992	3.14748	-1.01984	0.307805	NA	11.4455	13.7151	0	0	2.74751	0
AT1G03330	395.544	0.562111	0.396092	1.41914	0.155857	0.617963	402.227	208.299	347.266	518.076	550.876	346.52
AT1G03340	43.6495	0.132313	0.871745	0.15178	0.879361	0.980108	27.7962	41.1454	55.7565	43.2974	75.5565	18.3452
AT1G03350	676.945	0.675668	0.309958	2.17987	0.0292671	0.296839	476.623	585.465	501.202	933.133	954.759	610.486
AT1G03360	97.6376	0.0420605	0.843818	0.0498455	0.960246	0.994859	137.346	23.1443	127.876	70.1716	189.578	37.7095
AT1G03365	251.951	0.317829	0.465576	0.682657	0.494824	0.870976	286.955	222.014	163.633	385.197	285.741	168.164
AT1G03370	749.798	0.614313	0.395609	1.55283	0.120463	0.5625	390.782	732.046	655.139	940.598	539.886	1240.34
AT1G03380	444.751	-0.0495084	0.411848	-0.120211	0.904316	0.987122	575.544	405.454	375.75	404.607	636.048	271.101
AT1G03390	1.14293	-3.27483	3.93629	-0.831959	0.405432	NA	0	6.85757	0	0	0	0
AT1G03400	749.574	-0.328146	0.440085	-0.745643	0.455883	0.85352	846.966	815.194	842.408	297.11	583.846	1111.92
AT1G03410	213.72	-0.40375	0.720352	-0.56049	0.575145	0.90312	366.256	192.012	172.118	294.124	27.4751	230.334
AT1G03420.1	0	NA	NA	NA	NA	NA	0	0	0	0	0	0
AT1G03430	433.23	0.285443	0.438116	0.651524	0.514708	0.879645	302.488	363.451	506.051	259.784	468.45	699.155
AT1G03440	153.118	-0.838045	0.534919	-1.56668	0.11719	0.555758	222.369	157.724	209.693	59.7205	107.153	162.049
AT1G03445	3.03729	-4.68919	3.91787	-1.19687	0.231356	NA	13.0806	5.14318	0	0	0	0
AT1G03457	118.67	0.714516	0.526201	1.35788	0.174503	0.644689	75.2132	72.8617	121.21	179.162	120.89	142.685
AT1G03470	52.0932	1.45225	0.733663	1.97946	0.0477646	0.374767	26.1611	24.0015	33.3327	67.1856	109.9	51.978
AT1G03475	1525.98	0.703731	0.24468	2.87613	0.00402584	0.103803	1281.08	1086.93	1114.52	2194.73	1836.71	1641.89
AT1G03490	0.202016	-0.834203	4.06283	-0.205325	0.837318	NA	0	0	1.2121	0	0	0
AT1G03495	42.3626	-0.046684	1.24907	-0.0373751	0.970186	0.996655	36.7891	38.5739	53.9383	0	49.4552	75.419
AT1G03502	2.73719	5.30198	3.92777	1.34987	0.177058	NA	0	0	0	16.4231	0	0
AT1G03506	4.23022	0.238838	3.2899	0.0725974	0.942127	NA	7.35781	4.28598	0	0	13.7375	0
AT1G03510	15.1574	2.90395	1.75576	1.65395	0.0981374	0.515639	0	7.71477	3.03024	49.2694	1.37375	29.5561
AT1G03515	0	NA	NA	NA	NA	NA	0	0	0	0	0	0
AT1G03520	382.899	-0.675675	0.442453	-1.52711	0.126734	0.572067	309.028	498.031	606.049	168.711	387.399	328.175
AT1G03530	24.9067	-1.37125	1.05731	-1.29692	0.194657	0.667519	22.0734	46.2886	39.3932	20.9022	5.49502	15.2876
AT1G03540	1.07197	2.78869	3.96798	0.702798	0.482182	NA	0.817535	0	0	1.49301	4.12126	0
AT1G03545	0.202016	-0.834203	4.06283	-0.205325	0.837318	NA	0	0	1.2121	0	0	0
AT1G03550	99.0612	0.754452	0.536707	1.40571	0.159812	0.624208	94.0165	61.7182	65.4533	138.85	118.143	116.186
AT1G03560	151.241	-0.138041	0.573336	-0.240769	0.809734	0.966652	128.353	223.728	123.028	235.896	101.658	94.7834
AT1G03570	0	NA	NA	NA	NA	NA	0	0	0	0	0	0
AT1G03580	78.4339	-0.609868	0.585867	-1.04097	0.297891	0.766754	106.28	102.864	75.15	61.2135	70.0615	55.0355
AT1G03590	339.313	-0.378768	0.426519	-0.888044	0.374517	0.809708	443.921	370.309	337.569	176.176	274.751	433.15
AT1G03600	5765.96	-0.0906059	0.243255	-0.372473	0.70954	0.944465	6792.08	5115.75	5932.61	6718.56	4580.1	5456.67
AT1G03610	3310.36	-0.353011	0.226782	-1.55661	0.119563	0.560042	3758.21	3974.82	3407.81	2427.64	3262.67	3031.03
AT1G03620	69.156	2.26064	0.932093	2.42534	0.0152942	0.220786	43.3293	23.1443	5.45444	31.3533	137.375	174.279
AT1G03630	5071.43	0.117863	0.271511	0.4341	0.664216	0.928432	5381.83	4490.85	4721.73	4728.37	4007.24	7098.56
AT1G03640	1.22195	3.00977	3.95935	0.760167	0.447155	NA	0.817535	0	0	0	5.49502	1.01918
AT1G03650	18.2833	0.956067	1.9319	0.494885	0.620681	0.917937	24.526	0	12.727	29.8603	42.5864	0
AT1G03660	0	NA	NA	NA	NA	NA	0	0	0	0	0	0
AT1G03670	5.26574	6.25475	3.91763	1.59656	0.110363	NA	0	0	0	0	0	31.5945
AT1G03680	9447.22	-0.068049	0.227359	-0.299302	0.76471	0.955679	10605.9	8755.41	9649.51	9144.71	7621.59	10906.2
AT1G03687	163.499	-0.404028	0.54828	-0.7369	0.461183	0.856114	191.303	210.013	157.573	191.106	61.819	169.183
AT1G03700	1.01918	3.89998	3.96201	0.984345	0.324946	NA	0	0	0	0	0	6.11506
AT1G03710	2.8355	-4.59391	3.91863	-1.17233	0.241066	NA	0	4.28598	12.727	0	0	0
AT1G03720	0	NA	NA	NA	NA	NA	0	0	0	0	0	0
AT1G03730	1051.77	0.899228	0.358141	2.51082	0.012045	0.194589	680.189	877.769	644.23	1587.07	1752.91	768.459
AT1G03740	988.795	0.569495	0.332481	1.71286	0.0867374	0.491256	523.222	1053.49	811.499	1409.4	1034.44	1100.71
AT1G03743	4.72911	0.745372	2.46796	0.302019	0.762637	NA	4.08767	6.00038	0.606049	0	1.37375	16.3068
AT1G03746	15.6873	0.933335	1.22409	0.762473	0.445778	0.848866	16.3507	9.42916	6.66654	10.4511	24.7276	26.4986
AT1G03750	40.4448	-0.96618	0.929075	-1.03994	0.298369	0.767547	35.154	66.8613	58.7867	7.46507	31.5964	42.8054
AT1G03760	13.2719	0.262973	1.62494	0.161835	0.871436	0.979008	24.526	11.1436	0.606049	2.98603	26.1013	14.2685
AT1G03770	18.2538	0.982898	1.27715	0.769606	0.441534	0.846468	1.63507	16.2867	18.7875	28.3673	26.1013	18.3452
AT1G03780	5.31751	-1.07371	2.70352	-0.397152	0.691256	NA	14.7156	6.85757	0	8.95808	1.37375	0
AT1G03790	0	NA	NA	NA	NA	NA	0	0	0	0	0	0
AT1G03800	20.6684	0.925701	1.86218	0.497108	0.619113	0.917625	0	24.0015	18.7875	34.3393	0	46.8821
AT1G03810	0	NA	NA	NA	NA	NA	0	0	0	0	0	0
AT1G03820	0.571464	-2.26918	3.96578	-0.572189	0.567194	NA	0	3.42879	0	0	0	0
AT1G03830	29.9323	2.58682	1.53116	1.68945	0.0911325	0.502291	0	21.4299	4.24234	104.511	45.3339	4.0767
AT1G03840	0	NA	NA	NA	NA	NA	0	0	0	0	0	0
AT1G03850	315.474	-1.90235	0.626914	-3.03447	0.00240959	0.0786967	395.687	532.319	566.656	40.3114	75.5565	282.312
AT1G03860	779.346	-0.0153112	0.315926	-0.0484646	0.961346	0.995188	955.698	727.76	666.654	998.826	644.291	682.848
AT1G03870	1534.72	-0.616713	0.375672	-1.64163	0.100668	0.52189	1257.37	1787.26	2527.83	1812.52	853.102	970.255
AT1G03880	0	NA	NA	NA	NA	NA	0	0	0	0	0	0
AT1G03890	0	NA	NA	NA	NA	NA	0	0	0	0	0	0
AT1G03900	542.667	0.394555	0.296387	1.33121	0.183119	0.654808	483.981	433.742	488.475	641.996	699.241	508.569
AT1G03905	212.121	1.00223	0.456125	2.19727	0.0280013	0.292279	141.434	106.292	175.754	365.788	190.952	292.503
AT1G03910	635.312	0.987231	0.468676	2.10643	0.0351674	0.326624	499.514	414.026	364.235	1537.8	460.208	536.087
AT1G03920	13.0481	-2.55888	2.58025	-0.991718	NA	NA	66.2203	0.857197	0	0	0	11.2109
AT1G03930	686.869	0.259514	0.286016	0.90734	0.364227	0.803171	546.113	664.327	665.441	624.08	855.849	765.401
AT1G03935	11.3858	-0.948318	2.09588	-0.452468	0.650932	0.924121	13.0806	24.0015	7.87863	0	23.3538	0
AT1G03940	11.5142	-0.000752658	1.73425	-0.000433996	0.999654	0.999964	14.7156	10.2864	9.69678	0	6.86877	27.5177
AT1G03950	224.668	0.599929	0.456001	1.31563	0.188298	0.660633	135.711	138.866	260.601	320.998	274.751	217.084
AT1G03960	139.447	-0.139414	0.541028	-0.257683	0.796651	0.964345	81.7535	137.151	219.39	129.892	136.002	132.493
AT1G03970	13.8402	-0.0849004	1.38964	-0.0610954	0.951283	0.993009	3.27014	23.1443	16.3633	16.4231	5.49502	18.3452
AT1G03980	22.8036	-1.80413	1.52499	-1.18305	0.236789	0.71199	76.0307	6.00038	24.2419	22.3952	0	8.15341
AT1G03982	0.91362	0.344029	3.92105	0.0877391	0.930084	NA	0	0	2.42419	0	0	3.05753
AT1G03990	14.5526	0.127433	1.4851	0.085808	0.931619	0.990502	22.0734	7.71477	12.121	1.49301	8.24253	35.6712
AT1G04000	276.372	0.0629123	0.58147	0.108195	0.913841	0.988166	348.27	320.592	141.815	488.215	243.155	116.186
AT1G04010	66.4573	0.920518	0.679804	1.35409	0.175706	0.646551	38.4241	68.5757	30.9085	106.004	86.5465	68.2848
AT1G04020	60.9582	0.390679	0.875158	0.446409	0.655302	0.925341	35.9715	99.4348	23.0299	100.032	24.7276	82.5532
AT1G04030	25.2549	-0.0206243	1.44585	-0.0142646	0.988619	0.998696	17.1682	26.5731	32.7266	14.9301	0	60.1314
AT1G04040	507.733	-0.289562	0.55062	-0.525884	0.598969	0.911303	282.049	631.754	762.409	340.407	195.073	834.705
AT1G04050	80.0686	0.918722	0.837246	1.09731	0.272504	0.745027	21.2559	60.861	84.2408	52.2555	50.8289	210.969
AT1G04070	86.2322	0.0245346	0.583185	0.04207	0.966443	0.995825	89.9288	84.8625	81.8166	101.525	56.3239	102.937
AT1G04080	1469.62	0.189638	0.283327	0.669325	0.503288	0.87556	1366.92	1301.22	1451.49	1824.46	1092.13	1781.52
AT1G04090	12.9674	0.812418	1.65448	0.491042	0.623397	0.919374	8.17535	8.57197	11.5149	0	26.1013	23.441
AT1G04100	157.047	0.579198	0.534569	1.08349	0.278593	0.750847	186.398	100.292	91.5134	119.441	214.306	230.334
AT1G04110	0.541742	0.762702	4.04421	0.188591	0.850413	NA	0	0	1.2121	0	0	2.03835
AT1G04120	124.995	0.0811723	0.523466	0.155067	0.876768	0.980002	153.697	75.4333	135.149	141.836	119.517	124.339
AT1G04130	176.218	0.286259	0.593161	0.4826	0.62938	0.920107	111.185	206.584	158.785	74.6507	306.347	199.758
AT1G04140	692.136	-0.344186	0.314446	-1.09458	0.2737	0.746027	904.193	826.338	593.322	583.768	512.41	732.787
AT1G04150	0	NA	NA	NA	NA	NA	0	0	0	0	0	0
AT1G04160	81.8785	-0.267571	0.737201	-0.362956	0.716638	0.945721	96.4691	108.864	63.0291	32.8463	140.123	49.9396
AT1G04170	310.017	-0.462329	0.452447	-1.02184	0.306857	0.774879	371.161	317.163	389.083	398.635	141.497	242.564
AT1G04171	0.202016	-0.834203	4.06283	-0.205325	0.837318	NA	0	0	1.2121	0	0	0
AT1G04180	0	NA	NA	NA	NA	NA	0	0	0	0	0	0
AT1G04190	363.037	0.794668	0.444566	1.78751	0.0738547	0.457213	265.699	181.726	348.478	682.307	299.478	400.536
AT1G04200	387.129	0.821243	0.349622	2.34895	0.0188266	0.243359	219.099	342.021	278.176	582.275	462.955	438.246
AT1G04210	315.335	-0.725378	0.437071	-1.65963	0.096988	0.514459	295.948	378.881	504.839	168.711	195.073	348.558
AT1G04220	106.13	-0.0894978	0.672832	-0.133017	0.89418	0.984759	139.798	75.4333	112.725	183.641	46.7077	78.4765
AT1G04230	177.615	0.557026	0.488594	1.14006	0.254262	0.729294	137.346	170.582	123.028	258.291	254.145	122.301
AT1G04240	848.721	-0.176963	0.382401	-0.462769	0.64353	0.923048	510.959	831.481	1359.37	819.664	688.251	882.606
AT1G04250	1462.48	-0.115053	0.320344	-0.359156	0.719479	0.945846	1692.3	1011.49	1857.54	1775.19	1241.87	1196.51
AT1G04260	245.455	0.371497	0.572623	0.648764	0.516491	0.879792	139.798	237.443	264.237	516.583	164.851	149.819
AT1G04270	1041.35	-0.273543	0.304117	-0.899467	0.368404	0.805891	1303.97	1110.07	1006.04	1015.25	662.15	1150.65
AT1G04280	1023.5	0.00199722	0.294982	0.00677065	0.994598	0.999048	1255.73	846.053	967.254	804.734	1092.13	1175.11
AT1G04290	65.5227	2.65139	0.883	3.0027	0.00267594	0.0833537	22.0734	11.1436	20.6057	179.162	138.749	21.4027
AT1G04295	0	NA	NA	NA	NA	NA	0	0	0	0	0	0
AT1G04300	700.799	0.677477	0.433001	1.56461	0.117674	0.55641	731.694	484.316	401.204	1364.61	750.07	472.898
AT1G04310	22.3201	1.60009	1.13841	1.40555	0.159859	0.624269	8.99288	12.0008	12.121	68.6786	17.8588	14.2685
AT1G04320	0	NA	NA	NA	NA	NA	0	0	0	0	0	0
AT1G04330	0	NA	NA	NA	NA	NA	0	0	0	0	0	0
AT1G04340	266.687	0.563062	0.446541	1.26094	0.207331	0.683159	232.18	219.442	193.936	315.026	456.086	183.452
AT1G04350	1545.6	-0.341797	0.331921	-1.02976	0.303125	0.771849	2458.33	1176.93	1548.45	1104.83	1622.4	1362.64
AT1G04360	139.88	0.127542	0.562544	0.226725	0.820638	0.970001	74.3957	189.44	137.573	134.371	105.779	197.72
AT1G04370	0	NA	NA	NA	NA	NA	0	0	0	0	0	0
AT1G04380	6.41085	6.53395	3.7522	1.74136	0.0816198	0.476532	0	0	0	0	38.4651	0
AT1G04390	77.7078	-0.440589	0.683406	-0.644695	0.519125	0.880565	62.9502	138.009	67.2714	89.5808	68.6877	39.7479
AT1G04400	998.349	-0.175013	0.301219	-0.581016	0.56123	0.898032	1085.69	994.348	1097.55	780.846	763.807	1267.85
AT1G04410	7769.73	0.299653	0.259898	1.15296	0.248926	0.724732	7132.99	7105.3	6658.05	11542.5	7047.36	7132.19
AT1G04420	2539.14	-0.0561781	0.248326	-0.226227	0.821025	0.970001	3062.49	2253.57	2450.25	2551.56	2086.73	2830.25
AT1G04425	0	NA	NA	NA	NA	NA	0	0	0	0	0	0
AT1G04430	1646.17	0.138642	0.325876	0.425445	0.670512	0.93062	1192.78	1796.68	1710.88	2097.68	1986.45	1092.56
AT1G04440	1440.24	0.0916654	0.341935	0.268079	0.788639	0.962227	1105.31	1613.24	1465.43	877.892	1939.74	1639.85
AT1G04445	44.5409	0.0172522	1.03044	0.0167426	0.986642	0.997972	17.1682	78.8621	36.969	7.46507	68.6877	58.093
AT1G04450	1.87032	0.825029	3.82581	0.215648	0.829262	NA	4.08767	0	0	0	0	7.13423
AT1G04457	0	NA	NA	NA	NA	NA	0	0	0	0	0	0
AT1G04470	0	NA	NA	NA	NA	NA	0	0	0	0	0	0
AT1G04480	826.577	0.299426	0.329616	0.90841	0.363662	0.803171	824.075	826.338	572.716	1228.75	743.201	764.382
AT1G04490	11.5894	-0.834218	1.76816	-0.4718	0.63707	0.921174	17.1682	2.57159	24.848	0	13.7375	11.2109
AT1G04500	0	NA	NA	NA	NA	NA	0	0	0	0	0	0
AT1G04501	0	NA	NA	NA	NA	NA	0	0	0	0	0	0
AT1G04510	237.37	-0.564529	0.512275	-1.102	0.27046	0.742602	259.159	268.303	321.812	312.04	90.6678	172.241
AT1G04520	65.5062	-0.266939	1.19685	-0.223035	0.823508	0.970001	70.308	43.717	100.604	0	130.507	47.9013
AT1G04530	2108.33	0.209589	0.307977	0.680534	0.496167	0.871277	2163.2	1637.25	2064.81	3186.09	1942.49	1656.16
AT1G04540	8.45718	0.228785	2.28699	0.100038	0.920314	0.98911	11.4455	12.0008	0	0	10.99	16.3068
AT1G04550	174.157	-0.476379	1.73885	-0.273963	0.784113	0.96155	224.822	116.579	266.661	0	156.608	280.273
AT1G04555	145.759	0.154496	0.687424	0.224746	0.822177	0.970001	93.199	162.867	157.573	82.1157	314.59	64.2081
AT1G04560	0	NA	NA	NA	NA	NA	0	0	0	0	0	0
AT1G04570	45.5022	9.36107	1.53848	6.08462	1.17e-09	1.14e-06	0	0	0	155.273	49.4552	68.2848
AT1G04580	0.136256	-0.19541	4.08047	-0.047889	0.961805	NA	0.817535	0	0	0	0	0
AT1G04590	226.464	-0.0930255	0.483387	-0.192445	0.847393	0.973709	257.523	268.303	175.148	341.9	153.86	162.049
AT1G04600	1.63507	-3.7949	3.92738	-0.966269	0.333909	NA	9.81042	0	0	0	0	0
AT1G04610	95.3628	0.65453	0.916717	0.713993	0.475232	0.863902	50.6872	146.581	25.454	86.5948	23.3538	239.506
AT1G04620	100.885	0.190425	1.0358	0.183843	0.854137	0.974819	231.362	4.28598	47.2718	56.7345	93.4153	172.241
AT1G04625	0	NA	NA	NA	NA	NA	0	0	0	0	0	0
AT1G04630	457.572	-0.673492	0.346245	-1.94513	0.0517592	0.389567	513.412	607.752	567.262	300.096	282.993	473.917
AT1G04635	14.8925	0.220237	2.45383	0.0897523	0.928484	0.989966	32.7014	8.57197	0	0	48.0814	0
AT1G04640	423.321	0.675722	0.402468	1.67895	0.0931627	0.505727	282.049	239.158	455.749	689.772	480.814	392.383
AT1G04645	11.6265	-0.158647	3.00042	-0.052875	0.957831	0.994652	36.7891	0	0	0	32.9701	0
AT1G04650	5.43364	-3.80367	2.54161	-1.49656	0.134508	NA	9.81042	2.57159	18.1815	0	0	2.03835
AT1G04660	39.8535	-1.15176	1.34763	-0.854658	0.39274	0.821829	12.263	87.4341	65.4533	17.9162	0	56.0547
AT1G04670	0.497671	2.82169	4.02236	0.7015	0.482991	NA	0	0	0	2.98603	0	0
AT1G04680	939.986	-0.459962	0.284002	-1.61957	0.105324	0.531865	856.776	1287.51	1121.8	807.72	689.625	876.491
AT1G04684	0	NA	NA	NA	NA	NA	0	0	0	0	0	0
AT1G04690	1138.9	-0.14873	0.291154	-0.51083	0.60947	0.914486	1007.2	1168.36	1417.55	816.678	1164.94	1258.68
AT1G04700	8.15352	-2.93452	2.34195	-1.25302	0.210198	0.6852	0	19.7155	23.6359	1.49301	0	4.0767
AT1G04710	251.58	-0.102884	0.460255	-0.223537	0.823118	0.970001	266.516	300.019	215.753	129.892	288.488	308.81
AT1G04720	0	NA	NA	NA	NA	NA	0	0	0	0	0	0
AT1G04730	33.684	0.0499614	1.03893	0.0480894	0.961645	0.995188	42.5118	19.7155	36.969	13.4371	74.1827	15.2876
AT1G04750	1095.49	-0.300653	0.240787	-1.24863	0.211802	0.687279	1201.78	1182.93	1243.61	894.315	950.638	1099.69
AT1G04760	43.3169	-0.623626	1.30622	-0.477428	0.633058	0.920876	94.834	44.5742	18.1815	68.6786	0	33.6328
AT1G04770	927.875	-1.09531	0.531042	-2.06256	0.0391545	0.342725	1524.7	1381.8	887.255	179.162	471.198	1123.13
AT1G04778	0.279122	-1.2289	4.02704	-0.305163	0.760242	NA	0.817535	0.857197	0	0	0	0
AT1G04780	582.371	0.360581	0.396835	0.908641	0.36354	0.803171	721.066	411.454	396.962	856.99	682.756	424.996
AT1G04790	245.038	0.0235802	0.423945	0.055621	0.955644	0.994256	198.661	216.014	313.933	320.998	192.326	228.295
AT1G04800	6.66689	-1.81617	2.40841	-0.754096	0.450792	0.850444	16.3507	2.57159	12.121	8.95808	0	0
AT1G04810	433.095	-0.314544	0.353192	-0.890573	0.373158	0.808849	514.229	527.176	399.992	303.082	347.56	506.53
AT1G04820	3268.36	0.159366	0.301336	0.528864	0.5969	0.911146	2778.8	3255.63	3230.85	2915.86	2476.88	4952.18
AT1G04830	483.168	0.387013	0.307761	1.25751	0.208568	0.683926	492.156	381.453	382.417	594.219	568.734	480.032
AT1G04840	11.0644	-1.44548	1.73178	-0.83468	0.403898	0.830442	26.9786	13.7151	7.87863	0	13.7375	4.0767
AT1G04850	1224.2	0.314301	0.306725	1.0247	0.305505	0.77344	1179.7	960.06	1133.31	1817	1289.96	965.16
AT1G04860	245.316	0.579075	0.393312	1.47231	0.140938	0.59656	228.91	187.726	173.33	358.323	291.236	232.372
AT1G04870	206.648	0.592891	0.406489	1.45856	0.144685	0.60229	183.945	161.153	149.088	247.84	298.105	199.758
AT1G04880	0	NA	NA	NA	NA	NA	0	0	0	0	0	0
AT1G04890	0	NA	NA	NA	NA	NA	0	0	0	0	0	0
AT1G04900	43.8198	0.400755	0.79648	0.503158	0.614853	0.916468	57.2274	30.0019	26.0601	55.2415	57.6977	36.6903
AT1G04910	292.882	0.0168829	0.407371	0.0414436	0.966942	0.995901	348.27	276.875	249.086	262.77	215.679	404.613
AT1G04920	2.67772	-3.42175	3.78404	-0.90426	0.365858	NA	0	2.57159	12.121	0	1.37375	0
AT1G04930	50.5435	0.937841	1.137	0.824835	0.409465	0.832487	45.7819	43.717	14.5452	137.357	2.74751	59.1122
AT1G04940	365.991	2.30818	0.663357	3.47955	0.000502263	0.0303497	144.704	108.864	115.149	1106.32	629.18	91.7258
AT1G04945	28.7899	0.374261	1.18928	0.314695	0.752994	0.953276	22.891	42.0026	10.3028	71.6646	5.49502	20.3835
AT1G04950	346.57	0.475382	0.421239	1.12853	0.259095	0.734605	214.194	400.311	255.753	471.792	266.508	470.859
AT1G04960	976.305	0.231029	0.394461	0.585683	0.558089	0.895955	850.236	977.204	866.65	1236.22	1438.32	489.204
AT1G04970	610.934	-0.133083	0.319348	-0.416734	0.676873	0.933074	533.033	580.322	803.015	692.758	559.118	497.358
AT1G04980	180.154	0.472667	0.556655	0.849119	0.395815	0.823703	87.4762	213.442	151.512	329.956	149.739	148.8
AT1G04985	817.113	0.150661	0.30876	0.487955	0.625582	0.919679	808.542	716.616	797.56	851.018	1107.25	621.697
AT1G04990	526.604	0.13915	0.310724	0.447827	0.654278	0.924964	405.497	600.895	497.566	491.201	586.593	577.873
AT1G05000	64.9539	-0.191125	0.72619	-0.263188	0.792405	0.96296	63.7677	66.0041	77.5742	94.0598	61.819	26.4986
AT1G05010	1330.18	0.890948	0.370713	2.40334	0.0162463	0.226877	673.649	1147.79	973.92	2357.47	1855.94	972.294
AT1G05020	101	0.718972	0.806243	0.891757	0.372523	0.80858	56.4099	94.2916	78.1803	250.826	23.3538	102.937
AT1G05030	104.181	0.433647	0.563061	0.77016	0.441205	0.846451	103.827	92.5772	69.6956	144.822	75.5565	138.608
AT1G05040	5.45854	1.34562	3.06752	0.438666	0.660904	NA	2.4526	6.85757	0	0	0	23.441
AT1G05055	209.245	0.642806	0.539516	1.19145	0.233477	0.708377	73.5781	244.301	172.118	256.798	324.206	184.471
AT1G05060	270.067	-0.0951036	0.444357	-0.214025	0.830527	0.971272	237.085	274.303	324.842	267.249	364.045	152.876
AT1G05061	1.3589	4.31072	3.9484	1.09176	0.274938	NA	0	0	0	0	0	8.15341
AT1G05065	21.6869	0.968802	1.36001	0.712351	0.476247	0.863927	2.4526	13.7151	27.8782	7.46507	12.3638	66.2464
AT1G05070	714.291	-0.181882	0.384678	-0.472817	0.636344	0.921174	918.909	524.604	833.317	761.437	848.98	398.498
AT1G05080	0	NA	NA	NA	NA	NA	0	0	0	0	0	0
AT1G05085	0	NA	NA	NA	NA	NA	0	0	0	0	0	0
AT1G05090	35.2459	-0.152659	0.87966	-0.173544	0.862224	0.976885	40.0592	36.8595	34.5448	14.9301	45.3339	39.7479
AT1G05100	958.45	1.53487	0.408505	3.75729	0.000171764	0.014891	245.26	456.886	772.712	1249.65	1311.94	1714.25
AT1G05120	188.57	0.922501	0.570031	1.61833	0.105591	0.532107	125.9	186.012	78.7863	400.128	206.063	134.531
AT1G05135	863.577	1.13041	0.417359	2.70849	0.0067591	0.141028	341.73	676.328	606.049	1866.27	936.901	754.19
AT1G05136	0	NA	NA	NA	NA	NA	0	0	0	0	0	0
AT1G05140	469.797	-0.504749	0.35559	-1.41947	0.155763	0.617963	617.239	500.603	536.353	383.704	269.256	511.626
AT1G05150	192.723	-0.237137	0.430853	-0.550389	0.582052	0.90603	211.742	188.583	224.844	234.403	142.87	153.896
AT1G05160	160.647	-0.403549	0.700913	-0.575747	0.564786	0.898902	243.625	186.869	118.786	28.3673	217.053	169.183
AT1G05170	543.31	-0.060705	0.386113	-0.157221	0.875071	0.979927	764.395	424.312	476.354	425.509	435.48	733.807
AT1G05180	313.176	0.216553	0.371949	0.582213	0.560423	0.897282	295.948	245.158	327.872	267.249	425.864	316.964
AT1G05190	6988.67	0.603248	0.288004	2.09458	0.0362081	0.331545	6540.28	4809.73	5294.44	11173.7	8352.43	5761.4
AT1G05200	432.624	-0.582439	0.377209	-1.54408	0.12257	0.565822	677.736	468.029	410.901	255.305	442.349	341.424
AT1G05205	222.878	0.0275536	0.50477	0.0545864	0.956468	0.994635	346.635	145.723	169.694	309.054	182.709	183.452
AT1G05210	63.693	1.14968	0.783815	1.46677	0.142439	0.59876	38.4241	24.8587	55.1504	158.259	45.3339	60.1314
AT1G05220	13.0108	1.63064	1.65263	0.986693	0.323793	0.784229	0	11.1436	7.87863	22.3952	27.4751	9.17258
AT1G05230	130.457	0.388104	0.544729	0.712471	0.476173	0.863902	77.6658	156.01	105.452	107.497	200.568	135.55
AT1G05240	2.8489	2.04862	2.77122	0.73925	0.459755	NA	1.63507	1.71439	0	8.95808	2.74751	2.03835
AT1G05250	0.545023	-2.20523	3.96843	-0.555694	0.57842	NA	3.27014	0	0	0	0	0
AT1G05260	0	NA	NA	NA	NA	NA	0	0	0	0	0	0
AT1G05270	512.816	0.0800315	0.334919	0.238958	0.811138	0.967286	475.805	497.174	523.02	371.76	664.897	544.24
AT1G05280	0	NA	NA	NA	NA	NA	0	0	0	0	0	0
AT1G05290	1.46338	-0.866164	3.87444	-0.223559	0.823101	NA	5.72274	0	0	0	0	3.05753
AT1G05291	0	NA	NA	NA	NA	NA	0	0	0	0	0	0
AT1G05300	30.2788	-0.792837	1.49905	-0.528891	0.596881	0.911146	8.17535	50.5746	56.3625	0	60.4452	6.11506
AT1G05310	98.655	-1.18707	2.75316	-0.431164	0.666349	0.928684	196.208	0	215.147	0	48.0814	132.493
AT1G05320	198.225	0.129656	0.488342	0.265503	0.790622	0.962481	107.097	206.584	253.934	192.599	256.892	172.241
AT1G05330	92.3608	-1.20284	0.598548	-2.0096	0.0444736	0.363615	122.63	150.867	113.331	32.8463	59.0714	75.419
AT1G05340	1560.85	0.455913	0.38844	1.1737	0.240515	0.715747	717.796	1816.4	1414.52	1315.34	2534.58	1566.47
AT1G05350	722.908	0.110433	0.294261	0.375289	0.707446	0.943536	606.611	693.472	785.439	630.052	913.547	708.327
AT1G05360	194.211	-0.133535	0.440362	-0.303239	0.761708	0.954708	156.967	215.156	236.965	237.389	168.972	149.819
AT1G05370	40.3133	-1.05283	1.24946	-0.842628	0.399436	0.826728	30.2488	62.5754	70.3017	52.2555	0	26.4986
AT1G05380	190.299	0.143115	0.489117	0.2926	0.769828	0.958157	170.865	211.728	160.603	182.148	120.89	295.561
AT1G05385	487.198	0.36358	0.328401	1.10712	0.268241	0.739714	508.507	409.74	359.993	549.429	651.16	444.361
AT1G05390	0	NA	NA	NA	NA	NA	0	0	0	0	0	0
AT1G05400	7.73024	1.0882	2.80698	0.387676	0.698256	0.94056	3.27014	0	11.5149	0	31.5964	0
AT1G05410	119.989	-0.48189	0.615922	-0.782387	0.433987	0.842918	162.689	161.153	96.3617	77.6367	54.9502	167.145
AT1G05420	4.57562	0.788738	3.20976	0.245731	0.805891	NA	3.27014	6.85757	0	0	0	17.326
AT1G05430	289.519	-0.821486	0.404254	-2.0321	0.0421431	0.353773	360.533	400.311	347.872	219.473	273.377	135.55
AT1G05440	0	NA	NA	NA	NA	NA	0	0	0	0	0	0
AT1G05450	0	NA	NA	NA	NA	NA	0	0	0	0	0	0
AT1G05460	59.8559	0.290383	0.659687	0.440183	0.659805	0.926414	58.8625	54.8606	47.8778	79.1297	48.0814	70.3231
AT1G05470	36.9904	-1.79445	1.33371	-1.34546	0.178477	0.650274	9.81042	52.289	110.301	0	26.1013	23.441
AT1G05490	2.03835	4.89122	3.93467	1.24311	0.213827	NA	0	0	0	0	0	12.2301
AT1G05500	578.114	-0.204533	0.422008	-0.484666	0.627913	0.920015	572.274	814.337	471.506	280.687	583.846	746.037
AT1G05510	7.02684	-4.90599	2.79568	-1.75485	0.0792855	0.470995	11.4455	0	29.6964	0	0	1.01918
AT1G05520	152.546	-0.435539	0.470046	-0.926587	0.354141	0.797526	203.566	167.153	155.755	92.5668	156.608	139.627
AT1G05530	0	NA	NA	NA	NA	NA	0	0	0	0	0	0
AT1G05540	29.0252	-3.1891	1.19765	-2.6628	0.00774941	0.14966	47.417	41.1454	68.4835	0	10.99	6.11506
AT1G05550	4.51805	-5.26536	3.54223	-1.48645	0.13716	NA	0	7.71477	19.3936	0	0	0
AT1G05560	117.244	0.615583	0.640775	0.960685	0.336711	0.790688	112.002	84.8625	80.6045	241.868	125.012	59.1122
AT1G05562	0	NA	NA	NA	NA	NA	0	0	0	0	0	0
AT1G05570	34.4975	0.211552	0.92948	0.227602	0.819955	0.969926	24.526	21.4299	49.696	41.8044	52.2027	17.326
AT1G05575	401.559	-0.544461	0.43452	-1.25302	0.2102	0.6852	247.713	630.897	550.898	344.886	252.771	382.191
AT1G05577	0.101008	-0.19541	4.08047	-0.047889	0.961805	NA	0	0	0.606049	0	0	0
AT1G05580	4.78878	-5.34656	3.55503	-1.50394	0.132596	NA	26.1611	2.57159	0	0	0	0
AT1G05590	111.44	-0.186607	1.10557	-0.168788	0.865963	0.977631	148.791	126.008	81.2105	159.752	0	152.876
AT1G05600	64.173	0.982167	0.734194	1.33775	0.180978	0.65279	34.3365	32.5735	62.423	41.8044	114.022	99.8792
AT1G05610	3.10687	4.48675	3.58659	1.25098	0.210942	NA	0	0	0.606049	0	2.74751	15.2876
AT1G05615	0	NA	NA	NA	NA	NA	0	0	0	0	0	0
AT1G05620	243.22	0.422315	0.403623	1.04631	0.295418	0.764527	195.391	207.442	221.208	244.854	218.427	371.999
AT1G05630	204.392	-0.272167	0.535619	-0.508136	0.611358	0.915133	159.419	250.301	261.813	104.511	141.497	308.81
AT1G05640	6.497	-0.153689	2.61555	-0.0587596	0.953144	0.9936	0.817535	18.0011	1.81815	0	0	18.3452
AT1G05650	0	NA	NA	NA	NA	NA	0	0	0	0	0	0
AT1G05660	0.391702	0.766371	4.08047	0.187814	0.851022	NA	0	0.857197	0	1.49301	0	0
AT1G05670	271.889	0.295645	0.498828	0.592679	0.553396	0.893206	262.429	334.307	135.755	437.453	192.326	269.062
AT1G05675	2856.16	0.817482	0.279083	2.92917	0.00339866	0.0946521	2043.02	2365.01	1796.33	4284.95	2537.32	4110.34
AT1G05680	288.891	-1.21544	0.576452	-2.10849	0.0349889	0.325832	549.383	238.301	423.022	323.984	118.143	80.5149
AT1G05690	102.864	1.15905	0.854009	1.35719	0.17472	0.645229	19.6208	78.0049	93.3315	26.8742	173.093	226.257
AT1G05700	1.2858	-3.44539	3.93301	-0.87602	0.381019	NA	0	7.71477	0	0	0	0
AT1G05710	140.358	-0.103246	0.470424	-0.219475	0.82628	0.970816	115.272	185.154	135.755	134.371	140.123	131.474
AT1G05720	410.121	-0.0109404	0.30836	-0.0354792	0.971698	0.9972	455.367	370.309	409.083	441.932	403.884	380.153
AT1G05730	4.35022	5.97419	3.91996	1.52404	0.127498	NA	0	0	0	0	26.1013	0
AT1G05740	0	NA	NA	NA	NA	NA	0	0	0	0	0	0
AT1G05750	24.1511	0.853204	1.41897	0.601285	0.54765	0.891146	15.5332	18.0011	18.1815	0	41.2126	51.978
AT1G05760	0	NA	NA	NA	NA	NA	0	0	0	0	0	0
AT1G05770	3.58252	2.27711	3.80209	0.598911	0.549232	NA	0	0	3.63629	0	17.8588	0
AT1G05780	191.282	0.912343	0.527521	1.72949	0.0837212	0.481335	151.244	98.5776	147.876	350.858	278.872	120.263
AT1G05785	237.76	-0.135754	0.430672	-0.315213	0.7526	0.952963	292.677	224.586	229.692	153.78	307.721	218.104
AT1G05790	258.64	0.322681	0.414278	0.778898	0.43604	0.843892	224.822	227.157	236.965	404.607	251.397	206.893
AT1G05800	0	NA	NA	NA	NA	NA	0	0	0	0	0	0
AT1G05805	524.262	0.206228	0.332998	0.619308	0.535713	0.886102	404.68	540.034	515.747	450.89	722.595	511.626
AT1G05810	136.053	0.62634	0.597021	1.04911	0.294128	0.764049	52.3222	169.725	98.7859	177.669	204.689	113.129
AT1G05820	25.2528	-0.803041	1.05076	-0.764248	0.44472	0.848223	13.0806	54.8606	28.4843	13.4371	19.2326	22.4219
AT1G05830	531.839	0.249817	0.386681	0.646054	0.518244	0.880491	462.725	567.464	428.476	504.638	373.661	854.069
AT1G05835	53.3683	0.19175	0.853673	0.224618	0.822277	0.970001	20.4384	59.1466	69.6956	95.5529	27.4751	47.9013
AT1G05840	326.508	-0.321706	0.374461	-0.859115	0.390277	0.821039	327.831	445.742	315.145	313.533	218.427	338.366
AT1G05850	6037.68	-0.598057	0.329444	-1.81535	0.0694696	0.44616	5797.96	7923.07	8094.99	3720.59	3361.58	7327.87
AT1G05860	207.383	-0.0743365	0.492171	-0.151038	0.879946	0.980207	172.5	229.729	236.359	103.018	241.781	260.909
AT1G05870	727.681	0.372337	0.44001	0.846201	0.397441	0.825278	703.897	438.885	759.985	406.1	1305.07	752.152
AT1G05880	0.248836	1.72814	4.08047	0.423516	0.671919	NA	0	0	0	1.49301	0	0
AT1G05890	756.017	0.275107	0.308577	0.891536	0.372642	0.808618	643.4	662.613	746.046	688.279	1097.63	698.135
AT1G05894	20.0383	0.986177	1.67416	0.589056	0.555824	0.894378	24.526	0	15.7573	4.47904	67.314	8.15341
AT1G05900	327.951	-0.419602	0.456725	-0.918718	0.358243	0.800458	445.556	349.736	331.509	138.85	299.478	402.574
AT1G05910	159.092	0.0363793	0.562302	0.0646971	0.948415	0.992263	114.455	198.87	157.573	158.259	245.902	79.4957
AT1G05920	3.14197	0.654089	3.15658	0.207214	0.835843	NA	7.35781	0	0	2.98603	1.37375	7.13423
AT1G05925	0	NA	NA	NA	NA	NA	0	0	0	0	0	0
AT1G05930	7.90316	-1.33869	1.95846	-0.683541	0.494265	0.870976	17.9858	13.7151	2.42419	0	4.12126	9.17258
AT1G05940	439.609	-0.874358	0.351011	-2.49097	0.0127394	0.19996	587.807	567.464	552.11	319.505	214.306	396.459
AT1G05950	37.578	-0.383094	1.30619	-0.293292	0.769299	0.958093	72.7606	36.8595	18.1815	0	46.7077	50.9588
AT1G05960	383.527	0.390426	0.378485	1.03155	0.302283	0.771036	348.27	344.593	303.024	564.359	280.246	460.668
AT1G05970	319.168	0.544464	0.38284	1.42217	0.154976	0.61746	188.851	282.875	306.661	443.425	391.52	301.676
AT1G05980	0	NA	NA	NA	NA	NA	0	0	0	0	0	0
AT1G05990	0.953791	-3.01558	3.94207	-0.764976	0.444286	NA	5.72274	0	0	0	0	0
AT1G06000	175.277	0.79631	0.433186	1.83826	0.0660238	0.434693	112.002	156.867	115.755	200.064	206.063	260.909
AT1G06002	0.558244	-2.23751	3.96708	-0.56402	0.572741	NA	1.63507	1.71439	0	0	0	0
AT1G06010	58.2948	0.106048	1.2025	0.0881891	0.929726	0.990093	73.5781	41.1454	53.9383	0	65.9402	115.167
AT1G06020	8.6739	-1.91228	2.21067	-0.86502	0.387028	0.818466	8.99288	6.00038	26.0601	0	10.99	0
AT1G06030	28.3032	-0.321753	1.19667	-0.268874	0.788027	0.962038	37.6066	48.8602	7.87863	8.95808	56.3239	10.1918
AT1G06040	4293.56	-0.356824	0.237601	-1.50178	0.133155	0.584207	4967.34	4369.13	5130.2	3323.45	3325.86	4645.4
AT1G06050	145.008	-0.902274	0.578605	-1.55939	0.118903	0.558564	229.727	191.155	146.664	46.2834	100.284	155.934
AT1G06060	390.007	-0.342954	0.398666	-0.860255	0.389649	0.820386	503.601	381.453	424.234	301.589	230.791	498.377
AT1G06070	284.195	-0.299677	0.369861	-0.81024	0.417802	0.836301	336.824	311.162	292.722	313.533	199.194	251.736
AT1G06080	146.352	-1.00234	0.588475	-1.70328	0.0885154	0.49615	176.588	172.297	237.571	44.7904	83.799	163.068
AT1G06090	0	NA	NA	NA	NA	NA	0	0	0	0	0	0
AT1G06100	3.8881	-5.04866	3.21831	-1.56873	0.11671	NA	0.817535	8.57197	13.9391	0	0	0
AT1G06110	843.478	0.0153686	0.282299	0.0544411	0.956584	0.994652	927.902	761.191	828.469	665.884	920.415	957.006
AT1G06120	1.7269	0.553028	3.83204	0.144317	0.88525	NA	0.817535	3.42879	0	0	0	6.11506
AT1G06130	1427.28	0.429996	0.300175	1.43249	0.152005	0.614275	1066.07	1278.08	1304.22	2014.07	1100.38	1800.88
AT1G06135	39.0472	0.600763	1.3279	0.452418	0.650968	0.924121	34.3365	9.42916	49.0899	128.399	10.99	2.03835
AT1G06137	7.21623	6.70332	3.62416	1.84962	0.0643682	0.43032	0	0	0	43.2974	0	0
AT1G06140	16.0001	1.3204	1.9875	0.664353	0.506465	0.876776	0	17.1439	10.3028	0	56.3239	12.2301
AT1G06148	8.46619	-0.364226	2.25553	-0.161481	0.871714	0.97905	25.3436	2.57159	0.606049	20.9022	1.37375	0
AT1G06149	0	NA	NA	NA	NA	NA	0	0	0	0	0	0
AT1G06150	14.329	-3.9344	2.33916	-1.68197	0.0925748	0.505113	11.4455	69.4329	0	0	0	5.09588
AT1G06160	63.1364	-0.277786	0.865092	-0.321105	0.74813	0.95275	39.2417	112.293	55.7565	103.018	52.2027	16.3068
AT1G06170	0	NA	NA	NA	NA	NA	0	0	0	0	0	0
AT1G06180	58.5782	-0.0793141	0.685061	-0.115777	0.90783	0.987746	48.2346	48.003	84.2408	59.7205	48.0814	63.1889
AT1G06190	1489.84	0.469138	0.308614	1.52014	0.128475	0.575212	1310.51	1306.37	1131.49	2242.51	1827.09	1121.09
AT1G06200	1377.7	0.316988	0.281806	1.12485	0.260654	0.736024	1171.53	1248.94	1259.37	1952.86	1504.26	1129.25
AT1G06210	563.91	0.0857807	0.465282	0.184363	0.853729	0.974695	677.736	511.746	452.112	268.742	980.861	492.262
AT1G06220	389.997	-1.30937	0.488043	-2.68289	0.00729886	0.14603	584.537	480.887	603.018	167.217	109.9	394.421
AT1G06225	0	NA	NA	NA	NA	NA	0	0	0	0	0	0
AT1G06230	385.53	0.278479	0.349141	0.797611	0.425096	0.839115	419.395	323.163	302.418	500.159	432.733	335.309
AT1G06240	353.386	-0.00122384	0.445291	-0.00274841	0.997807	0.999604	493.791	327.449	239.995	368.774	218.427	471.878
AT1G06250	55.9736	-1.11156	0.795372	-1.39753	0.162253	0.627767	82.571	41.1454	105.452	52.2555	37.0914	17.326
AT1G06260	0	NA	NA	NA	NA	NA	0	0	0	0	0	0
AT1G06265	54.5421	-0.979045	0.832542	-1.17597	0.239607	0.714551	55.5924	95.1488	66.6654	10.4511	49.4552	49.9396
AT1G06270	15.1714	-0.848232	1.97906	-0.428603	0.668212	0.929	0	24.0015	34.5448	0	19.2326	13.2493
AT1G06280	2.18009	-4.21055	3.92223	-1.07351	0.283043	NA	13.0806	0	0	0	0	0
AT1G06290	210.821	-0.177638	0.427803	-0.415232	0.677972	0.933147	179.858	240.015	250.904	243.361	206.063	144.723
AT1G06310	0	NA	NA	NA	NA	NA	0	0	0	0	0	0
AT1G06320	0.272512	-1.19867	4.02955	-0.297469	0.766108	NA	1.63507	0	0	0	0	0
AT1G06330	0.169863	1.72814	4.08047	0.423516	0.671919	NA	0	0	0	0	0	1.01918
AT1G06340	9.91518	-1.03374	2.15176	-0.480414	0.630933	0.920723	20.4384	5.14318	14.5452	0	0	19.3643
AT1G06350	0	NA	NA	NA	NA	NA	0	0	0	0	0	0
AT1G06360	222.803	0.00672235	0.685714	0.00980343	0.992178	0.998914	53.9573	216.871	395.75	319.505	107.153	243.583
AT1G06370	334.072	0.672018	0.359401	1.86983	0.0615078	0.422991	238.72	222.014	311.509	483.736	412.126	336.328
AT1G06380	67.5215	0.887815	0.85417	1.03939	0.298624	0.767839	20.4384	48.003	73.3319	135.864	103.032	24.4602
AT1G06390	1180.18	-0.0124938	0.240916	-0.0518595	0.958641	0.994652	1110.21	1352.66	1093.31	1139.17	1211.65	1174.09
AT1G06400	1486.36	-0.0427296	0.231848	-0.1843	0.853778	0.974695	1557.4	1392.09	1575.12	1416.87	1633.39	1343.27
AT1G06410	2375.64	0.38078	0.279658	1.36159	0.173326	0.64362	1639.97	2414.72	2136.32	2968.11	3099.19	1995.55
AT1G06420	150.901	1.53071	0.74165	2.06392	0.0390251	0.342671	136.528	47.1458	49.0899	444.918	72.809	154.915
AT1G06430	1211.79	-0.6686	0.283951	-2.35464	0.0185409	0.241099	1693.93	1380.09	1390.28	812.199	788.535	1205.69
AT1G06440	13.3301	1.63972	2.06702	0.793274	0.427618	0.840344	0	14.5723	4.84839	35.8323	24.7276	0
AT1G06450	67.5343	-0.535983	0.83151	-0.64459	0.519193	0.880565	31.8839	108.864	99.392	19.4092	54.9502	90.7067
AT1G06460	1164.69	-0.862547	0.343938	-2.50786	0.0121465	0.19558	1581.11	1392.09	1536.94	576.303	651.16	1250.53
AT1G06470	356.437	0.63232	0.46407	1.36255	0.173023	0.643096	250.166	247.73	340.599	226.938	690.998	382.191
AT1G06475	29.7595	1.20428	1.18608	1.01534	0.309944	0.776934	3.27014	6.85757	43.6355	47.7764	53.5764	23.441
AT1G06480	0	NA	NA	NA	NA	NA	0	0	0	0	0	0
AT1G06490	13.3764	-0.284786	2.09067	-0.136218	0.891649	0.984365	30.2488	0	13.9391	0	5.49502	30.5753
AT1G06500	134.774	-0.120319	0.537322	-0.223923	0.822817	0.970001	108.732	108.864	203.632	117.948	100.284	169.183
AT1G06510	433.2	0.294007	0.365578	0.804223	0.421268	0.837743	368.708	303.448	495.142	373.253	603.078	455.572
AT1G06515	798.852	0.180576	0.364026	0.496052	0.619858	0.917625	582.085	791.193	873.316	1103.34	505.542	937.642
AT1G06520	56.4538	-0.565627	1.23718	-0.45719	0.647534	0.92348	31.8839	110.578	59.9988	0	34.3439	101.918
AT1G06530	674.376	0.696645	0.342476	2.03414	0.041937	0.353415	442.286	484.316	616.352	1039.14	906.678	557.489
AT1G06540	25.6996	1.28493	1.84166	0.697699	0.485365	0.867973	0	6.00038	38.7871	0	64.5665	44.8437
AT1G06550	320.858	0.222295	0.475415	0.46758	0.640085	0.922283	256.706	324.02	307.873	477.764	151.113	407.67
AT1G06560	130.817	0.174627	0.552885	0.315847	0.752118	0.95275	64.5852	155.153	149.088	123.92	125.012	167.145
AT1G06570	1732.03	-0.721621	0.236889	-3.04624	0.00231721	0.0765859	2096.98	2157.56	2213.9	1546.76	1158.08	1218.93
AT1G06580	48.1108	-0.57179	1.2336	-0.463515	0.642996	0.923048	55.5924	54.8606	62.423	0	26.1013	89.6875
AT1G06590	57.1015	-0.448207	1.00932	-0.444069	0.656993	0.926061	58.8625	19.7155	119.392	23.8882	13.7375	107.013
AT1G06610	0	NA	NA	NA	NA	NA	0	0	0	0	0	0
AT1G06620	798.616	0.749989	0.478951	1.5659	0.117372	0.556202	298.4	774.906	713.925	480.75	964.376	1559.34
AT1G06630	796.879	0.544279	0.288829	1.88443	0.0595062	0.417143	660.568	523.747	760.591	809.213	975.366	1051.79
AT1G06640	2946.04	0.706672	0.352878	2.0026	0.0452205	0.365396	1118.39	2811.61	2785.4	3459.31	4214.68	3286.84
AT1G06645	940.193	0.512905	0.316787	1.61909	0.105429	0.532104	826.528	841.767	656.351	834.594	1497.39	984.524
AT1G06650	1818.73	-0.533316	0.271025	-1.96777	0.0490939	0.379762	2131.31	2247.57	2075.72	1070.49	1589.43	1797.83
AT1G06660	18.4883	-0.213635	1.316	-0.162336	0.871041	0.97893	13.8981	14.5723	30.9085	17.9162	31.5964	2.03835
AT1G06670	271.994	0.35103	0.387801	0.905181	0.36537	0.803962	299.218	182.583	235.147	312.04	342.065	260.909
AT1G06680	61860.4	0.262818	0.23426	1.12191	0.261902	0.73623	61495	49052.2	58175.8	83729.7	57396.8	61312.6
AT1G06690	683.277	-0.0685026	0.269895	-0.253812	0.799641	0.964596	766.03	730.332	602.412	653.94	685.503	661.445
AT1G06700	963.506	0.413759	0.263643	1.56939	0.116557	0.554098	733.329	900.057	846.044	998.826	1016.58	1286.2
AT1G06710	5.17049	-5.4577	3.38916	-1.61034	0.107324	NA	0	23.1443	7.87863	0	0	0
AT1G06720	126.54	0.260871	0.490423	0.531931	0.594774	0.910767	125.9	132.865	86.665	153.78	138.749	121.282
AT1G06730	170.261	0.268297	0.432589	0.620213	0.535118	0.886102	180.675	122.579	159.997	207.529	174.467	176.317
AT1G06740.1	11.3616	1.29094	1.80437	0.71545	0.474331	0.86386	3.27014	6.85757	9.69678	0	9.61628	38.7287
AT1G06750	6.02305	-2.16276	2.14004	-1.01062	0.3122	0.777585	3.27014	9.42916	16.9694	0	1.37375	5.09588
AT1G06760	379.222	-0.279678	0.43179	-0.647717	0.517168	0.880098	418.578	234.872	593.928	376.239	262.387	389.325
AT1G06770	104.715	1.56044	0.681117	2.291	0.0219637	0.263604	82.571	20.5727	55.7565	158.259	214.306	96.8217
AT1G06780	280.863	0.19272	0.531733	0.362438	0.717025	0.945721	377.701	288.018	120.604	455.369	233.538	209.95
AT1G06790	42.6823	-0.407609	0.935664	-0.435636	0.663101	0.927996	64.5852	29.1447	52.1202	68.6786	10.99	30.5753
AT1G06800	141.795	0.269622	0.634238	0.425112	0.670755	0.930673	83.3885	167.153	135.755	79.1297	103.032	282.312
AT1G06810	3.33001	-1.74679	3.6158	-0.483098	0.629026	NA	0	15.4295	0	1.49301	0	3.05753
AT1G06820	461.261	0.0290727	0.402512	0.0722282	0.94242	0.991338	480.71	365.166	523.02	692.758	405.258	300.657
AT1G06830	14.5718	1.86361	1.52883	1.21898	0.222853	0.698263	0.817535	16.2867	1.81815	38.8183	12.3638	17.326
AT1G06840	237.76	0.318985	0.605351	0.526943	0.598233	0.911189	93.199	269.16	272.722	226.938	118.143	446.399
AT1G06850	250.241	0.717096	0.437131	1.64046	0.100909	0.522426	222.369	210.87	135.149	209.022	384.651	339.386
AT1G06860	0	NA	NA	NA	NA	NA	0	0	0	0	0	0
AT1G06870	270.922	-0.253615	0.381734	-0.664376	0.506449	0.876776	350.722	314.591	218.784	253.812	262.387	225.238
AT1G06880	0.944321	-3.01444	3.94209	-0.76468	0.444462	NA	0.817535	0	4.84839	0	0	0
AT1G06890	198.045	0.83816	0.517497	1.61964	0.105309	0.531865	166.777	116.579	142.421	379.225	256.892	126.378
AT1G06900	319.605	0.555323	0.452446	1.22738	0.21968	0.695132	329.467	173.154	273.328	452.383	471.198	218.104
AT1G06910	111.385	-0.425732	0.690656	-0.616416	0.53762	0.887396	55.5924	153.438	173.936	52.2555	160.729	72.3615
AT1G06920	1.36256	-3.53139	3.93149	-0.898231	0.369063	NA	8.17535	0	0	0	0	0
AT1G06923	0	NA	NA	NA	NA	NA	0	0	0	0	0	0
AT1G06925	0.142866	-0.19541	4.08047	-0.047889	0.961805	NA	0	0.857197	0	0	0	0
AT1G06930	9.47504	4.10653	2.6029	1.57768	0.11464	0.551445	0	0	3.03024	50.7625	0	3.05753
AT1G06950	1018.19	0.178793	0.288741	0.619216	0.535774	0.886102	1073.42	970.347	821.196	1286.98	1134.72	822.475
AT1G06960	396.085	0.0768305	0.351001	0.21889	0.826736	0.970898	465.177	332.592	359.387	312.04	431.359	475.955
AT1G06970	13.1593	1.02552	1.80506	0.568137	0.569942	0.901848	16.3507	8.57197	1.2121	0	15.1113	37.7095
AT1G06980	33.1433	-0.801178	1.13789	-0.704093	0.481375	0.865957	49.0521	42.8598	34.5448	34.3393	1.37375	36.6903
AT1G06990	5.1271	0.204923	3.09658	0.0661772	0.947237	NA	0	9.42916	4.84839	0	16.4851	0
AT1G07000	988.98	0.440976	0.396882	1.1111	0.266526	0.738437	604.976	829.766	1081.19	1769.22	946.517	702.212
AT1G07010	761.227	-1.01647	0.41464	-2.45145	0.0142282	0.212735	1139.64	1019.21	898.77	223.952	590.714	695.078
AT1G07020	501.741	0.463062	0.354041	1.30793	0.190896	0.66325	340.912	475.744	449.688	438.946	527.522	777.631
AT1G07025	0.514691	-0.296888	4.02463	-0.0737678	0.941195	NA	0	1.71439	0	0	1.37375	0
AT1G07030	314.693	-0.0109876	0.450453	-0.0243922	0.98054	0.997794	238.72	315.448	392.72	483.736	244.528	213.008
AT1G07040	289.369	-0.246937	0.447275	-0.552092	0.580885	0.905517	448.827	262.302	230.905	364.295	200.568	229.315
AT1G07050	17.082	2.23647	2.28837	0.977321	0.32841	0.78598	17.9858	0	0	0	54.9502	29.5561
AT1G07051	0.509588	2.91579	4.01518	0.72619	0.467722	NA	0	0	0	0	0	3.05753
AT1G07060	0	NA	NA	NA	NA	NA	0	0	0	0	0	0
AT1G07070	176.782	1.39519	0.722507	1.93105	0.0534775	0.39526	87.4762	74.5761	129.694	570.331	114.022	84.5916
AT1G07080	4141.18	-0.216398	0.204534	-1.058	0.290054	0.760674	4483.36	4129.97	4740.51	3763.89	3573.14	4156.2
AT1G07090	32.9444	-1.26085	1.30362	-0.967189	0.333449	0.789151	20.4384	48.8602	70.3017	22.3952	0	35.6712
AT1G07100	0.169863	1.72814	4.08047	0.423516	0.671919	NA	0	0	0	0	0	1.01918
AT1G07110	2735.03	0.0680321	0.250385	0.27171	0.785845	0.961839	2640.64	2755.03	2615.1	3568.3	2468.64	2362.45
AT1G07119	0.136256	-0.19541	4.08047	-0.047889	0.961805	NA	0.817535	0	0	0	0	0
AT1G07120	0	NA	NA	NA	NA	NA	0	0	0	0	0	0
AT1G07128	27.3294	2.09819	0.9284	2.26001	0.0238206	0.273578	11.4455	11.1436	8.48468	47.7764	49.4552	35.6712
AT1G07130	19.248	1.74094	1.38968	1.25276	0.210292	0.6852	13.8981	10.2864	2.42419	59.7205	26.1013	3.05753
AT1G07135	11344.9	0.576096	0.340461	1.6921	0.0906262	0.50063	6044.85	9327.16	11954.9	16282.8	16340.8	8118.76
AT1G07140	1575.07	-0.352601	0.256345	-1.37549	0.168979	0.637322	1779.77	1949.27	1571.48	1472.11	1107.25	1570.55
AT1G07150	155.906	0.337354	0.654595	0.515363	0.606299	0.913332	61.3151	236.586	115.149	274.714	157.982	89.6875
AT1G07160	573.346	0.578795	0.608218	0.951625	0.341287	0.792686	174.952	803.193	401.204	1306.39	296.731	457.61
AT1G07170	639.807	0.574827	0.347285	1.6552	0.0978836	0.515418	635.225	431.17	475.142	1046.6	644.291	606.41
AT1G07175	0.606049	-2.38266	3.96135	-0.601476	0.547523	NA	0	0	3.63629	0	0	0
AT1G07180	2138.2	0.00993355	0.243619	0.0407749	0.967475	0.995901	2389.65	1856.69	2145.41	2529.16	1985.08	1923.18
AT1G07190	2.35989	-2.51099	3.90407	-0.643172	0.520112	NA	0	0	12.121	0	0	2.03835
AT1G07200	167.219	0.818733	0.508586	1.60982	0.107436	0.536411	112.82	95.1488	154.542	214.994	295.357	130.455
AT1G07210	179.027	-0.361086	0.511882	-0.705409	0.480556	0.865803	178.223	248.587	177.572	80.6227	204.689	184.471
AT1G07220	251.36	0.165809	0.498956	0.332311	0.739654	0.950706	322.926	159.439	228.48	152.287	398.389	246.641
AT1G07230	241.482	-0.499386	0.630392	-0.792184	0.428253	0.840489	215.012	341.164	292.722	44.7904	322.832	232.372
AT1G07240	608.859	0.654291	0.321775	2.03338	0.0420144	0.353636	377.701	583.751	457.567	874.906	752.817	606.41
AT1G07250	490.481	0.14351	0.373017	0.384727	0.70044	0.940701	599.253	350.593	447.87	582.275	607.199	355.692
AT1G07260	30.7948	-0.378115	1.20592	-0.313548	0.753864	0.953699	62.9502	9.42916	32.1206	2.98603	46.7077	30.5753
AT1G07270	6.55622	-0.126112	2.4672	-0.0511154	0.959234	0.994716	16.3507	0	4.24234	0	5.49502	13.2493
AT1G07280	1005.4	-0.213809	0.333778	-0.640572	0.521801	0.881864	1331.76	1068.92	838.165	931.64	1215.77	646.158
AT1G07290	22.1626	1.92704	1.10313	1.74688	0.0806574	0.474798	6.54028	12.0008	9.09073	52.2555	39.8389	13.2493
AT1G07300	251.205	0.342873	0.446422	0.768047	0.442459	0.846522	197.843	264.874	202.42	168.711	287.115	386.268
AT1G07310	1440.44	0.393789	0.271948	1.44803	0.147609	0.607583	1012.11	1253.22	1469.67	1352.67	1891.66	1663.3
AT1G07320	3252.26	0.398924	0.266509	1.49685	0.134432	0.587032	2995.45	2781.6	2638.74	4922.46	2965.94	3209.38
AT1G07330	5.11842	-1.45116	3.15623	-0.459779	0.645675	NA	21.2559	0	1.2121	0	8.24253	0
AT1G07340	2.61246	0.144953	3.26071	0.0444543	0.964542	NA	4.90521	2.57159	0	0	4.12126	4.0767
AT1G07350	783.708	-0.693585	0.521187	-1.33078	0.183262	0.654947	954.881	930.916	1021.19	240.375	342.065	1212.82
AT1G07360	945.546	-0.330675	0.420839	-0.785752	0.432013	0.842233	1133.92	952.346	1075.13	359.816	870.96	1281.1
AT1G07370	60.3302	1.21253	0.706454	1.71636	0.0860966	0.488637	31.0663	39.431	38.7871	50.7625	75.5565	126.378
AT1G07380	45.9851	-1.16861	0.87432	-1.3366	0.181355	0.652981	103.827	64.2898	23.0299	29.8603	19.2326	35.6712
AT1G07390	28.9896	-0.577374	1.35732	-0.425379	0.670561	0.93062	58.045	25.7159	20.6057	0	24.7276	44.8437
AT1G07400	45.1338	0.413922	1.09398	0.378363	0.705161	0.942685	45.7819	24.0015	46.0597	131.385	12.3638	11.2109
AT1G07410	10.4186	-1.32767	2.11241	-0.62851	0.52967	0.883897	23.7085	9.42916	11.5149	0	17.8588	0
AT1G07420	485.618	-0.663448	0.425673	-1.55859	0.119094	0.559327	372.796	852.911	559.989	343.393	520.653	263.967
AT1G07430	496.447	2.13662	0.428446	4.98692	6.14e-07	0.000229674	210.106	114.007	227.268	633.038	1210.28	583.988
AT1G07440	803.752	0.191248	0.315746	0.605704	0.544711	0.889481	885.39	635.183	730.289	1061.53	883.324	626.793
AT1G07450	141.432	-0.443002	0.519768	-0.852307	0.394044	0.822444	120.178	198.012	170.3	168.711	105.779	85.6108
AT1G07460	0.408767	-1.78794	3.98886	-0.448234	0.653984	NA	2.4526	0	0	0	0	0
AT1G07470	640.307	0.347309	0.372381	0.932671	0.35099	0.796169	383.424	641.183	666.654	488.215	730.837	931.527
AT1G07473	69.5965	0.180049	0.66604	0.270327	0.786908	0.962038	47.417	50.5746	97.5738	62.7066	92.0415	67.2656
AT1G07476	14.1381	2.50287	1.28552	1.94698	0.0515374	0.389321	6.54028	2.57159	3.63629	16.4231	26.1013	29.5561
AT1G07480	1046.63	0.112837	0.332712	0.339142	0.734503	0.950035	1041.54	1056.92	919.982	828.622	840.738	1591.95
AT1G07485	14.2037	1.22697	1.24607	0.984669	0.324787	0.784612	10.628	9.42916	5.45444	26.8742	20.6063	12.2301
AT1G07490	0	NA	NA	NA	NA	NA	0	0	0	0	0	0
AT1G07500	296.095	0.802137	0.499253	1.60667	0.108126	0.537647	220.734	136.294	290.297	194.092	554.997	380.153
AT1G07510	331.99	0.277631	0.379131	0.732281	0.463997	0.858364	231.362	307.734	361.205	283.673	449.218	358.75
AT1G07520	128.806	-0.950251	0.662942	-1.43338	0.151748	0.61368	156.149	181.726	172.118	26.8742	81.0515	154.915
AT1G07530	193.312	-0.105391	0.516144	-0.204189	0.838206	0.972565	147.156	166.296	287.873	108.99	197.821	251.736
AT1G07540	8.76433	0.361523	3.15762	0.114492	0.908847	0.987746	0	0	23.0299	0	0	29.5561
AT1G07550	0	NA	NA	NA	NA	NA	0	0	0	0	0	0
AT1G07560	2.00657	0.561057	3.81733	0.146976	0.883151	NA	4.90521	0	0	0	0	7.13423
AT1G07570	182.715	-0.572136	0.522126	-1.09578	0.273174	0.745027	220.734	256.302	178.178	229.924	79.6778	131.474
AT1G07580	0	NA	NA	NA	NA	NA	0	0	0	0	0	0
AT1G07590	1184.87	1.62339	0.465237	3.48938	0.000484145	0.0296379	771.753	470.601	499.384	2245.49	2508.48	613.544
AT1G07600	0	NA	NA	NA	NA	NA	0	0	0	0	0	0
AT1G07610	161.223	1.57476	0.649334	2.4252	0.0153002	0.220786	105.462	76.2905	61.2109	419.537	229.417	75.419
AT1G07615	101.198	0.246557	0.659718	0.37373	0.708605	0.944008	100.557	63.4326	113.331	107.497	174.467	47.9013
AT1G07620	31.6497	-0.0263042	1.35279	-0.0194444	0.984487	0.997956	30.2488	30.8591	34.5448	44.7904	49.4552	0
AT1G07630	419.756	0.0329412	0.424336	0.0776301	0.938122	0.990502	423.483	489.459	332.721	220.966	513.784	538.125
AT1G07640	10.2355	0.280332	2.58929	0.108266	0.913785	0.988166	8.99288	0	18.7875	0	0	33.6328
AT1G07645	0	NA	NA	NA	NA	NA	0	0	0	0	0	0
AT1G07650	622.298	0.454915	0.409981	1.1096	0.267171	0.738927	269.786	651.469	653.927	613.628	619.563	925.412
AT1G07660	543.275	-0.206385	0.359439	-0.574187	0.565841	0.899069	455.367	603.466	687.865	488.215	357.176	667.56
AT1G07670	236.265	-0.485215	0.426463	-1.13777	0.255217	0.730422	195.391	307.734	323.63	159.752	248.65	182.432
AT1G07680	0	NA	NA	NA	NA	NA	0	0	0	0	0	0
AT1G07690	0	NA	NA	NA	NA	NA	0	0	0	0	0	0
AT1G07700	1921.04	-0.0282487	0.28636	-0.0986476	0.921418	0.989318	1731.54	1914.12	2174.5	1925.99	1350.4	2429.72
AT1G07702	0	NA	NA	NA	NA	NA	0	0	0	0	0	0
AT1G07705	213.654	0.212876	0.464382	0.458408	0.646659	0.92348	246.895	198.012	149.088	285.166	142.87	259.89
AT1G07710	26.384	-1.04514	1.4091	-0.741711	0.458262	0.855157	17.1682	39.431	50.302	0	9.61628	41.7862
AT1G07720	470.005	-0.272346	0.371335	-0.733423	0.4633	0.857815	334.372	497.174	710.895	422.523	406.631	448.437
AT1G07725	0.800424	-1.30739	3.96578	-0.329669	0.74165	NA	0	3.42879	0	0	1.37375	0
AT1G07728	0.514691	-0.296888	4.02463	-0.0737678	0.941195	NA	0	1.71439	0	0	1.37375	0
AT1G07730	0.248836	1.72814	4.08047	0.423516	0.671919	NA	0	0	0	1.49301	0	0
AT1G07740	17.7769	3.11088	1.89309	1.64328	0.100325	0.520944	0	0	10.9089	5.97205	71.4352	18.3452
AT1G07745	325.658	-0.701198	0.446005	-1.57218	0.11591	0.553042	368.708	524.604	316.963	140.343	343.439	259.89
AT1G07747	0.505041	-2.12277	3.97202	-0.53443	0.593044	NA	0	0	3.03024	0	0	0
AT1G07750	405.578	0.28795	0.344059	0.836919	0.402638	0.829698	441.469	327.449	326.66	415.058	546.754	376.076
AT1G07760	0	NA	NA	NA	NA	NA	0	0	0	0	0	0
AT1G07770	655.492	0.28573	0.311051	0.918594	0.358308	0.800458	621.326	612.896	537.565	912.231	700.615	548.317
AT1G07780	30.706	1.05984	0.916679	1.15617	0.24761	0.723647	20.4384	20.5727	18.7875	47.7764	20.6063	56.0547
AT1G07790	141.145	-1.1317	0.638574	-1.77224	0.0763553	0.462543	277.962	138.866	165.451	58.2275	45.3339	161.03
AT1G07795	0.142866	-0.19541	4.08047	-0.047889	0.961805	NA	0	0.857197	0	0	0	0
AT1G07800.1	0	NA	NA	NA	NA	NA	0	0	0	0	0	0
AT1G07810	328.903	-0.0748499	0.350768	-0.213389	0.831024	0.971272	391.599	341.164	279.995	325.477	273.377	361.807
AT1G07820	638.177	-0.0877996	0.350241	-0.250684	0.802059	0.965005	477.44	632.611	863.013	525.541	542.633	787.823
AT1G07830	257.263	0.525621	0.491498	1.06943	0.284878	0.756371	153.697	259.731	218.784	473.285	267.882	170.202
AT1G07840	397.831	0.209743	0.375615	0.558399	0.576572	0.90372	467.63	305.162	333.933	368.774	565.987	345.501
AT1G07850	8.27822	-1.44434	2.38336	-0.606011	0.544507	0.889476	0	16.2867	19.9996	0	12.3638	1.01918
AT1G07860	0.625458	0.338232	4.00582	0.0844352	0.93271	NA	0	1.71439	0	0	0	2.03835
AT1G07870	909.831	0.545087	0.410766	1.327	0.184509	0.656335	495.426	953.203	772.106	646.475	912.173	1679.6
AT1G07880	10.3968	-2.29168	1.86129	-1.23123	0.218236	0.694113	4.90521	17.1439	29.6964	0	9.61628	1.01918
AT1G07885	0	NA	NA	NA	NA	NA	0	0	0	0	0	0
AT1G07890	10530.8	0.103429	0.24922	0.415011	0.678134	0.933147	9191.54	9788.33	11481	11231.9	8223.29	13268.7
AT1G07900	363.402	-0.0632936	0.606384	-0.104379	0.916869	0.988704	202.749	398.596	513.323	100.032	333.822	631.889
AT1G07901	38.6712	-0.594725	0.913681	-0.650911	0.515104	0.879645	53.1398	22.2871	64.2412	13.4371	41.2126	37.7095
AT1G07910	98.2063	-0.76374	0.603592	-1.26532	0.205755	0.681429	152.879	114.864	103.634	41.8044	70.0615	105.994
AT1G07920	3040.95	-0.66675	0.279609	-2.38458	0.0170987	0.231331	4948.54	3007.9	3238.72	1967.79	2369.73	2713.05
AT1G07930	1579.62	-0.41528	0.321643	-1.29112	0.196661	0.669791	2294.82	1526.67	1595.73	1349.68	927.284	1783.56
AT1G07940	1610.2	-0.515414	0.264415	-1.94926	0.0512647	0.388862	2145.21	1705.82	1834.51	1213.82	1116.86	1644.95
AT1G07950	104.25	0.228354	0.679628	0.335998	0.736872	0.950035	123.448	93.4344	70.9077	131.385	167.598	38.7287
AT1G07960	558.401	0.708871	0.37608	1.88489	0.0594443	0.41701	433.293	414.883	423.022	1049.59	494.552	535.067
AT1G07970	131.577	-0.392654	0.66064	-0.594354	0.552275	0.892656	245.26	118.293	84.2408	192.599	87.9203	61.1506
AT1G07980	231.846	0.30207	0.556021	0.543271	0.586943	0.907764	212.559	162.01	247.874	241.868	425.864	100.898
AT1G07985	45.0164	1.69647	0.815212	2.08102	0.0374322	0.336634	31.8839	11.1436	20.6057	91.0738	52.2027	63.1889
AT1G07990	376.377	0.0260012	0.431098	0.0603139	0.951906	0.993139	547.748	286.304	284.843	318.012	524.774	296.58
AT1G08000	126.139	0.0331778	0.549279	0.0604024	0.951835	0.993139	164.324	138.866	70.9077	140.343	141.497	100.898
AT1G08005	0.679451	3.32318	3.98883	0.833122	0.404776	NA	0	0	0	0	0	4.0767
AT1G08010	380.006	-0.841315	0.662561	-1.26979	0.204159	0.679291	495.426	649.755	318.782	38.8183	373.661	403.594
AT1G08030	249.846	-0.00868388	0.461988	-0.0187968	0.985003	0.997956	292.677	258.016	201.814	229.924	149.739	366.903
AT1G08032	0	NA	NA	NA	NA	NA	0	0	0	0	0	0
AT1G08035	25.9791	1.91141	1.63199	1.17122	0.241512	0.716155	21.2559	1.71439	9.69678	119.441	2.74751	1.01918
AT1G08040	360.735	0.126513	0.371987	0.3401	0.733781	0.950035	324.561	383.167	327.872	279.193	342.065	507.55
AT1G08050	15.6257	0.615092	1.59359	0.385977	0.699513	0.940701	14.7156	14.5723	7.87863	0	17.8588	38.7287
AT1G08060	88.1855	1.11072	0.755844	1.46951	0.141696	0.597572	71.9431	69.4329	26.0601	200.064	116.769	44.8437
AT1G08065	0	NA	NA	NA	NA	NA	0	0	0	0	0	0
AT1G08070	26.2853	0.834394	1.48091	0.563432	0.573141	0.902043	25.3436	26.5731	4.84839	0	67.314	33.6328
AT1G08080	0.136256	-0.19541	4.08047	-0.047889	0.961805	NA	0.817535	0	0	0	0	0
AT1G08090	0	NA	NA	NA	NA	NA	0	0	0	0	0	0
AT1G08100	0	NA	NA	NA	NA	NA	0	0	0	0	0	0
AT1G08105.1	0	NA	NA	NA	NA	NA	0	0	0	0	0	0
AT1G08110	1695.47	0.333436	0.237319	1.40501	0.160017	0.624636	1477.29	1488.95	1535.73	1737.87	1693.84	2239.13
AT1G08115	9.97156	1.38012	1.56972	0.87921	0.379288	0.81337	4.08767	3.42879	9.09073	2.98603	13.7375	26.4986
AT1G08120	3.22739	5.55079	3.92445	1.41441	0.157241	NA	0	0	0	0	0	19.3643
AT1G08125	288.601	0.523846	0.359214	1.45831	0.144755	0.60229	216.647	248.587	245.45	282.18	331.075	407.67
AT1G08130	157.551	-0.279186	0.621314	-0.449347	0.653181	0.924652	207.654	126.008	184.239	97.0459	265.135	65.2273
AT1G08135	0.681279	-2.52854	3.95614	-0.639145	0.522729	NA	4.08767	0	0	0	0	0
AT1G08140	0	NA	NA	NA	NA	NA	0	0	0	0	0	0
AT1G08150	0.817535	-2.79252	3.94793	-0.707337	0.479357	NA	4.90521	0	0	0	0	0
AT1G08160	0	NA	NA	NA	NA	NA	0	0	0	0	0	0
AT1G08165	1.01008	-3.11306	3.93977	-0.790162	0.429433	NA	0	0	6.06049	0	0	0
AT1G08170	2.18009	-4.21055	3.92223	-1.07351	0.283043	NA	13.0806	0	0	0	0	0
AT1G08180	56.7365	-0.674502	0.722174	-0.933988	0.35031	0.795369	62.9502	62.5754	83.6347	62.7066	24.7276	43.8246
AT1G08190	965.601	0.661	0.420609	1.57153	0.116059	0.553349	793.009	607.752	843.014	2039.46	718.474	791.9
AT1G08200	3405.72	-0.0418159	0.27008	-0.154828	0.876957	0.980002	3183.48	3153.63	4029.01	2596.35	3136.28	4335.57
AT1G08210	122.692	-0.50162	0.528505	-0.94913	0.342555	0.793318	158.602	90.8628	181.815	111.976	87.9203	104.975
AT1G08220	86.4629	0.245342	1.18539	0.206972	0.836032	0.97228	66.2203	133.723	37.575	0	185.457	95.8025
AT1G08230	632.413	-0.510469	0.387571	-1.3171	0.187806	0.660289	698.992	660.899	870.286	503.145	300.852	760.305
AT1G08240	0.509588	2.91579	4.01518	0.72619	0.467722	NA	0	0	0	0	0	3.05753
AT1G08250	308.75	-0.981883	0.642515	-1.52819	0.126466	0.57206	443.104	371.166	416.355	35.8323	221.174	364.865
AT1G08260	41.828	0.622973	0.893862	0.696945	0.485837	0.867973	33.5189	36.0023	29.0903	86.5948	49.4552	16.3068
AT1G08270	18.8323	0.700716	1.15544	0.60645	0.544216	0.889449	21.2559	12.858	9.09073	14.9301	15.1113	39.7479
AT1G08280	45.2144	0.422404	0.804863	0.524815	0.599712	0.911315	42.5118	50.5746	23.0299	59.7205	30.2226	65.2273
AT1G08290	2.48621	-3.33634	3.92132	-0.850819	0.39487	NA	13.8981	0	0	0	0	1.01918
AT1G08300	26.2093	0.597323	1.01082	0.590928	0.554569	0.894311	18.8033	10.2864	33.3327	43.2974	21.9801	29.5561
AT1G08310	30.7391	-0.101694	1.35309	-0.0751563	0.94009	0.990933	26.9786	52.289	16.3633	0	43.9601	44.8437
AT1G08315	225.944	-0.701407	0.587689	-1.1935	0.232674	0.707728	337.642	234.872	267.874	67.1856	125.012	323.079
AT1G08320	10.2764	0.266079	2.65433	0.100243	0.920151	0.989099	0	2.57159	25.454	0	0	33.6328
AT1G08340	8.29353	-2.98826	2.85619	-1.04624	0.29545	0.764527	44.1469	0	0	1.49301	4.12126	0
AT1G08350	114.994	0.384424	0.693193	0.55457	0.579189	0.904648	45.7819	106.292	147.27	140.343	53.5764	196.701
AT1G08360	1995.42	-0.179147	0.248387	-0.721242	0.470761	0.861412	2372.49	2043.56	1942.39	1849.84	1549.6	2214.67
AT1G08370	546.977	-0.310855	0.334087	-0.930461	0.352132	0.796457	767.665	528.89	521.202	383.704	509.663	570.739
AT1G08380	82872.5	0.319726	0.229688	1.392	0.163922	0.629537	77974	66155	77050.6	113830	84859.6	77365.6
AT1G08390	319.7	0.0698214	0.378882	0.184283	0.853792	0.974695	354.81	272.589	307.873	406.1	343.439	233.391
AT1G08400	74.3431	-0.350258	0.845713	-0.414157	0.678759	0.933365	109.55	74.5761	65.4533	126.906	56.3239	13.2493
AT1G08410	144.283	0.607864	0.499093	1.21794	0.223248	0.698584	137.346	96.8632	108.483	240.375	155.234	127.397
AT1G08420	93.1025	0.290566	0.638029	0.455412	0.648813	0.92348	120.178	74.5761	56.3625	125.413	125.012	57.0739
AT1G08430	0.953791	-3.01558	3.94207	-0.764976	0.444286	NA	5.72274	0	0	0	0	0
AT1G08440	0	NA	NA	NA	NA	NA	0	0	0	0	0	0
AT1G08450	1306.53	0.884315	0.329317	2.6853	0.00724651	0.14564	677.736	993.491	1083.01	2146.95	1136.09	1801.9
AT1G08460	252.265	-0.559485	0.413161	-1.35416	0.175686	0.646551	290.225	280.303	331.509	132.878	251.397	227.276
AT1G08465	199.05	-0.463188	0.461604	-1.00343	0.315652	0.779896	165.96	228.872	297.57	164.231	123.638	214.027
AT1G08470	137.941	-0.513758	0.807204	-0.636466	0.524473	0.882697	153.697	138.866	194.542	10.4511	145.618	184.471
AT1G08480	879.229	-0.0268301	0.28188	-0.0951827	0.92417	0.989631	1022.74	810.908	829.075	912.231	700.615	999.812
AT1G08490	1605.44	-0.146533	0.300084	-0.488308	0.625332	0.919679	2052.01	1462.38	1545.42	2026.02	1369.63	1177.15
AT1G08500	81.4774	0.544812	1.25823	0.432998	0.665017	0.928684	17.9858	62.5754	118.179	0	219.801	70.3231
AT1G08510	1094.64	0.216764	0.321107	0.67505	0.499644	0.873208	802.819	1160.64	1073.31	1576.62	1100.38	854.069
AT1G08520	1812.66	0.0862573	0.235004	0.367047	0.713584	0.945313	1815.74	1686.11	1772.69	2109.63	1927.38	1564.44
AT1G08530	276.633	0.286827	0.389691	0.736037	0.461708	0.856372	226.457	266.588	255.147	271.728	236.286	403.594
AT1G08540	877.13	-0.158777	0.246146	-0.64505	0.518895	0.880565	976.954	844.339	954.527	848.032	825.626	813.302
AT1G08550	753.796	-0.518343	0.282384	-1.8356	0.0664175	0.435924	1079.15	828.052	756.349	647.968	578.351	632.908
AT1G08560	34.9569	-0.47879	1.4143	-0.338535	0.73496	0.950035	49.8696	16.2867	55.7565	77.6367	0	10.1918
AT1G08570	1643.26	-0.388158	0.263251	-1.47448	0.140352	0.595648	1886.87	2004.98	1696.94	1248.16	1799.62	1223.01
AT1G08580	480.442	1.14898	0.518742	2.21494	0.0267642	0.287062	224.005	342.879	328.478	1028.69	744.575	214.027
AT1G08590	0.918724	-1.59545	3.95517	-0.403383	0.686667	NA	0	1.71439	2.42419	0	1.37375	0
AT1G08592	0	NA	NA	NA	NA	NA	0	0	0	0	0	0
AT1G08600	150.911	0.456341	0.49995	0.912773	0.361362	0.801839	117.725	102.864	160.603	198.571	211.558	114.148
AT1G08610	126.806	-0.615505	0.601758	-1.02284	0.306381	0.774114	165.96	169.725	124.846	44.7904	160.729	94.7834
AT1G08620	263.923	-0.0881123	0.551949	-0.159639	0.873166	0.979459	363.803	276.017	175.754	280.687	387.399	99.8792
AT1G08630	384.714	-0.174744	0.641444	-0.272423	0.785297	0.961712	407.95	526.319	289.085	742.028	262.387	80.5149
AT1G08640	1071.87	-0.0915618	0.30153	-0.303657	0.761389	0.954708	1156.81	1122.07	1039.98	752.479	984.982	1374.87
AT1G08650	910.06	1.14092	0.358459	3.18286	0.0014583	0.0575836	524.04	645.469	533.929	988.375	1897.15	871.395
AT1G08660	1046.75	0.185722	0.306853	0.605248	0.545014	0.889658	958.151	826.338	1154.52	868.934	1011.08	1461.5
AT1G08670	1.69863	4.62999	3.94018	1.17507	0.239966	NA	0	0	0	0	0	10.1918
AT1G08680	258.352	0.0209735	0.393591	0.0532877	0.957503	0.994652	205.201	328.306	235.753	295.617	261.013	224.219
AT1G08695	0	NA	NA	NA	NA	NA	0	0	0	0	0	0
AT1G08700	209.457	-0.156792	0.459208	-0.341441	0.732772	0.949978	230.545	210.013	221.814	271.728	116.769	205.874
AT1G08710	293.748	0.52462	0.488828	1.07322	0.283172	0.754355	237.085	246.873	238.783	177.669	583.846	278.235
AT1G08720	270.492	1.01089	0.43523	2.32267	0.020197	0.252235	118.543	248.587	171.512	285.166	355.802	443.342
AT1G08730	4.41307	-5.22848	3.5939	-1.45482	0.145719	NA	19.6208	6.85757	0	0	0	0
AT1G08735.1	0	NA	NA	NA	NA	NA	0	0	0	0	0	0
AT1G08740.1	0	NA	NA	NA	NA	NA	0	0	0	0	0	0
AT1G08750	191.699	-0.240764	0.49335	-0.488018	0.625537	0.919679	248.531	158.581	216.359	100.032	188.204	238.487
AT1G08760	118.185	-0.680338	0.61855	-1.09989	0.271379	0.743552	146.339	162.01	128.482	37.3253	144.244	90.7067
AT1G08770	546.74	-0.0413337	0.375833	-0.109979	0.912426	0.988166	559.194	473.173	630.291	762.93	512.41	342.443
AT1G08780	190.637	0.420423	0.518841	0.810311	0.417761	0.836301	148.791	174.868	165.451	123.92	358.55	172.241
AT1G08790	0.915836	3.72165	3.96921	0.937632	0.348434	NA	0	0	0	0	5.49502	0
AT1G08800	78.8628	-0.0183276	0.810103	-0.0226238	0.98195	0.997794	101.374	57.4322	79.3924	16.4231	136.002	82.5532
AT1G08810	129.441	0.700547	0.516196	1.35713	0.174739	0.645229	71.1255	89.1485	135.149	186.627	162.103	132.493
AT1G08820	513.898	0.310334	0.407939	0.760737	0.446814	0.849509	326.196	576.893	473.93	325.477	682.756	698.135
AT1G08830	1918.06	0.685251	0.271368	2.52517	0.0115642	0.190458	1315.41	1572.1	1526.03	1782.66	2342.25	2969.88
AT1G08840	227.036	-0.527464	0.636265	-0.829001	0.407104	0.832114	356.445	265.731	183.027	62.7066	126.385	367.923
AT1G08845	187.587	0.390902	0.487648	0.801607	0.42278	0.83794	216.647	131.151	139.391	135.864	284.367	218.104
AT1G08860	0	NA	NA	NA	NA	NA	0	0	0	0	0	0
AT1G08870	0	NA	NA	NA	NA	NA	0	0	0	0	0	0
AT1G08880	472.205	-0.236543	0.311502	-0.759363	0.447636	0.849509	517.5	446.599	568.474	453.876	362.671	484.109
AT1G08890	552.884	-0.0735428	0.500469	-0.146948	0.883173	0.981287	304.94	668.613	727.865	222.459	616.816	776.612
AT1G08900	1391.98	0.148567	0.31242	0.475536	0.634405	0.921113	1088.14	1256.65	1616.94	1239.2	1163.57	1987.39
AT1G08910	711.87	0.676529	0.302571	2.23593	0.0253562	0.280906	480.71	556.321	607.261	694.251	846.233	1086.44
AT1G08920	1085.99	1.29212	0.562006	2.29911	0.0214984	0.260754	291.86	967.775	629.685	564.359	3000.28	1061.98
AT1G08930	5919.89	0.561263	0.359141	1.56279	0.118101	0.557134	3199.83	5771.51	5375.65	9852.39	7411.41	3908.54
AT1G08940	469.269	1.22284	0.443521	2.75712	0.00583132	0.129539	147.974	330.021	366.053	913.724	465.703	592.141
AT1G08950	0	NA	NA	NA	NA	NA	0	0	0	0	0	0
AT1G08960	93.4575	-0.65673	0.606917	-1.08207	0.279219	0.750976	103.827	119.15	120.604	59.7205	45.3339	112.109
AT1G08970	389.955	-0.0152128	0.370482	-0.0410622	0.967246	0.995901	289.407	428.598	458.173	289.645	451.965	421.939
AT1G08980	1209.6	-0.400166	0.238511	-1.67776	0.0933931	0.505929	1257.37	1499.24	1372.09	1131.7	969.871	1027.33
AT1G08985	9.79502	0.145341	1.91662	0.0758317	0.939553	0.990829	6.54028	12.858	8.48468	0	28.8488	2.03835
AT1G08990	0	NA	NA	NA	NA	NA	0	0	0	0	0	0
AT1G09000	32.417	1.55624	1.08275	1.4373	0.150633	0.612443	10.628	22.2871	16.3633	47.7764	89.294	8.15341
AT1G09010	547.706	-0.651932	0.490458	-1.32923	0.183772	0.654947	864.952	697.758	446.658	176.176	406.631	694.059
AT1G09020	404.28	-0.0934477	0.367804	-0.254069	0.799442	0.964596	361.35	402.882	488.475	319.505	321.459	532.01
AT1G09026	0	NA	NA	NA	NA	NA	0	0	0	0	0	0
AT1G09030	0	NA	NA	NA	NA	NA	0	0	0	0	0	0
AT1G09040	24.281	-0.433576	1.44345	-0.300375	0.763891	0.955198	44.9644	10.2864	28.4843	0	42.5864	19.3643
AT1G09050	18.3163	0.202533	1.34365	0.150734	0.880186	0.980207	19.6208	17.1439	14.5452	8.95808	2.74751	46.8821
AT1G09060	203.44	0.0640384	0.501482	0.127698	0.898388	0.985346	203.566	229.729	164.239	162.738	129.133	331.232
AT1G09070	14558.6	-0.260303	0.249644	-1.0427	0.297088	0.766115	13081.4	18080	16445.1	10887.1	12366.5	16491.3
AT1G09080	141.354	0.799503	0.697414	1.14638	0.251636	0.72752	82.571	140.58	86.665	189.613	43.9601	304.734
AT1G09090	1.91696	-2.86132	3.92698	-0.728632	0.466227	NA	5.72274	4.28598	0	1.49301	0	0
AT1G09100	119.185	-0.511333	0.641987	-0.796485	0.42575	0.839299	134.076	95.1488	191.511	67.1856	54.9502	172.241
AT1G09110	0	NA	NA	NA	NA	NA	0	0	0	0	0	0
AT1G09130	1757.9	-0.20295	0.248858	-0.815527	0.414771	0.834818	2155.84	1603.82	1884.21	1830.43	1406.72	1666.35
AT1G09140	3114.75	-0.334114	0.331064	-1.00921	0.312872	0.778179	3769.65	3374.78	3278.72	1846.86	2174.65	4243.85
AT1G09150	467.016	-0.0752808	0.414213	-0.181744	0.855783	0.97514	345	554.606	538.777	283.673	413.5	666.541
AT1G09155	0	NA	NA	NA	NA	NA	0	0	0	0	0	0
AT1G09157	37.747	0.262554	0.904218	0.290366	0.771536	0.95819	33.5189	46.2886	23.0299	71.6646	31.5964	20.3835
AT1G09160	925.389	0.115876	0.394496	0.293732	0.768963	0.957926	704.715	809.194	1151.49	540.471	909.425	1437.04
AT1G09170	14.4652	0.292782	2.01385	0.145384	0.884408	0.981704	0	11.1436	27.8782	0	19.2326	28.5369
AT1G09176	8.69137	2.39875	2.2653	1.05891	0.289641	0.760674	0	3.42879	4.84839	0	35.7176	8.15341
AT1G09180	119.602	1.22108	0.993081	1.22959	0.218851	0.694598	25.3436	78.0049	112.119	5.97205	204.689	291.484
AT1G09190	38.991	1.49557	1.18053	1.26686	0.205205	0.680069	0.817535	25.7159	34.5448	77.6367	72.809	22.4219
AT1G09195	65.5068	-0.563461	0.688598	-0.818273	0.413201	0.834344	96.4691	93.4344	44.8476	43.2974	46.7077	68.2848
AT1G09200	271.946	0.262834	0.451099	0.582652	0.560128	0.897154	190.486	184.297	366.659	331.449	214.306	344.481
AT1G09210	683.936	-0.624585	0.322862	-1.93453	0.0530486	0.39446	981.859	746.618	761.803	447.904	456.086	709.346
AT1G09220	20.0797	-0.83892	1.42301	-0.589538	0.555501	0.894378	18.8033	0.857197	57.5746	10.4511	16.4851	16.3068
AT1G09230	611.745	-0.00755306	0.329043	-0.0229546	0.981686	0.997794	568.187	738.046	533.323	783.832	570.108	476.974
AT1G09240	25.0225	-2.66023	1.64677	-1.61542	0.10622	0.533209	25.3436	66.0041	38.1811	0	20.6063	0
AT1G09245	0	NA	NA	NA	NA	NA	0	0	0	0	0	0
AT1G09250	997.489	0.486869	0.331773	1.46748	0.142247	0.598578	817.535	864.911	809.681	1581.1	729.464	1182.24
AT1G09260	0	NA	NA	NA	NA	NA	0	0	0	0	0	0
AT1G09270	720.218	-0.189348	0.331333	-0.571472	0.567679	0.900574	645.035	749.19	908.467	671.856	479.44	867.319
AT1G09280	153.967	-0.953525	0.59011	-1.61584	0.106128	0.533209	176.588	235.729	197.572	38.8183	118.143	156.953
AT1G09290	144.032	-1.10136	0.722819	-1.52369	0.127585	0.573868	246.078	150.867	192.117	59.7205	190.952	24.4602
AT1G09300	210.618	-0.517017	0.527614	-0.979915	0.327128	0.785357	214.194	373.738	156.361	100.032	234.912	184.471
AT1G09310	22286.6	-0.638772	0.416443	-1.53388	0.12506	0.569089	24649.5	25229.9	31546	13982.1	7360.58	30951.4
AT1G09320	87.4347	-0.280848	0.804778	-0.348976	0.727108	0.948842	143.069	74.5761	70.3017	16.4231	134.628	85.6108
AT1G09330	722.78	0.0281374	0.281445	0.0999747	0.920364	0.98911	640.947	795.479	710.289	752.479	827	610.486
AT1G09340	19411.1	0.353004	0.221453	1.59403	0.110929	0.544629	19019.9	15050.7	17073	25767.9	19897.5	19657.9
AT1G09350	66.9104	1.99424	0.661165	3.01625	0.00255924	0.0818073	18.8033	30.8591	30.9085	85.1018	96.1628	139.627
AT1G09360	0	NA	NA	NA	NA	NA	0	0	0	0	0	0
AT1G09370	0	NA	NA	NA	NA	NA	0	0	0	0	0	0
AT1G09380	0	NA	NA	NA	NA	NA	0	0	0	0	0	0
AT1G09390	449.95	-0.520104	0.30253	-1.71918	0.0855815	0.486997	550.201	534.891	506.051	318.012	377.782	412.766
AT1G09400	33.6392	0.0477503	1.06755	0.0447287	0.964324	0.995523	40.8767	36.0023	22.4238	5.97205	70.0615	26.4986
AT1G09410	6.32874	-2.84856	2.12607	-1.33982	0.180303	0.652455	8.17535	3.42879	21.8178	1.49301	0	3.05753
AT1G09415	413.08	0.0960136	0.439273	0.218574	0.826982	0.970898	521.587	217.728	458.173	415.058	563.239	302.695
AT1G09420	81.1146	-0.490177	0.767258	-0.638868	0.522908	0.882336	140.616	43.717	99.998	26.8742	111.274	64.2081
AT1G09421	0	NA	NA	NA	NA	NA	0	0	0	0	0	0
AT1G09430	1327.67	-0.552764	0.242398	-2.2804	0.0225838	0.267746	1717.64	1602.96	1416.34	1189.93	954.759	1084.4
AT1G09440	86.5218	-0.472252	0.725327	-0.651088	0.51499	0.879645	122.63	83.1481	95.7557	123.92	23.3538	70.3231
AT1G09450	2.80428	3.15975	3.87152	0.816152	0.414413	NA	0	1.71439	0	0	15.1113	0
AT1G09460	26.9249	-0.134566	1.93966	-0.069376	0.94469	0.991338	4.08767	80.5765	0	23.8882	0	52.9971
AT1G09470	1.65949	2.2835	3.89073	0.586909	0.557265	NA	0	1.71439	0	0	8.24253	0
AT1G09480	9.0813	-2.68482	2.20373	-1.2183	0.223108	0.698496	17.1682	27.4303	2.42419	7.46507	0	0
AT1G09483	0.545023	-2.20523	3.96843	-0.555694	0.57842	NA	3.27014	0	0	0	0	0
AT1G09486	32.7963	-1.75583	1.25255	-1.40181	0.160973	0.62575	31.8839	46.2886	73.9379	0	15.1113	29.5561
AT1G09490	1000.54	-0.130191	0.274819	-0.473732	0.635691	0.921174	1063.61	1032.06	1040.59	949.556	1166.32	751.133
AT1G09500	294.975	-1.18617	0.612436	-1.93681	0.0527686	0.393279	593.53	238.301	396.962	210.515	281.62	48.9204
AT1G09510	8.19298	-0.734833	2.35091	-0.312574	0.754605	0.953844	1.63507	8.57197	20.6057	0	0	18.3452
AT1G09520	326.375	-0.656034	0.346797	-1.89169	0.0585321	0.412842	400.592	325.735	471.506	237.389	269.256	253.775
AT1G09530	390.886	-0.509934	0.48248	-1.0569	0.290556	0.761161	475.805	478.316	424.84	167.217	229.417	569.719
AT1G09540	0	NA	NA	NA	NA	NA	0	0	0	0	0	0
AT1G09550	0	NA	NA	NA	NA	NA	0	0	0	0	0	0
AT1G09560	1011.15	-0.708485	0.322073	-2.19976	0.0278236	0.291222	1540.24	1212.08	1012.71	559.88	743.201	998.792
AT1G09570	628.255	-0.296535	0.308743	-0.960459	0.336824	0.790691	546.931	858.054	673.32	522.555	535.764	632.908
AT1G09575	566.831	-0.672763	0.31043	-2.1672	0.0302198	0.301069	647.488	768.905	674.532	346.379	428.611	535.067
AT1G09580	107.877	-0.341664	0.65865	-0.518734	0.603947	0.912962	52.3222	132.865	176.36	132.878	59.0714	93.7642
AT1G09590	1771.18	-0.101862	0.24169	-0.421458	0.673421	0.931471	1845.99	1984.41	1671.48	1413.88	1865.56	1845.73
AT1G09600	1.74139	-2.77406	3.92824	-0.706184	0.480074	NA	0	9.42916	0	0	0	1.01918
AT1G09610	8.11842	-6.10816	2.97506	-2.05312	0.0400608	0.347224	38.4241	10.2864	0	0	0	0
AT1G09620	638.105	-0.379147	0.325777	-1.16382	0.244495	0.721203	687.547	753.476	724.228	543.457	394.268	725.653
AT1G09625	0.136256	-0.19541	4.08047	-0.047889	0.961805	NA	0.817535	0	0	0	0	0
AT1G09630	218.203	0.67017	0.50971	1.31481	0.188575	0.660633	179.858	86.5769	238.177	338.914	276.125	189.567
AT1G09640	874.357	-0.175669	0.268194	-0.655005	0.512464	0.879585	1013.74	887.199	881.801	913.724	677.261	872.415
AT1G09645	375.782	0.847649	0.408019	2.07748	0.0377575	0.337886	218.282	278.589	307.873	533.006	630.553	286.388
AT1G09650	7.24466	0.643706	3.30153	0.194972	0.845415	0.973284	0	0	16.9694	0	0	26.4986
AT1G09660	546.528	-0.451571	0.413536	-1.09197	0.274844	0.747182	788.104	502.317	603.625	285.166	715.726	384.229
AT1G09665	0.915836	3.72165	3.96921	0.937632	0.348434	NA	0	0	0	0	5.49502	0
AT1G09680	13.717	-2.22572	1.93269	-1.15162	0.249478	0.725609	7.35781	18.8583	41.8174	0	0	14.2685
AT1G09690	6428.58	0.483783	0.252238	1.91796	0.0551159	0.400382	5901.78	4999.17	5180.5	9738.93	6208	6543.11
AT1G09700	107.555	-0.420528	0.703621	-0.597663	0.550065	0.891896	48.2346	170.582	150.3	149.301	49.4552	77.4574
AT1G09710	48.4191	-1.58678	0.769223	-2.06284	0.0391279	0.342725	76.8483	77.1477	64.2412	23.8882	13.7375	34.652
AT1G09720	2.58886	-4.45876	3.91979	-1.1375	0.255329	NA	15.5332	0	0	0	0	0
AT1G09730	389.693	0.337937	0.321781	1.05021	0.293623	0.763962	329.467	328.306	374.538	434.467	501.42	369.961
AT1G09740	260.419	0.0832633	0.660007	0.126155	0.899609	0.985518	346.635	234.015	177.572	524.048	217.053	63.1889
AT1G09750	392.469	-0.329814	0.312631	-1.05496	0.291442	0.761956	411.22	427.741	472.718	329.956	322.832	390.344
AT1G09760	340.167	-0.0324867	0.396062	-0.0820242	0.934627	0.990502	407.132	329.164	295.146	401.621	392.894	215.046
AT1G09770	702.505	-0.32318	0.338014	-0.956114	0.339015	0.79197	988.4	628.325	726.652	586.754	476.693	808.206
AT1G09780	656.775	-0.0925674	0.316437	-0.292531	0.769881	0.958157	866.587	568.321	598.776	709.181	526.148	671.637
AT1G09790	0	NA	NA	NA	NA	NA	0	0	0	0	0	0
AT1G09794	53.9811	1.15999	0.796667	1.45606	0.145377	0.603166	36.7891	14.5723	48.4839	107.497	64.5665	51.978
AT1G09795	800.178	0.330452	0.344391	0.959526	0.337294	0.790811	734.146	637.754	755.743	580.782	842.111	1250.53
AT1G09800	151.887	0.894549	0.508535	1.75907	0.0785654	0.468863	92.3814	81.4337	144.846	134.371	219.801	238.487
AT1G09810	110.885	0.82487	0.592669	1.39179	0.163986	0.629537	57.2274	128.58	54.5444	111.976	166.224	146.761
AT1G09812	0	NA	NA	NA	NA	NA	0	0	0	0	0	0
AT1G09815	277.475	1.50445	0.596357	2.52273	0.0116447	0.190867	46.5995	163.725	223.026	535.992	479.44	216.065
AT1G09820	26.3467	-1.19653	1.74705	-0.684887	0.493415	0.870835	37.6066	50.5746	21.8178	0	48.0814	0
AT1G09830	245.623	0.303495	0.463937	0.654174	0.513	0.879585	149.609	266.588	243.632	304.575	164.851	344.481
AT1G09840	644.668	0.0811746	0.314208	0.258347	0.796139	0.964314	510.959	648.898	719.986	509.118	743.201	735.845
AT1G09850	205.294	-0.687128	0.519862	-1.32175	0.186251	0.658864	225.64	253.73	281.207	129.892	82.4253	258.871
AT1G09860	12.3853	0.302802	1.72213	0.17583	0.860427	0.976616	17.1682	12.0008	4.24234	0	12.3638	28.5369
AT1G09870	782.941	0.656695	0.334408	1.96375	0.0495588	0.381228	443.921	825.48	554.535	873.413	847.607	1152.69
AT1G09880	18.4687	-0.813203	1.93851	-0.419498	0.674852	0.932047	10.628	47.1458	12.727	40.3114	0	0
AT1G09890	6.77569	-5.84717	3.12003	-1.87408	0.0609195	0.420575	27.7962	12.858	0	0	0	0
AT1G09900	70.0545	-0.863983	0.860791	-1.00371	0.31552	0.779767	95.6516	67.7185	108.483	16.4231	21.9801	110.071
AT1G09910	175.114	-0.8997	0.477815	-1.88295	0.0597078	0.41776	250.166	190.298	244.238	82.1157	112.648	171.222
AT1G09920	583.572	0.610522	0.389682	1.56672	0.11718	0.555758	433.293	465.458	486.657	504.638	1105.87	505.511
AT1G09930	35.4757	0.145203	1.38828	0.104592	0.916699	0.988704	22.891	45.4314	32.7266	0	97.5366	14.2685
AT1G09932	505.172	1.80394	0.474194	3.80422	0.000142251	0.0130623	127.535	265.731	281.207	538.978	1292.7	524.876
AT1G09935	0	NA	NA	NA	NA	NA	0	0	0	0	0	0
AT1G09940	2187.15	0.456147	0.357583	1.27564	0.202083	0.677366	1021.92	2497.87	2013.29	2520.21	1904.02	3165.56
AT1G09950	2348.43	0.399353	0.273577	1.45975	0.14436	0.60229	1485.46	2203.85	2386.62	2366.43	3134.91	2513.29
AT1G09960	33.5316	0.701531	0.875803	0.801014	0.423123	0.838085	28.6137	24.8587	23.0299	64.1996	32.9701	27.5177
AT1G09970	4639.54	0.325198	0.328497	0.989956	0.322196	0.783337	3098.46	5078.03	4181.13	4365.57	3577.26	7536.81
AT1G09980	382.072	0.198627	0.320323	0.620084	0.535203	0.886102	393.234	349.736	324.236	455.369	412.126	357.731
AT1G09995	338.797	1.19358	0.369834	3.22734	0.00124946	0.0527541	219.917	158.581	239.389	459.848	572.856	382.191
AT1G10000	139.789	-0.444051	0.690984	-0.642635	0.520461	0.881091	133.258	162.01	188.481	25.3812	163.477	166.126
AT1G10010	16.1628	3.38141	2.24304	1.50751	0.13168	0.581272	0	8.57197	0	0	38.4651	49.9396
AT1G10020	663.11	-0.373452	0.334087	-1.11783	0.263639	0.737183	492.156	881.198	872.104	574.81	527.522	630.87
AT1G10030	159.84	0.00160974	0.546454	0.00294579	0.99765	0.999604	127.535	167.153	184.845	170.204	76.9302	232.372
AT1G10040	68.6525	0.971632	0.728993	1.33284	0.182584	0.654622	53.1398	49.7174	36.3629	126.906	35.7176	110.071
AT1G10050	118.563	0.246194	0.563234	0.437107	0.662034	0.927461	108.732	79.7193	136.967	146.315	75.5565	164.087
AT1G10060	67.9898	-0.0441207	2.72815	-0.0161724	0.987097	0.998209	125.083	25.7159	56.3625	0	0	200.778
AT1G10070	427.75	-0.334229	0.70027	-0.477286	0.633158	0.920876	526.492	645.469	258.783	655.433	435.48	44.8437
AT1G10090	862.789	0.620777	0.332489	1.86706	0.0618928	0.423156	542.843	888.913	609.079	825.636	954.759	1355.5
AT1G10095	259.744	2.40218	0.498526	4.81858	1.45e-06	0.00046911	103.009	74.5761	70.3017	446.411	651.16	213.008
AT1G10100	0.571464	-2.26918	3.96578	-0.572189	0.567194	NA	0	3.42879	0	0	0	0
AT1G10110	10.86	2.8054	2.10065	1.33549	0.181717	0.653056	0	5.14318	3.03024	0	23.3538	33.6328
AT1G10120	161.204	-0.0884753	0.453061	-0.195283	0.845171	0.973284	131.623	164.582	201.814	173.19	167.598	128.416
AT1G10130	543.739	-0.0800018	0.46318	-0.172723	0.862869	0.976885	461.907	673.757	541.808	240.375	467.077	877.51
AT1G10140	696.02	0.0305337	0.480505	0.063545	0.949333	0.992263	653.21	876.912	535.141	1142.16	704.736	263.967
AT1G10150	371.133	-0.948125	0.354145	-2.67723	0.00742344	0.147011	512.594	497.174	456.961	304.575	181.336	274.158
AT1G10155	8.08334	-0.280107	2.02704	-0.138185	0.890094	0.983634	0.817535	13.7151	12.121	0	9.61628	12.2301
AT1G10160.1	125.168	0.74561	0.656535	1.13568	0.256093	0.731419	102.192	84.8625	93.9376	107.497	65.9402	296.58
AT1G10170	321.283	-0.601914	0.425731	-1.41384	0.15741	0.620342	371.161	474.887	316.963	220.966	171.719	371.999
AT1G10180	128.711	-0.309508	0.503168	-0.61512	0.538476	0.887765	185.58	141.437	100.604	104.511	120.89	119.244
AT1G10190	0	NA	NA	NA	NA	NA	0	0	0	0	0	0
AT1G10200	770.233	-0.534817	0.348537	-1.53446	0.124916	0.569029	835.521	808.336	1090.89	637.517	405.258	843.878
AT1G10210	100.245	0.0414722	0.960438	0.0431805	0.965558	0.995618	119.36	70.2901	106.665	197.078	4.12126	103.956
AT1G10220	13.3075	-0.0288943	1.70174	-0.0169793	0.986453	0.997972	17.1682	4.28598	18.7875	1.49301	37.0914	1.01918
AT1G10230	54.1203	-0.0839781	1.24762	-0.0673105	0.946334	0.991647	27.7962	72.8617	66.6654	0	41.2126	116.186
AT1G10240	42.0099	-0.857578	0.810831	-1.05765	0.290214	0.760785	61.3151	36.0023	64.8472	35.8323	35.7176	18.3452
AT1G10250	0	NA	NA	NA	NA	NA	0	0	0	0	0	0
AT1G10260.1	0.477795	2.76965	4.02654	0.687849	0.491548	NA	0	0	0	1.49301	1.37375	0
AT1G10270	18.9105	-1.20681	2.26878	-0.531922	0.59478	0.910767	0	44.5742	34.5448	0	34.3439	0
AT1G10280	78.46	0.418994	0.691603	0.60583	0.544627	0.889476	80.9359	35.1451	85.4529	50.7625	96.1628	122.301
AT1G10290	615.271	0.205688	0.307608	0.668669	0.503707	0.875605	548.566	702.901	463.021	688.279	717.1	571.758
AT1G10300	13.2777	5.2267	2.53858	2.05891	0.0395027	0.344371	0.817535	0	1.2121	77.6367	0	0
AT1G10310	703.454	0.0556969	0.363134	0.153378	0.8781	0.980002	712.89	738.904	617.564	1037.64	449.218	664.503
AT1G10320	561.629	1.74903	0.5878	2.97556	0.00292459	0.0888079	425.118	234.872	112.725	1400.45	920.415	276.197
AT1G10330	6.97121	-5.89186	2.6459	-2.22679	0.0259613	0.284563	9.81042	1.71439	30.3024	0	0	0
AT1G10340	96.0432	-0.0377385	1.02833	-0.0366986	0.970725	0.996841	147.156	81.4337	63.0291	255.305	10.99	18.3452
AT1G10350	229.751	-0.227773	0.405931	-0.561114	0.57472	0.902858	306.576	234.872	202.42	171.697	241.781	221.161
AT1G10360	726.646	-0.660659	0.418359	-1.57917	0.114298	0.550205	896.018	755.19	1020.59	322.491	429.985	935.603
AT1G10370	1977.21	0.652832	0.357696	1.8251	0.0679856	0.440627	1845.18	1272.08	1494.52	3519.03	1343.53	2388.95
AT1G10380	16.3319	-1.34144	1.94131	-0.690998	0.489567	0.869504	41.6943	5.14318	23.6359	0	0	27.5177
AT1G10385	0	NA	NA	NA	NA	NA	0	0	0	0	0	0
AT1G10390	308.694	-0.567162	0.375509	-1.51038	0.130946	0.579877	349.905	429.456	327.266	192.599	239.033	313.906
AT1G10400	41.4807	1.17842	0.894195	1.31786	0.18755	0.659882	30.2488	18.0011	27.8782	46.2834	103.032	23.441
AT1G10410	636.075	0.848688	0.443938	1.91173	0.055911	0.402522	501.149	451.743	409.689	441.932	1421.84	590.103
AT1G10417	71.7009	0.35612	0.773435	0.460439	0.645201	0.923449	59.68	53.1462	75.7561	31.3533	155.234	55.0355
AT1G10419	0	NA	NA	NA	NA	NA	0	0	0	0	0	0
AT1G10430	605.205	0.891219	0.324404	2.74725	0.00600969	0.131217	403.862	403.74	463.627	912.231	898.435	549.336
AT1G10440	0	NA	NA	NA	NA	NA	0	0	0	0	0	0
AT1G10450	35.4069	-0.238577	1.18096	-0.20202	0.839901	0.972565	20.4384	26.5731	67.8775	2.98603	74.1827	20.3835
AT1G10455	0	NA	NA	NA	NA	NA	0	0	0	0	0	0
AT1G10460	6.60473	-2.1597	2.93737	-0.735249	0.462188	0.856842	1.63507	30.8591	0	0	0	7.13423
AT1G10470	1924.86	0.444064	0.29758	1.49225	0.135633	0.587908	1233.66	1723.82	1935.11	1684.12	2814.82	2157.6
AT1G10480	0.545023	-2.20523	3.96843	-0.555694	0.57842	NA	3.27014	0	0	0	0	0
AT1G10490	74.9509	-0.264277	0.969712	-0.272532	0.785213	0.961706	103.009	103.721	38.7871	5.97205	140.123	58.093
AT1G10500	308.167	-0.553925	0.358516	-1.54505	0.122334	0.565673	336.007	320.592	443.022	276.207	214.306	258.871
AT1G10510	329.988	-0.0530784	0.372233	-0.142595	0.88661	0.982112	400.592	366.023	241.813	294.124	373.661	303.714
AT1G10520	12.6278	-0.20237	2.09403	-0.096641	0.923011	0.989551	0	22.2871	18.1815	11.9441	23.3538	0
AT1G10522	393.394	0.266632	0.373446	0.713977	0.475241	0.863902	372.796	417.455	281.207	373.253	574.229	341.424
AT1G10530	32.3302	0.880197	1.11086	0.792357	0.428153	0.840427	13.8981	11.1436	43.0295	80.6227	9.61628	35.6712
AT1G10538	0	NA	NA	NA	NA	NA	0	0	0	0	0	0
AT1G10540	0.272512	-1.19867	4.02955	-0.297469	0.766108	NA	1.63507	0	0	0	0	0
AT1G10550	186.35	-0.401687	0.566716	-0.708798	0.47845	0.864968	169.23	262.302	204.238	216.487	204.689	61.1506
AT1G10560	679.825	0.59044	0.407112	1.45031	0.146971	0.606291	316.386	573.465	738.167	546.443	816.01	1088.48
AT1G10570	831.315	0.227222	0.343284	0.661907	0.508031	0.877585	1103.67	565.75	629.079	803.241	847.607	1038.54
AT1G10580	673.686	0.769951	0.389858	1.97495	0.0482735	0.376952	479.075	474.887	539.383	1228.75	865.465	454.552
AT1G10585	143.963	0.385559	0.777841	0.495679	0.620121	0.917679	161.054	50.5746	162.421	356.83	68.6877	64.2081
AT1G10586	0.545023	-2.20523	3.96843	-0.555694	0.57842	NA	3.27014	0	0	0	0	0
AT1G10588	4.00804	2.48129	3.33771	0.743412	0.457232	NA	2.4526	0	1.2121	0	0	20.3835
AT1G10590	2623.27	0.539798	0.214578	2.51562	0.0118823	0.193054	2010.32	2058.99	2344.8	3289.11	2842.3	3194.1
AT1G10600	289.82	-0.714269	0.522245	-1.36769	0.17141	0.641082	258.341	430.313	392.72	141.836	126.385	389.325
AT1G10610	217.599	0.825729	0.393759	2.09704	0.0359901	0.330637	179.858	136.294	154.542	320.998	273.377	240.526
AT1G10620	4.19931	2.7274	2.79013	0.977516	0.328314	NA	1.63507	1.71439	0	0	9.61628	12.2301
AT1G10630	1496.55	0.0244598	0.267756	0.0913513	0.927213	0.989631	1374.28	1408.37	1669.66	1327.29	1300.95	1898.72
AT1G10640	63.7097	-0.122723	1.28762	-0.0953101	0.924069	0.989631	49.0521	33.4307	116.967	26.8742	0	155.934
AT1G10650	229.111	-0.0343423	0.408931	-0.0839808	0.933072	0.990502	213.377	248.587	233.935	229.924	163.477	285.369
AT1G10652	0	NA	NA	NA	NA	NA	0	0	0	0	0	0
AT1G10657	68.3597	0.101683	1.2216	0.0832377	0.933663	0.990502	23.7085	69.4329	104.846	0	79.6778	132.493
AT1G10660	339.949	-0.808832	0.382351	-2.11542	0.0343944	0.323927	376.066	454.314	468.476	270.235	164.851	305.753
AT1G10670	2446.97	0.216004	0.289309	0.74662	0.455293	0.853137	2244.13	2071.84	2475.71	3553.37	1868.31	2468.44
AT1G10680	3.356	1.65132	3.79127	0.435558	0.663158	NA	0	0	4.84839	0	0	15.2876
AT1G10682	33.0272	-0.921692	0.911856	-1.01079	0.312119	0.777481	63.7677	24.0015	41.8174	31.3533	17.8588	19.3643
AT1G10690	63.1934	-0.653321	0.650666	-1.00408	0.315339	0.779717	80.9359	79.7193	70.9077	64.1996	46.7077	36.6903
AT1G10700	1199.48	0.153991	0.267952	0.574696	0.565497	0.899069	1157.63	1242.94	1006.65	1003.3	1468.54	1317.79
AT1G10705	0	NA	NA	NA	NA	NA	0	0	0	0	0	0
AT1G10710	0.136256	-0.19541	4.08047	-0.047889	0.961805	NA	0.817535	0	0	0	0	0
AT1G10717	0	NA	NA	NA	NA	NA	0	0	0	0	0	0
AT1G10720	604.152	0.812867	0.351393	2.31327	0.0207077	0.255692	416.125	511.746	386.659	1003.3	799.525	507.55
AT1G10730	52.3032	-0.174548	0.820516	-0.21273	0.831537	0.971293	58.8625	24.0015	83.6347	31.3533	42.5864	73.3807
AT1G10740	724.117	-0.0416208	0.287561	-0.144737	0.884919	0.981746	650.758	642.898	909.679	725.604	671.766	743.998
AT1G10745	0	NA	NA	NA	NA	NA	0	0	0	0	0	0
AT1G10747	1.01008	-3.11306	3.93977	-0.790162	0.429433	NA	0	0	6.06049	0	0	0
AT1G10750	0	NA	NA	NA	NA	NA	0	0	0	0	0	0
AT1G10760	753.275	-0.17662	0.28723	-0.614908	0.538615	0.887765	842.878	736.332	819.378	697.237	568.734	855.089
AT1G10770	3.8923	5.81358	3.92151	1.48248	0.138212	NA	0	0	0	0	23.3538	0
AT1G10780	16.0212	0.790138	2.38148	0.331784	0.740052	0.950851	0	0	35.1508	0	46.7077	14.2685
AT1G10790	2.51855	5.18479	3.92955	1.31944	0.187023	NA	0	0	0	0	15.1113	0
AT1G10800	0	NA	NA	NA	NA	NA	0	0	0	0	0	0
AT1G10810	30.8282	0.766093	1.379	0.555542	0.578524	0.904648	20.4384	30.0019	18.1815	35.8323	0	80.5149
AT1G10820	211.031	-0.691823	0.748581	-0.92418	0.355393	0.798434	280.414	315.448	186.663	16.4231	230.791	236.449
AT1G10830	623.701	-0.00253602	0.307902	-0.00823644	0.993428	0.999	528.127	543.463	800.59	606.163	667.645	596.218
AT1G10840	1017.91	0.0998648	0.358866	0.278279	0.780799	0.960582	1008.02	952.346	986.647	1528.85	1030.32	601.314
AT1G10850	185.111	-0.186745	0.571232	-0.326916	0.743731	0.952092	125.9	158.581	306.661	88.0878	250.023	181.413
AT1G10865	410.238	0.0392789	0.362632	0.108316	0.913745	0.988166	289.407	545.177	379.386	437.453	417.621	392.383
AT1G10870	236.996	-0.0650015	0.442531	-0.146886	0.883222	0.981287	215.012	317.163	195.148	271.728	153.86	269.062
AT1G10880	0	NA	NA	NA	NA	NA	0	0	0	0	0	0
AT1G10890	2454.22	0.564052	0.222029	2.54044	0.0110714	0.185319	2137.85	1860.97	1942.39	3295.08	2617	2872.04
AT1G10900	698.755	-0.0466632	0.442375	-0.105483	0.915992	0.988704	897.653	540.891	691.502	374.746	1160.82	526.914
AT1G10910	475.761	-0.0731807	0.306869	-0.238475	0.811513	0.967286	513.412	538.32	412.113	413.565	512.41	464.744
AT1G10920	331.141	0.143543	0.39576	0.362703	0.716827	0.945721	243.625	340.307	359.387	452.383	347.56	243.583
AT1G10930	85.6221	0.348539	0.829814	0.420021	0.67447	0.931926	89.1113	113.15	23.6359	182.148	65.9402	39.7479
AT1G10940	1182.87	0.496757	0.289983	1.71306	0.0867018	0.491219	1096.31	907.771	938.769	1624.4	1541.35	988.601
AT1G10950	1042.36	-0.729368	0.254842	-2.86204	0.00420927	0.106695	1097.13	1326.94	1476.94	797.269	748.696	807.187
AT1G10960	4577.89	-0.167477	0.235049	-0.712519	0.476144	0.863902	5795.5	4334.84	4399.31	4938.89	3894.59	4104.22
AT1G10970	16.8048	7.92727	1.89412	4.18519	2.85e-05	0.00417039	0	0	0	22.3952	27.4751	50.9588
AT1G10980	2.21964	4.99884	3.93267	1.27111	0.203691	NA	0	0	0	11.9441	1.37375	0
AT1G10990	30.5104	-0.986143	1.68646	-0.584743	0.558721	0.896228	31.8839	44.5742	45.4537	0	0	61.1506
AT1G11000	330.706	0.00501783	0.599532	0.00836958	0.993322	0.998967	299.218	465.458	226.662	108.99	245.902	638.004
AT1G11010	0	NA	NA	NA	NA	NA	0	0	0	0	0	0
AT1G11020	187.714	-1.02014	0.463731	-2.19985	0.0278173	0.291222	171.682	247.73	334.539	149.301	109.9	113.129
AT1G11030	0	NA	NA	NA	NA	NA	0	0	0	0	0	0
AT1G11040	0	NA	NA	NA	NA	NA	0	0	0	0	0	0
AT1G11050	341.565	-1.23318	0.529426	-2.32928	0.0198443	0.249715	394.869	444.028	599.988	82.1157	167.598	360.788
AT1G11055	0	NA	NA	NA	NA	NA	0	0	0	0	0	0
AT1G11060	144.723	-0.356252	0.518578	-0.686978	0.492097	0.870298	232.18	123.436	132.119	92.5668	152.487	135.55
AT1G11070	6.13704	-1.36612	2.56073	-0.53349	0.593694	0.910409	1.63507	2.57159	22.4238	0	0	10.1918
AT1G11080	0.877583	-1.6188	3.9544	-0.409366	0.682271	NA	0.817535	3.42879	0	0	0	1.01918
AT1G11090	159.559	-0.255701	0.542664	-0.471196	0.637501	0.921226	105.462	210.013	205.451	94.0598	212.932	129.435
AT1G11100	15.5793	-0.0129246	2.02309	-0.00638852	0.994903	0.999048	37.6066	9.42916	0	0	21.9801	24.4602
AT1G11110	0	NA	NA	NA	NA	NA	0	0	0	0	0	0
AT1G11112	12.0642	1.68946	2.95462	0.571802	0.567456	0.900299	0	17.1439	0	55.2415	0	0
AT1G11120	18.1993	-1.76478	1.53696	-1.14823	0.250874	0.727023	13.0806	46.2886	24.848	20.9022	0	4.0767
AT1G11125	7.46507	6.75226	3.58777	1.88202	0.0598333	0.41776	0	0	0	44.7904	0	0
AT1G11130	44.9675	-1.1159	1.21573	-0.917886	0.358679	0.80055	65.4028	66.8613	52.7262	0	20.6063	64.2081
AT1G11145	0	NA	NA	NA	NA	NA	0	0	0	0	0	0
AT1G11150.1	93.1367	-0.120859	0.689985	-0.175161	0.860953	0.976757	138.981	96.8632	55.7565	76.1437	45.3339	145.742
AT1G11160	9.82019	-1.76755	2.5452	-0.694463	0.487392	0.868757	0	21.4299	24.2419	0	0	13.2493
AT1G11170	16.0168	-2.17247	1.6983	-1.27921	0.200825	0.675674	51.5047	18.0011	9.09073	0	16.4851	1.01918
AT1G11175	692.015	0.881739	0.308594	2.85728	0.00427292	0.107657	542.843	562.321	356.357	839.073	847.607	1003.89
AT1G11180	477.356	0.31947	0.297162	1.07507	0.282343	0.753427	387.511	424.312	461.809	576.303	545.381	468.821
AT1G11185	22.9972	0.886968	1.51881	0.583987	0.559229	0.896466	5.72274	11.1436	31.5145	0	54.9502	34.652
AT1G11190	26.4336	-21.8904	2.71996	-8.04804	NA	NA	158.602	0	0	0	0	0
AT1G11200	384.324	-0.489467	0.358333	-1.36595	0.171953	0.641882	415.308	463.743	468.476	231.417	313.216	413.785
AT1G11210	1291.39	0.451263	0.333532	1.35299	0.17606	0.647031	999.027	891.485	1382.4	992.854	1982.33	1500.23
AT1G11220	0.136256	-0.19541	4.08047	-0.047889	0.961805	NA	0.817535	0	0	0	0	0
AT1G11230	0	NA	NA	NA	NA	NA	0	0	0	0	0	0
AT1G11240	187.632	0.294335	0.443969	0.662962	0.507355	0.877381	160.237	206.584	138.785	201.557	259.64	158.991
AT1G11250	0	NA	NA	NA	NA	NA	0	0	0	0	0	0
AT1G11260	3881.46	0.168981	0.393224	0.429733	0.66739	0.928852	2205.71	4810.59	3945.98	6340.83	3648.69	2336.97
AT1G11265.1	3.54186	2.41505	2.65751	0.908762	0.363476	NA	0.817535	2.57159	0	4.47904	12.3638	1.01918
AT1G11270	117.646	-0.783104	1.06322	-0.736539	0.461403	0.856371	192.121	109.721	144.846	0	123.638	135.55
AT1G11280	147.386	-0.22085	0.441464	-0.500268	0.616886	0.91744	178.223	151.724	146.058	125.413	148.365	134.531
AT1G11290	41.0364	-3.30328	1.10059	-3.00138	0.00268762	0.083578	87.4762	73.7189	62.423	0	16.4851	6.11506
AT1G11300	286.744	0.196907	0.640018	0.307659	0.758342	0.954091	150.426	325.735	326.054	183.641	105.779	628.832
AT1G11310	2453.82	0.0526937	0.256656	0.205309	0.837331	0.972565	2306.27	2400.15	2521.77	2115.6	2163.66	3215.5
AT1G11320	15.9122	0.149276	1.61058	0.0926846	0.926154	0.989631	6.54028	10.2864	28.4843	0	20.6063	29.5561
AT1G11330	159.679	0.411686	0.697891	0.589901	0.555257	0.894378	177.405	96.006	138.179	41.8044	174.467	330.213
AT1G11340	43.1119	-0.353885	0.982481	-0.360195	0.718701	0.945782	79.3009	30.0019	35.7569	68.6786	8.24253	36.6903
AT1G11350	513.746	-0.162436	0.506723	-0.320561	0.748543	0.95275	383.424	581.179	664.229	241.868	311.842	899.932
AT1G11360	913.047	0.27543	0.301388	0.913874	0.360783	0.801702	739.869	894.913	843.014	1325.8	833.869	840.82
AT1G11362	12.2872	1.33098	2.14853	0.619482	0.535599	0.886102	0	5.14318	15.7573	0	46.7077	6.11506
AT1G11370	1.40121	-0.0549431	3.86041	-0.0142324	0.988645	NA	0	4.28598	0	0	4.12126	0
AT1G11380	369.002	-0.401576	0.401645	-0.999828	0.317394	0.780041	354.81	424.312	479.991	432.974	324.206	197.72
AT1G11390	142.336	-0.22596	0.573953	-0.393691	0.693809	0.93897	123.448	187.726	149.694	58.2275	152.487	182.432
AT1G11400	349.605	0.432643	0.452391	0.956347	0.338897	0.79197	467.63	157.724	267.267	418.044	423.116	363.846
AT1G11410	384.214	-0.334646	0.456257	-0.733459	0.463279	0.857815	309.846	453.457	523.02	167.217	381.904	469.84
AT1G11420	1.00006	-3.08135	3.9405	-0.78197	0.434232	NA	0	6.00038	0	0	0	0
AT1G11430	1801.38	-0.036515	0.231117	-0.157994	0.874462	0.979784	1913.85	2006.7	1552.7	1730.4	1740.55	1864.07
AT1G11440	279.373	-0.619969	0.658913	-0.940897	0.346758	0.793597	388.329	239.158	387.871	55.2415	462.955	142.685
AT1G11450	11.3399	0.580725	2.98101	0.194808	0.845543	0.973284	0	0	27.2722	0	0	40.767
AT1G11460	2.38356	-2.52042	3.90397	-0.645605	0.518535	NA	12.263	0	0	0	0	2.03835
AT1G11470	0.953791	-3.01558	3.94207	-0.764976	0.444286	NA	5.72274	0	0	0	0	0
AT1G11475	493.589	0.746919	0.466037	1.6027	0.109	0.539514	437.381	335.164	332.721	794.283	817.384	244.602
AT1G11480	588.906	0.127381	0.316735	0.402169	0.68756	0.937009	618.056	536.605	533.929	525.541	799.525	519.78
AT1G11482	24.7196	-0.378705	1.63845	-0.231137	0.817208	0.96848	66.2203	1.71439	15.7573	61.2135	1.37375	2.03835
AT1G11490	6.16572	1.14456	3.43155	0.333542	0.738725	0.950406	0	0	11.5149	0	0	25.4794
AT1G11500	0	NA	NA	NA	NA	NA	0	0	0	0	0	0
AT1G11510	0	NA	NA	NA	NA	NA	0	0	0	0	0	0
AT1G11520	0	NA	NA	NA	NA	NA	0	0	0	0	0	0
AT1G11530	680.303	0.306394	0.375972	0.814936	0.415109	0.834818	433.293	682.329	708.471	970.459	821.505	465.763
AT1G11540	9.39681	-0.80572	2.00818	-0.401219	0.688259	0.937056	0.817535	6.00038	29.0903	0	8.24253	12.2301
AT1G11545	463.642	0.434878	0.468653	0.927931	0.353443	0.797287	159.419	498.888	524.232	644.982	443.723	510.607
AT1G11550	0	NA	NA	NA	NA	NA	0	0	0	0	0	0
AT1G11560	0	NA	NA	NA	NA	NA	0	0	0	0	0	0
AT1G11570	0	NA	NA	NA	NA	NA	0	0	0	0	0	0
AT1G11572	0	NA	NA	NA	NA	NA	0	0	0	0	0	0
AT1G11580	207.334	-0.0959308	0.87915	-0.109118	0.913109	0.988166	362.985	114.864	164.845	13.4371	453.339	134.531
AT1G11590	0	NA	NA	NA	NA	NA	0	0	0	0	0	0
AT1G11592	110.77	-0.364985	0.633869	-0.575806	0.564746	0.898902	170.865	131.151	72.7258	55.2415	83.799	150.838
AT1G11593	0	NA	NA	NA	NA	NA	0	0	0	0	0	0
AT1G11595	0	NA	NA	NA	NA	NA	0	0	0	0	0	0
AT1G11600	0	NA	NA	NA	NA	NA	0	0	0	0	0	0
AT1G11608	0	NA	NA	NA	NA	NA	0	0	0	0	0	0
AT1G11610	0	NA	NA	NA	NA	NA	0	0	0	0	0	0
AT1G11620	0	NA	NA	NA	NA	NA	0	0	0	0	0	0
AT1G11630	71.0003	0.591732	0.741201	0.798342	0.424672	0.838617	58.045	82.2909	29.6964	56.7345	140.123	59.1122
AT1G11640	0	NA	NA	NA	NA	NA	0	0	0	0	0	0
AT1G11650	2633.97	-0.232211	0.240522	-0.965448	0.334321	0.790012	3329.82	2730.17	2477.53	2305.21	2174.65	2786.43
AT1G11655	0	NA	NA	NA	NA	NA	0	0	0	0	0	0
AT1G11660	231.245	0.611145	0.4343	1.40719	0.15937	0.623846	229.727	124.294	194.542	343.393	269.256	226.257
AT1G11670	2264.14	0.63855	0.278184	2.29543	0.0217087	0.261999	1954.73	2100.13	1258.76	3150.26	2695.31	2425.64
AT1G11680	1161.23	-0.280686	0.30557	-0.918567	0.358322	0.800458	1687.39	1002.06	1131.49	1194.41	1094.88	857.127
AT1G11684	0	NA	NA	NA	NA	NA	0	0	0	0	0	0
AT1G11690	2.51855	5.18479	3.92955	1.31944	0.187023	NA	0	0	0	0	15.1113	0
AT1G11700	16.3445	-1.65014	1.86124	-0.886579	0.375306	0.8105	36.7891	25.7159	12.121	0	0	23.441
AT1G11710	2.82823	-4.59179	3.91865	-1.17178	0.241285	NA	0	0	16.9694	0	0	0
AT1G11720	956.137	0.286786	0.307982	0.931176	0.351763	0.796392	1069.34	836.624	678.169	1316.84	909.425	926.431
AT1G11730	15.6542	0.724777	2.02311	0.358249	0.720157	0.946036	0	6.85757	28.4843	0	45.3339	13.2493
AT1G11735	0	NA	NA	NA	NA	NA	0	0	0	0	0	0
AT1G11740	74.8977	0.26555	0.831385	0.319407	0.749418	0.95275	62.9502	77.1477	63.6351	167.217	59.0714	19.3643
AT1G11750	2751.3	-0.257507	0.283477	-0.908388	0.363673	0.803171	3109.9	2863.04	3016.91	2299.24	1810.61	3408.12
AT1G11755	97.465	-0.166945	0.800272	-0.20861	0.834753	0.971777	122.63	76.2905	110.907	43.2974	28.8488	202.816
AT1G11760	233.216	0.656206	0.486858	1.34784	0.177711	0.649094	209.289	130.294	203.026	410.579	287.115	158.991
AT1G11765	0	NA	NA	NA	NA	NA	0	0	0	0	0	0
AT1G11770	4.35653	-1.12612	3.78027	-0.297894	0.765784	NA	17.9858	0	0	0	0	8.15341
AT1G11780	396.29	0.687551	0.530044	1.29716	0.194577	0.667519	259.976	364.309	286.055	655.433	662.15	149.819
AT1G11785	9.25854	2.39207	2.40494	0.994646	0.319908	0.781976	0.817535	2.57159	5.45444	0	46.7077	0
AT1G11790	662.568	-0.139812	0.370174	-0.377693	0.705658	0.942831	653.21	724.331	707.259	601.684	377.782	911.143
AT1G11800	147.922	1.51196	0.567911	2.66232	0.00776037	0.149724	52.3222	91.72	86.0589	344.886	188.204	124.339
AT1G11803	0	NA	NA	NA	NA	NA	0	0	0	0	0	0
AT1G11806	0	NA	NA	NA	NA	NA	0	0	0	0	0	0
AT1G11810	1.52876	4.47918	3.94384	1.13574	0.256066	NA	0	0	0	0	0	9.17258
AT1G11820	286.407	-0.321614	0.407726	-0.788801	0.430228	0.841396	331.102	299.162	324.236	182.148	362.671	219.123
AT1G11840	3169.3	-0.0803809	0.280548	-0.286514	0.774484	0.958907	3907	2629.88	3236.91	2370.91	2937.09	3934.02
AT1G11850	9.35521	-0.685204	2.22103	-0.308508	0.757696	0.954069	4.08767	9.42916	21.2117	0	0	21.4027
AT1G11860	16258.4	0.461535	0.249994	1.84618	0.0648654	0.431262	15231.5	11651	14155.5	23667.2	18009.9	14835.1
AT1G11870	293.171	-0.176833	0.469548	-0.376603	0.706469	0.943322	308.211	265.731	359.993	132.878	300.852	391.364
AT1G11880	94.0481	0.552427	0.584626	0.944923	0.344698	0.793318	53.1398	103.721	72.1198	83.6087	122.264	129.435
AT1G11890	780.55	-0.0562303	0.31067	-0.180997	0.85637	0.97514	721.883	827.195	838.771	531.513	887.445	876.491
AT1G11900	66.0994	-0.749836	1.13786	-0.658989	0.509903	0.878745	96.4691	81.4337	70.9077	0	94.7891	52.9971
AT1G11905	117.246	-0.643386	0.885784	-0.726347	0.467626	0.859212	119.36	76.2905	233.329	7.46507	157.982	109.052
AT1G11910	2021.23	-0.766868	0.237238	-3.23248	0.00122721	0.0521619	2822.13	2266.43	2549.04	1731.9	1382	1375.89
AT1G11915	0	NA	NA	NA	NA	NA	0	0	0	0	0	0
AT1G11920	0	NA	NA	NA	NA	NA	0	0	0	0	0	0
AT1G11925	0	NA	NA	NA	NA	NA	0	0	0	0	0	0
AT1G11930	1135.44	-0.0851729	0.281016	-0.30309	0.761822	0.954708	1375.91	1080.93	1050.28	889.836	1339.41	1076.25
AT1G11940	126.702	0.238814	0.676186	0.353178	0.723955	0.947549	36.7891	124.294	187.269	192.599	107.153	112.109
AT1G11950	55.0877	1.51956	1.28351	1.18391	0.236449	0.711693	14.7156	28.2875	42.4234	0	171.719	73.3807
AT1G11960	1846.45	0.937417	0.28862	3.24793	0.00116249	0.0506515	882.12	1649.25	1269.07	2609.79	2351.87	2316.59
AT1G11970	0	NA	NA	NA	NA	NA	0	0	0	0	0	0
AT1G11980	0	NA	NA	NA	NA	NA	0	0	0	0	0	0
AT1G11990	124.497	0.961431	1.2003	0.800992	0.423136	0.838085	108.732	115.722	29.0903	0	391.52	101.918
AT1G12000	763.204	-0.0821454	0.329266	-0.24948	0.802989	0.965144	759.49	911.2	684.835	792.79	501.42	929.488
AT1G12010	21.2844	-1.1673	1.88288	-0.619958	0.535285	0.886102	70.308	0	18.1815	0	13.7375	25.4794
AT1G12013	0.228959	1.72814	4.08047	0.423516	0.671919	NA	0	0	0	0	1.37375	0
AT1G12015	0.457918	2.7162	4.03098	0.673831	0.500419	NA	0	0	0	0	2.74751	0
AT1G12020	44.5471	-1.50718	1.28185	-1.17578	0.239681	0.714551	91.5639	94.2916	12.121	0	31.5964	37.7095
AT1G12030	11.8016	0.317464	2.2548	0.140795	0.888032	0.982904	1.63507	30.0019	0	0	9.61628	29.5561
AT1G12040	0.545023	-2.20523	3.96843	-0.555694	0.57842	NA	3.27014	0	0	0	0	0
AT1G12050	448.587	-0.461297	0.319527	-1.44368	0.148828	0.60943	528.127	420.884	609.685	364.295	414.874	353.654
AT1G12060	118.479	-0.216522	0.504967	-0.428784	0.668081	0.9289	131.623	108.864	141.209	138.85	101.658	88.6683
AT1G12064	0	NA	NA	NA	NA	NA	0	0	0	0	0	0
AT1G12070	11.2249	6.36075	2.46678	2.57857	0.00992111	0.172134	0.817535	0	0	41.8044	24.7276	0
AT1G12080	637.134	0.956361	0.467572	2.04538	0.0408177	0.350695	180.675	573.465	545.444	1172.02	765.181	586.026
AT1G12090	12934.1	-0.608315	0.30356	-2.00393	0.0450772	0.36502	10780	16155.6	19926.9	10970.7	12531.4	7240.23
AT1G12100	5.78171	-4.61676	2.95386	-1.56296	0.118063	0.557134	0	9.42916	24.2419	0	0	1.01918
AT1G12110	280.895	-0.916181	0.431339	-2.12404	0.0336669	0.320408	251.801	377.167	472.718	137.357	244.528	201.797
AT1G12120	716.895	-0.0891672	0.262298	-0.339946	0.733897	0.950035	783.198	773.191	661.199	655.433	704.736	723.615
AT1G12130	0.404032	-1.80539	3.98789	-0.452719	0.650751	NA	0	0	2.42419	0	0	0
AT1G12140	357.748	0.0537654	0.349685	0.153754	0.877804	0.980002	414.49	338.593	299.994	443.425	322.832	327.155
AT1G12150	31.8811	-0.566217	1.32123	-0.428553	0.668248	0.929	48.2346	28.2875	37.575	53.7485	0	23.441
AT1G12160	0	NA	NA	NA	NA	NA	0	0	0	0	0	0
AT1G12170	0	NA	NA	NA	NA	NA	0	0	0	0	0	0
AT1G12180	0	NA	NA	NA	NA	NA	0	0	0	0	0	0
AT1G12190	0	NA	NA	NA	NA	NA	0	0	0	0	0	0
AT1G12200	9.12537	-0.772987	1.97461	-0.391464	0.695454	0.939661	18.8033	6.00038	9.69678	0	19.2326	1.01918
AT1G12210	8.25093	-2.09987	2.179	-0.963686	0.335203	0.790098	17.9858	16.2867	6.06049	0	0	9.17258
AT1G12211	1.09319	1.81965	3.9335	0.462604	0.643648	NA	0	0.857197	0.606049	0	0	5.09588
AT1G12220	110.791	0.0132807	0.564906	0.0235096	0.981244	0.997794	80.1184	128.58	122.422	68.6786	122.264	142.685
AT1G12230	1107.49	-0.247156	0.246536	-1.00252	0.316094	0.779998	1263.91	1295.22	1047.86	1019.73	936.901	1081.35
AT1G12240	1710.77	0.0568545	0.325165	0.174848	0.861199	0.976757	1419.24	1828.4	1782.39	2161.88	2033.16	1039.56
AT1G12244	417.266	-0.00728611	0.311867	-0.0233629	0.981361	0.997794	412.855	390.882	450.9	389.676	482.188	377.095
AT1G12250	1073.76	-0.287202	0.305845	-0.939045	0.347708	0.794471	1447.04	1013.21	1081.19	703.209	1151.21	1046.69
AT1G12260	10.1448	0.0126248	2.42631	0.00520332	0.995848	0.999236	29.4313	0.857197	0	4.47904	26.1013	0
AT1G12270	546.404	0.169072	0.284688	0.593887	0.552588	0.892822	482.346	560.607	500.596	513.597	625.058	596.218
AT1G12280	52.6442	-0.328968	0.98032	-0.335572	0.737194	0.950035	31.8839	68.5757	75.7561	7.46507	34.3439	97.8409
AT1G12290	62.2019	0.719614	0.736073	0.977639	0.328253	0.785797	26.1611	35.1451	79.3924	77.6367	90.6678	64.2081
AT1G12294	0	NA	NA	NA	NA	NA	0	0	0	0	0	0
AT1G12300	52.0349	-0.322307	0.743854	-0.433293	0.664802	0.928652	76.0307	66.0041	31.5145	43.2974	53.5764	41.7862
AT1G12310	957.798	0.423281	0.28555	1.48234	0.13825	0.591424	919.727	682.329	852.104	1346.7	1004.21	941.719
AT1G12320	228.541	1.28065	0.726941	1.7617	0.0781207	0.466917	213.377	19.7155	166.663	164.231	446.47	360.788
AT1G12330	214.403	0.0601521	0.539823	0.111429	0.911276	0.988166	196.208	216.871	216.965	270.235	82.4253	303.714
AT1G12340	5.27028	-1.05786	3.60874	-0.293139	0.769416	NA	0	21.4299	0	0	0	10.1918
AT1G12350	548.162	0.40745	0.301335	1.35215	0.176328	0.647204	549.383	398.596	465.445	700.223	616.816	558.508
AT1G12360	985.553	0.604596	0.30477	1.98378	0.0472805	0.373338	578.815	962.632	804.227	1428.81	1092.13	1046.69
AT1G12370	88.0576	-0.903611	0.631735	-1.43036	0.152612	0.615218	160.237	67.7185	116.361	73.1577	42.5864	68.2848
AT1G12380	24.9428	-0.688711	1.75982	-0.391354	0.695535	0.939664	31.0663	30.0019	31.5145	0	0	57.0739
AT1G12390	335.427	0.307391	0.443552	0.69302	0.488297	0.86921	269.786	214.299	414.537	424.016	465.703	224.219
AT1G12400	204.992	-0.345557	0.573267	-0.602786	0.546651	0.890516	297.583	185.154	206.057	62.7066	230.791	247.66
AT1G12410	2043.72	0.0213225	0.259509	0.082165	0.934515	0.990502	2375.76	2038.41	1671.48	2463.47	1853.19	1860
AT1G12411	0.285732	-1.25867	4.02463	-0.312742	0.754477	NA	0	1.71439	0	0	0	0
AT1G12420	72.0214	1.47974	1.20511	1.22789	0.219487	0.695094	23.7085	43.717	46.6658	0	162.103	155.934
AT1G12423	0	NA	NA	NA	NA	NA	0	0	0	0	0	0
AT1G12430	84.6494	-0.192594	0.671217	-0.286932	0.774164	0.958766	76.8483	105.435	88.4831	47.7764	137.375	51.978
AT1G12440	1384.12	-0.0489589	0.228133	-0.214606	0.830074	0.971206	1506.72	1340.66	1375.73	1251.15	1434.2	1396.27
AT1G12450	208.504	-0.427392	0.463078	-0.922937	0.35604	0.798965	215.829	169.725	331.509	156.766	229.417	147.781
AT1G12451	0	NA	NA	NA	NA	NA	0	0	0	0	0	0
AT1G12460	88.4706	-0.598492	0.732771	-0.816752	0.41407	0.834787	45.7819	169.725	104.24	95.5529	32.9701	82.5532
AT1G12470	276.453	-0.537729	0.42294	-1.27141	0.203584	0.678711	327.014	369.452	286.661	170.204	177.214	328.175
AT1G12480	9.17357	1.24492	2.01657	0.617345	0.537007	0.886881	15.5332	0.857197	0	13.4371	6.86877	18.3452
AT1G12490	0	NA	NA	NA	NA	NA	0	0	0	0	0	0
AT1G12500	754.894	0.374224	0.375096	0.997673	0.318438	0.780823	541.208	600.038	830.287	1003.3	1063.29	491.243
AT1G12510	1.18904	4.11994	3.95425	1.0419	0.297458	NA	0	0	0	0	0	7.13423
AT1G12520	1375.77	0.652678	0.329664	1.97982	0.0477233	0.37476	1222.21	1006.35	979.981	2305.21	1691.09	1049.75
AT1G12530	311.869	0.511842	0.543389	0.941944	0.346221	0.793318	178.223	255.445	336.963	667.377	256.892	176.317
AT1G12540	0	NA	NA	NA	NA	NA	0	0	0	0	0	0
AT1G12550	272.239	0.458265	0.518223	0.8843	0.376534	0.810738	123.448	245.158	318.782	465.82	300.852	179.375
AT1G12560	1.36256	-3.53139	3.93149	-0.898231	0.369063	NA	8.17535	0	0	0	0	0
AT1G12570	15.3543	-7.02748	2.50398	-2.80652	0.00500794	0.117572	26.9786	65.1469	0	0	0	0
AT1G12580	1863.54	0.219589	0.23649	0.928534	0.35313	0.797199	1664.5	1617.53	1882.99	2049.91	2261.2	1705.08
AT1G12590	1.35279	-0.20751	3.59793	-0.0576747	0.954008	NA	0.817535	1.71439	1.81815	0	2.74751	1.01918
AT1G12600	32.9978	1.95366	0.929973	2.10077	0.0356613	0.32917	22.891	6.85757	10.9089	41.8044	64.5665	50.9588
AT1G12610	2531.35	-0.286726	0.351513	-0.815691	0.414677	0.834818	1516.53	3954.25	2875.7	1849.84	2625.24	2366.53
AT1G12620	85.4032	0.304496	0.833164	0.36547	0.714761	0.945313	20.4384	102.006	106.665	158.259	34.3439	90.7067
AT1G12630	3.39693	-4.8521	3.91669	-1.23883	0.215409	NA	15.5332	0	4.84839	0	0	0
AT1G12640	535.629	0.0169207	0.389373	0.0434563	0.965338	0.995562	618.874	382.31	595.746	762.93	362.671	491.243
AT1G12650	225.103	0.340341	0.409679	0.830751	0.406114	0.83123	215.829	151.724	228.48	201.557	278.872	274.158
AT1G12660	0	NA	NA	NA	NA	NA	0	0	0	0	0	0
AT1G12663	0	NA	NA	NA	NA	NA	0	0	0	0	0	0
AT1G12665	0	NA	NA	NA	NA	NA	0	0	0	0	0	0
AT1G12667	0	NA	NA	NA	NA	NA	0	0	0	0	0	0
AT1G12669	0	NA	NA	NA	NA	NA	0	0	0	0	0	0
AT1G12670	0.606049	-2.38266	3.96135	-0.601476	0.547523	NA	0	0	3.63629	0	0	0
AT1G12672	13.9063	0.69285	2.15437	0.321603	0.747754	0.95275	31.8839	0	0	22.3952	26.1013	3.05753
AT1G12680	273.409	-0.049867	0.495634	-0.100612	0.919858	0.989093	376.884	294.018	164.239	250.826	162.103	392.383
AT1G12700	38.2702	0.0270478	1.60874	0.016813	0.986586	0.997972	0.817535	62.5754	50.302	0	101.658	14.2685
AT1G12710	151.247	0.999747	0.680807	1.46847	0.141975	0.597974	34.3365	168.011	99.998	297.11	210.184	97.8409
AT1G12720.1	0	NA	NA	NA	NA	NA	0	0	0	0	0	0
AT1G12725.1	0	NA	NA	NA	NA	NA	0	0	0	0	0	0
AT1G12730	74.6593	1.0054	0.701263	1.4337	0.151659	0.61368	26.9786	57.4322	64.2412	129.892	115.395	54.0163
AT1G12740	0.303024	-1.39758	4.01398	-0.348177	0.727707	NA	0	0	1.81815	0	0	0
AT1G12750	562.579	-0.195588	0.430515	-0.454312	0.649604	0.923916	564.917	649.755	588.473	341.9	340.691	889.741
AT1G12760	859.397	0.0184096	0.276083	0.0666813	0.946835	0.991756	953.246	838.338	770.288	992.854	708.857	892.798
AT1G12770	503.634	-0.0391583	0.365084	-0.107258	0.914584	0.988263	577.18	450.028	503.626	707.688	365.419	417.862
AT1G12775	49.0649	-0.930187	0.789881	-1.17763	0.238944	0.714302	77.6658	80.5765	35.1508	28.3673	24.7276	47.9013
AT1G12780	768.999	-0.179898	0.328576	-0.547507	0.584031	0.906769	641.765	1048.35	759.985	803.241	821.505	539.144
AT1G12790	63.6382	0.659778	0.824058	0.800646	0.423337	0.838263	58.8625	49.7174	39.3932	138.85	20.6063	74.3998
AT1G12800	1341.3	0.151486	0.244285	0.620121	0.535178	0.886102	1501.81	1146.93	1164.22	1446.73	1380.62	1407.48
AT1G12805	0	NA	NA	NA	NA	NA	0	0	0	0	0	0
AT1G12810	357.292	-0.264735	0.398261	-0.664726	0.506226	0.876752	525.675	247.73	396.356	370.267	285.741	317.983
AT1G12820	496.366	-0.582598	0.358905	-1.62326	0.104533	0.529932	510.142	598.323	678.169	331.449	307.721	552.393
AT1G12830	242.181	1.11342	0.45514	2.44632	0.0144323	0.213845	151.244	199.727	108.483	461.341	245.902	286.388
AT1G12840	3072.26	0.253175	0.237258	1.06709	0.285931	0.757411	2796.79	2735.31	2876.91	4014.71	3308	2701.84
AT1G12845	344.589	0.734986	0.411689	1.78529	0.0742137	0.458349	246.895	157.724	370.902	410.579	425.864	455.572
AT1G12850	570.768	-0.162098	0.34788	-0.465958	0.641246	0.922445	816.717	490.317	501.202	515.09	649.786	451.495
AT1G12855	4.3112	-4.17913	3.81979	-1.09407	0.273923	NA	0	0	24.848	0	0	1.01918
AT1G12860	337.153	-0.153335	0.342763	-0.44735	0.654622	0.924986	402.227	339.45	323.63	271.728	375.035	310.849
AT1G12870	1.09005	-3.20874	3.93766	-0.814885	0.415138	NA	6.54028	0	0	0	0	0
AT1G12880	81.2073	1.54923	0.963475	1.60796	0.107843	0.537168	23.7085	21.4299	78.7863	155.273	12.3638	195.682
AT1G12890	2.25301	1.43265	3.81785	0.37525	0.707475	NA	0	0	3.63629	0	2.74751	7.13423
AT1G12900	23870	-0.567358	0.261617	-2.16865	0.030109	0.300569	28131.4	27916.3	29466.1	16624.7	14888.8	26192.8
AT1G12910	1215.87	-0.280838	0.276191	-1.01683	0.309236	0.776649	1606.46	1190.65	1204.22	1306.39	920.415	1067.08
AT1G12920	1272.19	0.493271	0.348198	1.41664	0.156589	0.618946	1012.11	1152.93	1004.83	2270.87	987.729	1204.67
AT1G12930	195.32	-0.595652	0.45947	-1.29639	0.194842	0.66778	245.26	187.726	272.722	103.018	159.356	203.835
AT1G12935.1	0	NA	NA	NA	NA	NA	0	0	0	0	0	0
AT1G12938	0	NA	NA	NA	NA	NA	0	0	0	0	0	0
AT1G12940	0	NA	NA	NA	NA	NA	0	0	0	0	0	0
AT1G12950	0	NA	NA	NA	NA	NA	0	0	0	0	0	0
AT1G12960	0	NA	NA	NA	NA	NA	0	0	0	0	0	0
AT1G12970	248.96	0.159774	0.441671	0.361749	0.717539	0.945721	196.208	175.725	333.327	301.589	196.447	290.465
AT1G12980	0	NA	NA	NA	NA	NA	0	0	0	0	0	0
AT1G12990	785.052	-0.298015	0.302402	-0.985491	0.324383	0.784598	746.409	809.194	1042.4	559.88	711.605	840.82
AT1G13000	299.874	0.410316	0.395474	1.03753	0.299489	0.768964	247.713	323.163	202.42	285.166	299.478	441.303
AT1G13010	0.169863	1.72814	4.08047	0.423516	0.671919	NA	0	0	0	0	0	1.01918
AT1G13020	141.74	-0.194892	0.577236	-0.337629	0.735643	0.950035	157.784	142.295	153.936	174.683	53.5764	168.164
AT1G13030	58.2242	0.279	0.759751	0.367226	0.713451	0.945313	60.4976	32.5735	64.8472	29.8603	81.0515	80.5149
AT1G13040	2.44567	1.19634	3.8066	0.314279	0.753309	NA	3.27014	0	1.2121	0	0	10.1918
AT1G13050	18.3228	-0.410236	1.52162	-0.269604	0.787465	0.962038	11.4455	26.5731	24.848	13.4371	0	33.6328
AT1G13060	792.707	0.00590165	0.37578	0.0157051	0.98747	0.99841	706.35	649.755	1017.56	770.395	489.057	1123.13
AT1G13070	0.625458	0.338232	4.00582	0.0844352	0.93271	NA	0	1.71439	0	0	0	2.03835
AT1G13080	409.58	-0.40852	0.342029	-1.1944	0.232321	0.707319	511.777	384.881	505.445	309.054	309.095	437.226
AT1G13090	761.663	-0.708278	0.351692	-2.01392	0.0440182	0.36202	990.035	767.191	1078.16	355.337	719.847	659.407
AT1G13100	311.777	-0.889123	0.616772	-1.44158	0.149422	0.610323	335.189	409.74	470.9	74.6507	119.517	460.668
AT1G13110	2315.46	-0.372511	0.356584	-1.04467	0.296177	0.765429	2322.62	2370.15	3146	1031.67	2621.12	2401.18
AT1G13120	254.438	-0.800253	0.512121	-1.56262	0.118141	0.557134	431.658	355.737	183.027	98.5389	225.296	232.372
AT1G13130	0	NA	NA	NA	NA	NA	0	0	0	0	0	0
AT1G13140	23.8242	-0.0593302	2.22339	-0.0266845	0.978711	0.997794	0	27.4303	45.4537	0	70.0615	0
AT1G13145	81.1312	1.09435	0.865212	1.26483	0.205932	0.681655	50.6872	62.5754	41.8174	220.966	93.4153	17.326
AT1G13150	36.3432	2.3569	1.69275	1.39234	0.163818	0.629537	0	26.5731	9.09073	0	122.264	60.1314
AT1G13160	108.973	-0.357203	0.549807	-0.649688	0.515894	0.879645	110.367	126.865	130.3	58.2275	105.779	122.301
AT1G13170	73.9639	0.041931	0.649232	0.0645856	0.948504	0.992263	97.2866	61.7182	59.9988	50.7625	70.0615	103.956
AT1G13180	106.253	-0.0868992	0.810219	-0.107254	0.914587	0.988263	62.9502	143.152	121.816	229.924	48.0814	31.5945
AT1G13190	396.752	-0.0536681	0.486336	-0.110352	0.91213	0.988166	307.393	490.317	415.143	155.273	534.39	477.993
AT1G13195	279.109	0.590649	0.520625	1.1345	0.256585	0.731959	159.419	255.445	253.328	164.231	570.108	272.12
AT1G13200	0.600784	1.75442	4.03097	0.435235	0.663392	NA	0	0.857197	0	0	2.74751	0
AT1G13210	834.662	0.48084	0.473777	1.01491	0.31015	0.776952	291.86	900.914	898.164	636.024	794.03	1486.98
AT1G13220	816.494	0.378889	0.355828	1.06481	0.286961	0.758181	864.134	792.05	473.324	1106.32	1022.07	641.062
AT1G13230	0.505041	-2.12277	3.97202	-0.53443	0.593044	NA	0	0	3.03024	0	0	0
AT1G13240	0.404032	-1.80539	3.98789	-0.452719	0.650751	NA	0	0	2.42419	0	0	0
AT1G13245	1016.06	-0.877024	0.275206	-3.18679	0.00143862	0.0569219	1433.14	1465.81	1049.07	619.601	750.07	778.65
AT1G13250	460.393	-0.92954	0.404534	-2.2978	0.0215731	0.261171	457.002	696.044	659.381	200.064	291.236	458.629
AT1G13260	2151.07	-1.35499	0.269119	-5.0349	4.78e-07	0.000186139	3078.02	3527.36	2673.89	951.049	1515.25	1160.84
AT1G13270	538.43	0.447494	0.441909	1.01264	0.311234	0.777143	473.353	528.033	364.841	1009.28	533.017	322.06
AT1G13280	424.079	-0.335124	0.40575	-0.825936	0.40884	0.832385	585.355	418.312	416.355	213.501	453.339	457.61
AT1G13290	0	NA	NA	NA	NA	NA	0	0	0	0	0	0
AT1G13300	58.4535	-1.77727	1.23704	-1.43671	0.1508	0.612816	128.353	121.722	21.2117	31.3533	48.0814	0
AT1G13310	10.0297	2.16349	3.0392	0.711862	0.47655	0.864021	0	0	10.9089	49.2694	0	0
AT1G13320	837.262	-0.0764216	0.264174	-0.289285	0.772363	0.958287	949.158	891.485	738.167	834.594	741.827	868.338
AT1G13330	69.2091	1.30241	0.863662	1.50801	0.131553	0.581117	42.5118	67.7185	9.69678	167.217	65.9402	62.1697
AT1G13340	1564.97	0.533562	0.481034	1.1092	0.267345	0.738947	767.665	2197.85	871.498	855.497	2823.07	1874.26
AT1G13350	1157.25	0.493436	0.297152	1.66055	0.0968039	0.513666	983.494	1121.21	778.773	1699.05	1309.19	1051.79
AT1G13360	574.173	0.296243	0.495283	0.598129	0.549754	0.891896	452.097	513.461	580.595	262.77	1162.2	473.917
AT1G13370	4.28721	0.326686	3.2379	0.100894	0.919634	NA	0	6.00038	5.45444	0	0	14.2685
AT1G13380	358.629	-0.328214	0.375605	-0.873826	0.382213	0.814956	449.644	413.169	335.751	219.473	339.317	394.421
AT1G13390	1986.12	1.01907	0.298218	3.41719	0.00063272	0.0343096	1188.7	1371.51	1376.34	2835.23	3404.16	1740.75
AT1G13400	0.272512	-1.19867	4.02955	-0.297469	0.766108	NA	1.63507	0	0	0	0	0
AT1G13410	1.43064	1.32308	3.86678	0.342165	0.732227	NA	0	0	2.42419	0	4.12126	2.03835
AT1G13420	24.11	-0.00261115	1.49226	-0.0017498	0.998604	0.999855	10.628	42.8598	18.7875	46.2834	26.1013	0
AT1G13430	24.1857	-0.494126	1.96375	-0.251624	0.801332	0.964956	49.0521	36.0023	0	2.98603	0	57.0739
AT1G13440	11935.6	-0.200622	0.231152	-0.867921	0.385437	0.816998	13746	11085.3	13461.6	11412.6	8985.73	12922.1
AT1G13448	32.5055	0.85934	0.94542	0.90895	0.363376	0.803171	20.4384	12.858	35.7569	53.7485	50.8289	21.4027
AT1G13450	665.094	-0.402058	0.347936	-1.15555	0.247864	0.72368	617.239	736.332	918.77	443.425	484.935	789.861
AT1G13460	224.388	1.09581	0.684996	1.59973	0.109658	0.54113	85.8412	196.298	146.664	522.555	333.822	61.1506
AT1G13470	1.36917	-3.53817	3.93138	-0.899983	0.36813	NA	7.35781	0.857197	0	0	0	0
AT1G13480	0	NA	NA	NA	NA	NA	0	0	0	0	0	0
AT1G13485	0	NA	NA	NA	NA	NA	0	0	0	0	0	0
AT1G13490	0	NA	NA	NA	NA	NA	0	0	0	0	0	0
AT1G13500	0	NA	NA	NA	NA	NA	0	0	0	0	0	0
AT1G13510	0	NA	NA	NA	NA	NA	0	0	0	0	0	0
AT1G13520	34.2492	-8.18544	1.87648	-4.36212	NA	NA	183.945	9.42916	12.121	0	0	0
AT1G13530	19.5431	1.03949	1.6532	0.628773	0.529498	0.883897	1.63507	9.42916	27.2722	0	41.2126	37.7095
AT1G13540	11.9935	-0.594785	2.4969	-0.238209	0.811719	0.967295	23.7085	19.7155	0	0	0	28.5369
AT1G13550	19.3816	0.929289	1.65706	0.560807	0.574929	0.902957	22.0734	18.0011	0	53.7485	4.12126	18.3452
AT1G13560	3154.47	0.483103	0.337539	1.43125	0.152358	0.615089	1558.22	3327.64	3007.82	2666.52	4541.63	3824.97
AT1G13570	290.487	0.67097	0.42131	1.59258	0.111254	0.544891	130.806	254.587	286.661	359.816	377.782	333.271
AT1G13580	145.779	0.158213	0.570087	0.277524	0.781377	0.960582	63.7677	177.44	172.118	116.455	195.073	149.819
AT1G13590	4.42158	-5.23148	3.59556	-1.45498	0.145674	NA	0	22.2871	4.24234	0	0	0
AT1G13600	0	NA	NA	NA	NA	NA	0	0	0	0	0	0
AT1G13605	1.83167	4.72455	3.93807	1.19971	0.230251	NA	0	0	0	0	10.99	0
AT1G13607	0.169863	1.72814	4.08047	0.423516	0.671919	NA	0	0	0	0	0	1.01918
AT1G13608	2.74008	5.30886	3.92767	1.35165	0.176486	NA	0	0	0	0	12.3638	4.0767
AT1G13609	200.463	4.9935	0.791343	6.31015	2.79e-10	4.52e-07	7.35781	5.14318	23.6359	234.403	820.131	112.109
AT1G13610	9.46886	-4.66382	3.10102	-1.50396	0.132591	0.582991	54.7748	0	0	0	0	2.03835
AT1G13620	0.202016	-0.834203	4.06283	-0.205325	0.837318	NA	0	0	1.2121	0	0	0
AT1G13630	9.12468	-6.27786	2.29637	-2.73382	0.00626034	0.134127	8.17535	26.5731	19.9996	0	0	0
AT1G13635	5.45041	0.573481	2.68148	0.213867	0.830651	NA	11.4455	1.71439	0	0	16.4851	3.05753
AT1G13640	527.746	0.535732	0.366742	1.46079	0.144073	0.60229	424.301	416.598	450.9	806.227	692.372	376.076
AT1G13650	1640.72	0.408556	0.335519	1.21768	0.223345	0.698584	1517.34	896.628	1815.72	1357.15	2173.28	2084.21
AT1G13660.1	0	NA	NA	NA	NA	NA	0	0	0	0	0	0
AT1G13670	27.1899	-0.378148	1.68976	-0.223787	0.822923	0.970001	13.0806	70.2901	9.09073	0	1.37375	69.304
AT1G13680	0	NA	NA	NA	NA	NA	0	0	0	0	0	0
AT1G13690	443.463	-0.734434	0.476755	-1.54048	0.123442	0.56736	561.646	487.745	612.715	437.453	125.012	436.207
AT1G13700	702.556	-1.09163	0.346675	-3.14885	0.00163916	0.0619602	938.53	1060.35	869.074	641.996	387.399	317.983
AT1G13710	0.681279	-2.52854	3.95614	-0.639145	0.522729	NA	4.08767	0	0	0	0	0
AT1G13720	0	NA	NA	NA	NA	NA	0	0	0	0	0	0
AT1G13730	179.671	-0.0525342	0.552499	-0.0950848	0.924248	0.989631	239.538	123.436	185.451	289.645	104.405	135.55
AT1G13740	531.431	1.78143	0.492692	3.61572	0.000299516	0.0212798	103.009	195.441	419.386	933.133	598.957	938.661
AT1G13750	79.6564	0.408067	0.768611	0.530915	0.595478	0.910796	107.097	77.1477	21.2117	135.864	67.314	69.304
AT1G13755	0.272512	-1.19867	4.02955	-0.297469	0.766108	NA	1.63507	0	0	0	0	0
AT1G13760	0	NA	NA	NA	NA	NA	0	0	0	0	0	0
AT1G13770	111.761	0.464285	0.769371	0.603461	0.546202	0.890231	117.725	47.1458	116.967	28.3673	211.558	148.8
AT1G13780	42.9932	-0.496441	1.07049	-0.463753	0.642825	0.923048	8.99288	86.5769	55.1504	58.2275	39.8389	9.17258
AT1G13790	37.2179	2.73894	1.27437	2.14925	0.0316145	0.309111	0	23.1443	6.06049	32.8463	83.799	77.4574
AT1G13800	1.66151	-3.81751	3.92706	-0.972103	0.330999	NA	6.54028	3.42879	0	0	0	0
AT1G13810	39.0231	-1.1629	1.32487	-0.877747	0.380081	0.813707	57.2274	30.0019	74.544	0	63.1927	9.17258
AT1G13820	1279.11	0.132729	0.268249	0.494797	0.620743	0.917959	1260.64	1182.93	1216.95	1194.41	1696.59	1123.13
AT1G13830	2.42874	-1.88475	3.8563	-0.488745	0.625022	NA	0	0	11.5149	0	0	3.05753
AT1G13840	0	NA	NA	NA	NA	NA	0	0	0	0	0	0
AT1G13850	1.13821	2.87228	3.96457	0.724487	0.468767	NA	0	0.857197	0	5.97205	0	0
AT1G13860	182.634	0.214434	0.481521	0.445327	0.656083	0.925663	107.097	185.154	215.147	173.19	163.477	251.736
AT1G13870	71.862	-0.86715	1.12227	-0.772677	0.439713	0.845399	111.185	102.006	65.4533	0	93.4153	59.1122
AT1G13880	554.243	0.0423448	0.389953	0.108589	0.913528	0.988166	608.246	528.033	502.414	313.533	791.283	581.949
AT1G13890	1.53848	-3.70589	3.92869	-0.94329	0.345533	NA	4.08767	5.14318	0	0	0	0
AT1G13900	89.9212	-1.0267	0.749647	-1.36957	0.17082	0.640623	75.2132	156.867	130.3	16.4231	65.9402	94.7834
AT1G13910	140.693	-0.461459	0.519487	-0.888298	0.374381	0.809661	174.952	162.01	151.512	167.217	118.143	70.3231
AT1G13920	49.1153	0.94292	1.05416	0.894473	0.371069	0.807809	40.0592	6.00038	54.5444	131.385	17.8588	44.8437
AT1G13930	5567.84	-0.010639	0.243069	-0.0437696	0.965088	0.995523	5708.03	4390.56	6665.93	5031.45	6245.09	5365.96
AT1G13940	93.3939	-0.691235	0.610513	-1.13222	0.257542	0.733156	147.974	113.15	85.4529	46.2834	64.5665	102.937
AT1G13950	276.581	0.567897	0.442652	1.28294	0.199512	0.674404	328.649	146.581	193.33	383.704	263.761	343.462
AT1G13960	374.522	0.287105	0.368819	0.778443	0.436308	0.843892	322.926	325.735	363.023	365.788	561.866	307.791
AT1G13970	37.921	0.559577	0.876442	0.638464	0.523171	0.882423	31.0663	18.8583	41.8174	47.7764	64.5665	23.441
AT1G13980	153.627	-0.363507	0.518624	-0.700907	0.483361	0.867121	222.369	183.44	113.331	88.0878	152.487	162.049
AT1G13990	661.075	-0.284188	0.37259	-0.762737	0.44562	0.848649	669.561	690.901	816.954	450.89	908.052	430.092
AT1G14000	770.029	-0.122438	0.278043	-0.440357	0.659678	0.926414	758.672	706.33	942.406	831.608	675.887	705.27
AT1G14010	429.651	-0.262853	0.397331	-0.661547	0.508262	0.877585	321.291	516.89	568.474	289.645	347.56	534.048
AT1G14020	137.616	-0.224468	0.567609	-0.395462	0.692502	0.938949	211.742	96.8632	136.361	79.1297	181.336	120.263
AT1G14030	634.123	-0.58861	0.438841	-1.34128	0.179829	0.652341	896.018	641.183	749.076	229.924	498.673	789.861
AT1G14040	12.0424	-2.92501	1.89035	-1.54734	0.121782	0.564861	20.4384	14.5723	29.0903	0	0	8.15341
AT1G14048	1.30491	1.87495	3.90447	0.480206	0.631081	NA	0	1.71439	0	0	0	6.11506
AT1G14060	113.458	-0.477789	0.652708	-0.73201	0.464162	0.858364	84.2061	155.153	156.361	116.455	131.88	36.6903
AT1G14070	37.1575	1.33995	0.875268	1.53091	0.125792	0.570683	10.628	21.4299	30.9085	47.7764	71.4352	40.767
AT1G14071	5.32025	1.95672	3.58692	0.545517	0.585398	NA	6.54028	0	0	25.3812	0	0
AT1G14080	1.47477	2.0949	3.8966	0.537624	0.590837	NA	0	1.71439	0	0	0	7.13423
AT1G14090	66.3636	0.857813	0.664875	1.29019	0.196986	0.669791	67.0379	35.1451	39.3932	79.1297	107.153	70.3231
AT1G14100	0	NA	NA	NA	NA	NA	0	0	0	0	0	0
AT1G14110	0	NA	NA	NA	NA	NA	0	0	0	0	0	0
AT1G14120	66.372	-0.289266	0.648457	-0.446083	0.655537	0.925427	49.0521	83.1481	86.665	59.7205	68.6877	50.9588
AT1G14130	236.346	0.110508	0.443316	0.249276	0.803147	0.965144	144.704	212.585	324.236	259.784	232.165	244.602
AT1G14140	521.797	0.651857	0.336861	1.93509	0.0529788	0.394266	365.438	436.313	415.749	509.118	855.849	548.317
AT1G14150	1774.29	-0.211277	0.243179	-0.868812	0.38495	0.816762	1980.07	1590.1	2141.78	1464.65	1748.79	1720.37
AT1G14160	8.00705	1.88187	2.81755	0.667909	0.504191	0.8758	0	10.2864	0	0	35.7176	2.03835
AT1G14170	46.7633	0.588752	0.890335	0.66127	0.508439	0.877585	42.5118	31.7163	37.575	98.5389	54.9502	15.2876
AT1G14180	48.7148	0.532358	0.767937	0.693231	0.488164	0.86921	22.0734	42.8598	54.5444	44.7904	57.6977	70.3231
AT1G14182	2.87459	-4.60986	3.9185	-1.17644	0.239421	NA	15.5332	1.71439	0	0	0	0
AT1G14185	31.0595	-1.09731	1.7014	-0.644942	0.518965	0.880565	20.4384	37.7167	69.0896	0	0	59.1122
AT1G14190	11.0568	2.45591	2.96224	0.829075	0.407062	0.832114	0	10.2864	0	0	0	56.0547
AT1G14200	373.207	-0.397228	0.365945	-1.08549	0.277706	0.749951	470.9	468.887	333.933	273.221	277.498	414.805
AT1G14205	23.9101	-2.22764	1.15966	-1.92094	0.0547388	0.399763	12.263	69.4329	36.3629	13.4371	6.86877	5.09588
AT1G14210	110.271	-1.11196	0.737421	-1.50791	0.131579	0.581117	182.31	100.292	169.088	123.92	68.6877	17.326
AT1G14220	0	NA	NA	NA	NA	NA	0	0	0	0	0	0
AT1G14225	0	NA	NA	NA	NA	NA	0	0	0	0	0	0
AT1G14230	245.052	0.41687	0.374062	1.11444	0.26509	0.737868	210.924	173.154	245.45	273.221	272.003	295.561
AT1G14240	0.136256	-0.19541	4.08047	-0.047889	0.961805	NA	0.817535	0	0	0	0	0
AT1G14250	1238.96	-0.975504	0.409597	-2.38162	0.0172366	0.23205	2334.06	1041.49	1551.48	1282.5	517.905	706.289
AT1G14260	6.12619	-2.59718	2.8752	-0.903303	0.366365	0.804528	18.8033	12.858	0	0	0	5.09588
AT1G14270	1584.17	-0.150405	0.215292	-0.698611	0.484795	0.867853	1634.25	1626.96	1738.75	1469.13	1523.49	1512.46
AT1G14280	1015.48	-0.426025	0.267184	-1.5945	0.110824	0.544629	1220.58	1110.93	1162.4	825.636	722.595	1050.77
AT1G14290	890.341	-0.146746	0.326541	-0.449394	0.653147	0.924652	734.964	1025.21	1046.65	995.84	574.229	965.16
AT1G14300	99.7193	-0.426373	0.618783	-0.689051	0.490791	0.869661	136.528	131.151	75.7561	44.7904	107.153	102.937
AT1G14310	292.357	1.03892	0.561976	1.84869	0.0645027	0.43032	125.083	274.303	174.542	682.307	333.822	164.087
AT1G14315	5.49502	6.31149	3.91721	1.61122	0.107132	0.535853	0	0	0	0	32.9701	0
AT1G14320	13979.4	0.154941	0.229992	0.67368	0.500515	0.87379	14073	13317.4	12297.3	18190.9	12285.5	13712
AT1G14330	484.387	0.240958	0.378582	0.636477	0.524466	0.882697	331.102	520.318	479.991	595.712	638.796	340.405
AT1G14340	178.211	-0.756154	0.510188	-1.48211	0.138311	0.591424	264.064	222.871	185.451	71.6646	134.628	190.586
AT1G14345	1525.89	-0.567195	0.254207	-2.23124	0.0256655	0.282756	1720.09	1866.12	1880.57	1276.53	973.992	1438.06
AT1G14350	93.3556	-0.189291	0.954561	-0.198302	0.842809	0.972898	58.045	117.436	123.028	120.934	4.12126	136.57
AT1G14360	113.065	-0.499322	1.13126	-0.441385	0.658934	0.926414	192.938	54.8606	149.694	101.525	0	179.375
AT1G14370	199.28	-0.296955	0.556626	-0.533491	0.593694	0.910409	235.45	260.588	163.633	198.571	71.4352	266.005
AT1G14380	361.025	-0.343679	0.353064	-0.973418	0.330345	0.787041	467.63	404.597	339.993	252.319	321.459	380.153
AT1G14390	5.83256	-1.2686	2.1546	-0.588786	0.556005	0.894378	10.628	2.57159	11.5149	0	8.24253	2.03835
AT1G14400	1410.1	0.0448658	0.244221	0.18371	0.854241	0.97488	1384.09	1369.8	1411.49	1297.43	1292.7	1705.08
AT1G14410	425.034	0.898733	0.471096	1.90775	0.0564235	0.404344	286.137	224.586	378.78	930.147	421.743	308.81
AT1G14420	0	NA	NA	NA	NA	NA	0	0	0	0	0	0
AT1G14430	34.3264	-2.55456	1.52197	-1.67846	0.0932581	0.505727	62.1326	44.5742	69.6956	0	0	29.5561
AT1G14440	0.136256	-0.19541	4.08047	-0.047889	0.961805	NA	0.817535	0	0	0	0	0
AT1G14450	1407.07	0.838299	0.338881	2.47373	0.0133712	0.204642	1035.82	966.061	1025.43	2406.74	1989.2	1019.18
AT1G14455	0.679451	3.32318	3.98883	0.833122	0.404776	NA	0	0	0	0	0	4.0767
AT1G14460	58.7564	0.543874	0.678541	0.801534	0.422823	0.83794	39.2417	48.8602	55.1504	68.6786	90.6678	49.9396
AT1G14470	0.849313	3.64028	3.9728	0.916302	0.359508	NA	0	0	0	0	0	5.09588
AT1G14480	45.6329	1.25134	1.15237	1.08588	0.27753	0.749951	1.63507	62.5754	16.9694	44.7904	35.7176	112.109
AT1G14490	3.22739	5.55079	3.92445	1.41441	0.157241	NA	0	0	0	0	0	19.3643
AT1G14500	12.2056	-2.77468	2.37765	-1.16699	0.243216	0.719448	36.7891	0	27.2722	0	0	9.17258
AT1G14510	285.533	0.443098	0.436401	1.01535	0.309941	0.776934	250.983	252.873	222.42	192.599	475.319	319.002
AT1G14518	0	NA	NA	NA	NA	NA	0	0	0	0	0	0
AT1G14520	534.286	-0.246875	0.481039	-0.513212	0.607803	0.913567	479.075	602.609	656.957	816.678	454.713	195.682
AT1G14530	173.702	1.80686	0.459616	3.93124	8.45e-05	0.0089898	87.4762	84.0053	60.6049	200.064	274.751	335.309
AT1G14540	258.999	0.896246	0.681633	1.31485	0.18856	0.660633	165.142	153.438	224.238	674.842	63.1927	273.139
AT1G14549	0	NA	NA	NA	NA	NA	0	0	0	0	0	0
AT1G14550	0	NA	NA	NA	NA	NA	0	0	0	0	0	0
AT1G14560	412.276	0.12415	0.313658	0.395812	0.692244	0.938949	392.417	369.452	421.204	465.82	462.955	361.807
AT1G14570	381.559	-0.0659703	0.391066	-0.168693	0.866038	0.977631	427.571	421.741	322.418	338.914	256.892	521.818
AT1G14580	268.128	-0.312302	0.389827	-0.801131	0.423056	0.838085	371.161	227.157	292.722	214.994	277.498	225.238
AT1G14590	95.5035	0.090919	1.141	0.0796839	0.936489	0.990502	59.68	144.009	73.9379	0	173.093	122.301
AT1G14600	89.3086	-0.375609	0.552272	-0.680117	0.49643	0.871393	98.9217	91.72	112.119	62.7066	79.6778	90.7067
AT1G14610	517.902	0.027166	0.302226	0.0898863	0.928378	0.989961	586.172	458.6	493.93	604.67	493.178	470.859
AT1G14620	152.523	-0.498425	1.04845	-0.475394	0.634506	0.921113	169.23	157.724	209.087	0	185.457	193.643
AT1G14630	1.09005	-3.20874	3.93766	-0.814885	0.415138	NA	6.54028	0	0	0	0	0
AT1G14640	25.893	2.40691	1.19828	2.00864	0.0445757	0.363751	3.27014	19.7155	1.81815	47.7764	52.2027	30.5753
AT1G14642	34.5603	-0.449553	0.967837	-0.464493	0.642295	0.922976	53.9573	49.7174	16.3633	16.4231	21.9801	48.9204
AT1G14650	395.501	0.471474	0.360786	1.30679	0.191283	0.663455	396.504	363.451	234.541	537.485	427.238	413.785
AT1G14660	79.3068	0.141494	0.58629	0.241339	0.809293	0.966535	73.5781	64.2898	88.4831	67.1856	82.4253	99.8792
AT1G14670	327.559	-0.358503	0.392397	-0.913623	0.360915	0.801702	324.561	400.311	378.78	264.263	395.641	201.797
AT1G14680	12.9393	-5.79554	2.03805	-2.84367	0.00445974	0.10948	4.08767	29.1447	43.0295	0	1.37375	0
AT1G14685	571.155	0.296622	0.30472	0.973426	0.330341	0.787041	517.5	552.035	469.082	621.094	506.915	760.305
AT1G14686	0.748493	-0.191038	3.96989	-0.0481218	0.961619	NA	2.4526	0	0	0	0	2.03835
AT1G14687	21.7243	-3.14025	1.44398	-2.17472	0.0296513	0.297882	53.9573	53.1462	10.3028	0	2.74751	10.1918
AT1G14688	0.545023	-2.20523	3.96843	-0.555694	0.57842	NA	3.27014	0	0	0	0	0
AT1G14690	248.856	-0.438038	0.496552	-0.88216	0.37769	0.81232	334.372	366.023	159.391	128.399	230.791	274.158
AT1G14700	913.016	-0.731187	0.396283	-1.84512	0.0650207	0.431402	1601.55	668.613	1149.07	438.946	795.404	824.513
AT1G14710	342.933	0.377442	0.366681	1.02935	0.303316	0.771851	237.085	399.454	258.783	370.267	387.399	404.613
AT1G14720	602.33	-0.265085	0.400536	-0.661825	0.508084	0.877585	531.398	728.617	712.107	398.635	864.092	379.133
AT1G14730	23.5491	-0.594141	2.14202	-0.277374	NA	NA	80.9359	3.42879	0.606049	0	56.3239	0
AT1G14740	572.208	0.191047	0.392587	0.486635	0.626517	0.920015	451.279	553.749	597.564	918.203	372.287	540.163
AT1G14750	0.509588	2.91579	4.01518	0.72619	0.467722	NA	0	0	0	0	0	3.05753
AT1G14755	0	NA	NA	NA	NA	NA	0	0	0	0	0	0
AT1G14760	6.85758	2.01426	3.34551	0.602078	0.547123	0.89091	8.17535	0	0	0	32.9701	0
AT1G14770	98.5916	-0.239329	0.529499	-0.451991	0.651276	0.924121	114.455	119.15	86.665	88.0878	101.658	81.5341
AT1G14780	43.6895	0.290573	0.941974	0.308473	0.757723	0.954069	44.1469	59.1466	14.5452	76.1437	50.8289	17.326
AT1G14790	63.9028	-0.403391	1.42217	-0.283645	0.776682	0.959743	39.2417	70.2901	109.089	0	2.74751	162.049
AT1G14800	0	NA	NA	NA	NA	NA	0	0	0	0	0	0
AT1G14810	386.369	0.402834	0.399068	1.00944	0.312766	0.778179	451.279	297.447	250.298	312.04	458.834	548.317
AT1G14820	436.006	0.328736	0.408923	0.803908	0.42145	0.837743	553.471	318.02	287.873	558.387	570.108	328.175
AT1G14830	612.684	0.362038	0.299407	1.20918	0.226592	0.703184	569.822	578.608	459.991	827.129	648.412	592.141
AT1G14840	212.453	0.0460079	0.46074	0.0998567	0.920458	0.989156	178.223	258.016	191.511	131.385	240.407	275.177
AT1G14850	62.1918	-1.38634	0.785511	-1.76489	0.0775821	0.465852	102.192	91.72	76.3621	35.8323	10.99	56.0547
AT1G14860	60.5465	-1.23775	1.12944	-1.09589	0.273127	0.745027	91.5639	93.4344	70.3017	44.7904	0	63.1889
AT1G14870	447.723	-0.0495332	0.471245	-0.105111	0.916287	0.988704	319.656	462.029	583.625	742.028	324.206	254.794
AT1G14880	0	NA	NA	NA	NA	NA	0	0	0	0	0	0
AT1G14890	338.86	-1.50228	0.615556	-2.44053	0.0146658	0.216182	349.905	690.043	461.809	325.477	162.103	43.8246
AT1G14900	62.9663	-1.98852	0.780415	-2.54802	0.0108335	0.181964	161.872	43.717	96.3617	16.4231	28.8488	30.5753
AT1G14910	161.881	-0.381834	0.453987	-0.841068	0.40031	0.827361	178.223	172.297	198.784	180.655	105.779	135.55
AT1G14920	281.019	-0.258378	0.513347	-0.50332	0.614739	0.916465	235.45	220.3	463.021	186.627	168.972	411.747
AT1G14930	4.08767	-5.11829	3.91502	-1.30735	0.191095	NA	24.526	0	0	0	0	0
AT1G14940	0	NA	NA	NA	NA	NA	0	0	0	0	0	0
AT1G14950	0	NA	NA	NA	NA	NA	0	0	0	0	0	0
AT1G14960	0	NA	NA	NA	NA	NA	0	0	0	0	0	0
AT1G14970	54.1342	-0.278889	1.25332	-0.22252	0.823909	0.970055	98.9217	39.431	39.9992	0	34.3439	112.109
AT1G14980	1552.03	0.498554	0.370079	1.34715	0.17793	0.649254	1541.87	1255.79	1061.19	2871.06	1443.82	1138.42
AT1G14990	142.889	-0.330419	0.703963	-0.46937	0.638805	0.921997	103.009	167.153	207.269	38.8183	251.397	89.6875
AT1G15000	245.622	-1.14584	0.541495	-2.11607	0.0343389	0.323874	371.978	246.873	396.962	59.7205	160.729	237.468
AT1G15002	11.4813	-1.36658	1.41298	-0.967159	0.333465	0.789151	13.0806	12.858	23.6359	10.4511	2.74751	6.11506
AT1G15010	6303.18	-0.0799917	0.294831	-0.271314	0.78615	0.961962	4835.72	8229.95	6367.15	8078.7	5495.02	4812.55
AT1G15015	60.4694	0.192558	0.96186	0.200193	0.84133	0.972565	102.192	53.1462	13.9391	128.399	23.3538	41.7862
AT1G15020	253.272	0.106643	0.373121	0.285813	0.775021	0.959348	235.45	287.161	209.087	291.138	262.387	234.41
AT1G15030	458.091	-0.741026	0.441758	-1.67745	0.0934549	0.505929	681.006	422.598	616.958	294.124	193.699	540.163
AT1G15040	525.835	-0.589546	0.540359	-1.09103	0.275262	0.747665	695.722	797.193	401.81	586.754	552.249	121.282
AT1G15045	0	NA	NA	NA	NA	NA	0	0	0	0	0	0
AT1G15050	32.9809	-2.43062	1.54709	-1.57109	0.116162	0.553434	38.4241	63.4326	65.4533	0	0	30.5753
AT1G15060	310.851	-0.457556	0.48344	-0.946458	0.343915	0.793318	431.658	270.874	377.568	179.162	167.598	438.246
AT1G15080	76.6154	-1.91931	1.06883	-1.79571	0.0725408	0.453339	70.308	140.58	152.724	52.2555	0	43.8246
AT1G15090	0	NA	NA	NA	NA	NA	0	0	0	0	0	0
AT1G15100	1113.18	1.15298	0.35657	3.23355	0.00122264	0.0520813	410.402	757.762	903.013	1951.37	1246	1410.54
AT1G15110	54.7504	-1.88804	1.16764	-1.61697	0.105884	0.532927	144.704	35.1451	78.7863	40.3114	0	29.5561
AT1G15120	751.796	0.346658	0.307556	1.12714	0.259684	0.734661	612.334	588.894	784.833	749.493	706.11	1069.12
AT1G15125	9.47456	-0.893858	1.77666	-0.503111	0.614886	0.916468	13.0806	15.4295	8.48468	0	13.7375	6.11506
AT1G15130	720.199	0.127462	0.381046	0.334505	0.737999	0.950173	739.869	786.907	539.383	415.058	881.95	958.025
AT1G15140	1062.29	0.250207	0.2706	0.92464	0.355153	0.798267	1196.87	859.768	855.135	1058.55	1149.83	1253.59
AT1G15150	3.08059	0.625749	3.7855	0.165302	0.868707	NA	0	0	7.27258	0	0	11.2109
AT1G15160	99.7868	1.53885	0.660148	2.33107	0.0197498	0.249144	80.1184	22.2871	50.9081	158.259	101.658	185.49
AT1G15165	54.417	-0.315179	0.730695	-0.431341	0.66622	0.928684	40.8767	81.4337	58.7867	56.7345	31.5964	57.0739
AT1G15170	151.942	-0.257785	0.454095	-0.56769	0.570245	0.901857	183.128	129.437	183.633	158.259	127.759	129.435
AT1G15175	110.264	0.40767	0.662025	0.615792	0.538032	0.887765	91.5639	150.009	43.0295	82.1157	186.831	108.033
AT1G15180	486.393	-0.249456	0.477306	-0.522634	0.601229	0.911892	588.625	600.038	396.356	688.279	181.336	463.725
AT1G15190	87.9772	1.5924	0.630388	2.52607	0.0115348	0.190133	26.9786	52.289	52.1202	164.231	82.4253	149.819
AT1G15200	1761.83	0.885725	0.298822	2.96406	0.00303611	0.0902352	1617.9	1026.06	1067.86	2447.05	2677.45	1734.64
AT1G15210	0	NA	NA	NA	NA	NA	0	0	0	0	0	0
AT1G15215	123.524	-0.3555	0.512483	-0.693682	0.487882	0.869143	140.616	104.578	170.906	106.004	86.5465	132.493
AT1G15220	137.18	-0.554763	0.607827	-0.912699	0.361401	0.801839	153.697	128.58	207.269	55.2415	193.699	84.5916
AT1G15230	613.76	0.958344	0.428057	2.23882	0.0251673	0.280257	321.291	438.885	490.293	1204.86	829.748	397.479
AT1G15240	693.176	0.364451	0.280313	1.30016	0.193547	0.666439	707.985	564.035	546.05	858.483	780.293	702.212
AT1G15250	238.703	0.0448393	0.427378	0.104917	0.916442	0.988704	228.092	243.444	233.329	325.477	155.234	246.641
AT1G15260	892.173	-0.497043	0.336188	-1.47847	0.139283	0.593545	1141.28	951.488	1041.19	745.014	471.198	1002.87
AT1G15270	1922.47	0.407486	0.262921	1.54984	0.12118	0.563995	1586.02	1518.95	1852.08	2665.03	2211.74	1701
AT1G15280	717.617	0.347719	0.273293	1.27233	0.203256	0.678355	685.094	602.609	606.655	792.79	920.415	698.135
AT1G15290	794.862	-0.545385	0.344998	-1.58083	0.113916	0.549326	1353.02	810.908	666.048	659.912	711.605	567.681
AT1G15300.1	22.392	0.151616	2.02444	0.0748927	0.9403	0.990933	51.5047	0	12.121	0	68.6877	2.03835
AT1G15310	6.10987	-0.292566	2.97923	-0.0982017	0.921772	0.989318	0	17.1439	3.03024	0	16.4851	0
AT1G15320	0	NA	NA	NA	NA	NA	0	0	0	0	0	0
AT1G15330	0.136256	-0.19541	4.08047	-0.047889	0.961805	NA	0.817535	0	0	0	0	0
AT1G15340	1496.22	0.416512	0.333784	1.24785	0.212086	0.687503	1174.8	1157.22	1512.09	2533.64	1321.55	1278.05
AT1G15350	742.843	0.594199	0.320269	1.85531	0.0635514	0.427934	519.952	527.176	727.865	1149.62	811.889	720.557
AT1G15360	0	NA	NA	NA	NA	NA	0	0	0	0	0	0
AT1G15370	1561.26	0.691837	0.318806	2.17008	0.0300005	0.300569	1196.05	1220.65	1164.22	2726.24	1803.74	1256.64
AT1G15380	54.4757	-0.580078	1.24138	-0.467286	0.640295	0.922283	80.1184	54.8606	60.6049	95.5529	35.7176	0
AT1G15385	0	NA	NA	NA	NA	NA	0	0	0	0	0	0
AT1G15390	867.793	0.71548	0.337209	2.12177	0.033857	0.32104	569.004	666.899	733.925	1512.42	979.487	745.018
AT1G15400	1137.05	0.244944	0.280135	0.874379	0.381912	0.814759	934.442	877.769	1309.07	1266.08	1362.76	1072.17
AT1G15405	8.77991	-0.781983	1.80703	-0.432746	0.665199	0.928684	13.0806	18.0011	2.42419	1.49301	1.37375	16.3068
AT1G15410	213.308	-0.988766	0.659407	-1.49948	0.13375	0.585629	309.846	220.3	321.812	67.1856	54.9502	305.753
AT1G15415	7.55648	0.2436	1.75598	0.138726	0.889667	0.983515	3.27014	1.71439	15.7573	4.47904	6.86877	13.2493
AT1G15420	302.38	0.76785	0.461334	1.66441	0.0960299	0.512321	116.09	234.872	319.994	427.002	299.478	416.843
AT1G15430	928.033	-0.106594	0.318657	-0.334509	0.737996	0.950173	734.964	1214.65	938.163	794.283	752.817	1133.32
AT1G15440	61.0688	-0.965029	1.15657	-0.834387	0.404063	0.830442	115.272	59.1466	67.8775	73.1577	0	50.9588
AT1G15450	0	NA	NA	NA	NA	NA	0	0	0	0	0	0
AT1G15460	12.238	0.924562	2.34048	0.395031	0.69282	0.938949	25.3436	0	0	4.47904	42.5864	1.01918
AT1G15470	245.725	-0.116546	0.375302	-0.31054	0.75615	0.954069	282.049	220.3	264.843	222.459	211.558	273.139
AT1G15480	26.1013	-0.453786	1.35116	-0.33585	0.736984	0.950035	32.7014	34.2879	23.6359	0	38.4651	27.5177
AT1G15490	114.881	0.458702	0.795789	0.576411	0.564337	0.898902	34.3365	123.436	132.725	123.92	34.3439	240.526
AT1G15500	931.887	-0.452929	0.348152	-1.30095	0.193275	0.666253	1361.2	1116.93	752.712	1046.6	581.098	732.787
AT1G15510	25.5223	-4.06357	1.50284	-2.70392	0.00685266	0.14143	48.2346	42.0026	53.9383	8.95808	0	0
AT1G15520	76.3019	0.174216	0.77371	0.225169	0.821848	0.970001	70.308	43.717	100.604	141.836	72.809	28.5369
AT1G15530	17.3903	-0.512072	1.92833	-0.265552	0.790584	0.962481	19.6208	33.4307	8.48468	0	0	42.8054
AT1G15540	1.57153	-3.73584	3.92824	-0.951022	0.341593	NA	0	9.42916	0	0	0	0
AT1G15550	32.5455	0.296345	1.39292	0.212751	0.831521	0.971293	46.5995	41.1454	0	31.3533	38.4651	37.7095
AT1G15560.1	0	NA	NA	NA	NA	NA	0	0	0	0	0	0
AT1G15570	52.8354	0.474068	0.971046	0.488204	0.625405	0.919679	35.9715	49.7174	47.2718	7.46507	56.3239	120.263
AT1G15580	286.61	1.3704	0.400777	3.41936	0.000627691	0.0342276	138.981	215.156	126.058	341.9	409.379	488.185
AT1G15590	0.136256	-0.19541	4.08047	-0.047889	0.961805	NA	0.817535	0	0	0	0	0
AT1G15600	0	NA	NA	NA	NA	NA	0	0	0	0	0	0
AT1G15610	0	NA	NA	NA	NA	NA	0	0	0	0	0	0
AT1G15620	0	NA	NA	NA	NA	NA	0	0	0	0	0	0
AT1G15630	0	NA	NA	NA	NA	NA	0	0	0	0	0	0
AT1G15640	0	NA	NA	NA	NA	NA	0	0	0	0	0	0
AT1G15650	0	NA	NA	NA	NA	NA	0	0	0	0	0	0
AT1G15660	36.4668	-2.37231	1.19932	-1.97805	0.047923	0.375285	104.644	42.0026	36.969	0	17.8588	17.326
AT1G15670	206.286	-0.317	0.560008	-0.566062	0.571351	0.901884	179.04	294.876	212.723	83.6087	314.59	152.876
AT1G15680	0	NA	NA	NA	NA	NA	0	0	0	0	0	0
AT1G15690	4298.35	-0.569659	0.201647	-2.82503	0.00472765	0.113921	5244.49	5390.05	4773.85	3704.17	3229.7	3447.87
AT1G15700	105.926	-1.91918	0.786915	-2.43887	0.0147334	0.21648	188.033	179.154	136.361	19.4092	13.7375	98.8601
AT1G15710	228.352	-0.24729	0.406705	-0.608034	0.543165	0.888853	214.194	228.872	299.994	259.784	190.952	176.317
AT1G15720	45.6284	-0.84816	0.937873	-0.904344	0.365813	0.804132	113.637	21.4299	41.2113	23.8882	20.6063	52.9971
AT1G15730	922.044	-0.626945	0.282487	-2.21938	0.026461	0.286334	1008.02	1073.21	1276.34	851.018	575.603	748.075
AT1G15740	1264.1	-0.453136	0.389085	-1.16462	0.244173	0.720927	1303.15	1386.09	1695.12	646.475	792.656	1761.14
AT1G15750	402.227	-0.155133	0.36779	-0.421798	0.673172	0.931257	394.869	540.034	336.357	483.736	343.439	314.925
AT1G15757	0	NA	NA	NA	NA	NA	0	0	0	0	0	0
AT1G15760	0.679451	3.32318	3.98883	0.833122	0.404776	NA	0	0	0	0	0	4.0767
AT1G15770	0.953791	-3.01558	3.94207	-0.764976	0.444286	NA	5.72274	0	0	0	0	0
AT1G15772	3.27014	-4.79612	3.91708	-1.22441	0.220797	NA	19.6208	0	0	0	0	0
AT1G15780	86.1667	-0.373986	0.618744	-0.604428	0.545559	0.889787	70.308	130.294	91.5134	73.1577	50.8289	100.898
AT1G15790	90.1075	0.731086	0.733077	0.997284	0.318626	0.781098	90.7464	43.717	68.4835	214.994	68.6877	54.0163
AT1G15800	253.688	-0.057794	0.370331	-0.156061	0.875985	0.980002	221.552	264.017	290.903	232.91	229.417	283.331
AT1G15810	355.036	-0.696791	0.536287	-1.29929	0.193845	0.666789	461.907	432.884	423.022	82.1157	428.611	301.676
AT1G15820	170001	0.222176	0.250963	0.885297	0.375997	0.8105	176784	134297	159730	231589	141637	175972
AT1G15825	1.63507	-3.7949	3.92738	-0.966269	0.333909	NA	9.81042	0	0	0	0	0
AT1G15830	9.97332	1.77329	2.66914	0.664367	0.506455	0.876776	3.27014	10.2864	0	46.2834	0	0
AT1G15840	0.933639	-2.99189	3.94265	-0.758854	0.44794	NA	0	2.57159	3.03024	0	0	0
AT1G15850	0	NA	NA	NA	NA	NA	0	0	0	0	0	0
AT1G15860	534.79	-0.352338	0.309403	-1.13877	0.254801	0.729979	521.587	656.613	621.2	388.183	560.492	460.668
AT1G15870	18.0579	-1.11086	1.44084	-0.770985	0.440716	0.846263	28.6137	23.1443	22.4238	0	17.8588	16.3068
AT1G15880	1380.93	-0.0910754	0.323999	-0.281097	0.778636	0.960007	1440.5	1544.67	1289.67	839.073	1350.4	1821.27
AT1G15885	240.049	1.39218	0.643828	2.16236	0.0305907	0.303213	240.355	99.4348	57.5746	498.666	410.753	133.512
AT1G15890	253.286	-0.137814	0.535122	-0.257538	0.796763	0.964345	356.445	267.445	172.724	280.687	103.032	339.386
AT1G15900	51.5183	-0.110444	0.916389	-0.12052	0.904071	0.98702	39.2417	40.2882	81.2105	13.4371	37.0914	97.8409
AT1G15910	215.868	0.992964	0.476792	2.08259	0.0372882	0.335803	138.163	162.01	132.725	449.397	201.942	210.969
AT1G15920	500.718	0.806678	0.372295	2.16677	0.0302525	0.30122	354.81	288.018	449.082	746.507	750.07	415.824
AT1G15930	3231.55	-0.160844	0.256006	-0.628281	0.52982	0.883897	4028.81	3206.77	2998.73	3717.6	2487.87	2949.5
AT1G15940	183.666	0.634952	0.5811	1.09267	0.274537	0.746595	187.215	113.15	130.907	403.114	148.365	119.244
AT1G15950	390.499	-1.70484	0.485792	-3.50939	0.000449128	0.028295	594.348	583.751	616.352	88.0878	137.375	323.079
AT1G15960	9.13017	-0.291401	1.98289	-0.146958	0.883165	0.981287	0.817535	11.1436	18.1815	0	16.4851	8.15341
AT1G15970	374.878	0.0875893	0.345188	0.253743	0.799694	0.964596	361.35	334.307	395.144	288.152	434.106	436.207
AT1G15980	749.741	-0.495234	0.27356	-1.81033	0.0702444	0.448051	923.814	796.336	910.891	592.726	725.342	549.336
AT1G15990	8.90402	-1.73228	2.66732	-0.649445	0.516051	0.879658	34.3365	6.85757	0	0	0	12.2301
AT1G16000	292.869	1.05125	0.516358	2.0359	0.0417608	0.353073	181.493	134.58	255.147	588.247	424.49	173.26
AT1G16010	644.096	-0.33068	0.327073	-1.01103	0.312002	0.777481	736.599	714.045	703.017	549.429	405.258	756.229
AT1G16020	274.04	-0.348723	0.467271	-0.746298	0.455487	0.853293	412.855	300.019	207.875	229.924	340.691	152.876
AT1G16022	0	NA	NA	NA	NA	NA	0	0	0	0	0	0
AT1G16025	0	NA	NA	NA	NA	NA	0	0	0	0	0	0
AT1G16030	63.5205	1.10934	0.885024	1.25346	0.210039	0.6852	40.0592	28.2875	52.1202	183.641	21.9801	55.0355
AT1G16040	415.756	0.519034	0.350877	1.47925	0.139074	0.593199	383.424	294.876	346.66	440.439	638.796	390.344
AT1G16060	50.3438	-2.09449	1.17091	-1.78877	0.0736512	0.456468	152.061	40.2882	52.7262	0	23.3538	33.6328
AT1G16070	4.62634	-5.2988	3.50043	-1.51376	0.130087	NA	0	12.0008	15.7573	0	0	0
AT1G16080	1762.81	0.213617	0.251747	0.848539	0.396138	0.823802	1693.93	1417.8	1784.81	2048.41	2094.98	1536.92
AT1G16090	104.885	0.236436	0.733959	0.322138	0.747348	0.95275	138.163	92.5772	58.7867	49.2694	67.314	223.2
AT1G16100	0	NA	NA	NA	NA	NA	0	0	0	0	0	0
AT1G16110	940.097	-0.545781	0.292144	-1.86819	0.0617356	0.423156	1402.07	1042.35	903.619	795.776	653.907	842.858
AT1G16120	16.2289	-0.221945	2.34458	-0.0946633	0.924582	0.989631	0	28.2875	24.2419	0	0	44.8437
AT1G16130	567.751	-0.316177	0.319523	-0.989527	0.322405	0.783471	569.004	678.043	643.018	431.481	428.611	656.349
AT1G16140	14.7541	1.00807	2.1164	0.476316	0.633849	0.920969	0	6.85757	22.4238	53.7485	5.49502	0
AT1G16150	41.5246	-0.878469	1.2539	-0.700588	0.48356	0.867121	89.9288	39.431	32.1206	41.8044	0	45.8629
AT1G16160	1.41411	-3.59556	3.93042	-0.914803	0.360295	NA	0	0	8.48468	0	0	0
AT1G16170	895.11	-0.170538	0.279427	-0.610311	0.541656	0.888399	944.253	825.48	1073.92	709.181	1001.47	816.36
AT1G16180	2884.26	-0.361002	0.289739	-1.24595	0.212781	0.687988	2912.06	3011.33	3807.2	1699.05	2769.49	3106.45
AT1G16190	256.99	0.307874	0.45548	0.675933	0.499083	0.87272	168.412	224.586	296.358	213.501	225.296	413.785
AT1G16210	1014.51	-0.384016	0.304857	-1.25966	0.207792	0.683878	1300.7	1113.5	1033.31	640.503	858.597	1140.46
AT1G16220	105.078	0.739125	0.615621	1.20062	0.2299	0.706234	89.1113	50.5746	96.3617	180.655	70.0615	143.704
AT1G16225	0	NA	NA	NA	NA	NA	0	0	0	0	0	0
AT1G16230	11.8322	3.04846	2.42357	1.25784	0.20845	0.683926	0	7.71477	0	38.8183	0	24.4602
AT1G16240	1849.72	0.18794	0.337588	0.556714	0.577723	0.904321	1362.83	1845.54	1979.96	1197.4	2728.28	1984.34
AT1G16250	133.535	-0.687403	0.648154	-1.06056	0.288892	0.76035	226.457	162.867	104.846	59.7205	188.204	59.1122
AT1G16260	499.166	0.0694213	0.364976	0.190208	0.849146	0.973709	413.673	516.032	532.111	558.387	325.58	649.215
AT1G16270	154.015	-0.590131	0.552989	-1.06716	0.285898	0.757411	260.794	121.722	172.724	79.1297	182.709	107.013
AT1G16280	86.5609	0.467153	0.589377	0.792622	0.427998	0.840367	50.6872	80.5765	86.665	80.6227	125.012	95.8025
AT1G16290	1.3589	4.31072	3.9484	1.09176	0.274938	NA	0	0	0	0	0	8.15341
AT1G16300	105.047	-0.223204	0.647228	-0.344861	0.730199	0.949518	165.96	63.4326	109.695	149.301	83.799	58.093
AT1G16310	0.545023	-2.20523	3.96843	-0.555694	0.57842	NA	3.27014	0	0	0	0	0
AT1G16320	1270.53	-0.41085	0.249618	-1.64591	0.0997823	0.519653	1443.77	1567.81	1338.76	1057.05	1267.98	947.834
AT1G16330	6.41355	-0.908232	2.38731	-0.380441	0.703618	0.942175	8.17535	8.57197	8.48468	0	0	13.2493
AT1G16340	71.2805	0.0241336	0.723242	0.0333686	0.973381	0.997253	107.915	52.289	52.1202	34.3393	89.294	91.7258
AT1G16350	294.559	-0.876626	0.382428	-2.29226	0.0218905	0.263051	378.519	467.172	298.782	231.417	166.224	225.238
AT1G16360	160.113	1.99542	0.669083	2.98231	0.00286081	0.0877029	24.526	113.15	55.1504	122.427	372.287	273.139
AT1G16370	2005.41	0.327755	0.443137	0.739625	0.459528	0.855811	1018.65	2551.02	1766.63	957.022	3033.25	2705.91
AT1G16380	48.9544	0.253979	0.90757	0.279845	0.779596	0.960343	72.7606	40.2882	21.2117	16.4231	64.5665	78.4765
AT1G16390	194.733	-0.29149	0.625885	-0.465724	0.641413	0.922445	160.237	270.874	212.723	88.0878	87.9203	348.558
AT1G16400	52.9926	0.633407	0.806753	0.785132	0.432376	0.842233	42.5118	18.8583	63.0291	92.5668	39.8389	61.1506
AT1G16410	1445.83	-0.97769	0.427658	-2.28615	0.0222455	0.265189	2883.45	826.338	2044.2	685.293	1001.47	1234.22
AT1G16420	46.08	1.16407	1.74181	0.66831	0.503936	0.8758	71.9431	0	13.3331	165.724	0	25.4794
AT1G16430	163.008	1.58579	0.462433	3.42923	0.000605286	0.0332856	67.8554	89.1485	87.271	210.515	321.459	201.797
AT1G16440	2.15422	2.74148	3.87927	0.7067	0.479753	NA	0	1.71439	0	0	0	11.2109
AT1G16445	25.6706	-4.50743	1.58234	-2.84857	0.00439156	0.109195	76.8483	62.5754	8.48468	0	0	6.11506
AT1G16450	0	NA	NA	NA	NA	NA	0	0	0	0	0	0
AT1G16460	1477.54	-0.284487	0.238567	-1.19248	0.233073	0.708197	1759.33	1410.09	1698.15	1458.67	1311.94	1227.09
AT1G16470	397.477	-0.367319	0.366216	-1.00301	0.315855	0.779952	612.334	334.307	396.962	350.858	321.459	368.942
AT1G16480	18.069	0.309006	1.5672	0.197171	0.843694	0.973112	18.8033	7.71477	21.8178	44.7904	0	15.2876
AT1G16489	0	NA	NA	NA	NA	NA	0	0	0	0	0	0
AT1G16490	34.7871	1.99437	0.855922	2.33008	0.0198019	0.249345	17.1682	12.0008	12.727	40.3114	75.5565	50.9588
AT1G16500	33.8643	-1.43542	1.70434	-0.842215	0.399668	0.826728	15.5332	45.4314	87.271	0	54.9502	0
AT1G16510	135.708	-0.640338	0.679379	-0.942534	0.345919	0.793318	136.528	130.294	228.48	201.557	79.6778	37.7095
AT1G16515	25.5995	2.13371	1.60233	1.33163	0.182982	0.654808	18.8033	8.57197	1.2121	0	93.4153	31.5945
AT1G16520	35.8985	-0.376832	1.05249	-0.358037	0.720316	0.946054	7.35781	30.0019	84.2408	31.3533	24.7276	37.7095
AT1G16530	7.97816	1.18255	2.38839	0.495125	0.620512	0.917937	0	4.28598	10.3028	0	30.2226	3.05753
AT1G16540	117.03	-0.0123867	0.536749	-0.0230773	0.981589	0.997794	150.426	87.4341	114.543	153.78	92.0415	103.956
AT1G16550	14.9115	-1.73733	1.7866	-0.972422	0.330841	0.787378	58.045	8.57197	2.42419	0	4.12126	16.3068
AT1G16560	384.816	-0.868786	0.354689	-2.44943	0.0143082	0.212986	493.791	444.028	553.929	332.942	197.821	286.388
AT1G16570	104.405	-1.47025	0.58393	-2.51786	0.0118071	0.192665	131.623	157.724	171.512	46.2834	35.7176	83.5724
AT1G16590	49.3886	-0.681037	1.05612	-0.644851	0.519024	0.880565	80.9359	89.1485	12.727	5.97205	49.4552	58.093
AT1G16600	0	NA	NA	NA	NA	NA	0	0	0	0	0	0
AT1G16610	793.248	0.0746746	0.273146	0.273387	0.784555	0.96155	717.796	814.337	785.439	971.952	751.444	718.519
AT1G16620.1	0.746507	3.41476	3.98384	0.857154	0.39136	NA	0	0	0	4.47904	0	0
AT1G16630	5.83509	2.42879	3.44726	0.704557	0.481086	0.865803	0	0	5.45444	0	0	29.5561
AT1G16635	34.73	1.30639	1.33565	0.978094	0.328028	0.785653	25.3436	17.1439	17.5754	0	81.0515	67.2656
AT1G16640	14.5202	1.48832	2.0371	0.730606	0.46502	0.858387	0	3.42879	19.3936	0	39.8389	24.4602
AT1G16650	244.426	1.06973	0.41596	2.57172	0.0101194	0.17464	156.967	138.866	176.966	322.491	436.854	234.41
AT1G16660.1	1.37375	4.30853	3.94847	1.09119	0.275189	NA	0	0	0	0	8.24253	0
AT1G16670	344.694	0.984749	0.372546	2.6433	0.00821032	0.153856	167.595	238.301	287.873	444.918	533.017	396.459
AT1G16680	86.3866	0.00541132	1.01741	0.0053187	0.995756	0.999236	46.5995	107.15	104.846	164.231	2.74751	92.745
AT1G16690	139.492	-0.0583398	0.687811	-0.0848195	0.932405	0.990502	243.625	132.865	50.302	209.022	127.759	73.3807
AT1G16700	904.595	0.195295	0.296175	0.659389	0.509646	0.878739	624.597	884.627	1020.59	939.105	1081.14	877.51
AT1G16705	20.8596	-0.488925	1.51995	-0.321672	0.747701	0.95275	49.8696	15.4295	7.87863	0	31.5964	20.3835
AT1G16710	161.107	-0.123267	0.59708	-0.20645	0.836439	0.972421	198.661	218.585	86.665	125.413	248.65	88.6683
AT1G16720	1376.17	-0.956978	0.266237	-3.59446	0.000325061	0.0225999	1807.57	1840.4	1802.99	880.878	750.07	1175.11
AT1G16730	232.545	-0.441127	0.47388	-0.930883	0.351914	0.796392	386.694	200.584	215.753	238.882	223.922	129.435
AT1G16740	645.022	0.408968	0.366467	1.11597	0.264434	0.737603	559.194	528.033	574.534	1089.9	637.422	481.051
AT1G16750	106.69	-0.600484	1.16936	-0.513516	0.60759	0.913567	153.697	114.864	117.573	32.8463	0	221.161
AT1G16760	1.88426	-2.89994	3.92645	-0.738567	0.46017	NA	0	10.2864	0	0	0	1.01918
AT1G16770	7.13455	6.68951	3.01933	2.21556	0.0267216	0.287036	0	0	0	0	31.5964	11.2109
AT1G16780	171.418	-1.47305	0.830124	-1.77449	0.0759816	0.462301	427.571	199.727	129.694	13.4371	52.2027	205.874
AT1G16790	57.5042	0.366918	0.785048	0.467384	0.640225	0.922283	60.4976	50.5746	39.3932	108.99	59.0714	26.4986
AT1G16800	24.2697	0.830433	1.15462	0.719227	0.472001	0.86258	22.891	5.14318	24.2419	22.3952	57.6977	13.2493
AT1G16810	900.709	0.188181	0.268296	0.701393	0.483058	0.867019	939.347	783.478	803.015	1130.21	846.233	901.971
AT1G16820	201.187	0.518476	0.514112	1.00849	0.31322	0.77842	196.208	197.155	103.028	176.176	361.297	173.26
AT1G16825	169.647	0.115886	0.533229	0.217329	0.827952	0.971074	185.58	129.437	173.936	86.5948	189.578	252.756
AT1G16830	6.02963	-1.34924	2.53478	-0.532292	0.594524	0.910669	10.628	15.4295	0	2.98603	0	7.13423
AT1G16840	664.761	-0.0138496	0.336257	-0.0411876	0.967146	0.995901	536.303	802.336	666.048	477.764	670.392	835.724
AT1G16850	430.005	1.88194	0.348642	5.39791	6.74e-08	3.55e-05	139.798	227.157	183.633	647.968	799.525	581.949
AT1G16858	0	NA	NA	NA	NA	NA	0	0	0	0	0	0
AT1G16860	0	NA	NA	NA	NA	NA	0	0	0	0	0	0
AT1G16870	278.339	0.695234	0.499354	1.39227	0.163842	0.629537	215.012	266.588	155.755	562.866	280.246	189.567
AT1G16880	8533.45	-0.5867	0.265501	-2.20979	0.0271198	0.2896	10971.3	9754.9	10010.7	5863.06	5338.41	9262.27
AT1G16890	2927.8	0.377596	0.240154	1.5723	0.11588	0.553037	2098.61	2750.74	2790.25	3763.89	3266.79	2896.5
AT1G16900	114.883	-0.388187	0.885454	-0.438405	0.661093	0.92693	94.0165	209.156	87.8771	7.46507	155.234	135.55
AT1G16905	0	NA	NA	NA	NA	NA	0	0	0	0	0	0
AT1G16910	0.142866	-0.19541	4.08047	-0.047889	0.961805	NA	0	0.857197	0	0	0	0
AT1G16916	275.704	1.79242	0.595843	3.00822	0.00262785	0.0830462	124.265	102.864	143.027	689.772	482.188	112.109
AT1G16920	377.497	-1.08042	0.561597	-1.92383	0.0543759	0.398095	427.571	448.314	663.017	95.5529	156.608	473.917
AT1G16930	82.4425	-0.0828852	0.885908	-0.0935596	0.925459	0.989631	57.2274	105.435	92.1194	8.95808	85.1728	145.742
AT1G16940	0.408767	-1.78794	3.98886	-0.448234	0.653984	NA	2.4526	0	0	0	0	0
AT1G16950	0.681279	-2.52854	3.95614	-0.639145	0.522729	NA	4.08767	0	0	0	0	0
AT1G16960	19.9907	-1.68918	1.75894	-0.960337	0.336885	0.79071	4.90521	12.0008	74.544	0	27.4751	1.01918
AT1G16970	135.114	0.2464	0.475331	0.518376	0.604196	0.912962	107.915	132.865	130.3	119.441	138.749	181.413
AT1G16980	3.2011	-3.0064	3.89923	-0.771024	0.440693	NA	17.1682	0	0	0	0	2.03835
AT1G17000	0	NA	NA	NA	NA	NA	0	0	0	0	0	0
AT1G17010	0	NA	NA	NA	NA	NA	0	0	0	0	0	0
AT1G17020	58.7203	-1.44223	3.7296	-0.386699	0.698979	0.940701	206.019	0	51.5141	0	94.7891	0
AT1G17030	0	NA	NA	NA	NA	NA	0	0	0	0	0	0
AT1G17040	120.274	0.510148	0.540416	0.94399	0.345175	0.793318	72.7606	121.722	103.028	129.892	192.326	101.918
AT1G17050	668.217	-0.00108943	0.345183	-0.0031561	0.997482	0.999604	782.381	479.173	743.016	868.934	605.826	529.971
AT1G17060	130.962	1.25287	0.630692	1.9865	0.046978	0.372059	66.2203	111.436	54.5444	237.389	241.781	74.3998
AT1G17070	101.071	-0.0882008	0.573118	-0.153897	0.877691	0.980002	129.988	119.15	63.6351	79.1297	108.527	105.994
AT1G17080	1237.21	0.259699	0.291763	0.890103	0.37341	0.809186	860.864	1017.49	1499.36	1331.77	1420.46	1293.33
AT1G17090	35.9367	-1.13337	1.43933	-0.787434	0.431028	0.841904	49.0521	27.4303	71.5137	0	64.5665	3.05753
AT1G17100	1430.13	0.397388	0.394356	1.00769	0.313604	0.77842	1533.7	1072.35	1096.34	2308.2	1807.86	762.344
AT1G17110	530.885	0.339696	0.341874	0.99363	0.320403	0.782241	407.95	496.317	502.414	428.495	571.482	778.65
AT1G17120	401.926	0.0331868	0.454479	0.0730216	0.941789	0.991338	425.936	450.028	315.751	646.475	211.558	361.807
AT1G17130	503.133	0.886254	0.369477	2.39867	0.0164547	0.227638	327.831	363.451	367.872	871.92	684.13	403.594
AT1G17140	586.219	-0.354282	0.467078	-0.758507	0.448147	0.849509	820.805	531.462	622.412	318.012	306.347	918.277
AT1G17145	661.696	0.990053	0.37672	2.62809	0.00858661	0.15769	316.386	510.032	503.02	1077.96	538.512	1024.27
AT1G17147	688.979	0.775251	0.485474	1.59689	0.110289	0.542721	173.317	738.904	612.109	1122.75	706.11	780.689
AT1G17150	0	NA	NA	NA	NA	NA	0	0	0	0	0	0
AT1G17160	509.406	0.655547	0.385843	1.699	0.0893197	0.49822	374.431	397.739	413.931	888.343	614.068	367.923
AT1G17170	145.42	-1.18488	0.896148	-1.32219	0.186104	0.658864	304.123	54.0034	247.268	198.571	56.3239	12.2301
AT1G17180	8.28056	-6.13921	2.91182	-2.10838	0.0349985	0.325832	16.3507	0	33.3327	0	0	0
AT1G17190	109.388	-0.0846678	0.767624	-0.110299	0.912173	0.988166	90.7464	66.8613	179.996	171.697	24.7276	122.301
AT1G17200	1537.13	-0.452071	0.363443	-1.24386	0.213552	0.689094	1911.4	1338.08	2079.35	1248.16	754.191	1891.59
AT1G17210	455.436	-0.169468	0.349838	-0.48442	0.628088	0.920015	444.739	580.322	421.81	316.519	533.017	436.207
AT1G17220	854.17	-0.285655	0.270923	-1.05438	0.291711	0.761956	1078.33	900.057	837.559	785.325	667.645	856.108
AT1G17230	85.9521	0.333222	0.727823	0.457834	0.647072	0.92348	77.6658	42.8598	107.271	173.19	53.5764	61.1506
AT1G17232	0	NA	NA	NA	NA	NA	0	0	0	0	0	0
AT1G17235	0.285732	-1.25867	4.02463	-0.312742	0.754477	NA	0	1.71439	0	0	0	0
AT1G17240	10.9488	7.30511	3.22585	2.26455	0.0235401	0.272284	0	0	0	65.6926	0	0
AT1G17250	0	NA	NA	NA	NA	NA	0	0	0	0	0	0
AT1G17255	33.111	1.07532	1.21904	0.882101	0.377722	0.81232	0.817535	35.1451	27.8782	70.1716	41.2126	23.441
AT1G17260	13.7871	-0.505734	1.74284	-0.290178	0.77168	0.95819	3.27014	20.5727	24.848	0	5.49502	28.5369
AT1G17270	46.9785	-0.969128	1.4279	-0.67871	0.497322	0.871645	63.7677	118.293	4.84839	0	16.4851	78.4765
AT1G17275.1	0	NA	NA	NA	NA	NA	0	0	0	0	0	0
AT1G17277.1	4.35668	-0.632286	3.20545	-0.197254	0.843629	NA	0	6.85757	9.09073	0	0	10.1918
AT1G17280	1057.14	-0.0756983	0.234681	-0.322558	0.74703	0.95275	1065.25	1090.35	1099.37	962.994	1026.19	1098.67
AT1G17285	0	NA	NA	NA	NA	NA	0	0	0	0	0	0
AT1G17290	6944.96	0.700964	0.36641	1.91306	0.0557408	0.40204	3745.13	7299.03	4826.57	5631.65	13350.1	6817.27
AT1G17300	68.1184	0.708784	0.854867	0.829115	0.407039	0.832114	22.891	78.0049	54.5444	50.7625	34.3439	168.164
AT1G17310	16.7736	1.13635	1.6804	0.67624	0.498889	0.87272	2.4526	12.0008	16.9694	0	54.9502	14.2685
AT1G17330	409.276	0.607507	0.316633	1.91865	0.0550293	0.400177	334.372	315.448	323.024	586.754	427.238	468.821
AT1G17340	876.722	0.755163	0.288834	2.61452	0.00893522	0.161303	695.722	686.615	575.14	873.413	1357.27	1072.17
AT1G17345	20.4683	1.54336	1.90369	0.810723	0.417525	0.836301	23.7085	7.71477	0	56.7345	0	34.652
AT1G17350	412.031	0.653864	0.465123	1.40579	0.159787	0.624208	185.58	446.599	328.478	692.758	285.741	533.029
AT1G17360	871.208	0.0699288	0.395481	0.17682	0.85965	0.976531	954.063	840.91	755.743	441.932	1309.19	925.412
AT1G17370	1841.36	0.242385	0.249675	0.970803	0.331647	0.78801	1592.56	1725.54	1743.6	2030.5	1589.43	2366.53
AT1G17380	4698.81	0.572055	0.311885	1.83418	0.0666267	0.436426	2793.52	3695.37	4849	3726.56	6323.39	6805.04
AT1G17390.1	3.14679	1.42283	3.7922	0.375199	0.707512	NA	0	5.14318	0	0	13.7375	0
AT1G17400	2.62621	-4.48517	3.91955	-1.14431	0.252497	NA	0	0	15.7573	0	0	0
AT1G17410	419.939	0.56445	0.369686	1.52684	0.126802	0.572196	305.758	372.023	339.387	350.858	465.703	685.905
AT1G17420	5758.72	0.444332	0.326887	1.35929	0.174056	0.644531	3362.52	6038.09	5236.87	5368.88	5051.3	9494.64
AT1G17430	41.1363	-0.410437	0.952916	-0.430716	0.666675	0.928684	27.7962	56.575	56.3625	14.9301	72.809	18.3452
AT1G17440	317.755	1.17624	0.459317	2.56084	0.0104421	0.178156	96.4691	219.442	268.48	431.481	524.774	365.884
AT1G17450	16.4426	-1.28292	1.19131	-1.0769	0.281524	0.752972	32.7014	17.1439	19.9996	8.95808	13.7375	6.11506
AT1G17455	57.7665	0.255043	0.896039	0.284634	0.775925	0.959692	48.2346	78.8621	30.9085	29.8603	133.254	25.4794
AT1G17460	15.9237	0.333895	1.72306	0.19378	0.846348	0.97352	5.72274	2.57159	33.9387	0	28.8488	24.4602
AT1G17470	519.889	-0.462785	0.367519	-1.25922	0.207953	0.683878	716.16	618.039	473.93	516.583	282.993	511.626
AT1G17480	11.4485	1.04097	2.55284	0.407768	0.683444	0.935433	0	10.2864	12.121	46.2834	0	0
AT1G17490	175.393	0.293733	0.474613	0.618889	0.535989	0.886274	124.265	122.579	225.45	198.571	218.427	163.068
AT1G17495.1	0	NA	NA	NA	NA	NA	0	0	0	0	0	0
AT1G17500	105.852	0.250505	0.734943	0.34085	0.733216	0.950035	103.827	129.437	56.9686	35.8323	210.184	98.8601
AT1G17510	232.208	0.849256	0.481128	1.76514	0.077541	0.465852	121.813	158.581	216.359	292.631	424.49	179.375
AT1G17520	510.564	0.662366	0.398205	1.66338	0.0962363	0.512321	354.81	462.886	367.872	922.682	581.098	374.038
AT1G17530	173.693	0.204537	0.437382	0.467638	0.640043	0.922283	140.616	173.154	170.3	159.752	236.286	162.049
AT1G17540	0	NA	NA	NA	NA	NA	0	0	0	0	0	0
AT1G17545	1.49881	-3.66915	3.92925	-0.933805	0.350404	NA	8.99288	0	0	0	0	0
AT1G17550	259.598	0.847249	0.389418	2.17568	0.0295793	0.297581	225.64	145.723	184.845	346.379	377.782	277.216
AT1G17560	29.1372	-7.95265	1.6531	-4.81074	1.5e-06	0.000479875	31.8839	86.5769	56.3625	0	0	0
AT1G17570	0	NA	NA	NA	NA	NA	0	0	0	0	0	0
AT1G17580	157.459	0.570504	0.466643	1.22257	0.221492	0.697729	157.784	113.15	109.089	237.389	174.467	152.876
AT1G17590	106.848	0.293579	0.545321	0.53836	0.590329	0.908963	64.5852	108.864	114.543	129.892	94.7891	128.416
AT1G17600	40.8178	-0.291747	1.27941	-0.228033	0.819621	0.969926	49.8696	40.2882	44.8476	28.3673	0	81.5341
AT1G17610	43.8913	-1.47998	0.839501	-1.76293	0.0779116	0.466917	71.1255	39.431	83.0287	37.3253	15.1113	17.326
AT1G17615	0	NA	NA	NA	NA	NA	0	0	0	0	0	0
AT1G17620	972.889	-0.25954	0.41874	-0.619812	0.535381	0.886102	499.514	1387.8	1292.7	809.213	1193.79	654.311
AT1G17630	4.27208	1.00381	3.25854	0.308054	0.758041	NA	0	8.57197	0	0	6.86877	10.1918
AT1G17640	135.101	0.138116	0.580147	0.238071	0.811826	0.967325	161.054	125.151	99.392	170.204	189.578	65.2273
AT1G17650	376.257	0.381858	0.458621	0.832622	0.405058	0.830552	493.791	233.158	253.328	583.768	262.387	431.111
AT1G17660	0	NA	NA	NA	NA	NA	0	0	0	0	0	0
AT1G17665	0	NA	NA	NA	NA	NA	0	0	0	0	0	0
AT1G17670	0	NA	NA	NA	NA	NA	0	0	0	0	0	0
AT1G17680	258.49	0.210035	0.467125	0.449633	0.652975	0.924652	233.815	196.298	289.085	147.808	383.277	300.657
AT1G17690	138.576	0.779924	0.71562	1.08986	0.275776	0.748403	100.557	180.869	24.848	143.329	251.397	130.455
AT1G17700	45.4694	0.66338	1.03446	0.641282	0.521339	0.881402	53.1398	27.4303	24.848	132.878	19.2326	15.2876
AT1G17710	18.4804	-7.2955	2.14142	-3.40686	0.000657152	0.0354371	94.0165	1.71439	15.1512	0	0	0
AT1G17720	818.629	1.90179	0.480154	3.9608	7.47e-05	0.00816951	377.701	427.741	231.511	1979.74	1423.21	471.878
AT1G17730	750.781	0.632925	0.268903	2.35373	0.0185862	0.241099	584.537	637.754	544.232	945.077	787.161	1005.93
AT1G17744	0.169863	1.72814	4.08047	0.423516	0.671919	NA	0	0	0	0	0	1.01918
AT1G17745	363.721	-0.451882	0.465766	-0.970191	0.331952	0.788406	597.618	192.869	470.294	304.575	254.145	362.827
AT1G17750	65.8979	-0.364279	0.764734	-0.476347	0.633827	0.920969	62.1326	80.5765	79.3924	104.511	45.3339	23.441
AT1G17760	212.761	-0.0222846	0.484539	-0.0459914	0.963317	0.995523	174.135	254.587	215.147	170.204	137.375	325.117
AT1G17770	0.136256	-0.19541	4.08047	-0.047889	0.961805	NA	0.817535	0	0	0	0	0
AT1G17780	276.727	0.271726	0.464455	0.585043	0.558519	0.895988	330.284	176.583	244.844	349.365	386.025	173.26
AT1G17790	213.443	0.895499	0.44855	1.99643	0.0458873	0.368366	137.346	126.008	184.239	326.97	179.962	326.136
AT1G17800	0	NA	NA	NA	NA	NA	0	0	0	0	0	0
AT1G17810	1.61536	0.800906	3.84158	0.208483	0.834851	NA	0	1.71439	1.81815	0	4.12126	2.03835
AT1G17820	90.9932	0.0446201	0.57497	0.0776042	0.938143	0.990502	80.9359	69.4329	118.179	110.483	74.1827	92.745
AT1G17830	153.85	-0.309626	0.52441	-0.590427	0.554904	0.894378	98.1042	239.158	173.936	114.962	127.759	169.183
AT1G17840	763.107	-0.635695	0.468974	-1.3555	0.175258	0.646551	689.182	1022.64	1075.13	325.477	373.661	1092.56
AT1G17850	91.7524	-0.68323	0.752947	-0.907407	0.364192	0.803171	66.2203	143.152	130.3	19.4092	78.304	113.129
AT1G17860	220.968	-0.539991	0.394694	-1.36813	0.171273	0.641082	240.355	270.874	274.54	189.613	141.497	208.931
AT1G17870	132.683	0.199963	0.540348	0.370063	0.711335	0.944968	85.0236	168.868	116.361	185.134	142.87	97.8409
AT1G17880	3700.16	-0.195686	0.269624	-0.725776	0.467976	0.859212	4579.83	3727.09	3545.38	4189.4	2485.12	3674.13
AT1G17890	341.587	-0.391925	0.347063	-1.12926	0.258787	0.734004	415.308	445.742	302.418	304.575	270.63	310.849
AT1G17900.1	0	NA	NA	NA	NA	NA	0	0	0	0	0	0
AT1G17910	2.38906	-4.34199	3.92089	-1.1074	0.268121	NA	4.90521	9.42916	0	0	0	0
AT1G17920	58.2735	1.07853	0.874858	1.2328	0.217649	0.692882	27.7962	24.8587	59.3928	156.766	28.8488	51.978
AT1G17930	117.466	0.597798	0.583938	1.02374	0.30596	0.773624	98.1042	125.151	57.5746	85.1018	171.719	167.145
AT1G17940	302.573	0.95789	0.426076	2.24817	0.0245654	0.276745	198.661	174.011	243.632	580.782	350.307	268.043
AT1G17950	0	NA	NA	NA	NA	NA	0	0	0	0	0	0
AT1G17960	2.32319	-4.30883	3.92121	-1.09885	0.271833	NA	0	0	13.9391	0	0	0
AT1G17970	553.339	-0.229483	0.310944	-0.738018	0.460503	0.855811	463.542	689.186	638.775	568.838	468.45	491.243
AT1G17980	1070.77	0.795318	0.36429	2.1832	0.0290213	0.296434	670.379	822.909	854.529	2102.16	1083.89	890.76
AT1G17990	17.549	2.90126	1.45503	1.99395	0.0461574	0.369316	2.4526	2.57159	7.27258	55.2415	35.7176	2.03835
AT1G18000	5.95877	2.92742	2.27465	1.28698	0.198102	0.672006	0.817535	0.857197	2.42419	17.9162	13.7375	0
AT1G18010	7.49181	3.23667	2.01565	1.60577	0.108324	0.538261	2.4526	0	1.81815	19.4092	19.2326	2.03835
AT1G18020	151.07	2.71015	0.708307	3.82624	0.000130117	0.012356	31.8839	42.0026	46.0597	437.453	293.983	55.0355
AT1G18030	430.358	0.180176	0.396035	0.454949	0.649146	0.923642	360.533	384.881	464.839	630.052	272.003	469.84
AT1G18040	97.775	-1.59917	0.574982	-2.78125	0.00541506	0.123292	184.763	129.437	127.27	32.8463	52.2027	60.1314
AT1G18050	0	NA	NA	NA	NA	NA	0	0	0	0	0	0
AT1G18060	5842.77	0.426908	0.27551	1.54952	0.121257	0.564042	5627.91	4408.56	4916.27	9138.73	5637.89	5327.23
AT1G18070	1131.76	0.255569	0.319273	0.800472	0.423437	0.838263	1067.7	1207.79	819.378	1419.86	1445.19	830.628
AT1G18075	3.56894	0.250504	2.63323	0.095132	0.92421	NA	0.817535	6.00038	3.03024	0	1.37375	10.1918
AT1G18080	1475.25	-0.380246	0.334041	-1.13832	0.254987	0.730105	1963.72	1356.09	1685.42	1769.22	813.263	1263.78
AT1G18090	30.7018	-0.13894	1.76313	-0.0788034	0.937189	0.990502	59.68	0	36.969	0	23.3538	64.2081
AT1G18100	1.49881	-3.66915	3.92925	-0.933805	0.350404	NA	8.99288	0	0	0	0	0
AT1G18120	0	NA	NA	NA	NA	NA	0	0	0	0	0	0
AT1G18130	5.75635	-4.60725	3.53037	-1.30503	0.191882	0.663942	33.5189	0	0	0	0	1.01918
AT1G18140	7.93279	-2.04891	3.22432	-0.635455	0.525132	0.882737	38.4241	0	0	0	0	9.17258
AT1G18150	318.168	-0.164752	0.405747	-0.406045	0.68471	0.936026	345	238.301	424.84	356.83	326.954	217.084
AT1G18160	532.665	0.40542	0.309475	1.31002	0.190188	0.66256	421.03	562.321	392.114	610.642	545.381	664.503
AT1G18170	853.565	-0.0944663	0.266861	-0.353991	0.723346	0.947329	855.141	789.478	999.98	825.636	730.837	920.316
AT1G18180	45.495	-0.862482	0.942012	-0.915574	0.35989	0.801417	117.725	24.8587	33.3327	47.7764	32.9701	16.3068
AT1G18190	114.955	-0.782214	0.636913	-1.22813	0.219397	0.695094	96.4691	174.011	166.057	83.6087	37.0914	132.493
AT1G18191	8.46128	-3.39354	3.17738	-1.06803	0.285508	0.757056	0	46.2886	0	4.47904	0	0
AT1G18200	482.212	0.316898	0.336228	0.942511	0.345931	0.793318	336.007	502.317	449.688	528.527	641.543	435.188
AT1G18210	2645.77	-0.153246	0.330908	-0.463108	0.643287	0.923048	1899.13	3176.77	3282.97	2681.45	1632.02	3202.25
AT1G18220	0.169863	1.72814	4.08047	0.423516	0.671919	NA	0	0	0	0	0	1.01918
AT1G18230	0.169863	1.72814	4.08047	0.423516	0.671919	NA	0	0	0	0	0	1.01918
AT1G18240.1	0.169863	1.72814	4.08047	0.423516	0.671919	NA	0	0	0	0	0	1.01918
AT1G18250	12.7238	-1.74619	2.02046	-0.864256	0.387448	0.818674	33.5189	4.28598	21.2117	0	0	17.326
AT1G18260	290.538	0.141283	0.426278	0.331433	0.740317	0.951055	181.493	355.737	292.115	289.645	234.912	389.325
AT1G18265	58.4289	0.441486	0.729277	0.605375	0.54493	0.889658	59.68	26.5731	62.423	67.1856	48.0814	86.63
AT1G18270	529.482	0.213417	0.422665	0.50493	0.613608	0.916068	444.739	689.186	336.963	831.608	497.299	377.095
AT1G18280	0.142866	-0.19541	4.08047	-0.047889	0.961805	NA	0	0.857197	0	0	0	0
AT1G18290	11.0258	-0.97701	2.11928	-0.461011	0.644791	0.923449	9.81042	24.8587	9.09073	22.3952	0	0
AT1G18300	2120.82	-1.16227	0.217431	-5.34546	9.02e-08	4.28e-05	3099.27	3072.19	2624.19	1316.84	1252.86	1359.58
AT1G18310	32.5843	0.544128	1.20478	0.451639	0.651529	0.924121	34.3365	42.8598	2.42419	67.1856	10.99	37.7095
AT1G18320	15.4362	0.162811	1.60904	0.101185	0.919403	0.989093	5.72274	18.0011	19.9996	22.3952	0	26.4986
AT1G18330	142.4	-1.35784	0.65286	-2.07983	0.0375408	0.337088	262.429	178.297	174.542	22.3952	93.4153	123.32
AT1G18335	255.292	0.084412	0.421089	0.200461	0.84112	0.972565	206.836	319.734	216.965	212.008	348.934	227.276
AT1G18340	189.319	0.401933	0.547916	0.733566	0.463214	0.857815	168.412	180.869	139.997	129.892	379.156	137.589
AT1G18350	0	NA	NA	NA	NA	NA	0	0	0	0	0	0
AT1G18360	372.377	-0.102211	0.417447	-0.244849	0.806573	0.966131	360.533	313.734	483.021	238.882	313.216	524.876
AT1G18370	0	NA	NA	NA	NA	NA	0	0	0	0	0	0
AT1G18382	4.1979	0.478712	2.55536	0.187337	0.851397	NA	8.17535	1.71439	0.606049	11.9441	2.74751	0
AT1G18390	549.018	-0.137347	0.379517	-0.3619	0.717427	0.945721	378.519	801.479	546.05	418.044	506.915	643.1
AT1G18400	204.868	-0.538476	0.518143	-1.03924	0.298693	0.767915	358.08	228.872	141.209	213.501	107.153	180.394
AT1G18410	11.2833	0.785354	1.98685	0.395277	0.692639	0.938949	3.27014	0.857197	20.6057	35.8323	0	7.13423
AT1G18415	12.9457	0.936332	1.7085	0.548042	0.583663	0.906769	13.8981	4.28598	8.48468	0	35.7176	15.2876
AT1G18420	0	NA	NA	NA	NA	NA	0	0	0	0	0	0
AT1G18430	0	NA	NA	NA	NA	NA	0	0	0	0	0	0
AT1G18440	211.399	0.0282224	0.480637	0.0587188	0.953176	0.9936	144.704	287.161	195.754	276.207	223.922	140.646
AT1G18450	663.9	-0.424917	0.380382	-1.11708	0.26396	0.737267	793.009	797.193	693.926	474.778	357.176	867.319
AT1G18460	1284.09	0.386991	0.337	1.14834	0.250829	0.727023	1065.25	1214.65	1059.98	1049.59	1131.97	2183.07
AT1G18470	1097.6	0.213406	0.443637	0.481038	0.630489	0.920723	479.075	1251.51	1319.37	636.024	1453.43	1446.21
[truncated: 31,611 more rows]
