# Supplementary material for: Companion cells with high florigen production express other small proteins and reveal a nitrogen-sensitive FT repressor
Source: bioRxiv preprint, doi:10.1101/2024.08.17.608367, version 2 (2025-08-08)
Supplement: Supplemental data 10 [file 608367_file12.xlsx]

## Sheet: DataS10_WTvpSUC2NIGT1.2-1
reference_id	WT.rep1	WT.rep2	WT.rep3	pSUC2:NIGT1.2#1.rep1	pSUC2:NIGT1.2#1.rep2	pSUC2:NIGT1.2#1.rep3	logconc	logfc	adj_pvalue	annotation
AT1G01010.1	89	97	97	144	99	139	3.12693	-0.0212734	1	NAC domain containing protein 1
AT1G01020.1	119	114	131	114	141	139	3.79172	-0.344224	0.0324282	Arv1-like protein
AT1G01020.2	106	96	112	100	122	122	3.60884	-0.327285	0.082766	Arv1-like protein
AT1G01030.1	29	28	29	37	52	38	1.78451	0.0989719	0.940402	AP2/B3-like transcriptional factor family protein
AT1G01040.1	481	590	517	630	674	601	5.79237	-0.199038	0.0451779	dicer-like 1
AT1G01040.2	451	564	497	594	637	565	5.72249	-0.212706	0.0294004	dicer-like 1
AT1G01046.1	4	2	7	6	5	5	-1.02578	-0.151959	1	MIR838a; miRNA
AT1G01050.1	532	588	606	865	895	780	6.03154	0.0975893	0.297056	pyrophosphorylase 1
AT1G01060.1	603	639	712	766	870	729	5.53085	-0.184301	0.0212369	Homeodomain-like superfamily protein
AT1G01060.2	592	628	701	753	863	711	5.50604	-0.183342	0.0274275	Homeodomain-like superfamily protein
AT1G01060.3	548	572	640	715	800	680	5.38814	-0.140984	0.1041	Homeodomain-like superfamily protein
AT1G01060.4	598	624	702	759	861	722	5.51833	-0.176145	0.0294339	Homeodomain-like superfamily protein
AT1G01060.5	528	532	619	678	768	648	5.32362	-0.140969	0.127102	Homeodomain-like superfamily protein
AT1G01070.1	130	140	142	239	176	184	3.77628	0.0823479	0.789322	nodulin MtN21 /EamA-like transporter family protein
AT1G01070.2	117	125	125	227	153	169	3.63153	0.123901	0.645044	nodulin MtN21 /EamA-like transporter family protein
AT1G01080.1	529	537	635	852	1075	882	6.24894	0.263566	0.0011557	RNA-binding (RRM/RBD/RNP motifs) family protein
AT1G01080.2	486	497	591	801	1007	822	6.14849	0.280766	0.000556554	RNA-binding (RRM/RBD/RNP motifs) family protein
AT1G01090.1	1207	1298	1435	2277	2531	2275	7.41138	0.387506	1.31e-10	pyruvate dehydrogenase E1 alpha
AT1G01100.1	1372	1532	1604	2344	2373	2291	7.65187	0.178905	0.0177398	60S acidic ribosomal protein family
AT1G01100.2	1617	1774	1896	2798	2830	2737	7.86165	0.204539	0.00406327	60S acidic ribosomal protein family
AT1G01100.3	1252	1377	1439	2212	2230	2164	7.47475	0.241454	0.000750374	60S acidic ribosomal protein family
AT1G01100.4	1366	1525	1600	2334	2366	2281	7.64609	0.178818	0.0180518	60S acidic ribosomal protein family
AT1G01110.1	33	48	45	61	50	59	2.24833	-0.0217642	1	IQ-domain 18
AT1G01110.2	38	60	52	73	65	74	2.54538	0.0435377	1	IQ-domain 18
AT1G01120.1	487	564	663	738	749	536	5.72818	-0.218944	0.114342	3-ketoacyl-CoA synthase 1
AT1G01130.1	14	9	5	18	8	5	0.104138	-0.324762	0.773019	unknown protein
AT1G01140.1	357	434	489	399	510	369	5.16467	-0.461023	2.64e-05	CBL-interacting protein kinase 9
AT1G01140.2	338	413	453	377	479	344	5.07822	-0.464312	3.93e-05	CBL-interacting protein kinase 9
AT1G01140.3	325	409	462	378	479	347	5.06566	-0.448209	4.82e-05	CBL-interacting protein kinase 9
AT1G01150.1	0	1	0	6	0	1	-1.85455	2.04659	0.37694	Homeodomain-like protein with RING/FYVE/PHD-type zinc finger domain
AT1G01160.1	237	233	266	317	295	279	4.83194	-0.182712	0.131677	GRF1-interacting factor 2
AT1G01160.2	216	212	247	280	271	250	4.70788	-0.211494	0.0896497	GRF1-interacting factor 2
AT1G01170.1	370	426	520	420	507	389	5.42211	-0.456891	8.04e-07	Protein of unknown function (DUF1138)
AT1G01170.2	290	351	423	323	403	323	5.14744	-0.476501	7.25e-07	Protein of unknown function (DUF1138)
AT1G01180.1	62	58	56	83	63	65	2.77201	-0.198624	0.518181	S-adenosyl-L-methionine-dependent methyltransferases superfamily protein
AT1G01183.1	0	0	0	0	0	0	-2.68611	0	1	MIR165/MIR165A; miRNA
AT1G01190.1	175	171	145	387	257	251	4.13047	0.399372	0.0778468	cytochrome P450, family 78, subfamily A, polypeptide 8
AT1G01200.1	26	24	28	50	25	44	1.73492	0.154546	0.812685	RAB GTPase homolog A3
AT1G01210.1	87	96	113	147	195	167	3.86046	0.323387	0.0371354	DNA-directed RNA polymerase, subunit M, archaeal
AT1G01220.1	321	284	413	448	493	489	5.17232	0.0360253	0.911021	L-fucokinase/GDP-L-fucose pyrophosphorylase
AT1G01225.1	25	31	43	49	40	44	2.01331	-0.0294022	1	NC domain-containing protein-related
AT1G01230.1	179	168	201	255	242	245	4.41056	-0.0206373	1	ORMDL family protein
AT1G01240.1	206	186	236	119	151	115	3.96302	-1.16488	1.48e-24	unknown protein
AT1G01240.2	199	173	222	115	151	111	3.91493	-1.11581	2.47e-20	unknown protein
AT1G01240.3	212	186	240	137	157	120	4.01592	-1.08313	2.91e-21	unknown protein
AT1G01250.1	66	35	60	46	46	21	2.49943	-0.975137	0.000149972	Integrase-type DNA-binding superfamily protein
AT1G01260.1	129	156	169	223	193	197	4.0615	-0.0224571	1	basic helix-loop-helix (bHLH) DNA-binding superfamily protein
AT1G01260.2	119	144	156	213	178	189	3.98875	0.0141031	1	basic helix-loop-helix (bHLH) DNA-binding superfamily protein
AT1G01260.3	127	151	161	217	188	194	4.02908	-0.00784212	1	basic helix-loop-helix (bHLH) DNA-binding superfamily protein
AT1G01280.1	0	0	0	0	0	0	-0.176019	0	1	cytochrome P450, family 703, subfamily A, polypeptide 2
AT1G01290.1	99	99	124	120	116	136	3.57386	-0.247626	0.160117	cofactor of nitrate reductase and xanthine dehydrogenase 3
AT1G01290.2	105	106	131	122	125	133	3.61418	-0.304219	0.0674265	cofactor of nitrate reductase and xanthine dehydrogenase 3
AT1G01300.1	376	407	439	725	766	695	5.90024	0.38019	3.83e-05	Eukaryotic aspartyl protease family protein
AT1G01310.1	0	2	1	0	1	0	-2.30749	-1.66781	0.858987	CAP (Cysteine-rich secretory proteins, Antigen 5, and Pathogenesis-related 1 protein) superfamily protein
AT1G01320.1	4168	4657	5273	6480	8816	6746	9.11399	0.183761	0.0358745	Tetratricopeptide repeat (TPR)-like superfamily protein
AT1G01320.2	4121	4628	5252	6448	8780	6696	9.10448	0.186175	0.0339818	Tetratricopeptide repeat (TPR)-like superfamily protein
AT1G01340.1	75	67	72	88	87	93	2.66756	-0.135236	0.70973	cyclic nucleotide gated channel 10
AT1G01340.2	81	70	73	91	94	97	2.76104	-0.129982	0.750664	cyclic nucleotide gated channel 10
AT1G01350.1	160	178	174	250	237	237	4.28566	0.0412059	0.923875	Zinc finger (CCCH-type/C3HC4-type RING finger) family protein
AT1G01355.1	0	0	0	1	0	0	-2.44755	1.72433	1	Putative endonuclease or glycosyl hydrolase
AT1G01360.1	161	121	150	138	129	144	3.75765	-0.531578	0.000396288	regulatory component of ABA receptor 1
AT1G01370.1	66	45	52	63	67	72	2.79356	-0.150889	0.646288	Histone superfamily protein
AT1G01370.2	67	46	54	62	67	74	2.81741	-0.178729	0.553105	Histone superfamily protein
AT1G01380.1	12	11	23	19	11	22	0.815208	-0.274403	0.695042	Homeodomain-like superfamily protein
AT1G01390.1	75	91	104	67	96	68	3.21881	-0.682696	7.77e-05	UDP-Glycosyltransferase superfamily protein
AT1G01400.1	0	0	0	0	0	0	-2.62964	0	1	unknown protein
AT1G01420.1	92	87	113	113	135	124	3.73812	-0.10834	0.688743	UDP-glucosyl transferase 72B3
AT1G01430.1	437	439	485	551	707	526	5.6826	-0.0732605	0.62633	TRICHOME BIREFRINGENCE-LIKE 25
AT1G01440.1	127	147	161	218	204	198	3.9666	0.0536941	0.831772	Protein of unknown function (DUF3133)
AT1G01450.1	42	40	40	45	45	48	2.11093	-0.280946	0.393959	Protein kinase superfamily protein
AT1G01453.1	2	1	3	5	4	8	-1.24164	1.02081	0.460393	unknown protein
AT1G01453.2	2	1	1	5	3	8	-1.36344	1.47664	0.328058	unknown protein
AT1G01460.1	0	1	0	0	0	0	-2.68607	-2.05912	1	Phosphatidylinositol-4-phosphate 5-kinase, core
AT1G01470.1	465	558	588	565	460	451	6.26338	-0.580961	3.38e-08	Late embryogenesis abundant protein
AT1G01480.1	7	9	11	12	14	26	-0.0331394	0.490133	0.44963	1-amino-cyclopropane-1-carboxylate synthase 2
AT1G01480.2	5	7	9	11	12	22	-0.214623	0.640501	0.317258	1-amino-cyclopropane-1-carboxylate synthase 2
AT1G01490.1	556	571	670	665	749	657	5.78547	-0.253715	0.00424251	Heavy metal transport/detoxification superfamily protein
AT1G01490.2	521	543	644	613	697	621	5.698	-0.280549	0.00177766	Heavy metal transport/detoxification superfamily protein
AT1G01500.1	98	122	128	195	188	163	4.15224	0.19172	0.246038	Erythronate-4-phosphate dehydrogenase family protein
AT1G01510.1	342	413	444	600	606	518	5.53956	0.0663273	0.631211	NAD(P)-binding Rossmann-fold superfamily protein
AT1G01520.1	52	54	78	45	62	59	2.38478	-0.603949	0.00255977	Homeodomain-like superfamily protein
AT1G01540.1	553	606	677	739	782	706	5.90736	-0.179302	0.0221392	Protein kinase superfamily protein
AT1G01540.2	577	629	710	771	814	741	5.98091	-0.177837	0.0217335	Protein kinase superfamily protein
AT1G01550.1	1031	1093	1163	1211	1225	1132	6.76464	-0.340951	3.94e-08	Protein of unknown function (DUF793)
AT1G01550.2	983	1041	1117	1134	1168	1057	6.70278	-0.362623	5.26e-09	Protein of unknown function (DUF793)
AT1G01560.1	17	33	12	11	10	13	0.586016	-1.32336	0.0572693	MAP kinase 11
AT1G01560.2	18	42	16	12	10	16	0.748031	-1.44921	0.0270878	MAP kinase 11
AT1G01570.1	23	21	24	41	39	25	1.26759	0.165441	0.811862	Protein of unknown function (DUF604)
AT1G01580.1	133	117	113	274	25	58	3.54323	-0.480153	0.594685	ferric reduction oxidase 2
AT1G01590.1	4	2	7	5	3	3	-0.644711	-0.674974	0.574188	ferric reduction oxidase 1
AT1G01600.1	74	88	105	175	142	145	3.5501	0.337453	0.0866326	cytochrome P450, family 86, subfamily A, polypeptide 4
AT1G01610.1	372	425	468	766	700	646	5.70298	0.282711	0.00113843	glycerol-3-phosphate acyltransferase 4
AT1G01620.1	3041	2994	3420	4121	4068	3657	8.29363	-0.134768	0.0635445	plasma membrane intrinsic protein 1C
AT1G01620.2	2701	2646	3044	3641	3576	3237	8.12784	-0.142593	0.0523256	plasma membrane intrinsic protein 1C
AT1G01630.1	393	518	565	723	698	704	5.84227	0.0727323	0.539788	Sec14p-like phosphatidylinositol transfer family protein
AT1G01640.1	38	38	45	60	35	60	1.96799	-0.0934947	0.948736	BTB/POZ domain-containing protein
AT1G01640.2	34	37	42	50	29	54	1.86013	-0.21445	0.647683	BTB/POZ domain-containing protein
AT1G01650.1	238	276	342	480	361	339	5.00888	0.01131	1	SIGNAL PEPTIDE PEPTIDASE-LIKE 4
AT1G01650.2	230	271	338	460	346	330	4.97335	-0.01387	1	SIGNAL PEPTIDE PEPTIDASE-LIKE 4
AT1G01660.1	14	22	7	30	20	27	0.54414	0.373989	0.564261	RING/U-box superfamily protein
AT1G01670.1	9	15	15	26	14	28	0.656894	0.349908	0.552804	RING/U-box superfamily protein
AT1G01680.1	3	1	5	1	2	2	-0.783468	-1.22909	0.460422	plant U-box 54
AT1G01690.1	51	61	69	85	67	85	2.90377	-0.0669023	0.92982	putative recombination initiation defects 3
AT1G01695.1	9	5	10	4	3	5	-0.628507	-1.42444	0.0513618	Phosphatidylinositol N-acetyglucosaminlytransferase subunit P-related
AT1G01700.1	14	17	11	24	24	27	1.01617	0.374697	0.479998	RHO guanyl-nucleotide exchange factor 2
AT1G01710.1	264	334	291	382	362	369	5.00863	-0.13443	0.353308	Acyl-CoA thioesterase family protein
AT1G01720.1	501	661	659	482	464	462	5.63904	-0.825174	4.62e-17	NAC (No Apical Meristem) domain transcriptional regulator superfamily protein
AT1G01725.1	39	47	58	44	56	42	2.2318	-0.476228	0.0744305	unknown protein
AT1G01730.1	128	138	157	134	162	162	3.95969	-0.342844	0.00927855	unknown protein
AT1G01740.1	65	57	59	64	86	67	2.85528	-0.198548	0.413374	Protein kinase protein with tetratricopeptide repeat domain
AT1G01740.2	69	59	60	67	92	69	2.9191	-0.182766	0.459765	Protein kinase protein with tetratricopeptide repeat domain
AT1G01750.1	92	77	48	165	96	135	2.76289	0.394316	0.310565	actin depolymerizing factor 11
AT1G01760.1	23	39	27	37	32	31	1.75595	-0.289487	0.519036	adenosine deaminases;RNA binding;RNA binding;adenosine deaminases
AT1G01770.1	178	182	234	208	234	210	4.26132	-0.322052	0.0133116	unknown protein
AT1G01780.1	83	102	93	133	102	97	3.33183	-0.202309	0.398708	GATA type zinc finger transcription factor family protein
AT1G01790.1	2050	2077	2403	2590	2826	2548	7.9003	-0.172374	0.0184012	K+ efflux antiporter 1
AT1G01800.1	607	585	741	791	831	787	6.04309	-0.138943	0.144392	NAD(P)-binding Rossmann-fold superfamily protein
AT1G01800.2	558	560	708	747	772	738	5.96206	-0.149835	0.110128	NAD(P)-binding Rossmann-fold superfamily protein
AT1G01810.1	5	4	3	5	9	10	-0.212098	0.52799	0.584416	unknown protein
AT1G01820.1	294	313	339	364	343	373	5.27933	-0.265596	0.00962803	peroxin 11c
AT1G01830.1	183	178	179	233	262	230	4.33667	-0.037263	0.941607	ARM repeat superfamily protein
AT1G01830.2	187	184	188	240	269	239	4.36852	-0.041444	0.909184	ARM repeat superfamily protein
AT1G01830.3	188	189	196	250	277	251	4.40952	-0.0193959	1	ARM repeat superfamily protein
AT1G01840.1	36	31	41	36	37	25	1.96162	-0.597659	0.0325259	unknown protein
AT1G01860.1	135	137	164	167	208	146	3.93515	-0.203479	0.216509	Ribosomal RNA adenine dimethylase family protein
AT1G01880.1	9	20	22	18	15	27	1.27918	-0.213501	0.793593	5'-3' exonuclease family protein
AT1G01880.2	9	20	19	15	15	27	1.22455	-0.201037	0.840152	5'-3' exonuclease family protein
AT1G01900.1	196	180	203	303	319	316	4.49615	0.236701	0.0577153	subtilase family protein
AT1G01910.1	386	405	456	557	548	561	5.50459	-0.0386108	0.867023	P-loop containing nucleoside triphosphate hydrolases superfamily protein
AT1G01910.2	438	460	507	622	614	643	5.69867	-0.0372836	0.86009	P-loop containing nucleoside triphosphate hydrolases superfamily protein
AT1G01910.3	416	427	488	600	590	608	5.6195	-0.022645	0.977668	P-loop containing nucleoside triphosphate hydrolases superfamily protein
AT1G01910.4	403	415	460	563	557	572	5.5314	-0.0523903	0.762008	P-loop containing nucleoside triphosphate hydrolases superfamily protein
AT1G01910.5	345	372	410	516	507	520	5.42321	-0.00343303	1	P-loop containing nucleoside triphosphate hydrolases superfamily protein
AT1G01920.1	110	114	109	163	147	164	3.94831	0.0507948	0.898455	SET domain-containing protein
AT1G01920.2	120	129	125	181	166	196	4.11796	0.0802151	0.748435	SET domain-containing protein
AT1G01930.1	141	150	147	177	214	185	4.05574	-0.0647439	0.775111	zinc finger protein-related
AT1G01940.1	75	95	81	125	104	141	3.60018	0.103762	0.737369	Cyclophilin-like peptidyl-prolyl cis-trans isomerase family protein
AT1G01950.1	224	262	281	351	372	337	4.73698	0.00890425	1	armadillo repeat kinesin 2
AT1G01950.2	217	246	267	324	350	323	4.66079	-0.00826036	1	armadillo repeat kinesin 2
AT1G01950.3	219	256	274	337	358	328	4.69597	-0.00804329	1	armadillo repeat kinesin 2
AT1G01960.1	733	820	909	1427	1350	1287	6.50369	0.266837	0.000119808	SEC7-like guanine nucleotide exchange family protein
AT1G01970.1	278	329	373	365	484	405	5.26877	-0.102001	0.46937	Tetratricopeptide repeat (TPR)-like superfamily protein
AT1G01980.1	0	0	0	0	0	1	-2.47204	1.72555	1	FAD-binding Berberine family protein
AT1G01990.1	129	157	174	172	205	212	4.21049	-0.0995387	0.619035	unknown protein
AT1G02000.1	84	103	105	126	126	129	3.36277	-0.073252	0.850842	UDP-D-glucuronate 4-epimerase 2
AT1G02010.1	150	158	170	161	180	147	4.04763	-0.429579	0.000743408	secretory 1A
AT1G02010.2	122	129	149	137	147	125	3.78761	-0.426014	0.00153886	secretory 1A
AT1G02020.1	115	128	146	155	186	151	3.8266	-0.119679	0.518116	nitroreductase family protein
AT1G02020.2	107	121	140	150	172	142	3.74696	-0.123795	0.510034	nitroreductase family protein
AT1G02030.1	5	8	4	6	2	5	-0.27487	-0.82456	0.376951	C2H2-like zinc finger protein
AT1G02040.1	0	0	0	0	0	0	-2.65766	0	1	C2H2-type zinc finger family protein
AT1G02050.1	45	54	50	63	52	79	3.03327	-0.0689752	1	Chalcone and stilbene synthase family protein
AT1G02060.1	59	79	75	84	93	88	2.91931	-0.14261	0.615715	Tetratricopeptide repeat (TPR)-like superfamily protein
AT1G02065.1	29	22	33	14	20	12	1.49493	-1.31998	1.79e-05	squamosa promoter binding protein-like 8
AT1G02065.2	27	17	31	13	18	10	1.38148	-1.32175	8.4e-05	squamosa promoter binding protein-like 8
AT1G02070.1	0	5	3	5	0	1	-1.10163	-0.823633	0.695042	unknown protein
AT1G02074.1	0	0	0	0	0	0	-2.71525	0	1	unknown protein
AT1G02080.1	1376	1520	1572	2058	1916	1860	7.24857	-0.0731717	0.560058	transcription regulators
AT1G02080.2	1407	1541	1598	2106	1946	1889	7.26866	-0.0720809	0.577269	transcription regulators
AT1G02090.1	243	298	330	368	383	384	5.09106	-0.0736936	0.641051	Proteasome component (PCI) domain protein
AT1G02090.2	241	290	321	353	376	378	5.05614	-0.0784422	0.595975	Proteasome component (PCI) domain protein
AT1G02090.3	254	297	339	377	384	391	5.12323	-0.0836225	0.547705	Proteasome component (PCI) domain protein
AT1G02100.1	251	298	291	320	305	331	4.8943	-0.270495	0.00893788	Leucine carboxyl methyltransferase
AT1G02100.2	234	267	262	297	285	308	4.7549	-0.235424	0.0404574	Leucine carboxyl methyltransferase
AT1G02100.3	249	295	285	318	306	328	4.87244	-0.257789	0.015648	Leucine carboxyl methyltransferase
AT1G02110.1	191	216	244	332	391	355	4.93155	0.269904	0.0156305	Protein of unknown function (DUF630 and DUF632)
AT1G02120.1	545	591	695	710	681	652	5.90646	-0.297932	5.47e-05	GRAM domain family protein
AT1G02130.1	363	449	442	569	539	466	5.53638	-0.130676	0.216818	RAS 5
AT1G02140.1	766	797	879	1173	1131	1044	6.60447	-0.00335522	1	mago nashi family protein
AT1G02145.1	169	200	211	277	237	221	4.39533	-0.115522	0.479617	homolog of asparagine-linked glycosylation 12
AT1G02145.2	134	152	142	201	176	173	3.96352	-0.0969857	0.611772	homolog of asparagine-linked glycosylation 12
AT1G02145.3	181	204	221	291	247	231	4.46183	-0.113776	0.473736	homolog of asparagine-linked glycosylation 12
AT1G02145.4	182	207	212	282	242	221	4.41968	-0.148442	0.297255	homolog of asparagine-linked glycosylation 12
AT1G02150.1	889	943	1110	1489	1900	1476	7.05493	0.2652	0.000806319	Tetratricopeptide repeat (TPR)-like superfamily protein
AT1G02160.1	106	147	127	162	176	168	4.05282	-0.0452251	0.94807	Cox19 family protein (CHCH motif)
AT1G02160.2	88	125	107	145	153	154	3.86476	0.0404534	0.962884	Cox19 family protein (CHCH motif)
AT1G02170.1	176	192	195	299	230	241	4.39511	-0.00574437	1	metacaspase 1
AT1G02180.1	38	21	39	61	77	59	2.50203	0.545154	0.0368917	ferredoxin-related
AT1G02190.1	36	34	38	6	12	9	1.75992	-2.44246	1.34e-12	Fatty acid hydroxylase superfamily
AT1G02190.2	35	34	37	6	11	9	1.68653	-2.46866	6.69e-13	Fatty acid hydroxylase superfamily
AT1G02205.1	676	1075	1250	787	972	545	6.61126	-0.834862	1.26e-05	Fatty acid hydroxylase superfamily
AT1G02205.2	697	1108	1295	812	999	560	6.64891	-0.840097	1.03e-05	Fatty acid hydroxylase superfamily
AT1G02205.3	635	1006	1184	743	927	515	6.50662	-0.824047	2.07e-05	Fatty acid hydroxylase superfamily
AT1G02220.1	254	245	239	401	165	240	4.36064	-0.328773	0.290349	NAC domain containing protein 3
AT1G02230.1	16	27	17	33	10	25	0.781716	-0.268078	0.744659	NAC domain containing protein 4
AT1G02250.1	6	4	4	14	2	5	-0.453438	0.124127	1	NAC domain containing protein 5
AT1G02260.1	150	147	155	204	162	183	3.95982	-0.177306	0.324956	Divalent ion symporter
AT1G02270.1	208	204	225	272	289	244	4.55489	-0.121976	0.34238	Calcium-binding endonuclease/exonuclease/phosphatase family
AT1G02280.1	474	561	598	883	1090	821	6.1534	0.313912	0.000295796	translocon at the outer envelope membrane of chloroplasts 33
AT1G02280.2	462	548	584	846	1046	794	6.11136	0.292111	0.000920497	translocon at the outer envelope membrane of chloroplasts 33
AT1G02290.1	77	95	121	146	144	129	3.49707	0.0592684	0.858815	unknown protein
AT1G02300.1	107	82	125	111	107	95	3.81678	-0.461922	0.0269418	Cysteine proteinases superfamily protein
AT1G02305.1	796	781	845	1054	921	880	6.25949	-0.222698	0.00957115	Cysteine proteinases superfamily protein
AT1G02310.1	29	24	18	46	25	25	1.51594	-0.0350565	1	Glycosyl hydrolase superfamily protein
AT1G02320.1	0	0	0	0	0	0	-2.65762	0	1	unknown protein
AT1G02330.1	218	246	279	396	358	374	4.94657	0.146465	0.209591	unknown protein
AT1G02335.1	172	186	217	215	200	177	4.18474	-0.414176	0.0316901	germin-like protein subfamily 2 member 2 precursor
AT1G02340.1	316	304	351	193	214	194	5.19798	-1.15195	1.02e-14	basic helix-loop-helix (bHLH) DNA-binding superfamily protein
AT1G02350.1	10	14	7	13	25	10	0.60196	0.155845	0.975282	protoporphyrinogen oxidase-related
AT1G02360.1	240	264	205	410	180	324	4.48513	-0.0891597	0.912469	Chitinase family protein
AT1G02370.1	65	88	70	92	100	135	3.38243	0.0967363	0.831913	Tetratricopeptide repeat (TPR)-like superfamily protein
AT1G02380.1	11	24	30	33	32	22	1.45678	-0.0327563	1	unknown protein
AT1G02390.1	18	28	29	35	18	23	1.80134	-0.429647	0.366753	glycerol-3-phosphate acyltransferase 2
AT1G02400.1	51	62	47	107	50	63	2.53737	0.000871568	1	gibberellin 2-oxidase 6
AT1G02405.1	0	0	2	1	1	2	-1.80654	0.483163	1	proline-rich family protein
AT1G02410.1	161	171	211	278	254	222	4.38342	0.0161089	1	cytochrome c oxidase assembly protein CtaG / Cox11 family
AT1G02420.1	26	33	45	63	53	52	2.19722	0.233863	0.422814	Pentatricopeptide repeat (PPR) superfamily protein
AT1G02430.1	15	13	10	20	20	17	0.912539	0.123827	0.964155	ADP-ribosylation factor D1B
AT1G02440.1	5	1	4	5	1	2	-1.27427	-0.749258	0.686954	ADP-ribosylation factor D1A
AT1G02450.1	7	7	7	4	4	7	-0.347104	-0.923529	0.282274	NIM1-interacting 1
AT1G02460.1	26	18	24	61	39	53	1.80395	0.711238	0.0258085	Pectin lyase-like superfamily protein
AT1G02470.1	6	8	11	3	8	8	-0.0276046	-0.837319	0.23343	Polyketide cyclase/dehydrase and lipid transport superfamily protein
AT1G02470.2	6	6	10	3	7	4	-0.141755	-1.08624	0.121614	Polyketide cyclase/dehydrase and lipid transport superfamily protein
AT1G02475.1	439	425	583	470	606	443	5.49432	-0.388522	5.28e-05	Polyketide cyclase/dehydrase and lipid transport superfamily protein
AT1G02490.1	0	1	0	2	1	0	-2.497	0.923916	0.859233	unknown protein
AT1G02500.1	2882	3105	3040	4459	3723	3835	8.29594	-0.0467287	0.772991	S-adenosylmethionine synthetase 1
AT1G02500.2	2743	2967	2914	4253	3557	3657	8.23872	-0.0481967	0.759658	S-adenosylmethionine synthetase 1
AT1G02510.1	0	0	0	0	0	0	-2.47223	0	1	Outward rectifying potassium channel protein
AT1G02520.1	303	320	229	627	255	362	4.66823	0.0815033	0.958553	P-glycoprotein 11
AT1G02530.1	28	36	17	64	27	36	1.47038	0.183189	0.814639	P-glycoprotein 12
AT1G02560.1	1631	1841	2093	2703	3417	2701	7.8192	0.205172	0.00529055	nuclear encoded CLP protease 5
AT1G02570.1	4	0	1	4	1	6	-1.4229	0.646726	0.728878	unknown protein
AT1G02575.1	1	2	1	5	2	5	-1.70018	1.07095	0.564261	unknown protein
AT1G02580.1	0	3	2	1	6	3	-1.22176	0.513997	0.850385	SET domain-containing protein
AT1G02610.1	27	17	26	12	12	9	0.913899	-1.53519	0.000246077	RING/FYVE/PHD zinc finger superfamily protein
AT1G02620.1	0	0	1	0	0	0	-2.20108	-2.05429	1	Ras-related small GTP-binding family protein
AT1G02630.1	9	7	13	4	4	6	-0.222825	-1.47892	0.0101744	Nucleoside transporter family protein
AT1G02630.2	6	5	12	3	3	5	-0.510917	-1.48318	0.0335365	Nucleoside transporter family protein
AT1G02640.1	109	108	96	158	164	150	3.36615	0.128502	0.650964	beta-xylosidase 2
AT1G02650.1	3	4	7	2	11	11	-0.774815	0.315666	0.781056	Tetratricopeptide repeat (TPR)-like superfamily protein
AT1G02660.1	37	37	53	59	78	50	2.19808	0.0990333	0.860879	alpha/beta-Hydrolases superfamily protein
AT1G02670.1	16	25	26	20	19	11	1.39303	-0.873915	0.0326225	P-loop containing nucleoside triphosphate hydrolases superfamily protein
AT1G02680.1	73	89	91	92	92	87	3.30237	-0.358072	0.0622843	TBP-associated factor 13
AT1G02681.1	0	0	0	0	0	0	-2.68618	0	1	pseudogene
AT1G02690.1	152	168	175	327	269	290	4.46298	0.383585	0.00539704	importin alpha isoform 6
AT1G02690.2	144	161	160	315	255	286	4.40068	0.42396	0.00288501	importin alpha isoform 6
AT1G02700.1	11	6	9	14	17	11	0.539384	0.225338	0.890787	unknown protein
AT1G02710.1	5	7	11	13	18	21	0.483373	0.713175	0.157398	glycine-rich protein
AT1G02720.1	83	110	122	179	186	193	3.80425	0.369291	0.0108378	galacturonosyltransferase 5
AT1G02720.2	59	84	99	140	147	155	3.44786	0.414748	0.0117693	galacturonosyltransferase 5
AT1G02730.1	323	388	422	747	841	877	5.65436	0.667971	2.48e-10	cellulose synthase-like D5
AT1G02740.1	59	76	62	74	90	83	2.92933	-0.133797	0.679545	MRG family protein
AT1G02750.1	100	106	79	109	94	86	3.27906	-0.444111	0.0185785	Drought-responsive family protein
AT1G02750.2	85	81	59	78	73	62	2.94069	-0.546297	0.0125973	Drought-responsive family protein
AT1G02770.1	1	3	8	4	5	5	-0.920307	-0.216468	1	Protein of unknown function (DUF626)
AT1G02780.1	4956	5464	5807	9442	10081	9628	9.51813	0.387348	1.51e-14	Ribosomal protein L19e family protein
AT1G02800.1	43	47	60	86	95	70	2.8673	0.283742	0.258074	cellulase 2
AT1G02810.1	78	74	72	145	101	109	2.92711	0.203179	0.577865	Plant invertase/pectin methylesterase inhibitor superfamily
AT1G02813.1	0	1	0	3	1	1	-1.30876	1.58799	0.677004	Protein of unknown function, DUF538
AT1G02816.1	159	186	191	192	155	179	3.7535	-0.481734	0.00157311	Protein of unknown function, DUF538
AT1G02820.1	295	325	387	223	328	149	5.20588	-0.992333	1.25e-09	Late embryogenesis abundant 3 (LEA3) family protein
AT1G02830.1	0	0	1	0	0	0	-2.35266	-2.05515	1	Ribosomal L22e protein family
AT1G02840.1	744	781	920	1127	1170	1115	6.68134	0.0242104	0.888729	RNA-binding (RRM/RBD/RNP motifs) family protein
AT1G02840.2	766	817	935	1145	1202	1145	6.72977	0.0148327	0.984154	RNA-binding (RRM/RBD/RNP motifs) family protein
AT1G02840.3	708	757	895	1087	1123	1073	6.6315	0.020133	0.931028	RNA-binding (RRM/RBD/RNP motifs) family protein
AT1G02850.1	217	394	616	252	303	201	4.50866	-1.13203	2.1e-06	beta glucosidase 11
AT1G02850.2	216	391	614	249	305	204	4.50834	-1.121	2.83e-06	beta glucosidase 11
AT1G02850.3	210	386	602	248	301	200	4.48358	-1.11078	3.82e-06	beta glucosidase 11
AT1G02850.4	207	374	588	240	291	196	4.46068	-1.11834	2.81e-06	beta glucosidase 11
AT1G02850.5	218	396	625	254	311	207	4.54109	-1.11548	3.38e-06	beta glucosidase 11
AT1G02860.1	71	70	84	81	110	83	3.02661	-0.175783	0.510026	SPX (SYG1/Pho81/XPR1) domain-containing protein
AT1G02860.2	64	58	81	71	104	79	2.8838	-0.135587	0.667105	SPX (SYG1/Pho81/XPR1) domain-containing protein
AT1G02870.1	124	125	131	190	221	216	4.29974	0.263144	0.0678643	unknown protein
AT1G02880.1	115	136	143	225	162	156	3.87758	0.00675836	1	thiamin pyrophosphokinase1
AT1G02880.2	119	142	146	227	169	166	3.92086	0.00940083	1	thiamin pyrophosphokinase1
AT1G02880.3	120	143	152	233	175	167	3.94885	0.0146622	1	thiamin pyrophosphokinase1
AT1G02880.4	120	139	145	228	170	167	3.9278	0.0275377	1	thiamin pyrophosphokinase1
AT1G02890.1	903	976	980	1200	1170	1080	6.56206	-0.189463	0.0221495	AAA-type ATPase family protein
AT1G02890.2	856	926	918	1135	1111	1013	6.46621	-0.189647	0.0257311	AAA-type ATPase family protein
AT1G02900.1	174	169	170	231	188	211	4.03237	-0.162799	0.423902	rapid alkalinization factor 1
AT1G02910.1	460	513	614	580	748	578	5.81164	-0.194155	0.0636419	tetratricopeptide repeat (TPR)-containing protein
AT1G02920.1	1484	2034	1407	1680	750	1031	6.68275	-0.966276	0.0107606	glutathione S-transferase 7
AT1G02930.1	1089	1521	1146	1038	541	734	6.23376	-1.15318	0.000395188	glutathione S-transferase 6
AT1G02930.2	983	1376	1030	926	495	663	6.0794	-1.15571	0.000290274	glutathione S-transferase 6
AT1G02940.1	1	4	4	7	2	1	-1.14985	-0.292545	1	glutathione S-transferase (class phi) 5
AT1G02950.1	66	59	78	97	89	92	2.99165	-0.00328741	1	glutathione S-transferase F4
AT1G02950.2	63	55	77	93	83	82	2.903	-0.052852	0.974606	glutathione S-transferase F4
AT1G02950.3	59	52	71	93	77	81	2.86054	0.00756058	1	glutathione S-transferase F4
AT1G02950.4	58	50	67	83	76	72	2.7052	-0.0572867	0.962372	glutathione S-transferase F4
AT1G02960.1	146	128	165	161	178	180	3.88021	-0.216064	0.209603	unknown protein
AT1G02960.2	147	131	165	161	178	187	3.92151	-0.209441	0.261386	unknown protein
AT1G02960.3	144	142	167	162	179	179	3.91899	-0.258483	0.108635	unknown protein
AT1G02965.1	0	0	0	1	0	0	-2.68614	1.72451	1	unknown protein
AT1G02970.1	56	39	52	67	73	74	2.58964	0.0824138	0.881157	WEE1 kinase homolog
AT1G02980.1	0	3	2	1	1	0	-1.58909	-1.58459	0.529194	cullin 2
AT1G02990.1	251	296	304	308	303	349	4.73355	-0.281744	0.00880601	unknown protein
AT1G02990.2	259	300	311	311	312	353	4.75929	-0.290223	0.00486572	unknown protein
AT1G02990.3	262	304	315	319	319	358	4.78654	-0.279196	0.00612731	unknown protein
AT1G03000.1	254	295	320	356	377	365	5.03734	-0.119476	0.346076	peroxin 6
AT1G03010.1	9	11	13	20	12	17	0.388681	0.113947	1	Phototropic-responsive NPH3 family protein
AT1G03020.1	16	12	16	1	1	2	0.086145	-3.78048	5.23e-10	Thioredoxin superfamily protein
AT1G03030.1	119	154	183	164	171	165	3.83239	-0.322948	0.0132481	P-loop containing nucleoside triphosphate hydrolases superfamily protein
AT1G03040.1	347	348	416	370	441	403	5.29756	-0.33021	0.000160114	basic helix-loop-helix (bHLH) DNA-binding superfamily protein
AT1G03040.2	327	327	400	349	408	379	5.21819	-0.349494	8.64e-05	basic helix-loop-helix (bHLH) DNA-binding superfamily protein
AT1G03050.1	1	0	1	0	0	1	-2.14011	-1.14896	1	ENTH/ANTH/VHS superfamily protein
AT1G03055.1	86	86	125	85	129	78	3.38465	-0.482863	0.00544229	unknown protein
AT1G03055.2	78	80	117	84	121	72	3.26589	-0.44755	0.013229	unknown protein
AT1G03060.1	616	748	777	1173	1152	1167	6.22404	0.251411	0.0201227	Beige/BEACH domain ;WD domain, G-beta repeat protein
AT1G03070.1	24	28	14	23	23	21	1.2045	-0.442778	0.359644	Bax inhibitor-1 family protein
AT1G03070.2	21	28	16	20	22	19	1.13865	-0.552051	0.176426	Bax inhibitor-1 family protein
AT1G03080.1	806	884	933	1260	1085	1302	6.47891	0.0224666	0.984154	kinase interacting (KIP1-like) family protein
AT1G03090.1	185	197	224	267	293	273	4.32315	0.00130462	1	methylcrotonyl-CoA carboxylase alpha chain, mitochondrial / 3-methylcrotonyl-CoA carboxylase 1 (MCCA)
AT1G03090.2	190	202	239	280	308	283	4.38313	0.00793853	1	methylcrotonyl-CoA carboxylase alpha chain, mitochondrial / 3-methylcrotonyl-CoA carboxylase 1 (MCCA)
AT1G03100.1	42	32	28	54	50	42	2.13908	0.053455	1	Pentatricopeptide repeat (PPR) superfamily protein
AT1G03106.1	2	0	0	0	1	1	-1.07394	-0.406626	1	unknown protein
AT1G03110.1	163	174	157	270	260	264	4.43021	0.224199	0.129232	Transducin/WD40 repeat-like superfamily protein
AT1G03120.1	1	4	3	3	5	2	-0.973328	-0.131549	1	responsive to abscisic acid 28
AT1G03130.1	8883	9488	11088	10387	12986	10546	9.9519	-0.256073	0.000177951	photosystem I subunit D-2
AT1G03140.1	338	404	398	541	544	506	5.38752	0.0224763	0.96792	splicing factor Prp18 family protein
AT1G03150.1	157	171	173	207	223	201	4.20388	-0.126376	0.422019	Acyl-CoA N-acyltransferases (NAT) superfamily protein
AT1G03160.1	536	573	664	728	904	813	6.08865	0.00579102	1	FZO-like
AT1G03160.2	516	534	639	699	857	786	6.0186	0.0141813	1	FZO-like
AT1G03170.1	14	12	26	8	6	9	0.975102	-1.61007	0.000394682	Protein of unknown function (DUF3049)
AT1G03180.1	29	33	36	46	41	55	2.04367	0.0797463	0.941761	unknown protein
AT1G03180.2	30	33	41	48	48	60	2.12027	0.12979	0.788525	unknown protein
AT1G03190.1	125	102	123	150	134	141	3.69546	-0.179056	0.381151	RAD3-like DNA-binding helicase protein
AT1G03190.2	122	100	118	139	131	135	3.64668	-0.207285	0.283276	RAD3-like DNA-binding helicase protein
AT1G03200.1	22	27	20	18	21	21	1.01078	-0.658121	0.0701208	unknown protein
AT1G03210.1	93	103	98	172	132	141	3.48071	0.139804	0.577178	Phenazine biosynthesis PhzC/PhzF protein
AT1G03220.1	1246	1445	1303	3384	1881	2578	7.28475	0.52036	0.0310714	Eukaryotic aspartyl protease family protein
AT1G03230.1	216	285	234	611	413	498	4.95523	0.594743	7.34e-05	Eukaryotic aspartyl protease family protein
AT1G03240.1	1	3	2	1	3	1	-1.47212	-0.678664	0.824394	unknown protein
AT1G03250.1	205	209	256	247	315	285	4.73007	-0.119637	0.414463	unknown protein
AT1G03250.2	190	195	245	230	295	270	4.63696	-0.121621	0.434176	unknown protein
AT1G03260.1	63	72	80	97	112	95	3.09684	0.0411822	0.98809	SNARE associated Golgi protein family
AT1G03270.1	28	35	54	73	66	54	2.30195	0.268389	0.383841	CBS domain-containing protein with a domain of unknown function (DUF21)
AT1G03280.1	356	383	486	507	490	481	5.45759	-0.18353	0.0650376	Transcription factor TFIIE, alpha subunit
AT1G03290.1	297	288	342	312	277	308	4.71528	-0.503197	5.16e-06	unknown protein
AT1G03290.2	323	318	361	334	289	323	4.80372	-0.539327	6.1e-07	unknown protein
AT1G03300.1	43	48	43	48	78	62	2.52008	0.026489	1	DOMAIN OF UNKNOWN FUNCTION 724 1
AT1G03310.1	605	641	861	1034	1257	1051	6.4169	0.211171	0.0401985	debranching enzyme 1
AT1G03310.2	608	648	881	1038	1256	1061	6.42757	0.197267	0.0638594	debranching enzyme 1
AT1G03320.1	3	0	4	1	6	1	-1.35293	-0.255571	1	unknown protein
AT1G03330.1	203	213	273	296	283	313	4.76994	-0.0816083	0.662722	Small nuclear ribonucleoprotein family protein
AT1G03340.1	22	23	17	34	32	28	1.49693	0.136885	0.898068	unknown protein
AT1G03350.1	405	440	445	579	532	576	5.48424	-0.0702563	0.642629	BSD domain-containing protein
AT1G03360.1	110	100	140	184	200	178	4.04315	0.225821	0.19441	ribosomal RNA processing 4
AT1G03365.1	189	196	218	282	294	252	4.46474	-0.00138539	1	RING/U-box superfamily protein
AT1G03370.1	284	275	275	372	304	327	4.7223	-0.193648	0.135975	C2 calcium/lipid-binding and GRAM domain containing protein
AT1G03380.1	637	633	649	687	669	626	5.79148	-0.41486	2.12e-07	homolog of yeast autophagy 18 (ATG18) G
AT1G03390.1	0	1	0	0	0	0	-1.48576	-2.06026	1	HXXXD-type acyl-transferase family protein
AT1G03400.1	194	209	248	195	194	176	4.05696	-0.661416	4.68e-10	2-oxoglutarate (2OG) and Fe(II)-dependent oxygenase superfamily protein
AT1G03410.1	254	280	331	340	343	318	5.15949	-0.246192	0.0136161	2-oxoglutarate (2OG) and Fe(II)-dependent oxygenase superfamily protein
AT1G03430.1	145	142	170	150	165	145	4.08638	-0.448793	0.000145981	histidine-containing phosphotransfer factor 5
AT1G03440.1	236	268	324	254	337	290	4.69679	-0.367411	0.000300904	Leucine-rich repeat (LRR) family protein
AT1G03445.1	0	3	1	7	6	5	-1.00806	1.63657	0.105762	Serine/threonine protein phosphatase family protein
AT1G03457.1	78	80	75	90	102	93	3.03792	-0.170193	0.495299	RNA-binding (RRM/RBD/RNP motifs) family protein
AT1G03457.2	77	78	70	86	100	90	3.0028	-0.166901	0.506246	RNA-binding (RRM/RBD/RNP motifs) family protein
AT1G03470.1	21	28	24	39	47	49	2.06625	0.426949	0.149969	Kinase interacting (KIP1-like) family protein
AT1G03470.2	21	29	25	36	46	49	2.05882	0.344941	0.265043	Kinase interacting (KIP1-like) family protein
AT1G03475.1	987	1138	1353	1883	2635	2029	7.34609	0.454332	2.99e-08	Coproporphyrinogen III oxidase
AT1G03490.1	0	0	0	1	0	0	-2.65756	1.72445	1	NAC domain containing protein 6
AT1G03495.1	80	101	118	146	143	149	4.02558	0.0983823	0.772028	HXXXD-type acyl-transferase family protein
AT1G03510.1	9	11	13	17	23	11	0.818897	0.166318	0.958022	Tetratricopeptide repeat (TPR)-like superfamily protein
AT1G03520.1	118	103	126	118	130	111	3.48217	-0.409974	0.00473906	Core-2/I-branching beta-1,6-N-acetylglucosaminyltransferase family protein
AT1G03520.2	88	75	86	83	87	83	3.01252	-0.436563	0.0201784	Core-2/I-branching beta-1,6-N-acetylglucosaminyltransferase family protein
AT1G03530.1	123	129	129	255	264	246	4.35817	0.545498	3.53e-05	nuclear assembly factor 1
AT1G03540.1	14	20	26	37	26	39	1.41387	0.310194	0.420194	Pentatricopeptide repeat (PPR-like) superfamily protein
AT1G03550.1	86	86	84	111	83	118	3.23621	-0.170647	0.564482	Secretory carrier membrane protein (SCAMP) family protein
AT1G03560.1	116	115	137	152	136	127	3.68784	-0.284021	0.114666	Pentatricopeptide repeat (PPR-like) superfamily protein
AT1G03580.1	7	3	2	0	1	3	-0.947017	-1.93614	0.0581319	pseudogene
AT1G03590.1	206	222	290	269	307	277	4.47811	-0.206607	0.1199	Protein phosphatase 2C family protein
AT1G03600.1	3467	3804	4396	4525	5878	4510	8.75535	-0.106315	0.277545	photosystem II family protein
AT1G03610.1	245	293	286	217	285	230	4.59911	-0.63112	1.52e-09	Protein of unknown function (DUF789)
AT1G03620.1	12	26	16	20	20	18	0.83522	-0.353202	0.558648	ELMO/CED-12 family protein
AT1G03630.1	1840	2091	2324	2857	3504	2841	8.00392	0.0976447	0.214662	protochlorophyllide oxidoreductase C
AT1G03630.2	1746	1992	2208	2701	3349	2704	7.9313	0.0986202	0.221986	protochlorophyllide oxidoreductase C
AT1G03650.1	21	13	19	18	23	17	1.11807	-0.330841	0.575994	Acyl-CoA N-acyltransferases (NAT) superfamily protein
AT1G03660.1	8	4	8	8	12	8	-0.452773	0.0229773	1	Ankyrin-repeat containing protein
AT1G03670.1	0	0	1	0	0	1	-2.57506	-0.329835	1	ankyrin repeat family protein
AT1G03680.1	1867	2053	2322	2580	3059	2516	7.92227	-0.073509	0.336489	thioredoxin M-type 1
AT1G03687.1	84	107	125	171	164	174	3.94254	0.2314	0.126061	DTW domain-containing protein
AT1G03687.2	76	103	115	154	154	157	3.78429	0.205527	0.226286	DTW domain-containing protein
AT1G03700.1	11	22	13	54	18	9	0.947417	0.35269	0.691173	Uncharacterised protein family (UPF0497)
AT1G03710.1	3	2	10	0	14	5	-0.510304	-0.111498	1	Cystatin/monellin superfamily protein
AT1G03710.2	3	0	6	0	10	3	-0.768468	0.0647184	1	Cystatin/monellin superfamily protein
AT1G03720.1	1	0	0	0	0	1	-2.57504	-0.335832	1	Cysteine proteinases superfamily protein
AT1G03730.1	38	52	54	70	59	71	2.81619	0.0180054	1	unknown protein
AT1G03740.1	322	318	342	375	337	346	4.91324	-0.351163	0.0013512	Protein kinase superfamily protein
AT1G03740.2	305	304	327	360	324	332	4.8531	-0.340207	0.00251994	Protein kinase superfamily protein
AT1G03750.1	84	74	66	82	83	92	2.89834	-0.263358	0.239881	switch 2
AT1G03760.1	33	62	53	88	72	74	2.89144	0.205611	0.485819	Prefoldin chaperone subunit family protein
AT1G03770.1	71	46	68	95	63	78	2.82523	-0.106122	0.826615	RING 1B
AT1G03770.2	60	39	60	93	60	74	2.69564	0.0569667	0.996854	RING 1B
AT1G03770.3	64	40	62	92	60	75	2.71365	-0.0055353	1	RING 1B
AT1G03780.1	98	79	72	147	168	189	3.53999	0.553725	0.00164443	targeting protein for XKLP2
AT1G03780.2	139	113	115	218	227	237	3.98256	0.431993	0.0024018	targeting protein for XKLP2
AT1G03780.3	134	107	108	208	220	227	3.9001	0.445406	0.0028778	targeting protein for XKLP2
AT1G03790.1	2	1	4	1	1	0	-1.27502	-2.03888	0.381675	Zinc finger C-x8-C-x5-C-x3-H type family protein
AT1G03800.1	0	0	4	6	11	6	-0.870733	1.98457	0.0298852	ERF domain protein 10
AT1G03810.1	0	1	0	0	0	0	-2.71518	-2.05925	1	Nucleic acid-binding, OB-fold-like protein
AT1G03820.1	229	164	235	393	346	336	4.69579	0.315973	0.0226757	unknown protein
AT1G03830.1	94	132	112	225	181	201	4.0323	0.388101	0.00974549	guanylate-binding family protein
AT1G03830.2	98	137	114	235	201	210	4.10005	0.430608	0.00197462	guanylate-binding family protein
AT1G03840.1	35	34	31	69	46	64	1.91654	0.381715	0.252426	C2H2 and C2HC zinc fingers superfamily protein
AT1G03840.2	33	31	29	56	44	61	1.80921	0.333258	0.315087	C2H2 and C2HC zinc fingers superfamily protein
AT1G03850.1	70	84	72	133	75	87	2.9125	-0.0728955	0.959776	Glutaredoxin family protein
AT1G03850.2	93	106	92	167	87	110	3.24928	-0.133982	0.772991	Glutaredoxin family protein
AT1G03860.1	458	499	547	837	843	847	5.95723	0.29196	0.000266489	prohibitin 2
AT1G03860.2	427	467	511	765	802	785	5.86481	0.286208	0.000666142	prohibitin 2
AT1G03860.3	432	469	511	759	780	775	5.85469	0.255495	0.00188676	prohibitin 2
AT1G03870.1	606	643	639	1262	1112	1063	6.14207	0.403486	0.000667132	FASCICLIN-like arabinoogalactan 9
AT1G03880.1	6	0	0	0	0	1	-2.52198	-2.63616	0.279474	cruciferin 2
AT1G03900.1	552	538	653	836	709	789	5.95177	-0.0329372	0.905384	non-intrinsic ABC protein 4
AT1G03905.1	44	33	59	69	44	57	2.122	-0.12675	0.859427	P-loop containing nucleoside triphosphate hydrolases superfamily protein
AT1G03910.1	429	479	526	671	683	673	5.72654	0.0426281	0.780624	unknown protein
AT1G03910.2	453	509	550	704	717	715	5.82786	0.041801	0.787463	unknown protein
AT1G03920.1	51	40	48	58	56	50	2.11811	-0.222761	0.539287	Protein kinase family protein
AT1G03930.1	379	364	497	485	539	481	5.49563	-0.176539	0.0987998	dual specificity kinase 1
AT1G03940.1	80	117	106	135	125	141	3.96483	-0.0502649	0.95483	HXXXD-type acyl-transferase family protein
AT1G03950.1	105	114	115	139	125	132	3.49182	-0.212285	0.237562	vacuolar protein sorting-associated protein 2.3
AT1G03960.1	90	116	117	147	141	132	3.83949	-0.0788998	0.763051	Calcium-binding EF hand family protein
AT1G03960.2	94	115	126	147	137	135	3.8492	-0.134588	0.485949	Calcium-binding EF hand family protein
AT1G03970.1	132	171	188	192	205	191	4.02215	-0.195647	0.209681	G-box binding factor 4
AT1G03980.1	90	99	117	127	141	128	3.38558	-0.0855575	0.769736	phytochelatin synthase 2
AT1G03982.1	0	0	0	0	0	0	-2.71524	0	1	PAK-box/P21-Rho-binding family protein
AT1G03990.1	28	40	41	37	31	34	1.53225	-0.548645	0.0798649	Long-chain fatty alcohol dehydrogenase family protein
AT1G04000.1	76	78	89	92	85	104	3.32716	-0.247035	0.221971	unknown protein
AT1G04010.1	101	125	119	170	148	131	3.60871	-0.0784206	0.768171	phospholipid sterol acyl transferase 1
AT1G04020.1	119	133	172	219	244	207	4.05665	0.203114	0.161018	breast cancer associated RING 1
AT1G04020.2	120	133	166	218	240	206	4.06657	0.206963	0.159257	breast cancer associated RING 1
AT1G04030.1	124	126	121	269	212	239	3.93082	0.498074	0.000272533	unknown protein
AT1G04040.1	548	558	498	1394	1078	1192	6.0556	0.72908	4.66e-08	HAD superfamily, subfamily IIIB acid phosphatase
AT1G04050.1	48	51	42	63	62	70	2.62374	0.00787886	1	homolog of SU(var)3-9 1
AT1G04070.1	78	72	68	112	76	90	3.10223	-0.10864	0.750664	translocase of outer membrane 22-I
AT1G04080.1	926	999	1129	1385	1398	1354	6.88289	-0.018574	0.95585	Tetratricopeptide repeat (TPR)-like superfamily protein
AT1G04080.2	693	748	843	1013	992	954	6.47687	-0.0832464	0.359168	Tetratricopeptide repeat (TPR)-like superfamily protein
AT1G04080.3	920	998	1117	1387	1389	1352	6.87703	-0.012746	1	Tetratricopeptide repeat (TPR)-like superfamily protein
AT1G04090.1	10	10	6	15	13	11	-0.143755	0.121811	1	Plant protein of unknown function (DUF946)
AT1G04100.1	18	55	36	35	29	38	1.93192	-0.542605	0.161719	indoleacetic acid-induced protein 10
AT1G04110.1	37	48	60	109	148	136	2.87314	0.981609	2.07e-07	Subtilase family protein
AT1G04120.1	937	1135	1189	1761	1508	1568	6.79415	0.115822	0.34319	multidrug resistance-associated protein 5
AT1G04120.2	917	1111	1172	1731	1469	1544	6.75774	0.115555	0.34951	multidrug resistance-associated protein 5
AT1G04130.1	96	95	91	122	145	125	3.44544	0.0135766	1	Tetratricopeptide repeat (TPR)-like superfamily protein
AT1G04140.1	808	876	989	1238	1215	1135	6.54421	-0.0321817	0.835675	Transducin family protein / WD-40 repeat family protein
AT1G04140.2	777	865	970	1202	1181	1097	6.49965	-0.042613	0.747749	Transducin family protein / WD-40 repeat family protein
AT1G04150.1	5	3	6	8	4	10	-0.301592	0.194364	0.955362	C2 calcium/lipid-binding plant phosphoribosyltransferase family protein
AT1G04160.1	142	165	199	253	234	243	4.30285	0.0729746	0.678845	myosin XI B
AT1G04170.1	896	987	1044	1769	1807	1661	6.99632	0.380692	4.98e-10	eukaryotic translation initiation factor 2 gamma subunit
AT1G04180.1	14	16	25	48	13	33	0.852487	0.336087	0.623669	YUCCA 9
AT1G04190.1	310	307	356	471	406	463	5.31336	0.00638987	1	Tetratricopeptide repeat (TPR)-like superfamily protein
AT1G04200.1	222	252	263	372	366	342	4.81967	0.0930956	0.496545	unknown protein
AT1G04210.1	523	549	626	768	833	780	5.98316	0.0299685	0.875711	Leucine-rich repeat protein kinase family protein
AT1G04220.1	208	250	225	391	225	202	4.46067	-0.199613	0.447822	3-ketoacyl-CoA synthase 2
AT1G04230.1	96	99	122	123	129	146	3.46748	-0.128422	0.559031	Protein of unknown function (DUF2361)
AT1G04240.1	226	207	268	274	285	238	4.92773	-0.273641	0.0411762	AUX/IAA transcriptional regulator family protein
AT1G04250.1	529	524	618	1001	904	879	6.08517	0.279682	0.00972392	AUX/IAA transcriptional regulator family protein
AT1G04260.1	83	95	87	157	131	122	3.51003	0.169932	0.467071	CAMV movement protein interacting protein 7
AT1G04270.1	2272	2581	2713	4588	4628	4589	8.3984	0.411295	5.2e-14	cytosolic ribosomal protein S15
AT1G04270.2	1908	2177	2267	3868	3892	3802	8.14501	0.407249	5.72e-14	cytosolic ribosomal protein S15
AT1G04280.1	278	323	278	469	320	370	4.8048	-0.0595632	0.880236	P-loop containing nucleoside triphosphate hydrolases superfamily protein
AT1G04290.1	206	206	219	290	302	259	4.55381	-0.0290069	0.957527	Thioesterase superfamily protein
AT1G04300.1	546	569	640	748	768	716	5.97015	-0.111238	0.261529	TRAF-like superfamily protein
AT1G04300.2	524	556	627	713	754	701	5.93884	-0.112894	0.249245	TRAF-like superfamily protein
AT1G04300.3	533	560	632	730	756	705	5.95161	-0.112891	0.247625	TRAF-like superfamily protein
AT1G04300.4	531	554	624	726	751	699	5.93225	-0.109564	0.275357	TRAF-like superfamily protein
AT1G04310.1	60	88	60	94	70	78	2.77313	-0.240777	0.463105	ethylene response sensor 2
AT1G04330.1	13	17	12	16	15	13	0.57381	-0.389849	0.502722	unknown protein
AT1G04340.1	144	143	153	231	197	244	4.10381	0.154611	0.377275	HR-like lesion-inducing protein-related
AT1G04350.1	683	690	842	708	836	680	6.11592	-0.453102	8.91e-10	2-oxoglutarate (2OG) and Fe(II)-dependent oxygenase superfamily protein
AT1G04360.1	38	42	33	66	39	56	2.16969	0.0527036	1	RING/U-box superfamily protein
AT1G04370.1	0	0	1	3	2	1	-1.99019	1.83301	0.450887	Ethylene-responsive element binding factor 14
AT1G04380.1	0	3	0	4	3	1	-1.64375	0.885682	0.803187	2-oxoglutarate (2OG) and Fe(II)-dependent oxygenase superfamily protein
AT1G04390.1	89	118	117	140	140	113	3.54503	-0.179633	0.38214	BTB/POZ domain-containing protein
AT1G04400.1	1160	1206	1396	1376	1392	1312	6.85817	-0.339926	2.03e-07	cryptochrome 2
AT1G04400.2	1102	1126	1316	1295	1301	1249	6.78345	-0.339259	2.78e-07	cryptochrome 2
AT1G04410.1	4505	4846	5233	9714	8806	8496	9.22402	0.432169	6.12e-13	Lactate/malate dehydrogenase family protein
AT1G04420.1	825	939	1149	1294	1754	1299	6.72707	0.119381	0.317632	NAD(P)-linked oxidoreductase superfamily protein
AT1G04430.1	760	994	1090	1669	1538	1432	6.82935	0.253622	0.00205395	S-adenosyl-L-methionine-dependent methyltransferases superfamily protein
AT1G04430.2	727	940	1042	1604	1466	1361	6.76927	0.257516	0.00171581	S-adenosyl-L-methionine-dependent methyltransferases superfamily protein
AT1G04440.1	461	510	555	696	585	580	5.61756	-0.16978	0.117299	casein kinase like 13
AT1G04445.1	1	0	0	0	1	3	-2.42287	1.2943	0.643136	C2H2-like zinc finger protein
AT1G04457.1	19	14	17	25	45	31	1.18983	0.5497	0.141455	pseudogene
AT1G04470.1	0	0	0	0	0	0	-2.62963	0	1	Protein of unknown function (DUF810)
AT1G04480.1	991	1122	1286	2029	2129	2124	7.31501	0.43237	2.87e-10	Ribosomal protein L14p/L23e family protein
AT1G04490.1	17	19	10	22	16	22	0.61976	-0.0776437	1	Protein of unknown function (DUF3527)
AT1G04490.2	17	19	10	21	16	23	0.645601	-0.0772743	1	Protein of unknown function (DUF3527)
AT1G04500.1	0	0	1	4	5	2	-1.85384	2.66024	0.0517081	CCT motif family protein
AT1G04510.1	450	553	591	765	834	886	6.0474	0.187023	0.053193	MOS4-associated complex 3A
AT1G04510.2	438	542	578	744	821	871	6.01574	0.19135	0.0525742	MOS4-associated complex 3A
AT1G04520.1	213	258	311	415	405	426	4.95084	0.21832	0.0359617	plasmodesmata-located protein 2
AT1G04530.1	1192	1191	1390	1121	1420	1139	6.6827	-0.497674	1.86e-10	Tetratricopeptide repeat (TPR)-like superfamily protein
AT1G04540.1	32	41	52	61	43	47	1.92719	-0.180516	0.686408	Calcium-dependent lipid-binding (CaLB domain) family protein
AT1G04550.1	263	234	266	285	335	291	4.82026	-0.205551	0.0813891	AUX/IAA transcriptional regulator family protein
AT1G04550.2	308	283	334	347	400	352	5.06682	-0.21149	0.0489127	AUX/IAA transcriptional regulator family protein
AT1G04555.1	38	44	61	48	54	53	2.20417	-0.339651	0.188686	unknown protein
AT1G04560.1	2	1	1	0	4	0	-0.921538	-0.450922	0.964549	AWPM-19-like family protein
AT1G04570.1	19	27	32	35	32	26	1.75701	-0.202871	0.714333	Major facilitator superfamily protein
AT1G04580.1	0	1	12	1	2	1	-1.7295	-1.99563	0.135236	aldehyde oxidase 4
AT1G04590.1	204	196	252	285	312	321	4.77794	0.0374143	0.917622	unknown protein
AT1G04590.2	186	180	230	273	289	301	4.67387	0.0778286	0.67348	unknown protein
AT1G04600.1	10	11	13	9	12	11	0.114329	-0.53965	0.387031	myosin XI A
AT1G04610.1	33	28	17	48	31	62	1.47581	0.391111	0.392667	YUCCA 3
AT1G04620.1	105	118	122	215	241	196	3.63845	0.458508	0.000201023	coenzyme F420 hydrogenase family / dehydrogenase, beta subunit family
AT1G04625.1	0	2	0	3	1	0	-1.83835	0.475188	1	Polynucleotidyl transferase, ribonuclease H-like superfamily protein
AT1G04630.1	355	322	341	506	510	505	5.40144	0.11822	0.341441	GRIM-19 protein
AT1G04635.1	26	22	21	34	32	30	1.64678	0.0157687	1	ribonuclease P family protein / Rpp14 family protein
AT1G04640.1	203	236	284	325	402	306	4.73949	0.0566706	0.789677	lipoyltransferase 2
AT1G04640.2	166	206	232	272	326	246	4.50475	0.0243263	1	lipoyltransferase 2
AT1G04645.1	0	0	0	0	0	0	-2.22199	0	1	Plant self-incompatibility protein S1 family
AT1G04650.1	49	52	41	65	61	57	2.78517	-0.0939104	0.837928	unknown protein
AT1G04660.1	1	5	6	8	11	4	-0.504851	0.470798	0.693587	glycine-rich protein
AT1G04670.1	0	0	0	0	0	0	-2.62964	0	1	unknown protein
AT1G04680.1	703	721	820	1430	1393	1294	6.55968	0.417467	5.83e-10	Pectin lyase-like superfamily protein
AT1G04690.1	779	820	914	1150	1038	1009	6.47467	-0.10968	0.266725	potassium channel beta subunit 1
AT1G04700.1	24	30	27	51	42	40	1.67558	0.256059	0.489968	PB1 domain-containing protein tyrosine kinase
AT1G04710.1	246	245	318	379	400	391	5.01851	0.0758367	0.582484	peroxisomal 3-ketoacyl-CoA thiolase 4
AT1G04730.1	78	87	90	126	126	120	3.41066	0.0862913	0.750664	P-loop containing nucleoside triphosphate hydrolases superfamily protein
AT1G04750.1	674	697	787	888	832	888	6.27507	-0.182682	0.0259772	vesicle-associated membrane protein 721
AT1G04750.2	515	508	583	658	647	663	5.89009	-0.164177	0.0642245	vesicle-associated membrane protein 721
AT1G04760.1	11	20	23	28	32	16	1.21866	0.0345966	1	vesicle-associated membrane protein 726
AT1G04770.1	265	309	286	405	437	514	5.14047	0.200381	0.17186	Tetratricopeptide repeat (TPR)-like superfamily protein
AT1G04778.1	2	2	2	5	2	1	-0.964359	-0.0415002	1	unknown protein
AT1G04780.1	453	480	538	588	517	578	5.50359	-0.260364	0.0108728	Ankyrin repeat family protein
AT1G04790.1	201	241	232	295	294	283	4.66227	-0.0868027	0.557835	RING/U-box superfamily protein
AT1G04800.1	415	443	534	583	751	752	5.71919	0.129638	0.471603	glycine-rich protein
AT1G04810.1	500	573	608	867	813	876	5.92148	0.150102	0.182528	26S proteasome regulatory complex, non-ATPase subcomplex, Rpn2/Psmd1 subunit
AT1G04820.1	3558	3775	4004	6292	5873	5835	9.06866	0.209037	0.000991279	tubulin alpha-4 chain
AT1G04830.1	150	160	172	189	176	184	4.0179	-0.269554	0.0594325	Ypt/Rab-GAP domain of gyp1p superfamily protein
AT1G04830.2	139	142	150	180	157	169	3.86008	-0.226388	0.145495	Ypt/Rab-GAP domain of gyp1p superfamily protein
AT1G04840.1	7	5	11	14	6	11	0.628276	-0.0187419	1	Tetratricopeptide repeat (TPR)-like superfamily protein
AT1G04850.1	818	849	1031	1417	1219	1310	6.65445	0.0961348	0.391217	ubiquitin-associated (UBA)/TS-N domain-containing protein
AT1G04860.1	344	400	403	566	587	555	5.40996	0.116097	0.230119	ubiquitin-specific protease 2
AT1G04870.1	229	232	255	443	366	435	5.00959	0.341514	0.00218834	protein arginine methyltransferase 10
AT1G04870.2	245	250	268	470	389	456	5.08686	0.329438	0.00356848	protein arginine methyltransferase 10
AT1G04880.1	8	5	2	10	14	13	-0.0678622	0.824459	0.229028	HMG (high mobility group) box protein with ARID/BRIGHT DNA-binding domain
AT1G04900.1	104	100	108	192	156	161	3.79101	0.247558	0.135692	Protein of unknown function (DUF185)
AT1G04910.1	291	281	301	397	352	362	4.91989	-0.111041	0.377582	O-fucosyltransferase family protein
AT1G04920.1	28	30	42	31	39	26	1.57666	-0.51503	0.0769993	sucrose phosphate synthase 3F
AT1G04930.1	25	25	26	54	42	36	2.08007	0.336288	0.322017	hydroxyproline-rich glycoprotein family protein
AT1G04930.2	19	24	25	48	39	33	1.98649	0.35973	0.283821	hydroxyproline-rich glycoprotein family protein
AT1G04940.1	393	483	526	740	867	726	6.01927	0.277036	0.0013424	translocon at the inner envelope membrane of chloroplasts 20
AT1G04945.1	47	74	55	88	97	89	3.02005	0.17913	0.524955	HIT-type Zinc finger family protein
AT1G04945.2	50	82	59	102	106	96	3.19244	0.211109	0.367962	HIT-type Zinc finger family protein
AT1G04945.3	361	450	458	675	783	670	5.89193	0.287204	0.000937312	HIT-type Zinc finger family protein
AT1G04950.1	194	213	223	245	262	235	4.50426	-0.222613	0.0431106	TATA BOX ASSOCIATED FACTOR II 59
AT1G04950.2	195	217	224	249	268	236	4.51171	-0.215219	0.0534782	TATA BOX ASSOCIATED FACTOR II 59
AT1G04950.3	194	213	223	248	264	236	4.52127	-0.211029	0.0599423	TATA BOX ASSOCIATED FACTOR II 59
AT1G04960.1	203	243	235	272	274	251	4.46357	-0.231845	0.0581155	Protein of unknown function (DUF1664)
AT1G04960.2	192	228	226	258	255	242	4.40256	-0.233175	0.0672273	Protein of unknown function (DUF1664)
AT1G04970.1	314	329	393	447	365	360	4.98527	-0.277614	0.00779088	lipid-binding serum glycoprotein family protein
AT1G04970.2	245	254	305	344	294	278	4.6628	-0.268546	0.0132482	lipid-binding serum glycoprotein family protein
AT1G04980.1	131	147	130	277	238	252	4.17419	0.451265	0.00134533	PDI-like 2-2
AT1G04985.1	178	230	255	341	317	299	4.81128	0.0735251	0.641051	unknown protein
AT1G04990.1	119	137	143	255	217	215	3.98048	0.326846	0.0299105	Zinc finger C-x8-C-x5-C-x3-H type family protein
AT1G04990.2	114	131	135	238	207	201	3.91444	0.307871	0.0443316	Zinc finger C-x8-C-x5-C-x3-H type family protein
AT1G05000.1	106	112	95	175	70	108	3.1562	-0.283179	0.442984	Phosphotyrosine protein phosphatases superfamily protein
AT1G05000.2	96	99	89	161	63	99	3.05242	-0.269709	0.467446	Phosphotyrosine protein phosphatases superfamily protein
AT1G05010.1	1594	1465	1769	1999	2269	2214	7.42722	-0.0339535	0.910707	ethylene-forming enzyme
AT1G05020.1	5	6	4	5	12	9	0.30795	0.327222	0.871094	ENTH/ANTH/VHS superfamily protein
AT1G05030.1	111	112	122	148	148	120	3.75322	-0.189197	0.249097	Major facilitator superfamily protein
AT1G05040.1	0	0	0	0	0	0	-2.60212	0	1	unknown protein
AT1G05040.2	0	0	0	0	0	0	-2.57519	0	1	unknown protein
AT1G05055.1	112	134	134	183	218	195	4.00413	0.190547	0.169368	general transcription factor II H2
AT1G05060.1	129	163	127	175	134	155	4.05902	-0.311916	0.131083	unknown protein
AT1G05061.1	3	4	1	10	3	5	-0.74484	0.689401	0.591161	pseudogene
AT1G05065.1	9	3	5	8	5	4	-0.335512	-0.451698	0.663541	CLAVATA3/ESR-RELATED 20
AT1G05070.1	142	152	196	180	182	220	4.37593	-0.204172	0.214651	Protein of unknown function (DUF1068)
AT1G05080.1	0	0	0	0	0	0	-2.68619	0	1	F-box/RNI-like/FBD-like domains-containing protein
AT1G05090.1	239	273	300	328	318	317	4.81985	-0.210753	0.0503536	dentin sialophosphoprotein-related
AT1G05100.1	5	22	13	13	11	12	0.503111	-0.596006	0.392759	mitogen-activated protein kinase kinase kinase 18
AT1G05120.1	246	301	345	364	327	342	4.86464	-0.240628	0.0622101	Helicase protein with RING/U-box domain
AT1G05135.1	17	33	33	29	64	49	2.34324	0.316343	0.396113	pseudogene
AT1G05136.1	0	0	0	0	0	0	-2.68618	0	1	unknown protein
AT1G05140.1	565	714	769	749	949	779	6.17552	-0.182983	0.0507779	Peptidase M50 family protein
AT1G05150.1	420	396	481	635	688	574	5.47775	0.088413	0.486082	Calcium-binding tetratricopeptide family protein
AT1G05160.1	80	93	119	112	122	136	3.54603	-0.11305	0.667665	cytochrome P450, family 88, subfamily A, polypeptide 3
AT1G05170.1	186	240	253	297	325	268	4.7544	-0.0674581	0.715276	Galactosyltransferase family protein
AT1G05170.2	194	241	261	311	324	272	4.76951	-0.0756728	0.652277	Galactosyltransferase family protein
AT1G05180.1	277	304	311	449	396	444	5.12172	0.0746211	0.64018	NAD(P)-binding Rossmann-fold superfamily protein
AT1G05180.2	231	274	275	384	355	392	4.94559	0.0797023	0.592106	NAD(P)-binding Rossmann-fold superfamily protein
AT1G05180.3	220	259	257	359	343	381	4.86379	0.100517	0.466669	NAD(P)-binding Rossmann-fold superfamily protein
AT1G05190.1	2371	2630	3142	3440	4755	3561	8.31665	0.0701886	0.605835	Ribosomal protein L6 family
AT1G05200.1	353	378	480	541	534	466	5.69184	-0.108084	0.365266	glutamate receptor 3.4
AT1G05200.2	358	379	487	549	546	482	5.71109	-0.0899401	0.488045	glutamate receptor 3.4
AT1G05205.1	117	154	157	279	241	264	4.34369	0.41769	0.000508384	unknown protein
AT1G05210.1	37	45	38	95	57	69	2.53607	0.423147	0.107814	Transmembrane protein 97, predicted
AT1G05220.1	4	6	4	18	6	10	-0.392545	0.809708	0.245465	Transmembrane protein 97, predicted
AT1G05220.2	8	17	13	24	20	21	0.861903	0.314421	0.578594	Transmembrane protein 97, predicted
AT1G05230.1	187	169	210	204	294	250	4.44109	-0.0585832	0.859233	homeodomain GLABROUS 2
AT1G05230.2	191	178	211	212	301	256	4.47347	-0.0541339	0.864183	homeodomain GLABROUS 2
AT1G05230.3	183	165	204	191	291	239	4.39316	-0.0763372	0.765235	homeodomain GLABROUS 2
AT1G05230.4	188	176	211	212	299	258	4.47276	-0.0411232	0.934573	homeodomain GLABROUS 2
AT1G05240.1	102	103	65	256	214	375	3.59104	1.18302	2.87e-05	Peroxidase superfamily protein
AT1G05250.1	103	103	66	256	214	375	3.59267	1.1725	3.41e-05	Peroxidase superfamily protein
AT1G05260.1	322	313	255	708	361	589	5.29893	0.438012	0.0623419	Peroxidase superfamily protein
AT1G05270.1	297	288	311	385	367	388	4.9207	-0.111078	0.41591	TraB family protein
AT1G05280.1	21	19	18	50	27	37	1.02561	0.515086	0.166351	Protein of unknown function (DUF604)
AT1G05300.1	39	44	51	90	78	64	2.47716	0.333534	0.252763	zinc transporter 5 precursor
AT1G05300.2	37	43	43	76	68	58	2.31353	0.255895	0.467088	zinc transporter 5 precursor
AT1G05310.1	86	76	99	101	95	87	3.0678	-0.340974	0.134984	Pectin lyase-like superfamily protein
AT1G05320.1	308	309	320	477	416	468	5.17141	0.080814	0.679685	unknown protein
AT1G05320.2	305	306	317	464	411	466	5.15699	0.0734893	0.722227	unknown protein
AT1G05320.3	306	307	319	470	420	471	5.16951	0.0885349	0.631814	unknown protein
AT1G05330.1	0	0	1	0	1	0	-2.04476	-0.333942	1	unknown protein
AT1G05340.1	84	97	75	109	56	73	2.89484	-0.564605	0.128407	unknown protein
AT1G05350.1	245	215	245	390	335	396	4.82984	0.211589	0.135392	NAD(P)-binding Rossmann-fold superfamily protein
AT1G05360.1	169	231	230	241	243	258	4.4299	-0.218655	0.115981	unknown protein
AT1G05370.1	12	12	16	23	33	24	0.916522	0.537457	0.205637	Sec14p-like phosphatidylinositol transfer family protein
AT1G05380.1	381	416	465	573	522	586	5.49008	-0.040284	0.883954	Acyl-CoA N-acyltransferase with RING/FYVE/PHD-type zinc finger protein
AT1G05380.2	385	421	469	577	524	590	5.50091	-0.0465232	0.843856	Acyl-CoA N-acyltransferase with RING/FYVE/PHD-type zinc finger protein
AT1G05385.1	168	151	203	188	285	211	4.35348	-0.0714268	0.808904	photosystem II 11 kDa protein-related
AT1G05400.1	6	8	3	7	8	5	-0.353104	-0.222702	0.953636	unknown protein
AT1G05400.2	5	7	3	7	8	4	-0.447713	-0.118021	1	unknown protein
AT1G05410.1	130	140	159	185	200	192	4.09888	-0.0302859	0.987424	Protein of unknown function (DUF1423)
AT1G05410.2	119	134	146	176	184	177	4.00502	-0.0293661	0.997916	Protein of unknown function (DUF1423)
AT1G05420.1	7	9	5	16	17	10	0.466405	0.565676	0.379579	ovate family protein 12
AT1G05430.1	228	274	280	322	323	300	4.75199	-0.18476	0.0906306	unknown protein
AT1G05440.1	22	24	36	33	30	35	1.60474	-0.197581	0.69399	C-8 sterol isomerases
AT1G05450.1	2	1	4	2	3	4	-1.37564	-0.0895585	1	Bifunctional inhibitor/lipid-transfer protein/seed storage 2S albumin superfamily protein
AT1G05450.2	6	6	6	6	7	6	-0.398733	-0.374055	0.777227	Bifunctional inhibitor/lipid-transfer protein/seed storage 2S albumin superfamily protein
AT1G05460.1	151	169	159	191	228	227	4.10403	-0.0280513	0.985736	P-loop containing nucleoside triphosphate hydrolases superfamily protein
AT1G05470.1	130	135	155	189	215	189	4.10333	0.0389964	0.938516	DNAse I-like superfamily protein
AT1G05490.1	18	8	21	10	12	23	0.848134	-0.512438	0.34108	chromatin remodeling 31
AT1G05500.1	417	473	490	710	679	634	5.7107	0.0936816	0.388545	Calcium-dependent lipid-binding (CaLB domain) family protein
AT1G05510.1	0	0	0	0	0	0	-2.12086	0	1	Protein of unknown function (DUF1264)
AT1G05520.1	374	416	480	621	554	558	5.48362	-0.00607662	1	Sec23/Sec24 protein transport family protein
AT1G05530.1	16	16	15	56	27	35	0.836626	0.86753	0.023457	UDP-glucosyl transferase 75B2
AT1G05540.1	67	63	84	96	102	101	2.88898	0.026199	1	Protein of unknown function (DUF295)
AT1G05550.1	5	6	2	8	6	3	-1.01699	-0.074541	1	Protein of unknown function (DUF295)
AT1G05550.2	4	6	2	8	6	3	-1.04458	0.0388791	1	Protein of unknown function (DUF295)
AT1G05550.3	3	7	2	7	6	4	-1.02613	0.0395508	1	Protein of unknown function (DUF295)
AT1G05560.1	477	852	1030	681	767	612	5.88717	-0.63631	0.000457375	UDP-glucosyltransferase 75B1
AT1G05570.1	490	547	541	754	646	788	5.6884	0.0170086	1	callose synthase 1
AT1G05570.2	478	538	533	736	629	762	5.65547	0.00310472	1	callose synthase 1
AT1G05575.1	9	12	11	10	10	6	-0.149377	-0.749444	0.224361	unknown protein
AT1G05577.1	4	1	6	3	3	4	-0.707859	-0.573977	0.643303	Domain of unknown function (DUF966)
AT1G05590.1	174	145	160	225	237	209	4.25858	0.0247993	1	beta-hexosaminidase 2
AT1G05600.1	41	79	76	73	95	75	3.00142	-0.144979	0.695947	Tetratricopeptide repeat (TPR)-like superfamily protein
AT1G05600.2	44	81	80	74	96	80	3.04714	-0.168483	0.582418	Tetratricopeptide repeat (TPR)-like superfamily protein
AT1G05610.1	9	3	13	11	8	13	-0.0172314	-0.0937483	1	ADP-glucose pyrophosphorylase small subunit 2
AT1G05620.1	165	165	170	312	216	256	4.27855	0.192155	0.30638	uridine-ribohydrolase 2
AT1G05620.2	151	140	153	278	192	228	4.12181	0.195648	0.316338	uridine-ribohydrolase 2
AT1G05630.1	173	214	265	250	293	282	4.46282	-0.11423	0.497508	Endonuclease/exonuclease/phosphatase family protein
AT1G05630.2	174	216	263	252	292	276	4.45951	-0.126145	0.40732	Endonuclease/exonuclease/phosphatase family protein
AT1G05640.1	27	19	35	47	27	52	1.66385	0.187606	0.708637	Ankyrin repeat family protein
AT1G05650.1	30	14	16	92	46	49	1.94744	1.16481	0.00404751	Pectin lyase-like superfamily protein
AT1G05660.1	59	48	42	150	72	103	2.52937	0.66077	0.0796982	Pectin lyase-like superfamily protein
AT1G05670.1	81	120	121	95	140	132	3.5472	-0.267018	0.154596	Pentatricopeptide repeat (PPR-like) superfamily protein
AT1G05670.2	80	121	118	95	139	131	3.51827	-0.261702	0.166894	Pentatricopeptide repeat (PPR-like) superfamily protein
AT1G05675.1	1	11	3	2	2	1	-1.38683	-1.95481	0.102808	UDP-Glycosyltransferase superfamily protein
AT1G05680.1	118	373	441	220	125	96	3.75959	-1.50272	3.37e-05	Uridine diphosphate glycosyltransferase 74E2
AT1G05690.1	77	62	72	53	75	83	2.81247	-0.459455	0.0377602	BTB and TAZ domain protein 3
AT1G05700.1	30	43	35	33	25	57	1.56411	-0.352433	0.541582	Leucine-rich repeat transmembrane protein kinase protein
AT1G05710.1	72	75	74	93	98	69	2.79109	-0.226004	0.292369	basic helix-loop-helix (bHLH) DNA-binding superfamily protein
AT1G05710.2	85	90	91	122	131	107	3.03383	-0.0226686	1	basic helix-loop-helix (bHLH) DNA-binding superfamily protein
AT1G05710.3	89	93	94	125	134	107	3.09784	-0.0521411	0.898649	basic helix-loop-helix (bHLH) DNA-binding superfamily protein
AT1G05710.4	71	73	72	89	99	67	2.75097	-0.221412	0.302773	basic helix-loop-helix (bHLH) DNA-binding superfamily protein
AT1G05710.5	82	87	81	110	122	95	2.99293	-0.0727701	0.824226	basic helix-loop-helix (bHLH) DNA-binding superfamily protein
AT1G05720.1	160	180	181	244	184	227	4.25404	-0.125203	0.509157	selenoprotein family protein
AT1G05730.1	48	41	40	82	58	69	2.36325	0.236313	0.460934	Eukaryotic protein of unknown function (DUF842)
AT1G05740.1	0	0	0	0	0	0	-2.57517	0	1	Eukaryotic protein of unknown function (DUF842)
AT1G05750.1	62	59	80	115	108	94	3.17135	0.199144	0.356055	Tetratricopeptide repeat (TPR)-like superfamily protein
AT1G05760.1	28	26	37	45	45	39	1.86814	0.045469	1	Mannose-binding lectin superfamily protein
AT1G05770.1	6	20	13	13	21	17	0.500068	-0.0696043	1	Mannose-binding lectin superfamily protein
AT1G05780.1	39	41	46	58	52	58	2.20608	-0.0417931	1	Vacuolar ATPase assembly integral membrane protein VMA21-like domain
AT1G05785.1	53	65	63	62	61	63	2.71836	-0.417966	0.0444499	Got1/Sft2-like vescicle transport protein family
AT1G05785.2	48	63	56	58	59	60	2.62803	-0.373633	0.101342	Got1/Sft2-like vescicle transport protein family
AT1G05790.1	185	167	226	215	252	223	4.27472	-0.202422	0.12326	lipase class 3 family protein
AT1G05790.2	207	186	249	246	283	248	4.44563	-0.182849	0.177837	lipase class 3 family protein
AT1G05805.1	186	159	172	213	190	165	4.30829	-0.326192	0.0154547	basic helix-loop-helix (bHLH) DNA-binding superfamily protein
AT1G05810.1	40	32	50	82	57	57	2.27797	0.228527	0.534801	RAB GTPase homolog A5E
AT1G05820.1	18	34	33	31	35	31	1.73074	-0.265738	0.518116	SIGNAL PEPTIDE PEPTIDASE-LIKE 5
AT1G05820.2	21	33	40	35	38	31	1.8764	-0.309833	0.403601	SIGNAL PEPTIDE PEPTIDASE-LIKE 5
AT1G05830.1	401	428	496	466	526	514	5.53097	-0.271691	0.00477796	trithorax-like protein 2
AT1G05830.2	390	417	471	453	513	499	5.48386	-0.260069	0.00812178	trithorax-like protein 2
AT1G05835.1	92	105	123	120	189	153	3.97266	0.0710823	0.872634	PHD finger protein
AT1G05840.1	200	195	209	229	209	204	4.25959	-0.371168	0.00223473	Eukaryotic aspartyl protease family protein
AT1G05850.1	3665	3904	4304	5585	5793	5304	8.92259	0.0321766	0.724372	Chitinase family protein
AT1G05860.1	79	76	89	111	88	93	3.18279	-0.198549	0.346068	unknown protein
AT1G05870.1	280	318	388	353	432	386	5.25849	-0.207067	0.106354	Protein of unknown function (DUF1685)
AT1G05870.2	351	388	463	398	507	435	5.53794	-0.300089	0.0070625	Protein of unknown function (DUF1685)
AT1G05870.3	325	341	412	360	459	399	5.37446	-0.28143	0.0168309	Protein of unknown function (DUF1685)
AT1G05870.4	320	350	421	369	459	406	5.39707	-0.278751	0.0158319	Protein of unknown function (DUF1685)
AT1G05880.1	4	9	12	15	4	11	0.391488	-0.17362	1	RING/U-box superfamily protein
AT1G05880.2	4	9	12	17	5	12	0.451839	0.00432638	1	RING/U-box superfamily protein
AT1G05890.1	592	632	706	748	655	587	5.97562	-0.413638	6.3e-07	RING/U-box superfamily protein
AT1G05890.2	577	602	679	725	630	576	5.92356	-0.402195	2.27e-06	RING/U-box superfamily protein
AT1G05894.1	9	5	2	9	3	7	-0.535265	-0.212076	0.95844	unknown protein
AT1G05900.1	202	205	232	189	230	181	4.31462	-0.550091	7.03e-08	endonuclease III 2
AT1G05900.2	214	211	244	193	235	193	4.387	-0.566522	1.58e-08	endonuclease III 2
AT1G05910.1	340	404	394	549	516	522	5.43828	0.0222755	0.974272	cell division cycle protein 48-related / CDC48-related
AT1G05920.1	0	0	0	0	0	0	-2.62964	0	1	Domain of unknown function (DUF313)
AT1G05930.1	0	0	0	0	0	0	-2.68617	0	1	Domain of unknown function (DUF313)
AT1G05940.1	296	420	425	502	584	489	5.42539	0.00831802	1	cationic amino acid transporter 9
AT1G05950.1	56	48	63	60	77	54	2.96977	-0.265661	0.279702	unknown protein
AT1G05960.1	475	519	556	797	733	729	5.8053	0.0865555	0.532709	ARM repeat superfamily protein
AT1G05960.2	461	506	551	778	716	718	5.77909	0.0870277	0.532354	ARM repeat superfamily protein
AT1G05970.1	36	42	55	49	63	57	2.37401	-0.111819	0.78214	RNA-binding (RRM/RBD/RNP motifs) family protein
AT1G05970.2	39	45	55	48	65	57	2.43426	-0.16704	0.608011	RNA-binding (RRM/RBD/RNP motifs) family protein
AT1G05990.1	0	3	0	2	3	3	-1.9545	0.886954	0.813163	EF hand calcium-binding protein family
AT1G06000.1	712	743	824	1492	1333	1442	6.69261	0.449723	9.87e-08	UDP-Glycosyltransferase superfamily protein
AT1G06010.1	68	67	92	111	97	110	3.39283	0.0311612	1	unknown protein
AT1G06020.1	5	4	2	4	7	2	-0.846234	-0.215116	1	pfkB-like carbohydrate kinase family protein
AT1G06030.1	3	0	2	4	0	2	-1.6715	-0.180942	1	pfkB-like carbohydrate kinase family protein
AT1G06040.1	2331	2446	2685	2770	2884	2487	8.02954	-0.33448	1.75e-11	B-box zinc finger family protein
AT1G06040.2	2196	2291	2531	2617	2727	2316	7.9384	-0.334071	7.49e-11	B-box zinc finger family protein
AT1G06050.1	40	47	57	69	50	59	2.3598	-0.149063	0.736816	Protein of unknown function (DUF1336)
AT1G06060.1	133	141	169	164	164	178	3.93964	-0.26512	0.0444636	LisH and RanBPM domains containing protein
AT1G06070.1	153	190	184	209	201	203	4.18587	-0.239319	0.080575	Basic-leucine zipper (bZIP) transcription factor family protein
AT1G06080.1	199	142	184	198	170	196	4.07835	-0.357537	0.201905	delta 9 desaturase 1
AT1G06090.1	133	150	120	298	160	218	3.80834	0.287535	0.479329	Fatty acid desaturase family protein
AT1G06100.1	25	24	38	37	38	32	1.67542	-0.155422	0.84252	Fatty acid desaturase family protein
AT1G06110.1	280	275	305	370	377	332	4.96718	-0.132407	0.256788	SKP1/ASK-interacting protein 16
AT1G06120.1	39	43	40	121	58	77	2.36732	0.613707	0.105064	Fatty acid desaturase family protein
AT1G06130.1	232	279	297	344	389	335	4.89907	-0.0558334	0.725446	glyoxalase 2-4
AT1G06130.2	225	269	293	328	373	329	4.85004	-0.0698169	0.635085	glyoxalase 2-4
AT1G06135.1	0	0	0	0	0	0	-2.71529	0	1	unknown protein
AT1G06140.1	12	9	3	11	17	10	0.508739	0.194539	0.996399	Pentatricopeptide repeat (PPR) superfamily protein
AT1G06148.1	0	0	1	0	1	2	-1.97262	0.927257	0.858815	unknown protein
AT1G06148.2	0	0	1	0	1	2	-1.93796	0.926946	0.858562	unknown protein
AT1G06149.1	396	403	480	502	512	467	5.51664	-0.246174	0.00373202	conserved peptide upstream open reading frame 8
AT1G06150.1	404	401	485	517	521	479	5.51868	-0.22394	0.00720604	basic helix-loop-helix (bHLH) DNA-binding superfamily protein
AT1G06150.2	396	403	480	502	512	467	5.51664	-0.246174	0.00373202	basic helix-loop-helix (bHLH) DNA-binding superfamily protein
AT1G06160.1	13	5	8	24	12	21	-0.0951241	0.663695	0.47627	octadecanoid-responsive Arabidopsis AP2/ERF 59
AT1G06170.1	6	5	7	10	6	6	0.0127257	-0.164833	1	basic helix-loop-helix (bHLH) DNA-binding superfamily protein
AT1G06170.2	6	5	7	10	4	6	-0.00971754	-0.297977	0.880183	basic helix-loop-helix (bHLH) DNA-binding superfamily protein
AT1G06180.1	55	87	84	97	103	95	3.417	-0.0709943	0.91444	myb domain protein 13
AT1G06190.1	653	708	821	978	1360	1082	6.50291	0.188237	0.0449261	Rho termination factor
AT1G06190.2	506	573	674	789	1086	857	6.18001	0.181429	0.0669675	Rho termination factor
AT1G06200.1	380	408	471	531	551	494	5.6616	-0.133631	0.192073	Peptidase S24/S26A/S26B/S26C family protein
AT1G06210.1	315	339	354	437	368	414	5.17904	-0.182163	0.118169	ENTH/VHS/GAT family protein
AT1G06210.2	289	322	334	414	349	401	5.10101	-0.154759	0.238061	ENTH/VHS/GAT family protein
AT1G06220.1	792	804	912	1343	1409	1340	6.70847	0.248098	0.000517203	Ribosomal protein S5/Elongation factor G/III/V family protein
AT1G06220.2	787	806	900	1339	1406	1332	6.70674	0.251171	0.000399408	Ribosomal protein S5/Elongation factor G/III/V family protein
AT1G06225.1	0	0	0	0	0	0	-2.65764	0	1	CLAVATA3/ESR-RELATED 3
AT1G06230.1	628	599	620	759	830	768	6.06355	-0.11056	0.248972	global transcription factor group E4
AT1G06230.2	626	599	619	757	825	769	6.06244	-0.111745	0.243913	global transcription factor group E4
AT1G06230.3	595	561	593	706	792	732	5.9752	-0.111506	0.247416	global transcription factor group E4
AT1G06240.1	156	137	209	192	231	201	4.2114	-0.142413	0.436011	Protein of unknown function DUF455
AT1G06250.1	20	18	15	18	21	26	1.15931	-0.165196	0.857911	alpha/beta-Hydrolases superfamily protein
AT1G06260.1	14	6	8	13	14	12	0.53348	0.014309	1	Cysteine proteinases superfamily protein
AT1G06270.1	35	57	51	70	71	63	2.62377	0.0545618	0.961532	Pentatricopeptide repeat (PPR) superfamily protein
AT1G06280.1	0	0	0	0	0	0	-1.58986	0	1	LOB domain-containing protein 2
AT1G06290.1	664	783	791	1176	1043	1012	6.21453	0.0728541	0.548647	acyl-CoA oxidase 3
AT1G06310.1	9	20	14	32	13	25	0.58053	0.251827	0.740373	acyl-CoA oxidase 6
AT1G06320.1	1	3	1	7	1	6	-1.65694	0.989545	0.512991	unknown protein
AT1G06330.1	2	3	0	6	3	4	-1.58771	0.875832	0.61298	Heavy metal transport/detoxification superfamily protein
AT1G06340.1	0	0	0	1	0	0	-1.95538	1.72425	1	Plant Tudor-like protein
AT1G06350.1	48	44	49	33	52	60	3.0427	-0.417208	0.135859	Fatty acid desaturase family protein
AT1G06360.1	362	405	457	556	813	641	5.87601	0.255052	0.0354262	Fatty acid desaturase family protein
AT1G06370.1	20	30	40	32	41	38	1.8404	-0.149769	0.824699	pseudogene
AT1G06380.1	70	73	71	116	110	101	3.44939	0.152037	0.549466	Ribosomal protein L1p/L10e family
AT1G06390.1	437	454	513	581	640	569	5.56582	-0.108374	0.255349	GSK3/SHAGGY-like protein kinase 1
AT1G06390.2	409	409	463	528	590	520	5.43016	-0.104832	0.309853	GSK3/SHAGGY-like protein kinase 1
AT1G06400.1	349	325	418	410	384	353	5.08059	-0.386256	0.000169616	Ras-related small GTP-binding family protein
AT1G06410.1	1179	1323	1357	1490	1666	1524	6.91528	-0.181156	0.00695058	trehalose-phosphatase/synthase 7
AT1G06420.1	24	28	35	32	27	29	1.67789	-0.435791	0.247643	unknown protein
AT1G06420.2	18	21	30	28	19	26	1.46966	-0.366605	0.461977	unknown protein
AT1G06430.1	1980	2185	2566	2115	2443	1798	7.51508	-0.542383	2.98e-13	FTSH protease 8
AT1G06440.1	15	12	17	25	17	24	0.866402	0.128511	0.939984	Ubiquitin carboxyl-terminal hydrolase family protein
AT1G06450.1	42	43	42	61	54	59	2.46368	-0.00428663	1	Polynucleotidyl transferase, ribonuclease H-like superfamily protein
AT1G06460.1	403	463	545	485	517	435	6.05688	-0.430271	1.58e-07	alpha-crystallin domain 32.1
AT1G06470.1	190	185	210	300	296	263	4.63191	0.0949275	0.564677	Nucleotide/sugar transporter family protein
AT1G06470.2	202	204	229	331	324	279	4.75982	0.09735	0.535692	Nucleotide/sugar transporter family protein
AT1G06475.1	13	15	20	35	33	32	0.928193	0.598962	0.100061	unknown protein
AT1G06490.1	107	147	117	199	174	188	3.65759	0.13858	0.596988	glucan synthase-like 7
AT1G06500.1	63	66	70	62	76	98	3.09002	-0.209625	0.473213	unknown protein
AT1G06500.2	56	54	68	59	72	89	2.98716	-0.149688	0.670135	unknown protein
AT1G06500.3	63	66	71	67	80	104	3.14205	-0.127981	0.712744	unknown protein
AT1G06500.4	51	53	58	52	66	79	2.82439	-0.174883	0.578156	unknown protein
AT1G06510.1	158	137	197	193	264	211	4.28504	-0.0178318	1	unknown protein
AT1G06515.1	90	84	96	126	112	121	3.48018	-0.0470716	0.944635	Protein of unknown function (DUF3317)
AT1G06515.2	103	104	117	142	129	149	3.71306	-0.0827373	0.756628	Protein of unknown function (DUF3317)
AT1G06520.1	10	11	11	18	25	16	0.288183	0.415285	0.592891	glycerol-3-phosphate acyltransferase 1
AT1G06530.1	406	436	517	672	801	683	5.85373	0.207618	0.011595	Tropomyosin-related
AT1G06540.1	4	3	2	10	4	4	-0.602368	0.523948	0.725083	unknown protein
AT1G06550.1	682	724	735	1133	992	1028	6.43751	0.100154	0.366862	ATP-dependent caseinolytic (Clp) protease/crotonase family protein
AT1G06560.1	99	106	123	182	182	175	4.00796	0.258365	0.0589244	NOL1/NOP2/sun family protein
AT1G06570.1	617	819	931	650	748	615	5.94859	-0.687155	1.57e-15	phytoene desaturation 1
AT1G06570.2	574	747	843	607	698	570	5.82943	-0.661258	2.45e-14	phytoene desaturation 1
AT1G06580.1	16	22	18	26	24	26	1.48552	-0.0175728	1	Pentatricopeptide repeat (PPR) superfamily protein
AT1G06590.1	102	151	120	165	157	164	3.86873	-0.0756785	0.835068	unknown protein
AT1G06620.1	86	98	78	170	123	145	3.3216	0.281384	0.249977	2-oxoglutarate (2OG) and Fe(II)-dependent oxygenase superfamily protein
AT1G06630.1	107	131	103	138	141	133	3.6483	-0.188371	0.350509	F-box/RNI-like superfamily protein
AT1G06630.2	91	121	96	120	122	113	3.52221	-0.255208	0.190145	F-box/RNI-like superfamily protein
AT1G06630.3	93	118	92	125	126	125	3.50555	-0.149133	0.54876	F-box/RNI-like superfamily protein
AT1G06640.1	913	947	926	1218	1091	1049	6.59937	-0.192471	0.0521474	2-oxoglutarate (2OG) and Fe(II)-dependent oxygenase superfamily protein
AT1G06640.2	864	877	863	1126	1022	971	6.49613	-0.202184	0.0426049	2-oxoglutarate (2OG) and Fe(II)-dependent oxygenase superfamily protein
AT1G06640.3	833	849	844	1092	998	945	6.45327	-0.197236	0.0444816	2-oxoglutarate (2OG) and Fe(II)-dependent oxygenase superfamily protein
AT1G06645.1	78	97	137	73	102	70	3.18321	-0.802393	2.73e-06	2-oxoglutarate (2OG) and Fe(II)-dependent oxygenase superfamily protein
AT1G06650.1	401	470	560	450	511	405	5.44017	-0.523813	6.89e-11	2-oxoglutarate (2OG) and Fe(II)-dependent oxygenase superfamily protein
AT1G06650.2	464	528	615	493	585	461	5.61101	-0.520314	6.45e-12	2-oxoglutarate (2OG) and Fe(II)-dependent oxygenase superfamily protein
AT1G06660.1	36	36	26	68	48	59	2.01483	0.375044	0.228914	unknown protein
AT1G06670.1	589	651	712	1060	1078	1101	6.36309	0.274885	0.00122617	nuclear DEIH-boxhelicase
AT1G06680.1	28213	30007	34353	35609	43198	34757	11.7112	-0.165806	0.00706268	photosystem II subunit P-1
AT1G06680.2	25843	27329	31396	32401	39535	31625	11.5828	-0.16859	0.00715956	photosystem II subunit P-1
AT1G06690.1	548	585	701	710	864	732	6.2533	-0.127402	0.208872	NAD(P)-linked oxidoreductase superfamily protein
AT1G06700.1	511	571	543	711	703	652	5.9231	-0.114106	0.251477	Protein kinase superfamily protein
AT1G06700.2	512	559	533	707	689	639	5.90781	-0.117598	0.247643	Protein kinase superfamily protein
AT1G06710.1	57	75	61	76	89	101	3.06143	0.00463793	1	Tetratricopeptide repeat (TPR)-like superfamily protein
AT1G06720.1	346	443	429	681	741	725	5.84524	0.361134	0.00030617	P-loop containing nucleoside triphosphate hydrolases superfamily protein
AT1G06730.1	115	132	141	195	206	189	4.03847	0.146378	0.377476	pfkB-like carbohydrate kinase family protein
AT1G06750.1	7	8	15	11	9	14	0.656245	-0.270471	0.793093	P-loop containing nucleoside triphosphate hydrolases superfamily protein
AT1G06750.2	3	1	1	2	1	2	-1.41137	-0.428171	0.958311	P-loop containing nucleoside triphosphate hydrolases superfamily protein
AT1G06760.1	1725	1800	1807	2339	2461	2327	7.61078	-0.0433281	0.764962	winged-helix DNA-binding transcription factor family protein
AT1G06770.1	63	92	92	96	81	109	3.10221	-0.240614	0.308985	DREB2A-interacting protein 1
AT1G06770.2	65	84	95	96	78	106	3.07685	-0.253674	0.274097	DREB2A-interacting protein 1
AT1G06780.1	195	198	174	291	244	257	4.224	0.0193075	1	galacturonosyltransferase 6
AT1G06780.2	196	202	174	292	246	260	4.22344	0.0174177	1	galacturonosyltransferase 6
AT1G06790.1	82	94	59	116	116	116	3.49255	0.103308	0.769964	RNA polymerase Rpb7 N-terminal domain-containing protein
AT1G06790.2	94	107	72	140	132	132	3.65919	0.102635	0.750664	RNA polymerase Rpb7 N-terminal domain-containing protein
AT1G06800.1	87	105	103	146	138	125	3.50497	0.0128696	1	alpha/beta-Hydrolases superfamily protein
AT1G06800.2	73	87	85	117	116	103	3.18614	-0.00308353	1	alpha/beta-Hydrolases superfamily protein
AT1G06810.1	0	0	0	1	0	0	-2.42331	1.72432	1	unknown protein
AT1G06820.1	369	420	461	525	632	577	5.58446	0.0143693	1	carotenoid isomerase
AT1G06830.1	28	25	38	73	82	48	2.21749	0.69438	0.0195456	Glutaredoxin family protein
AT1G06840.1	263	267	219	307	267	293	4.57205	-0.252928	0.0996305	Leucine-rich repeat protein kinase family protein
AT1G06850.1	42	61	48	99	79	86	2.72385	0.348078	0.14767	basic leucine-zipper 52
AT1G06850.2	37	48	34	79	57	67	2.3318	0.310964	0.323313	basic leucine-zipper 52
AT1G06870.1	190	211	209	316	277	264	4.52591	0.0316349	0.959546	Peptidase S24/S26A/S26B/S26C family protein
AT1G06890.1	316	311	344	534	429	567	5.24971	0.202529	0.130157	nodulin MtN21 /EamA-like transporter family protein
AT1G06890.2	282	275	307	486	376	499	5.09889	0.202098	0.145628	nodulin MtN21 /EamA-like transporter family protein
AT1G06890.3	306	291	326	516	414	536	5.17295	0.213189	0.120735	nodulin MtN21 /EamA-like transporter family protein
AT1G06900.1	453	489	498	851	817	781	5.80986	0.307108	7.09e-05	Insulinase (Peptidase family M16) family protein
AT1G06910.1	52	63	75	83	86	75	2.87114	-0.0956228	0.826697	TRF-like 7
AT1G06920.1	0	0	0	1	0	1	-2.5227	2.48884	0.750664	ovate family protein 4
AT1G06923.1	5	6	4	15	7	5	-0.735949	0.380107	0.810962	unknown protein
AT1G06925.1	1	0	0	0	0	0	-2.68598	-2.0622	1	unknown protein
AT1G06930.1	5	5	4	14	16	12	-0.586527	1.1076	0.0635445	unknown protein
AT1G06950.1	1464	1596	1718	2722	3665	2975	7.74574	0.508121	5.07e-12	translocon at the inner envelope membrane of chloroplasts 110
AT1G06960.1	124	128	131	151	147	140	3.86468	-0.265571	0.0924085	RNA-binding (RRM/RBD/RNP motifs) family protein
AT1G06960.2	120	126	124	140	136	130	3.75672	-0.325393	0.037132	RNA-binding (RRM/RBD/RNP motifs) family protein
AT1G06960.3	112	113	116	135	138	126	3.71777	-0.233082	0.179939	RNA-binding (RRM/RBD/RNP motifs) family protein
AT1G06970.1	2	0	1	1	3	1	-1.87048	0.250616	1	cation/hydrogen exchanger 14
AT1G06980.1	28	15	17	35	46	30	2.60454	0.424011	0.251895	unknown protein
AT1G06990.1	0	0	0	0	0	0	-2.60216	0	1	GDSL-like Lipase/Acylhydrolase superfamily protein
AT1G07000.1	94	94	97	129	89	137	3.18769	-0.135514	0.775901	exocyst subunit exo70 family protein B2
AT1G07010.1	893	949	1119	960	1267	989	6.54875	-0.340815	1.67e-05	Calcineurin-like metallo-phosphoesterase superfamily protein
AT1G07010.2	856	912	1079	922	1222	945	6.48764	-0.342287	1.7e-05	Calcineurin-like metallo-phosphoesterase superfamily protein
AT1G07010.3	814	868	1040	870	1159	913	6.42431	-0.347086	1.47e-05	Calcineurin-like metallo-phosphoesterase superfamily protein
AT1G07020.1	72	73	91	117	77	106	3.12866	-0.106814	0.790587	unknown protein
AT1G07025.1	0	0	0	0	0	0	-2.71531	0	1	Mitochondrial substrate carrier family protein
AT1G07030.1	170	240	228	322	270	309	4.7014	0.0445847	0.893936	Mitochondrial substrate carrier family protein
AT1G07040.1	137	167	186	217	151	130	3.93739	-0.431717	0.0055992	unknown protein
AT1G07050.1	6	5	8	8	8	6	0.0667318	-0.242172	0.969941	CCT motif family protein
AT1G07060.1	0	2	1	3	2	0	-2.06307	0.25353	1	unknown protein
AT1G07070.1	123	145	173	318	296	323	4.53352	0.633648	1.18e-07	Ribosomal protein L35Ae family protein
AT1G07080.1	634	627	821	823	818	737	6.16051	-0.263983	0.000592751	Thioredoxin superfamily protein
AT1G07090.1	63	67	58	103	106	115	2.91889	0.324657	0.179921	Protein of unknown function (DUF640)
AT1G07110.1	1399	1436	1651	1576	2010	1528	7.31108	-0.273507	0.0002119	fructose-2,6-bisphosphatase
AT1G07120.1	15	16	13	7	20	20	0.714113	-0.362288	0.569307	unknown protein
AT1G07130.1	53	48	63	64	58	57	2.54391	-0.330744	0.17476	Nucleic acid-binding, OB-fold-like protein
AT1G07135.1	6	14	16	13	19	8	0.629426	-0.302646	0.766081	glycine-rich protein
AT1G07140.1	996	1094	1211	1850	1759	1799	7.06711	0.257154	0.000473507	Pleckstrin homology (PH) domain superfamily protein
AT1G07150.1	25	36	35	27	29	24	1.74303	-0.718049	0.0148303	mitogen-activated protein kinase kinase kinase 13
AT1G07150.2	25	36	35	27	29	24	1.74303	-0.718049	0.0148303	mitogen-activated protein kinase kinase kinase 13
AT1G07160.1	3	3	2	3	2	2	-1.61506	-0.621172	0.848013	Protein phosphatase 2C family protein
AT1G07170.1	67	80	101	130	93	139	3.30771	0.0959515	0.747347	PHF5-like protein
AT1G07170.2	42	62	72	99	70	105	2.89121	0.189337	0.471862	PHF5-like protein
AT1G07170.3	54	75	89	120	83	126	3.17575	0.145425	0.586502	PHF5-like protein
AT1G07175.1	2	2	2	5	0	9	-1.29623	0.748905	0.670294	unknown protein
AT1G07180.1	1341	1393	1570	1496	1926	1607	7.02867	-0.236478	0.00293677	alternative NAD(P)H dehydrogenase 1
AT1G07200.1	125	182	173	177	218	180	3.90404	-0.197559	0.167938	Double Clp-N motif-containing P-loop nucleoside triphosphate hydrolases superfamily protein
AT1G07200.2	216	264	255	307	336	307	4.49729	-0.0884385	0.504153	Double Clp-N motif-containing P-loop nucleoside triphosphate hydrolases superfamily protein
AT1G07210.1	277	309	332	481	451	450	5.21758	0.13306	0.228776	Ribosomal protein S18
AT1G07220.1	119	97	128	151	177	161	3.59749	0.0481859	0.926378	Arabidopsis thaliana protein of unknown function (DUF821)
AT1G07230.1	255	271	306	342	294	293	4.77853	-0.297858	0.00394498	non-specific phospholipase C1
AT1G07240.1	144	165	160	215	154	211	4.25123	-0.148218	0.446605	UDP-glucosyl transferase 71C5
AT1G07250.1	347	400	382	446	454	375	5.36274	-0.28497	0.000911904	UDP-glucosyl transferase 71C4
AT1G07260.1	64	68	86	115	69	104	2.718	-0.0464796	1	UDP-glucosyl transferase 71C3
AT1G07270.1	18	22	16	26	29	24	1.04005	0.0361239	1	Cell division control, Cdc6
AT1G07280.1	527	559	576	670	861	639	6.06113	-0.0796635	0.532042	Tetratricopeptide repeat (TPR)-like superfamily protein
AT1G07280.2	501	533	551	639	823	609	6.0069	-0.0784791	0.553421	Tetratricopeptide repeat (TPR)-like superfamily protein
AT1G07280.3	509	538	556	643	832	611	6.01804	-0.0847654	0.514686	Tetratricopeptide repeat (TPR)-like superfamily protein
AT1G07290.1	12	17	16	36	31	27	1.16967	0.601497	0.13378	golgi nucleotide sugar transporter 2
AT1G07300.1	41	42	33	63	43	36	2.29779	-0.169285	0.688425	josephin protein-related
AT1G07310.1	192	195	213	284	233	253	4.58017	-0.0974648	0.548261	Calcium-dependent lipid-binding (CaLB domain) family protein
AT1G07320.1	2460	2701	3196	4232	5878	4357	8.53286	0.331031	9.17e-05	ribosomal protein L4
AT1G07320.2	2245	2446	2924	3845	5400	3966	8.38755	0.334016	0.000112493	ribosomal protein L4
AT1G07320.3	1898	2062	2475	3276	4638	3457	8.13634	0.360901	2.03e-05	ribosomal protein L4
AT1G07320.4	2248	2448	2930	3844	5389	3967	8.38772	0.330829	0.000124972	ribosomal protein L4
AT1G07330.1	0	1	1	4	3	2	-1.4975	1.56842	0.273214	unknown protein
AT1G07340.1	0	0	0	0	0	0	-2.71529	0	1	sugar transporter 2
AT1G07350.1	276	302	362	400	384	401	5.09717	-0.120086	0.388025	RNA-binding (RRM/RBD/RNP motifs) family protein
AT1G07350.2	282	313	385	410	406	420	5.15634	-0.118413	0.408347	RNA-binding (RRM/RBD/RNP motifs) family protein
AT1G07360.1	361	411	456	572	627	625	5.62888	0.114452	0.257364	CCCH-type zinc fingerfamily protein with RNA-binding domain
AT1G07370.1	197	217	214	312	345	328	4.85138	0.190231	0.089841	proliferating cellular nuclear antigen 1
AT1G07380.1	137	161	161	229	185	185	3.89874	-0.0732454	0.768344	Neutral/alkaline non-lysosomal ceramidase
AT1G07390.1	40	47	39	63	95	73	2.32732	0.411961	0.0863546	receptor like protein 1
AT1G07390.2	39	43	34	58	86	66	2.24769	0.394042	0.108851	receptor like protein 1
AT1G07390.3	39	45	37	63	94	73	2.2983	0.463672	0.0518683	receptor like protein 1
AT1G07400.1	8	46	33	12	8	17	1.06064	-1.65857	0.000115681	HSP20-like chaperones superfamily protein
AT1G07410.1	23	21	21	42	24	38	1.25371	0.220567	0.668513	RAB GTPase homolog A2B
AT1G07420.1	158	184	192	249	215	235	4.7395	-0.0685509	0.746029	sterol 4-alpha-methyl-oxidase 2-1
AT1G07420.2	153	176	185	248	211	231	4.69903	-0.0321842	0.973696	sterol 4-alpha-methyl-oxidase 2-1
AT1G07430.1	46	47	49	15	24	20	2.03391	-1.7217	1.52e-08	highly ABA-induced PP2C gene 2
AT1G07440.1	387	401	497	516	579	493	5.70412	-0.151967	0.158913	NAD(P)-binding Rossmann-fold superfamily protein
AT1G07440.2	346	362	456	467	515	449	5.55382	-0.158561	0.159733	NAD(P)-binding Rossmann-fold superfamily protein
AT1G07450.1	50	60	66	46	58	44	2.63738	-0.706916	0.000549147	NAD(P)-binding Rossmann-fold superfamily protein
AT1G07460.1	0	0	1	0	0	1	-2.28559	-0.326901	1	Concanavalin A-like lectin family protein
AT1G07470.1	419	373	456	479	511	478	5.38459	-0.225073	0.0149068	Transcription factor IIA, alpha/beta subunit
AT1G07473.1	1	2	2	0	0	0	-1.87089	-4.07089	0.115067	unknown protein
AT1G07476.1	0	0	0	0	0	0	-2.62964	0	1	unknown protein
AT1G07480.1	426	390	452	505	529	478	5.39274	-0.206388	0.0273395	Transcription factor IIA, alpha/beta subunit
AT1G07480.2	419	384	445	494	517	469	5.36725	-0.214234	0.0220063	Transcription factor IIA, alpha/beta subunit
AT1G07485.1	29	26	33	39	39	31	1.47339	-0.149548	0.748032	unknown protein
AT1G07490.1	34	30	44	46	41	37	1.73974	-0.257326	0.476614	ROTUNDIFOLIA like 3
AT1G07500.1	1	1	4	4	4	5	-1.45931	0.633668	0.745968	unknown protein
AT1G07510.1	404	477	456	693	608	577	5.64513	0.0314198	0.932396	FTSH protease 10
AT1G07520.1	113	114	118	142	102	118	3.33817	-0.387697	0.0535027	GRAS family transcription factor
AT1G07530.1	368	380	435	395	435	412	5.18178	-0.387717	4.12e-06	SCARECROW-like 14
AT1G07540.1	1	0	0	0	1	0	-2.44747	-0.337853	1	TRF-like 2
AT1G07550.1	4	4	8	3	4	4	-0.651056	-0.967134	0.327791	Leucine-rich repeat protein kinase family protein
AT1G07560.1	54	55	43	76	30	54	2.13573	-0.38347	0.40814	Leucine-rich repeat protein kinase family protein
AT1G07570.1	147	174	177	145	193	190	4.06488	-0.373362	0.00526179	Protein kinase superfamily protein
AT1G07570.2	145	168	174	141	192	182	4.03979	-0.377479	0.00521916	Protein kinase superfamily protein
AT1G07570.3	130	146	157	126	177	169	3.89562	-0.333507	0.0252649	Protein kinase superfamily protein
AT1G07590.1	13620	13451	14136	17648	12887	13718	10.3355	-0.356068	0.00516186	Tetratricopeptide repeat (TPR)-like superfamily protein
AT1G07600.1	2580	2564	2840	3269	2435	2525	7.92125	-0.413445	0.000294536	metallothionein 1A
AT1G07610.1	1759	1695	1677	2448	1569	2071	7.36272	-0.210772	0.361103	metallothionein 1C
AT1G07615.1	63	60	61	96	104	92	3.19725	0.205081	0.445557	GTP-binding protein Obg/CgtA
AT1G07620.1	32	41	30	33	22	35	1.36783	-0.648514	0.176311	GTP-binding protein Obg/CgtA
AT1G07630.1	182	177	161	268	206	227	4.19091	-0.0301198	0.992642	pol-like 5
AT1G07640.1	328	344	419	399	439	413	5.37576	-0.258689	0.0153663	Dof-type zinc finger DNA-binding family protein
AT1G07640.2	321	337	406	388	428	401	5.34129	-0.262604	0.0144792	Dof-type zinc finger DNA-binding family protein
AT1G07640.3	322	336	410	387	430	398	5.3412	-0.270392	0.0110954	Dof-type zinc finger DNA-binding family protein
AT1G07645.1	0	1	1	0	0	0	-2.16005	-2.86602	0.76322	dessication-induced 1VOC superfamily protein
AT1G07650.1	300	321	322	347	430	360	5.35731	-0.190715	0.0490802	Leucine-rich repeat transmembrane protein kinase
AT1G07650.2	283	308	299	335	407	343	5.29635	-0.174883	0.0844267	Leucine-rich repeat transmembrane protein kinase
AT1G07660.1	339	364	432	475	454	442	5.60109	-0.183228	0.0840944	Histone superfamily protein
AT1G07660.2	216	225	242	294	277	257	4.876	-0.181032	0.157305	Histone superfamily protein
AT1G07670.1	745	818	832	1370	1197	1264	6.41054	0.220807	0.0335917	endomembrane-type CA-ATPase 4
AT1G07690.1	0	0	0	0	0	1	-2.54867	1.72548	1	unknown protein
AT1G07700.1	620	644	763	738	890	685	6.05703	-0.269862	0.00286717	Thioredoxin superfamily protein
AT1G07700.2	536	549	654	638	735	596	5.82525	-0.280146	0.00161588	Thioredoxin superfamily protein
AT1G07700.3	540	561	680	654	774	593	5.88328	-0.27719	0.00420669	Thioredoxin superfamily protein
AT1G07705.1	225	221	244	350	359	323	4.75547	0.121494	0.321642	NOT2 / NOT3 / NOT5 family
AT1G07705.2	234	233	253	360	366	335	4.79971	0.100272	0.430394	NOT2 / NOT3 / NOT5 family
AT1G07710.1	10	11	8	14	10	13	0.0328402	-0.106337	1	Ankyrin repeat family protein
AT1G07720.1	258	306	384	277	408	293	4.91331	-0.411848	0.00251168	3-ketoacyl-CoA synthase 3
AT1G07725.1	100	115	105	135	120	129	3.56408	-0.195313	0.31856	exocyst subunit exo70 family protein H6
AT1G07730.2	22	41	44	74	33	55	2.0842	0.156265	0.78383	Disease resistance-responsive (dirigent-like protein) family protein
AT1G07740.1	53	79	70	123	79	97	2.93644	0.113141	0.788454	Tetratricopeptide repeat (TPR)-like superfamily protein
AT1G07745.1	34	41	56	37	60	47	2.34687	-0.31883	0.329124	homolog of RAD51 D
AT1G07745.2	32	43	58	36	61	48	2.39717	-0.32986	0.28475	homolog of RAD51 D
AT1G07750.1	277	241	272	417	329	333	4.87797	-0.0104642	1	RmlC-like cupins superfamily protein
AT1G07770.1	1759	1870	1997	3146	3222	2963	7.8953	0.270503	5.18e-06	ribosomal protein S15A
AT1G07770.2	1636	1770	1910	2939	3073	2767	7.82063	0.264677	1.04e-05	ribosomal protein S15A
AT1G07780.1	158	218	204	302	336	317	4.83867	0.261802	0.0246742	phosphoribosylanthranilate isomerase 1
AT1G07780.2	158	218	198	294	330	313	4.81741	0.249024	0.0386203	phosphoribosylanthranilate isomerase 1
AT1G07780.3	172	228	215	353	385	375	4.94626	0.398154	0.000100486	phosphoribosylanthranilate isomerase 1
AT1G07780.4	168	219	201	334	370	364	4.88047	0.402947	0.000121345	phosphoribosylanthranilate isomerase 1
AT1G07780.5	158	219	201	295	332	312	4.82256	0.242142	0.0404451	phosphoribosylanthranilate isomerase 1
AT1G07790.1	429	479	484	648	673	704	6.0475	0.0832096	0.468902	Histone superfamily protein
AT1G07795.1	5	3	3	8	4	5	-0.980265	0.161092	1	unknown protein
AT1G07810.1	689	740	765	1199	1043	1047	6.23805	0.126082	0.283345	ER-type Ca2+-ATPase 1
AT1G07820.1	619	635	753	824	839	843	6.46381	-0.135556	0.140326	Histone superfamily protein
AT1G07820.2	597	616	737	775	830	807	6.41953	-0.149407	0.100751	Histone superfamily protein
AT1G07830.1	153	158	150	245	251	242	4.42553	0.219055	0.0951951	ribosomal protein L29 family protein
AT1G07840.1	180	170	196	269	308	276	4.56936	0.18416	0.151922	Sas10/Utp3/C1D family
AT1G07840.2	160	156	176	252	275	257	4.45545	0.213213	0.089648	Sas10/Utp3/C1D family
AT1G07840.3	168	148	183	253	294	265	4.45421	0.242865	0.0613784	Sas10/Utp3/C1D family
AT1G07850.1	0	1	0	0	2	0	-2.28574	0.426269	1	Protein of unknown function (DUF604)
AT1G07860.1	0	0	0	0	0	0	-2.54881	0	1	unknown protein
AT1G07870.1	98	119	122	159	129	173	3.60777	-0.00903636	1	Protein kinase superfamily protein
AT1G07870.2	87	115	106	145	122	156	3.46495	0.00371103	1	Protein kinase superfamily protein
AT1G07880.1	39	40	36	55	58	62	2.01296	0.145925	0.747854	Protein kinase superfamily protein
AT1G07880.2	41	37	33	56	61	63	1.99044	0.235783	0.516492	Protein kinase superfamily protein
AT1G07890.1	5946	6875	7106	10657	9136	9614	9.45918	0.107205	0.28487	ascorbate peroxidase 1
AT1G07890.2	5593	6512	6709	9977	8600	8974	9.38119	0.0959727	0.357056	ascorbate peroxidase 1
AT1G07890.3	5573	6483	6683	9943	8573	8947	9.37654	0.0971137	0.350002	ascorbate peroxidase 1
AT1G07890.4	5590	6506	6703	9978	8596	8967	9.38044	0.0965807	0.352777	ascorbate peroxidase 1
AT1G07890.5	5574	6484	6688	9950	8576	8956	9.37722	0.0976128	0.346837	ascorbate peroxidase 1
AT1G07890.6	5542	6426	6614	9913	8458	8973	9.3408	0.103207	0.312594	ascorbate peroxidase 1
AT1G07890.7	5576	6483	6684	9951	8576	8952	9.377	0.0976385	0.346453	ascorbate peroxidase 1
AT1G07890.8	5589	6509	6705	9974	8597	8969	9.38088	0.0962393	0.355188	ascorbate peroxidase 1
AT1G07900.1	1	2	5	5	0	1	-1.64308	-0.817626	0.706902	LOB domain-containing protein 1
AT1G07901.1	4	4	4	6	4	5	-1.01675	-0.132686	1	unknown protein
AT1G07910.1	190	185	246	285	314	320	4.55655	0.109915	0.479729	RNAligase
AT1G07910.2	196	189	249	295	324	326	4.60732	0.119872	0.416284	RNAligase
AT1G07920.1	9792	10620	11317	21320	21550	20413	10.5195	0.537718	6.66e-25	GTP binding Elongation factor Tu family protein
AT1G07930.1	8703	9537	10170	19327	19514	18337	10.3541	0.550995	5.51e-26	GTP binding Elongation factor Tu family protein
AT1G07930.2	6672	7345	7796	14720	14821	14002	9.95853	0.539299	4.6e-23	GTP binding Elongation factor Tu family protein
AT1G07940.1	9618	10355	11020	20877	21034	19833	10.4692	0.535628	7.98e-24	GTP binding Elongation factor Tu family protein
AT1G07940.2	9509	10246	10893	20615	20736	19564	10.455	0.532286	1.52e-23	GTP binding Elongation factor Tu family protein
AT1G07950.1	118	124	122	166	148	149	3.78468	-0.111708	0.57776	Surfeit locus protein 5 subunit 22 of Mediator complex
AT1G07960.1	229	209	259	288	278	276	4.60307	-0.185302	0.098976	PDI-like 5-1
AT1G07960.2	241	221	273	306	290	288	4.66435	-0.191615	0.0803431	PDI-like 5-1
AT1G07960.3	246	213	266	305	286	294	4.66273	-0.170383	0.15156	PDI-like 5-1
AT1G07970.1	116	139	157	189	215	182	4.02695	0.0502027	0.871284	unknown protein
AT1G07980.1	113	138	159	177	165	174	4.00965	-0.122304	0.597684	nuclear factor Y, subunit C10
AT1G07985.1	16	20	17	35	20	25	0.938841	0.137422	0.926435	Expressed protein
AT1G07990.1	508	522	537	643	620	658	5.75978	-0.164681	0.0759533	SIT4 phosphatase-associated family protein
AT1G08000.1	67	67	84	116	108	105	3.26856	0.136154	0.596711	GATA transcription factor 10
AT1G08000.2	58	54	79	97	105	90	3.12625	0.154835	0.575399	GATA transcription factor 10
AT1G08005.1	0	0	0	0	1	0	-2.49719	1.72246	1	unknown protein
AT1G08010.1	122	119	145	184	165	177	4.01668	-0.0109538	1	GATA transcription factor 11
AT1G08010.2	87	87	102	133	106	129	3.52224	-0.041908	0.968243	GATA transcription factor 11
AT1G08030.1	216	235	276	283	291	272	4.67392	-0.238101	0.0430565	tyrosylprotein sulfotransferase
AT1G08035.1	0	3	1	2	3	0	-1.48499	-0.127613	1	unknown protein
AT1G08040.1	195	225	239	290	308	293	4.66439	-0.0225748	1	Protein of unknown function (DUF707)
AT1G08040.2	183	228	234	280	304	291	4.64322	-0.017113	1	Protein of unknown function (DUF707)
AT1G08050.1	52	48	57	95	64	92	2.52054	0.224001	0.544224	Zinc finger (C3HC4-type RING finger) family protein
AT1G08060.1	272	328	329	398	394	323	4.9106	-0.195959	0.079468	ATP-dependent helicase family protein
AT1G08060.2	265	322	322	382	383	313	4.86625	-0.213176	0.0465172	ATP-dependent helicase family protein
AT1G08065.1	0	0	0	0	0	0	-2.28601	0	1	alpha carbonic anhydrase 5
AT1G08070.1	10	10	11	8	19	8	0.676689	-0.283816	0.737603	Tetratricopeptide repeat (TPR)-like superfamily protein
AT1G08080.1	3	1	0	3	3	2	-1.40003	0.498298	0.981236	alpha carbonic anhydrase 7
AT1G08090.1	23	44	44	158	109	205	2.90874	1.65853	0.00586077	nitrate transporter 2:1
AT1G08100.1	2	3	2	13	10	20	-0.327215	2.11741	0.001275	nitrate transporter 2.2
AT1G08110.1	733	844	912	928	1018	909	6.49168	-0.259838	0.000124098	lactoylglutathione lyase family protein / glyoxalase I family protein
AT1G08110.2	733	851	912	938	1042	905	6.49629	-0.249251	0.000312024	lactoylglutathione lyase family protein / glyoxalase I family protein
AT1G08110.3	733	847	912	939	1037	922	6.50085	-0.240084	0.000567299	lactoylglutathione lyase family protein / glyoxalase I family protein
AT1G08110.4	750	863	933	953	1063	925	6.52629	-0.250093	0.000205451	lactoylglutathione lyase family protein / glyoxalase I family protein
AT1G08120.1	0	0	0	1	1	1	-1.97282	2.98394	0.477971	unknown protein
AT1G08125.1	133	121	153	167	159	167	3.99053	-0.180956	0.253745	S-adenosyl-L-methionine-dependent methyltransferases superfamily protein
AT1G08125.2	131	115	144	156	152	158	3.92894	-0.201048	0.202381	S-adenosyl-L-methionine-dependent methyltransferases superfamily protein
AT1G08125.3	88	91	96	104	100	116	3.4476	-0.238855	0.199086	S-adenosyl-L-methionine-dependent methyltransferases superfamily protein
AT1G08130.1	383	442	423	580	626	542	5.70813	0.0256881	0.944635	DNA ligase 1
AT1G08140.1	0	0	0	0	1	1	-2.68607	2.48716	0.750664	cation/H+ exchanger 6A
AT1G08150.1	0	0	0	0	0	0	-2.68619	0	1	Cation/hydrogen exchanger family protein
AT1G08160.1	112	102	117	169	135	173	3.51594	0.0714087	0.858727	Late embryogenesis abundant (LEA) hydroxyproline-rich glycoprotein family
AT1G08165.1	7	2	4	6	10	4	-0.296545	0.149996	1	unknown protein
AT1G08170.1	1	1	0	1	1	0	-2.06339	-0.390536	1	Histone superfamily protein
AT1G08180.1	33	46	49	42	52	35	2.03526	-0.445969	0.0779562	unknown protein
AT1G08190.1	1124	1265	1377	1834	1746	1615	7.08098	0.00726826	1	vacuolar protein sorting 41
AT1G08200.1	2105	2237	2462	3093	3061	2747	7.96046	-0.0712053	0.337972	UDP-D-apiose/UDP-D-xylose synthase 2
AT1G08210.1	128	148	142	200	191	182	4.03972	-0.00364759	1	Eukaryotic aspartyl protease family protein
AT1G08220.1	54	84	64	157	116	155	3.31668	0.628428	0.000582678	unknown protein
AT1G08220.2	37	72	47	125	87	128	2.94572	0.671456	0.00316378	unknown protein
AT1G08230.2	101	109	141	118	143	119	3.77984	-0.34282	0.0211025	Transmembrane amino acid transporter family protein
AT1G08250.1	177	189	189	225	222	208	4.31556	-0.220098	0.0769046	arogenate dehydratase 6
AT1G08260.1	294	367	368	511	479	465	5.27832	0.0436931	0.879125	DNA polymerase epsilon catalytic subunit
AT1G08270.1	9	5	5	9	8	12	-0.00375967	0.148437	1	unknown protein
AT1G08270.2	19	21	20	33	31	30	1.58764	0.187743	0.812977	unknown protein
AT1G08280.1	62	68	98	129	126	120	3.37481	0.262887	0.179017	Glycosyltransferase family 29 (sialyltransferase) family protein
AT1G08290.1	22	46	39	43	58	62	1.82533	0.154116	0.781142	WIP domain protein 3
AT1G08300.1	24	29	42	41	47	48	2.29764	0.0623915	0.996731	no vein-like
AT1G08310.1	14	11	15	30	24	17	0.934754	0.365752	0.472576	alpha/beta-Hydrolases superfamily protein
AT1G08310.2	13	11	15	28	26	16	0.906289	0.381305	0.46515	alpha/beta-Hydrolases superfamily protein
AT1G08315.1	40	62	56	78	72	61	2.54744	-0.0404222	1	ARM repeat superfamily protein
AT1G08320.1	99	109	88	160	78	111	3.22337	-0.22048	0.556871	bZIP transcription factor family protein
AT1G08320.2	85	91	73	135	67	97	2.99823	-0.194701	0.652144	bZIP transcription factor family protein
AT1G08320.3	99	105	83	153	76	110	3.18786	-0.219233	0.559183	bZIP transcription factor family protein
AT1G08340.1	54	55	54	132	81	91	2.73624	0.440883	0.0891081	Rho GTPase activating protein with PAK-box/P21-Rho-binding domain
AT1G08350.1	91	108	114	145	113	157	3.47063	-0.0449283	0.978798	Endomembrane protein 70 protein family
AT1G08350.2	95	111	117	152	119	163	3.50646	-0.0260422	1	Endomembrane protein 70 protein family
AT1G08360.1	1949	2134	2266	3702	3828	3493	8.14693	0.336985	1.35e-09	Ribosomal protein L1p/L10e family
AT1G08370.1	211	256	268	377	312	369	4.87468	0.0718807	0.700652	decapping 1
AT1G08380.1	16450	17606	20394	19834	24184	19534	11.074	-0.236794	0.000464621	photosystem I subunit O
AT1G08390.1	49	43	58	70	87	70	2.7509	0.138636	0.649811	unknown protein
AT1G08400.1	55	62	73	111	101	89	2.94708	0.20575	0.364032	RINT-1 / TIP-1 family
AT1G08410.1	162	182	177	296	293	298	4.50457	0.309177	0.00865822	P-loop containing nucleoside triphosphate hydrolases superfamily protein
AT1G08420.1	503	607	609	813	747	727	5.91609	-0.0450857	0.763578	BRI1 suppressor 1 (BSU1)-like 2
AT1G08420.2	505	597	604	798	746	720	5.90434	-0.0491103	0.728382	BRI1 suppressor 1 (BSU1)-like 2
AT1G08430.1	103	126	82	140	57	104	3.05931	-0.504932	0.13383	aluminum-activated malate transporter 1
AT1G08440.1	3	5	7	5	8	5	-0.581812	-0.190199	1	Aluminium activated malate transporter family protein
AT1G08450.1	409	394	469	568	556	578	5.51433	-0.0368449	0.858815	calreticulin 3
AT1G08450.2	339	313	388	446	483	474	5.2481	-0.0259346	0.951035	calreticulin 3
AT1G08450.3	368	343	411	495	495	499	5.30805	-0.049582	0.768171	calreticulin 3
AT1G08460.1	183	170	201	206	206	199	4.12468	-0.317117	0.00544229	histone deacetylase 8
AT1G08465.1	89	75	128	123	138	99	3.54424	-0.153937	0.620696	Plant-specific transcription factor YABBY family protein
AT1G08470.1	150	169	182	242	264	227	4.2158	0.090185	0.633289	strictosidine synthase-like 3
AT1G08480.1	471	544	509	919	738	801	6.02788	0.232219	0.0204067	unknown protein
AT1G08490.1	433	456	538	563	706	581	5.68392	-0.0844942	0.462651	chloroplastic NIFS-like cysteine desulfurase
AT1G08500.1	50	59	53	111	55	68	2.4935	0.0749067	0.95469	early nodulin-like protein 18
AT1G08510.1	784	775	948	1065	1106	1039	6.37017	-0.100301	0.279574	fatty acyl-ACP thioesterases B
AT1G08520.1	1734	1914	2158	2604	3524	2619	7.84431	0.129116	0.179629	ALBINA 1
AT1G08530.1	89	103	122	134	156	126	3.47564	-0.0521952	0.90766	unknown protein
AT1G08540.1	934	1011	1331	1455	1962	1539	7.01029	0.141537	0.188179	RNApolymerase sigma subunit 2
AT1G08550.1	475	522	636	433	646	502	6.04754	-0.505009	5.78e-08	non-photochemical quenching 1
AT1G08550.2	466	505	621	420	631	501	6.02043	-0.494785	1.13e-07	non-photochemical quenching 1
AT1G08560.1	197	257	287	398	492	502	5.09198	0.45716	0.000155983	syntaxin of plants 111
AT1G08570.1	856	836	954	732	846	714	6.18956	-0.668424	4.52e-20	atypical CYS HIS rich thioredoxin 4
AT1G08570.2	727	734	806	628	743	604	5.98015	-0.660676	6.08e-20	atypical CYS HIS rich thioredoxin 4
AT1G08570.3	772	754	865	666	768	620	6.05488	-0.680854	3.49e-19	atypical CYS HIS rich thioredoxin 4
AT1G08570.4	766	752	860	658	757	615	6.04658	-0.689756	6.25e-20	atypical CYS HIS rich thioredoxin 4
AT1G08580.1	312	330	360	490	555	563	5.55109	0.224836	0.0256304	unknown protein
AT1G08590.1	143	139	153	316	202	213	3.93626	0.291576	0.183325	Leucine-rich receptor-like protein kinase family protein
AT1G08600.1	429	430	508	648	585	673	5.60501	0.0256367	0.959361	P-loop containing nucleoside triphosphate hydrolases superfamily protein
AT1G08600.2	441	432	510	655	582	685	5.62035	0.0208526	0.995187	P-loop containing nucleoside triphosphate hydrolases superfamily protein
AT1G08600.3	440	441	518	665	595	695	5.64043	0.0291153	0.939644	P-loop containing nucleoside triphosphate hydrolases superfamily protein
AT1G08600.4	442	440	516	664	595	686	5.63331	0.0222466	0.983472	P-loop containing nucleoside triphosphate hydrolases superfamily protein
AT1G08610.1	63	50	67	85	117	106	3.45695	0.314609	0.169226	Pentatricopeptide repeat (PPR) superfamily protein
AT1G08620.1	377	416	474	518	499	499	5.34012	-0.197024	0.040913	Transcription factor jumonji (jmj) family protein / zinc finger (C5HC2 type) family protein
AT1G08620.2	389	429	480	532	508	502	5.37275	-0.207846	0.0281059	Transcription factor jumonji (jmj) family protein / zinc finger (C5HC2 type) family protein
AT1G08630.1	15	28	23	14	17	8	1.43566	-1.20884	0.000825944	threonine aldolase 1
AT1G08630.2	15	28	23	13	16	8	1.42249	-1.28374	0.000295934	threonine aldolase 1
AT1G08630.3	15	29	24	13	15	8	1.44233	-1.36537	8.33e-05	threonine aldolase 1
AT1G08630.4	15	27	22	12	15	8	1.36306	-1.31882	0.000200533	threonine aldolase 1
AT1G08630.5	14	23	21	11	15	7	1.23051	-1.26153	0.00126613	threonine aldolase 1
AT1G08640.1	555	622	691	898	1199	907	6.36953	0.224226	0.00813885	Chloroplast J-like domain 1
AT1G08650.1	242	331	360	396	320	379	5.15612	-0.216485	0.179326	phosphoenolpyruvate carboxylase kinase 1
AT1G08650.2	182	241	251	307	233	265	4.67287	-0.194259	0.309461	phosphoenolpyruvate carboxylase kinase 1
AT1G08660.1	269	281	306	337	355	319	4.92376	-0.218904	0.0379699	MALE GAMETOPHYTE DEFECTIVE 2
AT1G08660.2	278	292	304	345	361	313	4.95431	-0.238496	0.019759	MALE GAMETOPHYTE DEFECTIVE 2
AT1G08670.1	18	7	16	39	13	24	1.06433	0.434549	0.555781	ENTH/VHS family protein
AT1G08680.1	339	383	418	507	514	496	5.31903	-0.0447559	0.814257	ARF GAP-like zinc finger-containing protein ZIGA4
AT1G08680.2	333	377	410	500	505	494	5.29513	-0.0362948	0.880183	ARF GAP-like zinc finger-containing protein ZIGA4
AT1G08680.3	315	363	379	472	473	455	5.20739	-0.0520548	0.767081	ARF GAP-like zinc finger-containing protein ZIGA4
AT1G08680.4	322	366	400	479	499	470	5.24154	-0.0448142	0.818021	ARF GAP-like zinc finger-containing protein ZIGA4
AT1G08700.1	223	215	236	368	338	339	4.77489	0.174015	0.139141	Presenilin-1
AT1G08710.1	56	84	70	88	84	96	3.11631	-0.104741	0.767606	F-box family protein
AT1G08710.2	48	72	56	75	71	88	2.84408	-0.0457695	1	F-box family protein
AT1G08720.1	230	246	259	293	274	259	4.52361	-0.290134	0.00846698	Protein kinase superfamily protein
AT1G08730.1	14	23	18	23	26	18	0.984025	-0.173277	0.83447	Myosin family protein with Dil domain
AT1G08750.1	116	119	129	173	164	149	3.68267	-0.0417229	0.938614	Peptidase C13 family
AT1G08750.2	114	119	128	172	161	147	3.66868	-0.0476232	0.919743	Peptidase C13 family
AT1G08750.3	129	128	134	188	178	163	3.78893	-0.023277	1	Peptidase C13 family
AT1G08760.1	181	180	196	263	233	214	4.20994	-0.109196	0.552623	Plant protein of unknown function (DUF936)
AT1G08770.1	100	113	104	137	139	122	3.58757	-0.131481	0.523634	prenylated RAB acceptor 1.E
AT1G08780.1	151	185	194	262	246	255	4.45167	0.0688011	0.715319	ABI3-interacting protein 3
AT1G08800.1	251	201	257	313	253	310	4.45837	-0.151094	0.452167	Protein of unknown function, DUF593
AT1G08800.2	255	204	261	316	259	315	4.47999	-0.150585	0.446739	Protein of unknown function, DUF593
AT1G08810.1	68	74	96	69	105	106	3.04497	-0.221459	0.335115	myb domain protein 60
AT1G08810.2	52	53	72	49	78	83	2.68416	-0.20872	0.455054	myb domain protein 60
AT1G08820.1	318	339	365	445	420	408	5.14868	-0.141083	0.254403	vamp/synaptobrevin-associated protein 27-2
AT1G08820.2	328	341	374	456	423	417	5.17492	-0.144413	0.256854	vamp/synaptobrevin-associated protein 27-2
AT1G08830.1	200	146	207	280	237	252	4.56166	0.0176736	1	copper/zinc superoxide dismutase 1
AT1G08830.2	169	132	194	258	206	218	4.4048	0.00717236	1	copper/zinc superoxide dismutase 1
AT1G08840.1	92	91	98	98	118	119	3.49059	-0.205159	0.335039	DNA replication helicase, putative
AT1G08840.2	100	103	110	107	142	132	3.64759	-0.175694	0.384461	DNA replication helicase, putative
AT1G08845.1	44	50	48	52	76	54	2.68805	-0.102141	0.80873	Ribosomal L18p/L5e family protein
AT1G08845.2	37	45	41	44	64	45	2.4594	-0.145566	0.697015	Ribosomal L18p/L5e family protein
AT1G08860.1	2	1	1	1	1	1	-1.37621	-0.793343	0.736491	Calcium-dependent phospholipid-binding Copine family protein
AT1G08880.1	652	657	719	919	991	843	6.37	-0.0200797	0.954823	Histone superfamily protein
AT1G08890.1	114	96	88	172	101	155	3.96577	0.0622035	0.945896	Major facilitator superfamily protein
AT1G08900.1	151	131	128	102	140	99	3.5449	-0.736181	6.48e-05	Major facilitator superfamily protein
AT1G08900.2	160	137	129	106	142	105	3.61525	-0.742213	4.66e-05	Major facilitator superfamily protein
AT1G08900.3	150	128	122	103	132	100	3.55041	-0.725584	7.29e-05	Major facilitator superfamily protein
AT1G08910.1	203	223	226	228	269	271	4.74993	-0.222307	0.114336	zinc ion binding;zinc ion binding
AT1G08920.1	275	251	245	401	278	269	4.81744	-0.166407	0.433787	ERD (early response to dehydration) six-like 1
AT1G08920.2	268	234	231	381	262	252	4.72877	-0.17767	0.42387	ERD (early response to dehydration) six-like 1
AT1G08920.3	218	188	205	332	223	216	4.48902	-0.126787	0.619493	ERD (early response to dehydration) six-like 1
AT1G08930.1	451	494	396	688	554	553	5.47901	-0.0462274	0.983918	Major facilitator superfamily protein
AT1G08930.2	450	495	394	688	553	552	5.47745	-0.0457867	0.98562	Major facilitator superfamily protein
AT1G08940.1	82	85	80	108	69	68	2.95294	-0.471959	0.0615342	Phosphoglycerate mutase family protein
AT1G08960.1	112	94	137	175	176	157	3.67949	0.108861	0.635708	cation exchanger 11
AT1G08970.1	314	267	334	379	349	354	5.0788	-0.216595	0.0570535	nuclear factor Y, subunit C9
AT1G08970.2	357	306	371	410	407	391	5.24292	-0.235369	0.0234407	nuclear factor Y, subunit C9
AT1G08970.3	340	290	363	404	394	382	5.2017	-0.210139	0.0599997	nuclear factor Y, subunit C9
AT1G08970.4	328	279	349	380	386	364	5.15535	-0.218233	0.0459337	nuclear factor Y, subunit C9
AT1G08980.1	187	215	216	151	237	186	4.44619	-0.567895	9.47e-06	amidase 1
AT1G08990.1	63	76	50	172	69	95	2.88406	0.368656	0.318966	plant glycogenin-like starch initiation protein 5
AT1G09000.1	64	71	62	86	69	104	2.86382	-0.0610828	0.969413	NPK1-related protein kinase 1
AT1G09010.1	709	707	861	882	998	826	6.22218	-0.210025	0.00644793	glycoside hydrolase family 2 protein
AT1G09020.1	418	493	514	721	666	658	5.69665	0.06492	0.646719	homolog of yeast sucrose nonfermenting 4
AT1G09030.1	1	1	0	0	0	0	-2.47188	-2.87755	0.750664	nuclear factor Y, subunit B4
AT1G09040.1	45	43	64	84	84	78	2.72362	0.239115	0.422875	unknown protein
AT1G09050.1	40	48	77	72	58	71	2.68834	-0.164581	0.651915	unknown protein
AT1G09060.1	442	472	560	554	565	495	5.60908	-0.326357	6.32e-05	Zinc finger, RING-type;Transcription factor jumonji/aspartyl beta-hydroxylase
AT1G09060.2	449	481	568	565	570	507	5.6299	-0.324715	5.14e-05	Zinc finger, RING-type;Transcription factor jumonji/aspartyl beta-hydroxylase
AT1G09060.3	442	475	560	554	567	495	5.61167	-0.327577	5.55e-05	Zinc finger, RING-type;Transcription factor jumonji/aspartyl beta-hydroxylase
AT1G09070.1	625	717	757	794	837	767	6.1481	-0.265662	0.00356848	soybean gene regulated by cold-2
AT1G09080.1	5	2	13	2	7	4	0.0497121	-1.03653	0.404111	Heat shock protein 70 (Hsp 70) family protein
AT1G09080.2	6	2	14	3	7	4	0.0926196	-1.06921	0.392497	Heat shock protein 70 (Hsp 70) family protein
AT1G09090.1	49	37	51	98	38	93	2.34867	0.296987	0.564182	respiratory burst oxidase homolog B
AT1G09090.2	52	40	52	100	41	99	2.40953	0.291533	0.57187	respiratory burst oxidase homolog B
AT1G09100.1	280	276	314	405	320	337	4.84498	-0.168986	0.250479	26S proteasome AAA-ATPase subunit RPT5B
AT1G09130.1	1324	1502	1749	1787	2275	1739	7.37625	-0.116443	0.159975	ATP-dependent caseinolytic (Clp) protease/crotonase family protein
AT1G09130.2	1105	1258	1466	1491	1925	1516	7.12	-0.0931417	0.311862	ATP-dependent caseinolytic (Clp) protease/crotonase family protein
AT1G09130.3	1145	1326	1530	1543	1989	1557	7.17312	-0.111259	0.207075	ATP-dependent caseinolytic (Clp) protease/crotonase family protein
AT1G09140.1	615	688	686	847	811	774	6.16932	-0.168857	0.0307991	SERINE-ARGININE PROTEIN 30
AT1G09140.2	729	790	814	956	924	893	6.38971	-0.2095	0.00434002	SERINE-ARGININE PROTEIN 30
AT1G09150.1	229	220	298	349	406	377	4.98103	0.142932	0.234738	pseudouridine synthase and archaeosine transglycosylase (PUA) domain-containing protein
AT1G09155.1	12	6	5	15	8	11	0.121793	0.0969307	1	phloem protein 2-B15
AT1G09157.1	0	0	0	1	2	0	-2.57512	2.98083	0.481913	Protein of unknown function (DUF679)
AT1G09160.1	261	295	297	357	388	415	5.06882	-0.0139028	1	Protein phosphatase 2C family protein
AT1G09160.2	244	281	280	340	377	394	4.99374	0.00713614	1	Protein phosphatase 2C family protein
AT1G09170.1	41	28	37	75	51	48	1.75491	0.253424	0.518291	P-loop nucleoside triphosphate hydrolases superfamily protein with CH (Calponin Homology) domain
AT1G09176.1	3	1	1	7	1	3	-1.58806	0.64559	0.736491	unknown protein
AT1G09180.1	18	31	30	25	35	22	1.37306	-0.402822	0.321328	secretion-associated RAS super family 1
AT1G09190.1	15	21	21	35	37	39	1.6911	0.501775	0.139513	Tetratricopeptide repeat (TPR)-like superfamily protein
AT1G09195.1	51	54	63	57	39	54	2.3062	-0.618005	0.00553276	unknown protein
AT1G09195.2	64	69	67	78	57	62	2.57786	-0.479396	0.0091896	unknown protein
AT1G09200.1	705	800	839	1139	1217	1137	6.75319	0.117549	0.311009	Histone superfamily protein
AT1G09210.1	1545	1620	1625	2585	2449	2490	7.56765	0.191623	0.0217305	calreticulin 1b
AT1G09220.1	11	15	14	13	16	17	0.854454	-0.254258	0.720039	Pentatricopeptide repeat (PPR) superfamily protein
AT1G09230.1	180	185	232	238	208	194	4.36246	-0.356456	0.0016531	RNA-binding (RRM/RBD/RNP motifs) family protein
AT1G09240.1	40	47	54	57	49	55	2.42978	-0.262802	0.427486	nicotianamine synthase 3
AT1G09250.1	178	189	209	256	281	245	4.45594	-0.0178863	1	basic helix-loop-helix (bHLH) DNA-binding superfamily protein
AT1G09260.1	0	0	0	0	0	0	-2.68619	0	1	Chaperone DnaJ-domain superfamily protein
AT1G09270.1	697	699	741	1031	926	948	6.20322	-0.0158974	1	importin alpha isoform 4
AT1G09270.2	626	632	671	955	863	866	6.0636	0.0175567	1	importin alpha isoform 4
AT1G09270.3	661	668	701	981	888	898	6.13855	-0.0123106	1	importin alpha isoform 4
AT1G09280.1	152	188	184	210	239	232	4.288	-0.0798324	0.709343	unknown protein
AT1G09290.1	89	108	120	142	155	138	3.7076	-0.000975375	1	unknown protein
AT1G09300.1	77	86	79	134	131	107	3.47567	0.160717	0.431544	Metallopeptidase M24 family protein
AT1G09300.2	83	89	94	152	154	120	3.64111	0.219615	0.215654	Metallopeptidase M24 family protein
AT1G09310.1	5993	6791	8141	7924	10427	8032	10.1029	-0.123251	0.214218	Protein of unknown function, DUF538
AT1G09320.1	60	73	82	92	98	82	3.12529	-0.118539	0.704688	agenet domain-containing protein
AT1G09330.1	309	312	328	442	425	352	5.09837	-0.0998523	0.443752	unknown protein
AT1G09340.1	9574	10436	11838	13915	17866	13844	10.2293	0.0573453	0.592036	chloroplast RNA binding
AT1G09350.1	7	12	20	29	20	27	1.46357	0.512895	0.264301	galactinol synthase 3
AT1G09370.1	0	1	0	0	0	0	-2.08229	-2.05875	1	Plant invertase/pectin methylesterase inhibitor superfamily protein
AT1G09380.1	4	3	3	3	2	4	-1.4468	-0.587484	0.763948	nodulin MtN21 /EamA-like transporter family protein
AT1G09390.1	153	151	172	144	190	138	3.91836	-0.473024	0.000325344	GDSL-like Lipase/Acylhydrolase superfamily protein
AT1G09400.1	7	3	3	1	2	1	-1.41049	-2.05154	0.0428379	FMN-linked oxidoreductases superfamily protein
AT1G09410.1	10	9	10	13	17	15	0.558644	0.173076	0.939518	pentatricopeptide (PPR) repeat-containing protein
AT1G09415.1	86	118	117	88	126	97	3.31616	-0.503836	0.00120133	NIM1-interacting 3
AT1G09420.1	66	91	75	132	110	93	3.31569	0.0701133	0.888387	glucose-6-phosphate dehydrogenase 4
AT1G09420.2	64	88	75	129	107	92	3.28379	0.0717695	0.878038	glucose-6-phosphate dehydrogenase 4
AT1G09430.1	562	562	686	823	785	753	5.89061	-0.0727241	0.581253	ATP-citrate lyase A-3
AT1G09440.1	98	121	119	95	142	113	3.40503	-0.409527	0.0169936	Protein kinase superfamily protein
AT1G09450.1	51	59	53	71	79	68	2.72328	-0.0400705	0.997527	Protein kinase superfamily protein
AT1G09460.1	39	46	30	69	49	74	2.24409	0.280237	0.425267	Carbohydrate-binding X8 domain superfamily protein
AT1G09470.1	62	74	76	95	134	107	3.28725	0.20416	0.404502	unknown protein
AT1G09470.2	62	69	73	94	118	104	3.19593	0.171931	0.531209	unknown protein
AT1G09480.1	10	15	18	14	19	18	0.960609	-0.207328	0.818136	NAD(P)-binding Rossmann-fold superfamily protein
AT1G09483.1	3	4	3	12	11	3	-0.41102	0.896828	0.301119	unknown protein
AT1G09486.1	96	94	105	167	180	186	3.75053	0.394938	0.00491183	pseudogene
AT1G09490.1	295	352	397	279	393	319	5.01093	-0.532847	4.02e-07	NAD(P)-binding Rossmann-fold superfamily protein
AT1G09490.2	261	302	343	231	321	273	4.78597	-0.59262	1.15e-08	NAD(P)-binding Rossmann-fold superfamily protein
AT1G09500.1	80	147	260	21	35	17	2.42465	-3.16272	4.66e-17	NAD(P)-binding Rossmann-fold superfamily protein
AT1G09500.2	71	156	255	20	32	18	2.38547	-3.20453	1.29e-15	NAD(P)-binding Rossmann-fold superfamily protein
AT1G09500.3	65	114	215	19	27	14	2.09726	-3.13529	6.91e-16	NAD(P)-binding Rossmann-fold superfamily protein
AT1G09510.1	1	4	4	0	0	0	-2.47124	-4.87791	0.0140629	NAD(P)-binding Rossmann-fold superfamily protein
AT1G09520.1	86	110	102	144	125	157	3.66122	0.0591453	0.855576	unknown protein
AT1G09530.1	115	106	135	130	172	138	3.69616	-0.153645	0.405368	phytochrome interacting factor 3
AT1G09530.2	110	104	134	128	165	137	3.67197	-0.153395	0.410053	phytochrome interacting factor 3
AT1G09540.1	30	19	15	54	20	27	1.16372	0.188725	0.821602	myb domain protein 61
AT1G09560.1	860	879	796	2075	881	1154	6.52001	0.238544	0.484218	germin-like protein 5
AT1G09570.1	683	780	852	1170	1081	1103	6.34025	0.0799157	0.425123	phytochrome A
AT1G09570.2	658	761	817	1114	1026	1066	6.28809	0.0650312	0.560362	phytochrome A
AT1G09575.1	16	23	27	30	26	28	1.21567	-0.106318	0.967705	Protein of unknown function (DUF607)
AT1G09580.1	102	103	118	178	160	188	3.74166	0.24705	0.122183	emp24/gp25L/p24 family/GOLD family protein
AT1G09590.1	1883	2140	2195	3953	3963	4051	8.25733	0.488136	2.19e-12	Translation protein SH3-like family protein
AT1G09600.1	12	17	18	42	37	39	1.40525	0.86661	0.00458939	Protein kinase superfamily protein
AT1G09610.1	10	14	10	23	14	16	0.555054	0.180698	0.944965	Protein of unknown function (DUF579)
AT1G09620.1	1293	1313	1496	2318	2532	2282	7.37155	0.338808	1.15e-08	ATP binding;leucine-tRNA ligases;aminoacyl-tRNA ligases;nucleotide binding;ATP binding;aminoacyl-tRNA ligases
AT1G09630.1	118	176	188	264	255	258	4.30965	0.235313	0.0893138	RAB GTPase 11C
AT1G09640.1	1580	1665	1837	3014	2834	2798	7.75606	0.309741	3.44e-07	Translation elongation factor EF1B, gamma chain
AT1G09640.2	909	983	1091	1828	1665	1682	6.9837	0.339204	1.34e-06	Translation elongation factor EF1B, gamma chain
AT1G09645.1	117	131	138	173	152	159	3.70634	-0.130528	0.528872	unknown protein
AT1G09650.1	6	8	6	4	6	8	-0.285766	-0.598737	0.499698	F-box and associated interaction domains-containing protein
AT1G09660.1	262	265	319	409	407	415	5.23337	0.0845913	0.541129	RNA-binding KH domain-containing protein
AT1G09660.2	244	244	292	372	368	391	5.11788	0.0797679	0.600805	RNA-binding KH domain-containing protein
AT1G09665.1	0	0	0	0	0	0	-2.7153	0	1	Toll-Interleukin-Resistance (TIR) domain family protein
AT1G09680.1	15	8	16	18	25	24	0.842791	0.319809	0.604267	Pentatricopeptide repeat (PPR) superfamily protein
AT1G09690.1	2666	3123	3193	5129	5412	5341	8.70499	0.365843	3.64e-08	Translation protein SH3-like family protein
AT1G09700.1	153	169	191	230	277	233	4.67467	0.0697906	0.766458	dsRNA-binding domain-like superfamily protein
AT1G09710.1	53	61	60	77	79	71	3.01451	-0.075349	0.887746	Homeodomain-like superfamily protein
AT1G09710.2	44	57	52	70	68	66	2.88062	-0.0430801	1	Homeodomain-like superfamily protein
AT1G09720.1	0	0	0	0	0	0	-2.71531	0	1	Kinase interacting (KIP1-like) family protein
AT1G09730.1	292	343	285	446	404	397	5.09272	-0.0227159	0.99394	Cysteine proteinases superfamily protein
AT1G09730.2	298	352	293	458	414	401	5.12243	-0.0286603	0.957389	Cysteine proteinases superfamily protein
AT1G09740.1	396	427	383	748	366	546	5.32608	0.00644734	1	Adenine nucleotide alpha hydrolases-like superfamily protein
AT1G09750.1	769	884	954	1436	2047	1425	6.91275	0.448572	4.19e-06	Eukaryotic aspartyl protease family protein
AT1G09760.1	415	463	485	576	597	609	5.71301	-0.0706653	0.551054	U2 small nuclear ribonucleoprotein A
AT1G09770.1	868	975	1038	1456	1428	1489	6.81273	0.146401	0.0570451	cell division cycle 5
AT1G09780.1	1398	1570	1610	3400	2703	3151	7.65077	0.562068	3.01e-10	Phosphoglycerate mutase, 2,3-bisphosphoglycerate-independent
AT1G09790.1	4	0	1	0	1	1	-2.28526	-1.59552	0.553652	COBRA-like protein 6 precursor
AT1G09794.1	22	35	19	39	37	34	1.64335	0.071851	1	Cox19 family protein (CHCH motif)
AT1G09795.1	358	449	453	705	827	755	5.90968	0.402445	1.27e-05	ATP phosphoribosyl transferase 2
AT1G09800.1	33	49	51	62	62	71	2.74037	0.0964745	0.820664	Pseudouridine synthase family protein
AT1G09810.1	89	84	104	112	134	143	3.60244	0.0320881	0.990075	evolutionarily conserved C-terminal region 11
AT1G09812.1	9	7	8	6	7	10	-0.0963321	-0.511826	0.494593	unknown protein
AT1G09815.1	161	164	198	238	242	227	4.48609	-0.0229228	1	polymerase delta 4
AT1G09820.1	68	71	71	89	96	85	2.99269	-0.0968545	0.751774	Pentatricopeptide repeat (PPR-like) superfamily protein
AT1G09830.1	267	294	337	513	621	532	5.49417	0.433036	1.78e-06	Glycinamide ribonucleotide (GAR) synthetase
AT1G09840.1	377	429	450	574	509	511	5.47272	-0.113122	0.290273	shaggy-like protein kinase 41
AT1G09840.2	368	423	437	557	486	489	5.43111	-0.137827	0.191728	shaggy-like protein kinase 41
AT1G09840.3	367	421	432	551	477	488	5.41933	-0.143479	0.176369	shaggy-like protein kinase 41
AT1G09840.4	362	418	430	545	482	482	5.41199	-0.138491	0.185753	shaggy-like protein kinase 41
AT1G09840.5	363	416	429	543	474	481	5.4072	-0.146509	0.162307	shaggy-like protein kinase 41
AT1G09840.6	362	416	429	543	474	480	5.40651	-0.146255	0.1636	shaggy-like protein kinase 41
AT1G09850.1	235	262	292	368	356	399	4.97069	0.0543292	0.781975	xylem bark cysteine peptidase 3
AT1G09860.1	1	4	0	1	2	0	-1.56194	-1.0942	0.538045	purine permease 16
AT1G09870.1	200	240	278	317	314	279	4.64236	-0.1152	0.365852	histidine acid phosphatase family protein
AT1G09880.1	9	14	15	24	18	22	0.75175	0.302327	0.750664	Rhamnogalacturonate lyase family protein
AT1G09890.1	46	49	53	55	62	54	2.13965	-0.25003	0.395309	Rhamnogalacturonate lyase family protein
AT1G09900.1	170	166	213	275	354	287	4.73084	0.27932	0.034413	Pentatricopeptide repeat (PPR-like) superfamily protein
AT1G09910.1	135	154	181	196	177	168	3.92767	-0.253178	0.0816305	Rhamnogalacturonate lyase family protein
AT1G09920.1	263	277	302	337	331	268	4.81213	-0.307645	0.0147676	TRAF-type zinc finger-related
AT1G09930.1	0	2	0	0	0	1	-2.22162	-1.14927	1	oligopeptide transporter 2
AT1G09932.1	38	44	36	25	39	45	2.00416	-0.574048	0.200212	Phosphoglycerate mutase family protein
AT1G09932.2	36	43	33	23	38	39	1.92719	-0.625725	0.153166	Phosphoglycerate mutase family protein
AT1G09940.1	159	168	159	253	244	221	4.15365	0.102721	0.56883	Glutamyl-tRNA reductase family protein
AT1G09950.1	2	5	6	8	4	10	-0.341386	0.302785	0.862755	RESPONSE TO ABA AND SALT 1
AT1G09960.1	66	91	89	124	97	99	3.03341	-0.075693	0.891655	sucrose transporter 4
AT1G09970.1	1329	1436	1474	1954	1439	1605	6.94741	-0.217901	0.0962059	Leucine-rich receptor-like protein kinase family protein
AT1G09970.2	1281	1371	1430	1890	1393	1568	6.89804	-0.206043	0.121936	Leucine-rich receptor-like protein kinase family protein
AT1G09980.1	323	390	397	493	490	471	5.34399	-0.0676612	0.663151	Putative serine esterase family protein
AT1G09980.2	319	382	397	481	480	461	5.32085	-0.0838437	0.545263	Putative serine esterase family protein
AT1G09995.1	25	29	32	35	30	46	1.60828	-0.0881922	0.978383	DNA repair DEAD helicase RAD3/XP-D subfamily protein
AT1G10000.1	7	9	3	5	15	4	-0.329924	-0.139443	0.985834	Ribonuclease H-like superfamily protein
AT1G10010.1	1	0	0	1	0	0	-2.472	-0.337117	1	amino acid permease 8
AT1G10020.1	124	136	160	214	221	188	3.74288	0.111003	0.595341	Protein of unknown function (DUF1005)
AT1G10030.1	105	127	124	218	180	208	3.90869	0.311892	0.0585611	homolog of yeast ergosterol28
AT1G10040.1	43	46	36	53	43	57	2.10869	-0.167534	0.71844	alpha/beta-Hydrolases superfamily protein
AT1G10040.2	39	43	32	48	41	52	1.98782	-0.153131	0.751241	alpha/beta-Hydrolases superfamily protein
AT1G10050.1	143	158	141	240	150	198	3.94108	-0.0446845	0.989084	glycosyl hydrolase family 10 protein / carbohydrate-binding domain-containing protein
AT1G10060.1	95	99	92	82	140	91	3.97438	-0.336552	0.107052	branched-chain amino acid transaminase 1
AT1G10060.2	108	106	98	97	152	101	4.13644	-0.300474	0.109027	branched-chain amino acid transaminase 1
AT1G10060.3	98	95	84	88	133	90	3.97565	-0.298778	0.121231	branched-chain amino acid transaminase 1
AT1G10070.1	32	41	41	28	28	27	1.68062	-0.910913	0.00867998	branched-chain amino acid transaminase 2
AT1G10070.2	32	41	41	28	27	27	1.65965	-0.927854	0.00759089	branched-chain amino acid transaminase 2
AT1G10070.3	31	39	41	27	27	27	1.63523	-0.906393	0.0102517	branched-chain amino acid transaminase 2
AT1G10090.1	237	244	239	329	302	326	4.98389	-0.0484233	0.834409	Early-responsive to dehydration stress protein (ERD4)
AT1G10095.1	90	108	75	156	126	117	3.65646	0.0797063	0.953277	Protein prenylyltransferase superfamily protein
AT1G10100.1	0	0	0	0	0	0	-2.60218	0	1	unknown protein
AT1G10110.1	3	7	7	7	9	9	-0.101972	0.0968576	1	F-box family protein
AT1G10120.1	208	224	237	289	255	263	4.48282	-0.186903	0.156572	basic helix-loop-helix (bHLH) DNA-binding superfamily protein
AT1G10130.1	432	485	521	672	637	650	5.69472	-0.0102815	1	endoplasmic reticulum-type calcium-transporting ATPase 3
AT1G10140.1	79	82	76	110	89	74	3.04212	-0.257297	0.254665	Uncharacterised conserved protein UCP031279
AT1G10150.1	185	192	220	168	211	163	4.15131	-0.598828	1.58e-07	Carbohydrate-binding protein
AT1G10155.1	12	17	20	6	7	2	0.161424	-2.13399	1.45e-06	phloem protein 2-A10
AT1G10170.1	383	439	487	641	642	638	5.58478	0.0977412	0.394766	NF-X-like 1
AT1G10180.1	285	275	298	382	410	398	5.01571	0.012405	1	unknown protein
AT1G10200.1	378	379	416	632	577	618	5.83004	0.181979	0.051477	GATA type zinc finger transcription factor family protein
AT1G10210.1	45	43	57	56	49	66	2.40985	-0.216753	0.500954	mitogen-activated protein kinase 1
AT1G10210.2	43	44	56	51	46	61	2.36967	-0.310833	0.258488	mitogen-activated protein kinase 1
AT1G10220.1	6	6	6	3	3	5	-0.88615	-1.13802	0.145906	unknown protein
AT1G10220.2	1	0	1	0	1	0	-2.39926	-1.15121	1	unknown protein
AT1G10230.1	68	71	108	105	147	129	3.54597	0.170467	0.478066	SKP1-like 18
AT1G10240.1	94	97	123	115	127	130	3.55893	-0.212023	0.250286	FAR1-related sequence 11
AT1G10250.1	3	4	5	7	5	4	-0.297135	-0.0408864	1	unknown protein
AT1G10270.1	104	151	130	259	257	258	4.40423	0.549979	1.17e-05	glutamine-rich protein 23
AT1G10280.1	49	83	69	80	100	81	2.75168	-0.0816002	0.88929	Core-2/I-branching beta-1,6-N-acetylglucosaminyltransferase family protein
AT1G10290.1	839	972	1011	1513	1515	1454	6.78036	0.210395	0.0050253	dynamin-like protein 6
AT1G10300.1	13	24	18	28	21	39	0.921046	0.226425	0.745359	Nucleolar GTP-binding protein
AT1G10310.1	196	219	235	281	313	247	4.67813	-0.0880625	0.605063	NAD(P)-binding Rossmann-fold superfamily protein
AT1G10320.1	131	127	159	154	184	174	3.9663	-0.161289	0.413073	Zinc finger C-x8-C-x5-C-x3-H type family protein
AT1G10330.1	15	16	20	25	27	22	1.20921	0.0784821	1	Tetratricopeptide repeat (TPR)-like superfamily protein
AT1G10340.1	33	36	38	45	10	32	1.32698	-0.736141	0.243403	Ankyrin repeat family protein
AT1G10340.2	29	31	36	43	9	30	1.24146	-0.662281	0.326129	Ankyrin repeat family protein
AT1G10350.1	131	135	168	189	182	190	3.99573	-0.0861841	0.705229	DNAJ heat shock family protein
AT1G10360.1	324	354	373	433	470	397	5.26492	-0.152792	0.11998	glutathione S-transferase TAU 18
AT1G10370.1	887	995	1257	1259	1545	1129	6.77068	-0.131696	0.255312	Glutathione S-transferase family protein
AT1G10380.1	195	163	172	183	127	148	4.04816	-0.672148	0.000128652	Putative membrane lipoprotein
AT1G10385.1	1	2	0	4	3	6	-1.67115	1.56072	0.300552	Vps51/Vps67 family (components of vesicular transport) protein
AT1G10390.1	742	753	767	1157	1075	1106	6.50539	0.101684	0.36333	Nucleoporin autopeptidase
AT1G10390.2	745	756	770	1169	1075	1110	6.513	0.102933	0.356534	Nucleoporin autopeptidase
AT1G10400.1	10	9	5	9	11	16	-0.0427188	0.121144	1	UDP-Glycosyltransferase superfamily protein
AT1G10410.1	376	384	401	518	409	439	5.52982	-0.223249	0.045446	Protein of unknown function (DUF1336)
AT1G10417.1	10	10	3	10	8	11	0.450617	-0.128629	1	unknown protein
AT1G10430.1	183	223	250	323	312	324	4.63629	0.0925176	0.535603	protein phosphatase 2A-2
AT1G10450.1	301	296	303	426	406	379	5.05873	-0.032078	0.901574	SIN3-like 6
AT1G10455.1	0	0	0	0	0	1	-2.65753	1.72588	1	unknown protein
AT1G10460.1	18	6	22	31	18	27	0.828336	0.271914	0.711935	germin-like protein 7
AT1G10470.1	997	974	1106	1619	1234	1273	6.82867	-0.0336167	0.940362	response regulator 4
AT1G10480.1	57	61	46	68	34	62	2.46314	-0.456815	0.16473	zinc finger protein 5
AT1G10490.1	421	432	449	640	685	631	5.77306	0.126838	0.224495	Domain of unknown function (DUF1726) ;Putative ATPase (DUF699)
AT1G10500.1	549	618	752	644	721	566	5.95278	-0.447909	6.68e-09	chloroplast-localized ISCA-like protein
AT1G10510.1	464	481	550	721	910	720	5.9754	0.192339	0.0250059	RNI-like superfamily protein
AT1G10520.1	27	22	17	25	31	21	1.47622	-0.239749	0.597229	DNA polymerase lambda (POLL)
AT1G10522.1	166	182	183	289	438	345	4.93788	0.550588	2.32e-06	unknown protein
AT1G10522.2	177	209	191	323	463	356	5.0383	0.52131	3.66e-06	unknown protein
AT1G10530.1	21	15	16	36	26	29	0.93507	0.346495	0.438637	unknown protein
AT1G10540.1	10	9	10	6	11	10	0.403712	-0.55453	0.392388	nucleobase-ascorbate transporter 8
AT1G10550.1	10	11	22	22	11	18	-0.259581	-0.193959	0.947212	xyloglucan:xyloglucosyl transferase 33
AT1G10560.1	24	18	19	56	13	29	1.06577	0.227805	0.760873	plant U-box 18
AT1G10570.1	177	192	190	210	225	216	4.34986	-0.239406	0.0656585	Cysteine proteinases superfamily protein
AT1G10570.2	179	190	189	213	227	215	4.35224	-0.228251	0.082613	Cysteine proteinases superfamily protein
AT1G10580.1	327	368	440	537	539	547	5.435	0.0611227	0.648359	Transducin/WD40 repeat-like superfamily protein
AT1G10585.1	9	44	95	8	13	6	0.459646	-2.84366	2.19e-05	basic helix-loop-helix (bHLH) DNA-binding superfamily protein
AT1G10586.1	0	0	0	0	0	0	-2.68619	0	1	basic helix-loop-helix (bHLH) DNA-binding superfamily protein
AT1G10586.2	0	0	0	0	0	0	-2.68619	0	1	basic helix-loop-helix (bHLH) DNA-binding superfamily protein
AT1G10590.1	591	579	703	865	907	923	6.2351	0.0686988	0.536579	Nucleic acid-binding, OB-fold-like protein
AT1G10590.2	575	560	678	839	875	899	6.19539	0.0710482	0.526148	Nucleic acid-binding, OB-fold-like protein
AT1G10590.3	575	560	678	836	875	896	6.19284	0.0676634	0.552686	Nucleic acid-binding, OB-fold-like protein
AT1G10600.1	114	119	148	120	174	132	3.90111	-0.297888	0.0808584	associated molecule with the SH3 domain of STAM 2
AT1G10600.2	103	107	127	109	151	117	3.74611	-0.29748	0.0888274	associated molecule with the SH3 domain of STAM 2
AT1G10600.3	105	115	139	114	161	124	3.78633	-0.306105	0.0929976	associated molecule with the SH3 domain of STAM 2
AT1G10610.1	68	66	90	90	76	77	3.06172	-0.337582	0.122489	basic helix-loop-helix (bHLH) DNA-binding superfamily protein
AT1G10620.1	0	0	0	0	1	1	-2.57507	2.48717	0.750664	Protein kinase superfamily protein
AT1G10630.1	457	503	544	886	704	784	5.99223	0.204158	0.037132	ADP-ribosylation factor A1F
AT1G10640.1	419	456	461	365	542	460	5.47503	-0.429968	0.000540788	Pectin lyase-like superfamily protein
AT1G10650.1	232	250	292	271	313	287	4.70585	-0.287463	0.00284582	SBP (S-ribonuclease binding protein) family protein
AT1G10650.2	219	238	282	254	298	274	4.63739	-0.296965	0.00294358	SBP (S-ribonuclease binding protein) family protein
AT1G10657.1	80	86	104	101	124	114	3.35629	-0.129397	0.595341	Plant protein 1589 of unknown function
AT1G10657.2	94	102	114	111	150	136	3.5664	-0.101551	0.663741	Plant protein 1589 of unknown function
AT1G10657.3	84	101	116	113	141	131	3.54312	-0.102273	0.674477	Plant protein 1589 of unknown function
AT1G10657.4	70	85	93	96	122	109	3.29584	-0.0590831	0.911318	Plant protein 1589 of unknown function
AT1G10660.1	229	284	317	308	347	266	4.85837	-0.307621	0.00564743	unknown protein
AT1G10660.2	235	288	319	308	355	259	4.86431	-0.327667	0.0036885	unknown protein
AT1G10660.3	233	284	314	307	353	258	4.85107	-0.315076	0.00498061	unknown protein
AT1G10660.4	233	282	313	302	350	258	4.8439	-0.322444	0.00372359	unknown protein
AT1G10670.1	1806	1885	2080	2971	2999	2838	7.82994	0.151747	0.00736254	ATP-citrate lyase A-1
AT1G10670.2	1753	1852	2047	2903	2919	2773	7.80131	0.146957	0.00968077	ATP-citrate lyase A-1
AT1G10670.3	1706	1795	1961	2843	2866	2687	7.76004	0.161774	0.00386482	ATP-citrate lyase A-1
AT1G10670.4	1746	1842	2037	2887	2911	2760	7.79652	0.147572	0.00897748	ATP-citrate lyase A-1
AT1G10680.1	5	7	1	10	9	5	-0.693404	0.412524	0.772991	P-glycoprotein 10
AT1G10690.1	22	20	22	26	22	22	1.29912	-0.327508	0.450018	unknown protein
AT1G10700.1	164	178	184	282	255	250	4.29847	0.122996	0.427655	phosphoribosyl pyrophosphate (PRPP) synthase 3
AT1G10710.1	1	3	2	3	4	6	-0.96465	0.63221	0.747936	poor homologous synapsis 1
AT1G10710.2	2	4	3	3	5	6	-0.838908	0.174121	1	poor homologous synapsis 1
AT1G10720.1	186	190	211	233	238	240	4.36866	-0.181623	0.135601	BSD domain-containing protein
AT1G10730.1	55	56	64	82	83	87	2.77307	0.068136	0.904882	Clathrin adaptor complexes medium subunit family protein
AT1G10740.1	298	311	365	321	414	348	4.87853	-0.305728	0.000764874	alpha/beta-Hydrolases superfamily protein
AT1G10740.2	287	303	347	306	405	325	4.81712	-0.314584	0.000871695	alpha/beta-Hydrolases superfamily protein
AT1G10740.3	286	296	346	307	400	325	4.79331	-0.306022	0.00125562	alpha/beta-Hydrolases superfamily protein
AT1G10740.4	284	296	345	306	397	321	4.78382	-0.312554	0.000908556	alpha/beta-Hydrolases superfamily protein
AT1G10750.1	26	26	42	46	52	55	2.13287	0.245762	0.444821	Protein of Unknown Function (DUF239)
AT1G10760.1	961	1199	1334	1808	1921	1652	7.86655	0.167975	0.0353327	Pyruvate phosphate dikinase, PEP/pyruvate binding domain
AT1G10770.1	0	0	0	0	0	0	-1.6443	0	1	Plant invertase/pectin methylesterase inhibitor superfamily protein
AT1G10780.1	70	79	80	94	123	110	3.26189	0.0545435	0.946284	F-box/RNI-like superfamily protein
AT1G10790.1	10	5	17	18	8	8	-0.080736	-0.359615	0.706195	unknown protein
AT1G10800.1	3	3	10	8	10	6	-0.509296	0.127189	1	unknown protein
AT1G10810.1	8	23	25	37	21	26	1.02377	0.133588	0.873447	NAD(P)-linked oxidoreductase superfamily protein
AT1G10820.1	151	171	195	219	242	213	4.43157	-0.0754383	0.695648	Protein of unknown function (DUF3755)
AT1G10820.2	154	188	220	234	255	220	4.51496	-0.121849	0.417245	Protein of unknown function (DUF3755)
AT1G10830.1	225	246	283	343	381	309	4.76781	-0.0045199	1	15-cis-zeta-carotene isomerase
AT1G10830.2	210	222	256	315	348	286	4.62738	0.00508984	1	15-cis-zeta-carotene isomerase
AT1G10840.1	735	759	781	1190	1281	1227	6.52463	0.240735	0.00064444	translation initiation factor 3 subunit H1
AT1G10840.2	611	657	673	1027	1080	1056	6.30552	0.24561	0.000436227	translation initiation factor 3 subunit H1
AT1G10850.1	294	298	332	468	455	451	5.31044	0.114329	0.286123	Leucine-rich repeat protein kinase family protein
AT1G10865.1	99	109	102	145	154	138	3.58593	0.0355005	1	unknown protein
AT1G10865.2	79	82	88	114	117	110	3.27221	-0.00512294	1	unknown protein
AT1G10870.1	255	272	293	336	343	337	4.82786	-0.148836	0.210773	ARF-GAP domain 4
AT1G10880.1	0	0	0	0	0	0	-2.65762	0	1	Core-2/I-branching beta-1,6-N-acetylglucosaminyltransferase family protein
AT1G10890.1	306	307	295	307	357	315	5.05244	-0.354259	0.000822609	unknown protein
AT1G10900.1	742	794	847	962	926	764	6.29725	-0.306445	0.000260035	Phosphatidylinositol-4-phosphate 5-kinase family protein
AT1G10910.1	366	389	427	422	559	435	5.43682	-0.20041	0.0377533	Pentatricopeptide repeat (PPR) superfamily protein
AT1G10920.1	99	98	124	81	105	93	3.34536	-0.659465	2.71e-05	NB-ARC domain-containing disease resistance protein
AT1G10920.2	98	98	123	81	105	93	3.33743	-0.650447	4.26e-05	NB-ARC domain-containing disease resistance protein
AT1G10930.1	219	242	273	413	457	375	5.2139	0.303222	0.00507707	DNA helicase (RECQl4A)
AT1G10940.1	532	558	630	645	721	635	6.0058	-0.24056	0.00444826	Protein kinase superfamily protein
AT1G10940.2	497	517	572	590	671	591	5.89721	-0.235912	0.00885476	Protein kinase superfamily protein
AT1G10950.1	968	1115	1139	1901	1658	1659	6.9235	0.239109	0.00247103	transmembrane nine 1
AT1G10960.1	3182	3513	4282	5655	7281	5494	8.75317	0.289183	0.000469126	ferredoxin 1
AT1G10970.1	42	52	54	110	101	71	2.77381	0.469402	0.0469996	zinc transporter 4 precursor
AT1G10980.1	8	6	8	7	12	10	-0.0932142	-0.0597841	1	Lung seven transmembrane receptor family protein
AT1G10990.1	35	30	25	36	34	40	1.38188	-0.17248	0.765553	unknown protein
AT1G10990.2	33	28	24	38	34	39	1.42177	-0.0754066	0.986418	unknown protein
AT1G11000.1	83	67	67	148	109	114	3.26535	0.311691	0.148851	Seven transmembrane MLO family protein
AT1G11020.1	116	120	132	167	133	133	3.66379	-0.22278	0.231725	RING/FYVE/PHD zinc finger superfamily protein
AT1G11040.1	0	0	0	1	0	1	-2.62953	2.48916	0.750664	HSP40/DnaJ peptide-binding protein
AT1G11050.1	117	122	136	120	115	128	3.4838	-0.504198	0.000166725	Protein kinase superfamily protein
AT1G11055.1	3	4	2	1	4	4	-1.19063	-0.441576	0.877727	pseudogene
AT1G11060.1	186	164	168	232	210	214	4.26596	-0.119822	0.457171	WAPL (Wings apart-like protein regulation of heterochromatin) protein
AT1G11070.1	12	13	14	11	14	5	0.230392	-0.83415	0.166618	unknown protein
AT1G11080.1	238	269	178	261	154	237	4.02978	-0.533985	0.0298211	serine carboxypeptidase-like 31
AT1G11080.2	225	239	164	237	141	225	3.89744	-0.521425	0.0336153	serine carboxypeptidase-like 31
AT1G11090.1	109	130	157	137	178	129	3.77366	-0.292807	0.0624308	alpha/beta-Hydrolases superfamily protein
AT1G11100.1	39	46	25	62	34	42	1.8814	-0.138773	0.869607	SNF2 domain-containing protein / helicase domain-containing protein / zinc finger protein-related
AT1G11100.2	38	49	28	63	37	44	1.9467	-0.138647	0.831373	SNF2 domain-containing protein / helicase domain-containing protein / zinc finger protein-related
AT1G11110.1	0	0	0	1	0	0	-2.52281	1.72437	1	LisH and RanBPM domains containing protein
AT1G11112.1	12	16	17	12	21	20	0.906351	-0.220342	0.79735	unknown protein
AT1G11120.1	17	28	20	43	31	35	1.35757	0.287192	0.504925	unknown protein
AT1G11120.2	22	39	32	54	35	44	1.73172	0.0622108	1	unknown protein
AT1G11125.1	12	11	19	17	19	22	0.650229	0.00973773	1	unknown protein
AT1G11130.1	302	330	374	476	452	400	5.24401	-0.0569694	0.754042	Leucine-rich repeat protein kinase family protein
AT1G11145.1	0	1	0	0	0	0	-2.68607	-2.05912	1	Protein of unknown function (DUF674)
AT1G11160.1	66	57	58	125	77	97	2.70375	0.265256	0.315074	Transducin/WD40 repeat-like superfamily protein
AT1G11170.1	38	52	41	40	30	48	1.85468	-0.603982	0.0479369	Protein of unknown function (DUF707)
AT1G11170.2	34	53	36	31	29	47	1.75155	-0.654294	0.0421626	Protein of unknown function (DUF707)
AT1G11180.1	73	83	102	76	101	80	3.46854	-0.462835	0.00829182	Secretory carrier membrane protein (SCAMP) family protein
AT1G11180.2	65	78	96	69	95	74	3.35775	-0.462773	0.0139181	Secretory carrier membrane protein (SCAMP) family protein
AT1G11190.1	68	92	79	90	79	73	2.89063	-0.440225	0.0511618	bifunctional nuclease i
AT1G11200.1	97	106	102	141	125	146	3.57054	-0.0239139	1	Protein of unknown function (DUF300)
AT1G11210.1	10	12	14	15	5	19	1.13526	-0.333313	0.713528	Protein of unknown function (DUF761)
AT1G11220.1	16	22	22	27	36	45	1.57467	0.390925	0.329307	Protein of unknown function (DUF761)
AT1G11230.1	0	0	0	0	0	0	-2.71531	0	1	Protein of unknown function (DUF761)
AT1G11230.2	0	0	0	0	0	0	-2.71531	0	1	Protein of unknown function (DUF761)
AT1G11240.1	197	234	215	336	343	312	4.88012	0.15763	0.221465	unknown protein
AT1G11250.1	0	0	2	0	3	2	-1.95497	0.773557	0.907793	syntaxin of plants 125
AT1G11260.1	792	731	714	646	618	590	5.97898	-0.736694	1.93e-15	sugar transporter 1
AT1G11270.1	28	42	33	53	44	55	2.14211	0.104125	0.872596	F-box and associated interaction domains-containing protein
AT1G11270.2	34	35	35	59	45	58	2.2311	0.181152	0.630306	F-box and associated interaction domains-containing protein
AT1G11270.3	30	29	27	42	32	52	1.93589	0.0937333	0.921231	F-box and associated interaction domains-containing protein
AT1G11280.1	294	302	350	418	390	360	5.12506	-0.153735	0.149842	S-locus lectin protein kinase family protein
AT1G11280.2	300	304	361	430	399	371	5.15293	-0.143129	0.190981	S-locus lectin protein kinase family protein
AT1G11280.3	279	293	342	413	377	357	5.08648	-0.129558	0.268467	S-locus lectin protein kinase family protein
AT1G11280.4	273	291	331	401	368	346	5.05729	-0.140399	0.216784	S-locus lectin protein kinase family protein
AT1G11290.1	44	61	62	61	75	76	2.70342	-0.111826	0.805575	Pentatricopeptide repeat (PPR) superfamily protein
AT1G11300.1	143	164	150	159	189	145	4.06055	-0.351823	0.00894088	protein serine/threonine kinases;protein kinases;ATP binding;sugar binding;kinases;carbohydrate binding
AT1G11310.1	950	959	964	1270	1084	1092	6.55249	-0.198532	0.0565511	Seven transmembrane MLO family protein
AT1G11310.2	890	896	914	1201	1014	1036	6.466	-0.192244	0.075384	Seven transmembrane MLO family protein
AT1G11320.1	30	38	51	51	58	56	2.22397	0.0170491	1	unknown protein
AT1G11330.1	147	176	199	203	180	199	3.86903	-0.295793	0.0678748	S-locus lectin protein kinase family protein
AT1G11330.2	152	177	205	208	184	202	3.89405	-0.299199	0.0599588	S-locus lectin protein kinase family protein
AT1G11340.1	22	23	17	15	24	21	1.17906	-0.504472	0.182746	S-locus lectin protein kinase family protein
AT1G11350.1	149	130	172	221	237	189	4.18536	0.061261	0.816226	S-domain-1 13
AT1G11360.1	191	215	198	265	263	218	4.44627	-0.156517	0.261609	Adenine nucleotide alpha hydrolases-like superfamily protein
AT1G11360.2	170	195	183	243	238	200	4.27836	-0.146879	0.324482	Adenine nucleotide alpha hydrolases-like superfamily protein
AT1G11360.3	183	210	189	261	254	210	4.38141	-0.144717	0.366093	Adenine nucleotide alpha hydrolases-like superfamily protein
AT1G11360.4	179	202	187	258	252	208	4.33834	-0.12306	0.447838	Adenine nucleotide alpha hydrolases-like superfamily protein
AT1G11370.1	0	0	0	0	1	0	-2.62964	1.72174	1	Pectin lyase-like superfamily protein
AT1G11380.1	67	55	77	87	89	65	2.86834	-0.182456	0.435014	PLAC8 family protein
AT1G11390.1	158	174	176	311	291	289	4.36005	0.352217	0.0014927	Protein kinase superfamily protein
AT1G11400.1	140	146	195	179	204	193	4.12947	-0.196978	0.147325	partner of Y14-MAGO
AT1G11400.2	159	157	210	197	219	212	4.25041	-0.201239	0.1263	partner of Y14-MAGO
AT1G11400.3	133	143	191	169	191	176	4.06589	-0.258116	0.0475404	partner of Y14-MAGO
AT1G11410.1	298	303	390	289	387	301	5.1023	-0.478773	3.4e-06	S-locus lectin protein kinase family protein
AT1G11420.1	51	50	61	77	64	63	2.51032	-0.124487	0.77106	DOMAIN OF UNKNOWN FUNCTION 724 2
AT1G11430.1	747	802	926	1217	1577	1275	6.83075	0.257282	0.0018185	plastid developmental protein DAG, putative
AT1G11440.1	105	110	143	125	150	106	3.55257	-0.368335	0.0184005	unknown protein
AT1G11450.1	75	86	99	89	69	77	3.00955	-0.600848	0.000673607	nodulin MtN21 /EamA-like transporter family protein
AT1G11450.2	63	69	83	68	59	63	2.73035	-0.634109	0.000652998	nodulin MtN21 /EamA-like transporter family protein
AT1G11460.1	10	9	12	9	10	12	0.655951	-0.452799	0.484041	nodulin MtN21 /EamA-like transporter family protein
AT1G11475.1	217	195	227	245	291	301	4.75094	-0.0696547	0.759467	RNA polymerases N / 8 kDa subunit
AT1G11480.1	469	484	541	757	682	695	5.82922	0.0575847	0.703104	eukaryotic translation initiation factor-related
AT1G11480.2	452	468	510	733	655	672	5.77864	0.0693912	0.620012	eukaryotic translation initiation factor-related
AT1G11482.1	0	1	0	4	0	2	-2.0629	1.83332	0.441949	pseudogene
AT1G11490.1	5	1	2	6	1	3	-1.12049	-0.133648	1	zinc finger (C2H2 type) family protein
AT1G11500.1	3	4	1	5	0	7	-0.981284	0.124214	1	Protein of unknown function (DUF1218)
AT1G11510.1	0	0	0	0	0	0	-2.68614	0	1	DNA-binding storekeeper protein-related transcriptional regulator
AT1G11520.1	2	3	3	5	6	7	-1.02583	0.691245	0.595467	pliceosome associated protein-related
AT1G11530.1	113	92	126	74	116	83	3.29752	-0.738077	2.42e-06	C-terminal cysteine residue is changed to a serine 1
AT1G11540.1	16	19	11	24	23	23	0.738617	0.143834	0.939051	Sulfite exporter TauE/SafE family protein
AT1G11545.1	195	194	185	424	319	379	4.52117	0.508025	0.00169856	xyloglucan endotransglucosylase/hydrolase 8
AT1G11560.1	1	0	1	0	1	0	-2.30759	-1.15109	1	Oligosaccharyltransferase complex/magnesium transporter family protein
AT1G11570.1	6	4	6	6	5	5	-0.429089	-0.448251	0.644839	NTF2-like
AT1G11570.2	6	4	8	6	8	7	-0.12586	-0.231029	0.961011	NTF2-like
AT1G11572.1	2	1	2	1	0	0	-2.28538	-2.34877	0.299944	Plant thionin family protein
AT1G11580.1	979	1093	1064	1737	1557	2111	6.68113	0.333322	0.0581582	methylesterase PCR A
AT1G11590.1	4	1	7	1	1	2	-1.14992	-1.92903	0.0855791	Plant invertase/pectin methylesterase inhibitor superfamily
AT1G11600.1	121	152	137	213	272	236	4.60942	0.353671	0.0142667	cytochrome P450, family 77, subfamily B, polypeptide 1
AT1G11608.1	0	0	0	0	0	0	-2.71529	0	1	F-box associated ubiquitination effector family protein
AT1G11610.1	13	25	8	22	8	10	0.184335	-0.663307	0.394314	cytochrome P450, family 71, subfamily A, polypeptide 18
AT1G11610.2	13	25	8	22	8	10	0.184335	-0.663307	0.394314	cytochrome P450, family 71, subfamily A, polypeptide 18
AT1G11620.1	0	0	0	1	0	0	-2.65756	1.72453	1	F-box and associated interaction domains-containing protein
AT1G11630.1	68	66	89	92	115	92	3.20298	-0.0352887	1	Tetratricopeptide repeat (TPR)-like superfamily protein
AT1G11650.1	1530	1655	1904	2314	2542	2386	7.6624	0.0526184	0.518315	RNA-binding (RRM/RBD/RNP motifs) family protein
AT1G11650.2	1655	1804	2062	2491	2762	2581	7.77596	0.04838	0.563227	RNA-binding (RRM/RBD/RNP motifs) family protein
AT1G11655.1	2	3	3	3	5	12	-1.27348	0.843963	0.508896	unknown protein
AT1G11660.1	406	414	482	679	589	650	5.59099	0.1042	0.40733	heat shock protein 70 (Hsp 70) family protein
AT1G11670.1	255	219	221	483	355	381	4.78097	0.347163	0.0406748	MATE efflux family protein
AT1G11680.1	723	801	794	1297	1257	1297	6.47879	0.274231	0.00109136	CYTOCHROME P450 51G1
AT1G11684.1	0	0	0	0	0	0	-2.65761	0	1	unknown protein
AT1G11690.1	0	2	1	0	0	0	-2.18031	-3.38915	0.487941	unknown protein
AT1G11700.1	230	216	217	234	285	257	4.69031	-0.2361	0.0842433	Protein of unknown function, DUF584
AT1G11710.1	40	38	50	48	50	53	2.41742	-0.218539	0.486057	Pentatricopeptide repeat (PPR) superfamily protein
AT1G11720.1	718	777	916	898	1091	922	6.36841	-0.18602	0.0234231	starch synthase 3
AT1G11720.2	731	791	929	914	1108	942	6.39235	-0.183744	0.0219734	starch synthase 3
AT1G11730.1	31	13	31	29	27	33	1.42875	-0.209161	0.734959	Galactosyltransferase family protein
AT1G11735.1	1	0	1	0	3	0	-2.04457	0.10726	1	MIR171B; miRNA
AT1G11740.1	12	15	15	22	11	13	0.532287	-0.321691	0.664771	ankyrin repeat family protein
AT1G11750.1	690	731	885	1107	1340	1101	6.50523	0.163281	0.0420101	CLP protease proteolytic subunit 6
AT1G11750.2	658	697	853	1049	1257	1042	6.43109	0.142695	0.0891207	CLP protease proteolytic subunit 6
AT1G11755.1	74	74	88	129	134	121	3.33891	0.243566	0.143156	Undecaprenyl pyrophosphate synthetase family protein
AT1G11760.1	51	59	62	71	65	66	2.68644	-0.22475	0.46937	unknown protein
AT1G11770.1	0	0	0	0	0	1	-2.57509	1.72591	1	FAD-binding Berberine family protein
AT1G11780.1	97	103	134	179	182	174	3.84249	0.222926	0.14921	oxidoreductase, 2OG-Fe(II) oxygenase family protein
AT1G11785.1	1	5	2	2	2	1	-1.80591	-1.0728	0.514655	unknown protein
AT1G11790.1	235	327	311	375	422	403	5.0889	0.0021774	1	arogenate dehydratase 1
AT1G11790.2	219	301	294	353	395	374	4.98653	0.00614461	1	arogenate dehydratase 1
AT1G11800.1	65	67	58	101	111	81	3.12969	0.160711	0.589514	endonuclease/exonuclease/phosphatase family protein
AT1G11810.1	0	0	0	0	0	0	-2.60218	0	1	F-box associated ubiquitination effector family protein
AT1G11820.1	312	336	392	531	608	491	5.5108	0.189236	0.063432	O-Glycosyl hydrolases family 17 protein
AT1G11820.2	421	427	486	668	776	627	5.87163	0.173754	0.0735577	O-Glycosyl hydrolases family 17 protein
AT1G11840.1	3418	3794	4113	5187	4999	4735	8.74563	-0.058866	0.473543	glyoxalase I homolog
AT1G11840.2	3478	3886	4202	5331	5113	4846	8.77166	-0.0538393	0.529421	glyoxalase I homolog
AT1G11840.3	3374	3762	4067	5109	4921	4669	8.72915	-0.064786	0.412128	glyoxalase I homolog
AT1G11840.4	3392	3774	4087	5141	4951	4691	8.7352	-0.0630218	0.432274	glyoxalase I homolog
AT1G11840.5	3098	3516	3762	4830	4643	4400	8.61992	-0.0374205	0.723545	glyoxalase I homolog
AT1G11840.6	3395	3778	4088	5141	4956	4698	8.73677	-0.0628953	0.432849	glyoxalase I homolog
AT1G11850.1	176	208	246	290	443	316	4.62859	0.275598	0.0926276	unknown protein
AT1G11850.2	178	213	251	297	449	321	4.65209	0.273197	0.0913805	unknown protein
AT1G11850.3	172	206	240	282	430	311	4.58124	0.267287	0.102808	unknown protein
AT1G11850.4	177	208	247	289	444	318	4.62926	0.273813	0.0959356	unknown protein
AT1G11860.1	11737	12680	14608	16611	21283	16864	10.4981	0.0282804	0.869766	Glycine cleavage T-protein family
AT1G11860.2	11343	12245	14111	16005	20531	16243	10.452	0.0249874	0.903626	Glycine cleavage T-protein family
AT1G11860.3	10537	11414	13169	14947	19188	15223	10.3415	0.0307912	0.856213	Glycine cleavage T-protein family
AT1G11870.1	197	230	265	387	456	374	4.93168	0.356118	0.000156909	Seryl-tRNA synthetase
AT1G11870.2	206	238	279	408	468	387	4.97933	0.346646	0.000157154	Seryl-tRNA synthetase
AT1G11870.3	191	227	255	381	450	362	4.87845	0.367219	0.000102804	Seryl-tRNA synthetase
AT1G11880.1	49	61	58	51	57	60	2.5008	-0.45714	0.0349034	transferases, transferring hexosyl groups
AT1G11890.1	291	311	374	435	423	432	5.12841	-0.0538856	0.745162	Synaptobrevin family protein
AT1G11900.1	38	17	44	38	36	34	1.67101	-0.33016	0.385586	Tetratricopeptide repeat (TPR)-like superfamily protein
AT1G11905.1	90	100	104	147	112	112	3.40266	-0.121588	0.675283	B-cell receptor-associated protein 31-like
AT1G11905.2	47	56	50	77	56	47	2.45694	-0.225615	0.53569	B-cell receptor-associated protein 31-like
AT1G11910.1	4351	4735	4948	6972	6124	5937	8.86246	-0.01841	0.957896	aspartic proteinase A1
AT1G11915.1	8	10	10	6	13	10	0.254266	-0.403244	0.619532	unknown protein
AT1G11920.1	0	1	1	0	0	0	-2.35276	-2.87233	0.750664	Pectin lyase-like superfamily protein
AT1G11925.1	0	0	0	0	0	1	-2.68613	1.72634	1	Stigma-specific Stig1 family protein
AT1G11930.1	403	418	510	481	568	523	5.55146	-0.216799	0.0204654	Predicted pyridoxal phosphate-dependent enzyme, YBL036C type
AT1G11930.2	454	491	556	548	635	590	5.73651	-0.217323	0.0120133	Predicted pyridoxal phosphate-dependent enzyme, YBL036C type
AT1G11940.1	54	65	60	82	62	63	2.69101	-0.248115	0.328748	Core-2/I-branching beta-1,6-N-acetylglucosaminyltransferase family protein
AT1G11950.1	67	66	73	71	72	75	2.90046	-0.376067	0.0598195	Transcription factor jumonji (jmjC) domain-containing protein
AT1G11960.1	102	111	97	161	152	152	3.48601	0.124794	0.592694	ERD (early-responsive to dehydration stress) family protein
AT1G11990.1	4	4	1	3	2	4	-1.65676	-0.446353	0.901218	O-fucosyltransferase family protein
AT1G12000.1	1128	1254	1206	2386	2069	2312	7.24038	0.458168	5.71e-07	Phosphofructokinase family protein
AT1G12010.1	138	125	138	142	99	121	3.00729	-0.604665	0.00778441	2-oxoglutarate (2OG) and Fe(II)-dependent oxygenase superfamily protein
AT1G12020.1	52	58	72	93	101	87	3.24226	0.16843	0.479591	unknown protein
AT1G12030.1	9	5	6	8	12	17	0.536454	0.422602	0.64015	Protein of unknown function (DUF506)
AT1G12040.1	30	46	32	134	86	139	2.32648	1.28064	8.46e-05	leucine-rich repeat/extensin 1
AT1G12050.1	398	402	478	589	586	517	5.62829	-0.0533822	0.695405	fumarylacetoacetase, putative
AT1G12060.1	21	28	38	35	38	47	1.69579	0.0107834	1	BCL-2-associated athanogene 5
AT1G12064.1	0	0	0	2	0	3	-2.02609	3.65076	0.184706	unknown protein
AT1G12070.1	0	1	4	0	6	8	-1.29642	0.993646	0.507989	Immunoglobulin E-set superfamily protein
AT1G12080.1	177	154	174	426	235	353	4.78024	0.552479	0.00336651	Vacuolar calcium-binding protein-related
AT1G12080.2	297	252	295	653	355	578	5.43737	0.458964	0.0154291	Vacuolar calcium-binding protein-related
AT1G12090.1	2703	3456	3849	4354	5283	3867	9.06505	-0.0250393	0.963821	extensin-like protein
AT1G12100.1	4	5	1	2	4	2	-0.879296	-0.756206	0.633924	Bifunctional inhibitor/lipid-transfer protein/seed storage 2S albumin superfamily protein
AT1G12110.1	1591	1916	1670	3239	1909	2666	7.34259	0.141139	0.693119	nitrate transporter 1.1
AT1G12120.1	405	455	463	534	542	534	5.59048	-0.174947	0.0421405	Plant protein of unknown function (DUF863)
AT1G12130.1	8	9	3	10	2	7	-0.910529	-0.525269	0.63039	Flavin-binding monooxygenase family protein
AT1G12140.1	397	352	431	606	595	563	5.46744	0.120968	0.285782	flavin-monooxygenase glucosinolate S-oxygenase 5
AT1G12140.2	382	334	411	580	562	540	5.39581	0.118594	0.339869	flavin-monooxygenase glucosinolate S-oxygenase 5
AT1G12150.1	13	13	6	25	25	38	0.800601	0.991628	0.0277925	Plant protein of unknown function (DUF827)
AT1G12160.1	42	49	43	88	42	111	2.35606	0.402142	0.295699	Flavin-binding monooxygenase family protein
AT1G12200.1	211	304	234	454	395	401	4.75358	0.279989	0.143845	Flavin-binding monooxygenase family protein
AT1G12210.1	31	29	39	51	44	46	1.83521	0.0534419	1	RPS5-like 1
AT1G12211.1	0	0	0	0	0	0	-2.71528	0	1	unknown protein
AT1G12220.1	86	84	106	93	114	122	3.05715	-0.202735	0.374282	Disease resistance protein (CC-NBS-LRR class) family
AT1G12220.2	87	85	105	96	117	122	3.07545	-0.182577	0.415908	Disease resistance protein (CC-NBS-LRR class) family
AT1G12230.1	687	760	842	1113	1223	1052	6.43875	0.107102	0.265159	Aldolase superfamily protein
AT1G12230.2	661	732	818	1079	1194	1014	6.39187	0.113481	0.243008	Aldolase superfamily protein
AT1G12240.1	1401	1354	1554	1927	1950	1682	7.09399	-0.0936758	0.322549	Glycosyl hydrolases family 32 protein
AT1G12244.1	74	86	117	111	154	110	3.32987	-0.01945	1	Polynucleotidyl transferase, ribonuclease H-like superfamily protein
AT1G12250.1	456	477	560	384	550	412	5.51367	-0.61065	1.32e-09	Pentapeptide repeat-containing protein
AT1G12250.2	432	457	534	366	525	398	5.44992	-0.603364	1.51e-09	Pentapeptide repeat-containing protein
AT1G12260.1	47	39	63	57	45	54	2.12739	-0.388502	0.126903	NAC 007
AT1G12270.1	432	524	513	773	791	714	5.9826	0.174169	0.064675	stress-inducible protein, putative
AT1G12280.1	118	120	160	160	145	142	3.44275	-0.288444	0.0536678	LRR and NB-ARC domains-containing disease resistance protein
AT1G12290.1	50	39	48	52	45	50	2.17818	-0.356254	0.161807	Disease resistance protein (CC-NBS-LRR class) family
AT1G12290.2	52	39	49	54	47	54	2.25137	-0.311168	0.245315	Disease resistance protein (CC-NBS-LRR class) family
AT1G12294.1	1	0	1	1	1	1	-2.37566	0.109998	1	MIR472a; miRNA
AT1G12300.1	70	65	74	72	89	82	2.90459	-0.24143	0.268364	Tetratricopeptide repeat (TPR)-like superfamily protein
AT1G12310.1	547	569	587	839	744	775	6.11654	0.0112204	1	Calcium-binding EF-hand family protein
AT1G12320.1	102	87	109	65	93	85	3.45928	-0.752973	2.93e-06	Protein of unknown function (DUF1442)
AT1G12330.1	166	198	203	192	270	207	4.57087	-0.221022	0.0749146	unknown protein
AT1G12340.1	45	39	45	64	58	50	2.3504	-0.0439576	1	Cornichon family protein
AT1G12350.1	132	153	179	225	198	200	4.0961	-0.0311088	0.997117	4-phospho-panto-thenoylcysteine synthetase
AT1G12360.1	579	540	585	755	675	667	5.78951	-0.161443	0.161358	Sec1/munc18-like (SM) proteins superfamily
AT1G12370.1	113	139	119	166	153	173	3.74368	-0.0507824	0.919166	photolyase 1
AT1G12370.2	122	161	128	181	163	182	3.86371	-0.102404	0.688848	photolyase 1
AT1G12380.1	127	153	162	200	228	201	3.94704	0.0507553	0.858155	unknown protein
AT1G12390.1	114	101	123	151	157	130	3.64474	-0.0853711	0.720209	Cornichon family protein
AT1G12400.1	43	42	53	68	69	64	2.43693	0.0842334	0.89921	Nucleotide excision repair, TFIIH, subunit TTDA
AT1G12410.1	1098	1160	1443	1570	1890	1533	7.1253	-0.0255208	0.902363	CLP protease proteolytic subunit 2
AT1G12420.1	105	120	117	143	124	153	3.46409	-0.159834	0.447452	ACT domain repeat 8
AT1G12430.1	271	278	321	358	414	397	4.91323	-0.0316845	0.930513	armadillo repeat kinesin 3
AT1G12430.2	270	272	314	354	407	391	4.8761	-0.0296702	0.940834	armadillo repeat kinesin 3
AT1G12440.1	448	467	486	491	611	473	5.56626	-0.293952	0.00104074	A20/AN1-like zinc finger family protein
AT1G12440.2	425	442	450	458	558	443	5.47731	-0.315009	0.000406828	A20/AN1-like zinc finger family protein
AT1G12450.1	60	59	66	75	68	54	2.50336	-0.368234	0.0978773	SNARE associated Golgi protein family
AT1G12460.1	172	177	224	206	255	215	4.31708	-0.219269	0.101311	Leucine-rich repeat protein kinase family protein
AT1G12470.1	455	521	504	676	644	662	5.65051	-0.0367532	0.868818	zinc ion binding
AT1G12480.1	41	44	27	49	55	48	2.14616	-0.0272539	1	C4-dicarboxylate transporter/malic acid transport protein
AT1G12490.1	0	1	3	0	0	0	-2.37569	-3.76556	0.298244	F-box associated ubiquitination effector family protein
AT1G12500.1	342	396	455	574	648	517	5.55125	0.0855245	0.494083	Nucleotide-sugar transporter family protein
AT1G12520.1	168	188	191	174	188	169	4.2052	-0.501358	3.6e-06	copper chaperone for SOD1
AT1G12520.2	174	193	198	181	194	176	4.24343	-0.49471	3.85e-06	copper chaperone for SOD1
AT1G12520.3	159	177	173	166	175	155	4.1008	-0.496351	1.53e-05	copper chaperone for SOD1
AT1G12530.1	125	129	135	146	137	156	3.79914	-0.283017	0.0735768	unknown protein
AT1G12540.1	0	0	0	0	0	0	-2.71531	0	1	basic helix-loop-helix (bHLH) DNA-binding superfamily protein
AT1G12550.1	46	43	62	59	64	60	2.45174	-0.178995	0.578206	D-isomer specific 2-hydroxyacid dehydrogenase family protein
AT1G12560.1	62	66	41	182	116	190	2.89243	1.06738	0.000233456	expansin A7
AT1G12570.1	75	73	84	84	105	80	3.24785	-0.247424	0.312588	Glucose-methanol-choline (GMC) oxidoreductase family protein
AT1G12580.1	279	335	347	449	456	425	5.13169	0.0110387	1	phosphoenolpyruvate carboxylase-related kinase 1
AT1G12600.1	4	10	6	5	4	8	-0.56129	-0.676742	0.42511	UDP-N-acetylglucosamine (UAA) transporter family
AT1G12610.1	0	0	0	0	0	0	-2.68613	0	1	Integrase-type DNA-binding superfamily protein
AT1G12620.1	58	68	79	77	86	87	2.94203	-0.170381	0.518803	Pentatricopeptide repeat (PPR) superfamily protein
AT1G12630.1	1	0	3	3	4	1	-1.14076	0.50828	0.972892	Integrase-type DNA-binding superfamily protein
AT1G12640.1	326	351	374	504	377	452	4.9936	-0.111251	0.4919	MBOAT (membrane bound O-acyl transferase) family protein
AT1G12650.1	188	196	209	284	251	313	4.58949	0.0609101	0.820337	unknown protein
AT1G12650.2	194	205	217	297	263	326	4.63533	0.0692992	0.762642	unknown protein
AT1G12650.3	190	195	210	285	250	314	4.59168	0.0577924	0.833499	unknown protein
AT1G12650.4	174	176	187	253	220	286	4.40655	0.044034	0.919269	unknown protein
AT1G12665.1	0	0	0	0	0	0	-2.71529	0	1	unknown protein
AT1G12670.1	0	1	0	0	0	0	-2.57513	-2.05893	1	pseudogene
AT1G12672.1	1	2	0	1	1	0	-2.37552	-0.907854	0.90929	unknown protein
AT1G12672.2	1	2	0	1	1	0	-2.24223	-0.90782	0.909233	unknown protein
AT1G12680.1	184	184	219	236	217	216	4.41141	-0.268712	0.0234366	phosphoenolpyruvate carboxylase-related kinase 2
AT1G12700.1	34	41	39	55	59	47	2.40812	0.0380952	1	ATP binding;nucleic acid binding;helicases
AT1G12710.1	39	52	53	51	43	40	2.28501	-0.559676	0.021961	phloem protein 2-A12
AT1G12730.1	49	52	43	41	58	61	2.65538	-0.309625	0.338559	GPI transamidase subunit PIG-U
AT1G12730.2	46	49	43	39	56	58	2.57705	-0.311436	0.333564	GPI transamidase subunit PIG-U
AT1G12740.1	58	67	79	188	86	125	2.95439	0.523804	0.182981	cytochrome P450, family 87, subfamily A, polypeptide 2
AT1G12740.2	55	65	79	177	83	122	2.90076	0.498414	0.195103	cytochrome P450, family 87, subfamily A, polypeptide 2
AT1G12750.1	130	143	195	167	209	201	4.40968	-0.151571	0.431749	RHOMBOID-like protein 6
AT1G12750.2	149	158	207	179	217	213	4.517	-0.210413	0.167293	RHOMBOID-like protein 6
AT1G12750.3	154	163	214	179	222	221	4.55139	-0.226701	0.121016	RHOMBOID-like protein 6
AT1G12760.1	427	429	471	564	525	476	5.50402	-0.221329	0.0110374	Zinc finger, C3HC4 type (RING finger) family protein
AT1G12760.2	404	413	434	532	494	455	5.43429	-0.216186	0.0166041	Zinc finger, C3HC4 type (RING finger) family protein
AT1G12770.1	378	434	485	658	922	660	5.77087	0.326541	0.00106148	P-loop containing nucleoside triphosphate hydrolases superfamily protein
AT1G12775.1	45	39	44	49	59	55	2.31111	-0.111019	0.805472	Pentatricopeptide repeat (PPR) superfamily protein
AT1G12780.1	353	377	400	300	379	346	5.03444	-0.600335	2.05e-09	UDP-D-glucose/UDP-D-galactose 4-epimerase 1
AT1G12790.1	27	30	26	19	39	35	1.60722	-0.295395	0.470609	unknown protein
AT1G12800.1	2483	2707	3147	3325	4382	3537	8.26085	-0.0277589	0.875691	Nucleic acid-binding, OB-fold-like protein
AT1G12805.1	7	5	1	9	13	43	-0.63518	1.8335	0.0652728	nucleotide binding
AT1G12810.1	131	144	148	172	167	145	3.97924	-0.264673	0.0701722	proline-rich family protein
AT1G12810.2	110	128	125	153	142	126	3.7469	-0.245029	0.147987	proline-rich family protein
AT1G12820.1	506	502	573	598	665	584	5.72309	-0.235224	0.0030148	auxin signaling F-box 3
AT1G12830.1	118	162	165	197	234	191	4.16332	0.0251484	1	unknown protein
AT1G12840.1	1385	1399	1597	2254	2092	2010	7.34588	0.0792974	0.360465	vacuolar ATP synthase subunit C (VATC) / V-ATPase C subunit / vacuolar proton pump C subunit (DET3)
AT1G12845.1	36	57	60	90	97	77	3.48427	0.330696	0.226992	unknown protein
AT1G12850.1	317	306	378	525	449	433	5.31399	0.034318	0.894321	Phosphoglycerate mutase family protein
AT1G12855.1	1	4	3	3	3	2	-1.67154	-0.437404	0.994906	F-box family protein
AT1G12860.1	292	332	372	380	519	404	5.33478	-0.072094	0.650899	basic helix-loop-helix (bHLH) DNA-binding superfamily protein
AT1G12870.1	0	1	0	0	1	0	-2.68602	-0.337377	1	F-box and associated interaction domains-containing protein
AT1G12880.1	72	72	103	93	116	94	3.14238	-0.162203	0.511074	nudix hydrolase homolog 12
AT1G12890.1	1	1	0	2	0	1	-1.8066	0.109288	1	Integrase-type DNA-binding superfamily protein
AT1G12900.1	13795	14520	17198	18795	23300	17021	10.5853	-0.0846953	0.379362	glyceraldehyde 3-phosphate dehydrogenase A subunit 2
AT1G12900.2	12923	13639	16181	17618	21955	16043	10.4982	-0.081994	0.403254	glyceraldehyde 3-phosphate dehydrogenase A subunit 2
AT1G12900.3	13242	13891	16520	17931	22258	16248	10.5274	-0.0913781	0.333861	glyceraldehyde 3-phosphate dehydrogenase A subunit 2
AT1G12900.4	12275	12949	15429	16788	20836	15224	10.4152	-0.0831218	0.401092	glyceraldehyde 3-phosphate dehydrogenase A subunit 2
AT1G12910.1	192	170	200	276	272	243	4.38786	0.0333855	0.962508	Transducin/WD40 repeat-like superfamily protein
AT1G12920.1	688	729	842	1298	1350	1292	6.58265	0.345664	1.66e-08	eukaryotic release factor 1-2
AT1G12930.1	237	253	283	368	354	324	4.72567	-0.0218256	0.993768	ARM repeat superfamily protein
AT1G12940.1	0	1	1	0	0	3	-2.18039	0.114906	1	nitrate transporter2.5
AT1G12950.1	31	34	29	81	47	63	1.79221	0.564707	0.170484	root hair specific 2
AT1G12960.1	1	0	0	0	0	0	-2.71517	-2.06296	1	Ribosomal protein L18e/L15 superfamily protein
AT1G12970.1	79	64	58	81	80	73	2.73447	-0.243339	0.283281	plant intracellular ras group-related LRR 3
AT1G12980.1	0	0	0	1	1	1	-1.88711	2.98404	0.482129	Integrase-type DNA-binding superfamily protein
AT1G12990.1	141	145	192	224	242	201	4.3502	0.023025	0.998713	beta-1,4-N-acetylglucosaminyltransferase family protein
AT1G13000.1	128	127	165	190	192	181	3.9704	-0.0340363	0.981425	Protein of unknown function (DUF707)
AT1G13000.2	134	132	171	204	193	183	3.99728	-0.0485724	0.901998	Protein of unknown function (DUF707)
AT1G13020.1	381	396	437	623	663	560	5.4968	0.144879	0.121016	eukaryotic initiation factor 4B2
AT1G13030.1	101	114	110	196	170	178	4.03287	0.284956	0.0684735	sphere organelles protein-related
AT1G13040.1	28	26	37	39	46	35	2.02056	-0.0591304	1	Pentatricopeptide repeat (PPR-like) superfamily protein
AT1G13050.1	22	26	34	48	55	41	2.10092	0.353004	0.267965	unknown protein
AT1G13050.2	22	24	32	49	52	39	2.08588	0.384285	0.217025	unknown protein
AT1G13060.1	857	916	1005	1429	1263	1340	6.72358	0.0819655	0.393726	20S proteasome beta subunit E1
AT1G13060.2	789	844	932	1324	1168	1241	6.62059	0.0861015	0.379343	20S proteasome beta subunit E1
AT1G13070.1	0	1	0	1	0	0	-2.57507	-0.334607	1	CYP71B27 (cytochrome P450	family 71	subfamily B	polypeptide 27")"
AT1G13080.1	339	385	400	529	477	432	5.09207	-0.102855	0.460178	cytochrome P450, family 71, subfamily B, polypeptide 2
AT1G13080.2	318	353	383	495	445	406	4.98585	-0.104795	0.473213	cytochrome P450, family 71, subfamily B, polypeptide 2
AT1G13090.1	468	532	588	527	606	521	5.68315	-0.399303	1.32e-06	cytochrome P450, family 71, subfamily B, polypeptide 28
AT1G13100.1	77	78	75	79	84	76	2.97676	-0.404899	0.044694	cytochrome P450, family 71, subfamily B, polypeptide 29
AT1G13110.1	577	515	611	738	695	591	6.11461	-0.212748	0.0441564	cytochrome P450, family 71 subfamily B, polypeptide 7
AT1G13120.1	203	229	250	295	299	304	4.74126	-0.0597608	0.7748	embryo defective 1745
AT1G13130.1	38	33	51	53	61	46	1.93823	-0.0658408	1	Cellulase (glycosyl hydrolase family 5) protein
AT1G13140.1	11	7	9	15	4	7	0.132937	-0.505758	0.531209	cytochrome P450, family 86, subfamily C, polypeptide 3
AT1G13140.2	9	7	8	15	4	5	0.0485656	-0.451748	0.64295	cytochrome P450, family 86, subfamily C, polypeptide 3
AT1G13145.1	16	22	22	28	23	34	1.48442	0.0475766	1	pseudogene
AT1G13150.1	9	13	16	11	16	9	0.575867	-0.530783	0.331666	cytochrome P450, family 86, subfamily C, polypeptide 4
AT1G13160.1	352	329	363	714	688	739	5.65454	0.577856	1.08e-10	ARM repeat superfamily protein
AT1G13170.1	259	271	294	426	399	455	4.97885	0.179336	0.120735	OSBP(oxysterol binding protein)-related protein 1D
AT1G13170.2	253	266	291	418	389	442	4.9449	0.168762	0.145386	OSBP(oxysterol binding protein)-related protein 1D
AT1G13180.1	103	83	96	136	128	131	3.38209	0.0268065	1	Actin-like ATPase superfamily protein
AT1G13190.1	269	309	332	341	426	405	4.93258	-0.092635	0.498045	RNA-binding (RRM/RBD/RNP motifs) family protein
AT1G13195.1	70	84	85	101	97	90	2.96118	-0.188774	0.405589	RING/U-box superfamily protein
AT1G13195.2	63	78	76	92	88	82	2.84917	-0.185977	0.477581	RING/U-box superfamily protein
AT1G13200.1	0	0	0	1	0	0	-2.44737	1.72435	1	F-box and associated interaction domains-containing protein
AT1G13210.1	234	264	244	359	257	321	4.53506	-0.119222	0.663286	autoinhibited Ca2+/ATPase II
AT1G13220.1	73	70	123	108	124	123	3.23554	-0.034839	1	nuclear matrix constituent protein-related
AT1G13220.2	270	270	338	325	399	382	5.06457	-0.12406	0.302538	nuclear matrix constituent protein-related
AT1G13230.1	3	1	6	4	7	2	-0.870879	-0.0774473	1	Leucine-rich repeat (LRR) family protein
AT1G13245.1	308	281	350	221	327	212	5.00797	-0.770225	2.98e-09	ROTUNDIFOLIA like 17
AT1G13250.1	128	149	150	178	217	202	4.36279	0.0247455	1	galacturonosyltransferase-like 3
AT1G13260.1	83	65	102	137	186	127	3.38921	0.386055	0.0583543	related to ABI3/VP1 1
AT1G13270.1	139	172	215	305	503	375	4.74263	0.711604	3.27e-07	methionine aminopeptidase 1B
AT1G13270.2	126	153	198	279	448	335	4.58691	0.697365	4.55e-07	methionine aminopeptidase 1B
AT1G13280.1	294	246	285	380	298	350	4.99904	-0.141133	0.393339	allene oxide cyclase 4
AT1G13290.1	0	0	2	0	1	0	-2.18046	-1.14727	1	C2H2-like zinc finger protein
AT1G13300.1	134	126	104	218	146	185	3.69199	0.129353	0.736816	myb-like transcription factor family protein
AT1G13310.1	10	14	6	12	2	6	-0.0533908	-1.03165	0.211501	Endosomal targeting BRO1-like domain-containing protein
AT1G13320.1	543	567	645	877	861	817	5.99437	0.0843359	0.385611	protein phosphatase 2A subunit A3
AT1G13320.2	512	531	613	831	811	785	5.90974	0.094425	0.327774	protein phosphatase 2A subunit A3
AT1G13320.3	531	561	638	853	836	803	5.9686	0.0693752	0.507374	protein phosphatase 2A subunit A3
AT1G13330.1	22	22	27	30	30	33	1.72323	-0.0682427	1	Arabidopsis Hop2 homolog
AT1G13340.1	59	62	62	88	61	67	2.39769	-0.218234	0.549466	Regulator of Vps4 activity in the MVB pathway protein
AT1G13350.1	336	379	406	398	415	400	5.3072	-0.343831	4.24e-05	Protein kinase superfamily protein
AT1G13350.2	340	381	409	400	416	408	5.31544	-0.342214	5.13e-05	Protein kinase superfamily protein
AT1G13360.1	494	490	567	751	770	659	6.03168	0.031577	0.876324	unknown protein
AT1G13360.2	345	339	391	576	559	481	5.5327	0.128668	0.221465	unknown protein
AT1G13360.3	345	339	391	576	559	481	5.53198	0.128672	0.220512	unknown protein
AT1G13370.1	4	4	3	7	7	3	-1.072	0.162916	1	Histone superfamily protein
AT1G13380.1	145	198	216	270	280	268	4.48651	0.0952266	0.625888	Protein of unknown function (DUF1218)
AT1G13390.1	65	67	81	113	103	91	3.25917	0.0691773	0.876318	unknown protein
AT1G13390.2	99	88	120	146	129	120	3.66996	-0.0933411	0.77194	unknown protein
AT1G13400.1	1	1	0	1	3	5	-1.13081	1.56776	0.454275	C2H2 and C2HC zinc fingers superfamily protein
AT1G13410.1	14	14	13	36	26	26	1.23011	0.639247	0.0897471	Tetratricopeptide repeat (TPR)-like superfamily protein
AT1G13420.1	63	64	60	99	90	122	2.79919	0.276685	0.661692	sulfotransferase 4B
AT1G13430.1	20	21	21	33	24	31	1.22584	0.0476309	1	sulfotransferase 4C
AT1G13440.1	12394	12775	14643	19905	22584	20001	10.73	0.191237	0.00387394	glyceraldehyde-3-phosphate dehydrogenase C2
AT1G13440.2	10788	11046	12633	17063	19475	17240	10.532	0.182227	0.00723858	glyceraldehyde-3-phosphate dehydrogenase C2
AT1G13450.1	199	229	204	246	270	237	4.36396	-0.208833	0.131936	Homeodomain-like superfamily protein
AT1G13450.2	186	205	189	223	239	218	4.22787	-0.231037	0.0746255	Homeodomain-like superfamily protein
AT1G13450.3	199	220	196	229	266	226	4.33501	-0.232811	0.0752013	Homeodomain-like superfamily protein
AT1G13460.1	220	205	225	266	245	245	4.43084	-0.241332	0.0514636	Protein phosphatase 2A regulatory B subunit family protein
AT1G13460.2	223	206	232	266	243	250	4.43069	-0.259243	0.0295944	Protein phosphatase 2A regulatory B subunit family protein
AT1G13470.1	3	1	5	0	0	2	-1.75996	-2.38861	0.142531	Protein of unknown function (DUF1262)
AT1G13480.1	17	22	14	10	10	11	0.566132	-1.22585	0.0157755	Protein of unknown function (DUF1262)
AT1G13490.1	1	2	4	2	2	1	-1.82195	-0.884545	0.652483	Protein of unknown function (DUF1262)
AT1G13500.1	9	6	5	7	10	7	-0.357691	-0.197543	0.894774	Protein of unknown function (DUF1262)
AT1G13510.1	36	38	22	61	19	38	1.42769	-0.166146	0.942047	Protein of unknown function (DUF1262)
AT1G13520.1	72	110	66	141	50	82	3.05752	-0.316798	0.650867	Protein of unknown function (DUF1262)
AT1G13530.1	37	47	18	52	13	18	1.26698	-0.769012	0.20063	Protein of unknown function (DUF1262)
AT1G13540.1	16	14	18	9	9	11	0.155664	-1.17277	0.00953715	Protein of unknown function (DUF1262)
AT1G13550.1	7	13	7	7	3	4	-0.404169	-1.37974	0.0575227	Protein of unknown function (DUF1262)
AT1G13560.1	595	626	683	778	898	784	6.22969	-0.0900663	0.310948	aminoalcoholphosphotransferase 1
AT1G13560.2	558	593	639	735	846	740	6.14844	-0.0849351	0.365971	aminoalcoholphosphotransferase 1
AT1G13570.1	123	108	121	173	171	140	3.71838	-0.00216628	1	F-box/RNI-like superfamily protein
AT1G13580.1	97	93	107	162	128	117	3.37524	-0.00412874	1	LAG1 longevity assurance homolog 3
AT1G13580.2	104	105	115	169	141	122	3.47028	-0.0442044	0.964432	LAG1 longevity assurance homolog 3
AT1G13580.3	104	108	116	168	141	122	3.47702	-0.0651436	0.859509	LAG1 longevity assurance homolog 3
AT1G13590.1	22	36	24	74	38	58	1.59424	0.596881	0.0802914	phytosulfokine 1 precursor
AT1G13600.1	27	27	19	35	26	42	1.35948	0.0376931	1	basic leucine-zipper 58
AT1G13605.1	0	0	0	2	0	0	-2.57516	2.48801	0.750664	unknown protein
AT1G13607.1	0	0	0	0	1	0	-2.65759	1.72191	1	Defensin-like (DEFL) family protein
AT1G13608.1	0	0	0	0	0	0	-2.35285	0	1	Defensin-like (DEFL) family protein
AT1G13609.1	2	1	5	3	20	4	1.29571	1.25033	0.22567	Defensin-like (DEFL) family protein
AT1G13609.2	1	2	4	2	11	2	0.773316	0.614855	0.6615	Defensin-like (DEFL) family protein
AT1G13610.1	6	10	6	9	7	17	-0.352321	0.128091	0.991767	alpha/beta-Hydrolases superfamily protein
AT1G13610.2	5	10	6	9	6	17	-0.398835	0.152531	0.991342	alpha/beta-Hydrolases superfamily protein
AT1G13620.1	3	7	7	15	12	14	-0.482217	0.803365	0.201295	unknown protein
AT1G13630.1	24	14	18	25	25	26	1.36988	-0.0194667	1	Tetratricopeptide repeat (TPR)-like superfamily protein
AT1G13630.2	25	16	21	27	25	30	1.52271	-0.0552023	1	Tetratricopeptide repeat (TPR)-like superfamily protein
AT1G13635.1	23	20	23	37	27	29	1.1834	0.036213	1	DNA glycosylase superfamily protein
AT1G13635.2	24	20	25	37	30	30	1.23961	0.0327427	1	DNA glycosylase superfamily protein
AT1G13640.1	257	229	293	407	414	380	4.86846	0.166029	0.126061	Phosphatidylinositol 3- and 4-kinase family protein
AT1G13650.1	481	636	607	470	518	341	5.5741	-0.83822	6.3e-12	unknown protein
AT1G13650.2	499	650	624	476	534	354	5.61088	-0.841377	2.78e-12	unknown protein
AT1G13670.1	75	68	86	99	74	85	3.00118	-0.284168	0.184978	unknown protein
AT1G13680.1	1	0	1	0	2	0	-2.02659	-0.389957	1	PLC-like phosphodiesterases superfamily protein
AT1G13690.1	134	131	169	232	254	229	4.40639	0.262342	0.0431434	ATPase E1
AT1G13700.1	19	22	29	18	30	14	1.07591	-0.632057	0.138353	6-phosphogluconolactonase 1
AT1G13710.1	51	65	59	85	99	104	2.99295	0.260404	0.254355	cytochrome P450, family 78, subfamily A, polypeptide 5
AT1G13730.1	367	388	387	624	580	594	5.74978	0.195986	0.0464745	Nuclear transport factor 2 (NTF2) family protein with RNA binding (RRM-RBD-RNP motifs) domain
AT1G13740.1	76	83	64	96	104	95	3.28307	-0.0575776	0.910077	ABI five binding protein 2
AT1G13750.1	82	93	67	130	93	115	2.88147	0.0198087	1	Purple acid phosphatases superfamily protein
AT1G13770.1	117	118	117	133	163	156	3.77631	-0.0994734	0.678889	Protein of unknown function, DUF647
AT1G13770.2	116	118	112	129	159	151	3.74466	-0.117397	0.589909	Protein of unknown function, DUF647
AT1G13780.1	56	58	56	73	69	69	2.65513	-0.146841	0.596134	F-box/RNI-like/FBD-like domains-containing protein
AT1G13790.1	51	40	54	62	70	74	2.81537	0.0481364	0.987424	XH/XS domain-containing protein
AT1G13800.1	7	9	10	20	20	22	0.854828	0.789829	0.0930256	Tetratricopeptide repeat (TPR)-like superfamily protein
AT1G13810.1	82	65	82	94	98	105	3.26708	-0.083446	0.821269	Restriction endonuclease, type II-like superfamily protein
AT1G13820.1	449	487	565	611	786	603	5.81874	-0.0460697	0.804751	alpha/beta-Hydrolases superfamily protein
AT1G13830.1	34	24	30	66	34	46	1.53776	0.271837	0.652522	Carbohydrate-binding X8 domain superfamily protein
AT1G13860.1	162	155	194	213	260	256	4.40534	0.0548564	0.809006	QUASIMODO2 LIKE 1
AT1G13860.2	155	147	181	202	245	232	4.32198	0.0330644	0.955878	QUASIMODO2 LIKE 1
AT1G13860.3	168	158	196	215	262	262	4.4422	0.0437193	0.88745	QUASIMODO2 LIKE 1
AT1G13860.4	162	157	195	212	261	255	4.40784	0.0443708	0.877869	QUASIMODO2 LIKE 1
AT1G13870.1	110	106	122	171	170	161	3.88088	0.112009	0.574025	calmodulin binding;purine nucleotide binding
AT1G13880.1	193	228	246	225	232	223	4.37222	-0.429415	2.9e-05	ELM2 domain-containing protein
AT1G13890.1	0	0	1	0	0	0	-2.68607	-2.05487	1	soluble N-ethylmaleimide-sensitive factor adaptor protein 30
AT1G13900.1	231	258	263	434	362	391	4.79518	0.201664	0.0751913	Purple acid phosphatases superfamily protein
AT1G13910.1	80	80	101	69	84	83	3.12242	-0.601524	0.000590611	Leucine-rich repeat (LRR) family protein
AT1G13920.1	28	38	49	44	34	56	2.39525	-0.23104	0.537519	Remorin family protein
AT1G13930.1	3017	3174	3661	3211	3511	2862	9.4728	-0.49959	1.08e-10	unknown protein
AT1G13930.2	3001	3163	3643	3193	3485	2849	9.46435	-0.501511	7.93e-11	unknown protein
AT1G13930.3	3002	3163	3644	3194	3486	2849	9.46466	-0.50151	8.48e-11	unknown protein
AT1G13940.1	211	210	251	280	317	254	4.43766	-0.118383	0.350996	Plant protein of unknown function (DUF863)
AT1G13950.1	76	75	67	118	89	134	3.1221	0.188404	0.49109	eukaryotic elongation factor 5A-1
AT1G13960.1	195	213	185	247	215	242	4.26634	-0.212718	0.227086	WRKY DNA-binding protein 4
AT1G13960.2	180	202	168	236	185	227	4.15044	-0.222768	0.236734	WRKY DNA-binding protein 4
AT1G13970.1	54	77	74	112	69	108	2.72665	0.0492782	1	Protein of unknown function (DUF1336)
AT1G13980.1	409	420	461	687	673	620	5.51886	0.159037	0.146865	sec7 domain-containing protein
AT1G13980.2	409	412	456	683	660	617	5.50707	0.159036	0.155303	sec7 domain-containing protein
AT1G13990.1	155	205	244	145	115	102	3.9258	-1.18961	1.78e-17	unknown protein
AT1G13990.2	139	188	222	137	103	93	3.78719	-1.17161	3.04e-15	unknown protein
AT1G13990.3	120	155	196	113	84	79	3.55665	-1.22013	2.26e-14	unknown protein
AT1G14000.1	625	682	775	908	866	860	6.12831	-0.116219	0.241025	VH1-interacting kinase
AT1G14010.1	177	207	217	329	258	281	4.5248	0.0744058	0.688854	emp24/gp25L/p24 family/GOLD family protein
AT1G14020.1	167	182	204	275	304	260	4.45889	0.142656	0.287009	O-fucosyltransferase family protein
AT1G14030.1	286	339	418	378	525	431	5.36589	-0.100583	0.53703	Rubisco methyltransferase family protein
AT1G14040.1	81	110	83	150	115	137	3.37285	0.0952702	0.841445	EXS (ERD1/XPR1/SYG1) family protein
AT1G14060.1	111	123	141	199	179	230	4.16766	0.245834	0.218937	GCK domain-containing protein
AT1G14070.1	55	70	37	99	76	109	2.72205	0.347587	0.243484	fucosyltransferase 7
AT1G14080.1	47	65	53	113	60	108	2.41208	0.319156	0.376959	fucosyltransferase 6
AT1G14090.1	41	58	62	79	55	77	2.71793	-0.0632718	0.977207	pseudogene
AT1G14100.1	1	1	0	1	2	2	-2.00811	0.769885	0.909296	fucosyltransferase 8
AT1G14110.1	0	0	0	0	0	0	-2.71529	0	1	fucosyltransferase 9
AT1G14120.1	249	275	259	379	285	324	4.79971	-0.122154	0.72318	2-oxoglutarate (2OG) and Fe(II)-dependent oxygenase superfamily protein
AT1G14130.1	105	127	108	119	119	89	3.41461	-0.519142	0.00436601	2-oxoglutarate (2OG) and Fe(II)-dependent oxygenase superfamily protein
AT1G14140.1	104	97	113	130	136	155	3.67253	-0.0340465	0.999012	Mitochondrial substrate carrier family protein
AT1G14150.1	715	755	851	832	1056	856	6.47019	-0.219185	0.0122748	PsbQ-like 2
AT1G14150.2	526	562	641	629	806	673	6.04004	-0.17358	0.0888132	PsbQ-like 2
AT1G14160.1	48	48	36	78	35	69	2.18063	0.00627367	1	Uncharacterised protein family (UPF0497)
AT1G14170.1	116	119	99	212	134	168	3.61238	0.161571	0.563227	RNA-binding KH domain-containing protein
AT1G14170.2	112	117	96	202	131	165	3.57184	0.155603	0.577195	RNA-binding KH domain-containing protein
AT1G14170.3	123	124	103	222	140	174	3.66481	0.153843	0.591861	RNA-binding KH domain-containing protein
AT1G14180.1	71	67	72	96	103	97	3.22577	0.0362198	1	RING/U-box superfamily protein
AT1G14180.2	71	66	70	95	101	94	3.17785	0.027054	1	RING/U-box superfamily protein
AT1G14182.1	1	0	0	0	1	0	-2.52267	-0.338584	1	SCRL28 (SCR-like 28)
AT1G14185.1	29	40	25	50	38	27	1.82195	-0.173461	0.788646	Glucose-methanol-choline (GMC) oxidoreductase family protein
AT1G14190.1	38	52	61	66	48	59	2.53304	-0.25653	0.393061	Glucose-methanol-choline (GMC) oxidoreductase family protein
AT1G14200.1	50	64	63	58	58	48	2.54303	-0.567358	0.00941557	RING/U-box superfamily protein
AT1G14205.1	23	13	19	11	16	17	0.894299	-0.775771	0.0512167	Ribosomal L18p/L5e family protein
AT1G14210.1	128	132	146	249	251	287	4.32792	0.498074	2.66e-05	Ribonuclease T2 family protein
AT1G14220.1	15	24	12	27	24	28	0.86635	0.168579	0.870242	Ribonuclease T2 family protein
AT1G14225.1	0	0	0	1	0	0	-2.62948	1.72439	1	unknown protein
AT1G14230.1	222	252	259	326	262	300	4.54011	-0.178614	0.220633	GDA1/CD39 nucleoside phosphatase family protein
AT1G14240.1	130	147	168	258	237	230	3.85972	0.249909	0.335018	GDA1/CD39 nucleoside phosphatase family protein
AT1G14240.2	129	148	169	258	239	232	3.86325	0.254965	0.318811	GDA1/CD39 nucleoside phosphatase family protein
AT1G14240.3	124	138	157	241	230	217	3.77972	0.25989	0.314841	GDA1/CD39 nucleoside phosphatase family protein
AT1G14240.4	129	148	170	259	241	232	3.87128	0.257632	0.303969	GDA1/CD39 nucleoside phosphatase family protein
AT1G14250.1	200	103	103	87	38	80	4.30977	-1.45852	0.000690535	GDA1/CD39 nucleoside phosphatase family protein
AT1G14260.1	3	10	4	20	11	14	0.45985	0.935428	0.112741	RING/FYVE/PHD zinc finger superfamily protein
AT1G14260.2	4	11	6	21	12	17	0.617183	0.786953	0.165721	RING/FYVE/PHD zinc finger superfamily protein
AT1G14270.1	419	452	514	524	741	625	5.77574	-0.0110494	1	CAAX amino terminal protease family protein
AT1G14270.2	395	427	479	490	686	580	5.69535	-0.0270648	0.950803	CAAX amino terminal protease family protein
AT1G14270.3	404	436	489	506	696	589	5.7244	-0.0292654	0.930948	CAAX amino terminal protease family protein
AT1G14270.4	379	409	451	481	654	556	5.63831	-0.0112611	1	CAAX amino terminal protease family protein
AT1G14280.1	440	437	540	409	540	449	5.39174	-0.478329	1.19e-08	phytochrome kinase substrate 2
AT1G14290.1	159	182	195	300	271	252	4.32343	0.16121	0.298813	sphingoid base hydroxylase 2
AT1G14300.1	104	115	125	181	192	186	3.98426	0.242304	0.104909	ARM repeat superfamily protein
AT1G14300.2	102	114	118	174	186	169	3.91479	0.204538	0.201459	ARM repeat superfamily protein
AT1G14310.1	74	87	95	117	136	129	3.3818	0.119449	0.612669	Haloacid dehalogenase-like hydrolase (HAD) superfamily protein
AT1G14315.1	0	0	0	0	0	0	-2.68614	0	1	F-box and associated interaction domains-containing protein
AT1G14315.2	0	0	0	0	0	0	-2.68614	0	1	F-box and associated interaction domains-containing protein
AT1G14320.1	4367	4653	4998	8103	8771	8055	9.26936	0.371049	3.98e-15	Ribosomal protein L16p/L10e family protein
AT1G14320.2	3025	3177	3346	5634	6143	5664	8.75562	0.408648	6.19e-16	Ribosomal protein L16p/L10e family protein
AT1G14330.1	111	125	122	171	141	167	3.5369	-0.0370154	0.982087	Galactose oxidase/kelch repeat superfamily protein
AT1G14340.1	139	132	129	151	159	146	3.6917	-0.272478	0.0882187	RNA-binding (RRM/RBD/RNP motifs) family protein
AT1G14345.1	769	788	1017	959	1291	948	6.55692	-0.146264	0.212299	NAD(P)-linked oxidoreductase superfamily protein
AT1G14350.1	227	235	269	235	304	255	4.56288	-0.339955	0.0015056	Duplicated homeodomain-like superfamily protein
AT1G14350.2	230	235	270	234	304	253	4.56187	-0.353603	0.00140876	Duplicated homeodomain-like superfamily protein
AT1G14360.1	172	167	208	267	273	253	4.54527	0.0778808	0.674353	UDP-galactose transporter 3
AT1G14370.1	63	68	76	69	72	97	2.62583	-0.252582	0.34152	protein kinase 2A
AT1G14380.1	320	327	315	391	469	395	5.15412	-0.079917	0.599464	IQ-domain 28
AT1G14380.2	285	280	279	343	427	345	4.97921	-0.0618895	0.726628	IQ-domain 28
AT1G14380.3	310	325	310	377	449	383	5.11924	-0.10746	0.426334	IQ-domain 28
AT1G14390.1	28	32	22	58	32	53	1.70595	0.343977	0.43616	Leucine-rich repeat protein kinase family protein
AT1G14400.1	1039	1066	1107	1353	1144	1199	6.75439	-0.256014	0.00744351	ubiquitin carrier protein 1
AT1G14400.2	810	830	842	1021	881	947	6.40726	-0.259899	0.00659016	ubiquitin carrier protein 1
AT1G14410.1	195	228	237	345	463	390	5.00291	0.400087	0.000431225	ssDNA-binding transcriptional regulator
AT1G14420.1	0	0	0	0	2	0	-2.35293	2.48318	0.750714	Pectate lyase family protein
AT1G14430.1	52	50	55	68	108	87	2.80168	0.282662	0.246161	glyoxal oxidase-related protein
AT1G14440.1	101	117	128	185	224	207	4.33718	0.373729	0.00323158	homeobox protein 31
AT1G14440.2	91	113	117	158	202	181	4.2294	0.294443	0.0346484	homeobox protein 31
AT1G14450.1	396	437	463	751	697	632	5.7451	0.224034	0.00935048	NADH dehydrogenase (ubiquinone)s
AT1G14455.1	5	9	1	8	5	4	-0.911323	-0.280799	0.863259	unknown protein
AT1G14460.1	240	245	277	337	337	361	4.7237	-0.0156647	1	AAA-type ATPase family protein
AT1G14470.1	8	16	14	15	16	15	0.806698	-0.179902	0.899023	Pentatricopeptide repeat (PPR) superfamily protein
AT1G14480.1	12	18	14	18	19	20	1.48328	-0.0842225	1	Ankyrin repeat family protein
AT1G14480.2	10	10	11	16	15	18	1.26034	0.200674	0.88642	Ankyrin repeat family protein
AT1G14490.1	7	5	9	8	18	10	0.506644	0.312723	0.775184	Predicted AT-hook DNA-binding family protein
AT1G14500.1	3	1	2	1	2	3	-1.88658	-0.432441	0.975121	Ankyrin repeat family protein
AT1G14510.1	312	299	367	419	451	419	5.23201	-0.0597752	0.688743	alfin-like 7
AT1G14520.1	19	22	24	35	17	14	1.33626	-0.432405	0.401982	myo-inositol oxygenase 1
AT1G14520.2	14	22	23	32	16	14	1.24077	-0.381047	0.45083	myo-inositol oxygenase 1
AT1G14530.1	47	43	56	63	56	74	2.36127	-0.0534338	0.992783	Protein of unknown function (DUF1084)
AT1G14530.2	57	53	67	69	68	87	2.60917	-0.11661	0.747296	Protein of unknown function (DUF1084)
AT1G14540.1	69	74	49	101	51	53	2.62734	-0.375618	0.508896	Peroxidase superfamily protein
AT1G14550.1	5	2	1	9	10	6	-0.336	1.15047	0.165773	Peroxidase superfamily protein
AT1G14560.1	150	156	172	186	204	204	4.03241	-0.144585	0.35431	Mitochondrial substrate carrier family protein
AT1G14570.1	415	468	491	554	589	516	5.58759	-0.186984	0.0281884	UBX domain-containing protein
AT1G14570.2	404	460	474	538	564	494	5.54638	-0.204662	0.0158319	UBX domain-containing protein
AT1G14570.3	393	449	471	536	570	493	5.53107	-0.174539	0.0449141	UBX domain-containing protein
AT1G14570.4	379	439	450	513	539	465	5.47823	-0.200373	0.0225571	UBX domain-containing protein
AT1G14580.1	183	191	267	320	368	373	4.95197	0.27423	0.0276708	C2H2-like zinc finger protein
AT1G14580.2	177	185	263	316	368	367	4.93404	0.297205	0.0173858	C2H2-like zinc finger protein
AT1G14590.1	73	75	93	101	102	98	3.35845	-0.137473	0.539524	Nucleotide-diphospho-sugar transferase family protein
AT1G14600.1	20	30	37	53	55	36	1.66829	0.269903	0.519336	Homeodomain-like superfamily protein
AT1G14610.1	1321	1358	1420	2252	2200	2106	7.34221	0.217782	0.00375108	valyl-tRNA synthetase / valine--tRNA ligase (VALRS)
AT1G14620.1	169	180	171	301	232	298	4.572	0.220046	0.183084	decoy
AT1G14620.2	151	164	148	269	210	269	4.40373	0.234937	0.146123	decoy
AT1G14630.1	37	27	49	58	56	39	2.40286	-0.0207493	1	unknown protein
AT1G14640.1	44	49	62	62	70	67	2.60291	-0.0972437	0.838654	SWAP (Suppressor-of-White-APricot)/surp domain-containing protein
AT1G14642.1	0	2	0	0	0	0	-2.26387	-2.87608	0.755439	unknown protein
AT1G14650.1	531	623	691	947	927	950	6.15972	0.15999	0.0746237	SWAP (Suppressor-of-White-APricot)/surp domain-containing protein / ubiquitin family protein
AT1G14650.2	521	605	663	911	903	916	6.10024	0.154806	0.0867149	SWAP (Suppressor-of-White-APricot)/surp domain-containing protein / ubiquitin family protein
AT1G14660.1	58	56	56	54	59	77	2.7825	-0.297193	0.20305	Na+/H+ exchanger 8
AT1G14660.2	55	52	51	55	56	75	2.74486	-0.222421	0.409005	Na+/H+ exchanger 8
AT1G14670.1	851	958	1017	1644	1429	1449	6.71593	0.222809	0.0332952	Endomembrane protein 70 protein family
AT1G14680.1	6	9	7	12	11	10	0.305399	0.124627	1	unknown protein
AT1G14685.1	198	210	211	280	287	294	4.74422	0.0173269	1	basic pentacysteine 2
AT1G14685.2	198	216	221	273	288	300	4.76788	-0.0186529	1	basic pentacysteine 2
AT1G14685.3	208	227	241	278	302	308	4.81472	-0.064013	0.765183	basic pentacysteine 2
AT1G14686.1	4	3	3	1	2	2	-1.61536	-1.385	0.297688	ENTH/ANTH/VHS superfamily protein
AT1G14687.1	12	18	14	12	17	14	1.12499	-0.488238	0.335676	homeobox protein 32
AT1G14688.1	0	0	0	0	0	0	-2.71529	0	1	unknown protein
AT1G14690.1	357	378	415	440	439	397	5.30685	-0.308556	0.000209589	microtubule-associated protein 65-7
AT1G14690.2	351	362	406	430	429	390	5.27467	-0.299963	0.000391014	microtubule-associated protein 65-7
AT1G14700.1	274	291	356	399	491	403	5.37823	0.0311482	0.915677	purple acid phosphatase 3
AT1G14700.2	259	272	331	370	459	367	5.29067	0.0136355	1	purple acid phosphatase 3
AT1G14710.1	573	617	626	1002	1095	1022	6.34106	0.320491	3.94e-06	hydroxyproline-rich glycoprotein family protein
AT1G14710.2	571	603	622	990	1072	1013	6.3287	0.316196	4.58e-06	hydroxyproline-rich glycoprotein family protein
AT1G14720.1	300	326	337	446	524	468	5.39797	0.118866	0.274664	xyloglucan endotransglucosylase/hydrolase 28
AT1G14730.1	141	150	136	251	144	188	3.82619	-0.00779414	1	Cytochrome b561/ferric reductase transmembrane protein family
AT1G14740.1	466	523	514	704	661	684	5.6569	-0.0109364	1	Protein of unknown function (DUF1423)
AT1G14750.1	6	11	12	19	23	17	0.725285	0.562627	0.293078	Cyclin family protein
AT1G14750.2	4	6	8	8	12	11	0.0188535	0.322311	0.746454	Cyclin family protein
AT1G14760.1	1	2	0	1	2	0	-1.71567	-0.409934	0.906611	KNOX Arabidopsis thaliana meinox
AT1G14760.2	1	2	0	1	3	3	-1.10186	0.705554	0.956437	KNOX Arabidopsis thaliana meinox
AT1G14760.3	2	2	0	1	1	3	-1.52264	-0.127001	1	KNOX Arabidopsis thaliana meinox
AT1G14770.1	64	68	68	87	94	107	2.9446	0.068157	0.91444	RING/FYVE/PHD zinc finger superfamily protein
AT1G14770.2	60	63	63	82	88	96	2.85804	0.0577258	0.948946	RING/FYVE/PHD zinc finger superfamily protein
AT1G14780.1	55	50	46	69	38	51	1.96636	-0.394665	0.356485	MAC/Perforin domain-containing protein
AT1G14790.1	142	131	145	144	151	152	3.77659	-0.362617	0.019327	RNA-dependent RNA polymerase 1
AT1G14800.1	0	0	1	2	0	0	-2.47194	0.431886	1	Nucleic acid-binding, OB-fold-like protein
AT1G14810.1	627	707	724	1346	1527	1379	6.67817	0.587375	3.93e-19	semialdehyde dehydrogenase family protein
AT1G14820.1	106	125	129	150	135	129	3.70617	-0.255858	0.121593	Sec14p-like phosphatidylinositol transfer family protein
AT1G14820.2	107	120	129	145	135	127	3.70916	-0.26453	0.107052	Sec14p-like phosphatidylinositol transfer family protein
AT1G14820.3	116	134	138	161	147	142	3.82452	-0.243885	0.117572	Sec14p-like phosphatidylinositol transfer family protein
AT1G14830.1	774	847	838	1279	1113	1208	6.49573	0.0925238	0.44374	DYNAMIN-like 1C
AT1G14840.1	375	364	433	483	579	518	5.51656	-0.0281391	0.922796	microtubule-associated proteins 70-4
AT1G14840.2	359	345	420	468	554	502	5.46166	-0.0194063	0.991342	microtubule-associated proteins 70-4
AT1G14850.1	303	365	401	630	644	635	5.53609	0.381389	2.69e-05	nucleoporin 155
AT1G14860.1	46	57	51	95	58	78	2.40551	0.129859	0.769529	nudix hydrolase homolog 18
AT1G14870.1	894	858	706	1132	532	788	6.08699	-0.466141	0.18152	PLANT CADMIUM RESISTANCE 2
AT1G14880.1	7	0	6	4	1	2	-1.5349	-1.29884	0.417206	PLANT CADMIUM RESISTANCE 1
AT1G14890.1	126	147	154	148	156	144	3.98341	-0.388702	0.0020701	Plant invertase/pectin methylesterase inhibitor superfamily protein
AT1G14900.1	322	304	364	391	396	407	5.45128	-0.187034	0.112207	high mobility group A
AT1G14910.1	239	265	327	406	384	398	4.99335	0.0619206	0.736599	ENTH/ANTH/VHS superfamily protein
AT1G14920.1	335	316	396	556	535	536	5.32233	0.179641	0.131231	GRAS family transcription factor family protein
AT1G14930.1	2	2	2	3	1	3	-1.50997	-0.219634	1	Polyketide cyclase/dehydrase and lipid transport superfamily protein
AT1G14940.1	1	0	0	0	0	0	-2.65746	-2.06186	1	Polyketide cyclase/dehydrase and lipid transport superfamily protein
AT1G14940.2	1	0	0	0	0	0	-2.65746	-2.06186	1	Polyketide cyclase/dehydrase and lipid transport superfamily protein
AT1G14950.1	1	0	0	0	0	0	-2.30779	-2.06901	1	Polyketide cyclase/dehydrase and lipid transport superfamily protein
AT1G14960.1	72	76	61	117	81	137	2.90024	0.224229	0.790065	Polyketide cyclase/dehydrase and lipid transport superfamily protein
AT1G14970.1	64	73	68	97	95	94	3.18024	0.0213754	1	O-fucosyltransferase family protein
AT1G14980.1	670	829	829	1230	1255	1236	6.77754	0.220621	0.0151121	chaperonin 10
AT1G14990.1	64	73	69	105	109	101	3.21085	0.153883	0.506268	unknown protein
AT1G14990.2	51	56	50	89	79	87	2.89975	0.240794	0.29102	unknown protein
AT1G15000.1	121	117	138	180	223	212	4.30077	0.251124	0.0992522	serine carboxypeptidase-like 50
AT1G15010.1	1	2	16	5	1	3	-0.744465	-1.42074	0.308642	unknown protein
AT1G15015.1	0	0	1	0	0	0	-2.60203	-2.05559	1	F-box family protein
AT1G15020.1	130	145	147	237	210	181	3.91245	0.113977	0.584988	quiescin-sulfhydryl oxidase 1
AT1G15020.2	150	165	157	266	248	204	4.0847	0.143599	0.436872	quiescin-sulfhydryl oxidase 1
AT1G15030.1	351	368	381	378	460	406	5.16225	-0.283418	0.00532357	Protein of unknown function (DUF789)
AT1G15040.1	29	30	38	37	36	57	1.55474	-0.0244001	1	Class I glutamine amidotransferase-like superfamily protein
AT1G15040.2	26	29	37	36	34	55	1.49513	-0.00275464	1	Class I glutamine amidotransferase-like superfamily protein
AT1G15050.1	4	1	1	0	0	4	-1.44778	-0.969683	0.79735	indole-3-acetic acid inducible 34
AT1G15060.1	344	406	378	472	501	425	5.25007	-0.151619	0.187023	Uncharacterised conserved protein UCP031088, alpha/beta hydrolase
AT1G15080.1	55	51	57	49	78	53	2.79432	-0.317836	0.197548	lipid phosphate phosphatase 2
AT1G15100.1	202	181	212	319	260	280	4.61849	0.0719269	0.743035	RING-H2 finger A2A
AT1G15110.1	133	133	113	211	151	177	3.74241	0.0453786	1	phosphatidyl serine synthase family protein
AT1G15110.2	125	127	101	206	145	170	3.65621	0.0975534	0.852787	phosphatidyl serine synthase family protein
AT1G15120.1	641	655	638	1115	953	975	6.24961	0.193021	0.0822186	Ubiquinol-cytochrome C reductase hinge protein
AT1G15120.2	483	507	493	881	752	745	5.87186	0.220898	0.0312967	Ubiquinol-cytochrome C reductase hinge protein
AT1G15125.1	22	10	14	25	8	9	0.70409	-0.596955	0.505999	S-adenosyl-L-methionine-dependent methyltransferases superfamily protein
[truncated: 31,402 more rows]
[truncated: 1 more columns]
