# Supplementary material for: Companion cells with high florigen production express other small proteins and reveal a nitrogen-sensitive FT repressor
Source: bioRxiv preprint, doi:10.1101/2024.08.17.608367, version 2 (2025-08-08)
Supplement: Supplemental data 11 [file 608367_file13.xlsx]

## Sheet: DataS11_WTvpSUC2NIGT1.2#3
reference_id	WT.rep1	WT.rep2	WT.rep3	pSUC2:NIGT1.2#3.rep1	pSUC2:NIGT1.2#3.rep2	pSUC2:NIGT1.2#3.rep3	logconc	logfc	adj_pvalue	annotation
AT1G01010.1	89	97	97	148	121	140	3.12693	0.0317921	1	NAC domain containing protein 1
AT1G01020.1	119	114	131	152	126	152	3.79172	-0.257319	0.110602	Arv1-like protein
AT1G01020.2	106	96	112	136	109	135	3.60884	-0.223731	0.258164	Arv1-like protein
AT1G01030.1	29	28	29	38	50	62	1.78451	0.307997	0.410574	AP2/B3-like transcriptional factor family protein
AT1G01040.1	481	590	517	666	592	682	5.79237	-0.210322	0.0272304	dicer-like 1
AT1G01040.2	451	564	497	635	564	652	5.72249	-0.206682	0.0298702	dicer-like 1
AT1G01046.1	4	2	7	3	3	4	-1.02578	-0.844266	0.422686	MIR838a; miRNA
AT1G01050.1	532	588	606	1027	924	973	6.03154	0.263406	0.000211873	pyrophosphorylase 1
AT1G01060.1	603	639	712	790	694	752	5.53085	-0.302101	3.4e-05	Homeodomain-like superfamily protein
AT1G01060.2	592	628	701	774	683	736	5.50604	-0.305405	5.06e-05	Homeodomain-like superfamily protein
AT1G01060.3	548	572	640	726	634	688	5.38814	-0.278239	0.000210272	Homeodomain-like superfamily protein
AT1G01060.4	598	624	702	787	685	757	5.51833	-0.284528	0.000107194	Homeodomain-like superfamily protein
AT1G01060.5	528	532	619	695	615	657	5.32362	-0.2681	0.00078897	Homeodomain-like superfamily protein
AT1G01070.1	130	140	142	174	143	182	3.77628	-0.222567	0.224457	nodulin MtN21 /EamA-like transporter family protein
AT1G01070.2	117	125	125	159	127	166	3.63153	-0.199543	0.345683	nodulin MtN21 /EamA-like transporter family protein
AT1G01080.1	529	537	635	1000	811	906	6.24894	0.177857	0.0368457	RNA-binding (RRM/RBD/RNP motifs) family protein
AT1G01080.2	486	497	591	932	743	844	6.14849	0.180641	0.0361963	RNA-binding (RRM/RBD/RNP motifs) family protein
AT1G01090.1	1207	1298	1435	2672	2498	2596	7.41138	0.483982	1.11e-16	pyruvate dehydrogenase E1 alpha
AT1G01100.1	1372	1532	1604	2929	2248	2457	7.65187	0.258911	0.00018457	60S acidic ribosomal protein family
AT1G01100.2	1617	1774	1896	3464	2645	2931	7.86165	0.272812	4.19e-05	60S acidic ribosomal protein family
AT1G01100.3	1252	1377	1439	2687	2106	2330	7.47475	0.307315	6.06e-06	60S acidic ribosomal protein family
AT1G01100.4	1366	1525	1600	2922	2234	2445	7.64609	0.258072	0.000201301	60S acidic ribosomal protein family
AT1G01110.1	33	48	45	94	73	61	2.24833	0.357114	0.211167	IQ-domain 18
AT1G01110.2	38	60	52	109	95	83	2.54538	0.43926	0.0412497	IQ-domain 18
AT1G01120.1	487	564	663	695	620	786	5.72818	-0.197649	0.149487	3-ketoacyl-CoA synthase 1
AT1G01130.1	14	9	5	7	8	12	0.104138	-0.555547	0.490516	unknown protein
AT1G01140.1	357	434	489	453	441	360	5.16467	-0.520471	1.1e-06	CBL-interacting protein kinase 9
AT1G01140.2	338	413	453	422	415	333	5.07822	-0.532666	1.22e-06	CBL-interacting protein kinase 9
AT1G01140.3	325	409	462	417	414	345	5.06566	-0.514068	1.63e-06	CBL-interacting protein kinase 9
AT1G01150.1	0	1	0	4	0	1	-1.85455	1.532	0.651792	Homeodomain-like protein with RING/FYVE/PHD-type zinc finger domain
AT1G01160.1	237	233	266	309	307	279	4.83194	-0.21355	0.0588114	GRF1-interacting factor 2
AT1G01160.2	216	212	247	276	288	256	4.70788	-0.214058	0.0744705	GRF1-interacting factor 2
AT1G01170.1	370	426	520	482	436	437	5.42211	-0.449955	8.13e-07	Protein of unknown function (DUF1138)
AT1G01170.2	290	351	423	398	342	362	5.14744	-0.442146	3.1e-06	Protein of unknown function (DUF1138)
AT1G01180.1	62	58	56	75	73	100	2.77201	-0.00410195	1	S-adenosyl-L-methionine-dependent methyltransferases superfamily protein
AT1G01183.1	0	0	0	0	1	0	-2.68611	1.7158	1	MIR165/MIR165A; miRNA
AT1G01190.1	175	171	145	319	253	322	4.13047	0.354269	0.113779	cytochrome P450, family 78, subfamily A, polypeptide 8
AT1G01200.1	26	24	28	54	33	45	1.73492	0.257292	0.514969	RAB GTPase homolog A3
AT1G01210.1	87	96	113	162	155	168	3.86046	0.21733	0.177689	DNA-directed RNA polymerase, subunit M, archaeal
AT1G01220.1	321	284	413	483	488	450	5.17232	-0.00985906	1	L-fucokinase/GDP-L-fucose pyrophosphorylase
AT1G01225.1	25	31	43	49	44	55	2.01331	0.08561	0.878632	NC domain-containing protein-related
AT1G01230.1	179	168	201	286	259	291	4.41056	0.112658	0.440227	ORMDL family protein
AT1G01240.1	206	186	236	123	114	131	3.96302	-1.26639	1.45e-28	unknown protein
AT1G01240.2	199	173	222	116	116	123	3.91493	-1.23772	9.96e-25	unknown protein
AT1G01240.3	212	186	240	121	122	136	4.01592	-1.24622	2.29e-27	unknown protein
AT1G01250.1	66	35	60	28	42	41	2.49943	-1.029	4e-05	Integrase-type DNA-binding superfamily protein
AT1G01260.1	129	156	169	244	237	223	4.0615	0.138828	0.394963	basic helix-loop-helix (bHLH) DNA-binding superfamily protein
AT1G01260.2	119	144	156	232	222	211	3.98875	0.172282	0.300197	basic helix-loop-helix (bHLH) DNA-binding superfamily protein
AT1G01260.3	127	151	161	237	230	218	4.02908	0.147214	0.361127	basic helix-loop-helix (bHLH) DNA-binding superfamily protein
AT1G01280.1	0	0	0	0	0	0	-0.176019	-5.13e-15	1	cytochrome P450, family 703, subfamily A, polypeptide 2
AT1G01290.1	99	99	124	131	145	145	3.57386	-0.107047	0.647039	cofactor of nitrate reductase and xanthine dehydrogenase 3
AT1G01290.2	105	106	131	134	159	141	3.61418	-0.148993	0.444041	cofactor of nitrate reductase and xanthine dehydrogenase 3
AT1G01300.1	376	407	439	912	705	807	5.90024	0.488244	2.41e-08	Eukaryotic aspartyl protease family protein
AT1G01310.1	0	2	1	0	1	1	-2.30749	-0.934409	1	CAP (Cysteine-rich secretory proteins, Antigen 5, and Pathogenesis-related 1 protein) superfamily protein
AT1G01320.1	4168	4657	5273	7450	6502	6884	9.11399	0.0692278	0.535057	Tetratricopeptide repeat (TPR)-like superfamily protein
AT1G01320.2	4121	4628	5252	7428	6463	6841	9.10448	0.0721569	0.513012	Tetratricopeptide repeat (TPR)-like superfamily protein
AT1G01340.1	75	67	72	93	72	89	2.66756	-0.254413	0.318003	cyclic nucleotide gated channel 10
AT1G01340.2	81	70	73	103	79	95	2.76104	-0.198013	0.522283	cyclic nucleotide gated channel 10
AT1G01350.1	160	178	174	229	228	223	4.28566	-0.0869421	0.649606	Zinc finger (CCCH-type/C3HC4-type RING finger) family protein
AT1G01355.1	0	0	0	1	0	0	-2.44755	1.71134	1	Putative endonuclease or glycosyl hydrolase
AT1G01360.1	161	121	150	140	109	126	3.75765	-0.705378	8.22e-07	regulatory component of ABA receptor 1
AT1G01370.1	66	45	52	62	71	81	2.79356	-0.104827	0.7659	Histone superfamily protein
AT1G01370.2	67	46	54	62	75	83	2.81741	-0.0995232	0.779221	Histone superfamily protein
AT1G01380.1	12	11	23	23	25	25	0.815208	0.172406	0.761699	Homeodomain-like superfamily protein
AT1G01390.1	75	91	104	82	62	63	3.21881	-0.877985	2.02e-07	UDP-Glycosyltransferase superfamily protein
AT1G01400.1	0	0	0	0	0	0	-2.62964	-5.13e-15	1	unknown protein
AT1G01420.1	92	87	113	120	114	120	3.73812	-0.216989	0.274471	UDP-glucosyl transferase 72B3
AT1G01430.1	437	439	485	606	568	661	5.6826	-0.0655485	0.664664	TRICHOME BIREFRINGENCE-LIKE 25
AT1G01440.1	127	147	161	186	169	197	3.9666	-0.152067	0.303999	Protein of unknown function (DUF3133)
AT1G01450.1	42	40	40	39	50	43	2.11093	-0.381019	0.187068	Protein kinase superfamily protein
AT1G01453.1	2	1	3	14	9	5	-1.24164	1.67129	0.0867637	unknown protein
AT1G01453.2	2	1	1	13	7	5	-1.36344	2.04397	0.0779031	unknown protein
AT1G01460.1	0	1	0	0	0	0	-2.68607	-2.07597	1	Phosphatidylinositol-4-phosphate 5-kinase, core
AT1G01470.1	465	558	588	437	523	525	6.26338	-0.605697	4.78e-09	Late embryogenesis abundant protein
AT1G01480.1	7	9	11	18	9	16	-0.0331394	0.17102	0.933158	1-amino-cyclopropane-1-carboxylate synthase 2
AT1G01480.2	5	7	9	16	6	13	-0.214623	0.234752	0.903743	1-amino-cyclopropane-1-carboxylate synthase 2
AT1G01490.1	556	571	670	670	650	672	5.78547	-0.345391	3.44e-05	Heavy metal transport/detoxification superfamily protein
AT1G01490.2	521	543	644	651	616	613	5.698	-0.3555	3.06e-05	Heavy metal transport/detoxification superfamily protein
AT1G01500.1	98	122	128	202	186	200	4.15224	0.261135	0.0635065	Erythronate-4-phosphate dehydrogenase family protein
AT1G01510.1	342	413	444	676	566	618	5.53956	0.13747	0.164592	NAD(P)-binding Rossmann-fold superfamily protein
AT1G01520.1	52	54	78	43	43	44	2.38478	-0.993112	3.26e-07	Homeodomain-like superfamily protein
AT1G01540.1	553	606	677	763	680	724	5.90736	-0.256579	0.000378188	Protein kinase superfamily protein
AT1G01540.2	577	629	710	805	723	760	5.98091	-0.23947	0.000863189	Protein kinase superfamily protein
AT1G01550.1	1031	1093	1163	1295	1146	1228	6.76464	-0.339137	2.69e-08	Protein of unknown function (DUF793)
AT1G01550.2	983	1041	1117	1240	1083	1176	6.70278	-0.34205	2.43e-08	Protein of unknown function (DUF793)
AT1G01560.1	17	33	12	20	6	15	0.586016	-1.11794	0.0887405	MAP kinase 11
AT1G01560.2	18	42	16	21	6	16	0.748031	-1.33886	0.0363331	MAP kinase 11
AT1G01570.1	23	21	24	28	25	34	1.26759	-0.140878	0.859116	Protein of unknown function (DUF604)
AT1G01580.1	133	117	113	49	64	193	3.54323	-0.746438	0.307422	ferric reduction oxidase 2
AT1G01590.1	4	2	7	0	2	2	-0.644711	-2.07607	0.0351171	ferric reduction oxidase 1
AT1G01600.1	74	88	105	170	149	153	3.5501	0.327979	0.0868984	cytochrome P450, family 86, subfamily A, polypeptide 4
AT1G01610.1	372	425	468	815	752	802	5.70298	0.410527	3.11e-07	glycerol-3-phosphate acyltransferase 4
AT1G01620.1	3041	2994	3420	4219	3724	4132	8.29363	-0.145279	0.0354654	plasma membrane intrinsic protein 1C
AT1G01620.2	2701	2646	3044	3763	3312	3657	8.12784	-0.143116	0.0437911	plasma membrane intrinsic protein 1C
AT1G01630.1	393	518	565	882	703	807	5.84227	0.201659	0.0187728	Sec14p-like phosphatidylinositol transfer family protein
AT1G01640.1	38	38	45	70	45	55	1.96799	-0.0105223	1	BTB/POZ domain-containing protein
AT1G01640.2	34	37	42	62	40	54	1.86013	-0.0347534	1	BTB/POZ domain-containing protein
AT1G01650.1	238	276	342	439	415	444	5.00888	0.110689	0.511858	SIGNAL PEPTIDE PEPTIDASE-LIKE 4
AT1G01650.2	230	271	338	428	404	432	4.97335	0.10178	0.561291	SIGNAL PEPTIDE PEPTIDASE-LIKE 4
AT1G01660.1	14	22	7	30	22	27	0.54414	0.364879	0.58557	RING/U-box superfamily protein
AT1G01670.1	9	15	15	14	12	20	0.656894	-0.25359	0.726644	RING/U-box superfamily protein
AT1G01680.1	3	1	5	4	3	5	-0.783468	-0.0728117	1	plant U-box 54
AT1G01690.1	51	61	69	100	83	108	2.90377	0.188718	0.410375	putative recombination initiation defects 3
AT1G01695.1	9	5	10	5	11	4	-0.628507	-0.741929	0.341189	Phosphatidylinositol N-acetyglucosaminlytransferase subunit P-related
AT1G01700.1	14	17	11	21	31	17	1.01617	0.218995	0.698787	RHO guanyl-nucleotide exchange factor 2
AT1G01710.1	264	334	291	408	398	355	5.00863	-0.111784	0.445775	Acyl-CoA thioesterase family protein
AT1G01720.1	501	661	659	561	544	530	5.63904	-0.647433	3.88e-11	NAC (No Apical Meristem) domain transcriptional regulator superfamily protein
AT1G01725.1	39	47	58	43	43	59	2.2318	-0.481202	0.0674488	unknown protein
AT1G01730.1	128	138	157	172	151	168	3.95969	-0.280967	0.0327024	unknown protein
AT1G01740.1	65	57	59	71	61	71	2.85528	-0.331892	0.0991555	Protein kinase protein with tetratricopeptide repeat domain
AT1G01740.2	69	59	60	74	64	73	2.9191	-0.331361	0.102456	Protein kinase protein with tetratricopeptide repeat domain
AT1G01750.1	92	77	48	179	127	189	2.76289	0.663179	0.0379131	actin depolymerizing factor 11
AT1G01760.1	23	39	27	41	26	47	1.75595	-0.143073	0.821094	adenosine deaminases;RNA binding;RNA binding;adenosine deaminases
AT1G01770.1	178	182	234	212	223	207	4.26132	-0.379943	0.00218764	unknown protein
AT1G01780.1	83	102	93	124	110	104	3.33183	-0.215752	0.335306	GATA type zinc finger transcription factor family protein
AT1G01790.1	2050	2077	2403	2573	2143	2453	7.9003	-0.363429	2.07e-08	K+ efflux antiporter 1
AT1G01800.1	607	585	741	867	786	768	6.04309	-0.170148	0.0513289	NAD(P)-binding Rossmann-fold superfamily protein
AT1G01800.2	558	560	708	825	754	720	5.96206	-0.161641	0.0680932	NAD(P)-binding Rossmann-fold superfamily protein
AT1G01810.1	5	4	3	5	5	12	-0.212098	0.367859	0.839367	unknown protein
AT1G01820.1	294	313	339	411	331	391	5.27933	-0.237873	0.0175621	peroxin 11c
AT1G01830.1	183	178	179	277	212	239	4.33667	-0.0710717	0.733228	ARM repeat superfamily protein
AT1G01830.2	187	184	188	284	215	247	4.36852	-0.085338	0.642205	ARM repeat superfamily protein
AT1G01830.3	188	189	196	298	223	257	4.40952	-0.0597688	0.775953	ARM repeat superfamily protein
AT1G01840.1	36	31	41	38	36	51	1.96162	-0.284204	0.367826	unknown protein
AT1G01860.1	135	137	164	179	135	168	3.93515	-0.352686	0.0122977	Ribosomal RNA adenine dimethylase family protein
AT1G01880.1	9	20	22	24	31	21	1.27918	0.0867377	0.984779	5'-3' exonuclease family protein
AT1G01880.2	9	20	19	22	29	19	1.22455	0.0547645	1	5'-3' exonuclease family protein
AT1G01900.1	196	180	203	343	317	295	4.49615	0.224087	0.0641589	subtilase family protein
AT1G01910.1	386	405	456	705	494	645	5.50459	0.0637465	0.662099	P-loop containing nucleoside triphosphate hydrolases superfamily protein
AT1G01910.2	438	460	507	780	563	712	5.69867	0.0479485	0.758303	P-loop containing nucleoside triphosphate hydrolases superfamily protein
AT1G01910.3	416	427	488	725	523	676	5.6195	0.0314398	0.898058	P-loop containing nucleoside triphosphate hydrolases superfamily protein
AT1G01910.4	403	415	460	720	498	647	5.5314	0.0436092	0.816286	P-loop containing nucleoside triphosphate hydrolases superfamily protein
AT1G01910.5	345	372	410	648	469	598	5.42321	0.106059	0.347406	P-loop containing nucleoside triphosphate hydrolases superfamily protein
AT1G01920.1	110	114	109	185	166	174	3.94831	0.158891	0.346387	SET domain-containing protein
AT1G01920.2	120	129	125	207	188	202	4.11796	0.176952	0.265204	SET domain-containing protein
AT1G01930.1	141	150	147	225	198	200	4.05574	0.0106528	1	zinc finger protein-related
AT1G01940.1	75	95	81	175	143	151	3.60018	0.402382	0.0166992	Cyclophilin-like peptidyl-prolyl cis-trans isomerase family protein
AT1G01950.1	224	262	281	361	327	346	4.73698	-0.0646603	0.685948	armadillo repeat kinesin 2
AT1G01950.2	217	246	267	344	307	321	4.66079	-0.0829559	0.567816	armadillo repeat kinesin 2
AT1G01950.3	219	256	274	355	316	332	4.69597	-0.0745804	0.61697	armadillo repeat kinesin 2
AT1G01960.1	733	820	909	1462	1290	1410	6.50369	0.261976	0.000118128	SEC7-like guanine nucleotide exchange family protein
AT1G01970.1	278	329	373	426	400	398	5.26877	-0.172442	0.13101	Tetratricopeptide repeat (TPR)-like superfamily protein
AT1G01980.1	0	0	0	0	0	2	-2.47204	2.47465	0.726644	FAD-binding Berberine family protein
AT1G01990.1	129	157	174	202	153	170	4.21049	-0.30575	0.0192368	unknown protein
AT1G02000.1	84	103	105	155	115	153	3.36277	0.0369619	0.972048	UDP-D-glucuronate 4-epimerase 2
AT1G02010.1	150	158	170	193	168	166	4.04763	-0.356215	0.004823	secretory 1A
AT1G02010.2	122	129	149	161	145	135	3.78761	-0.355106	0.00775614	secretory 1A
AT1G02020.1	115	128	146	188	142	152	3.8266	-0.187702	0.208628	nitroreductase family protein
AT1G02020.2	107	121	140	178	140	147	3.74696	-0.158958	0.325272	nitroreductase family protein
AT1G02030.1	5	8	4	19	10	8	-0.27487	0.607896	0.469557	C2H2-like zinc finger protein
AT1G02040.1	0	0	0	0	0	0	-2.65766	-5.13e-15	1	C2H2-type zinc finger family protein
AT1G02050.1	45	54	50	69	52	61	3.03327	-0.214155	0.778475	Chalcone and stilbene synthase family protein
AT1G02060.1	59	79	75	109	81	74	2.91931	-0.187785	0.40692	Tetratricopeptide repeat (TPR)-like superfamily protein
AT1G02065.1	29	22	33	9	14	13	1.49493	-1.70572	6.34e-08	squamosa promoter binding protein-like 8
AT1G02065.2	27	17	31	10	13	10	1.38148	-1.66653	1.25e-06	squamosa promoter binding protein-like 8
AT1G02070.1	0	5	3	5	3	2	-1.10163	-0.166316	1	unknown protein
AT1G02074.1	0	0	0	0	0	1	-2.71525	1.71336	1	unknown protein
AT1G02080.1	1376	1520	1572	2181	1746	2116	7.24857	-0.0648249	0.599374	transcription regulators
AT1G02080.2	1407	1541	1598	2216	1769	2149	7.26866	-0.0685171	0.578151	transcription regulators
AT1G02090.1	243	298	330	465	413	426	5.09106	0.0874577	0.474184	Proteasome component (PCI) domain protein
AT1G02090.2	241	290	321	456	400	414	5.05614	0.0805841	0.513662	Proteasome component (PCI) domain protein
AT1G02090.3	254	297	339	480	423	430	5.12323	0.0876286	0.451562	Proteasome component (PCI) domain protein
AT1G02100.1	251	298	291	362	328	361	4.8943	-0.173345	0.110003	Leucine carboxyl methyltransferase
AT1G02100.2	234	267	262	323	292	336	4.7549	-0.17933	0.119001	Leucine carboxyl methyltransferase
AT1G02100.3	249	295	285	354	323	360	4.87244	-0.173775	0.117112	Leucine carboxyl methyltransferase
AT1G02110.1	191	216	244	450	367	385	4.93155	0.387771	0.000120305	Protein of unknown function (DUF630 and DUF632)
AT1G02120.1	545	591	695	722	669	651	5.90646	-0.336897	2.34e-06	GRAM domain family protein
AT1G02130.1	363	449	442	586	571	532	5.53638	-0.065199	0.620234	RAS 5
AT1G02140.1	766	797	879	1276	1086	1167	6.60447	0.033286	0.789	mago nashi family protein
AT1G02145.1	169	200	211	272	250	218	4.39533	-0.1441	0.3218	homolog of asparagine-linked glycosylation 12
AT1G02145.2	134	152	142	202	188	173	3.96352	-0.101683	0.556063	homolog of asparagine-linked glycosylation 12
AT1G02145.3	181	204	221	285	259	233	4.46183	-0.137346	0.318121	homolog of asparagine-linked glycosylation 12
AT1G02145.4	182	207	212	274	250	228	4.41968	-0.173179	0.188184	homolog of asparagine-linked glycosylation 12
AT1G02150.1	889	943	1110	1750	1529	1587	7.05493	0.230808	0.00347118	Tetratricopeptide repeat (TPR)-like superfamily protein
AT1G02160.1	106	147	127	210	172	167	4.05282	0.032679	0.983894	Cox19 family protein (CHCH motif)
AT1G02160.2	88	125	107	180	141	148	3.86476	0.0532268	0.895293	Cox19 family protein (CHCH motif)
AT1G02170.1	176	192	195	301	279	301	4.39511	0.148987	0.325272	metacaspase 1
AT1G02180.1	38	21	39	90	54	63	2.50203	0.575868	0.0182735	ferredoxin-related
AT1G02190.1	36	34	38	4	14	11	1.75992	-2.37267	3.42e-12	Fatty acid hydroxylase superfamily
AT1G02190.2	35	34	37	3	13	10	1.68653	-2.50104	2.57e-13	Fatty acid hydroxylase superfamily
AT1G02205.1	676	1075	1250	572	806	768	6.61126	-0.950952	3.18e-07	Fatty acid hydroxylase superfamily
AT1G02205.2	697	1108	1295	590	822	786	6.64891	-0.963296	2.01e-07	Fatty acid hydroxylase superfamily
AT1G02205.3	635	1006	1184	534	741	718	6.50662	-0.97059	2.32e-07	Fatty acid hydroxylase superfamily
AT1G02220.1	254	245	239	258	231	280	4.36064	-0.444902	0.10491	NAC domain containing protein 3
AT1G02230.1	16	27	17	20	22	29	0.781716	-0.251979	0.757917	NAC domain containing protein 4
AT1G02250.1	6	4	4	2	9	4	-0.453438	-0.379873	0.851782	NAC domain containing protein 5
AT1G02260.1	150	147	155	215	172	171	3.95982	-0.196333	0.237183	Divalent ion symporter
AT1G02270.1	208	204	225	271	235	244	4.55489	-0.261777	0.0132829	Calcium-binding endonuclease/exonuclease/phosphatase family
AT1G02280.1	474	561	598	975	871	855	6.1534	0.230841	0.00953063	translocon at the outer envelope membrane of chloroplasts 33
AT1G02280.2	462	548	584	941	841	820	6.11136	0.211868	0.0197172	translocon at the outer envelope membrane of chloroplasts 33
AT1G02290.1	77	95	121	144	131	132	3.49707	-0.0204782	1	unknown protein
AT1G02300.1	107	82	125	113	137	92	3.81678	-0.366781	0.085536	Cysteine proteinases superfamily protein
AT1G02305.1	796	781	845	1052	926	971	6.25949	-0.215601	0.0101471	Cysteine proteinases superfamily protein
AT1G02310.1	29	24	18	35	42	38	1.51594	0.189869	0.852557	Glycosyl hydrolase superfamily protein
AT1G02320.1	0	0	0	0	0	0	-2.65762	-5.13e-15	1	unknown protein
AT1G02330.1	218	246	279	424	411	356	4.94657	0.186249	0.0763288	unknown protein
AT1G02335.1	172	186	217	218	196	194	4.18474	-0.413513	0.0279194	germin-like protein subfamily 2 member 2 precursor
AT1G02340.1	316	304	351	120	157	163	5.19798	-1.63227	1.48e-27	basic helix-loop-helix (bHLH) DNA-binding superfamily protein
AT1G02350.1	10	14	7	9	16	12	0.60196	-0.237882	0.823878	protoporphyrinogen oxidase-related
AT1G02360.1	240	264	205	325	293	332	4.48513	-0.085974	0.902591	Chitinase family protein
AT1G02370.1	65	88	70	139	122	134	3.38243	0.325464	0.151868	Tetratricopeptide repeat (TPR)-like superfamily protein
AT1G02380.1	11	24	30	37	31	27	1.45678	0.0565466	1	unknown protein
AT1G02390.1	18	28	29	54	33	38	1.80134	0.237458	0.639736	glycerol-3-phosphate acyltransferase 2
AT1G02400.1	51	62	47	81	75	79	2.53737	0.0528195	1	gibberellin 2-oxidase 6
AT1G02405.1	0	0	2	5	0	1	-1.80654	0.979252	0.689411	proline-rich family protein
AT1G02410.1	161	171	211	264	259	262	4.38342	0.037124	0.881533	cytochrome c oxidase assembly protein CtaG / Cox11 family
AT1G02420.1	26	33	45	62	47	61	2.19722	0.212352	0.457509	Pentatricopeptide repeat (PPR) superfamily protein
AT1G02430.1	15	13	10	31	17	17	0.912539	0.272544	0.67176	ADP-ribosylation factor D1B
AT1G02440.1	5	1	4	5	5	3	-1.27427	-0.117631	1	ADP-ribosylation factor D1A
AT1G02450.1	7	7	7	4	6	2	-0.347104	-1.27277	0.0943528	NIM1-interacting 1
AT1G02460.1	26	18	24	53	42	60	1.80395	0.68602	0.0289461	Pectin lyase-like superfamily protein
AT1G02470.1	6	8	11	5	4	4	-0.0276046	-1.40752	0.0218837	Polyketide cyclase/dehydrase and lipid transport superfamily protein
AT1G02470.2	6	6	10	5	5	4	-0.141755	-1.12158	0.108065	Polyketide cyclase/dehydrase and lipid transport superfamily protein
AT1G02475.1	439	425	583	487	460	483	5.49432	-0.508593	3.8e-08	Polyketide cyclase/dehydrase and lipid transport superfamily protein
AT1G02490.1	0	1	0	1	0	0	-2.497	-0.364647	1	unknown protein
AT1G02500.1	2882	3105	3040	4712	3999	4287	8.29594	0.0234985	0.940555	S-adenosylmethionine synthetase 1
AT1G02500.2	2743	2967	2914	4530	3839	4116	8.23872	0.0315472	0.874824	S-adenosylmethionine synthetase 1
AT1G02510.1	0	0	0	0	0	0	-2.47223	-5.13e-15	1	Outward rectifying potassium channel protein
AT1G02520.1	303	320	229	456	333	457	4.66823	0.029482	1	P-glycoprotein 11
AT1G02530.1	28	36	17	40	38	46	1.47038	0.105795	0.957089	P-glycoprotein 12
AT1G02560.1	1631	1841	2093	2935	2759	2787	7.8192	0.115666	0.14929	nuclear encoded CLP protease 5
AT1G02570.1	4	0	1	7	4	7	-1.4229	1.29191	0.222591	unknown protein
AT1G02575.1	1	2	1	1	5	2	-1.70018	0.476949	0.961078	unknown protein
AT1G02580.1	0	3	2	4	5	3	-1.22176	0.73373	0.694077	SET domain-containing protein
AT1G02610.1	27	17	26	15	12	23	0.913899	-0.979171	0.016758	RING/FYVE/PHD zinc finger superfamily protein
AT1G02620.1	0	0	1	0	0	0	-2.20108	-2.07115	1	Ras-related small GTP-binding family protein
AT1G02630.1	9	7	13	4	0	3	-0.222825	-2.4749	6.52e-05	Nucleoside transporter family protein
AT1G02630.2	6	5	12	4	0	2	-0.510917	-2.35162	0.000604854	Nucleoside transporter family protein
AT1G02640.1	109	108	96	147	133	118	3.36615	-0.155317	0.526133	beta-xylosidase 2
AT1G02650.1	3	4	7	7	5	4	-0.774815	-0.29443	0.917332	Tetratricopeptide repeat (TPR)-like superfamily protein
AT1G02660.1	37	37	53	56	40	52	2.19808	-0.274703	0.31714	alpha/beta-Hydrolases superfamily protein
AT1G02670.1	16	25	26	17	14	19	1.39303	-0.909869	0.0184149	P-loop containing nucleoside triphosphate hydrolases superfamily protein
AT1G02680.1	73	89	91	128	119	98	3.30237	-0.0482678	0.960648	TBP-associated factor 13
AT1G02681.1	0	0	0	0	0	0	-2.68618	-5.13e-15	1	pseudogene
AT1G02690.1	152	168	175	389	290	355	4.46298	0.562094	8.91e-06	importin alpha isoform 6
AT1G02690.2	144	161	160	369	281	343	4.40068	0.593496	6.36e-06	importin alpha isoform 6
AT1G02700.1	11	6	9	19	18	20	0.539384	0.627701	0.310057	unknown protein
AT1G02710.1	5	7	11	20	21	17	0.483373	0.831843	0.0701026	glycine-rich protein
AT1G02720.1	83	110	122	213	195	207	3.80425	0.470702	0.000444475	galacturonosyltransferase 5
AT1G02720.2	59	84	99	174	158	162	3.44786	0.53597	0.000381641	galacturonosyltransferase 5
AT1G02730.1	323	388	422	1050	843	810	5.65436	0.757303	1.81e-13	cellulose synthase-like D5
AT1G02740.1	59	76	62	119	64	85	2.92933	-0.0597329	0.894661	MRG family protein
AT1G02750.1	100	106	79	123	125	102	3.27906	-0.204837	0.352782	Drought-responsive family protein
AT1G02750.2	85	81	59	106	99	78	2.94069	-0.174142	0.512079	Drought-responsive family protein
AT1G02770.1	1	3	8	8	3	5	-0.920307	-0.0727038	1	Protein of unknown function (DUF626)
AT1G02780.1	4956	5464	5807	12112	9950	10536	9.51813	0.507027	5.74e-25	Ribosomal protein L19e family protein
AT1G02800.1	43	47	60	79	64	59	2.8673	-0.0662918	0.929443	cellulase 2
AT1G02810.1	78	74	72	130	110	94	2.92711	0.0719637	0.92844	Plant invertase/pectin methylesterase inhibitor superfamily
AT1G02813.1	0	1	0	4	1	3	-1.30876	2.17509	0.258189	Protein of unknown function, DUF538
AT1G02816.1	159	186	191	168	186	204	3.7535	-0.434338	0.00367487	Protein of unknown function, DUF538
AT1G02820.1	295	325	387	211	232	229	5.20588	-1.07091	3.39e-11	Late embryogenesis abundant 3 (LEA3) family protein
AT1G02830.1	0	0	1	1	1	0	-2.35266	0.402311	1	Ribosomal L22e protein family
AT1G02840.1	744	781	920	1272	1038	1168	6.68134	0.0115173	1	RNA-binding (RRM/RBD/RNP motifs) family protein
AT1G02840.2	766	817	935	1283	1049	1172	6.72977	-0.0205111	0.913516	RNA-binding (RRM/RBD/RNP motifs) family protein
AT1G02840.3	708	757	895	1213	996	1118	6.6315	-0.000891588	1	RNA-binding (RRM/RBD/RNP motifs) family protein
AT1G02850.1	217	394	616	238	276	259	4.50866	-1.12345	1.75e-06	beta glucosidase 11
AT1G02850.2	216	391	614	238	273	266	4.50834	-1.10914	2.47e-06	beta glucosidase 11
AT1G02850.3	210	386	602	234	271	257	4.48358	-1.10947	2.63e-06	beta glucosidase 11
AT1G02850.4	207	374	588	234	269	256	4.46068	-1.08028	4.29e-06	beta glucosidase 11
AT1G02850.5	218	396	625	241	281	268	4.54109	-1.1055	2.81e-06	beta glucosidase 11
AT1G02860.1	71	70	84	88	77	99	3.02661	-0.265277	0.232944	SPX (SYG1/Pho81/XPR1) domain-containing protein
AT1G02860.2	64	58	81	79	69	86	2.8838	-0.289951	0.175333	SPX (SYG1/Pho81/XPR1) domain-containing protein
AT1G02870.1	124	125	131	248	222	236	4.29974	0.395836	0.00190029	unknown protein
AT1G02880.1	115	136	143	199	210	217	3.87758	0.175428	0.374022	thiamin pyrophosphokinase1
AT1G02880.2	119	142	146	209	218	226	3.92086	0.189011	0.319657	thiamin pyrophosphokinase1
AT1G02880.3	120	143	152	214	222	231	3.94885	0.192174	0.311015	thiamin pyrophosphokinase1
AT1G02880.4	120	139	145	210	223	222	3.9278	0.204221	0.277714	thiamin pyrophosphokinase1
AT1G02890.1	903	976	980	1319	1095	1155	6.56206	-0.180725	0.025344	AAA-type ATPase family protein
AT1G02890.2	856	926	918	1218	1022	1092	6.46621	-0.197349	0.0158016	AAA-type ATPase family protein
AT1G02900.1	174	169	170	257	241	244	4.03237	0.0326294	0.994819	rapid alkalinization factor 1
AT1G02910.1	460	513	614	688	603	591	5.81164	-0.247619	0.010681	tetratricopeptide repeat (TPR)-containing protein
AT1G02920.1	1484	2034	1407	1232	763	1258	6.68275	-1.11422	0.00207546	glutathione S-transferase 7
AT1G02930.1	1089	1521	1146	802	541	946	6.23376	-1.22334	0.000109901	glutathione S-transferase 6
AT1G02930.2	983	1376	1030	730	480	834	6.0794	-1.23922	6.31e-05	glutathione S-transferase 6
AT1G02940.1	1	4	4	5	3	5	-1.14985	0.0341679	1	glutathione S-transferase (class phi) 5
AT1G02950.1	66	59	78	88	95	98	2.99165	-0.024929	1	glutathione S-transferase F4
AT1G02950.2	63	55	77	83	86	95	2.903	-0.0569532	0.935768	glutathione S-transferase F4
AT1G02950.3	59	52	71	82	86	91	2.86054	0.0151513	1	glutathione S-transferase F4
AT1G02950.4	58	50	67	76	76	85	2.7052	-0.0576412	0.946255	glutathione S-transferase F4
AT1G02960.1	146	128	165	148	157	180	3.88021	-0.350424	0.0195923	unknown protein
AT1G02960.2	147	131	165	152	161	186	3.92151	-0.322396	0.0422179	unknown protein
AT1G02960.3	144	142	167	150	161	187	3.91899	-0.357229	0.0139635	unknown protein
AT1G02965.1	0	0	0	0	0	0	-2.68614	-5.13e-15	1	unknown protein
AT1G02970.1	56	39	52	74	68	78	2.58964	0.0840555	0.864314	WEE1 kinase homolog
AT1G02980.1	0	3	2	1	2	0	-1.58909	-1.12156	0.502214	cullin 2
AT1G02990.1	251	296	304	336	302	328	4.73355	-0.313135	0.0021636	unknown protein
AT1G02990.2	259	300	311	340	311	335	4.75929	-0.315337	0.00130978	unknown protein
AT1G02990.3	262	304	315	349	319	343	4.78654	-0.297353	0.00224337	unknown protein
AT1G03000.1	254	295	320	363	330	357	5.03734	-0.222274	0.0311368	peroxin 6
AT1G03010.1	9	11	13	17	18	27	0.388681	0.41227	0.453197	Phototropic-responsive NPH3 family protein
AT1G03020.1	16	12	16	3	1	3	0.086145	-3.07341	5.22e-08	Thioredoxin superfamily protein
AT1G03030.1	119	154	183	170	168	163	3.83239	-0.357698	0.00423837	P-loop containing nucleoside triphosphate hydrolases superfamily protein
AT1G03040.1	347	348	416	448	445	415	5.29756	-0.259132	0.00333527	basic helix-loop-helix (bHLH) DNA-binding superfamily protein
AT1G03040.2	327	327	400	417	421	397	5.21819	-0.265478	0.00323331	basic helix-loop-helix (bHLH) DNA-binding superfamily protein
AT1G03050.1	1	0	1	0	1	2	-2.14011	0.0782848	1	ENTH/ANTH/VHS superfamily protein
AT1G03055.1	86	86	125	93	72	86	3.38465	-0.736189	7.84e-06	unknown protein
AT1G03055.2	78	80	117	82	65	86	3.26589	-0.731892	1.49e-05	unknown protein
AT1G03060.1	616	748	777	1321	1073	1221	6.22404	0.258566	0.0136016	Beige/BEACH domain ;WD domain, G-beta repeat protein
AT1G03070.1	24	28	14	26	23	15	1.2045	-0.5468	0.18507	Bax inhibitor-1 family protein
AT1G03070.2	21	28	16	25	17	18	1.13865	-0.615392	0.100215	Bax inhibitor-1 family protein
AT1G03080.1	806	884	933	1491	1279	1358	6.47891	0.155939	0.168202	kinase interacting (KIP1-like) family protein
AT1G03090.1	185	197	224	330	283	315	4.32315	0.118235	0.473823	methylcrotonyl-CoA carboxylase alpha chain, mitochondrial / 3-methylcrotonyl-CoA carboxylase 1 (MCCA)
AT1G03090.2	190	202	239	339	293	337	4.38313	0.123269	0.440227	methylcrotonyl-CoA carboxylase alpha chain, mitochondrial / 3-methylcrotonyl-CoA carboxylase 1 (MCCA)
AT1G03100.1	42	32	28	62	54	41	2.13908	0.119884	0.834429	Pentatricopeptide repeat (PPR) superfamily protein
AT1G03106.1	2	0	0	0	0	1	-1.07394	-1.19885	1	unknown protein
AT1G03110.1	163	174	157	340	268	311	4.43021	0.393624	0.00154282	Transducin/WD40 repeat-like superfamily protein
AT1G03120.1	1	4	3	4	4	4	-0.973328	0.0871258	1	responsive to abscisic acid 28
AT1G03130.1	8883	9488	11088	10813	10732	10667	9.9519	-0.361838	2.15e-08	photosystem I subunit D-2
AT1G03140.1	338	404	398	616	504	523	5.38752	0.0291675	0.903913	splicing factor Prp18 family protein
AT1G03150.1	157	171	173	227	203	253	4.20388	-0.0499307	0.839367	Acyl-CoA N-acyltransferases (NAT) superfamily protein
AT1G03160.1	536	573	664	843	731	814	6.08865	-0.0660805	0.566768	FZO-like
AT1G03160.2	516	534	639	814	693	774	6.0186	-0.0624453	0.612514	FZO-like
AT1G03170.1	14	12	26	17	6	9	0.975102	-1.18493	0.00580528	Protein of unknown function (DUF3049)
AT1G03180.1	29	33	36	59	66	40	2.04367	0.257097	0.436009	unknown protein
AT1G03180.2	30	33	41	65	67	48	2.12027	0.29681	0.321515	unknown protein
AT1G03190.1	125	102	123	159	165	132	3.69546	-0.115295	0.61573	RAD3-like DNA-binding helicase protein
AT1G03190.2	122	100	118	152	158	124	3.64668	-0.145054	0.498854	RAD3-like DNA-binding helicase protein
AT1G03200.1	22	27	20	26	22	18	1.01078	-0.560119	0.130706	unknown protein
AT1G03210.1	93	103	98	154	128	152	3.48071	0.0625368	0.887312	Phenazine biosynthesis PhzC/PhzF protein
AT1G03220.1	1246	1445	1303	2909	2356	2718	7.28475	0.494363	0.0367341	Eukaryotic aspartyl protease family protein
AT1G03230.1	216	285	234	644	501	550	4.95523	0.701829	1.1e-06	Eukaryotic aspartyl protease family protein
AT1G03240.1	1	3	2	7	1	4	-1.47212	0.470296	0.878309	unknown protein
AT1G03250.1	205	209	256	340	282	293	4.73007	-0.0468507	0.820991	unknown protein
AT1G03250.2	190	195	245	317	271	273	4.63696	-0.0449499	0.849662	unknown protein
AT1G03260.1	63	72	80	118	114	104	3.09684	0.147868	0.465599	SNARE associated Golgi protein family
AT1G03270.1	28	35	54	65	64	64	2.30195	0.232343	0.454711	CBS domain-containing protein with a domain of unknown function (DUF21)
AT1G03280.1	356	383	486	530	452	498	5.45759	-0.221283	0.0160656	Transcription factor TFIIE, alpha subunit
AT1G03290.1	297	288	342	287	302	290	4.71528	-0.570577	1.11e-07	unknown protein
AT1G03290.2	323	318	361	306	313	311	4.80372	-0.602639	1.06e-08	unknown protein
AT1G03300.1	43	48	43	51	58	75	2.52008	-0.0383813	1	DOMAIN OF UNKNOWN FUNCTION 724 1
AT1G03310.1	605	641	861	1163	1081	1044	6.4169	0.152847	0.15236	debranching enzyme 1
AT1G03310.2	608	648	881	1169	1090	1056	6.42757	0.145032	0.186949	debranching enzyme 1
AT1G03320.1	3	0	4	2	2	4	-1.35293	-0.288173	1	unknown protein
AT1G03330.1	203	213	273	370	339	327	4.76994	0.0944262	0.504098	Small nuclear ribonucleoprotein family protein
AT1G03340.1	22	23	17	27	23	32	1.49693	-0.0970486	0.953389	unknown protein
AT1G03350.1	405	440	445	634	615	607	5.48424	0.0282665	0.923982	BSD domain-containing protein
AT1G03360.1	110	100	140	210	184	204	4.04315	0.27747	0.0783478	ribosomal RNA processing 4
AT1G03365.1	189	196	218	301	284	279	4.46474	0.0225759	0.982234	RING/U-box superfamily protein
AT1G03370.1	284	275	275	369	309	340	4.7223	-0.213899	0.0753472	C2 calcium/lipid-binding and GRAM domain containing protein
AT1G03380.1	637	633	649	686	620	660	5.79148	-0.464857	2.46e-09	homolog of yeast autophagy 18 (ATG18) G
AT1G03390.1	0	1	0	0	2	1	-1.48576	0.907034	0.858622	HXXXD-type acyl-transferase family protein
AT1G03400.1	194	209	248	157	129	143	4.05696	-1.09693	1.03e-24	2-oxoglutarate (2OG) and Fe(II)-dependent oxygenase superfamily protein
AT1G03410.1	254	280	331	430	357	362	5.15949	-0.0864355	0.491529	2-oxoglutarate (2OG) and Fe(II)-dependent oxygenase superfamily protein
AT1G03430.1	145	142	170	165	162	170	4.08638	-0.374687	0.00133249	histidine-containing phosphotransfer factor 5
AT1G03440.1	236	268	324	251	225	243	4.69679	-0.697442	4.51e-13	Leucine-rich repeat (LRR) family protein
AT1G03445.1	0	3	1	6	5	8	-1.00806	1.67677	0.0931421	Serine/threonine protein phosphatase family protein
AT1G03457.1	78	80	75	121	125	137	3.03792	0.21966	0.294702	RNA-binding (RRM/RBD/RNP motifs) family protein
AT1G03457.2	77	78	70	115	124	132	3.0028	0.223963	0.300249	RNA-binding (RRM/RBD/RNP motifs) family protein
AT1G03470.1	21	28	24	71	60	59	2.06625	0.880533	7.75e-05	Kinase interacting (KIP1-like) family protein
AT1G03470.2	21	29	25	71	60	58	2.05882	0.834096	0.000194339	Kinase interacting (KIP1-like) family protein
AT1G03475.1	987	1138	1353	2464	2211	2300	7.34609	0.512699	1.33e-10	Coproporphyrinogen III oxidase
AT1G03490.1	0	0	0	1	0	0	-2.65756	1.71057	1	NAC domain containing protein 6
AT1G03495.1	80	101	118	186	153	203	4.02558	0.364381	0.0505532	HXXXD-type acyl-transferase family protein
AT1G03510.1	9	11	13	21	12	19	0.818897	0.156992	0.883192	Tetratricopeptide repeat (TPR)-like superfamily protein
AT1G03520.1	118	103	126	126	115	114	3.48217	-0.46366	0.000897545	Core-2/I-branching beta-1,6-N-acetylglucosaminyltransferase family protein
AT1G03520.2	88	75	86	88	89	74	3.01252	-0.485268	0.0069945	Core-2/I-branching beta-1,6-N-acetylglucosaminyltransferase family protein
AT1G03530.1	123	129	129	307	278	310	4.35817	0.733876	2.49e-09	nuclear assembly factor 1
AT1G03540.1	14	20	26	31	29	38	1.41387	0.212844	0.636705	Pentatricopeptide repeat (PPR-like) superfamily protein
AT1G03550.1	86	86	84	127	93	116	3.23621	-0.110571	0.728391	Secretory carrier membrane protein (SCAMP) family protein
AT1G03560.1	116	115	137	159	127	180	3.68784	-0.156642	0.44177	Pentatricopeptide repeat (PPR-like) superfamily protein
AT1G03580.1	7	3	2	2	2	1	-0.947017	-1.67991	0.100401	pseudogene
AT1G03590.1	206	222	290	273	249	307	4.47811	-0.284962	0.0174569	Protein phosphatase 2C family protein
AT1G03600.1	3467	3804	4396	5306	4555	4761	8.75535	-0.169028	0.0441771	photosystem II family protein
AT1G03610.1	245	293	286	240	203	232	4.59911	-0.784945	2.8e-14	Protein of unknown function (DUF789)
AT1G03620.1	12	26	16	24	16	16	0.83522	-0.444751	0.397601	ELMO/CED-12 family protein
AT1G03630.1	1840	2091	2324	3370	2816	3015	8.00392	0.0607399	0.48574	protochlorophyllide oxidoreductase C
AT1G03630.2	1746	1992	2208	3190	2668	2872	7.9313	0.0580835	0.525753	protochlorophyllide oxidoreductase C
AT1G03650.1	21	13	19	23	17	17	1.11807	-0.393637	0.41476	Acyl-CoA N-acyltransferases (NAT) superfamily protein
AT1G03660.1	8	4	8	9	10	2	-0.452773	-0.41813	0.722322	Ankyrin-repeat containing protein
AT1G03670.1	0	0	1	0	0	0	-2.57506	-2.07248	1	ankyrin repeat family protein
AT1G03680.1	1867	2053	2322	2750	2373	2649	7.92227	-0.1792	0.00295197	thioredoxin M-type 1
AT1G03687.1	84	107	125	191	166	193	3.94254	0.304045	0.0256656	DTW domain-containing protein
AT1G03687.2	76	103	115	170	156	176	3.78429	0.277394	0.0689479	DTW domain-containing protein
AT1G03700.1	11	22	13	37	26	32	0.947417	0.53942	0.405179	Uncharacterised protein family (UPF0497)
AT1G03710.1	3	2	10	7	3	9	-0.510304	-0.137911	1	Cystatin/monellin superfamily protein
AT1G03710.2	3	0	6	5	3	8	-0.768468	0.332972	0.926439	Cystatin/monellin superfamily protein
AT1G03720.1	1	0	0	0	0	0	-2.57504	-2.07886	1	Cysteine proteinases superfamily protein
AT1G03730.1	38	52	54	83	81	84	2.81619	0.288959	0.205231	unknown protein
AT1G03740.1	322	318	342	421	359	428	4.91324	-0.200447	0.0835771	Protein kinase superfamily protein
AT1G03740.2	305	304	327	404	343	418	4.8531	-0.183352	0.130441	Protein kinase superfamily protein
AT1G03750.1	84	74	66	103	101	102	2.89834	-0.0504877	0.933899	switch 2
AT1G03760.1	33	62	53	93	77	85	2.89144	0.289204	0.242602	Prefoldin chaperone subunit family protein
AT1G03770.1	71	46	68	96	94	96	2.82523	0.130493	0.723165	RING 1B
AT1G03770.2	60	39	60	91	89	90	2.69564	0.266489	0.332938	RING 1B
AT1G03770.3	64	40	62	88	86	90	2.71365	0.171483	0.596087	RING 1B
AT1G03780.1	98	79	72	232	181	207	3.53999	0.80918	4.37e-07	targeting protein for XKLP2
AT1G03780.2	139	113	115	298	235	265	3.98256	0.616895	1.91e-06	targeting protein for XKLP2
AT1G03780.3	134	107	108	284	223	247	3.9001	0.606628	9.86e-06	targeting protein for XKLP2
AT1G03790.1	2	1	4	2	2	0	-1.27502	-1.20363	0.53985	Zinc finger C-x8-C-x5-C-x3-H type family protein
AT1G03800.1	0	0	4	8	6	11	-0.870733	2.06917	0.0123796	ERF domain protein 10
AT1G03810.1	0	1	0	0	0	0	-2.71518	-2.0761	1	Nucleic acid-binding, OB-fold-like protein
AT1G03820.1	229	164	235	443	385	410	4.69579	0.479589	0.000110777	unknown protein
AT1G03830.1	94	132	112	235	189	209	4.0323	0.406451	0.0053745	guanylate-binding family protein
AT1G03830.2	98	137	114	243	201	219	4.10005	0.427299	0.00167283	guanylate-binding family protein
AT1G03840.1	35	34	31	74	75	63	1.91654	0.584212	0.0332194	C2H2 and C2HC zinc fingers superfamily protein
AT1G03840.2	33	31	29	70	67	56	1.80921	0.552858	0.0414353	C2H2 and C2HC zinc fingers superfamily protein
AT1G03850.1	70	84	72	94	95	94	2.9125	-0.173152	0.678721	Glutaredoxin family protein
AT1G03850.2	93	106	92	122	117	120	3.24928	-0.196947	0.570116	Glutaredoxin family protein
AT1G03860.1	458	499	547	961	830	935	5.95723	0.361174	2.04e-06	prohibitin 2
AT1G03860.2	427	467	511	885	775	868	5.86481	0.350924	1.07e-05	prohibitin 2
AT1G03860.3	432	469	511	889	764	856	5.85469	0.332279	1.6e-05	prohibitin 2
AT1G03870.1	606	643	639	1403	1047	1344	6.14207	0.501856	8.4e-06	FASCICLIN-like arabinoogalactan 9
AT1G03880.1	6	0	0	0	0	0	-2.52198	-4.38754	0.0924868	cruciferin 2
AT1G03900.1	552	538	653	850	741	802	5.95177	-0.0392437	0.831218	non-intrinsic ABC protein 4
AT1G03905.1	44	33	59	71	48	66	2.122	-0.0528041	1	P-loop containing nucleoside triphosphate hydrolases superfamily protein
AT1G03910.1	429	479	526	757	659	649	5.72654	0.0297837	0.876156	unknown protein
AT1G03910.2	453	509	550	792	702	698	5.82786	0.039617	0.789176	unknown protein
AT1G03920.1	51	40	48	70	55	53	2.11811	-0.144775	0.73326	Protein kinase family protein
AT1G03930.1	379	364	497	468	461	474	5.49563	-0.313651	0.000809752	dual specificity kinase 1
AT1G03940.1	80	117	106	163	159	198	3.96483	0.285366	0.123718	HXXXD-type acyl-transferase family protein
AT1G03950.1	105	114	115	127	120	130	3.49182	-0.321763	0.0381065	vacuolar protein sorting-associated protein 2.3
AT1G03960.1	90	116	117	155	133	159	3.83949	-0.0274517	1	Calcium-binding EF hand family protein
AT1G03960.2	94	115	126	157	133	156	3.8492	-0.0831517	0.70861	Calcium-binding EF hand family protein
AT1G03970.1	132	171	188	207	192	169	4.02215	-0.283393	0.0407786	G-box binding factor 4
AT1G03980.1	90	99	117	141	119	97	3.38558	-0.273527	0.100845	phytochelatin synthase 2
AT1G03982.1	0	0	0	0	1	0	-2.71524	1.71634	1	PAK-box/P21-Rho-binding family protein
AT1G03990.1	28	40	41	35	33	29	1.53225	-0.659844	0.0239994	Long-chain fatty alcohol dehydrogenase family protein
AT1G04000.1	76	78	89	108	103	96	3.32716	-0.158618	0.459485	unknown protein
AT1G04010.1	101	125	119	164	155	151	3.60871	-0.0501561	0.88474	phospholipid sterol acyl transferase 1
AT1G04020.1	119	133	172	273	217	205	4.05665	0.217122	0.107336	breast cancer associated RING 1
AT1G04020.2	120	133	166	273	222	200	4.06657	0.233993	0.0884201	breast cancer associated RING 1
AT1G04030.1	124	126	121	289	254	256	3.93082	0.606893	3.16e-06	unknown protein
AT1G04040.1	548	558	498	1498	1200	1336	6.0556	0.821614	2.63e-10	HAD superfamily, subfamily IIIB acid phosphatase
AT1G04050.1	48	51	42	83	79	58	2.62374	0.142388	0.696843	homolog of SU(var)3-9 1
AT1G04070.1	78	72	68	121	89	88	3.10223	-0.0515398	0.907387	translocase of outer membrane 22-I
AT1G04080.1	926	999	1129	1557	1245	1359	6.88289	-0.0516802	0.582233	Tetratricopeptide repeat (TPR)-like superfamily protein
AT1G04080.2	693	748	843	1170	925	1022	6.47687	-0.0494322	0.6316	Tetratricopeptide repeat (TPR)-like superfamily protein
AT1G04080.3	920	998	1117	1549	1235	1350	6.87703	-0.0522628	0.576724	Tetratricopeptide repeat (TPR)-like superfamily protein
AT1G04090.1	10	10	6	17	6	11	-0.143755	-0.115096	0.980376	Plant protein of unknown function (DUF946)
AT1G04100.1	18	55	36	45	42	44	1.93192	-0.224504	0.661918	indoleacetic acid-induced protein 10
AT1G04110.1	37	48	60	146	108	128	2.87314	0.900344	1.68e-06	Subtilase family protein
AT1G04120.1	937	1135	1189	1940	1651	1737	6.79415	0.212561	0.0344829	multidrug resistance-associated protein 5
AT1G04120.2	917	1111	1172	1895	1621	1700	6.75774	0.209554	0.0393359	multidrug resistance-associated protein 5
AT1G04130.1	96	95	91	155	173	138	3.44544	0.228075	0.209522	Tetratricopeptide repeat (TPR)-like superfamily protein
AT1G04140.1	808	876	989	1295	1126	1277	6.54421	-0.0276282	0.854932	Transducin family protein / WD-40 repeat family protein
AT1G04140.2	777	865	970	1265	1085	1253	6.49965	-0.0316893	0.82342	Transducin family protein / WD-40 repeat family protein
AT1G04150.1	5	3	6	23	14	8	-0.301592	1.16598	0.0484868	C2 calcium/lipid-binding plant phosphoribosyltransferase family protein
AT1G04160.1	142	165	199	277	265	281	4.30285	0.20754	0.0781803	myosin XI B
AT1G04170.1	896	987	1044	1959	1663	1897	6.99632	0.417091	3.17e-12	eukaryotic translation initiation factor 2 gamma subunit
AT1G04180.1	14	16	25	25	29	33	0.852487	0.178467	0.85182	YUCCA 9
AT1G04190.1	310	307	356	604	530	535	5.31336	0.28119	0.00567443	Tetratricopeptide repeat (TPR)-like superfamily protein
AT1G04200.1	222	252	263	394	312	353	4.81967	0.0250644	0.962046	unknown protein
AT1G04210.1	523	549	626	899	736	817	5.98316	0.0325418	0.839555	Leucine-rich repeat protein kinase family protein
AT1G04220.1	208	250	225	367	343	387	4.46067	0.185098	0.461463	3-ketoacyl-CoA synthase 2
AT1G04230.1	96	99	122	139	119	133	3.46748	-0.193242	0.259169	Protein of unknown function (DUF2361)
AT1G04240.1	226	207	268	239	243	282	4.92773	-0.369372	0.00300036	AUX/IAA transcriptional regulator family protein
AT1G04250.1	529	524	618	1115	1032	1129	6.08517	0.475775	1.02e-06	AUX/IAA transcriptional regulator family protein
AT1G04260.1	83	95	87	148	144	133	3.51003	0.18418	0.369299	CAMV movement protein interacting protein 7
AT1G04270.1	2272	2581	2713	5401	4500	4938	8.3984	0.473658	9.53e-19	cytosolic ribosomal protein S15
AT1G04270.2	1908	2177	2267	4507	3793	4154	8.14501	0.473328	4.79e-19	cytosolic ribosomal protein S15
AT1G04280.1	278	323	278	522	422	467	4.8048	0.178217	0.350146	P-loop containing nucleoside triphosphate hydrolases superfamily protein
AT1G04290.1	206	206	219	321	272	241	4.55381	-0.0964434	0.531353	Thioesterase superfamily protein
AT1G04300.1	546	569	640	784	776	799	5.97015	-0.0677987	0.548735	TRAF-like superfamily protein
AT1G04300.2	524	556	627	775	762	781	5.93884	-0.0528426	0.677689	TRAF-like superfamily protein
AT1G04300.3	533	560	632	778	762	786	5.95161	-0.0632485	0.584543	TRAF-like superfamily protein
AT1G04300.4	531	554	624	766	758	771	5.93225	-0.0691364	0.541464	TRAF-like superfamily protein
AT1G04310.1	60	88	60	92	59	79	2.77313	-0.360857	0.188146	ethylene response sensor 2
AT1G04330.1	13	17	12	21	15	13	0.57381	-0.275087	0.668037	unknown protein
AT1G04340.1	144	143	153	259	209	268	4.10381	0.242848	0.0927177	HR-like lesion-inducing protein-related
AT1G04350.1	683	690	842	731	667	684	6.11592	-0.583919	6.55e-16	2-oxoglutarate (2OG) and Fe(II)-dependent oxygenase superfamily protein
AT1G04360.1	38	42	33	61	68	75	2.16969	0.353561	0.277244	RING/U-box superfamily protein
AT1G04370.1	0	0	1	6	1	1	-1.99019	2.18411	0.191028	Ethylene-responsive element binding factor 14
AT1G04380.1	0	3	0	3	0	0	-1.64375	-0.447297	1	2-oxoglutarate (2OG) and Fe(II)-dependent oxygenase superfamily protein
AT1G04390.1	89	118	117	127	121	119	3.54503	-0.314676	0.0654524	BTB/POZ domain-containing protein
AT1G04400.1	1160	1206	1396	1274	1193	1324	6.85817	-0.483447	1.58e-14	cryptochrome 2
AT1G04400.2	1102	1126	1316	1208	1130	1247	6.78345	-0.478166	5.28e-14	cryptochrome 2
AT1G04410.1	4505	4846	5233	10957	9140	9600	9.22402	0.526745	2.73e-19	Lactate/malate dehydrogenase family protein
AT1G04420.1	825	939	1149	1437	1353	1448	6.72707	0.0516523	0.741116	NAD(P)-linked oxidoreductase superfamily protein
AT1G04430.1	760	994	1090	1745	1449	1638	6.82935	0.271837	0.000625301	S-adenosyl-L-methionine-dependent methyltransferases superfamily protein
AT1G04430.2	727	940	1042	1678	1398	1567	6.76927	0.28447	0.000320242	S-adenosyl-L-methionine-dependent methyltransferases superfamily protein
AT1G04440.1	461	510	555	668	595	622	5.61756	-0.191202	0.0588515	casein kinase like 13
AT1G04445.1	1	0	0	1	2	0	-2.42287	0.893484	0.842503	C2H2-like zinc finger protein
AT1G04457.1	19	14	17	35	35	49	1.18983	0.750601	0.0194564	pseudogene
AT1G04470.1	0	0	0	0	0	0	-2.62963	-5.13e-15	1	Protein of unknown function (DUF810)
AT1G04480.1	991	1122	1286	2467	2046	2226	7.31501	0.491911	1.99e-13	Ribosomal protein L14p/L23e family protein
AT1G04490.1	17	19	10	25	13	19	0.61976	-0.195683	0.759174	Protein of unknown function (DUF3527)
AT1G04490.2	17	19	10	25	13	20	0.645601	-0.170386	0.81483	Protein of unknown function (DUF3527)
AT1G04500.1	0	0	1	3	2	3	-1.85384	2.19033	0.177362	CCT motif family protein
AT1G04510.1	450	553	591	956	813	877	6.0474	0.235952	0.00855579	MOS4-associated complex 3A
AT1G04510.2	438	542	578	931	797	860	6.01574	0.237202	0.00980138	MOS4-associated complex 3A
AT1G04520.1	213	258	311	459	375	431	4.95084	0.199225	0.0548416	plasmodesmata-located protein 2
AT1G04530.1	1192	1191	1390	1224	1096	1048	6.6827	-0.660414	4.29e-18	Tetratricopeptide repeat (TPR)-like superfamily protein
AT1G04540.1	32	41	52	61	42	58	1.92719	-0.129926	0.756159	Calcium-dependent lipid-binding (CaLB domain) family protein
AT1G04550.1	263	234	266	324	314	289	4.82026	-0.216729	0.054703	AUX/IAA transcriptional regulator family protein
AT1G04550.2	308	283	334	391	364	351	5.06682	-0.239238	0.0189445	AUX/IAA transcriptional regulator family protein
AT1G04555.1	38	44	61	54	62	46	2.20417	-0.313243	0.231719	unknown protein
AT1G04560.1	2	1	1	3	0	5	-0.921538	0.450337	0.989014	AWPM-19-like family protein
AT1G04570.1	19	27	32	24	30	25	1.75701	-0.473831	0.161557	Major facilitator superfamily protein
AT1G04580.1	0	1	12	1	2	1	-1.7295	-2.02197	0.120601	aldehyde oxidase 4
AT1G04590.1	204	196	252	312	304	321	4.77794	0.0289685	0.94795	unknown protein
AT1G04590.2	186	180	230	297	289	297	4.67387	0.0726727	0.677167	unknown protein
AT1G04600.1	10	11	13	16	8	19	0.114329	-0.156951	0.92672	myosin XI A
AT1G04610.1	33	28	17	66	43	41	1.47581	0.423297	0.338643	YUCCA 3
AT1G04620.1	105	118	122	244	195	221	3.63845	0.438003	0.000340818	coenzyme F420 hydrogenase family / dehydrogenase, beta subunit family
AT1G04625.1	0	2	0	4	0	3	-1.83835	1.17605	0.546672	Polynucleotidyl transferase, ribonuclease H-like superfamily protein
AT1G04630.1	355	322	341	591	517	539	5.40144	0.193435	0.0598482	GRIM-19 protein
AT1G04635.1	26	22	21	44	27	38	1.64678	0.157783	0.839367	ribonuclease P family protein / Rpp14 family protein
AT1G04640.1	203	236	284	313	306	314	4.73949	-0.12432	0.39175	lipoyltransferase 2
AT1G04640.2	166	206	232	265	277	258	4.50475	-0.086517	0.636114	lipoyltransferase 2
AT1G04645.1	0	0	0	0	0	0	-2.22199	-5.13e-15	1	Plant self-incompatibility protein S1 family
AT1G04650.1	49	52	41	78	70	64	2.78517	0.0797035	0.918351	unknown protein
AT1G04660.1	1	5	6	5	2	2	-0.504851	-0.876637	0.408541	glycine-rich protein
AT1G04670.1	0	0	0	0	0	0	-2.62964	-5.13e-15	1	unknown protein
AT1G04680.1	703	721	820	1461	1336	1318	6.55968	0.378694	1.7e-08	Pectin lyase-like superfamily protein
AT1G04690.1	779	820	914	1230	1112	1023	6.47467	-0.0752199	0.476731	potassium channel beta subunit 1
AT1G04700.1	24	30	27	57	48	57	1.67558	0.501425	0.058559	PB1 domain-containing protein tyrosine kinase
AT1G04710.1	246	245	318	394	368	357	5.01851	-0.0266083	0.954473	peroxisomal 3-ketoacyl-CoA thiolase 4
AT1G04730.1	78	87	90	140	141	124	3.41066	0.171226	0.348302	P-loop containing nucleoside triphosphate hydrolases superfamily protein
AT1G04750.1	674	697	787	1080	924	1017	6.27507	-0.0120644	1	vesicle-associated membrane protein 721
AT1G04750.2	515	508	583	835	699	800	5.89009	0.0411689	0.773534	vesicle-associated membrane protein 721
AT1G04760.1	11	20	23	36	25	27	1.21866	0.207805	0.703332	vesicle-associated membrane protein 726
AT1G04770.1	265	309	286	430	410	478	5.14047	0.118463	0.478187	Tetratricopeptide repeat (TPR)-like superfamily protein
AT1G04778.1	2	2	2	3	3	5	-0.964359	0.361497	0.979383	unknown protein
AT1G04780.1	453	480	538	628	562	588	5.50359	-0.22266	0.0281174	Ankyrin repeat family protein
AT1G04790.1	201	241	232	311	312	302	4.66227	-0.0390833	0.866396	RING/U-box superfamily protein
AT1G04800.1	415	443	534	823	925	774	5.71919	0.370281	0.00432008	glycine-rich protein
AT1G04810.1	500	573	608	989	788	945	5.92148	0.197039	0.0526476	26S proteasome regulatory complex, non-ATPase subcomplex, Rpn2/Psmd1 subunit
AT1G04820.1	3558	3775	4004	7352	6100	6158	9.06866	0.289998	1.15e-06	tubulin alpha-4 chain
AT1G04830.1	150	160	172	170	179	222	4.0179	-0.25025	0.0756582	Ypt/Rab-GAP domain of gyp1p superfamily protein
AT1G04830.2	139	142	150	160	162	203	3.86008	-0.211324	0.156853	Ypt/Rab-GAP domain of gyp1p superfamily protein
AT1G04840.1	7	5	11	22	22	11	0.628276	0.758424	0.196735	Tetratricopeptide repeat (TPR)-like superfamily protein
AT1G04850.1	818	849	1031	1606	1352	1377	6.65445	0.188423	0.0363253	ubiquitin-associated (UBA)/TS-N domain-containing protein
AT1G04860.1	344	400	403	598	559	588	5.40996	0.109241	0.243946	ubiquitin-specific protease 2
AT1G04870.1	229	232	255	550	426	444	5.00959	0.487437	2.32e-06	protein arginine methyltransferase 10
AT1G04870.2	245	250	268	590	445	470	5.08686	0.478436	4.02e-06	protein arginine methyltransferase 10
AT1G04880.1	8	5	2	11	9	9	-0.0678622	0.43982	0.621978	HMG (high mobility group) box protein with ARID/BRIGHT DNA-binding domain
AT1G04900.1	104	100	108	203	173	209	3.79101	0.408452	0.00376991	Protein of unknown function (DUF185)
AT1G04910.1	291	281	301	408	367	406	4.91989	-0.0622019	0.672601	O-fucosyltransferase family protein
AT1G04920.1	28	30	42	40	35	36	1.57666	-0.343421	0.258741	sucrose phosphate synthase 3F
AT1G04930.1	25	25	26	50	57	62	2.08007	0.655272	0.00861021	hydroxyproline-rich glycoprotein family protein
AT1G04930.2	19	24	25	48	50	62	1.98649	0.73653	0.00382201	hydroxyproline-rich glycoprotein family protein
AT1G04940.1	393	483	526	880	704	785	6.01927	0.260572	0.00221144	translocon at the inner envelope membrane of chloroplasts 20
AT1G04945.1	47	74	55	83	88	86	3.02005	0.0506154	0.951705	HIT-type Zinc finger family protein
AT1G04945.2	50	82	59	95	100	102	3.19244	0.141051	0.575908	HIT-type Zinc finger family protein
AT1G04945.3	361	450	458	804	638	724	5.89193	0.273737	0.00136104	HIT-type Zinc finger family protein
AT1G04950.1	194	213	223	281	235	254	4.50426	-0.207534	0.0519919	TATA BOX ASSOCIATED FACTOR II 59
AT1G04950.2	195	217	224	284	240	253	4.51171	-0.20818	0.0511585	TATA BOX ASSOCIATED FACTOR II 59
AT1G04950.3	194	213	223	285	237	254	4.52127	-0.196425	0.070924	TATA BOX ASSOCIATED FACTOR II 59
AT1G04960.1	203	243	235	279	225	277	4.46357	-0.300286	0.00800594	Protein of unknown function (DUF1664)
AT1G04960.2	192	228	226	268	215	271	4.40256	-0.274698	0.0207383	Protein of unknown function (DUF1664)
AT1G04970.1	314	329	393	429	370	403	4.98527	-0.281129	0.00525335	lipid-binding serum glycoprotein family protein
AT1G04970.2	245	254	305	333	302	312	4.6628	-0.259045	0.0139938	lipid-binding serum glycoprotein family protein
AT1G04980.1	131	147	130	329	294	264	4.17419	0.620322	1.87e-06	PDI-like 2-2
AT1G04985.1	178	230	255	306	258	298	4.81128	-0.116238	0.382443	unknown protein
AT1G04990.1	119	137	143	236	247	237	3.98048	0.35767	0.0109789	Zinc finger C-x8-C-x5-C-x3-H type family protein
AT1G04990.2	114	131	135	226	231	226	3.91444	0.351184	0.0136018	Zinc finger C-x8-C-x5-C-x3-H type family protein
AT1G05000.1	106	112	95	195	128	148	3.1562	0.0760738	0.935529	Phosphotyrosine protein phosphatases superfamily protein
AT1G05000.2	96	99	89	173	127	135	3.05242	0.105879	0.862581	Phosphotyrosine protein phosphatases superfamily protein
AT1G05010.1	1594	1465	1769	2262	1937	2173	7.42722	-0.0990298	0.45159	ethylene-forming enzyme
AT1G05020.1	5	6	4	17	14	14	0.30795	1.07159	0.0666596	ENTH/ANTH/VHS superfamily protein
AT1G05030.1	111	112	122	137	117	152	3.75322	-0.261932	0.0730497	Major facilitator superfamily protein
AT1G05040.1	0	0	0	0	0	0	-2.60212	-5.13e-15	1	unknown protein
AT1G05040.2	0	0	0	0	0	0	-2.57519	-5.13e-15	1	unknown protein
AT1G05055.1	112	134	134	229	187	207	4.00413	0.216197	0.0946288	general transcription factor II H2
AT1G05060.1	129	163	127	140	148	162	4.05902	-0.394884	0.0386096	unknown protein
AT1G05061.1	3	4	1	10	9	8	-0.74484	1.22431	0.120923	pseudogene
AT1G05065.1	9	3	5	6	8	8	-0.335512	-0.123827	1	CLAVATA3/ESR-RELATED 20
AT1G05070.1	142	152	196	202	183	177	4.37593	-0.29555	0.039585	Protein of unknown function (DUF1068)
AT1G05080.1	0	0	0	0	0	0	-2.68619	-5.13e-15	1	F-box/RNI-like/FBD-like domains-containing protein
AT1G05090.1	239	273	300	317	321	338	4.81985	-0.228874	0.0250898	dentin sialophosphoprotein-related
AT1G05100.1	5	22	13	12	27	12	0.503111	-0.122931	1	mitogen-activated protein kinase kinase kinase 18
AT1G05120.1	246	301	345	393	339	327	4.86464	-0.245821	0.0472779	Helicase protein with RING/U-box domain
AT1G05135.1	17	33	33	56	57	63	2.34324	0.592093	0.0375005	pseudogene
AT1G05136.1	0	0	0	0	0	0	-2.68618	-5.13e-15	1	unknown protein
AT1G05140.1	565	714	769	808	747	810	6.17552	-0.284585	0.000767917	Peptidase M50 family protein
AT1G05150.1	420	396	481	745	587	663	5.47775	0.12206	0.254599	Calcium-binding tetratricopeptide family protein
AT1G05160.1	80	93	119	140	117	123	3.54603	-0.114589	0.625014	cytochrome P450, family 88, subfamily A, polypeptide 3
AT1G05170.1	186	240	253	351	345	339	4.7544	0.114312	0.356357	Galactosyltransferase family protein
AT1G05170.2	194	241	261	349	350	347	4.76951	0.0939858	0.464213	Galactosyltransferase family protein
AT1G05180.1	277	304	311	435	401	470	5.12172	0.0532516	0.768011	NAD(P)-binding Rossmann-fold superfamily protein
AT1G05180.2	231	274	275	387	354	402	4.94559	0.0551515	0.744068	NAD(P)-binding Rossmann-fold superfamily protein
AT1G05180.3	220	259	257	368	340	382	4.86379	0.0702592	0.636786	NAD(P)-binding Rossmann-fold superfamily protein
AT1G05190.1	2371	2630	3142	4115	3938	3853	8.31665	0.0583033	0.672279	Ribosomal protein L6 family
AT1G05200.1	353	378	480	586	497	532	5.69184	-0.07891	0.534448	glutamate receptor 3.4
AT1G05200.2	358	379	487	595	504	542	5.71109	-0.0711875	0.597064	glutamate receptor 3.4
AT1G05205.1	117	154	157	343	299	300	4.34369	0.642037	4.59e-09	unknown protein
AT1G05210.1	37	45	38	90	74	97	2.53607	0.620664	0.0069085	Transmembrane protein 97, predicted
AT1G05220.1	4	6	4	13	12	12	-0.392545	0.890382	0.151403	Transmembrane protein 97, predicted
AT1G05220.2	8	17	13	28	25	22	0.861903	0.481388	0.255805	Transmembrane protein 97, predicted
AT1G05230.1	187	169	210	263	235	270	4.44109	-0.0566075	0.841595	homeodomain GLABROUS 2
AT1G05230.2	191	178	211	266	240	276	4.47347	-0.0660103	0.776745	homeodomain GLABROUS 2
AT1G05230.3	183	165	204	253	226	258	4.39316	-0.0800947	0.733489	homeodomain GLABROUS 2
AT1G05230.4	188	176	211	267	241	275	4.47276	-0.0513613	0.859194	homeodomain GLABROUS 2
AT1G05240.1	102	103	65	394	262	330	3.59104	1.3437	9.52e-07	Peroxidase superfamily protein
AT1G05250.1	103	103	66	394	262	331	3.59267	1.33467	1.01e-06	Peroxidase superfamily protein
AT1G05260.1	322	313	255	710	652	684	5.29893	0.690731	0.000961117	Peroxidase superfamily protein
AT1G05270.1	297	288	311	405	398	389	4.9207	-0.0851974	0.546982	TraB family protein
AT1G05280.1	21	19	18	40	38	40	1.02561	0.523968	0.137625	Protein of unknown function (DUF604)
AT1G05300.1	39	44	51	95	94	112	2.47716	0.673121	0.00235522	zinc transporter 5 precursor
AT1G05300.2	37	43	43	90	83	97	2.31353	0.636902	0.00955714	zinc transporter 5 precursor
AT1G05310.1	86	76	99	98	94	94	3.0678	-0.362976	0.0891217	Pectin lyase-like superfamily protein
AT1G05320.1	308	309	320	532	484	584	5.17141	0.272961	0.0234975	unknown protein
AT1G05320.2	305	306	317	531	471	581	5.15699	0.270996	0.0241669	unknown protein
AT1G05320.3	306	307	319	532	475	591	5.16951	0.27862	0.0198646	unknown protein
AT1G05330.1	0	0	1	0	1	1	-2.04476	0.401426	1	unknown protein
AT1G05340.1	84	97	75	97	88	110	2.89484	-0.300241	0.488243	unknown protein
AT1G05350.1	245	215	245	445	383	419	4.82984	0.322097	0.0100839	NAD(P)-binding Rossmann-fold superfamily protein
AT1G05360.1	169	231	230	289	237	250	4.4299	-0.195069	0.148185	unknown protein
AT1G05370.1	12	12	16	25	34	28	0.916522	0.623059	0.0900486	Sec14p-like phosphatidylinositol transfer family protein
AT1G05380.1	381	416	465	593	492	617	5.49008	-0.065273	0.68681	Acyl-CoA N-acyltransferase with RING/FYVE/PHD-type zinc finger protein
AT1G05380.2	385	421	469	604	497	622	5.50091	-0.0626019	0.702549	Acyl-CoA N-acyltransferase with RING/FYVE/PHD-type zinc finger protein
AT1G05385.1	168	151	203	228	215	196	4.35348	-0.202577	0.248121	photosystem II 11 kDa protein-related
AT1G05400.1	6	8	3	7	7	5	-0.353104	-0.331367	0.839367	unknown protein
AT1G05400.2	5	7	3	6	7	5	-0.447713	-0.229545	0.925699	unknown protein
AT1G05410.1	130	140	159	236	200	214	4.09888	0.10279	0.539636	Protein of unknown function (DUF1423)
AT1G05410.2	119	134	146	216	192	197	4.00502	0.104187	0.547745	Protein of unknown function (DUF1423)
AT1G05420.1	7	9	5	12	8	10	0.466405	0.0154688	1	ovate family protein 12
AT1G05430.1	228	274	280	301	289	289	4.75199	-0.326713	0.000682578	unknown protein
AT1G05440.1	22	24	36	42	40	49	1.60474	0.181158	0.631241	C-8 sterol isomerases
AT1G05450.1	2	1	4	4	2	0	-1.37564	-0.679505	0.803784	Bifunctional inhibitor/lipid-transfer protein/seed storage 2S albumin superfamily protein
AT1G05450.2	6	6	6	9	4	7	-0.398733	-0.341235	0.754307	Bifunctional inhibitor/lipid-transfer protein/seed storage 2S albumin superfamily protein
AT1G05460.1	151	169	159	263	212	224	4.10403	0.0454277	0.907141	P-loop containing nucleoside triphosphate hydrolases superfamily protein
AT1G05470.1	130	135	155	231	215	194	4.10333	0.111455	0.476775	DNAse I-like superfamily protein
AT1G05490.1	18	8	21	17	12	13	0.848134	-0.653878	0.169023	chromatin remodeling 31
AT1G05500.1	417	473	490	730	649	681	5.7107	0.081217	0.454145	Calcium-dependent lipid-binding (CaLB domain) family protein
AT1G05510.1	0	0	0	0	0	0	-2.12086	-5.13e-15	1	Protein of unknown function (DUF1264)
AT1G05520.1	374	416	480	711	603	647	5.48362	0.131243	0.243907	Sec23/Sec24 protein transport family protein
AT1G05530.1	16	16	15	35	29	30	0.836626	0.496845	0.306065	UDP-glucosyl transferase 75B2
AT1G05540.1	67	63	84	103	91	109	2.88898	0.00655005	1	Protein of unknown function (DUF295)
AT1G05550.1	5	6	2	3	2	4	-1.01699	-0.996595	0.305894	Protein of unknown function (DUF295)
AT1G05550.2	4	6	2	3	2	4	-1.04458	-0.883113	0.390527	Protein of unknown function (DUF295)
AT1G05550.3	3	7	2	3	3	5	-1.02613	-0.604598	0.656725	Protein of unknown function (DUF295)
AT1G05560.1	477	852	1030	642	620	617	5.88717	-0.801453	3.84e-06	UDP-glucosyltransferase 75B1
AT1G05570.1	490	547	541	920	670	705	5.6884	0.0359959	0.925421	callose synthase 1
AT1G05570.2	478	538	533	901	660	692	5.65547	0.0366151	0.921248	callose synthase 1
AT1G05575.1	9	12	11	12	4	7	-0.149377	-0.962941	0.0922762	unknown protein
AT1G05577.1	4	1	6	10	7	9	-0.707859	0.728704	0.370157	Domain of unknown function (DUF966)
AT1G05590.1	174	145	160	241	195	236	4.25858	-0.0117052	1	beta-hexosaminidase 2
AT1G05600.1	41	79	76	95	99	83	3.00142	0.00954666	1	Tetratricopeptide repeat (TPR)-like superfamily protein
AT1G05600.2	44	81	80	97	101	88	3.04714	-0.00953807	1	Tetratricopeptide repeat (TPR)-like superfamily protein
AT1G05610.1	9	3	13	9	9	9	-0.0172314	-0.37573	0.680302	ADP-glucose pyrophosphorylase small subunit 2
AT1G05620.1	165	165	170	328	290	334	4.27855	0.42925	0.00388015	uridine-ribohydrolase 2
AT1G05620.2	151	140	153	301	262	287	4.12181	0.436647	0.00402069	uridine-ribohydrolase 2
AT1G05630.1	173	214	265	304	285	247	4.46282	-0.132997	0.381695	Endonuclease/exonuclease/phosphatase family protein
AT1G05630.2	174	216	263	307	275	249	4.45951	-0.145232	0.298076	Endonuclease/exonuclease/phosphatase family protein
AT1G05640.1	27	19	35	43	47	53	1.66385	0.327228	0.361285	Ankyrin repeat family protein
AT1G05650.1	30	14	16	90	74	89	1.94744	1.5558	2.44e-05	Pectin lyase-like superfamily protein
AT1G05660.1	59	48	42	151	113	155	2.52937	0.974984	0.00370736	Pectin lyase-like superfamily protein
AT1G05670.1	81	120	121	136	124	124	3.5472	-0.239353	0.19007	Pentatricopeptide repeat (PPR-like) superfamily protein
AT1G05670.2	80	121	118	134	122	121	3.51827	-0.252714	0.16382	Pentatricopeptide repeat (PPR-like) superfamily protein
AT1G05675.1	1	11	3	2	1	1	-1.38683	-2.28535	0.0481557	UDP-Glycosyltransferase superfamily protein
AT1G05680.1	118	373	441	149	153	147	3.75959	-1.51041	2.14e-05	Uridine diphosphate glycosyltransferase 74E2
AT1G05690.1	77	62	72	70	63	65	2.81247	-0.590292	0.00402069	BTB and TAZ domain protein 3
AT1G05700.1	30	43	35	68	30	32	1.56411	-0.246413	0.674621	Leucine-rich repeat transmembrane protein kinase protein
AT1G05710.1	72	75	74	104	106	92	2.79109	-0.0460901	0.961409	basic helix-loop-helix (bHLH) DNA-binding superfamily protein
AT1G05710.2	85	90	91	146	113	124	3.03383	0.0283126	1	basic helix-loop-helix (bHLH) DNA-binding superfamily protein
AT1G05710.3	89	93	94	144	126	123	3.09784	0.0127356	1	basic helix-loop-helix (bHLH) DNA-binding superfamily protein
AT1G05710.4	71	73	72	102	101	89	2.75097	-0.0619642	0.889029	basic helix-loop-helix (bHLH) DNA-binding superfamily protein
AT1G05710.5	82	87	81	129	118	112	2.99293	0.0245596	1	basic helix-loop-helix (bHLH) DNA-binding superfamily protein
AT1G05720.1	160	180	181	257	206	253	4.25404	-0.0400819	0.908859	selenoprotein family protein
AT1G05730.1	48	41	40	75	55	62	2.36325	0.0719211	0.950878	Eukaryotic protein of unknown function (DUF842)
AT1G05740.1	0	0	0	0	1	0	-2.57517	1.7154	1	Eukaryotic protein of unknown function (DUF842)
AT1G05750.1	62	59	80	105	100	89	3.17135	0.0531026	0.902591	Tetratricopeptide repeat (TPR)-like superfamily protein
AT1G05760.1	28	26	37	39	44	37	1.86814	-0.0950531	0.933366	Mannose-binding lectin superfamily protein
AT1G05770.1	6	20	13	15	20	16	0.500068	-0.102683	1	Mannose-binding lectin superfamily protein
AT1G05780.1	39	41	46	60	46	51	2.20608	-0.179914	0.596176	Vacuolar ATPase assembly integral membrane protein VMA21-like domain
AT1G05785.1	53	65	63	80	71	72	2.71836	-0.195221	0.394245	Got1/Sft2-like vescicle transport protein family
AT1G05785.2	48	63	56	75	61	66	2.62803	-0.222312	0.369299	Got1/Sft2-like vescicle transport protein family
AT1G05790.1	185	167	226	236	227	189	4.27472	-0.32108	0.00623649	lipase class 3 family protein
AT1G05790.2	207	186	249	273	256	219	4.44563	-0.274669	0.0219727	lipase class 3 family protein
AT1G05805.1	186	159	172	184	187	184	4.30829	-0.395921	0.00198723	basic helix-loop-helix (bHLH) DNA-binding superfamily protein
AT1G05810.1	40	32	50	84	58	69	2.27797	0.290915	0.368005	RAB GTPase homolog A5E
AT1G05820.1	18	34	33	37	26	32	1.73074	-0.334157	0.342977	SIGNAL PEPTIDE PEPTIDASE-LIKE 5
AT1G05820.2	21	33	40	44	28	36	1.8764	-0.294438	0.387295	SIGNAL PEPTIDE PEPTIDASE-LIKE 5
AT1G05830.1	401	428	496	543	486	494	5.53097	-0.294305	0.00144689	trithorax-like protein 2
AT1G05830.2	390	417	471	530	476	477	5.48386	-0.28114	0.00287401	trithorax-like protein 2
AT1G05835.1	92	105	123	170	150	126	3.97266	-0.0155085	1	PHD finger protein
AT1G05840.1	200	195	209	196	185	225	4.25959	-0.492423	1.97e-05	Eukaryotic aspartyl protease family protein
AT1G05850.1	3665	3904	4304	6146	5221	5584	8.92259	0.0157467	0.918812	Chitinase family protein
AT1G05860.1	79	76	89	119	106	99	3.18279	-0.0875536	0.752741	unknown protein
AT1G05870.1	280	318	388	414	420	408	5.25849	-0.156993	0.238653	Protein of unknown function (DUF1685)
AT1G05870.2	351	388	463	493	470	476	5.53794	-0.232464	0.040522	Protein of unknown function (DUF1685)
AT1G05870.3	325	341	412	440	425	430	5.37446	-0.228184	0.0554053	Protein of unknown function (DUF1685)
AT1G05870.4	320	350	421	448	437	432	5.39707	-0.220234	0.0607335	Protein of unknown function (DUF1685)
AT1G05880.1	4	9	12	14	9	20	0.391488	0.290466	0.775484	RING/U-box superfamily protein
AT1G05880.2	4	9	12	14	9	22	0.451839	0.355609	0.671154	RING/U-box superfamily protein
AT1G05890.1	592	632	706	685	571	685	5.97562	-0.488989	1.27e-09	RING/U-box superfamily protein
AT1G05890.2	577	602	679	659	551	667	5.92356	-0.482723	4.45e-09	RING/U-box superfamily protein
AT1G05894.1	9	5	2	6	3	7	-0.535265	-0.497199	0.642143	unknown protein
AT1G05900.1	202	205	232	215	154	171	4.31462	-0.740461	1.56e-13	endonuclease III 2
AT1G05900.2	214	211	244	226	167	178	4.387	-0.726117	1.94e-13	endonuclease III 2
AT1G05910.1	340	404	394	602	528	561	5.43828	0.0740112	0.561479	cell division cycle protein 48-related / CDC48-related
AT1G05920.1	0	0	0	0	0	0	-2.62964	-5.13e-15	1	Domain of unknown function (DUF313)
AT1G05930.1	0	0	0	0	0	0	-2.68617	-5.13e-15	1	Domain of unknown function (DUF313)
AT1G05940.1	296	420	425	546	450	484	5.42539	-0.119391	0.293467	cationic amino acid transporter 9
AT1G05950.1	56	48	63	97	85	70	2.96977	0.0964844	0.808114	unknown protein
AT1G05960.1	475	519	556	819	793	845	5.8053	0.169835	0.107479	ARM repeat superfamily protein
AT1G05960.2	461	506	551	807	778	832	5.77909	0.176725	0.0933222	ARM repeat superfamily protein
AT1G05970.1	36	42	55	63	43	53	2.37401	-0.238183	0.371243	RNA-binding (RRM/RBD/RNP motifs) family protein
AT1G05970.2	39	45	55	68	44	55	2.43426	-0.231651	0.399833	RNA-binding (RRM/RBD/RNP motifs) family protein
AT1G05990.1	0	3	0	6	4	0	-1.9545	1.15465	0.51577	EF hand calcium-binding protein family
AT1G06000.1	712	743	824	1662	1516	1727	6.69261	0.609614	4.04e-14	UDP-Glycosyltransferase superfamily protein
AT1G06010.1	68	67	92	147	135	145	3.39283	0.41655	0.011577	unknown protein
AT1G06020.1	5	4	2	6	5	6	-0.846234	0.125575	1	pfkB-like carbohydrate kinase family protein
AT1G06030.1	3	0	2	3	2	3	-1.6715	0.166231	1	pfkB-like carbohydrate kinase family protein
AT1G06040.1	2331	2446	2685	2978	2580	2668	8.02954	-0.357282	2.72e-13	B-box zinc finger family protein
AT1G06040.2	2196	2291	2531	2794	2435	2495	7.9384	-0.359446	1.01e-12	B-box zinc finger family protein
AT1G06050.1	40	47	57	65	54	55	2.3598	-0.221971	0.443403	Protein of unknown function (DUF1336)
AT1G06060.1	133	141	169	183	171	185	3.93964	-0.212532	0.108625	LisH and RanBPM domains containing protein
AT1G06070.1	153	190	184	248	200	220	4.18587	-0.155499	0.275454	Basic-leucine zipper (bZIP) transcription factor family protein
AT1G06080.1	199	142	184	189	153	126	4.07835	-0.672804	0.00500414	delta 9 desaturase 1
AT1G06090.1	133	150	120	258	195	249	3.80834	0.290034	0.443296	Fatty acid desaturase family protein
AT1G06100.1	25	24	38	45	19	39	1.67542	-0.25523	0.574137	Fatty acid desaturase family protein
AT1G06110.1	280	275	305	394	311	370	4.96718	-0.17688	0.0884623	SKP1/ASK-interacting protein 16
AT1G06120.1	39	43	40	106	85	90	2.36732	0.69919	0.0461161	Fatty acid desaturase family protein
AT1G06130.1	232	279	297	342	328	333	4.89907	-0.18353	0.0575809	glyoxalase 2-4
AT1G06130.2	225	269	293	325	313	318	4.85004	-0.214564	0.0242555	glyoxalase 2-4
AT1G06135.1	0	0	0	0	0	0	-2.71529	-5.13e-15	1	unknown protein
AT1G06140.1	12	9	3	20	15	22	0.508739	0.737511	0.178467	Pentatricopeptide repeat (PPR) superfamily protein
AT1G06148.1	0	0	1	0	1	2	-1.97262	0.896958	0.839119	unknown protein
AT1G06148.2	0	0	1	0	1	2	-1.93796	0.896577	0.838797	unknown protein
AT1G06149.1	396	403	480	562	483	485	5.51664	-0.237879	0.00402665	conserved peptide upstream open reading frame 8
AT1G06150.1	404	401	485	565	488	497	5.51868	-0.231526	0.00396372	basic helix-loop-helix (bHLH) DNA-binding superfamily protein
AT1G06150.2	396	403	480	562	483	485	5.51664	-0.237879	0.00402665	basic helix-loop-helix (bHLH) DNA-binding superfamily protein
AT1G06160.1	13	5	8	20	6	8	-0.0951241	-0.144977	1	octadecanoid-responsive Arabidopsis AP2/ERF 59
AT1G06170.1	6	5	7	8	4	12	0.0127257	-0.0820599	1	basic helix-loop-helix (bHLH) DNA-binding superfamily protein
AT1G06170.2	6	5	7	6	4	12	-0.00971754	-0.203675	0.95202	basic helix-loop-helix (bHLH) DNA-binding superfamily protein
AT1G06180.1	55	87	84	124	92	136	3.417	0.143385	0.599374	myb domain protein 13
AT1G06190.1	653	708	821	1206	1086	1121	6.50291	0.151057	0.11197	Rho termination factor
AT1G06190.2	506	573	674	967	856	904	6.18001	0.14411	0.150898	Rho termination factor
AT1G06200.1	380	408	471	546	541	540	5.6616	-0.123922	0.218879	Peptidase S24/S26A/S26B/S26C family protein
AT1G06210.1	315	339	354	491	418	478	5.17904	-0.0377402	0.864311	ENTH/VHS/GAT family protein
AT1G06210.2	289	322	334	460	399	455	5.10101	-0.0218366	0.986199	ENTH/VHS/GAT family protein
AT1G06220.1	792	804	912	1509	1273	1419	6.70847	0.246082	0.000435345	Ribosomal protein S5/Elongation factor G/III/V family protein
AT1G06220.2	787	806	900	1504	1273	1426	6.70674	0.255307	0.000225463	Ribosomal protein S5/Elongation factor G/III/V family protein
AT1G06225.1	0	0	0	0	0	0	-2.65764	-5.13e-15	1	CLAVATA3/ESR-RELATED 3
AT1G06230.1	628	599	620	835	745	845	6.06355	-0.107544	0.243004	global transcription factor group E4
AT1G06230.2	626	599	619	834	743	844	6.06244	-0.107578	0.243558	global transcription factor group E4
AT1G06230.3	595	561	593	790	704	785	5.9752	-0.118136	0.192056	global transcription factor group E4
AT1G06240.1	156	137	209	186	193	222	4.2114	-0.23165	0.118961	Protein of unknown function DUF455
AT1G06250.1	20	18	15	18	26	11	1.15931	-0.440567	0.343632	alpha/beta-Hydrolases superfamily protein
AT1G06260.1	14	6	8	12	16	22	0.53348	0.334818	0.637077	Cysteine proteinases superfamily protein
AT1G06270.1	35	57	51	81	73	75	2.62377	0.183184	0.488805	Pentatricopeptide repeat (PPR) superfamily protein
AT1G06280.1	0	0	0	0	0	0	-1.58986	-5.13e-15	1	LOB domain-containing protein 2
AT1G06290.1	664	783	791	1169	1047	1190	6.21453	0.109583	0.270421	acyl-CoA oxidase 3
AT1G06310.1	9	20	14	39	27	29	0.58053	0.640868	0.16074	acyl-CoA oxidase 6
AT1G06320.1	1	3	1	1	2	5	-1.65694	0.173017	1	unknown protein
AT1G06330.1	2	3	0	1	7	4	-1.58771	0.735117	0.710818	Heavy metal transport/detoxification superfamily protein
AT1G06340.1	0	0	0	0	0	3	-1.95538	2.97035	0.45186	Plant Tudor-like protein
AT1G06350.1	48	44	49	67	54	48	3.0427	-0.237553	0.426498	Fatty acid desaturase family protein
AT1G06360.1	362	405	457	611	632	659	5.87601	0.144857	0.280697	Fatty acid desaturase family protein
AT1G06370.1	20	30	40	32	18	33	1.8404	-0.608014	0.0645237	pseudogene
AT1G06380.1	70	73	71	123	139	128	3.44939	0.369819	0.0277623	Ribosomal protein L1p/L10e family
AT1G06390.1	437	454	513	662	546	566	5.56582	-0.160135	0.0529315	GSK3/SHAGGY-like protein kinase 1
AT1G06390.2	409	409	463	617	502	522	5.43016	-0.141116	0.120562	GSK3/SHAGGY-like protein kinase 1
AT1G06400.1	349	325	418	492	399	402	5.08059	-0.253715	0.0162943	Ras-related small GTP-binding family protein
AT1G06410.1	1179	1323	1357	1715	1518	1729	6.91528	-0.134679	0.0499805	trehalose-phosphatase/synthase 7
AT1G06420.1	24	28	35	31	46	36	1.67789	-0.110045	0.91979	unknown protein
AT1G06420.2	18	21	30	26	39	31	1.46966	-0.00848751	1	unknown protein
AT1G06430.1	1980	2185	2566	2033	1825	1968	7.51508	-0.700952	6.21e-22	FTSH protease 8
AT1G06440.1	15	12	17	34	13	26	0.866402	0.22616	0.778607	Ubiquitin carboxyl-terminal hydrolase family protein
AT1G06450.1	42	43	42	73	53	65	2.46368	0.0898047	0.878309	Polynucleotidyl transferase, ribonuclease H-like superfamily protein
AT1G06460.1	403	463	545	458	442	480	6.05688	-0.524533	5.55e-11	alpha-crystallin domain 32.1
AT1G06470.1	190	185	210	304	280	283	4.63191	0.070761	0.6848	Nucleotide/sugar transporter family protein
AT1G06470.2	202	204	229	333	318	302	4.75982	0.0895709	0.550733	Nucleotide/sugar transporter family protein
AT1G06475.1	13	15	20	28	36	40	0.928193	0.619503	0.0686784	unknown protein
AT1G06490.1	107	147	117	221	144	186	3.65759	0.0657727	0.878174	glucan synthase-like 7
AT1G06500.1	63	66	70	81	90	113	3.09002	0.0187727	1	unknown protein
AT1G06500.2	56	54	68	77	79	103	2.98716	0.0467348	0.981069	unknown protein
AT1G06500.3	63	66	71	90	88	112	3.14205	0.0402335	1	unknown protein
AT1G06500.4	51	53	58	73	70	89	2.82439	0.0219767	1	unknown protein
AT1G06510.1	158	137	197	213	204	249	4.28504	-0.0565705	0.852172	unknown protein
AT1G06515.1	90	84	96	131	124	129	3.48018	0.0114611	1	Protein of unknown function (DUF3317)
AT1G06515.2	103	104	117	160	154	151	3.71306	0.0250662	1	Protein of unknown function (DUF3317)
AT1G06520.1	10	11	11	9	10	11	0.288183	-0.581629	0.382276	glycerol-3-phosphate acyltransferase 1
AT1G06530.1	406	436	517	837	745	813	5.85373	0.322425	1.32e-05	Tropomyosin-related
AT1G06540.1	4	3	2	7	10	6	-0.602368	0.835319	0.356127	unknown protein
AT1G06550.1	682	724	735	1216	1056	1136	6.43751	0.170944	0.062117	ATP-dependent caseinolytic (Clp) protease/crotonase family protein
AT1G06560.1	99	106	123	224	200	187	4.00796	0.400838	0.000871943	NOL1/NOP2/sun family protein
AT1G06570.1	617	819	931	673	642	616	5.94859	-0.781752	4.25e-20	phytoene desaturation 1
AT1G06570.2	574	747	843	616	600	567	5.82943	-0.768002	2.84e-19	phytoene desaturation 1
AT1G06580.1	16	22	18	28	30	32	1.48552	0.187529	0.747626	Pentatricopeptide repeat (PPR) superfamily protein
AT1G06590.1	102	151	120	190	157	174	3.86873	-0.016537	1	unknown protein
AT1G06620.1	86	98	78	198	176	209	3.3216	0.651195	0.000626791	2-oxoglutarate (2OG) and Fe(II)-dependent oxygenase superfamily protein
AT1G06630.1	107	131	103	155	136	137	3.6483	-0.172095	0.363832	F-box/RNI-like superfamily protein
AT1G06630.2	91	121	96	147	132	130	3.52221	-0.0893107	0.750873	F-box/RNI-like superfamily protein
AT1G06630.3	93	118	92	142	127	127	3.50555	-0.113413	0.656313	F-box/RNI-like superfamily protein
AT1G06640.1	913	947	926	1389	1198	1274	6.59937	-0.0314984	0.880302	2-oxoglutarate (2OG) and Fe(II)-dependent oxygenase superfamily protein
AT1G06640.2	864	877	863	1312	1123	1185	6.49613	-0.0276168	0.912156	2-oxoglutarate (2OG) and Fe(II)-dependent oxygenase superfamily protein
AT1G06640.3	833	849	844	1273	1100	1148	6.45327	-0.0229404	0.94354	2-oxoglutarate (2OG) and Fe(II)-dependent oxygenase superfamily protein
AT1G06645.1	78	97	137	76	68	86	3.18321	-0.928429	3.95e-08	2-oxoglutarate (2OG) and Fe(II)-dependent oxygenase superfamily protein
AT1G06650.1	401	470	560	449	406	452	5.44017	-0.623558	2.77e-15	2-oxoglutarate (2OG) and Fe(II)-dependent oxygenase superfamily protein
AT1G06650.2	464	528	615	519	462	514	5.61101	-0.598238	1.05e-15	2-oxoglutarate (2OG) and Fe(II)-dependent oxygenase superfamily protein
AT1G06660.1	36	36	26	66	61	53	2.01483	0.374905	0.211323	unknown protein
AT1G06670.1	589	651	712	1236	1070	1157	6.36309	0.330506	4.35e-05	nuclear DEIH-boxhelicase
AT1G06680.1	28213	30007	34353	37674	33426	34942	11.7112	-0.299212	8.2e-08	photosystem II subunit P-1
AT1G06680.2	25843	27329	31396	34461	30596	31877	11.5828	-0.298351	1.61e-07	photosystem II subunit P-1
AT1G06690.1	548	585	701	768	706	763	6.2533	-0.206997	0.0184249	NAD(P)-linked oxidoreductase superfamily protein
AT1G06700.1	511	571	543	772	679	694	5.9231	-0.0986813	0.316798	Protein kinase superfamily protein
AT1G06700.2	512	559	533	771	668	674	5.90781	-0.102417	0.307286	Protein kinase superfamily protein
AT1G06710.1	57	75	61	121	87	94	3.06143	0.145437	0.601021	Tetratricopeptide repeat (TPR)-like superfamily protein
AT1G06720.1	346	443	429	901	712	782	5.84524	0.476792	4.19e-07	P-loop containing nucleoside triphosphate hydrolases superfamily protein
AT1G06730.1	115	132	141	228	211	202	4.03847	0.228153	0.093776	pfkB-like carbohydrate kinase family protein
AT1G06750.1	7	8	15	19	12	15	0.656245	0.120185	0.929443	P-loop containing nucleoside triphosphate hydrolases superfamily protein
AT1G06750.2	3	1	1	3	2	3	-1.41137	0.168878	1	P-loop containing nucleoside triphosphate hydrolases superfamily protein
AT1G06760.1	1725	1800	1807	2853	2309	2455	7.61078	0.011014	1	winged-helix DNA-binding transcription factor family protein
AT1G06770.1	63	92	92	100	98	87	3.10221	-0.286338	0.182144	DREB2A-interacting protein 1
AT1G06770.2	65	84	95	98	103	87	3.07685	-0.252831	0.229637	DREB2A-interacting protein 1
AT1G06780.1	195	198	174	298	290	280	4.224	0.112408	0.646731	galacturonosyltransferase 6
AT1G06780.2	196	202	174	300	292	285	4.22344	0.114479	0.631525	galacturonosyltransferase 6
AT1G06790.1	82	94	59	139	135	136	3.49255	0.301788	0.103487	RNA polymerase Rpb7 N-terminal domain-containing protein
AT1G06790.2	94	107	72	168	145	155	3.65919	0.275189	0.12282	RNA polymerase Rpb7 N-terminal domain-containing protein
AT1G06800.1	87	105	103	163	144	145	3.50497	0.118719	0.584065	alpha/beta-Hydrolases superfamily protein
AT1G06800.2	73	87	85	129	122	114	3.18614	0.0786929	0.798661	alpha/beta-Hydrolases superfamily protein
AT1G06810.1	0	0	0	0	1	0	-2.42331	1.71463	1	unknown protein
AT1G06820.1	369	420	461	609	513	581	5.58446	-0.0501979	0.720138	carotenoid isomerase
AT1G06830.1	28	25	38	93	90	91	2.21749	1.09552	1.64e-05	Glutaredoxin family protein
AT1G06840.1	263	267	219	334	259	286	4.57205	-0.277266	0.0545132	Leucine-rich repeat protein kinase family protein
AT1G06850.1	42	61	48	111	79	108	2.72385	0.479868	0.0263709	basic leucine-zipper 52
AT1G06850.2	37	48	34	88	54	78	2.3318	0.381051	0.170744	basic leucine-zipper 52
AT1G06870.1	190	211	209	372	331	351	4.52591	0.291185	0.0116848	Peptidase S24/S26A/S26B/S26C family protein
AT1G06890.1	316	311	344	626	498	582	5.24971	0.31213	0.00823421	nodulin MtN21 /EamA-like transporter family protein
AT1G06890.2	282	275	307	542	449	527	5.09889	0.313223	0.0102115	nodulin MtN21 /EamA-like transporter family protein
AT1G06890.3	306	291	326	600	476	537	5.17295	0.303711	0.0137061	nodulin MtN21 /EamA-like transporter family protein
AT1G06900.1	453	489	498	875	835	865	5.80986	0.341867	4.27e-06	Insulinase (Peptidase family M16) family protein
AT1G06910.1	52	63	75	66	74	94	2.87114	-0.191392	0.481351	TRF-like 7
AT1G06920.1	0	0	0	0	0	0	-2.5227	-5.13e-15	1	ovate family protein 4
AT1G06923.1	5	6	4	21	9	14	-0.735949	1.03091	0.121521	unknown protein
AT1G06925.1	1	0	0	0	1	0	-2.68598	-0.363274	1	unknown protein
AT1G06930.1	5	5	4	17	11	11	-0.586527	0.963677	0.110699	unknown protein
AT1G06950.1	1464	1596	1718	3544	2929	3070	7.74574	0.499051	7.46e-12	translocon at the inner envelope membrane of chloroplasts 110
AT1G06960.1	124	128	131	151	144	144	3.86468	-0.300061	0.0455605	RNA-binding (RRM/RBD/RNP motifs) family protein
AT1G06960.2	120	126	124	138	129	130	3.75672	-0.395716	0.00678232	RNA-binding (RRM/RBD/RNP motifs) family protein
AT1G06960.3	112	113	116	140	119	125	3.71777	-0.326825	0.0364476	RNA-binding (RRM/RBD/RNP motifs) family protein
AT1G06970.1	2	0	1	2	2	1	-1.87048	0.218041	1	cation/hydrogen exchanger 14
AT1G06980.1	28	15	17	51	31	41	2.60454	0.533277	0.0895806	unknown protein
AT1G06990.1	0	0	0	0	0	0	-2.60216	-5.13e-15	1	GDSL-like Lipase/Acylhydrolase superfamily protein
AT1G07000.1	94	94	97	148	112	112	3.18769	-0.119827	0.772946	exocyst subunit exo70 family protein B2
AT1G07010.1	893	949	1119	1052	956	1005	6.54875	-0.468848	6.38e-10	Calcineurin-like metallo-phosphoesterase superfamily protein
AT1G07010.2	856	912	1079	1006	901	959	6.48764	-0.484529	1.99e-10	Calcineurin-like metallo-phosphoesterase superfamily protein
AT1G07010.3	814	868	1040	975	869	920	6.42431	-0.471751	8.28e-10	Calcineurin-like metallo-phosphoesterase superfamily protein
AT1G07020.1	72	73	91	115	96	115	3.12866	-0.0298843	1	unknown protein
AT1G07025.1	0	0	0	0	0	0	-2.71531	-5.13e-15	1	Mitochondrial substrate carrier family protein
AT1G07030.1	170	240	228	384	313	321	4.7014	0.177524	0.201234	Mitochondrial substrate carrier family protein
AT1G07040.1	137	167	186	229	192	177	3.93739	-0.2076	0.225619	unknown protein
AT1G07050.1	6	5	8	9	5	16	0.0667318	0.159581	1	CCT motif family protein
AT1G07060.1	0	2	1	1	0	0	-2.06307	-1.69913	0.839555	unknown protein
AT1G07070.1	123	145	173	386	322	335	4.53352	0.746389	9.35e-11	Ribosomal protein L35Ae family protein
AT1G07080.1	634	627	821	923	855	900	6.16051	-0.129826	0.127896	Thioredoxin superfamily protein
AT1G07090.1	63	67	58	143	107	121	2.91889	0.476831	0.0206649	Protein of unknown function (DUF640)
AT1G07110.1	1399	1436	1651	1789	1611	1774	7.31108	-0.290058	5.42e-05	fructose-2,6-bisphosphatase
AT1G07120.1	15	16	13	12	13	7	0.714113	-0.94772	0.0334385	unknown protein
AT1G07130.1	53	48	63	69	60	78	2.54391	-0.160001	0.569759	Nucleic acid-binding, OB-fold-like protein
AT1G07135.1	6	14	16	14	5	12	0.629426	-0.703406	0.167059	glycine-rich protein
AT1G07140.1	996	1094	1211	2216	1967	1923	7.06711	0.391484	1.06e-08	Pleckstrin homology (PH) domain superfamily protein
AT1G07150.1	25	36	35	29	19	27	1.74303	-0.849162	0.00220281	mitogen-activated protein kinase kinase kinase 13
AT1G07150.2	25	36	35	29	19	27	1.74303	-0.849162	0.00220281	mitogen-activated protein kinase kinase kinase 13
AT1G07160.1	3	3	2	4	3	3	-1.61506	-0.169154	0.988934	Protein phosphatase 2C family protein
AT1G07170.1	67	80	101	141	129	115	3.30771	0.141536	0.577157	PHF5-like protein
AT1G07170.2	42	62	72	99	102	85	2.89121	0.20969	0.394245	PHF5-like protein
AT1G07170.3	54	75	89	118	119	103	3.17575	0.150652	0.567816	PHF5-like protein
AT1G07175.1	2	2	2	4	2	5	-1.29623	0.357299	0.99215	unknown protein
AT1G07180.1	1341	1393	1570	1539	1433	1486	7.02867	-0.444756	9.85e-10	alternative NAD(P)H dehydrogenase 1
AT1G07200.1	125	182	173	248	216	233	3.90404	0.0425075	0.869873	Double Clp-N motif-containing P-loop nucleoside triphosphate hydrolases superfamily protein
AT1G07200.2	216	264	255	379	306	339	4.49729	-0.019014	0.985191	Double Clp-N motif-containing P-loop nucleoside triphosphate hydrolases superfamily protein
AT1G07210.1	277	309	332	570	470	465	5.21758	0.215531	0.0226696	Ribosomal protein S18
AT1G07220.1	119	97	128	178	139	171	3.59749	0.00633032	1	Arabidopsis thaliana protein of unknown function (DUF821)
AT1G07230.1	255	271	306	329	284	296	4.77853	-0.368757	0.000160144	non-specific phospholipase C1
AT1G07240.1	144	165	160	220	174	195	4.25123	-0.170603	0.308818	UDP-glucosyl transferase 71C5
AT1G07250.1	347	400	382	452	425	451	5.36274	-0.262749	0.00198231	UDP-glucosyl transferase 71C4
AT1G07260.1	64	68	86	123	88	119	2.718	0.100841	0.808343	UDP-glucosyl transferase 71C3
AT1G07270.1	18	22	16	26	18	30	1.04005	-0.0958908	0.926694	Cell division control, Cdc6
AT1G07280.1	527	559	576	749	683	655	6.06113	-0.169593	0.0839309	Tetratricopeptide repeat (TPR)-like superfamily protein
AT1G07280.2	501	533	551	714	648	617	6.0069	-0.177765	0.0748117	Tetratricopeptide repeat (TPR)-like superfamily protein
AT1G07280.3	509	538	556	718	655	621	6.01804	-0.183251	0.0682504	Tetratricopeptide repeat (TPR)-like superfamily protein
AT1G07290.1	12	17	16	27	25	24	1.16967	0.258921	0.696557	golgi nucleotide sugar transporter 2
AT1G07300.1	41	42	33	55	46	49	2.29779	-0.128963	0.76509	josephin protein-related
AT1G07310.1	192	195	213	302	258	273	4.58017	-0.0243339	0.968527	Calcium-dependent lipid-binding (CaLB domain) family protein
AT1G07320.1	2460	2701	3196	5092	4686	4711	8.53286	0.302205	0.000311623	ribosomal protein L4
AT1G07320.2	2245	2446	2924	4639	4270	4300	8.38755	0.303044	0.000406623	ribosomal protein L4
AT1G07320.3	1898	2062	2475	3942	3635	3668	8.13634	0.31374	0.000203451	ribosomal protein L4
AT1G07320.4	2248	2448	2930	4638	4265	4307	8.38772	0.301075	0.000424684	ribosomal protein L4
AT1G07330.1	0	1	1	0	2	4	-1.4975	0.984511	0.685125	unknown protein
AT1G07340.1	0	0	0	0	0	0	-2.71529	-5.13e-15	1	sugar transporter 2
AT1G07350.1	276	302	362	390	411	386	5.09717	-0.15483	0.204591	RNA-binding (RRM/RBD/RNP motifs) family protein
AT1G07350.2	282	313	385	397	422	403	5.15634	-0.171629	0.157555	RNA-binding (RRM/RBD/RNP motifs) family protein
AT1G07360.1	361	411	456	623	607	625	5.62888	0.101142	0.310823	CCCH-type zinc fingerfamily protein with RNA-binding domain
AT1G07370.1	197	217	214	453	363	379	4.85138	0.429448	2.69e-06	proliferating cellular nuclear antigen 1
AT1G07380.1	137	161	161	233	230	214	3.89874	0.0652689	0.791865	Neutral/alkaline non-lysosomal ceramidase
AT1G07390.1	40	47	39	76	60	60	2.32732	0.138075	0.70664	receptor like protein 1
AT1G07390.2	39	43	34	72	56	57	2.24769	0.17399	0.612104	receptor like protein 1
AT1G07390.3	39	45	37	75	59	60	2.2983	0.181209	0.613725	receptor like protein 1
AT1G07400.1	8	46	33	25	17	21	1.06064	-0.946811	0.0268896	HSP20-like chaperones superfamily protein
AT1G07410.1	23	21	21	31	31	40	1.25371	0.151895	0.839831	RAB GTPase homolog A2B
AT1G07420.1	158	184	192	290	264	276	4.7395	0.140055	0.266999	sterol 4-alpha-methyl-oxidase 2-1
AT1G07420.2	153	176	185	272	258	270	4.69903	0.142357	0.274891	sterol 4-alpha-methyl-oxidase 2-1
AT1G07430.1	46	47	49	11	19	15	2.03391	-2.14095	5.67e-12	highly ABA-induced PP2C gene 2
AT1G07440.1	387	401	497	483	481	467	5.70412	-0.337218	0.000201468	NAD(P)-binding Rossmann-fold superfamily protein
AT1G07440.2	346	362	456	427	430	434	5.55382	-0.342351	0.00031288	NAD(P)-binding Rossmann-fold superfamily protein
AT1G07450.1	50	60	66	65	47	51	2.63738	-0.606311	0.00279788	NAD(P)-binding Rossmann-fold superfamily protein
AT1G07460.1	0	0	1	1	1	1	-2.28559	0.899756	0.843911	Concanavalin A-like lectin family protein
AT1G07470.1	419	373	456	482	464	470	5.38459	-0.314245	0.000259354	Transcription factor IIA, alpha/beta subunit
AT1G07473.1	1	2	2	1	0	2	-1.87089	-1.12346	0.522924	unknown protein
AT1G07476.1	0	0	0	0	0	0	-2.62964	-5.13e-15	1	unknown protein
AT1G07480.1	426	390	452	464	453	461	5.39274	-0.376811	8.34e-06	Transcription factor IIA, alpha/beta subunit
AT1G07480.2	419	384	445	451	440	452	5.36725	-0.390975	4.08e-06	Transcription factor IIA, alpha/beta subunit
AT1G07485.1	29	26	33	34	24	29	1.47339	-0.511567	0.086073	unknown protein
AT1G07490.1	34	30	44	42	31	36	1.73974	-0.481607	0.0819081	ROTUNDIFOLIA like 3
AT1G07500.1	1	1	4	5	5	3	-1.45931	0.596768	0.720865	unknown protein
AT1G07510.1	404	477	456	679	625	678	5.64513	0.0707634	0.638825	FTSH protease 10
AT1G07520.1	113	114	118	152	133	171	3.33817	-0.0966085	0.750145	GRAS family transcription factor
AT1G07530.1	368	380	435	428	387	418	5.18178	-0.436311	9.75e-08	SCARECROW-like 14
AT1G07540.1	1	0	0	0	0	0	-2.44747	-2.07742	1	TRF-like 2
AT1G07550.1	4	4	8	6	7	7	-0.651056	-0.165275	1	Leucine-rich repeat protein kinase family protein
AT1G07560.1	54	55	43	62	57	46	2.13573	-0.388278	0.373792	Leucine-rich repeat protein kinase family protein
AT1G07570.1	147	174	177	181	151	151	4.06488	-0.540914	1.69e-05	Protein kinase superfamily protein
AT1G07570.2	145	168	174	180	151	150	4.03979	-0.514636	4.45e-05	Protein kinase superfamily protein
AT1G07570.3	130	146	157	164	137	135	3.89562	-0.48669	0.000408944	Protein kinase superfamily protein
AT1G07590.1	13620	13451	14136	16317	15735	16335	10.3355	-0.267553	0.0401643	Tetratricopeptide repeat (TPR)-like superfamily protein
AT1G07600.1	2580	2564	2840	3046	2759	2907	7.92125	-0.372681	0.000995877	metallothionein 1A
AT1G07610.1	1759	1695	1677	2367	2327	2251	7.36272	-0.0654364	0.872211	metallothionein 1C
AT1G07615.1	63	60	61	104	108	98	3.19725	0.255319	0.257083	GTP-binding protein Obg/CgtA
AT1G07620.1	32	41	30	39	27	24	1.36783	-0.701005	0.122586	GTP-binding protein Obg/CgtA
AT1G07630.1	182	177	161	276	254	264	4.19091	0.109117	0.576939	pol-like 5
AT1G07640.1	328	344	419	438	461	457	5.37576	-0.177828	0.112626	Dof-type zinc finger DNA-binding family protein
AT1G07640.2	321	337	406	424	450	445	5.34129	-0.181722	0.106248	Dof-type zinc finger DNA-binding family protein
AT1G07640.3	322	336	410	429	451	443	5.3412	-0.182765	0.102908	Dof-type zinc finger DNA-binding family protein
AT1G07645.1	0	1	1	0	0	0	-2.16005	-2.88515	0.739151	dessication-induced 1VOC superfamily protein
AT1G07650.1	300	321	322	451	399	410	5.35731	-0.0797315	0.496442	Leucine-rich repeat transmembrane protein kinase
AT1G07650.2	283	308	299	438	384	384	5.29635	-0.059799	0.66084	Leucine-rich repeat transmembrane protein kinase
AT1G07660.1	339	364	432	537	525	509	5.60109	-0.024292	0.96211	Histone superfamily protein
AT1G07660.2	216	225	242	309	324	296	4.876	-0.0512504	0.811332	Histone superfamily protein
AT1G07670.1	745	818	832	1450	1245	1384	6.41054	0.268857	0.00578522	endomembrane-type CA-ATPase 4
AT1G07690.1	0	0	0	0	0	1	-2.54867	1.71319	1	unknown protein
AT1G07700.1	620	644	763	783	758	699	6.05703	-0.349203	4.68e-05	Thioredoxin superfamily protein
AT1G07700.2	536	549	654	680	656	594	5.82525	-0.343569	5.22e-05	Thioredoxin superfamily protein
AT1G07700.3	540	561	680	689	688	610	5.88328	-0.334097	0.000301881	Thioredoxin superfamily protein
AT1G07705.1	225	221	244	355	307	353	4.75547	0.0593748	0.710526	NOT2 / NOT3 / NOT5 family
AT1G07705.2	234	233	253	361	319	358	4.79971	0.0305633	0.921515	NOT2 / NOT3 / NOT5 family
AT1G07710.1	10	11	8	13	14	9	0.0328402	-0.183593	0.916186	Ankyrin repeat family protein
AT1G07720.1	258	306	384	349	310	354	4.91331	-0.393959	0.00320667	3-ketoacyl-CoA synthase 3
AT1G07725.1	100	115	105	128	140	134	3.56408	-0.166643	0.395099	exocyst subunit exo70 family protein H6
AT1G07730.2	22	41	44	77	62	60	2.0842	0.403732	0.242993	Disease resistance-responsive (dirigent-like protein) family protein
AT1G07740.1	53	79	70	130	89	111	2.93644	0.207853	0.475089	Tetratricopeptide repeat (TPR)-like superfamily protein
AT1G07745.1	34	41	56	43	50	36	2.34687	-0.510901	0.0617076	homolog of RAD51 D
AT1G07745.2	32	43	58	44	50	35	2.39717	-0.53219	0.0484132	homolog of RAD51 D
AT1G07750.1	277	241	272	442	399	430	4.87797	0.185814	0.178012	RmlC-like cupins superfamily protein
AT1G07770.1	1759	1870	1997	3537	3070	3301	7.8953	0.318089	2.8e-08	ribosomal protein S15A
AT1G07770.2	1636	1770	1910	3361	2921	3103	7.82063	0.322511	2.21e-08	ribosomal protein S15A
AT1G07780.1	158	218	204	353	358	330	4.83867	0.349626	0.000965004	phosphoribosylanthranilate isomerase 1
AT1G07780.2	158	218	198	348	356	326	4.81741	0.349085	0.00123906	phosphoribosylanthranilate isomerase 1
AT1G07780.3	172	228	215	395	408	391	4.94626	0.462879	1.88e-06	phosphoribosylanthranilate isomerase 1
AT1G07780.4	168	219	201	376	392	375	4.88047	0.464306	3.74e-06	phosphoribosylanthranilate isomerase 1
AT1G07780.5	158	219	201	349	354	325	4.82256	0.336247	0.00163662	phosphoribosylanthranilate isomerase 1
AT1G07790.1	429	479	484	875	754	796	6.0475	0.302634	0.000126672	Histone superfamily protein
AT1G07795.1	5	3	3	10	8	10	-0.980265	0.825162	0.438949	unknown protein
AT1G07810.1	689	740	765	1266	1048	1195	6.23805	0.177274	0.0849682	ER-type Ca2+-ATPase 1
AT1G07820.1	619	635	753	1043	946	968	6.46381	0.0639169	0.557057	Histone superfamily protein
AT1G07820.2	597	616	737	1014	912	921	6.41953	0.0509517	0.679031	Histone superfamily protein
AT1G07830.1	153	158	150	315	251	243	4.42553	0.311807	0.00743182	ribosomal protein L29 family protein
AT1G07840.1	180	170	196	322	260	300	4.56936	0.193649	0.104191	Sas10/Utp3/C1D family
AT1G07840.2	160	156	176	292	242	274	4.45545	0.217909	0.0701562	Sas10/Utp3/C1D family
AT1G07840.3	168	148	183	308	237	283	4.45421	0.231538	0.069776	Sas10/Utp3/C1D family
AT1G07850.1	0	1	0	1	0	1	-2.28574	0.39748	1	Protein of unknown function (DUF604)
AT1G07860.1	0	0	0	0	0	0	-2.54881	-5.13e-15	1	unknown protein
AT1G07870.1	98	119	122	192	147	177	3.60777	0.107784	0.681729	Protein kinase superfamily protein
AT1G07870.2	87	115	106	170	142	166	3.46495	0.136574	0.575183	Protein kinase superfamily protein
AT1G07880.1	39	40	36	60	45	56	2.01296	-0.0142332	1	Protein kinase superfamily protein
AT1G07880.2	41	37	33	62	39	54	1.99044	-0.0211026	1	Protein kinase superfamily protein
AT1G07890.1	5946	6875	7106	10725	9140	9088	9.45918	0.0411543	0.771993	ascorbate peroxidase 1
AT1G07890.2	5593	6512	6709	10140	8566	8531	9.38119	0.0357688	0.821379	ascorbate peroxidase 1
AT1G07890.3	5573	6483	6683	10109	8550	8508	9.37654	0.0378476	0.803763	ascorbate peroxidase 1
AT1G07890.4	5590	6506	6703	10135	8562	8531	9.38044	0.0364316	0.815581	ascorbate peroxidase 1
AT1G07890.5	5574	6484	6688	10113	8555	8509	9.37722	0.0378687	0.803717	ascorbate peroxidase 1
AT1G07890.6	5542	6426	6614	9967	8417	8398	9.3408	0.0291661	0.878309	ascorbate peroxidase 1
AT1G07890.7	5576	6483	6684	10111	8554	8510	9.377	0.037959	0.802649	ascorbate peroxidase 1
AT1G07890.8	5589	6509	6705	10141	8565	8533	9.38088	0.0367161	0.81325	ascorbate peroxidase 1
AT1G07900.1	1	2	5	5	1	1	-1.64308	-0.654801	0.839846	LOB domain-containing protein 1
AT1G07901.1	4	4	4	4	2	3	-1.01675	-0.880869	0.378658	unknown protein
AT1G07910.1	190	185	246	314	254	295	4.55655	-0.021166	1	RNAligase
AT1G07910.2	196	189	249	329	263	312	4.60732	0.0154475	1	RNAligase
AT1G07920.1	9792	10620	11317	25413	20019	22131	10.5195	0.589219	3.25e-30	GTP binding Elongation factor Tu family protein
AT1G07930.1	8703	9537	10170	22857	17834	19810	10.3541	0.589486	4.58e-30	GTP binding Elongation factor Tu family protein
AT1G07930.2	6672	7345	7796	17431	13464	15177	9.95853	0.57736	9.47e-27	GTP binding Elongation factor Tu family protein
AT1G07940.1	9618	10355	11020	24812	19313	21418	10.4692	0.578575	3.94e-28	GTP binding Elongation factor Tu family protein
AT1G07940.2	9509	10246	10893	24547	19141	21130	10.455	0.578711	3.81e-28	GTP binding Elongation factor Tu family protein
AT1G07950.1	118	124	122	189	154	151	3.78468	-0.0578244	0.817855	Surfeit locus protein 5 subunit 22 of Mediator complex
AT1G07960.1	229	209	259	311	269	293	4.60307	-0.172049	0.118087	PDI-like 5-1
AT1G07960.2	241	221	273	324	281	305	4.66435	-0.188732	0.0694491	PDI-like 5-1
AT1G07960.3	246	213	266	327	288	313	4.66273	-0.141201	0.232495	PDI-like 5-1
AT1G07970.1	116	139	157	202	186	203	4.02695	0.02522	0.989014	unknown protein
AT1G07980.1	113	138	159	220	188	190	4.00965	0.049928	0.877872	nuclear factor Y, subunit C10
AT1G07985.1	16	20	17	29	27	28	0.938841	0.165315	0.87682	Expressed protein
AT1G07990.1	508	522	537	718	631	672	5.75978	-0.131993	0.154507	SIT4 phosphatase-associated family protein
AT1G08000.1	67	67	84	138	116	122	3.26856	0.289605	0.103423	GATA transcription factor 10
AT1G08000.2	58	54	79	126	101	105	3.12625	0.301184	0.129115	GATA transcription factor 10
AT1G08005.1	0	0	0	1	1	0	-2.49719	2.4743	0.726644	unknown protein
AT1G08010.1	122	119	145	218	181	204	4.01668	0.146641	0.32509	GATA transcription factor 11
AT1G08010.2	87	87	102	159	128	144	3.52224	0.145741	0.451499	GATA transcription factor 11
AT1G08030.1	216	235	276	313	271	303	4.67392	-0.208456	0.0717637	tyrosylprotein sulfotransferase
AT1G08035.1	0	3	1	2	0	2	-1.48499	-0.455403	0.921114	unknown protein
AT1G08040.1	195	225	239	293	304	282	4.66439	-0.0788295	0.620398	Protein of unknown function (DUF707)
AT1G08040.2	183	228	234	288	300	275	4.64322	-0.073481	0.686831	Protein of unknown function (DUF707)
AT1G08050.1	52	48	57	109	66	80	2.52054	0.194276	0.61876	Zinc finger (C3HC4-type RING finger) family protein
AT1G08060.1	272	328	329	411	334	334	4.9106	-0.281778	0.00533869	ATP-dependent helicase family protein
AT1G08060.2	265	322	322	391	320	324	4.86625	-0.310146	0.00158386	ATP-dependent helicase family protein
AT1G08065.1	0	0	0	0	0	0	-2.28601	-5.13e-15	1	alpha carbonic anhydrase 5
AT1G08070.1	10	10	11	20	12	21	0.676689	0.272484	0.702216	Tetratricopeptide repeat (TPR)-like superfamily protein
AT1G08080.1	3	1	0	0	1	2	-1.40003	-0.828852	0.925768	alpha carbonic anhydrase 7
AT1G08090.1	23	44	44	313	302	228	2.90874	2.44116	1.71e-05	nitrate transporter 2:1
AT1G08100.1	2	3	2	29	28	26	-0.327215	3.01671	4.22e-08	nitrate transporter 2.2
AT1G08110.1	733	844	912	1084	911	930	6.49168	-0.263698	6.31e-05	lactoylglutathione lyase family protein / glyoxalase I family protein
AT1G08110.2	733	851	912	1081	914	931	6.49629	-0.267169	6.51e-05	lactoylglutathione lyase family protein / glyoxalase I family protein
AT1G08110.3	733	847	912	1077	921	937	6.50085	-0.260187	0.000109219	lactoylglutathione lyase family protein / glyoxalase I family protein
AT1G08110.4	750	863	933	1113	929	960	6.52629	-0.258992	7.57e-05	lactoylglutathione lyase family protein / glyoxalase I family protein
AT1G08120.1	0	0	0	0	0	2	-1.97282	2.47446	0.726644	unknown protein
AT1G08125.1	133	121	153	188	174	171	3.99053	-0.107089	0.54887	S-adenosyl-L-methionine-dependent methyltransferases superfamily protein
AT1G08125.2	131	115	144	177	163	159	3.92894	-0.141023	0.394236	S-adenosyl-L-methionine-dependent methyltransferases superfamily protein
AT1G08125.3	88	91	96	119	122	113	3.4476	-0.131675	0.547116	S-adenosyl-L-methionine-dependent methyltransferases superfamily protein
AT1G08130.1	383	442	423	687	599	569	5.70813	0.0735168	0.517658	DNA ligase 1
AT1G08140.1	0	0	0	0	0	0	-2.68607	-5.13e-15	1	cation/H+ exchanger 6A
AT1G08150.1	0	0	0	0	0	0	-2.68619	-5.13e-15	1	Cation/hydrogen exchanger family protein
AT1G08160.1	112	102	117	159	144	204	3.51594	0.117233	0.649443	Late embryogenesis abundant (LEA) hydroxyproline-rich glycoprotein family
AT1G08165.1	7	2	4	6	12	10	-0.296545	0.600482	0.538134	unknown protein
AT1G08170.1	1	1	0	0	1	1	-2.06339	-0.419654	1	Histone superfamily protein
AT1G08180.1	33	46	49	46	44	41	2.03526	-0.460459	0.0616528	unknown protein
AT1G08190.1	1124	1265	1377	1884	1717	1758	7.08098	0.0140189	0.988934	vacuolar protein sorting 41
AT1G08200.1	2105	2237	2462	3355	2995	3280	7.96046	0.00455226	1	UDP-D-apiose/UDP-D-xylose synthase 2
AT1G08210.1	128	148	142	191	176	207	4.03972	-0.0391592	0.901289	Eukaryotic aspartyl protease family protein
AT1G08220.1	54	84	64	157	113	150	3.31668	0.555128	0.00270921	unknown protein
AT1G08220.2	37	72	47	121	84	115	2.94572	0.534612	0.0227805	unknown protein
AT1G08230.2	101	109	141	142	138	121	3.77984	-0.302316	0.0388167	Transmembrane amino acid transporter family protein
AT1G08250.1	177	189	189	237	242	254	4.31556	-0.094903	0.531624	arogenate dehydratase 6
AT1G08260.1	294	367	368	560	457	549	5.27832	0.108648	0.467351	DNA polymerase epsilon catalytic subunit
AT1G08270.1	9	5	5	12	7	13	-0.00375967	0.248835	0.883374	unknown protein
AT1G08270.2	19	21	20	42	21	32	1.58764	0.159135	0.875886	unknown protein
AT1G08280.1	62	68	98	147	114	141	3.37481	0.323181	0.0690819	Glycosyltransferase family 29 (sialyltransferase) family protein
AT1G08290.1	22	46	39	67	62	57	1.82533	0.305079	0.372412	WIP domain protein 3
AT1G08300.1	24	29	42	37	49	45	2.29764	-0.0272866	1	no vein-like
AT1G08310.1	14	11	15	40	34	26	0.934754	0.819632	0.0224526	alpha/beta-Hydrolases superfamily protein
AT1G08310.2	13	11	15	40	32	26	0.906289	0.826752	0.0248274	alpha/beta-Hydrolases superfamily protein
AT1G08315.1	40	62	56	78	63	76	2.54744	-0.0384409	1	ARM repeat superfamily protein
AT1G08320.1	99	109	88	133	153	139	3.22337	0.0229974	1	bZIP transcription factor family protein
AT1G08320.2	85	91	73	115	135	113	2.99823	0.0446426	1	bZIP transcription factor family protein
AT1G08320.3	99	105	83	133	147	131	3.18786	0.0166254	1	bZIP transcription factor family protein
AT1G08340.1	54	55	54	136	134	143	2.73624	0.842749	8.61e-05	Rho GTPase activating protein with PAK-box/P21-Rho-binding domain
AT1G08350.1	91	108	114	156	137	151	3.47063	0.0086276	1	Endomembrane protein 70 protein family
AT1G08350.2	95	111	117	160	140	152	3.50646	-0.0113215	1	Endomembrane protein 70 protein family
AT1G08360.1	1949	2134	2266	4466	3676	4010	8.14693	0.437395	3.73e-16	Ribosomal protein L1p/L10e family
AT1G08370.1	211	256	268	374	305	386	4.87468	0.0384372	0.899968	decapping 1
AT1G08380.1	16450	17606	20394	21321	19925	19666	11.074	-0.331065	2.13e-07	photosystem I subunit O
AT1G08390.1	49	43	58	70	64	61	2.7509	-0.117574	0.726644	unknown protein
AT1G08400.1	55	62	73	97	95	98	2.94708	0.114818	0.679046	RINT-1 / TIP-1 family
AT1G08410.1	162	182	177	326	291	342	4.50457	0.382706	0.000458935	P-loop containing nucleoside triphosphate hydrolases superfamily protein
AT1G08420.1	503	607	609	818	747	763	5.91609	-0.0582859	0.625139	BRI1 suppressor 1 (BSU1)-like 2
AT1G08420.2	505	597	604	812	742	757	5.90434	-0.0581204	0.619254	BRI1 suppressor 1 (BSU1)-like 2
AT1G08430.1	103	126	82	142	121	102	3.05931	-0.279836	0.462682	aluminum-activated malate transporter 1
AT1G08440.1	3	5	7	8	6	2	-0.581812	-0.392811	0.811997	Aluminium activated malate transporter family protein
AT1G08450.1	409	394	469	591	571	591	5.51433	-0.0327123	0.866808	calreticulin 3
AT1G08450.2	339	313	388	493	481	473	5.2481	-0.0189042	0.990894	calreticulin 3
AT1G08450.3	368	343	411	505	499	519	5.30805	-0.0547059	0.710606	calreticulin 3
AT1G08460.1	183	170	201	206	200	188	4.12468	-0.395634	0.000262108	histone deacetylase 8
AT1G08465.1	89	75	128	122	135	127	3.54424	-0.0916311	0.829737	Plant-specific transcription factor YABBY family protein
AT1G08470.1	150	169	182	272	249	237	4.2158	0.101378	0.544354	strictosidine synthase-like 3
AT1G08480.1	471	544	509	1015	826	898	6.02788	0.344507	0.000157166	unknown protein
AT1G08490.1	433	456	538	681	603	592	5.68392	-0.100825	0.327475	chloroplastic NIFS-like cysteine desulfurase
AT1G08500.1	50	59	53	87	85	109	2.4935	0.29693	0.39516	early nodulin-like protein 18
AT1G08510.1	784	775	948	1112	1027	1043	6.37017	-0.150767	0.0600361	fatty acyl-ACP thioesterases B
AT1G08520.1	1734	1914	2158	3123	2907	2928	7.84431	0.132307	0.147536	ALBINA 1
AT1G08530.1	89	103	122	146	129	130	3.47564	-0.128085	0.528241	unknown protein
AT1G08540.1	934	1011	1331	1676	1540	1533	7.01029	0.0469028	0.762621	RNApolymerase sigma subunit 2
AT1G08550.1	475	522	636	525	488	550	6.04754	-0.555012	1.17e-09	non-photochemical quenching 1
AT1G08550.2	466	505	621	511	481	528	6.02043	-0.558496	9.27e-10	non-photochemical quenching 1
AT1G08560.1	197	257	287	613	529	558	5.09198	0.705057	3.38e-10	syntaxin of plants 111
AT1G08570.1	856	836	954	687	588	724	6.18956	-0.902818	6.18e-36	atypical CYS HIS rich thioredoxin 4
AT1G08570.2	727	734	806	594	508	608	5.98015	-0.905147	1.55e-36	atypical CYS HIS rich thioredoxin 4
AT1G08570.3	772	754	865	607	545	658	6.05488	-0.898857	7.92e-33	atypical CYS HIS rich thioredoxin 4
AT1G08570.4	766	752	860	604	541	650	6.04658	-0.902995	1.39e-33	atypical CYS HIS rich thioredoxin 4
AT1G08580.1	312	330	360	585	504	612	5.55109	0.266184	0.00496771	unknown protein
AT1G08590.1	143	139	153	326	315	303	3.93626	0.620438	0.000472442	Leucine-rich receptor-like protein kinase family protein
AT1G08600.1	429	430	508	680	597	647	5.60501	-0.00330992	1	P-loop containing nucleoside triphosphate hydrolases superfamily protein
AT1G08600.2	441	432	510	688	605	657	5.62035	-0.00129073	1	P-loop containing nucleoside triphosphate hydrolases superfamily protein
AT1G08600.3	440	441	518	696	609	666	5.64043	-0.00209859	1	P-loop containing nucleoside triphosphate hydrolases superfamily protein
AT1G08600.4	442	440	516	693	609	661	5.63331	-0.00706091	1	P-loop containing nucleoside triphosphate hydrolases superfamily protein
AT1G08610.1	63	50	67	108	132	105	3.45695	0.444859	0.0241669	Pentatricopeptide repeat (PPR) superfamily protein
AT1G08620.1	377	416	474	571	530	551	5.34012	-0.111744	0.293772	Transcription factor jumonji (jmj) family protein / zinc finger (C5HC2 type) family protein
AT1G08620.2	389	429	480	590	543	562	5.37275	-0.110058	0.299329	Transcription factor jumonji (jmj) family protein / zinc finger (C5HC2 type) family protein
AT1G08630.1	15	28	23	18	14	19	1.43566	-0.862454	0.016134	threonine aldolase 1
AT1G08630.2	15	28	23	18	14	19	1.42249	-0.862537	0.0147423	threonine aldolase 1
AT1G08630.3	15	29	24	18	14	19	1.44233	-0.905363	0.00700924	threonine aldolase 1
AT1G08630.4	15	27	22	17	11	19	1.36306	-0.935634	0.00673083	threonine aldolase 1
AT1G08630.5	14	23	21	18	12	14	1.23051	-0.888548	0.0201912	threonine aldolase 1
AT1G08640.1	555	622	691	1079	1030	1013	6.36953	0.247243	0.00214028	Chloroplast J-like domain 1
AT1G08650.1	242	331	360	473	440	398	5.15612	0.000925644	1	phosphoenolpyruvate carboxylase kinase 1
AT1G08650.2	182	241	251	340	317	293	4.67287	0.00314054	1	phosphoenolpyruvate carboxylase kinase 1
AT1G08660.1	269	281	306	387	340	338	4.92376	-0.181992	0.0821674	MALE GAMETOPHYTE DEFECTIVE 2
AT1G08660.2	278	292	304	389	346	348	4.95431	-0.188296	0.0681014	MALE GAMETOPHYTE DEFECTIVE 2
AT1G08670.1	18	7	16	33	36	22	1.06433	0.649102	0.249603	ENTH/VHS family protein
AT1G08680.1	339	383	418	521	450	499	5.31903	-0.129374	0.219135	ARF GAP-like zinc finger-containing protein ZIGA4
AT1G08680.2	333	377	410	508	443	496	5.29513	-0.126456	0.239796	ARF GAP-like zinc finger-containing protein ZIGA4
AT1G08680.3	315	363	379	480	422	454	5.20739	-0.137059	0.203012	ARF GAP-like zinc finger-containing protein ZIGA4
AT1G08680.4	322	366	400	500	426	477	5.24154	-0.129404	0.227165	ARF GAP-like zinc finger-containing protein ZIGA4
AT1G08700.1	223	215	236	361	373	353	4.77489	0.19356	0.0755488	Presenilin-1
AT1G08710.1	56	84	70	100	97	89	3.11631	-0.0500284	0.940224	F-box family protein
AT1G08710.2	48	72	56	91	76	80	2.84408	-0.00884786	1	F-box family protein
AT1G08720.1	230	246	259	309	266	271	4.52361	-0.294615	0.00584549	Protein kinase superfamily protein
AT1G08730.1	14	23	18	29	28	31	0.984025	0.180929	0.78776	Myosin family protein with Dil domain
AT1G08750.1	116	119	129	171	147	150	3.68267	-0.13447	0.436559	Peptidase C13 family
AT1G08750.2	114	119	128	169	146	149	3.66868	-0.134859	0.438787	Peptidase C13 family
AT1G08750.3	129	128	134	185	165	167	3.78893	-0.0945345	0.634783	Peptidase C13 family
AT1G08760.1	181	180	196	285	229	259	4.20994	-0.0265849	0.976806	Plant protein of unknown function (DUF936)
AT1G08770.1	100	113	104	163	120	121	3.58757	-0.149423	0.41192	prenylated RAB acceptor 1.E
AT1G08780.1	151	185	194	294	264	277	4.45167	0.159897	0.193815	ABI3-interacting protein 3
AT1G08800.1	251	201	257	335	248	301	4.45837	-0.185291	0.285593	Protein of unknown function, DUF593
AT1G08800.2	255	204	261	340	256	309	4.47999	-0.173258	0.316777	Protein of unknown function, DUF593
AT1G08810.1	68	74	96	99	91	103	3.04497	-0.19407	0.375481	myb domain protein 60
AT1G08810.2	52	53	72	66	72	79	2.68416	-0.198356	0.479637	myb domain protein 60
AT1G08820.1	318	339	365	446	449	476	5.14868	-0.0710095	0.644005	vamp/synaptobrevin-associated protein 27-2
AT1G08820.2	328	341	374	457	460	484	5.17492	-0.069121	0.669975	vamp/synaptobrevin-associated protein 27-2
AT1G08830.1	200	146	207	364	249	346	4.56166	0.289643	0.0832244	copper/zinc superoxide dismutase 1
AT1G08830.2	169	132	194	305	208	299	4.4048	0.212443	0.268813	copper/zinc superoxide dismutase 1
AT1G08840.1	92	91	98	143	129	136	3.49059	0.0404466	0.974132	DNA replication helicase, putative
AT1G08840.2	100	103	110	159	140	150	3.64759	0.0230368	1	DNA replication helicase, putative
AT1G08845.1	44	50	48	63	57	70	2.68805	-0.0766068	0.884227	Ribosomal L18p/L5e family protein
AT1G08845.2	37	45	41	59	43	61	2.4594	-0.0918599	0.839367	Ribosomal L18p/L5e family protein
AT1G08860.1	2	1	1	1	0	5	-1.37621	0.0752663	1	Calcium-dependent phospholipid-binding Copine family protein
AT1G08880.1	652	657	719	1058	943	950	6.37	0.0431306	0.736285	Histone superfamily protein
AT1G08890.1	114	96	88	173	181	172	3.96577	0.315791	0.201881	Major facilitator superfamily protein
AT1G08900.1	151	131	128	117	78	115	3.5449	-0.911544	3.91e-07	Major facilitator superfamily protein
AT1G08900.2	160	137	129	120	83	118	3.61525	-0.91735	2.14e-07	Major facilitator superfamily protein
AT1G08900.3	150	128	122	112	80	112	3.55041	-0.903642	3.27e-07	Major facilitator superfamily protein
AT1G08910.1	203	223	226	289	245	268	4.74993	-0.199626	0.143857	zinc ion binding;zinc ion binding
AT1G08920.1	275	251	245	338	327	384	4.81744	-0.0585461	0.871263	ERD (early response to dehydration) six-like 1
AT1G08920.2	268	234	231	310	306	364	4.72877	-0.0844104	0.7747	ERD (early response to dehydration) six-like 1
AT1G08920.3	218	188	205	281	249	301	4.48902	-0.0589292	0.876428	ERD (early response to dehydration) six-like 1
AT1G08930.1	451	494	396	668	479	585	5.47901	-0.144795	0.632297	Major facilitator superfamily protein
AT1G08930.2	450	495	394	668	479	584	5.47745	-0.143595	0.637115	Major facilitator superfamily protein
AT1G08940.1	82	85	80	110	95	102	2.95294	-0.187694	0.550622	Phosphoglycerate mutase family protein
AT1G08960.1	112	94	137	186	141	180	3.67949	0.0665141	0.816617	cation exchanger 11
AT1G08970.1	314	267	334	383	346	350	5.0788	-0.259962	0.014132	nuclear factor Y, subunit C9
AT1G08970.2	357	306	371	427	375	402	5.24292	-0.279125	0.00437187	nuclear factor Y, subunit C9
AT1G08970.3	340	290	363	415	363	390	5.2017	-0.26411	0.0105554	nuclear factor Y, subunit C9
AT1G08970.4	328	279	349	389	336	373	5.15535	-0.298566	0.00298062	nuclear factor Y, subunit C9
AT1G08980.1	187	215	216	165	159	172	4.44619	-0.812811	8.57e-11	amidase 1
AT1G08990.1	63	76	50	157	111	139	2.88406	0.592456	0.0571907	plant glycogenin-like starch initiation protein 5
AT1G09000.1	64	71	62	94	76	96	2.86382	-0.0676323	0.911832	NPK1-related protein kinase 1
AT1G09010.1	709	707	861	932	878	892	6.22218	-0.247477	0.000775571	glycoside hydrolase family 2 protein
AT1G09020.1	418	493	514	773	667	634	5.69665	0.0448283	0.781202	homolog of yeast sucrose nonfermenting 4
AT1G09030.1	1	1	0	0	1	0	-2.47188	-1.18137	1	nuclear factor Y, subunit B4
AT1G09040.1	45	43	64	80	91	75	2.72362	0.204195	0.481094	unknown protein
AT1G09050.1	40	48	77	81	81	61	2.68834	-0.0544671	0.99846	unknown protein
AT1G09060.1	442	472	560	590	537	545	5.60908	-0.312773	9.41e-05	Zinc finger, RING-type;Transcription factor jumonji/aspartyl beta-hydroxylase
AT1G09060.2	449	481	568	597	544	550	5.6299	-0.319833	4.61e-05	Zinc finger, RING-type;Transcription factor jumonji/aspartyl beta-hydroxylase
AT1G09060.3	442	475	560	591	537	547	5.61167	-0.313171	8.7e-05	Zinc finger, RING-type;Transcription factor jumonji/aspartyl beta-hydroxylase
AT1G09070.1	625	717	757	924	759	784	6.1481	-0.264788	0.00281927	soybean gene regulated by cold-2
AT1G09080.1	5	2	13	12	10	17	0.0497121	0.487966	0.714476	Heat shock protein 70 (Hsp 70) family protein
AT1G09080.2	6	2	14	12	10	19	0.0926196	0.422555	0.783544	Heat shock protein 70 (Hsp 70) family protein
AT1G09090.1	49	37	51	87	76	65	2.34867	0.234146	0.666541	respiratory burst oxidase homolog B
AT1G09090.2	52	40	52	91	80	65	2.40953	0.210772	0.726644	respiratory burst oxidase homolog B
AT1G09100.1	280	276	314	393	373	351	4.84498	-0.135768	0.36282	26S proteasome AAA-ATPase subunit RPT5B
AT1G09130.1	1324	1502	1749	2089	1800	1918	7.37625	-0.149649	0.047484	ATP-dependent caseinolytic (Clp) protease/crotonase family protein
AT1G09130.2	1105	1258	1466	1773	1515	1624	7.12	-0.134512	0.0936661	ATP-dependent caseinolytic (Clp) protease/crotonase family protein
AT1G09130.3	1145	1326	1530	1824	1572	1705	7.17312	-0.142979	0.0731013	ATP-dependent caseinolytic (Clp) protease/crotonase family protein
AT1G09140.1	615	688	686	890	799	880	6.16932	-0.12844	0.106415	SERINE-ARGININE PROTEIN 30
AT1G09140.2	729	790	814	1023	903	971	6.38971	-0.185607	0.0104891	SERINE-ARGININE PROTEIN 30
AT1G09150.1	229	220	298	436	388	408	4.98103	0.226972	0.0255848	pseudouridine synthase and archaeosine transglycosylase (PUA) domain-containing protein
AT1G09155.1	12	6	5	16	16	24	0.121793	0.770361	0.180823	phloem protein 2-B15
AT1G09157.1	0	0	0	0	0	0	-2.57512	-5.13e-15	1	Protein of unknown function (DUF679)
AT1G09160.1	261	295	297	425	361	395	5.06882	-0.0284683	0.926694	Protein phosphatase 2C family protein
AT1G09160.2	244	281	280	408	344	378	4.99374	-0.00851749	1	Protein phosphatase 2C family protein
AT1G09170.1	41	28	37	79	76	66	1.75491	0.559593	0.0478912	P-loop nucleoside triphosphate hydrolases superfamily protein with CH (Calponin Homology) domain
AT1G09176.1	3	1	1	2	2	5	-1.58806	0.329266	0.97617	unknown protein
AT1G09180.1	18	31	30	21	30	25	1.37306	-0.54377	0.125156	secretion-associated RAS super family 1
AT1G09190.1	15	21	21	40	28	40	1.6911	0.422975	0.224263	Tetratricopeptide repeat (TPR)-like superfamily protein
AT1G09195.1	51	54	63	52	43	39	2.3062	-0.820786	8.05e-05	unknown protein
AT1G09195.2	64	69	67	60	49	55	2.57786	-0.781795	6.86e-06	unknown protein
AT1G09200.1	705	800	839	1471	1121	1243	6.75319	0.209734	0.029473	Histone superfamily protein
AT1G09210.1	1545	1620	1625	3147	2728	2980	7.56765	0.3852	1.59e-07	calreticulin 1b
AT1G09220.1	11	15	14	15	25	22	0.854454	0.137003	0.899234	Pentatricopeptide repeat (PPR) superfamily protein
AT1G09230.1	180	185	232	227	193	190	4.36246	-0.464506	1.68e-05	RNA-binding (RRM/RBD/RNP motifs) family protein
AT1G09240.1	40	47	54	47	59	45	2.42978	-0.391431	0.173786	nicotianamine synthase 3
AT1G09250.1	178	189	209	320	219	257	4.45594	-0.0331395	0.917336	basic helix-loop-helix (bHLH) DNA-binding superfamily protein
AT1G09260.1	0	0	0	0	0	0	-2.68619	-5.13e-15	1	Chaperone DnaJ-domain superfamily protein
AT1G09270.1	697	699	741	1158	925	1024	6.20322	0.0380155	0.835957	importin alpha isoform 4
AT1G09270.2	626	632	671	1075	859	945	6.0636	0.0759987	0.556067	importin alpha isoform 4
AT1G09270.3	661	668	701	1118	895	974	6.13855	0.055286	0.700021	importin alpha isoform 4
AT1G09280.1	152	188	184	223	218	242	4.288	-0.112964	0.484772	unknown protein
AT1G09290.1	89	108	120	180	152	136	3.7076	0.0659398	0.830379	unknown protein
AT1G09300.1	77	86	79	156	141	139	3.47567	0.351856	0.0191109	Metallopeptidase M24 family protein
AT1G09300.2	83	89	94	191	168	151	3.64111	0.441609	0.00177347	Metallopeptidase M24 family protein
AT1G09310.1	5993	6791	8141	9353	9253	9191	10.1029	-0.0777389	0.478031	Protein of unknown function, DUF538
AT1G09320.1	60	73	82	100	91	91	3.12529	-0.104016	0.709407	agenet domain-containing protein
AT1G09330.1	309	312	328	482	438	434	5.09837	0.0147096	1	unknown protein
AT1G09340.1	9574	10436	11838	15539	13510	14709	10.2293	-0.0368775	0.764308	chloroplast RNA binding
AT1G09350.1	7	12	20	19	13	8	1.46357	-0.450173	0.476269	galactinol synthase 3
AT1G09370.1	0	1	0	2	1	5	-2.08229	2.18903	0.181327	Plant invertase/pectin methylesterase inhibitor superfamily protein
AT1G09380.1	4	3	3	1	5	4	-1.4468	-0.476765	0.739752	nodulin MtN21 /EamA-like transporter family protein
AT1G09390.1	153	151	172	129	149	138	3.91836	-0.688459	8.46e-08	GDSL-like Lipase/Acylhydrolase superfamily protein
AT1G09400.1	7	3	3	3	3	1	-1.41049	-1.34162	0.216061	FMN-linked oxidoreductases superfamily protein
AT1G09410.1	10	9	10	22	17	18	0.558644	0.473189	0.387295	pentatricopeptide (PPR) repeat-containing protein
AT1G09415.1	86	118	117	100	88	102	3.31616	-0.641187	1.91e-05	NIM1-interacting 3
AT1G09420.1	66	91	75	133	127	124	3.31569	0.2301	0.305822	glucose-6-phosphate dehydrogenase 4
AT1G09420.2	64	88	75	130	123	118	3.28379	0.212142	0.351726	glucose-6-phosphate dehydrogenase 4
AT1G09430.1	562	562	686	963	727	870	5.89061	0.0014381	1	ATP-citrate lyase A-3
AT1G09440.1	98	121	119	141	130	128	3.40503	-0.256337	0.159979	Protein kinase superfamily protein
AT1G09450.1	51	59	53	92	85	70	2.72328	0.10222	0.769761	Protein kinase superfamily protein
AT1G09460.1	39	46	30	69	70	67	2.24409	0.339375	0.293772	Carbohydrate-binding X8 domain superfamily protein
AT1G09470.1	62	74	76	142	106	105	3.28725	0.236656	0.279488	unknown protein
AT1G09470.2	62	69	73	138	103	96	3.19593	0.224644	0.33599	unknown protein
AT1G09480.1	10	15	18	11	17	11	0.960609	-0.624923	0.249363	NAD(P)-binding Rossmann-fold superfamily protein
AT1G09483.1	3	4	3	10	9	10	-0.41102	1.01674	0.14038	unknown protein
AT1G09486.1	96	94	105	201	160	187	3.75053	0.395174	0.0042493	pseudogene
AT1G09490.1	295	352	397	350	279	295	5.01093	-0.671455	5.56e-11	NAD(P)-binding Rossmann-fold superfamily protein
AT1G09490.2	261	302	343	283	240	247	4.78597	-0.729524	7.55e-13	NAD(P)-binding Rossmann-fold superfamily protein
AT1G09500.1	80	147	260	18	40	26	2.42465	-2.97092	8.37e-16	NAD(P)-binding Rossmann-fold superfamily protein
AT1G09500.2	71	156	255	16	40	21	2.38547	-3.076	7.19e-15	NAD(P)-binding Rossmann-fold superfamily protein
AT1G09500.3	65	114	215	13	31	23	2.09726	-2.98989	5.86e-15	NAD(P)-binding Rossmann-fold superfamily protein
AT1G09510.1	1	4	4	0	0	0	-2.47124	-4.8993	0.0116186	NAD(P)-binding Rossmann-fold superfamily protein
AT1G09520.1	86	110	102	161	127	129	3.66122	-0.0130895	1	unknown protein
AT1G09530.1	115	106	135	157	138	145	3.69616	-0.190653	0.244213	phytochrome interacting factor 3
AT1G09530.2	110	104	134	151	133	143	3.67197	-0.20075	0.219611	phytochrome interacting factor 3
AT1G09540.1	30	19	15	37	36	45	1.16372	0.369998	0.488243	myb domain protein 61
AT1G09560.1	860	879	796	1655	1573	1755	6.52001	0.470651	0.0763354	germin-like protein 5
AT1G09570.1	683	780	852	1311	1177	1249	6.34025	0.195863	0.0100444	phytochrome A
AT1G09570.2	658	761	817	1275	1137	1192	6.28809	0.193325	0.0132744	phytochrome A
AT1G09575.1	16	23	27	36	27	32	1.21567	0.0301031	1	Protein of unknown function (DUF607)
AT1G09580.1	102	103	118	200	186	190	3.74166	0.338138	0.0177506	emp24/gp25L/p24 family/GOLD family protein
AT1G09590.1	1883	2140	2195	5072	4193	4339	8.25733	0.630013	1.15e-20	Translation protein SH3-like family protein
AT1G09600.1	12	17	18	46	38	33	1.40525	0.81527	0.0071293	Protein kinase superfamily protein
AT1G09610.1	10	14	10	16	5	10	0.555054	-0.636012	0.323809	Protein of unknown function (DUF579)
AT1G09620.1	1293	1313	1496	2766	2286	2365	7.37155	0.355639	9.94e-10	ATP binding;leucine-tRNA ligases;aminoacyl-tRNA ligases;nucleotide binding;ATP binding;aminoacyl-tRNA ligases
AT1G09630.1	118	176	188	296	226	252	4.30965	0.188154	0.185592	RAB GTPase 11C
AT1G09640.1	1580	1665	1837	3332	2775	3140	7.75606	0.365013	5.47e-10	Translation elongation factor EF1B, gamma chain
AT1G09640.2	909	983	1091	1964	1631	1904	6.9837	0.38483	1.57e-08	Translation elongation factor EF1B, gamma chain
AT1G09645.1	117	131	138	172	157	175	3.70634	-0.111303	0.591336	unknown protein
AT1G09650.1	6	8	6	7	4	8	-0.285766	-0.561157	0.573137	F-box and associated interaction domains-containing protein
AT1G09660.1	262	265	319	456	462	472	5.23337	0.222403	0.0230011	RNA-binding KH domain-containing protein
AT1G09660.2	244	244	292	426	425	434	5.11788	0.2258	0.0285056	RNA-binding KH domain-containing protein
AT1G09665.1	0	0	0	0	0	0	-2.7153	-5.13e-15	1	Toll-Interleukin-Resistance (TIR) domain family protein
AT1G09680.1	15	8	16	15	23	22	0.842791	0.126479	0.899314	Pentatricopeptide repeat (PPR) superfamily protein
AT1G09690.1	2666	3123	3193	6630	5359	5685	8.70499	0.477249	9.07e-14	Translation protein SH3-like family protein
AT1G09700.1	153	169	191	358	283	295	4.67467	0.369788	0.00157483	dsRNA-binding domain-like superfamily protein
AT1G09710.1	53	61	60	88	75	82	3.01451	-0.00377872	1	Homeodomain-like superfamily protein
AT1G09710.2	44	57	52	82	66	74	2.88062	0.0392207	1	Homeodomain-like superfamily protein
AT1G09720.1	0	0	0	0	0	0	-2.71531	-5.13e-15	1	Kinase interacting (KIP1-like) family protein
AT1G09730.1	292	343	285	468	417	432	5.09272	0.0165969	1	Cysteine proteinases superfamily protein
AT1G09730.2	298	352	293	479	425	440	5.12243	0.0102578	1	Cysteine proteinases superfamily protein
AT1G09740.1	396	427	383	726	609	626	5.32608	0.195129	0.507321	Adenine nucleotide alpha hydrolases-like superfamily protein
AT1G09750.1	769	884	954	1715	1536	1571	6.91275	0.392336	5.37e-05	Eukaryotic aspartyl protease family protein
AT1G09760.1	415	463	485	678	546	598	5.71301	-0.079504	0.440811	U2 small nuclear ribonucleoprotein A
AT1G09770.1	868	975	1038	1600	1430	1478	6.81273	0.149709	0.043572	cell division cycle 5
AT1G09780.1	1398	1570	1610	4077	3306	3596	7.65077	0.761502	1.14e-18	Phosphoglycerate mutase, 2,3-bisphosphoglycerate-independent
AT1G09790.1	4	0	1	1	0	0	-2.28526	-2.39318	0.295209	COBRA-like protein 6 precursor
AT1G09794.1	22	35	19	42	42	34	1.64335	0.135635	0.826362	Cox19 family protein (CHCH motif)
AT1G09795.1	358	449	453	745	777	807	5.90968	0.394461	1.27e-05	ATP phosphoribosyl transferase 2
AT1G09800.1	33	49	51	80	72	85	2.74037	0.338145	0.155451	Pseudouridine synthase family protein
AT1G09810.1	89	84	104	147	137	147	3.60244	0.141516	0.465805	evolutionarily conserved C-terminal region 11
AT1G09812.1	9	7	8	9	9	10	-0.0963321	-0.271006	0.811039	unknown protein
AT1G09815.1	161	164	198	279	252	246	4.48609	0.0750563	0.653277	polymerase delta 4
AT1G09820.1	68	71	71	123	101	105	2.99269	0.149382	0.547374	Pentatricopeptide repeat (PPR-like) superfamily protein
AT1G09830.1	267	294	337	625	549	540	5.49417	0.436816	8.49e-07	Glycinamide ribonucleotide (GAR) synthetase
AT1G09840.1	377	429	450	575	540	520	5.47272	-0.1152	0.253421	shaggy-like protein kinase 41
AT1G09840.2	368	423	437	553	524	492	5.43111	-0.142077	0.154381	shaggy-like protein kinase 41
AT1G09840.3	367	421	432	552	517	487	5.41933	-0.145	0.149459	shaggy-like protein kinase 41
AT1G09840.4	362	418	430	550	513	480	5.41199	-0.145175	0.140514	shaggy-like protein kinase 41
AT1G09840.5	363	416	429	545	515	481	5.4072	-0.144504	0.149459	shaggy-like protein kinase 41
AT1G09840.6	362	416	429	545	515	481	5.40651	-0.143262	0.154087	shaggy-like protein kinase 41
AT1G09850.1	235	262	292	485	431	447	4.97069	0.292926	0.00437473	xylem bark cysteine peptidase 3
AT1G09860.1	1	4	0	2	1	6	-1.56194	0.32956	0.974869	purine permease 16
AT1G09870.1	200	240	278	368	313	327	4.64236	-0.00606781	1	histidine acid phosphatase family protein
AT1G09880.1	9	14	15	23	18	25	0.75175	0.301766	0.727017	Rhamnogalacturonate lyase family protein
AT1G09890.1	46	49	53	58	52	52	2.13965	-0.365444	0.13799	Rhamnogalacturonate lyase family protein
AT1G09900.1	170	166	213	343	336	287	4.73084	0.321401	0.00899404	Pentatricopeptide repeat (PPR-like) superfamily protein
AT1G09910.1	135	154	181	200	176	174	3.92767	-0.268128	0.051767	Rhamnogalacturonate lyase family protein
AT1G09920.1	263	277	302	354	353	316	4.81213	-0.214068	0.102902	TRAF-type zinc finger-related
AT1G09930.1	0	2	0	0	0	0	-2.22162	-2.894	0.726644	oligopeptide transporter 2
AT1G09932.1	38	44	36	50	23	65	2.00416	-0.28546	0.597025	Phosphoglycerate mutase family protein
AT1G09932.2	36	43	33	46	23	62	1.92719	-0.284441	0.592983	Phosphoglycerate mutase family protein
AT1G09940.1	159	168	159	254	230	249	4.15365	0.0946467	0.591207	Glutamyl-tRNA reductase family protein
AT1G09950.1	2	5	6	5	6	4	-0.341386	-0.277369	1	RESPONSE TO ABA AND SALT 1
AT1G09960.1	66	91	89	124	130	105	3.03341	0.0526648	0.920612	sucrose transporter 4
AT1G09970.1	1329	1436	1474	2093	1612	1760	6.94741	-0.136822	0.335861	Leucine-rich receptor-like protein kinase family protein
AT1G09970.2	1281	1371	1430	2020	1562	1703	6.89804	-0.130262	0.369012	Leucine-rich receptor-like protein kinase family protein
AT1G09980.1	323	390	397	491	485	486	5.34399	-0.0968564	0.433494	Putative serine esterase family protein
AT1G09980.2	319	382	397	484	482	482	5.32085	-0.0946697	0.44903	Putative serine esterase family protein
AT1G09995.1	25	29	32	44	35	35	1.60828	-0.0897404	0.884227	DNA repair DEAD helicase RAD3/XP-D subfamily protein
AT1G10000.1	7	9	3	5	4	10	-0.329924	-0.496237	0.633079	Ribonuclease H-like superfamily protein
AT1G10010.1	1	0	0	0	0	0	-2.472	-2.07839	1	amino acid permease 8
AT1G10020.1	124	136	160	223	172	194	3.74288	-0.00915593	1	Protein of unknown function (DUF1005)
AT1G10030.1	105	127	124	230	187	244	3.90869	0.394526	0.00962491	homolog of yeast ergosterol28
AT1G10040.1	43	46	36	48	58	60	2.10869	-0.0880961	0.900227	alpha/beta-Hydrolases superfamily protein
AT1G10040.2	39	43	32	41	53	51	1.98782	-0.149707	0.73131	alpha/beta-Hydrolases superfamily protein
AT1G10050.1	143	158	141	234	228	271	3.94108	0.230367	0.29625	glycosyl hydrolase family 10 protein / carbohydrate-binding domain-containing protein
AT1G10060.1	95	99	92	107	113	97	3.97438	-0.348901	0.0857305	branched-chain amino acid transaminase 1
AT1G10060.2	108	106	98	120	122	111	4.13644	-0.320569	0.0767637	branched-chain amino acid transaminase 1
AT1G10060.3	98	95	84	108	104	98	3.97565	-0.337329	0.0666232	branched-chain amino acid transaminase 1
AT1G10070.1	32	41	41	34	35	39	1.68062	-0.569061	0.108594	branched-chain amino acid transaminase 2
AT1G10070.2	32	41	41	31	36	37	1.65965	-0.621532	0.0795925	branched-chain amino acid transaminase 2
AT1G10070.3	31	39	41	30	36	34	1.63523	-0.638328	0.0793318	branched-chain amino acid transaminase 2
AT1G10090.1	237	244	239	349	304	326	4.98389	-0.0560887	0.769129	Early-responsive to dehydration stress protein (ERD4)
AT1G10095.1	90	108	75	120	81	61	3.65646	-0.573093	0.0410631	Protein prenylyltransferase superfamily protein
AT1G10100.1	0	0	0	0	0	0	-2.60218	-5.13e-15	1	unknown protein
AT1G10110.1	3	7	7	9	5	8	-0.101972	-0.122106	1	F-box family protein
AT1G10120.1	208	224	237	297	242	261	4.48282	-0.240106	0.0409495	basic helix-loop-helix (bHLH) DNA-binding superfamily protein
AT1G10130.1	432	485	521	742	561	634	5.69472	-0.0692475	0.551833	endoplasmic reticulum-type calcium-transporting ATPase 3
AT1G10140.1	79	82	76	92	86	95	3.04212	-0.2944	0.162824	Uncharacterised conserved protein UCP031279
AT1G10150.1	185	192	220	188	156	181	4.15131	-0.681894	1.19e-09	Carbohydrate-binding protein
AT1G10155.1	12	17	20	8	5	5	0.161424	-1.91506	8.72e-06	phloem protein 2-A10
AT1G10170.1	383	439	487	688	591	733	5.58478	0.124702	0.219611	NF-X-like 1
AT1G10180.1	285	275	298	442	373	398	5.01571	0.00063679	1	unknown protein
AT1G10200.1	378	379	416	700	633	647	5.83004	0.257867	0.00226942	GATA type zinc finger transcription factor family protein
AT1G10210.1	45	43	57	70	50	68	2.40985	-0.122249	0.744823	mitogen-activated protein kinase 1
AT1G10210.2	43	44	56	67	48	68	2.36967	-0.140763	0.68246	mitogen-activated protein kinase 1
AT1G10220.1	6	6	6	7	2	7	-0.88615	-0.654591	0.444776	unknown protein
AT1G10220.2	1	0	1	1	1	0	-2.39926	-0.418858	1	unknown protein
AT1G10230.1	68	71	108	175	142	132	3.54597	0.368439	0.0383748	SKP1-like 18
AT1G10240.1	94	97	123	147	121	125	3.55893	-0.172174	0.353443	FAR1-related sequence 11
AT1G10250.1	3	4	5	11	10	5	-0.297135	0.607502	0.486034	unknown protein
AT1G10270.1	104	151	130	318	278	318	4.40423	0.750359	1.6e-10	glutamine-rich protein 23
AT1G10280.1	49	83	69	106	88	103	2.75168	0.06711	0.882855	Core-2/I-branching beta-1,6-N-acetylglucosaminyltransferase family protein
AT1G10290.1	839	972	1011	1628	1416	1514	6.78036	0.194976	0.00851892	dynamin-like protein 6
AT1G10300.1	13	24	18	31	22	25	0.921046	0.00556546	1	Nucleolar GTP-binding protein
AT1G10310.1	196	219	235	290	266	299	4.67813	-0.100348	0.509162	NAD(P)-binding Rossmann-fold superfamily protein
AT1G10320.1	131	127	159	205	210	176	3.9663	0.00940315	1	Zinc finger C-x8-C-x5-C-x3-H type family protein
AT1G10330.1	15	16	20	45	25	22	1.20921	0.348578	0.4647	Tetratricopeptide repeat (TPR)-like superfamily protein
AT1G10340.1	33	36	38	29	20	21	1.32698	-1.11094	0.0453748	Ankyrin repeat family protein
AT1G10340.2	29	31	36	25	20	21	1.24146	-1.03291	0.0731832	Ankyrin repeat family protein
AT1G10350.1	131	135	168	186	214	181	3.99573	-0.0724585	0.745177	DNAJ heat shock family protein
AT1G10360.1	324	354	373	425	402	399	5.26492	-0.273959	0.00151187	glutathione S-transferase TAU 18
AT1G10370.1	887	995	1257	1243	1274	1361	6.77068	-0.181201	0.0781594	Glutathione S-transferase family protein
AT1G10380.1	195	163	172	162	217	181	4.04816	-0.416145	0.0220931	Putative membrane lipoprotein
AT1G10385.1	1	2	0	6	3	6	-1.67115	1.72071	0.14927	Vps51/Vps67 family (components of vesicular transport) protein
AT1G10390.1	742	753	767	1224	1029	1193	6.50539	0.105762	0.318333	Nucleoporin autopeptidase
AT1G10390.2	745	756	770	1246	1038	1203	6.513	0.116842	0.256451	Nucleoporin autopeptidase
AT1G10400.1	10	9	5	17	7	18	-0.0427188	0.294266	0.806625	UDP-Glycosyltransferase superfamily protein
AT1G10410.1	376	384	401	542	467	544	5.52982	-0.0796256	0.578389	Protein of unknown function (DUF1336)
AT1G10417.1	10	10	3	11	13	12	0.450617	0.141559	1	unknown protein
AT1G10430.1	183	223	250	380	318	320	4.63629	0.138298	0.259884	protein phosphatase 2A-2
AT1G10450.1	301	296	303	468	374	426	5.05873	-0.00555529	1	SIN3-like 6
AT1G10455.1	0	0	0	0	0	0	-2.65753	-5.13e-15	1	unknown protein
AT1G10460.1	18	6	22	23	18	24	0.828336	0.00335725	1	germin-like protein 7
AT1G10470.1	997	974	1106	1434	1168	1132	6.82867	-0.222103	0.0703495	response regulator 4
AT1G10480.1	57	61	46	70	45	50	2.46314	-0.501782	0.10347	zinc finger protein 5
AT1G10490.1	421	432	449	702	608	674	5.77306	0.108764	0.299629	Domain of unknown function (DUF1726) ;Putative ATPase (DUF699)
AT1G10500.1	549	618	752	597	574	591	5.95278	-0.614536	3.32e-16	chloroplast-localized ISCA-like protein
AT1G10510.1	464	481	550	850	755	812	5.9754	0.196754	0.0169367	RNI-like superfamily protein
AT1G10520.1	27	22	17	40	28	26	1.47622	0.00835422	1	DNA polymerase lambda (POLL)
AT1G10522.1	166	182	183	413	347	378	4.93788	0.600717	9.23e-08	unknown protein
AT1G10522.2	177	209	191	431	353	381	5.0383	0.513734	3.34e-06	unknown protein
AT1G10530.1	21	15	16	31	34	28	0.93507	0.339922	0.418437	unknown protein
AT1G10540.1	10	9	10	11	12	12	0.403712	-0.222604	0.832353	nucleobase-ascorbate transporter 8
AT1G10550.1	10	11	22	18	8	19	-0.259581	-0.422815	0.512532	xyloglucan:xyloglucosyl transferase 33
AT1G10560.1	24	18	19	44	27	34	1.06577	0.270482	0.685059	plant U-box 18
AT1G10570.1	177	192	190	267	216	240	4.34986	-0.127641	0.373796	Cysteine proteinases superfamily protein
AT1G10570.2	179	190	189	269	216	235	4.35224	-0.131294	0.358499	Cysteine proteinases superfamily protein
AT1G10580.1	327	368	440	634	521	572	5.435	0.110066	0.281158	Transducin/WD40 repeat-like superfamily protein
AT1G10585.1	9	44	95	9	12	5	0.459646	-2.91557	9.1e-06	basic helix-loop-helix (bHLH) DNA-binding superfamily protein
AT1G10586.1	0	0	0	0	0	0	-2.68619	-5.13e-15	1	basic helix-loop-helix (bHLH) DNA-binding superfamily protein
AT1G10586.2	0	0	0	0	0	0	-2.68619	-5.13e-15	1	basic helix-loop-helix (bHLH) DNA-binding superfamily protein
AT1G10590.1	591	579	703	1102	919	942	6.2351	0.164252	0.0443477	Nucleic acid-binding, OB-fold-like protein
AT1G10590.2	575	560	678	1071	891	904	6.19539	0.162934	0.0504829	Nucleic acid-binding, OB-fold-like protein
AT1G10590.3	575	560	678	1069	887	902	6.19284	0.158854	0.0570968	Nucleic acid-binding, OB-fold-like protein
AT1G10600.1	114	119	148	161	125	128	3.90111	-0.376451	0.0176215	associated molecule with the SH3 domain of STAM 2
AT1G10600.2	103	107	127	142	115	112	3.74611	-0.365711	0.0234912	associated molecule with the SH3 domain of STAM 2
AT1G10600.3	105	115	139	149	114	121	3.78633	-0.399035	0.0177243	associated molecule with the SH3 domain of STAM 2
AT1G10610.1	68	66	90	89	81	82	3.06172	-0.324065	0.12205	basic helix-loop-helix (bHLH) DNA-binding superfamily protein
AT1G10620.1	0	0	0	0	0	1	-2.57507	1.71324	1	Protein kinase superfamily protein
AT1G10630.1	457	503	544	1015	812	921	5.99223	0.370832	1.67e-05	ADP-ribosylation factor A1F
AT1G10640.1	419	456	461	509	419	430	5.47503	-0.477092	6.92e-05	Pectin lyase-like superfamily protein
AT1G10650.1	232	250	292	303	292	324	4.70585	-0.24743	0.0101197	SBP (S-ribonuclease binding protein) family protein
AT1G10650.2	219	238	282	293	276	314	4.63739	-0.238183	0.0177734	SBP (S-ribonuclease binding protein) family protein
AT1G10657.1	80	86	104	138	109	134	3.35629	0.000327564	1	Plant protein 1589 of unknown function
AT1G10657.2	94	102	114	150	134	155	3.5664	0.00573858	1	Plant protein 1589 of unknown function
AT1G10657.3	84	101	116	141	137	148	3.54312	0.00626203	1	Plant protein 1589 of unknown function
AT1G10657.4	70	85	93	127	104	127	3.29584	0.0332636	0.990172	Plant protein 1589 of unknown function
AT1G10660.1	229	284	317	290	293	330	4.85837	-0.354331	0.000920993	unknown protein
AT1G10660.2	235	288	319	289	289	326	4.86431	-0.389519	0.000331493	unknown protein
AT1G10660.3	233	284	314	290	286	322	4.85107	-0.380674	0.000363018	unknown protein
AT1G10660.4	233	282	313	287	285	321	4.8439	-0.383481	0.000333061	unknown protein
AT1G10670.1	1806	1885	2080	3537	3028	3233	7.82994	0.265547	2.04e-07	ATP-citrate lyase A-1
AT1G10670.2	1753	1852	2047	3445	2955	3155	7.80131	0.259823	3.68e-07	ATP-citrate lyase A-1
AT1G10670.3	1706	1795	1961	3367	2901	3074	7.76004	0.276275	5.52e-08	ATP-citrate lyase A-1
AT1G10670.4	1746	1842	2037	3435	2943	3146	7.79652	0.261999	2.52e-07	ATP-citrate lyase A-1
AT1G10680.1	5	7	1	7	6	5	-0.693404	-0.0301952	1	P-glycoprotein 10
AT1G10690.1	22	20	22	20	24	25	1.29912	-0.385737	0.339886	unknown protein
AT1G10700.1	164	178	184	299	249	254	4.29847	0.110563	0.464499	phosphoribosyl pyrophosphate (PRPP) synthase 3
AT1G10710.1	1	3	2	2	1	2	-0.96465	-0.711204	0.774545	poor homologous synapsis 1
AT1G10710.2	2	4	3	3	1	3	-0.838908	-0.82125	0.693222	poor homologous synapsis 1
AT1G10720.1	186	190	211	280	243	246	4.36866	-0.107279	0.415687	BSD domain-containing protein
AT1G10730.1	55	56	64	98	101	91	2.77307	0.232749	0.28212	Clathrin adaptor complexes medium subunit family protein
AT1G10740.1	298	311	365	381	321	345	4.87853	-0.392089	6.29e-06	alpha/beta-Hydrolases superfamily protein
AT1G10740.2	287	303	347	370	299	333	4.81712	-0.40026	8.93e-06	alpha/beta-Hydrolases superfamily protein
AT1G10740.3	286	296	346	370	304	326	4.79331	-0.389011	1.62e-05	alpha/beta-Hydrolases superfamily protein
AT1G10740.4	284	296	345	368	304	323	4.78382	-0.391467	1.39e-05	alpha/beta-Hydrolases superfamily protein
AT1G10750.1	26	26	42	67	52	65	2.13287	0.472066	0.0549069	Protein of Unknown Function (DUF239)
AT1G10760.1	961	1199	1334	1762	1636	1718	7.86655	0.0593113	0.568312	Pyruvate phosphate dikinase, PEP/pyruvate binding domain
AT1G10770.1	0	0	0	1	0	0	-1.6443	1.712	1	Plant invertase/pectin methylesterase inhibitor superfamily protein
AT1G10780.1	70	79	80	136	114	134	3.26189	0.247986	0.195821	F-box/RNI-like superfamily protein
AT1G10790.1	10	5	17	18	11	8	-0.080736	-0.282257	0.813683	unknown protein
AT1G10800.1	3	3	10	4	12	9	-0.509296	0.153355	1	unknown protein
AT1G10810.1	8	23	25	35	35	37	1.02377	0.442168	0.212666	NAD(P)-linked oxidoreductase superfamily protein
AT1G10820.1	151	171	195	208	208	198	4.43157	-0.246971	0.0394078	Protein of unknown function (DUF3755)
AT1G10820.2	154	188	220	225	214	212	4.51496	-0.282027	0.0148244	Protein of unknown function (DUF3755)
AT1G10830.1	225	246	283	364	329	323	4.76781	-0.0653576	0.670868	15-cis-zeta-carotene isomerase
AT1G10830.2	210	222	256	324	294	305	4.62738	-0.0719713	0.640538	15-cis-zeta-carotene isomerase
AT1G10840.1	735	759	781	1367	1185	1283	6.52463	0.253883	0.000205374	translation initiation factor 3 subunit H1
AT1G10840.2	611	657	673	1183	993	1086	6.30552	0.249909	0.000246817	translation initiation factor 3 subunit H1
AT1G10850.1	294	298	332	532	487	511	5.31044	0.230916	0.00712765	Leucine-rich repeat protein kinase family protein
AT1G10865.1	99	109	102	166	150	152	3.58593	0.0965066	0.673357	unknown protein
AT1G10865.2	79	82	88	136	111	133	3.27221	0.111948	0.651382	unknown protein
AT1G10870.1	255	272	293	375	327	367	4.82786	-0.11446	0.343537	ARF-GAP domain 4
AT1G10880.1	0	0	0	0	0	0	-2.65762	-5.13e-15	1	Core-2/I-branching beta-1,6-N-acetylglucosaminyltransferase family protein
AT1G10890.1	306	307	295	393	323	347	5.05244	-0.274263	0.00960984	unknown protein
AT1G10900.1	742	794	847	872	865	914	6.29725	-0.34125	2.66e-05	Phosphatidylinositol-4-phosphate 5-kinase family protein
AT1G10910.1	366	389	427	550	434	441	5.43682	-0.228901	0.0123106	Pentatricopeptide repeat (PPR) superfamily protein
AT1G10920.1	99	98	124	92	108	90	3.34536	-0.63904	3.8e-05	NB-ARC domain-containing disease resistance protein
AT1G10920.2	98	98	123	91	108	87	3.33743	-0.649923	3.08e-05	NB-ARC domain-containing disease resistance protein
AT1G10930.1	219	242	273	444	404	408	5.2139	0.279644	0.00854707	DNA helicase (RECQl4A)
AT1G10940.1	532	558	630	741	709	644	6.0058	-0.211231	0.0121233	Protein kinase superfamily protein
AT1G10940.2	497	517	572	695	668	600	5.89721	-0.187982	0.03963	Protein kinase superfamily protein
AT1G10950.1	968	1115	1139	1998	1654	1865	6.9235	0.277264	0.000237417	transmembrane nine 1
AT1G10960.1	3182	3513	4282	6050	5732	5627	8.75317	0.176061	0.0447988	ferredoxin 1
AT1G10970.1	42	52	54	139	104	128	2.77381	0.826238	3.23e-05	zinc transporter 4 precursor
AT1G10980.1	8	6	8	8	5	5	-0.0932142	-0.772526	0.270358	Lung seven transmembrane receptor family protein
AT1G10990.1	35	30	25	39	39	38	1.38188	-0.135088	0.819577	unknown protein
AT1G10990.2	33	28	24	42	39	40	1.42177	0.00963427	1	unknown protein
AT1G11000.1	83	67	67	144	117	119	3.26535	0.304641	0.153592	Seven transmembrane MLO family protein
AT1G11020.1	116	120	132	152	163	134	3.66379	-0.207478	0.249745	RING/FYVE/PHD zinc finger superfamily protein
AT1G11040.1	0	0	0	0	0	0	-2.62953	-5.13e-15	1	HSP40/DnaJ peptide-binding protein
AT1G11050.1	117	122	136	137	116	126	3.4838	-0.481065	0.000217375	Protein kinase superfamily protein
AT1G11055.1	3	4	2	2	4	2	-1.19063	-0.638426	0.717847	pseudogene
AT1G11060.1	186	164	168	238	206	215	4.26596	-0.152758	0.281619	WAPL (Wings apart-like protein regulation of heterochromatin) protein
AT1G11070.1	12	13	14	13	27	28	0.230392	0.314591	0.682331	unknown protein
AT1G11080.1	238	269	178	239	171	222	4.02978	-0.633508	0.0061285	serine carboxypeptidase-like 31
AT1G11080.2	225	239	164	215	164	199	3.89744	-0.635986	0.00584464	serine carboxypeptidase-like 31
AT1G11090.1	109	130	157	152	130	166	3.77366	-0.31593	0.0344121	alpha/beta-Hydrolases superfamily protein
AT1G11100.1	39	46	25	50	42	46	1.8814	-0.182997	0.746779	SNF2 domain-containing protein / helicase domain-containing protein / zinc finger protein-related
AT1G11100.2	38	49	28	49	44	48	1.9467	-0.210852	0.64752	SNF2 domain-containing protein / helicase domain-containing protein / zinc finger protein-related
AT1G11110.1	0	0	0	0	0	0	-2.52281	-5.13e-15	1	LisH and RanBPM domains containing protein
AT1G11112.1	12	16	17	19	20	20	0.906351	-0.103991	1	unknown protein
AT1G11120.1	17	28	20	36	27	34	1.35757	0.0789868	0.997493	unknown protein
AT1G11120.2	22	39	32	53	38	47	1.73172	0.0716084	0.962563	unknown protein
AT1G11125.1	12	11	19	16	18	18	0.650229	-0.184187	0.893527	unknown protein
AT1G11130.1	302	330	374	505	409	449	5.24401	-0.0589516	0.715758	Leucine-rich repeat protein kinase family protein
AT1G11145.1	0	1	0	0	0	0	-2.68607	-2.07597	1	Protein of unknown function (DUF674)
AT1G11160.1	66	57	58	105	83	98	2.70375	0.157112	0.658691	Transducin/WD40 repeat-like superfamily protein
AT1G11170.1	38	52	41	38	63	44	1.85468	-0.342683	0.293772	Protein of unknown function (DUF707)
AT1G11170.2	34	53	36	35	59	41	1.75155	-0.354863	0.326543	Protein of unknown function (DUF707)
AT1G11180.1	73	83	102	111	95	81	3.46854	-0.341264	0.052983	Secretory carrier membrane protein (SCAMP) family protein
AT1G11180.2	65	78	96	103	90	75	3.35775	-0.328841	0.0870778	Secretory carrier membrane protein (SCAMP) family protein
AT1G11190.1	68	92	79	80	86	87	2.89063	-0.41202	0.060508	bifunctional nuclease i
AT1G11200.1	97	106	102	162	123	139	3.57054	-0.0238339	1	Protein of unknown function (DUF300)
AT1G11210.1	10	12	14	5	11	16	1.13526	-0.654963	0.255196	Protein of unknown function (DUF761)
AT1G11220.1	16	22	22	47	42	42	1.57467	0.628343	0.0487295	Protein of unknown function (DUF761)
AT1G11230.1	0	0	0	0	0	0	-2.71531	-5.13e-15	1	Protein of unknown function (DUF761)
AT1G11230.2	0	0	0	0	0	0	-2.71531	-5.13e-15	1	Protein of unknown function (DUF761)
AT1G11240.1	197	234	215	384	343	335	4.88012	0.21932	0.0488786	unknown protein
AT1G11250.1	0	0	2	3	2	2	-1.95497	1.19183	0.505367	syntaxin of plants 125
AT1G11260.1	792	731	714	608	509	588	5.97898	-0.897867	8.54e-23	sugar transporter 1
AT1G11270.1	28	42	33	54	50	57	2.14211	0.147448	0.726644	F-box and associated interaction domains-containing protein
AT1G11270.2	34	35	35	54	50	52	2.2311	0.087814	0.914401	F-box and associated interaction domains-containing protein
AT1G11270.3	30	29	27	48	31	42	1.93589	-0.00796758	1	F-box and associated interaction domains-containing protein
AT1G11280.1	294	302	350	397	360	421	5.12506	-0.179453	0.0692506	S-locus lectin protein kinase family protein
AT1G11280.2	300	304	361	412	371	435	5.15293	-0.15983	0.11597	S-locus lectin protein kinase family protein
AT1G11280.3	279	293	342	392	352	421	5.08648	-0.145482	0.176417	S-locus lectin protein kinase family protein
AT1G11280.4	273	291	331	377	341	407	5.05729	-0.165731	0.110714	S-locus lectin protein kinase family protein
AT1G11290.1	44	61	62	95	68	72	2.70342	-0.00456373	1	Pentatricopeptide repeat (PPR) superfamily protein
AT1G11300.1	143	164	150	183	153	189	4.06055	-0.298225	0.02457	protein serine/threonine kinases;protein kinases;ATP binding;sugar binding;kinases;carbohydrate binding
AT1G11310.1	950	959	964	1265	1072	1119	6.55249	-0.23632	0.01505	Seven transmembrane MLO family protein
AT1G11310.2	890	896	914	1183	1006	1054	6.466	-0.23795	0.0172669	Seven transmembrane MLO family protein
AT1G11320.1	30	38	51	49	43	63	2.22397	-0.111015	0.843167	unknown protein
AT1G11330.1	147	176	199	208	156	167	3.86903	-0.471648	0.00115695	S-locus lectin protein kinase family protein
AT1G11330.2	152	177	205	218	160	172	3.89405	-0.454096	0.00152022	S-locus lectin protein kinase family protein
AT1G11340.1	22	23	17	12	18	15	1.17906	-0.952603	0.00716646	S-locus lectin protein kinase family protein
AT1G11350.1	149	130	172	228	208	229	4.18536	0.0640211	0.765495	S-domain-1 13
AT1G11360.1	191	215	198	251	256	243	4.44627	-0.184443	0.162266	Adenine nucleotide alpha hydrolases-like superfamily protein
AT1G11360.2	170	195	183	230	218	205	4.27836	-0.244228	0.056789	Adenine nucleotide alpha hydrolases-like superfamily protein
AT1G11360.3	183	210	189	249	245	221	4.38141	-0.200595	0.151619	Adenine nucleotide alpha hydrolases-like superfamily protein
AT1G11360.4	179	202	187	238	228	216	4.33834	-0.233616	0.0711997	Adenine nucleotide alpha hydrolases-like superfamily protein
AT1G11370.1	0	0	0	0	0	0	-2.62964	-5.13e-15	1	Pectin lyase-like superfamily protein
AT1G11380.1	67	55	77	85	69	91	2.86834	-0.196394	0.367774	PLAC8 family protein
AT1G11390.1	158	174	176	330	269	318	4.36005	0.353889	0.00119474	Protein kinase superfamily protein
AT1G11400.1	140	146	195	208	184	198	4.12947	-0.200498	0.114681	partner of Y14-MAGO
AT1G11400.2	159	157	210	228	206	203	4.25041	-0.21895	0.0744786	partner of Y14-MAGO
AT1G11400.3	133	143	191	198	174	182	4.06589	-0.24858	0.0493376	partner of Y14-MAGO
AT1G11410.1	298	303	390	330	328	299	5.1023	-0.542453	7.98e-08	S-locus lectin protein kinase family protein
AT1G11420.1	51	50	61	98	76	91	2.51032	0.211999	0.425759	DOMAIN OF UNKNOWN FUNCTION 724 2
AT1G11430.1	747	802	926	1493	1331	1426	6.83075	0.285128	0.000311623	plastid developmental protein DAG, putative
AT1G11440.1	105	110	143	159	114	153	3.55257	-0.245389	0.131654	unknown protein
AT1G11450.1	75	86	99	65	68	77	3.00955	-0.80105	2.2e-06	nodulin MtN21 /EamA-like transporter family protein
AT1G11450.2	63	69	83	47	55	58	2.73035	-0.918947	3.35e-07	nodulin MtN21 /EamA-like transporter family protein
AT1G11460.1	10	9	12	14	9	16	0.655951	-0.163815	0.915704	nodulin MtN21 /EamA-like transporter family protein
AT1G11475.1	217	195	227	289	288	284	4.75094	-0.066481	0.750102	RNA polymerases N / 8 kDa subunit
AT1G11480.1	469	484	541	862	750	770	5.82922	0.175508	0.0626998	eukaryotic translation initiation factor-related
AT1G11480.2	452	468	510	832	728	742	5.77864	0.188944	0.0462727	eukaryotic translation initiation factor-related
AT1G11482.1	0	1	0	2	3	2	-2.0629	2.00886	0.277699	pseudogene
AT1G11490.1	5	1	2	7	1	5	-1.12049	0.184383	1	zinc finger (C2H2 type) family protein
AT1G11500.1	3	4	1	4	3	6	-0.981284	0.193223	1	Protein of unknown function (DUF1218)
AT1G11510.1	0	0	0	0	0	0	-2.68614	-5.13e-15	1	DNA-binding storekeeper protein-related transcriptional regulator
AT1G11520.1	2	3	3	3	7	6	-1.02583	0.491284	0.776538	pliceosome associated protein-related
AT1G11530.1	113	92	126	90	74	78	3.29752	-0.948114	7.78e-10	C-terminal cysteine residue is changed to a serine 1
AT1G11540.1	16	19	11	29	25	28	0.738617	0.332329	0.541476	Sulfite exporter TauE/SafE family protein
AT1G11545.1	195	194	185	436	321	401	4.52117	0.505336	0.00143033	xyloglucan endotransglucosylase/hydrolase 8
AT1G11560.1	1	0	1	2	0	0	-2.30759	-0.42145	1	Oligosaccharyltransferase complex/magnesium transporter family protein
AT1G11570.1	6	4	6	12	9	7	-0.429089	0.304131	0.779753	NTF2-like
AT1G11570.2	6	4	8	13	9	11	-0.12586	0.371943	0.72826	NTF2-like
AT1G11572.1	2	1	2	0	0	0	-2.28538	-4.09386	0.0951826	Plant thionin family protein
AT1G11580.1	979	1093	1064	1857	1349	1538	6.68113	0.090962	0.731122	methylesterase PCR A
AT1G11590.1	4	1	7	3	1	7	-1.14992	-0.600776	0.650815	Plant invertase/pectin methylesterase inhibitor superfamily
AT1G11600.1	121	152	137	280	246	240	4.60942	0.40366	0.00289899	cytochrome P450, family 77, subfamily B, polypeptide 1
AT1G11608.1	0	0	0	0	0	0	-2.71529	-5.13e-15	1	F-box associated ubiquitination effector family protein
AT1G11610.1	13	25	8	13	9	15	0.184335	-0.821131	0.236776	cytochrome P450, family 71, subfamily A, polypeptide 18
AT1G11610.2	13	25	8	13	9	15	0.184335	-0.82113	0.236776	cytochrome P450, family 71, subfamily A, polypeptide 18
AT1G11620.1	0	0	0	0	0	0	-2.65756	-5.13e-15	1	F-box and associated interaction domains-containing protein
AT1G11630.1	68	66	89	109	91	110	3.20298	-0.0208959	1	Tetratricopeptide repeat (TPR)-like superfamily protein
AT1G11650.1	1530	1655	1904	2634	2394	2550	7.6624	0.0801101	0.231049	RNA-binding (RRM/RBD/RNP motifs) family protein
AT1G11650.2	1655	1804	2062	2864	2571	2740	7.77596	0.0717142	0.295347	RNA-binding (RRM/RBD/RNP motifs) family protein
AT1G11655.1	2	3	3	11	6	7	-1.27348	1.05689	0.265442	unknown protein
AT1G11660.1	406	414	482	788	613	695	5.59099	0.187894	0.0664052	heat shock protein 70 (Hsp 70) family protein
AT1G11670.1	255	219	221	576	447	490	4.78097	0.613052	3.83e-05	MATE efflux family protein
AT1G11680.1	723	801	794	1542	1193	1242	6.47879	0.276359	0.000764395	CYTOCHROME P450 51G1
AT1G11684.1	0	0	0	0	0	0	-2.65761	-5.13e-15	1	unknown protein
AT1G11690.1	0	2	1	0	0	1	-2.18031	-1.69584	0.843101	unknown protein
AT1G11700.1	230	216	217	338	305	262	4.69031	-0.0519373	0.826812	Protein of unknown function, DUF584
AT1G11710.1	40	38	50	61	54	63	2.41742	-0.020277	1	Pentatricopeptide repeat (PPR) superfamily protein
AT1G11720.1	718	777	916	1113	931	988	6.36841	-0.165021	0.0425727	starch synthase 3
AT1G11720.2	731	791	929	1131	944	1005	6.39235	-0.166264	0.0358148	starch synthase 3
AT1G11730.1	31	13	31	25	25	26	1.42875	-0.475175	0.232617	Galactosyltransferase family protein
AT1G11735.1	1	0	1	2	2	1	-2.04457	0.738346	0.890036	MIR171B; miRNA
AT1G11740.1	12	15	15	32	22	15	0.532287	0.214567	0.793679	ankyrin repeat family protein
AT1G11750.1	690	731	885	1292	1133	1232	6.50523	0.170791	0.0261891	CLP protease proteolytic subunit 6
AT1G11750.2	658	697	853	1232	1076	1174	6.43109	0.162868	0.0375005	CLP protease proteolytic subunit 6
AT1G11755.1	74	74	88	124	108	124	3.33891	0.0964552	0.694309	Undecaprenyl pyrophosphate synthetase family protein
AT1G11760.1	51	59	62	71	67	69	2.68644	-0.227949	0.402799	unknown protein
AT1G11770.1	0	0	0	0	1	0	-2.57509	1.71531	1	FAD-binding Berberine family protein
AT1G11780.1	97	103	134	196	189	167	3.84249	0.230296	0.11681	oxidoreductase, 2OG-Fe(II) oxygenase family protein
AT1G11785.1	1	5	2	0	4	0	-1.80591	-1.39689	0.320495	unknown protein
AT1G11790.1	235	327	311	431	423	418	5.0889	0.0492282	0.767674	arogenate dehydratase 1
AT1G11790.2	219	301	294	401	397	392	4.98653	0.0541235	0.728052	arogenate dehydratase 1
AT1G11800.1	65	67	58	92	102	111	3.12969	0.185332	0.464524	endonuclease/exonuclease/phosphatase family protein
AT1G11810.1	0	0	0	0	0	0	-2.60218	-5.13e-15	1	F-box associated ubiquitination effector family protein
AT1G11820.1	312	336	392	586	532	548	5.5108	0.184827	0.0595688	O-Glycosyl hydrolases family 17 protein
AT1G11820.2	421	427	486	730	670	687	5.87163	0.149406	0.120923	O-Glycosyl hydrolases family 17 protein
AT1G11840.1	3418	3794	4113	5861	5171	5311	8.74563	0.0329663	0.735706	glyoxalase I homolog
AT1G11840.2	3478	3886	4202	5956	5290	5409	8.77166	0.0301857	0.772781	glyoxalase I homolog
AT1G11840.3	3374	3762	4067	5771	5101	5223	8.72915	0.0266249	0.815151	glyoxalase I homolog
AT1G11840.4	3392	3774	4087	5797	5125	5252	8.7352	0.0272666	0.808644	glyoxalase I homolog
AT1G11840.5	3098	3516	3762	5407	4814	4945	8.61992	0.0519001	0.526092	glyoxalase I homolog
AT1G11840.6	3395	3778	4088	5807	5132	5260	8.73677	0.0284336	0.793206	glyoxalase I homolog
AT1G11850.1	176	208	246	277	339	304	4.62859	0.0610091	0.838803	unknown protein
AT1G11850.2	178	213	251	281	344	309	4.65209	0.0557716	0.855595	unknown protein
AT1G11850.3	172	206	240	274	331	296	4.58124	0.0580633	0.845183	unknown protein
AT1G11850.4	177	208	247	276	339	304	4.62926	0.0550024	0.864314	unknown protein
AT1G11860.1	11737	12680	14608	19204	16873	17697	10.4981	-0.0321103	0.814439	Glycine cleavage T-protein family
AT1G11860.2	11343	12245	14111	18566	16307	17075	10.452	-0.0321102	0.816766	Glycine cleavage T-protein family
AT1G11860.3	10537	11414	13169	17394	15170	15930	10.3415	-0.0291765	0.847349	Glycine cleavage T-protein family
AT1G11870.1	197	230	265	429	352	382	4.93168	0.25285	0.0102625	Seryl-tRNA synthetase
AT1G11870.2	206	238	279	440	368	400	4.97933	0.244718	0.0103479	Seryl-tRNA synthetase
AT1G11870.3	191	227	255	415	349	382	4.87845	0.271912	0.00520046	Seryl-tRNA synthetase
AT1G11880.1	49	61	58	79	82	85	2.5008	0.0544013	0.962556	transferases, transferring hexosyl groups
AT1G11890.1	291	311	374	471	411	449	5.12841	-0.0480126	0.748862	Synaptobrevin family protein
AT1G11900.1	38	17	44	28	26	37	1.67101	-0.613883	0.0585941	Tetratricopeptide repeat (TPR)-like superfamily protein
AT1G11905.1	90	100	104	115	144	136	3.40266	-0.0658278	0.884822	B-cell receptor-associated protein 31-like
AT1G11905.2	47	56	50	49	78	72	2.45694	-0.110693	0.840202	B-cell receptor-associated protein 31-like
AT1G11910.1	4351	4735	4948	6875	6066	6295	8.86246	-0.0434762	0.690447	aspartic proteinase A1
AT1G11915.1	8	10	10	18	11	12	0.254266	0.051574	1	unknown protein
AT1G11920.1	0	1	1	2	0	0	-2.35276	-0.420191	1	Pectin lyase-like superfamily protein
AT1G11925.1	0	0	0	0	0	0	-2.68613	-5.13e-15	1	Stigma-specific Stig1 family protein
AT1G11930.1	403	418	510	554	524	521	5.55146	-0.229193	0.0109782	Predicted pyridoxal phosphate-dependent enzyme, YBL036C type
AT1G11930.2	454	491	556	631	602	584	5.73651	-0.218959	0.00925688	Predicted pyridoxal phosphate-dependent enzyme, YBL036C type
AT1G11940.1	54	65	60	75	87	78	2.69101	-0.0717929	0.895035	Core-2/I-branching beta-1,6-N-acetylglucosaminyltransferase family protein
AT1G11950.1	67	66	73	114	79	115	2.90046	0.0816708	0.839358	Transcription factor jumonji (jmjC) domain-containing protein
AT1G11960.1	102	111	97	148	140	148	3.48601	-0.00630522	1	ERD (early-responsive to dehydration stress) family protein
AT1G11990.1	4	4	1	2	3	8	-1.65676	0.0263461	1	O-fucosyltransferase family protein
AT1G12000.1	1128	1254	1206	2949	2442	2585	7.24038	0.650035	1.01e-13	Phosphofructokinase family protein
AT1G12010.1	138	125	138	139	117	133	3.00729	-0.545676	0.0148151	2-oxoglutarate (2OG) and Fe(II)-dependent oxygenase superfamily protein
AT1G12020.1	52	58	72	108	95	111	3.24226	0.29065	0.122827	unknown protein
AT1G12030.1	9	5	6	26	19	24	0.536454	1.27218	0.00606241	Protein of unknown function (DUF506)
AT1G12040.1	30	46	32	141	125	186	2.32648	1.56309	4.36e-07	leucine-rich repeat/extensin 1
AT1G12050.1	398	402	478	634	567	597	5.62829	-0.00348486	1	fumarylacetoacetase, putative
AT1G12060.1	21	28	38	46	47	34	1.69579	0.0534914	1	BCL-2-associated athanogene 5
AT1G12064.1	0	0	0	5	1	1	-2.02609	4.07669	0.0993083	unknown protein
AT1G12070.1	0	1	4	5	3	6	-1.29642	0.953518	0.481351	Immunoglobulin E-set superfamily protein
AT1G12080.1	177	154	174	399	391	378	4.78024	0.71026	5.79e-05	Vacuolar calcium-binding protein-related
AT1G12080.2	297	252	295	636	582	591	5.43737	0.598452	0.00068873	Vacuolar calcium-binding protein-related
AT1G12090.1	2703	3456	3849	4346	4291	4623	9.06505	-0.0804883	0.552815	extensin-like protein
AT1G12100.1	4	5	1	7	2	3	-0.879296	-0.236034	1	Bifunctional inhibitor/lipid-transfer protein/seed storage 2S albumin superfamily protein
AT1G12110.1	1591	1916	1670	3237	2846	2754	7.34259	0.268969	0.293467	nitrate transporter 1.1
AT1G12120.1	405	455	463	517	504	530	5.59048	-0.266501	0.000658201	Plant protein of unknown function (DUF863)
AT1G12130.1	8	9	3	6	3	6	-0.910529	-0.901557	0.207337	Flavin-binding monooxygenase family protein
AT1G12140.1	397	352	431	635	571	640	5.46744	0.148072	0.146624	flavin-monooxygenase glucosinolate S-oxygenase 5
AT1G12140.2	382	334	411	610	535	601	5.39581	0.133249	0.244133	flavin-monooxygenase glucosinolate S-oxygenase 5
AT1G12150.1	13	13	6	17	31	29	0.800601	0.765072	0.101336	Plant protein of unknown function (DUF827)
AT1G12160.1	42	49	43	123	85	91	2.35606	0.649847	0.0460095	Flavin-binding monooxygenase family protein
AT1G12200.1	211	304	234	544	417	473	4.75358	0.433344	0.00929548	Flavin-binding monooxygenase family protein
AT1G12210.1	31	29	39	48	33	44	1.83521	-0.16056	0.700728	RPS5-like 1
AT1G12211.1	0	0	0	0	0	0	-2.71528	-5.13e-15	1	unknown protein
AT1G12220.1	86	84	106	94	73	99	3.05715	-0.549246	0.00141543	Disease resistance protein (CC-NBS-LRR class) family
AT1G12220.2	87	85	105	97	74	101	3.07545	-0.522743	0.00177205	Disease resistance protein (CC-NBS-LRR class) family
AT1G12230.1	687	760	842	1279	1092	1211	6.43875	0.149629	0.074923	Aldolase superfamily protein
AT1G12230.2	661	732	818	1227	1059	1169	6.39187	0.148084	0.0866658	Aldolase superfamily protein
AT1G12240.1	1401	1354	1554	2071	1714	1990	7.09399	-0.0775294	0.419419	Glycosyl hydrolases family 32 protein
AT1G12244.1	74	86	117	106	125	108	3.32987	-0.194519	0.449924	Polynucleotidyl transferase, ribonuclease H-like superfamily protein
AT1G12250.1	456	477	560	368	373	409	5.51367	-0.868988	1.15e-18	Pentapeptide repeat-containing protein
AT1G12250.2	432	457	534	352	354	391	5.44992	-0.867899	6.51e-19	Pentapeptide repeat-containing protein
AT1G12260.1	47	39	63	62	48	49	2.12739	-0.401339	0.0933402	NAC 007
AT1G12270.1	432	524	513	923	773	854	5.9826	0.297694	0.000288223	stress-inducible protein, putative
AT1G12280.1	118	120	160	154	135	136	3.44275	-0.399976	0.00369972	LRR and NB-ARC domains-containing disease resistance protein
AT1G12290.1	50	39	48	58	49	55	2.17818	-0.255652	0.336117	Disease resistance protein (CC-NBS-LRR class) family
AT1G12290.2	52	39	49	58	51	58	2.25137	-0.243028	0.373546	Disease resistance protein (CC-NBS-LRR class) family
AT1G12294.1	1	0	1	0	0	0	-2.37566	-2.89315	0.726644	MIR472a; miRNA
AT1G12300.1	70	65	74	97	106	85	2.90459	-0.0332132	1	Tetratricopeptide repeat (TPR)-like superfamily protein
AT1G12310.1	547	569	587	948	833	847	6.11654	0.12677	0.186333	Calcium-binding EF-hand family protein
AT1G12320.1	102	87	109	72	67	69	3.45928	-1.01434	1.79e-10	Protein of unknown function (DUF1442)
AT1G12330.1	166	198	203	250	224	252	4.57087	-0.13948	0.291386	unknown protein
AT1G12340.1	45	39	45	59	53	64	2.3504	-0.0486738	0.99457	Cornichon family protein
AT1G12350.1	132	153	179	205	196	206	4.0961	-0.106895	0.55297	4-phospho-panto-thenoylcysteine synthetase
AT1G12360.1	579	540	585	782	698	672	5.78951	-0.164064	0.135088	Sec1/munc18-like (SM) proteins superfamily
AT1G12370.1	113	139	119	188	162	214	3.74368	0.1055	0.638315	photolyase 1
AT1G12370.2	122	161	128	203	173	226	3.86371	0.051304	0.897849	photolyase 1
AT1G12380.1	127	153	162	251	202	228	3.94704	0.126701	0.40228	unknown protein
AT1G12390.1	114	101	123	162	153	163	3.64474	0.00341708	1	Cornichon family protein
AT1G12400.1	43	42	53	83	79	71	2.43693	0.259202	0.271527	Nucleotide excision repair, TFIIH, subunit TTDA
AT1G12410.1	1098	1160	1443	1825	1609	1578	7.1253	-0.0557898	0.592989	CLP protease proteolytic subunit 2
AT1G12420.1	105	120	117	142	149	162	3.46409	-0.089768	0.730945	ACT domain repeat 8
AT1G12430.1	271	278	321	413	383	383	4.91323	-0.0572814	0.727017	armadillo repeat kinesin 3
AT1G12430.2	270	272	314	413	377	375	4.8761	-0.0516296	0.762642	armadillo repeat kinesin 3
AT1G12440.1	448	467	486	533	485	535	5.56626	-0.34923	5.08e-05	A20/AN1-like zinc finger family protein
AT1G12440.2	425	442	450	505	455	496	5.47731	-0.353688	4.12e-05	A20/AN1-like zinc finger family protein
AT1G12450.1	60	59	66	62	59	75	2.50336	-0.412376	0.0476322	SNARE associated Golgi protein family
AT1G12460.1	172	177	224	269	228	267	4.31708	-0.0803839	0.658185	Leucine-rich repeat protein kinase family protein
AT1G12470.1	455	521	504	735	600	664	5.65051	-0.0662813	0.614271	zinc ion binding
AT1G12480.1	41	44	27	32	45	45	2.14616	-0.375351	0.28362	C4-dicarboxylate transporter/malic acid transport protein
AT1G12490.1	0	1	3	0	0	0	-2.37569	-3.78609	0.276866	F-box associated ubiquitination effector family protein
AT1G12500.1	342	396	455	617	539	637	5.55125	0.0933858	0.408654	Nucleotide-sugar transporter family protein
AT1G12520.1	168	188	191	218	195	190	4.2052	-0.356002	0.000915703	copper chaperone for SOD1
AT1G12520.2	174	193	198	219	199	193	4.24343	-0.383598	0.000295299	copper chaperone for SOD1
AT1G12520.3	159	177	173	199	185	176	4.1008	-0.359031	0.0018598	copper chaperone for SOD1
AT1G12530.1	125	129	135	193	174	165	3.79914	-0.0458282	0.895932	unknown protein
AT1G12540.1	0	0	0	0	0	0	-2.71531	-5.13e-15	1	basic helix-loop-helix (bHLH) DNA-binding superfamily protein
AT1G12550.1	46	43	62	46	69	48	2.45174	-0.379693	0.135854	D-isomer specific 2-hydroxyacid dehydrogenase family protein
AT1G12560.1	62	66	41	180	176	244	2.89243	1.31752	1.57e-06	expansin A7
AT1G12570.1	75	73	84	74	57	59	3.24785	-0.785563	6.48e-05	Glucose-methanol-choline (GMC) oxidoreductase family protein
AT1G12580.1	279	335	347	472	412	429	5.13169	-0.0460186	0.762494	phosphoenolpyruvate carboxylase-related kinase 1
AT1G12600.1	4	10	6	9	3	7	-0.56129	-0.562645	0.588741	UDP-N-acetylglucosamine (UAA) transporter family
AT1G12610.1	0	0	0	0	1	0	-2.68613	1.71586	1	Integrase-type DNA-binding superfamily protein
AT1G12620.1	58	68	79	97	114	97	2.94203	0.0937976	0.741569	Pentatricopeptide repeat (PPR) superfamily protein
AT1G12630.1	1	0	3	2	1	3	-1.14076	0.0830799	1	Integrase-type DNA-binding superfamily protein
AT1G12640.1	326	351	374	521	422	475	4.9936	-0.0671025	0.719276	MBOAT (membrane bound O-acyl transferase) family protein
AT1G12650.1	188	196	209	331	295	312	4.58949	0.163891	0.277189	unknown protein
AT1G12650.2	194	205	217	340	310	328	4.63533	0.169748	0.242993	unknown protein
AT1G12650.3	190	195	210	331	297	313	4.59168	0.163672	0.273288	unknown protein
AT1G12650.4	174	176	187	286	264	277	4.40655	0.1253	0.477681	unknown protein
AT1G12665.1	0	0	0	0	0	0	-2.71529	-5.13e-15	1	unknown protein
AT1G12670.1	0	1	0	0	0	0	-2.57513	-2.07578	1	pseudogene
AT1G12672.1	1	2	0	2	1	1	-2.37552	-0.0771344	1	unknown protein
AT1G12672.2	1	2	0	4	3	1	-2.24223	0.849873	0.779651	unknown protein
AT1G12680.1	184	184	219	233	214	213	4.41141	-0.326761	0.00346727	phosphoenolpyruvate carboxylase-related kinase 2
AT1G12700.1	34	41	39	56	55	49	2.40812	-0.00707775	1	ATP binding;nucleic acid binding;helicases
AT1G12710.1	39	52	53	55	62	61	2.28501	-0.187721	0.528772	phloem protein 2-A12
AT1G12730.1	49	52	43	50	66	78	2.65538	-0.0658445	0.952691	GPI transamidase subunit PIG-U
AT1G12730.2	46	49	43	49	64	73	2.57705	-0.0643994	0.966398	GPI transamidase subunit PIG-U
AT1G12740.1	58	67	79	148	113	153	2.95439	0.524928	0.161001	cytochrome P450, family 87, subfamily A, polypeptide 2
AT1G12740.2	55	65	79	143	108	146	2.90076	0.501585	0.176676	cytochrome P450, family 87, subfamily A, polypeptide 2
AT1G12750.1	130	143	195	206	175	203	4.40968	-0.173069	0.317533	RHOMBOID-like protein 6
AT1G12750.2	149	158	207	224	189	216	4.517	-0.202962	0.161883	RHOMBOID-like protein 6
AT1G12750.3	154	163	214	233	197	222	4.55139	-0.198047	0.17401	RHOMBOID-like protein 6
AT1G12760.1	427	429	471	554	515	523	5.50402	-0.234274	0.00528344	Zinc finger, C3HC4 type (RING finger) family protein
AT1G12760.2	404	413	434	522	488	498	5.43429	-0.227826	0.00878438	Zinc finger, C3HC4 type (RING finger) family protein
AT1G12770.1	378	434	485	811	666	659	5.77087	0.223198	0.0323221	P-loop containing nucleoside triphosphate hydrolases superfamily protein
AT1G12775.1	45	39	44	67	68	72	2.31111	0.196261	0.525987	Pentatricopeptide repeat (PPR) superfamily protein
AT1G12780.1	353	377	400	353	291	306	5.03444	-0.748869	2.17e-14	UDP-D-glucose/UDP-D-galactose 4-epimerase 1
AT1G12790.1	27	30	26	37	35	25	1.60722	-0.271952	0.484788	unknown protein
AT1G12800.1	2483	2707	3147	3824	3390	3673	8.26085	-0.10881	0.182237	Nucleic acid-binding, OB-fold-like protein
AT1G12805.1	7	5	1	4	1	1	-0.63518	-1.59559	0.243899	nucleotide binding
AT1G12810.1	131	144	148	181	168	199	3.97924	-0.12292	0.476015	proline-rich family protein
AT1G12810.2	110	128	125	148	144	172	3.7469	-0.141783	0.454588	proline-rich family protein
AT1G12820.1	506	502	573	685	607	625	5.72309	-0.21916	0.00494934	auxin signaling F-box 3
AT1G12830.1	118	162	165	225	185	233	4.16332	0.0354802	0.947012	unknown protein
AT1G12840.1	1385	1399	1597	2482	2046	2314	7.34588	0.14427	0.042223	vacuolar ATP synthase subunit C (VATC) / V-ATPase C subunit / vacuolar proton pump C subunit (DET3)
AT1G12845.1	36	57	60	71	95	84	3.48427	0.222113	0.447286	unknown protein
AT1G12850.1	317	306	378	523	489	510	5.31399	0.10932	0.343612	Phosphoglycerate mutase family protein
AT1G12855.1	1	4	3	0	0	2	-1.67154	-2.26415	0.169023	F-box family protein
AT1G12860.1	292	332	372	460	389	421	5.33478	-0.145248	0.2087	basic helix-loop-helix (bHLH) DNA-binding superfamily protein
AT1G12870.1	0	1	0	0	0	0	-2.68602	-2.07596	1	F-box and associated interaction domains-containing protein
AT1G12880.1	72	72	103	118	103	80	3.14238	-0.209143	0.333669	nudix hydrolase homolog 12
AT1G12890.1	1	1	0	0	2	1	-1.8066	0.0774617	1	Integrase-type DNA-binding superfamily protein
AT1G12900.1	13795	14520	17198	20264	17849	19524	10.5853	-0.15351	0.0513289	glyceraldehyde 3-phosphate dehydrogenase A subunit 2
AT1G12900.2	12923	13639	16181	19085	16824	18385	10.4982	-0.148922	0.0616642	glyceraldehyde 3-phosphate dehydrogenase A subunit 2
AT1G12900.3	13242	13891	16520	19378	17088	18599	10.5274	-0.159098	0.0435835	glyceraldehyde 3-phosphate dehydrogenase A subunit 2
AT1G12900.4	12275	12949	15429	18120	15950	17405	10.4152	-0.153393	0.055854	glyceraldehyde 3-phosphate dehydrogenase A subunit 2
AT1G12910.1	192	170	200	256	235	259	4.38786	-0.0809756	0.634413	Transducin/WD40 repeat-like superfamily protein
AT1G12920.1	688	729	842	1509	1289	1392	6.58265	0.394794	3.13e-11	eukaryotic release factor 1-2
AT1G12930.1	237	253	283	394	308	326	4.72567	-0.0862695	0.490622	ARM repeat superfamily protein
AT1G12940.1	0	1	1	0	0	0	-2.18039	-2.89154	0.726644	nitrate transporter2.5
AT1G12950.1	31	34	29	74	69	74	1.79221	0.704138	0.0595676	root hair specific 2
AT1G12960.1	1	0	0	0	0	0	-2.71517	-2.07981	1	Ribosomal protein L18e/L15 superfamily protein
AT1G12970.1	79	64	58	80	89	82	2.73447	-0.178468	0.471392	plant intracellular ras group-related LRR 3
AT1G12980.1	0	0	0	0	4	0	-1.88711	3.34599	0.278131	Integrase-type DNA-binding superfamily protein
AT1G12990.1	141	145	192	233	206	251	4.3502	0.0345755	0.924715	beta-1,4-N-acetylglucosaminyltransferase family protein
AT1G13000.1	128	127	165	207	168	220	3.9704	0.00651412	1	Protein of unknown function (DUF707)
AT1G13000.2	134	132	171	218	174	218	3.99728	-0.0151917	1	Protein of unknown function (DUF707)
AT1G13020.1	381	396	437	729	611	679	5.4968	0.236048	0.00337465	eukaryotic initiation factor 4B2
AT1G13030.1	101	114	110	218	175	172	4.03287	0.298829	0.0454955	sphere organelles protein-related
AT1G13040.1	28	26	37	60	50	49	2.02056	0.308059	0.333273	Pentatricopeptide repeat (PPR-like) superfamily protein
AT1G13050.1	22	26	34	46	31	40	2.10092	0.0162669	1	unknown protein
AT1G13050.2	22	24	32	47	31	39	2.08588	0.0877363	0.923177	unknown protein
AT1G13060.1	857	916	1005	1573	1323	1351	6.72358	0.114307	0.170962	20S proteasome beta subunit E1
AT1G13060.2	789	844	932	1469	1211	1238	6.62059	0.1128	0.193802	20S proteasome beta subunit E1
AT1G13070.1	0	1	0	0	0	0	-2.57507	-2.07591	1	CYP71B27 (cytochrome P450	family 71	subfamily B	polypeptide 27")"
AT1G13080.1	339	385	400	531	504	547	5.09207	-0.00223667	1	cytochrome P450, family 71, subfamily B, polypeptide 2
AT1G13080.2	318	353	383	478	469	507	4.98585	-0.0299827	0.936837	cytochrome P450, family 71, subfamily B, polypeptide 2
AT1G13090.1	468	532	588	537	517	506	5.68315	-0.519506	8.28e-11	cytochrome P450, family 71, subfamily B, polypeptide 28
AT1G13100.1	77	78	75	92	75	88	2.97676	-0.350266	0.0715725	cytochrome P450, family 71, subfamily B, polypeptide 29
AT1G13110.1	577	515	611	791	613	654	6.11461	-0.229191	0.0228463	cytochrome P450, family 71 subfamily B, polypeptide 7
AT1G13120.1	203	229	250	336	299	291	4.74126	-0.0547638	0.780937	embryo defective 1745
AT1G13130.1	38	33	51	68	45	55	1.93823	-0.0366718	1	Cellulase (glycosyl hydrolase family 5) protein
AT1G13140.1	11	7	9	5	7	6	0.132937	-1.06458	0.110668	cytochrome P450, family 86, subfamily C, polypeptide 3
AT1G13140.2	9	7	8	5	7	6	0.0485656	-0.895447	0.249383	cytochrome P450, family 86, subfamily C, polypeptide 3
AT1G13145.1	16	22	22	26	24	30	1.48442	-0.0798214	0.988427	pseudogene
AT1G13150.1	9	13	16	10	15	10	0.575867	-0.605398	0.258483	cytochrome P450, family 86, subfamily C, polypeptide 4
AT1G13160.1	352	329	363	874	685	767	5.65454	0.653698	6.4e-14	ARM repeat superfamily protein
AT1G13170.1	259	271	294	502	445	463	4.97885	0.27768	0.00628574	OSBP(oxysterol binding protein)-related protein 1D
AT1G13170.2	253	266	291	490	435	446	4.9449	0.262199	0.00968508	OSBP(oxysterol binding protein)-related protein 1D
AT1G13180.1	103	83	96	153	143	151	3.38209	0.166725	0.367704	Actin-like ATPase superfamily protein
AT1G13190.1	269	309	332	410	373	414	4.93258	-0.100015	0.424161	RNA-binding (RRM/RBD/RNP motifs) family protein
AT1G13195.1	70	84	85	105	91	108	2.96118	-0.149258	0.553179	RING/U-box superfamily protein
AT1G13195.2	63	78	76	96	81	100	2.84917	-0.144512	0.611669	RING/U-box superfamily protein
AT1G13200.1	0	0	0	1	0	2	-2.44737	2.96862	0.454148	F-box and associated interaction domains-containing protein
AT1G13210.1	234	264	244	366	271	344	4.53506	-0.102016	0.702857	autoinhibited Ca2+/ATPase II
AT1G13220.1	73	70	123	143	92	113	3.23554	-0.106581	0.726644	nuclear matrix constituent protein-related
AT1G13220.2	270	270	338	439	383	381	5.06457	-0.0414093	0.835094	nuclear matrix constituent protein-related
AT1G13230.1	3	1	6	3	4	4	-0.870879	-0.341083	0.883004	Leucine-rich repeat (LRR) family protein
AT1G13245.1	308	281	350	228	252	227	5.00797	-0.901995	1.83e-12	ROTUNDIFOLIA like 17
AT1G13250.1	128	149	150	246	222	220	4.36279	0.191434	0.199352	galacturonosyltransferase-like 3
AT1G13260.1	83	65	102	99	92	120	3.38921	-0.17877	0.502214	related to ABI3/VP1 1
AT1G13270.1	139	172	215	487	372	465	4.74263	0.837949	4.37e-10	methionine aminopeptidase 1B
AT1G13270.2	126	153	198	443	341	418	4.58691	0.839761	2.48e-10	methionine aminopeptidase 1B
AT1G13280.1	294	246	285	438	322	343	4.99904	-0.0861901	0.63651	allene oxide cyclase 4
AT1G13290.1	0	0	2	0	2	0	-2.18046	-0.411869	1	C2H2-like zinc finger protein
AT1G13300.1	134	126	104	185	150	150	3.69199	-0.0964936	0.797628	myb-like transcription factor family protein
AT1G13310.1	10	14	6	6	7	10	-0.0533908	-0.876948	0.254099	Endosomal targeting BRO1-like domain-containing protein
AT1G13320.1	543	567	645	898	789	833	5.99437	0.0254538	0.894404	protein phosphatase 2A subunit A3
AT1G13320.2	512	531	613	849	748	794	5.90974	0.0336578	0.826922	protein phosphatase 2A subunit A3
AT1G13320.3	531	561	638	879	772	809	5.9686	0.0115786	1	protein phosphatase 2A subunit A3
AT1G13330.1	22	22	27	26	34	41	1.72323	0.0130264	1	Arabidopsis Hop2 homolog
AT1G13340.1	59	62	62	62	58	71	2.39769	-0.435463	0.119572	Regulator of Vps4 activity in the MVB pathway protein
AT1G13350.1	336	379	406	419	397	396	5.3072	-0.382877	2.56e-06	Protein kinase superfamily protein
AT1G13350.2	340	381	409	422	398	399	5.31544	-0.386178	2.32e-06	Protein kinase superfamily protein
AT1G13360.1	494	490	567	759	709	735	6.03168	0.0102566	1	unknown protein
AT1G13360.2	345	339	391	582	499	517	5.5327	0.0743319	0.545164	unknown protein
AT1G13360.3	345	339	391	582	499	517	5.53198	0.0743369	0.544228	unknown protein
AT1G13370.1	4	4	3	5	6	6	-1.072	0.127781	1	Histone superfamily protein
AT1G13380.1	145	198	216	319	286	272	4.48651	0.156952	0.301561	Protein of unknown function (DUF1218)
AT1G13390.1	65	67	81	83	95	97	3.25917	-0.126095	0.647897	unknown protein
AT1G13390.2	99	88	120	104	141	126	3.66996	-0.21694	0.29625	unknown protein
AT1G13400.1	1	1	0	2	2	3	-1.13081	1.18913	0.732993	C2H2 and C2HC zinc fingers superfamily protein
AT1G13410.1	14	14	13	25	25	35	1.23011	0.551724	0.169896	Tetratricopeptide repeat (TPR)-like superfamily protein
AT1G13420.1	63	64	60	215	173	196	2.79919	1.13487	0.0032576	sulfotransferase 4B
AT1G13430.1	20	21	21	49	30	33	1.22584	0.351383	0.358823	sulfotransferase 4C
AT1G13440.1	12394	12775	14643	24904	20385	20895	10.73	0.234244	0.000188463	glyceraldehyde-3-phosphate dehydrogenase C2
AT1G13440.2	10788	11046	12633	21535	17615	18026	10.532	0.230782	0.000301004	glyceraldehyde-3-phosphate dehydrogenase C2
AT1G13450.1	199	229	204	219	226	221	4.36396	-0.421406	0.000450577	Homeodomain-like superfamily protein
AT1G13450.2	186	205	189	193	204	201	4.22787	-0.452539	8.74e-05	Homeodomain-like superfamily protein
AT1G13450.3	199	220	196	215	216	216	4.33501	-0.424632	0.000266219	Homeodomain-like superfamily protein
AT1G13460.1	220	205	225	271	241	278	4.43084	-0.2169	0.0725036	Protein phosphatase 2A regulatory B subunit family protein
AT1G13460.2	223	206	232	273	249	268	4.43069	-0.24047	0.0355699	Protein phosphatase 2A regulatory B subunit family protein
AT1G13470.1	3	1	5	4	1	1	-1.75996	-1.0295	0.547542	Protein of unknown function (DUF1262)
AT1G13480.1	17	22	14	11	15	11	0.566132	-1.00845	0.044336	Protein of unknown function (DUF1262)
AT1G13490.1	1	2	4	2	0	0	-1.82195	-2.07891	0.11646	Protein of unknown function (DUF1262)
AT1G13500.1	9	6	5	7	12	13	-0.357691	0.178503	0.972538	Protein of unknown function (DUF1262)
AT1G13510.1	36	38	22	49	46	42	1.42769	-0.00260742	1	Protein of unknown function (DUF1262)
AT1G13520.1	72	110	66	77	88	126	3.05752	-0.268671	0.700838	Protein of unknown function (DUF1262)
AT1G13530.1	37	47	18	23	16	32	1.26698	-1.04282	0.0543853	Protein of unknown function (DUF1262)
AT1G13540.1	16	14	18	14	11	7	0.155664	-1.07221	0.0129139	Protein of unknown function (DUF1262)
AT1G13550.1	7	13	7	8	5	11	-0.404169	-0.661622	0.372499	Protein of unknown function (DUF1262)
AT1G13560.1	595	626	683	942	781	863	6.22969	-0.0564528	0.569493	aminoalcoholphosphotransferase 1
AT1G13560.2	558	593	639	893	738	814	6.14844	-0.0483851	0.660422	aminoalcoholphosphotransferase 1
AT1G13570.1	123	108	121	146	140	180	3.71838	-0.0928783	0.702505	F-box/RNI-like superfamily protein
AT1G13580.1	97	93	107	150	128	107	3.37524	-0.123642	0.614475	LAG1 longevity assurance homolog 3
AT1G13580.2	104	105	115	166	139	118	3.47028	-0.113555	0.60794	LAG1 longevity assurance homolog 3
AT1G13580.3	104	108	116	168	142	119	3.47702	-0.11071	0.625139	LAG1 longevity assurance homolog 3
AT1G13590.1	22	36	24	49	48	45	1.59424	0.293975	0.499524	phytosulfokine 1 precursor
AT1G13600.1	27	27	19	34	33	44	1.35948	0.104702	0.927853	basic leucine-zipper 58
AT1G13605.1	0	0	0	0	0	0	-2.57516	-5.13e-15	1	unknown protein
AT1G13607.1	0	0	0	0	0	0	-2.65759	-5.13e-15	1	Defensin-like (DEFL) family protein
AT1G13608.1	0	0	0	2	0	0	-2.35285	2.47096	0.726644	Defensin-like (DEFL) family protein
AT1G13609.1	2	1	5	10	3	12	1.29571	1.11699	0.292358	Defensin-like (DEFL) family protein
AT1G13609.2	1	2	4	7	2	7	0.773316	0.672184	0.635866	Defensin-like (DEFL) family protein
AT1G13610.1	6	10	6	8	8	8	-0.352321	-0.365816	0.717974	alpha/beta-Hydrolases superfamily protein
AT1G13610.2	5	10	6	7	8	8	-0.398835	-0.358555	0.714137	alpha/beta-Hydrolases superfamily protein
AT1G13620.1	3	7	7	13	12	14	-0.482217	0.693506	0.26125	unknown protein
AT1G13630.1	24	14	18	27	30	27	1.36988	0.0869335	0.983851	Tetratricopeptide repeat (TPR)-like superfamily protein
AT1G13630.2	25	16	21	32	36	28	1.52271	0.133369	0.851364	Tetratricopeptide repeat (TPR)-like superfamily protein
AT1G13635.1	23	20	23	31	32	18	1.1834	-0.200429	0.730945	DNA glycosylase superfamily protein
AT1G13635.2	24	20	25	31	35	18	1.23961	-0.210738	0.71162	DNA glycosylase superfamily protein
AT1G13640.1	257	229	293	447	393	412	4.86846	0.187691	0.0633111	Phosphatidylinositol 3- and 4-kinase family protein
AT1G13650.1	481	636	607	508	482	534	5.5741	-0.671178	3.83e-08	unknown protein
AT1G13650.2	499	650	624	522	491	538	5.61088	-0.686745	1.15e-08	unknown protein
AT1G13670.1	75	68	86	98	78	84	3.00118	-0.314007	0.117478	unknown protein
AT1G13680.1	1	0	1	0	2	1	-2.02659	0.0807255	1	PLC-like phosphodiesterases superfamily protein
AT1G13690.1	134	131	169	297	222	245	4.40639	0.318114	0.00827115	ATPase E1
AT1G13700.1	19	22	29	18	18	13	1.07591	-0.999838	0.0101152	6-phosphogluconolactonase 1
AT1G13710.1	51	65	59	115	91	116	2.99295	0.381137	0.0555071	cytochrome P450, family 78, subfamily A, polypeptide 5
AT1G13730.1	367	388	387	761	642	683	5.74978	0.369347	1.36e-05	Nuclear transport factor 2 (NTF2) family protein with RNA binding (RRM-RBD-RNP motifs) domain
AT1G13740.1	76	83	64	118	101	97	3.28307	0.00311801	1	ABI five binding protein 2
AT1G13750.1	82	93	67	136	111	120	2.88147	0.092777	0.881533	Purple acid phosphatases superfamily protein
AT1G13770.1	117	118	117	136	158	146	3.77631	-0.173636	0.341656	Protein of unknown function, DUF647
AT1G13770.2	116	118	112	135	156	139	3.74466	-0.182511	0.328106	Protein of unknown function, DUF647
AT1G13780.1	56	58	56	85	74	59	2.65513	-0.138285	0.604021	F-box/RNI-like/FBD-like domains-containing protein
AT1G13790.1	51	40	54	76	65	76	2.81537	0.084553	0.85468	XH/XS domain-containing protein
AT1G13800.1	7	9	10	29	20	29	0.854828	1.07838	0.0101318	Tetratricopeptide repeat (TPR)-like superfamily protein
AT1G13810.1	82	65	82	112	77	79	3.26708	-0.272346	0.157366	Restriction endonuclease, type II-like superfamily protein
AT1G13820.1	449	487	565	667	654	665	5.81874	-0.0888375	0.478033	alpha/beta-Hydrolases superfamily protein
AT1G13830.1	34	24	30	54	39	64	1.53776	0.328001	0.52122	Carbohydrate-binding X8 domain superfamily protein
AT1G13860.1	162	155	194	280	209	245	4.40534	0.0246246	0.993535	QUASIMODO2 LIKE 1
AT1G13860.2	155	147	181	256	199	234	4.32198	0.0149557	1	QUASIMODO2 LIKE 1
AT1G13860.3	168	158	196	283	213	249	4.4422	0.0150347	1	QUASIMODO2 LIKE 1
AT1G13860.4	162	157	195	278	211	248	4.40784	0.0223183	1	QUASIMODO2 LIKE 1
AT1G13870.1	110	106	122	200	161	179	3.88088	0.178148	0.257263	calmodulin binding;purine nucleotide binding
AT1G13880.1	193	228	246	247	241	244	4.37222	-0.360788	0.000420192	ELM2 domain-containing protein
AT1G13890.1	0	0	1	0	0	0	-2.68607	-2.07173	1	soluble N-ethylmaleimide-sensitive factor adaptor protein 30
AT1G13900.1	231	258	263	444	389	417	4.79518	0.235666	0.0263301	Purple acid phosphatases superfamily protein
AT1G13910.1	80	80	101	65	89	96	3.12242	-0.553473	0.00170485	Leucine-rich repeat (LRR) family protein
AT1G13920.1	28	38	49	55	36	46	2.39525	-0.242291	0.452447	Remorin family protein
AT1G13930.1	3017	3174	3661	3020	3213	3156	9.4728	-0.55954	1.76e-13	unknown protein
AT1G13930.2	3001	3163	3643	2998	3181	3135	9.46435	-0.564583	8.7e-14	unknown protein
AT1G13930.3	3002	3163	3644	2998	3183	3136	9.46466	-0.564393	9.69e-14	unknown protein
AT1G13940.1	211	210	251	293	272	293	4.43766	-0.14339	0.211289	Plant protein of unknown function (DUF863)
AT1G13950.1	76	75	67	143	107	123	3.1221	0.270939	0.21973	eukaryotic elongation factor 5A-1
AT1G13960.1	195	213	185	261	276	231	4.26634	-0.125439	0.53023	WRKY DNA-binding protein 4
AT1G13960.2	180	202	168	246	258	217	4.15044	-0.108635	0.63913	WRKY DNA-binding protein 4
AT1G13970.1	54	77	74	118	118	112	2.72665	0.27204	0.395783	Protein of unknown function (DUF1336)
AT1G13980.1	409	420	461	704	581	647	5.51886	0.0837359	0.522283	sec7 domain-containing protein
AT1G13980.2	409	412	456	698	569	644	5.50707	0.0820958	0.544945	sec7 domain-containing protein
AT1G13990.1	155	205	244	125	111	148	3.9258	-1.14264	1.15e-16	unknown protein
AT1G13990.2	139	188	222	112	100	138	3.78719	-1.13808	8.2e-15	unknown protein
AT1G13990.3	120	155	196	98	83	121	3.55665	-1.12961	5.66e-13	unknown protein
AT1G14000.1	625	682	775	828	847	875	6.12831	-0.199755	0.0175522	VH1-interacting kinase
AT1G14010.1	177	207	217	390	311	332	4.5248	0.283539	0.011741	emp24/gp25L/p24 family/GOLD family protein
AT1G14020.1	167	182	204	352	261	273	4.45889	0.181805	0.128294	O-fucosyltransferase family protein
AT1G14030.1	286	339	418	496	413	487	5.36589	-0.0718239	0.691651	Rubisco methyltransferase family protein
AT1G14040.1	81	110	83	193	125	162	3.37285	0.301412	0.209732	EXS (ERD1/XPR1/SYG1) family protein
AT1G14060.1	111	123	141	290	246	268	4.16766	0.604037	0.000119764	GCK domain-containing protein
AT1G14070.1	55	70	37	87	101	98	2.72205	0.317626	0.273505	fucosyltransferase 7
AT1G14080.1	47	65	53	118	94	97	2.41208	0.403307	0.205785	fucosyltransferase 6
AT1G14090.1	41	58	62	57	61	64	2.71793	-0.315685	0.196496	pseudogene
AT1G14100.1	1	1	0	3	0	1	-2.00811	0.439258	1	fucosyltransferase 8
AT1G14110.1	0	0	0	0	0	0	-2.71529	-5.13e-15	1	fucosyltransferase 9
AT1G14120.1	249	275	259	506	425	452	4.79971	0.317866	0.139888	2-oxoglutarate (2OG) and Fe(II)-dependent oxygenase superfamily protein
AT1G14130.1	105	127	108	138	147	160	3.41461	-0.108134	0.700835	2-oxoglutarate (2OG) and Fe(II)-dependent oxygenase superfamily protein
AT1G14140.1	104	97	113	168	143	155	3.67253	0.0713707	0.822778	Mitochondrial substrate carrier family protein
AT1G14150.1	715	755	851	849	817	753	6.47019	-0.434902	3.83e-08	PsbQ-like 2
AT1G14150.2	526	562	641	658	606	575	6.04004	-0.405952	3.25e-06	PsbQ-like 2
AT1G14160.1	48	48	36	79	71	81	2.18063	0.30093	0.415834	Uncharacterised protein family (UPF0497)
AT1G14170.1	116	119	99	210	177	199	3.61238	0.305675	0.147667	RNA-binding KH domain-containing protein
AT1G14170.2	112	117	96	201	174	192	3.57184	0.298514	0.147667	RNA-binding KH domain-containing protein
AT1G14170.3	123	124	103	218	184	210	3.66481	0.300104	0.156596	RNA-binding KH domain-containing protein
AT1G14180.1	71	67	72	122	118	112	3.22577	0.248142	0.1689	RING/U-box superfamily protein
AT1G14180.2	71	66	70	116	114	105	3.17785	0.197377	0.343323	RING/U-box superfamily protein
AT1G14182.1	1	0	0	0	0	0	-2.52267	-2.07787	1	SCRL28 (SCR-like 28)
AT1G14185.1	29	40	25	48	39	43	1.82195	-0.0349659	1	Glucose-methanol-choline (GMC) oxidoreductase family protein
AT1G14190.1	38	52	61	92	76	73	2.53304	0.179602	0.531704	Glucose-methanol-choline (GMC) oxidoreductase family protein
AT1G14200.1	50	64	63	56	55	60	2.54303	-0.543961	0.011195	RING/U-box superfamily protein
AT1G14205.1	23	13	19	24	16	23	0.894299	-0.301144	0.501046	Ribosomal L18p/L5e family protein
AT1G14210.1	128	132	146	317	293	290	4.32792	0.651731	4.63e-09	Ribonuclease T2 family protein
AT1G14220.1	15	24	12	35	40	45	0.86635	0.732611	0.0893811	Ribonuclease T2 family protein
AT1G14225.1	0	0	0	0	0	1	-2.62948	1.71322	1	unknown protein
AT1G14230.1	222	252	259	341	289	311	4.54011	-0.137315	0.354211	GDA1/CD39 nucleoside phosphatase family protein
AT1G14240.1	130	147	168	306	319	309	3.85972	0.579681	0.00377034	GDA1/CD39 nucleoside phosphatase family protein
AT1G14240.2	129	148	169	308	321	308	3.86325	0.581438	0.00375976	GDA1/CD39 nucleoside phosphatase family protein
AT1G14240.3	124	138	157	293	297	291	3.77972	0.58083	0.00395511	GDA1/CD39 nucleoside phosphatase family protein
AT1G14240.4	129	148	170	309	325	309	3.87128	0.587785	0.00280341	GDA1/CD39 nucleoside phosphatase family protein
AT1G14250.1	200	103	103	122	44	128	4.30977	-1.01295	0.0199972	GDA1/CD39 nucleoside phosphatase family protein
AT1G14260.1	3	10	4	18	10	26	0.45985	1.15277	0.0330931	RING/FYVE/PHD zinc finger superfamily protein
AT1G14260.2	4	11	6	21	13	28	0.617183	1.0524	0.0288424	RING/FYVE/PHD zinc finger superfamily protein
AT1G14270.1	419	452	514	680	592	590	5.77574	-0.0690573	0.636373	CAAX amino terminal protease family protein
AT1G14270.2	395	427	479	630	556	545	5.69535	-0.0841032	0.525304	CAAX amino terminal protease family protein
AT1G14270.3	404	436	489	644	561	564	5.7244	-0.0837747	0.510662	CAAX amino terminal protease family protein
AT1G14270.4	379	409	451	606	522	530	5.63831	-0.0767169	0.566793	CAAX amino terminal protease family protein
AT1G14280.1	440	437	540	466	408	431	5.39174	-0.614269	6.14e-14	phytochrome kinase substrate 2
AT1G14290.1	159	182	195	328	244	270	4.32343	0.15266	0.317564	sphingoid base hydroxylase 2
AT1G14300.1	104	115	125	227	187	196	3.98426	0.329017	0.0137428	ARM repeat superfamily protein
AT1G14300.2	102	114	118	218	174	185	3.91479	0.290782	0.034622	ARM repeat superfamily protein
AT1G14310.1	74	87	95	107	127	107	3.3818	-0.080474	0.790071	Haloacid dehalogenase-like hydrolase (HAD) superfamily protein
AT1G14315.1	0	0	0	0	0	0	-2.68614	-5.13e-15	1	F-box and associated interaction domains-containing protein
AT1G14315.2	0	0	0	0	0	0	-2.68614	-5.13e-15	1	F-box and associated interaction domains-containing protein
AT1G14320.1	4367	4653	4998	9961	8124	8835	9.26936	0.441215	1.56e-21	Ribosomal protein L16p/L10e family protein
AT1G14320.2	3025	3177	3346	6890	5667	6146	8.75562	0.468991	3.42e-21	Ribosomal protein L16p/L10e family protein
AT1G14330.1	111	125	122	179	156	197	3.5369	0.0739994	0.765992	Galactose oxidase/kelch repeat superfamily protein
AT1G14340.1	139	132	129	183	170	151	3.6917	-0.165904	0.337624	RNA-binding (RRM/RBD/RNP motifs) family protein
AT1G14345.1	769	788	1017	1070	1030	1070	6.55692	-0.189679	0.0738517	NAD(P)-linked oxidoreductase superfamily protein
AT1G14350.1	227	235	269	276	248	285	4.56288	-0.349743	0.000753665	Duplicated homeodomain-like superfamily protein
AT1G14350.2	230	235	270	286	254	286	4.56187	-0.327886	0.0025853	Duplicated homeodomain-like superfamily protein
AT1G14360.1	172	167	208	299	273	269	4.54527	0.124652	0.352134	UDP-galactose transporter 3
AT1G14370.1	63	68	76	92	79	78	2.62583	-0.229819	0.363103	protein kinase 2A
AT1G14380.1	320	327	315	514	409	416	5.15412	-0.0252861	0.941336	IQ-domain 28
AT1G14380.2	285	280	279	452	360	367	4.97921	-0.0195143	0.982462	IQ-domain 28
AT1G14380.3	310	325	310	496	396	402	5.11924	-0.0483812	0.78264	IQ-domain 28
AT1G14390.1	28	32	22	68	50	66	1.70595	0.657241	0.0497926	Leucine-rich repeat protein kinase family protein
AT1G14400.1	1039	1066	1107	1348	1154	1262	6.75439	-0.272112	0.00314048	ubiquitin carrier protein 1
AT1G14400.2	810	830	842	1077	924	988	6.40726	-0.233227	0.0134411	ubiquitin carrier protein 1
AT1G14410.1	195	228	237	445	335	394	5.00291	0.331682	0.00394808	ssDNA-binding transcriptional regulator
AT1G14420.1	0	0	0	0	0	0	-2.35293	-5.13e-15	1	Pectate lyase family protein
AT1G14430.1	52	50	55	84	80	71	2.80168	0.0848085	0.864085	glyoxal oxidase-related protein
AT1G14440.1	101	117	128	224	191	222	4.33718	0.383859	0.00175695	homeobox protein 31
AT1G14440.2	91	113	117	203	180	206	4.2294	0.379291	0.00292233	homeobox protein 31
AT1G14450.1	396	437	463	791	649	770	5.7451	0.271903	0.000796232	NADH dehydrogenase (ubiquinone)s
AT1G14455.1	5	9	1	5	4	4	-0.911323	-0.694612	0.52838	unknown protein
AT1G14460.1	240	245	277	372	322	358	4.7237	-0.0315839	0.89314	AAA-type ATPase family protein
AT1G14470.1	8	16	14	19	17	16	0.806698	-0.0424093	1	Pentatricopeptide repeat (PPR) superfamily protein
AT1G14480.1	12	18	14	30	23	20	1.48328	0.231033	0.760048	Ankyrin repeat family protein
AT1G14480.2	10	10	11	28	18	15	1.26034	0.474253	0.315561	Ankyrin repeat family protein
AT1G14490.1	7	5	9	12	9	18	0.506644	0.391809	0.617904	Predicted AT-hook DNA-binding family protein
AT1G14500.1	3	1	2	3	1	0	-1.88658	-1.00749	0.575374	Ankyrin repeat family protein
AT1G14510.1	312	299	367	510	419	464	5.23201	0.0130079	1	alfin-like 7
AT1G14520.1	19	22	24	24	27	31	1.33626	-0.156752	0.847298	myo-inositol oxygenase 1
AT1G14520.2	14	22	23	22	25	27	1.24077	-0.163781	0.855452	myo-inositol oxygenase 1
AT1G14530.1	47	43	56	69	71	55	2.36127	-0.0776939	0.891176	Protein of unknown function (DUF1084)
AT1G14530.2	57	53	67	86	80	68	2.60917	-0.0932652	0.80481	Protein of unknown function (DUF1084)
AT1G14540.1	69	74	49	97	67	97	2.62734	-0.0763923	0.988427	Peroxidase superfamily protein
AT1G14550.1	5	2	1	8	9	12	-0.336	1.32636	0.0658256	Peroxidase superfamily protein
AT1G14560.1	150	156	172	207	189	202	4.03241	-0.173272	0.214568	Mitochondrial substrate carrier family protein
AT1G14570.1	415	468	491	661	589	600	5.58759	-0.0674306	0.535974	UBX domain-containing protein
AT1G14570.2	404	460	474	639	567	577	5.54638	-0.082573	0.421013	UBX domain-containing protein
AT1G14570.3	393	449	471	636	559	575	5.53107	-0.0656957	0.555029	UBX domain-containing protein
AT1G14570.4	379	439	450	610	533	549	5.47823	-0.0806803	0.451073	UBX domain-containing protein
AT1G14580.1	183	191	267	355	338	327	4.95197	0.179162	0.180984	C2H2-like zinc finger protein
AT1G14580.2	177	185	263	350	335	323	4.93404	0.19908	0.135506	C2H2-like zinc finger protein
AT1G14590.1	73	75	93	117	106	113	3.35845	-0.0169951	1	Nucleotide-diphospho-sugar transferase family protein
AT1G14600.1	20	30	37	60	33	53	1.66829	0.249162	0.555135	Homeodomain-like superfamily protein
AT1G14610.1	1321	1358	1420	2494	2067	2288	7.34221	0.239282	0.000917914	valyl-tRNA synthetase / valine--tRNA ligase (VALRS)
AT1G14620.1	169	180	171	349	289	301	4.572	0.351104	0.0130658	decoy
AT1G14620.2	151	164	148	317	257	271	4.40373	0.365846	0.00960984	decoy
AT1G14630.1	37	27	49	56	79	56	2.40286	0.269262	0.401906	unknown protein
AT1G14640.1	44	49	62	77	66	63	2.60291	-0.0856235	0.848587	SWAP (Suppressor-of-White-APricot)/surp domain-containing protein
AT1G14642.1	0	2	0	0	3	0	-2.26387	0.0879884	1	unknown protein
AT1G14650.1	531	623	691	1068	954	942	6.15972	0.189607	0.0236058	SWAP (Suppressor-of-White-APricot)/surp domain-containing protein / ubiquitin family protein
AT1G14650.2	521	605	663	1021	916	893	6.10024	0.166832	0.0520521	SWAP (Suppressor-of-White-APricot)/surp domain-containing protein / ubiquitin family protein
AT1G14660.1	58	56	56	64	67	74	2.7825	-0.226294	0.351041	Na+/H+ exchanger 8
AT1G14660.2	55	52	51	61	62	73	2.74486	-0.186033	0.49427	Na+/H+ exchanger 8
AT1G14670.1	851	958	1017	1663	1352	1639	6.71593	0.22124	0.0299202	Endomembrane protein 70 protein family
AT1G14680.1	6	9	7	20	9	8	0.305399	0.24733	0.82389	unknown protein
AT1G14685.1	198	210	211	333	261	329	4.74422	0.076759	0.683198	basic pentacysteine 2
AT1G14685.2	198	216	221	336	260	328	4.76788	0.0417406	0.894785	basic pentacysteine 2
AT1G14685.3	208	227	241	344	267	340	4.81472	-0.00623074	1	basic pentacysteine 2
AT1G14686.1	4	3	3	2	0	1	-1.61536	-2.08418	0.0512251	ENTH/ANTH/VHS superfamily protein
AT1G14687.1	12	18	14	22	21	11	1.12499	-0.199765	0.78274	homeobox protein 32
AT1G14688.1	0	0	0	0	0	0	-2.71529	-5.13e-15	1	unknown protein
AT1G14690.1	357	378	415	459	425	398	5.30685	-0.339488	2.5e-05	microtubule-associated protein 65-7
AT1G14690.2	351	362	406	445	411	387	5.27467	-0.344679	2.3e-05	microtubule-associated protein 65-7
AT1G14700.1	274	291	356	435	429	430	5.37823	-0.00297042	1	purple acid phosphatase 3
AT1G14700.2	259	272	331	405	404	416	5.29067	0.0134888	1	purple acid phosphatase 3
AT1G14710.1	573	617	626	1198	1040	1097	6.34106	0.378276	1.43e-08	hydroxyproline-rich glycoprotein family protein
AT1G14710.2	571	603	622	1193	1037	1085	6.3287	0.385624	5.12e-09	hydroxyproline-rich glycoprotein family protein
AT1G14720.1	300	326	337	471	414	461	5.39797	-0.0142295	1	xyloglucan endotransglucosylase/hydrolase 28
AT1G14730.1	141	150	136	187	173	172	3.82619	-0.184225	0.484527	Cytochrome b561/ferric reductase transmembrane protein family
AT1G14740.1	466	523	514	707	698	661	5.6569	-0.0372749	0.864127	Protein of unknown function (DUF1423)
AT1G14750.1	6	11	12	37	27	24	0.725285	1.09706	0.00675575	Cyclin family protein
AT1G14750.2	4	6	8	19	15	16	0.0188535	0.966279	0.0622159	Cyclin family protein
AT1G14760.1	1	2	0	2	0	0	-1.71567	-0.939804	0.88844	KNOX Arabidopsis thaliana meinox
AT1G14760.2	1	2	0	5	2	4	-1.10186	1.29044	0.47366	KNOX Arabidopsis thaliana meinox
AT1G14760.3	2	2	0	3	2	3	-1.52264	0.470207	0.957458	KNOX Arabidopsis thaliana meinox
AT1G14770.1	64	68	68	82	70	91	2.9446	-0.21659	0.369425	RING/FYVE/PHD zinc finger superfamily protein
AT1G14770.2	60	63	63	78	61	83	2.85804	-0.242943	0.296397	RING/FYVE/PHD zinc finger superfamily protein
AT1G14780.1	55	50	46	45	55	61	1.96636	-0.406031	0.324987	MAC/Perforin domain-containing protein
AT1G14790.1	142	131	145	166	138	121	3.77659	-0.475466	0.000991972	RNA-dependent RNA polymerase 1
AT1G14800.1	0	0	1	0	1	0	-2.47194	-0.357977	1	Nucleic acid-binding, OB-fold-like protein
AT1G14810.1	627	707	724	1597	1310	1405	6.67817	0.568039	3.3e-18	semialdehyde dehydrogenase family protein
AT1G14820.1	106	125	129	168	133	164	3.70617	-0.127999	0.508553	Sec14p-like phosphatidylinositol transfer family protein
AT1G14820.2	107	120	129	164	132	166	3.70916	-0.121014	0.535281	Sec14p-like phosphatidylinositol transfer family protein
AT1G14820.3	116	134	138	184	142	177	3.82452	-0.123099	0.486484	Sec14p-like phosphatidylinositol transfer family protein
AT1G14830.1	774	847	838	1387	1164	1253	6.49573	0.12862	0.212827	DYNAMIN-like 1C
AT1G14840.1	375	364	433	587	495	483	5.51656	-0.0804165	0.486926	microtubule-associated proteins 70-4
AT1G14840.2	359	345	420	558	463	473	5.46166	-0.0869208	0.441105	microtubule-associated proteins 70-4
AT1G14850.1	303	365	401	715	626	660	5.53609	0.409646	3.37e-06	nucleoporin 155
AT1G14860.1	46	57	51	102	93	102	2.40551	0.449443	0.0623	nudix hydrolase homolog 18
AT1G14870.1	894	858	706	809	724	944	6.08699	-0.5011	0.127366	PLANT CADMIUM RESISTANCE 2
AT1G14880.1	7	0	6	2	1	0	-1.5349	-2.46185	0.0613489	PLANT CADMIUM RESISTANCE 1
AT1G14890.1	126	147	154	104	117	106	3.98341	-0.8796	5.47e-13	Plant invertase/pectin methylesterase inhibitor superfamily protein
AT1G14900.1	322	304	364	439	383	433	5.45128	-0.155111	0.185762	high mobility group A
AT1G14910.1	239	265	327	462	366	392	4.99335	0.0583092	0.739752	ENTH/ANTH/VHS superfamily protein
AT1G14920.1	335	316	396	643	501	513	5.32233	0.16329	0.166875	GRAS family transcription factor family protein
AT1G14930.1	2	2	2	2	0	3	-1.50997	-0.716513	0.795456	Polyketide cyclase/dehydrase and lipid transport superfamily protein
AT1G14940.1	1	0	0	1	0	0	-2.65746	-0.368196	1	Polyketide cyclase/dehydrase and lipid transport superfamily protein
AT1G14940.2	1	0	0	1	0	0	-2.65746	-0.36819	1	Polyketide cyclase/dehydrase and lipid transport superfamily protein
AT1G14950.1	1	0	0	0	0	0	-2.30779	-2.08587	1	Polyketide cyclase/dehydrase and lipid transport superfamily protein
AT1G14960.1	72	76	61	179	133	130	2.90024	0.565445	0.27786	Polyketide cyclase/dehydrase and lipid transport superfamily protein
AT1G14970.1	64	73	68	133	116	124	3.18024	0.365099	0.0537387	O-fucosyltransferase family protein
AT1G14980.1	670	829	829	1710	1377	1365	6.77754	0.436874	4.94e-08	chaperonin 10
AT1G14990.1	64	73	69	121	93	99	3.21085	0.106493	0.684015	unknown protein
AT1G14990.2	51	56	50	102	75	74	2.89975	0.178826	0.496328	unknown protein
AT1G15000.1	121	117	138	258	219	238	4.30077	0.429569	0.000909077	serine carboxypeptidase-like 50
AT1G15010.1	1	2	16	3	3	8	-0.744465	-0.852051	0.603855	unknown protein
AT1G15015.1	0	0	1	1	0	0	-2.60203	-0.361579	1	F-box family protein
AT1G15020.1	130	145	147	259	219	211	3.91245	0.208866	0.190872	quiescin-sulfhydryl oxidase 1
AT1G15020.2	150	165	157	287	236	227	4.0847	0.167843	0.308278	quiescin-sulfhydryl oxidase 1
AT1G15030.1	351	368	381	443	440	457	5.16225	-0.211584	0.0420529	Protein of unknown function (DUF789)
AT1G15040.1	29	30	38	45	43	54	1.55474	0.0575295	1	Class I glutamine amidotransferase-like superfamily protein
AT1G15040.2	26	29	37	43	43	50	1.49513	0.0739855	0.994848	Class I glutamine amidotransferase-like superfamily protein
AT1G15050.1	4	1	1	1	1	1	-1.44778	-1.37598	0.363153	indole-3-acetic acid inducible 34
AT1G15060.1	344	406	378	498	428	427	5.25007	-0.236589	0.0189582	Uncharacterised conserved protein UCP031088, alpha/beta hydrolase
AT1G15080.1	55	51	57	60	61	63	2.79432	-0.321086	0.182281	lipid phosphate phosphatase 2
AT1G15100.1	202	181	212	388	317	342	4.61849	0.315643	0.0069856	RING-H2 finger A2A
AT1G15110.1	133	133	113	185	161	187	3.74241	-0.0146018	1	phosphatidyl serine synthase family protein
AT1G15110.2	125	127	101	174	151	178	3.65621	0.00293662	1	phosphatidyl serine synthase family protein
AT1G15120.1	641	655	638	1242	1020	1026	6.24961	0.261585	0.0095232	Ubiquinol-cytochrome C reductase hinge protein
AT1G15120.2	483	507	493	965	783	827	5.87186	0.29342	0.00190591	Ubiquinol-cytochrome C reductase hinge protein
AT1G15125.1	22	10	14	25	9	16	0.70409	-0.408126	0.657475	S-adenosyl-L-methionine-dependent methyltransferases superfamily protein
[truncated: 31,402 more rows]
[truncated: 1 more columns]
