# Supplementary material for: Companion cells with high florigen production express other small proteins and reveal a nitrogen-sensitive FT repressor
Source: bioRxiv preprint, doi:10.1101/2024.08.17.608367, version 2 (2025-08-08)
Supplement: Supplemental data 12 [file 608367_file14.xlsx]

## Sheet: DataS12_WTvpSUC2NIGT1.4#3
reference_id	WT.rep1	WT.rep2	WT.rep3	pSUC2:NIGT1.4#3.rep1	pSUC2:NIGT1.4#3.rep2	pSUC2:NIGT1.4#3.rep3	logconc	logfc	adj_pvalue	annotation
AT1G01010.1	89	97	97	26	170	245	3.21025	0.153373	0.698939	NAC domain containing protein 1
AT1G01020.1	119	114	131	35	194	197	3.76465	-0.219005	0.37856	Arv1-like protein
AT1G01020.2	106	96	112	31	166	187	3.5875	-0.159077	0.639857	Arv1-like protein
AT1G01030.1	29	28	29	11	61	72	1.76078	0.286166	0.488196	AP2/B3-like transcriptional factor family protein
AT1G01040.1	481	590	517	96	662	832	5.72229	-0.479257	4.53781e-07	dicer-like 1
AT1G01040.2	451	564	497	91	633	775	5.65201	-0.490085	2.10497e-07	dicer-like 1
AT1G01046.1	4	2	7	1	6	6	-1.03766	-0.445223	0.922524	MIR838a; miRNA
AT1G01050.1	532	588	606	208	1208	1398	6.07972	0.255417	0.00130719	pyrophosphorylase 1
AT1G01060.1	603	639	712	180	1015	1212	5.63271	-0.144706	0.255097	Homeodomain-like superfamily protein
AT1G01060.2	592	628	701	177	997	1191	5.60878	-0.144919	0.268516	Homeodomain-like superfamily protein
AT1G01060.3	548	572	640	162	920	1113	5.49174	-0.13012	0.349949	Homeodomain-like superfamily protein
AT1G01060.4	598	624	702	182	1006	1195	5.62096	-0.132833	0.33465	Homeodomain-like superfamily protein
AT1G01060.5	528	532	619	153	869	1068	5.4276	-0.134741	0.335293	Homeodomain-like superfamily protein
AT1G01070.1	130	140	142	35	272	303	3.82707	0.0883436	0.878568	nodulin MtN21 /EamA-like transporter family protein
AT1G01070.2	117	125	125	29	246	275	3.68325	0.0948292	0.90284	nodulin MtN21 /EamA-like transporter family protein
AT1G01080.1	529	537	635	176	1076	1252	6.23237	0.103488	0.390739	RNA-binding (RRM/RBD/RNP motifs) family protein
AT1G01080.2	486	497	591	162	990	1167	6.13041	0.103042	0.397714	RNA-binding (RRM/RBD/RNP motifs) family protein
AT1G01090.1	1207	1298	1435	448	2744	3505	7.42881	0.297308	3.05862e-05	pyruvate dehydrogenase E1 alpha
AT1G01100.1	1372	1532	1604	435	2778	3040	7.62694	0.0203443	0.969231	60S acidic ribosomal protein family
AT1G01100.2	1617	1774	1896	516	3434	3791	7.85152	0.0871309	0.419974	60S acidic ribosomal protein family
AT1G01100.3	1252	1377	1439	428	2727	2950	7.47228	0.135782	0.147435	60S acidic ribosomal protein family
AT1G01100.4	1366	1525	1600	430	2746	3008	7.61926	0.0096676	1	60S acidic ribosomal protein family
AT1G01110.1	33	48	45	12	97	101	2.3173	0.267607	0.522735	IQ-domain 18
AT1G01110.2	38	60	52	16	121	118	2.61383	0.305225	0.273941	IQ-domain 18
AT1G01120.1	487	564	663	178	1168	1554	5.89022	0.269171	0.0992942	3-ketoacyl-CoA synthase 1
AT1G01130.1	14	9	5	2	22	19	0.166442	0.13018	1	unknown protein
AT1G01140.1	357	434	489	67	545	617	5.16831	-0.544126	3.50216e-06	CBL-interacting protein kinase 9
AT1G01140.2	338	413	453	65	517	585	5.0839	-0.528107	1.29571e-05	CBL-interacting protein kinase 9
AT1G01140.3	325	409	462	61	515	583	5.07205	-0.533299	7.15938e-06	CBL-interacting protein kinase 9
AT1G01150.1	0	1	0	0	0	2	-1.91172	0.374049	1	Homeodomain-like protein with RING/FYVE/PHD-type zinc finger domain
AT1G01160.1	237	233	266	79	400	517	4.82928	-0.0142853	1	GRF1-interacting factor 2
AT1G01160.2	216	212	247	72	357	470	4.70115	-0.0368834	1	GRF1-interacting factor 2
AT1G01170.1	370	426	520	96	527	646	5.39852	-0.497196	6.89061e-06	Protein of unknown function (DUF1138)
AT1G01170.2	290	351	423	84	413	520	5.11309	-0.501541	4.22027e-05	Protein of unknown function (DUF1138)
AT1G01180.1	62	58	56	17	135	151	2.83146	0.30789	0.311075	S-adenosyl-L-methionine-dependent methyltransferases superfamily protein
AT1G01183.1	0	0	0	0	0	0	-2.69864	5.12548e-15	1	MIR165/MIR165A; miRNA
AT1G01190.1	175	171	145	105	528	696	4.28272	1.00326	1.18261e-07	cytochrome P450, family 78, subfamily A, polypeptide 8
AT1G01200.1	26	24	28	9	43	64	1.74168	0.110004	0.869594	RAB GTPase homolog A3
AT1G01210.1	87	96	113	33	211	237	3.84573	0.240619	0.171481	DNA-directed RNA polymerase, subunit M, archaeal
AT1G01220.1	321	284	413	84	556	656	5.14641	-0.115822	0.46798	L-fucokinase/GDP-L-fucose pyrophosphorylase
AT1G01225.1	25	31	43	11	69	71	2.01969	0.152321	0.711826	NC domain-containing protein-related
AT1G01230.1	179	168	201	60	361	421	4.44505	0.160303	0.250973	ORMDL family protein
AT1G01240.1	206	186	236	27	200	261	3.99179	-0.840914	1.56232e-10	unknown protein
AT1G01240.2	199	173	222	26	188	242	3.93913	-0.85798	9.25255e-10	unknown protein
AT1G01240.3	212	186	240	29	210	262	4.04641	-0.822223	3.77434e-10	unknown protein
AT1G01250.1	66	35	60	6	43	54	2.32688	-1.11531	4.42321e-05	Integrase-type DNA-binding superfamily protein
AT1G01260.1	129	156	169	31	235	312	4.02885	-0.129467	0.419136	basic helix-loop-helix (bHLH) DNA-binding superfamily protein
AT1G01260.2	119	144	156	29	220	285	3.95433	-0.126814	0.470348	basic helix-loop-helix (bHLH) DNA-binding superfamily protein
AT1G01260.3	127	151	161	30	224	296	3.99539	-0.150168	0.335275	basic helix-loop-helix (bHLH) DNA-binding superfamily protein
AT1G01280.1	0	0	0	0	0	0	-0.438406	5.12548e-15	1	cytochrome P450, family 703, subfamily A, polypeptide 2
AT1G01290.1	99	99	124	32	189	188	3.56773	-0.101441	0.848923	cofactor of nitrate reductase and xanthine dehydrogenase 3
AT1G01290.2	105	106	131	29	186	202	3.60663	-0.170905	0.481903	cofactor of nitrate reductase and xanthine dehydrogenase 3
AT1G01300.1	376	407	439	156	877	898	5.87019	0.243832	0.0600561	Eukaryotic aspartyl protease family protein
AT1G01310.1	0	2	1	0	1	3	-2.22681	-0.0539052	1	CAP (Cysteine-rich secretory proteins, Antigen 5, and Pathogenesis-related 1 protein) superfamily protein
AT1G01320.1	4168	4657	5273	1100	6880	8497	9.04697	-0.241318	0.00502285	Tetratricopeptide repeat (TPR)-like superfamily protein
AT1G01320.2	4121	4628	5252	1106	6834	8447	9.03785	-0.235293	0.00655567	Tetratricopeptide repeat (TPR)-like superfamily protein
AT1G01340.1	75	67	72	26	112	154	2.69464	0.0176795	1	cyclic nucleotide gated channel 10
AT1G01340.2	81	70	73	27	119	161	2.78542	0.0236529	1	cyclic nucleotide gated channel 10
AT1G01350.1	160	178	174	38	266	391	4.2902	-0.0441149	0.789219	Zinc finger (CCCH-type/C3HC4-type RING finger) family protein
AT1G01355.1	0	0	0	0	0	0	-2.50326	5.12548e-15	1	Putative endonuclease or glycosyl hydrolase
AT1G01360.1	161	121	150	27	169	228	3.70831	-0.49983	0.00152284	regulatory component of ABA receptor 1
AT1G01370.1	66	45	52	8	87	88	2.73564	-0.306203	0.16564	Histone superfamily protein
AT1G01370.2	67	46	54	7	83	88	2.75399	-0.384947	0.0698675	Histone superfamily protein
AT1G01380.1	12	11	23	6	27	31	0.811679	0.0220697	1	Homeodomain-like superfamily protein
AT1G01390.1	75	91	104	16	121	100	3.09725	-0.638125	0.00160247	UDP-Glycosyltransferase superfamily protein
AT1G01400.1	0	0	0	0	0	0	-2.65294	5.12548e-15	1	unknown protein
AT1G01420.1	92	87	113	36	148	207	3.62415	-0.0204784	1	UDP-glucosyl transferase 72B3
AT1G01430.1	437	439	485	175	866	1106	5.75173	0.227086	0.0372415	TRICHOME BIREFRINGENCE-LIKE 25
AT1G01440.1	127	147	161	47	282	348	4.01123	0.176698	0.255017	Protein of unknown function (DUF3133)
AT1G01450.1	42	40	40	17	59	62	2.09764	-0.244723	0.833138	Protein kinase superfamily protein
AT1G01453.1	2	1	3	2	4	4	-1.16784	0.351885	0.892723	unknown protein
AT1G01453.2	2	1	1	1	4	3	-1.31211	0.539599	0.843707	unknown protein
AT1G01460.1	0	1	0	0	0	0	-2.6986	-2.06094	1	Phosphatidylinositol-4-phosphate 5-kinase, core
AT1G01470.1	465	558	588	119	777	987	6.16484	-0.25146	0.055016	Late embryogenesis abundant protein
AT1G01480.1	7	9	11	2	18	32	0.148914	0.439676	0.728559	1-amino-cyclopropane-1-carboxylate synthase 2
AT1G01480.2	5	7	9	2	18	28	-0.041503	0.7016	0.397591	1-amino-cyclopropane-1-carboxylate synthase 2
AT1G01490.1	556	571	670	110	979	1178	5.83051	-0.180449	0.0833391	Heavy metal transport/detoxification superfamily protein
AT1G01490.2	521	543	644	104	924	1090	5.74013	-0.199961	0.0563579	Heavy metal transport/detoxification superfamily protein
AT1G01500.1	98	122	128	32	209	234	4.06289	-0.0114835	1	Erythronate-4-phosphate dehydrogenase family protein
AT1G01510.1	342	413	444	92	657	843	5.53107	-0.0703621	0.550601	NAD(P)-binding Rossmann-fold superfamily protein
AT1G01520.1	52	54	78	11	64	84	2.26552	-0.670728	0.00164591	Homeodomain-like superfamily protein
AT1G01540.1	553	606	677	125	1070	1217	5.97992	-0.113424	0.344518	Protein kinase superfamily protein
AT1G01540.2	577	629	710	135	1111	1294	6.0531	-0.0974286	0.423378	Protein kinase superfamily protein
AT1G01550.1	1031	1093	1163	376	1787	2183	6.77876	0.00110413	0.986122	Protein of unknown function (DUF793)
AT1G01550.2	983	1041	1117	355	1700	2080	6.71364	-0.00946335	1	Protein of unknown function (DUF793)
AT1G01560.1	17	33	12	5	20	26	0.521182	-0.691137	0.474864	MAP kinase 11
AT1G01560.2	18	42	16	5	21	32	0.684983	-0.823722	0.313313	MAP kinase 11
AT1G01570.1	23	21	24	6	37	41	1.28082	-0.155543	0.914089	Protein of unknown function (DUF604)
AT1G01580.1	133	117	113	113	299	391	3.78725	1.03272	0.146491	ferric reduction oxidase 2
AT1G01590.1	4	2	7	1	4	6	-0.711305	-0.678111	0.67061	ferric reduction oxidase 1
AT1G01600.1	74	88	105	42	145	183	3.51253	0.0988136	0.637911	cytochrome P450, family 86, subfamily A, polypeptide 4
AT1G01610.1	372	425	468	180	896	1129	5.74301	0.370778	7.4772e-05	glycerol-3-phosphate acyltransferase 4
AT1G01620.1	3041	2994	3420	910	6258	7598	8.41529	0.147374	0.15909	plasma membrane intrinsic protein 1C
AT1G01620.2	2701	2646	3044	830	5597	6714	8.25056	0.160512	0.112713	plasma membrane intrinsic protein 1C
AT1G01630.1	393	518	565	148	931	1187	5.86684	0.152487	0.184442	Sec14p-like phosphatidylinositol transfer family protein
AT1G01640.1	38	38	45	13	69	90	2.08661	0.0500677	0.99761	BTB/POZ domain-containing protein
AT1G01640.2	34	37	42	13	64	81	1.97243	0.034255	1	BTB/POZ domain-containing protein
AT1G01650.1	238	276	342	67	469	599	4.99107	-0.0723691	0.728625	SIGNAL PEPTIDE PEPTIDASE-LIKE 4
AT1G01650.2	230	271	338	64	463	576	4.95514	-0.0847432	0.652632	SIGNAL PEPTIDE PEPTIDASE-LIKE 4
AT1G01660.1	14	22	7	1	23	37	0.594662	-0.0359476	0.94983	RING/U-box superfamily protein
AT1G01670.1	9	15	15	2	23	23	0.600995	-0.167491	0.844555	RING/U-box superfamily protein
AT1G01680.1	3	1	5	4	4	4	-0.87067	0.216009	0.860179	plant U-box 54
AT1G01690.1	51	61	69	17	87	101	2.86565	-0.27468	0.397773	putative recombination initiation defects 3
AT1G01695.1	9	5	10	0	5	2	-0.702928	-2.17318	0.00126908	Phosphatidylinositol N-acetyglucosaminlytransferase subunit P-related
AT1G01700.1	14	17	11	4	28	22	0.951637	-0.0949865	1	RHO guanyl-nucleotide exchange factor 2
AT1G01710.1	264	334	291	87	499	603	5.02088	-0.0357646	1	Acyl-CoA thioesterase family protein
AT1G01720.1	501	661	659	114	710	898	5.59793	-0.546786	9.6175e-07	NAC (No Apical Meristem) domain transcriptional regulator superfamily protein
AT1G01725.1	39	47	58	7	58	76	2.22325	-0.500809	0.0525883	unknown protein
AT1G01730.1	128	138	157	42	228	236	3.94554	-0.19105	0.407174	unknown protein
AT1G01740.1	65	57	59	4	85	101	2.76089	-0.418571	0.0193737	Protein kinase protein with tetratricopeptide repeat domain
AT1G01740.2	69	59	60	7	86	104	2.82538	-0.409532	0.0254156	Protein kinase protein with tetratricopeptide repeat domain
AT1G01750.1	92	77	48	36	221	285	3.01148	0.825444	0.0084154	actin depolymerizing factor 11
AT1G01760.1	23	39	27	6	41	54	1.74623	-0.289034	0.547831	adenosine deaminases;RNA binding;RNA binding;adenosine deaminases
AT1G01770.1	178	182	234	38	270	305	4.24829	-0.418648	0.00238491	unknown protein
AT1G01780.1	83	102	93	45	159	217	3.38049	0.194089	0.32209	GATA type zinc finger transcription factor family protein
AT1G01790.1	2050	2077	2403	422	2860	3476	7.82529	-0.433425	2.2055e-09	K+ efflux antiporter 1
AT1G01800.1	607	585	741	186	1059	1290	6.05082	-0.0583743	0.780089	NAD(P)-binding Rossmann-fold superfamily protein
AT1G01800.2	558	560	708	168	998	1203	5.96685	-0.0784823	0.596148	NAD(P)-binding Rossmann-fold superfamily protein
AT1G01810.1	5	4	3	1	15	10	-0.24862	0.636017	0.568725	unknown protein
AT1G01820.1	294	313	339	75	531	593	5.2345	-0.124716	0.329489	peroxin 11c
AT1G01830.1	183	178	179	49	296	362	4.29783	-0.0755061	0.807758	ARM repeat superfamily protein
AT1G01830.2	187	184	188	49	299	371	4.32878	-0.102731	0.656125	ARM repeat superfamily protein
AT1G01830.3	188	189	196	53	306	386	4.37144	-0.0830198	0.768977	ARM repeat superfamily protein
AT1G01840.1	36	31	41	8	41	51	1.90179	-0.568451	0.0903232	unknown protein
AT1G01860.1	135	137	164	28	171	229	3.88037	-0.493066	0.00154249	Ribosomal RNA adenine dimethylase family protein
AT1G01880.1	9	20	22	3	27	41	1.24632	-0.00106449	1	5'-3' exonuclease family protein
AT1G01880.2	9	20	19	3	25	39	1.19248	0.00136297	1	5'-3' exonuclease family protein
AT1G01900.1	196	180	203	69	350	413	4.50752	0.0767116	0.602349	subtilase family protein
AT1G01910.1	386	405	456	104	775	958	5.52725	0.07248	0.811547	P-loop containing nucleoside triphosphate hydrolases superfamily protein
AT1G01910.2	438	460	507	118	855	1051	5.71398	0.0438803	0.972083	P-loop containing nucleoside triphosphate hydrolases superfamily protein
AT1G01910.3	416	427	488	112	813	991	5.63442	0.0445307	0.968083	P-loop containing nucleoside triphosphate hydrolases superfamily protein
AT1G01910.4	403	415	460	104	789	966	5.55291	0.0518798	0.957961	P-loop containing nucleoside triphosphate hydrolases superfamily protein
AT1G01910.5	345	372	410	95	709	855	5.43575	0.0777305	0.771714	P-loop containing nucleoside triphosphate hydrolases superfamily protein
AT1G01920.1	110	114	109	27	200	231	3.92087	-0.00747081	1	SET domain-containing protein
AT1G01920.2	120	129	125	35	228	270	4.09345	0.0463633	0.970189	SET domain-containing protein
AT1G01930.1	141	150	147	55	264	307	4.06965	0.0661452	0.625998	zinc finger protein-related
AT1G01940.1	75	95	81	26	177	212	3.58641	0.256858	0.269307	Cyclophilin-like peptidyl-prolyl cis-trans isomerase family protein
AT1G01950.1	224	262	281	65	402	504	4.73786	-0.123505	0.42758	armadillo repeat kinesin 2
AT1G01950.2	217	246	267	62	372	475	4.66106	-0.14675	0.335444	armadillo repeat kinesin 2
AT1G01950.3	219	256	274	63	384	486	4.69475	-0.146463	0.317921	armadillo repeat kinesin 2
AT1G01960.1	733	820	909	229	1546	1960	6.53291	0.120614	0.288979	SEC7-like guanine nucleotide exchange family protein
AT1G01970.1	278	329	373	78	496	534	5.18935	-0.271658	0.0680515	Tetratricopeptide repeat (TPR)-like superfamily protein
AT1G01980.1	0	0	0	0	1	0	-2.48292	1.72467	1	FAD-binding Berberine family protein
AT1G01990.1	129	157	174	47	233	283	4.18554	-0.158122	0.528836	unknown protein
AT1G02000.1	84	103	105	27	172	245	3.39586	0.133105	0.668997	UDP-D-glucuronate 4-epimerase 2
AT1G02010.1	150	158	170	23	187	277	3.98199	-0.457996	0.000437938	secretory 1A
AT1G02010.2	122	129	149	21	164	235	3.72915	-0.404116	0.00263867	secretory 1A
AT1G02020.1	115	128	146	51	174	261	3.80735	-0.106694	1	nitroreductase family protein
AT1G02020.2	107	121	140	50	165	249	3.73201	-0.0900552	1	nitroreductase family protein
AT1G02030.1	5	8	4	2	2	10	-0.330497	-0.7206	0.649864	C2H2-like zinc finger protein
AT1G02040.1	0	0	0	0	0	2	-2.63077	2.47236	1	C2H2-type zinc finger family protein
AT1G02050.1	45	54	50	7	72	72	2.92512	-0.500437	0.363669	Chalcone and stilbene synthase family protein
AT1G02060.1	59	79	75	15	114	95	2.87786	-0.38108	0.104544	Tetratricopeptide repeat (TPR)-like superfamily protein
AT1G02065.1	29	22	33	5	16	11	1.31466	-1.82729	7.34327e-06	squamosa promoter binding protein-like 8
AT1G02065.2	27	17	31	5	17	12	1.21309	-1.5713	0.00030594	squamosa promoter binding protein-like 8
AT1G02070.1	0	5	3	1	2	1	-1.20144	-1.34839	0.673777	unknown protein
AT1G02074.1	0	0	0	0	0	0	-2.7221	5.12548e-15	1	unknown protein
AT1G02080.1	1376	1520	1572	376	2164	2705	7.22605	-0.219167	0.0333783	transcription regulators
AT1G02080.2	1407	1541	1598	387	2208	2751	7.24723	-0.213574	0.0439525	transcription regulators
AT1G02090.1	243	298	330	85	482	583	5.07816	-0.0530976	0.908417	Proteasome component (PCI) domain protein
AT1G02090.2	241	290	321	79	470	575	5.04045	-0.0593454	0.802638	Proteasome component (PCI) domain protein
AT1G02090.3	254	297	339	84	491	597	5.10631	-0.0603802	0.811279	Proteasome component (PCI) domain protein
AT1G02100.1	251	298	291	84	451	544	4.90863	-0.0908158	0.702815	Leucine carboxyl methyltransferase
AT1G02100.2	234	267	262	77	424	517	4.7745	-0.0394003	1	Leucine carboxyl methyltransferase
AT1G02100.3	249	295	285	83	454	551	4.88864	-0.0615552	0.872742	Leucine carboxyl methyltransferase
AT1G02110.1	191	216	244	62	386	463	4.91351	0.0240327	1	Protein of unknown function (DUF630 and DUF632)
AT1G02120.1	545	591	695	155	824	1097	5.89165	-0.269022	0.00957312	GRAM domain family protein
AT1G02130.1	363	449	442	97	700	811	5.52401	-0.11311	0.302572	RAS 5
AT1G02140.1	766	797	879	200	1507	1787	6.60365	0.0292069	1	mago nashi family protein
AT1G02145.1	169	200	211	54	340	392	4.39769	-0.0207827	1	homolog of asparagine-linked glycosylation 12
AT1G02145.2	134	152	142	33	252	289	3.96055	-0.046929	0.813801	homolog of asparagine-linked glycosylation 12
AT1G02145.3	181	204	221	55	359	416	4.46425	-0.00848847	1	homolog of asparagine-linked glycosylation 12
AT1G02145.4	182	207	212	51	337	399	4.41499	-0.0762083	0.708588	homolog of asparagine-linked glycosylation 12
AT1G02150.1	889	943	1110	296	1767	2116	7.02803	0.0561716	0.700006	Tetratricopeptide repeat (TPR)-like superfamily protein
AT1G02160.1	106	147	127	27	201	221	4.00906	-0.225357	0.188939	Cox19 family protein (CHCH motif)
AT1G02160.2	88	125	107	24	174	206	3.82277	-0.131315	0.530075	Cox19 family protein (CHCH motif)
AT1G02170.1	176	192	195	64	358	465	4.43574	0.195294	0.189566	metacaspase 1
AT1G02180.1	38	21	39	8	76	75	2.45777	0.229056	0.692375	ferredoxin-related
AT1G02190.1	36	34	38	0	6	7	1.51039	-3.48466	2.22943e-18	Fatty acid hydroxylase superfamily
AT1G02190.2	35	34	37	0	5	7	1.43518	-3.56901	2.42974e-18	Fatty acid hydroxylase superfamily
AT1G02205.1	676	1075	1250	187	817	1121	6.51523	-0.849584	0.000339629	Fatty acid hydroxylase superfamily
AT1G02205.2	697	1108	1295	193	841	1155	6.55304	-0.852151	0.000318333	Fatty acid hydroxylase superfamily
AT1G02205.3	635	1006	1184	169	776	1077	6.41133	-0.856474	0.000294145	Fatty acid hydroxylase superfamily
AT1G02220.1	254	245	239	59	454	534	4.41105	-0.015349	1	NAC domain containing protein 3
AT1G02230.1	16	27	17	11	44	51	0.928861	0.418615	0.386604	NAC domain containing protein 4
AT1G02250.1	6	4	4	0	14	7	-0.458189	0.0721982	1	NAC domain containing protein 5
AT1G02260.1	150	147	155	34	213	280	3.95	-0.249303	0.147431	Divalent ion symporter
AT1G02270.1	208	204	225	56	283	356	4.50497	-0.330769	0.0122501	Calcium-binding endonuclease/exonuclease/phosphatase family
AT1G02280.1	474	561	598	156	951	1158	6.1428	0.0132378	1	translocon at the outer envelope membrane of chloroplasts 33
AT1G02280.2	462	548	584	146	906	1109	6.09549	-0.0230251	1	translocon at the outer envelope membrane of chloroplasts 33
AT1G02290.1	77	95	121	29	175	169	3.4771	-0.101481	0.852898	unknown protein
AT1G02300.1	107	82	125	17	158	157	3.7671	-0.399988	0.0741457	Cysteine proteinases superfamily protein
AT1G02305.1	796	781	845	223	1301	1702	6.28849	-0.0518819	0.783959	Cysteine proteinases superfamily protein
AT1G02310.1	29	24	18	6	49	61	1.54369	0.195296	0.904201	Glycosyl hydrolase superfamily protein
AT1G02320.1	0	0	0	0	0	0	-2.67564	5.12548e-15	1	unknown protein
AT1G02330.1	218	246	279	48	462	558	4.92592	0.0265458	1	unknown protein
AT1G02335.1	172	186	217	46	256	338	4.18003	-0.299109	0.215057	germin-like protein subfamily 2 member 2 precursor
AT1G02340.1	316	304	351	44	224	258	5.0151	-1.31449	1.06188e-15	basic helix-loop-helix (bHLH) DNA-binding superfamily protein
AT1G02350.1	10	14	7	2	18	19	0.540575	-0.142312	1	protoporphyrinogen oxidase-related
AT1G02360.1	240	264	205	71	561	727	4.57562	0.383175	0.26117	Chitinase family protein
AT1G02370.1	65	88	70	15	136	152	3.33177	-0.0435635	0.921314	Tetratricopeptide repeat (TPR)-like superfamily protein
AT1G02380.1	11	24	30	6	44	50	1.71078	0.161463	0.865233	unknown protein
AT1G02390.1	18	28	29	3	45	53	1.73945	-0.0727925	0.8844	glycerol-3-phosphate acyltransferase 2
AT1G02400.1	51	62	47	20	117	165	2.56396	0.437704	0.177282	gibberellin 2-oxidase 6
AT1G02405.1	0	0	2	1	0	0	-1.84525	-1.12631	1	proline-rich family protein
AT1G02410.1	161	171	211	50	341	430	4.39406	0.129369	0.487326	cytochrome c oxidase assembly protein CtaG / Cox11 family
AT1G02420.1	26	33	45	8	55	85	2.14368	0.0432945	1	Pentatricopeptide repeat (PPR) superfamily protein
AT1G02430.1	15	13	10	8	23	26	0.902576	0.1344	0.792186	ADP-ribosylation factor D1B
AT1G02440.1	5	1	4	0	1	6	-1.28628	-0.999031	0.489175	ADP-ribosylation factor D1A
AT1G02450.1	7	7	7	0	3	8	-0.438321	-1.39002	0.0548544	NIM1-interacting 1
AT1G02460.1	26	18	24	11	75	113	1.88897	1.05646	0.000719332	Pectin lyase-like superfamily protein
AT1G02470.1	6	8	11	1	8	19	-0.0847285	-0.321481	0.771714	Polyketide cyclase/dehydrase and lipid transport superfamily protein
AT1G02470.2	6	6	10	1	7	17	-0.191217	-0.297805	0.823981	Polyketide cyclase/dehydrase and lipid transport superfamily protein
AT1G02475.1	439	425	583	105	667	880	5.48485	-0.280139	0.0104607	Polyketide cyclase/dehydrase and lipid transport superfamily protein
AT1G02490.1	0	1	0	0	0	0	-2.52347	-2.06071	1	unknown protein
AT1G02500.1	2882	3105	3040	1258	5788	7156	8.36146	0.293764	0.0096519	S-adenosylmethionine synthetase 1
AT1G02500.2	2743	2967	2914	1186	5522	6799	8.30081	0.28281	0.0113769	S-adenosylmethionine synthetase 1
AT1G02510.1	0	0	0	0	0	0	-2.52376	5.12548e-15	1	Outward rectifying potassium channel protein
AT1G02520.1	303	320	229	97	611	763	4.772	0.296458	0.528022	P-glycoprotein 11
AT1G02530.1	28	36	17	13	49	56	1.52155	0.170548	0.845056	P-glycoprotein 12
AT1G02560.1	1631	1841	2093	626	3474	4072	7.82676	0.133815	0.169132	nuclear encoded CLP protease 5
AT1G02570.1	4	0	1	0	7	14	-1.19417	1.41323	0.471207	unknown protein
AT1G02575.1	1	2	1	1	10	5	-1.53371	1.47641	0.250246	unknown protein
AT1G02580.1	0	3	2	1	6	7	-1.15357	0.980451	0.460514	SET domain-containing protein
AT1G02610.1	27	17	26	4	37	48	1.30894	-0.161929	0.838245	RING/FYVE/PHD zinc finger superfamily protein
AT1G02620.1	0	0	1	0	1	0	-2.17744	-0.331483	1	Ras-related small GTP-binding family protein
AT1G02630.1	9	7	13	2	11	9	-0.278609	-0.84199	0.300304	Nucleoside transporter family protein
AT1G02630.2	6	5	12	2	9	5	-0.565759	-0.951762	0.353866	Nucleoside transporter family protein
AT1G02640.1	109	108	96	22	234	254	3.71875	0.147704	0.884038	beta-xylosidase 2
AT1G02650.1	3	4	7	3	7	12	-0.522516	0.267937	0.914767	Tetratricopeptide repeat (TPR)-like superfamily protein
AT1G02660.1	37	37	53	9	99	154	2.76468	0.440137	0.542576	alpha/beta-Hydrolases superfamily protein
AT1G02670.1	16	25	26	2	27	17	1.29114	-0.993845	0.0180189	P-loop containing nucleoside triphosphate hydrolases superfamily protein
AT1G02680.1	73	89	91	15	136	189	3.28429	-0.0594106	0.739577	TBP-associated factor 13
AT1G02681.1	0	0	0	0	0	0	-2.67561	5.12548e-15	1	pseudogene
AT1G02690.1	152	168	175	42	377	394	4.46405	0.22856	0.300304	importin alpha isoform 6
AT1G02690.2	144	161	160	37	358	376	4.40006	0.232641	0.345544	importin alpha isoform 6
AT1G02700.1	11	6	9	9	19	30	0.524776	0.762793	0.117257	unknown protein
AT1G02710.1	5	7	11	13	28	37	0.520389	1.38224	0.000845331	glycine-rich protein
AT1G02720.1	83	110	122	55	212	260	3.82186	0.329786	0.0284979	galacturonosyltransferase 5
AT1G02720.2	59	84	99	51	167	207	3.4692	0.436679	0.0115613	galacturonosyltransferase 5
AT1G02730.1	323	388	422	114	820	898	5.67628	0.22237	0.129278	cellulose synthase-like D5
AT1G02740.1	59	76	62	17	115	143	2.93258	0.0125949	1	MRG family protein
AT1G02750.1	100	106	79	27	171	192	3.30107	-0.0120005	1	Drought-responsive family protein
AT1G02750.2	85	81	59	22	121	150	2.94965	-0.0824698	0.934043	Drought-responsive family protein
AT1G02770.1	1	3	8	0	9	5	-0.95916	-0.236674	0.805231	Protein of unknown function (DUF626)
AT1G02780.1	4956	5464	5807	1527	11901	13737	9.52982	0.220273	0.00559281	Ribosomal protein L19e family protein
AT1G02800.1	43	47	60	7	60	68	2.75747	-0.617113	0.013698	cellulase 2
AT1G02810.1	78	74	72	24	201	219	3.05233	0.484784	0.109801	Plant invertase/pectin methylesterase inhibitor superfamily
AT1G02813.1	0	1	0	0	3	3	-1.35022	1.76246	0.712428	Protein of unknown function, DUF538
AT1G02816.1	159	186	191	44	289	369	3.8857	-0.0840594	0.744431	Protein of unknown function, DUF538
AT1G02820.1	295	325	387	92	467	551	5.10763	-0.262578	0.31067	Late embryogenesis abundant 3 (LEA3) family protein
AT1G02830.1	0	0	1	0	1	0	-2.386	-0.33176	1	Ribosomal L22e protein family
AT1G02840.1	744	781	920	205	1457	1776	6.67022	0.0121075	1	RNA-binding (RRM/RBD/RNP motifs) family protein
AT1G02840.2	766	817	935	212	1479	1830	6.71613	0.0038729	1	RNA-binding (RRM/RBD/RNP motifs) family protein
AT1G02840.3	708	757	895	201	1391	1707	6.61842	0.00755562	1	RNA-binding (RRM/RBD/RNP motifs) family protein
AT1G02850.1	217	394	616	75	354	546	4.57354	-0.734016	0.00572409	beta glucosidase 11
AT1G02850.2	216	391	614	76	353	545	4.57364	-0.723448	0.00697622	beta glucosidase 11
AT1G02850.3	210	386	602	75	347	532	4.54831	-0.723207	0.00702283	beta glucosidase 11
AT1G02850.4	207	374	588	78	336	532	4.52743	-0.685117	0.0126308	beta glucosidase 11
AT1G02850.5	218	396	625	79	362	550	4.60449	-0.710875	0.00842942	beta glucosidase 11
AT1G02860.1	71	70	84	6	123	153	3.05759	-0.219521	0.302985	SPX (SYG1/Pho81/XPR1) domain-containing protein
AT1G02860.2	64	58	81	6	116	139	2.91702	-0.163707	0.437494	SPX (SYG1/Pho81/XPR1) domain-containing protein
AT1G02870.1	124	125	131	52	289	342	4.29082	0.390179	0.00387835	unknown protein
AT1G02880.1	115	136	143	61	253	352	3.90932	0.336772	0.0466895	thiamin pyrophosphokinase1
AT1G02880.2	119	142	146	61	260	357	3.94892	0.311735	0.0610242	thiamin pyrophosphokinase1
AT1G02880.3	120	143	152	65	268	370	3.98129	0.344237	0.0383373	thiamin pyrophosphokinase1
AT1G02880.4	120	139	145	63	257	354	3.95356	0.322826	0.0592186	thiamin pyrophosphokinase1
AT1G02890.1	903	976	980	227	1441	1839	6.55416	-0.182115	0.0592001	AAA-type ATPase family protein
AT1G02890.2	856	926	918	214	1360	1728	6.45883	-0.186424	0.0620186	AAA-type ATPase family protein
AT1G02900.1	174	169	170	44	362	454	4.12717	0.237464	0.321392	rapid alkalinization factor 1
AT1G02910.1	460	513	614	91	784	904	5.77782	-0.336159	0.0023791	tetratricopeptide repeat (TPR)-containing protein
AT1G02920.1	1484	2034	1407	463	2565	3243	6.77819	-0.0908383	0.982512	glutathione S-transferase 7
AT1G02930.1	1089	1521	1146	291	1733	2447	6.30362	-0.240557	0.67249	glutathione S-transferase 6
AT1G02930.2	983	1376	1030	253	1574	2251	6.1521	-0.243688	0.65801	glutathione S-transferase 6
AT1G02940.1	1	4	4	1	5	11	-1.16924	0.435876	0.91309	glutathione S-transferase (class phi) 5
AT1G02950.1	66	59	78	19	137	163	3.02967	0.184167	0.575243	glutathione S-transferase F4
AT1G02950.2	63	55	77	18	127	151	2.9438	0.136056	0.755864	glutathione S-transferase F4
AT1G02950.3	59	52	71	18	128	157	2.90711	0.265486	0.371029	glutathione S-transferase F4
AT1G02950.4	58	50	67	13	114	127	2.74233	0.0661586	1	glutathione S-transferase F4
AT1G02960.1	146	128	165	22	179	244	3.84817	-0.464642	0.00145819	unknown protein
AT1G02960.2	147	131	165	24	188	250	3.8911	-0.423421	0.00597736	unknown protein
AT1G02960.3	144	142	167	25	191	251	3.89293	-0.434005	0.00258467	unknown protein
AT1G02965.1	0	0	0	0	0	0	-2.69867	5.12548e-15	1	unknown protein
AT1G02970.1	56	39	52	13	82	99	2.54527	-0.0634857	0.96204	WEE1 kinase homolog
AT1G02980.1	0	3	2	2	3	3	-1.58697	0.223659	0.842368	cullin 2
AT1G02990.1	251	296	304	55	385	486	4.71164	-0.350446	0.00111294	unknown protein
AT1G02990.2	259	300	311	55	390	498	4.73883	-0.357188	0.000581432	unknown protein
AT1G02990.3	262	304	315	57	399	504	4.76595	-0.347883	0.000742034	unknown protein
AT1G03000.1	254	295	320	72	453	546	5.01762	-0.160468	0.211304	peroxin 6
AT1G03010.1	9	11	13	4	28	33	0.481504	0.51052	0.383745	Phototropic-responsive NPH3 family protein
AT1G03020.1	16	12	16	0	3	3	-0.145416	-3.25183	2.26409e-08	Thioredoxin superfamily protein
AT1G03030.1	119	154	183	42	251	267	3.85325	-0.157029	0.456069	P-loop containing nucleoside triphosphate hydrolases superfamily protein
AT1G03040.1	347	348	416	79	533	629	5.26437	-0.305716	0.00119115	basic helix-loop-helix (bHLH) DNA-binding superfamily protein
AT1G03040.2	327	327	400	75	509	611	5.18668	-0.285309	0.0033886	basic helix-loop-helix (bHLH) DNA-binding superfamily protein
AT1G03050.1	1	0	1	1	0	0	-2.22614	-1.12832	1	ENTH/ANTH/VHS superfamily protein
AT1G03055.1	86	86	125	16	103	153	3.29309	-0.598101	0.00163875	unknown protein
AT1G03055.2	78	80	117	14	93	143	3.17929	-0.61052	0.00144507	unknown protein
AT1G03060.1	616	748	777	207	1238	1603	6.22993	0.0457902	0.864142	Beige/BEACH domain ;WD domain, G-beta repeat protein
AT1G03070.1	24	28	14	6	29	37	1.17065	-0.334094	0.614408	Bax inhibitor-1 family protein
AT1G03070.2	21	28	16	5	31	39	1.12124	-0.260293	0.64196	Bax inhibitor-1 family protein
AT1G03080.1	806	884	933	207	1406	1846	6.47214	-0.0981354	0.500558	kinase interacting (KIP1-like) family protein
AT1G03090.1	185	197	224	61	400	479	4.4803	0.165313	0.446804	methylcrotonyl-CoA carboxylase alpha chain, mitochondrial / 3-methylcrotonyl-CoA carboxylase 1 (MCCA)
AT1G03090.2	190	202	239	65	423	503	4.54387	0.186037	0.355664	methylcrotonyl-CoA carboxylase alpha chain, mitochondrial / 3-methylcrotonyl-CoA carboxylase 1 (MCCA)
AT1G03100.1	42	32	28	9	54	71	2.10243	-0.0741451	0.965394	Pentatricopeptide repeat (PPR) superfamily protein
AT1G03106.1	2	0	0	0	1	3	-1.24454	0.379797	1	unknown protein
AT1G03110.1	163	174	157	44	313	381	4.41436	0.10377	0.741655	Transducin/WD40 repeat-like superfamily protein
AT1G03120.1	1	4	3	0	5	7	-0.967472	0.106356	1	responsive to abscisic acid 28
AT1G03130.1	8883	9488	11088	2581	14559	18387	9.95933	-0.165605	0.0580265	photosystem I subunit D-2
AT1G03140.1	338	404	398	92	631	781	5.40098	-0.072538	0.546888	splicing factor Prp18 family protein
AT1G03150.1	157	171	173	44	290	315	4.2059	-0.0873395	0.68229	Acyl-CoA N-acyltransferases (NAT) superfamily protein
AT1G03160.1	536	573	664	159	826	1085	6.03865	-0.222781	0.045933	FZO-like
AT1G03160.2	516	534	639	150	794	1038	5.97011	-0.217712	0.0545731	FZO-like
AT1G03170.1	14	12	26	1	13	14	0.76765	-1.34356	0.00359353	Protein of unknown function (DUF3049)
AT1G03180.1	29	33	36	13	51	72	2.03369	0.023302	0.972522	unknown protein
AT1G03180.2	30	33	41	15	55	74	2.10954	0.0277454	0.910828	unknown protein
AT1G03190.1	125	102	123	22	166	196	3.65783	-0.339449	0.0501396	RAD3-like DNA-binding helicase protein
AT1G03190.2	122	100	118	21	161	191	3.60986	-0.340178	0.0502767	RAD3-like DNA-binding helicase protein
AT1G03200.1	22	27	20	5	24	31	0.992566	-0.658938	0.106177	unknown protein
AT1G03210.1	93	103	98	36	198	277	3.54167	0.331198	0.0871517	Phenazine biosynthesis PhzC/PhzF protein
AT1G03220.1	1246	1445	1303	678	4121	5362	7.47022	0.869096	0.00027458	Eukaryotic aspartyl protease family protein
AT1G03230.1	216	285	234	118	694	858	5.08956	0.727251	2.31706e-06	Eukaryotic aspartyl protease family protein
AT1G03240.1	1	3	2	1	5	3	-1.50301	0.1518	1	unknown protein
AT1G03250.1	205	209	256	54	348	444	4.68889	-0.130514	0.383351	unknown protein
AT1G03250.2	190	195	245	47	319	416	4.59407	-0.159409	0.266441	unknown protein
AT1G03260.1	63	72	80	22	136	158	3.11106	0.0935697	0.761125	SNARE associated Golgi protein family
AT1G03270.1	28	35	54	11	73	79	2.29637	0.0243612	1	CBS domain-containing protein with a domain of unknown function (DUF21)
AT1G03280.1	356	383	486	59	566	704	5.41324	-0.38663	0.000108538	Transcription factor TFIIE, alpha subunit
AT1G03290.1	297	288	342	57	381	540	4.69407	-0.406937	0.000573045	unknown protein
AT1G03290.2	323	318	361	58	402	571	4.7827	-0.448869	9.7297e-05	unknown protein
AT1G03300.1	43	48	43	3	61	82	2.59661	-0.384174	0.107023	DOMAIN OF UNKNOWN FUNCTION 724 1
AT1G03310.1	605	641	861	213	1091	1362	6.35032	-0.0769707	0.785664	debranching enzyme 1
AT1G03310.2	608	648	881	214	1099	1371	6.36063	-0.086861	0.734475	debranching enzyme 1
AT1G03320.1	3	0	4	0	2	2	-1.41456	-1.18673	0.412278	unknown protein
AT1G03330.1	203	213	273	64	457	463	4.77997	0.0569542	0.846379	Small nuclear ribonucleoprotein family protein
AT1G03340.1	22	23	17	10	30	49	1.45071	0.0784409	0.892723	unknown protein
AT1G03350.1	405	440	445	90	686	840	5.47247	-0.163201	0.127641	BSD domain-containing protein
AT1G03360.1	110	100	140	30	227	291	4.02923	0.170094	0.533972	ribosomal RNA processing 4
AT1G03365.1	189	196	218	43	309	367	4.42538	-0.211638	0.0663326	RING/U-box superfamily protein
AT1G03370.1	284	275	275	68	446	570	4.74864	-0.103793	0.609273	C2 calcium/lipid-binding and GRAM domain containing protein
AT1G03380.1	637	633	649	161	904	1182	5.79126	-0.233876	0.0199238	homolog of yeast autophagy 18 (ATG18) G
AT1G03390.1	0	1	0	1	0	0	-1.6423	-0.147462	1	HXXXD-type acyl-transferase family protein
AT1G03400.1	194	209	248	52	228	345	4.0491	-0.506326	0.00107034	2-oxoglutarate (2OG) and Fe(II)-dependent oxygenase superfamily protein
AT1G03410.1	254	280	331	62	465	524	5.11105	-0.185952	0.0830347	2-oxoglutarate (2OG) and Fe(II)-dependent oxygenase superfamily protein
AT1G03430.1	145	142	170	33	209	235	4.01444	-0.399086	0.00217981	histidine-containing phosphotransfer factor 5
AT1G03440.1	236	268	324	57	363	416	4.63424	-0.443165	0.000240957	Leucine-rich repeat (LRR) family protein
AT1G03445.1	0	3	1	0	6	7	-1.00222	1.15255	0.681128	Serine/threonine protein phosphatase family protein
AT1G03457.1	78	80	75	17	128	203	3.1771	0.0593928	1	RNA-binding (RRM/RBD/RNP motifs) family protein
AT1G03457.2	77	78	70	16	127	199	3.14181	0.0809078	1	RNA-binding (RRM/RBD/RNP motifs) family protein
AT1G03470.1	21	28	24	4	44	53	2.07559	0.00332418	1	Kinase interacting (KIP1-like) family protein
AT1G03470.2	21	29	25	4	42	55	2.06789	-0.0362922	0.964908	Kinase interacting (KIP1-like) family protein
AT1G03475.1	987	1138	1353	402	2224	2662	7.34461	0.181556	0.105906	Coproporphyrinogen III oxidase
AT1G03490.1	0	0	0	0	0	0	-2.67556	5.12548e-15	1	NAC domain containing protein 6
AT1G03495.1	80	101	118	42	144	205	3.91612	0.0157047	0.95462	HXXXD-type acyl-transferase family protein
AT1G03510.1	9	11	13	4	22	30	0.78092	0.298226	0.712906	Tetratricopeptide repeat (TPR)-like superfamily protein
AT1G03520.1	118	103	126	28	164	204	3.47988	-0.271618	0.1124	Core-2/I-branching beta-1,6-N-acetylglucosaminyltransferase family protein
AT1G03520.2	88	75	86	16	122	141	3.00445	-0.304473	0.121631	Core-2/I-branching beta-1,6-N-acetylglucosaminyltransferase family protein
AT1G03530.1	123	129	129	44	276	342	4.32098	0.329583	0.0595385	nuclear assembly factor 1
AT1G03540.1	14	20	26	3	33	29	1.33637	-0.34449	0.481797	Pentatricopeptide repeat (PPR-like) superfamily protein
AT1G03550.1	86	86	84	32	149	177	3.25466	0.048233	0.871794	Secretory carrier membrane protein (SCAMP) family protein
AT1G03560.1	116	115	137	20	137	196	3.64118	-0.539127	0.00198944	Pentatricopeptide repeat (PPR-like) superfamily protein
AT1G03580.1	7	3	2	2	7	3	-0.87824	-0.428589	1	pseudogene
AT1G03590.1	206	222	290	55	378	439	4.52922	-0.183032	0.206569	Protein phosphatase 2C family protein
AT1G03600.1	3467	3804	4396	998	5992	7000	8.72909	-0.178316	0.0848997	photosystem II family protein
AT1G03610.1	245	293	286	56	377	469	4.62391	-0.339685	0.00273597	Protein of unknown function (DUF789)
AT1G03620.1	12	26	16	6	16	30	0.925034	-0.49189	0.553208	ELMO/CED-12 family protein
AT1G03630.1	1840	2091	2324	594	3387	4359	7.97424	-0.0333683	0.91434	protochlorophyllide oxidoreductase C
AT1G03630.2	1746	1992	2208	555	3215	4109	7.89966	-0.0454896	0.817545	protochlorophyllide oxidoreductase C
AT1G03650.1	21	13	19	4	30	33	1.14057	-0.129063	0.953668	Acyl-CoA N-acyltransferases (NAT) superfamily protein
AT1G03660.1	8	4	8	2	15	12	-0.380768	0.0812941	1	Ankyrin-repeat containing protein
AT1G03670.1	0	0	1	0	0	0	-2.6084	-2.05726	1	ankyrin repeat family protein
AT1G03680.1	1867	2053	2322	659	3301	3944	7.90392	-0.0539621	0.821362	thioredoxin M-type 1
AT1G03687.1	84	107	125	27	208	294	3.92839	0.265843	0.20539	DTW domain-containing protein
AT1G03687.2	76	103	115	22	180	260	3.76696	0.165828	0.658079	DTW domain-containing protein
AT1G03700.1	11	22	13	3	53	56	1.06501	0.714905	0.31119	Uncharacterised protein family (UPF0497)
AT1G03710.1	3	2	10	0	2	4	-0.630376	-1.72644	0.0833464	Cystatin/monellin superfamily protein
AT1G03710.2	3	0	6	0	1	3	-0.898146	-1.55471	0.272362	Cystatin/monellin superfamily protein
AT1G03720.1	1	0	0	0	0	0	-2.60837	-2.06406	1	Cysteine proteinases superfamily protein
AT1G03730.1	38	52	54	24	119	150	2.81955	0.56898	0.00313376	unknown protein
AT1G03740.1	322	318	342	75	522	708	4.93732	-0.0836538	0.609589	Protein kinase superfamily protein
AT1G03740.2	305	304	327	74	494	686	4.87743	-0.0692669	0.709328	Protein kinase superfamily protein
AT1G03750.1	84	74	66	9	97	129	2.87109	-0.425554	0.0261763	switch 2
AT1G03760.1	33	62	53	16	89	138	2.89344	0.246295	0.425771	Prefoldin chaperone subunit family protein
AT1G03770.1	71	46	68	12	87	123	2.81663	-0.218422	0.423792	RING 1B
AT1G03770.2	60	39	60	12	83	117	2.69497	-0.0643599	0.910828	RING 1B
AT1G03770.3	64	40	62	12	84	116	2.70637	-0.126748	0.735139	RING 1B
AT1G03780.1	98	79	72	24	167	192	3.57842	0.14666	0.701529	targeting protein for XKLP2
AT1G03780.2	139	113	115	38	233	250	4.01124	0.048011	0.944015	targeting protein for XKLP2
AT1G03780.3	134	107	108	36	220	239	3.927	0.0455733	0.955757	targeting protein for XKLP2
AT1G03790.1	2	1	4	1	0	1	-1.44306	-1.87298	0.731809	Zinc finger C-x8-C-x5-C-x3-H type family protein
AT1G03800.1	0	0	4	4	8	13	-0.704704	2.13188	0.0115741	ERF domain protein 10
AT1G03810.1	0	1	0	0	0	0	-2.72203	-2.06106	1	Nucleic acid-binding, OB-fold-like protein
AT1G03820.1	229	164	235	63	391	453	4.70526	0.0701957	0.805514	unknown protein
AT1G03830.1	94	132	112	28	223	281	4.00666	0.172837	0.564237	guanylate-binding family protein
AT1G03830.2	98	137	114	28	241	300	4.07735	0.220359	0.38942	guanylate-binding family protein
AT1G03840.1	35	34	31	19	78	97	2.02461	0.526616	0.0720453	C2H2 and C2HC zinc fingers superfamily protein
AT1G03840.2	33	31	29	16	71	92	1.90741	0.497187	0.0951069	C2H2 and C2HC zinc fingers superfamily protein
AT1G03850.1	70	84	72	31	180	260	3.16644	0.576958	0.059756	Glutaredoxin family protein
AT1G03850.2	93	106	92	34	234	330	3.50084	0.523707	0.0868948	Glutaredoxin family protein
AT1G03860.1	458	499	547	200	1044	1294	6.00451	0.316021	0.000262472	prohibitin 2
AT1G03860.2	427	467	511	185	972	1205	5.90958	0.309035	0.000562968	prohibitin 2
AT1G03860.3	432	469	511	183	946	1183	5.89417	0.271233	0.002382	prohibitin 2
AT1G03870.1	606	643	639	284	2017	2447	6.48226	0.816502	0.00382194	FASCICLIN-like arabinoogalactan 9
AT1G03880.1	6	0	0	0	0	0	-2.56466	-4.37705	0.192457	cruciferin 2
AT1G03900.1	552	538	653	163	1058	1304	5.98407	0.0636066	0.748303	non-intrinsic ABC protein 4
AT1G03905.1	44	33	59	13	104	93	2.1851	0.170084	0.788583	P-loop containing nucleoside triphosphate hydrolases superfamily protein
AT1G03910.1	429	479	526	93	776	1016	5.70911	-0.110839	0.26289	unknown protein
AT1G03910.2	453	509	550	96	803	1051	5.80536	-0.139896	0.1503	unknown protein
AT1G03920.1	51	40	48	11	78	95	2.16906	-0.0698435	0.956444	Protein kinase family protein
AT1G03930.1	379	364	497	104	688	787	5.46034	-0.111899	0.40265	dual specificity kinase 1
AT1G03940.1	80	117	106	46	133	202	3.85901	-0.0304955	1	HXXXD-type acyl-transferase family protein
AT1G03950.1	105	114	115	31	185	221	3.50204	-0.0734602	0.850468	vacuolar protein sorting-associated protein 2.3
AT1G03960.1	90	116	117	29	182	187	3.76905	-0.155978	0.518949	Calcium-binding EF hand family protein
AT1G03960.2	94	115	126	29	190	183	3.78002	-0.193011	0.362994	Calcium-binding EF hand family protein
AT1G03970.1	132	171	188	32	264	312	4.03276	-0.165126	0.266387	G-box binding factor 4
AT1G03980.1	90	99	117	18	157	194	3.38316	-0.201562	0.209488	phytochelatin synthase 2
AT1G03982.1	0	0	0	0	0	0	-2.72209	5.12548e-15	1	PAK-box/P21-Rho-binding family protein
AT1G03990.1	28	40	41	7	39	39	1.46258	-0.806682	0.0180963	Long-chain fatty alcohol dehydrogenase family protein
AT1G04000.1	76	78	89	29	144	170	3.31897	0.0441719	0.853888	unknown protein
AT1G04010.1	101	125	119	37	209	217	3.61199	-0.0285321	1	phospholipid sterol acyl transferase 1
AT1G04020.1	119	133	172	34	264	292	4.02949	0.0113423	1	breast cancer associated RING 1
AT1G04020.2	120	133	166	33	264	293	4.03948	0.0259967	1	breast cancer associated RING 1
AT1G04030.1	124	126	121	46	355	388	4.08928	0.611129	6.23323e-05	unknown protein
AT1G04040.1	548	558	498	282	1877	2391	6.32531	0.999387	5.07506e-11	HAD superfamily, subfamily IIIB acid phosphatase
AT1G04050.1	48	51	42	8	89	99	2.58407	-0.00518707	0.969192	homolog of SU(var)3-9 1
AT1G04070.1	78	72	68	9	119	139	3.06722	-0.202926	0.27794	translocase of outer membrane 22-I
AT1G04080.1	926	999	1129	263	1724	2027	6.85905	-0.0713389	0.470348	Tetratricopeptide repeat (TPR)-like superfamily protein
AT1G04080.2	693	748	843	191	1282	1457	6.4458	-0.104709	0.259628	Tetratricopeptide repeat (TPR)-like superfamily protein
AT1G04080.3	920	998	1117	258	1717	2002	6.8517	-0.0770269	0.418813	Tetratricopeptide repeat (TPR)-like superfamily protein
AT1G04090.1	10	10	6	2	17	14	-0.143774	-0.11735	1	Plant protein of unknown function (DUF946)
AT1G04100.1	18	55	36	5	51	65	1.89147	-0.34085	0.357118	indoleacetic acid-induced protein 10
AT1G04110.1	37	48	60	13	84	105	2.84575	0.0157381	1	Subtilase family protein
AT1G04120.1	937	1135	1189	335	1964	2391	6.81574	0.0783191	0.63253	multidrug resistance-associated protein 5
AT1G04120.2	917	1111	1172	328	1896	2332	6.77896	0.0658519	0.717254	multidrug resistance-associated protein 5
AT1G04130.1	96	95	91	34	164	216	3.45436	0.0975236	0.646657	Tetratricopeptide repeat (TPR)-like superfamily protein
AT1G04140.1	808	876	989	272	1501	1884	6.55893	0.0061039	1	Transducin family protein / WD-40 repeat family protein
AT1G04140.2	777	865	970	270	1457	1841	6.51429	0.00784147	0.992536	Transducin family protein / WD-40 repeat family protein
AT1G04150.1	5	3	6	1	8	11	-0.326019	0.0433399	1	C2 calcium/lipid-binding plant phosphoribosyltransferase family protein
AT1G04160.1	142	165	199	53	267	358	4.27464	-0.033176	1	myosin XI B
AT1G04170.1	896	987	1044	358	2032	2429	6.99918	0.274749	0.000115522	eukaryotic translation initiation factor 2 gamma subunit
AT1G04180.1	14	16	25	8	47	51	0.954328	0.512146	0.401491	YUCCA 9
AT1G04190.1	310	307	356	86	594	716	5.30161	0.0473235	0.939186	Tetratricopeptide repeat (TPR)-like superfamily protein
AT1G04200.1	222	252	263	93	476	572	4.84611	0.187619	0.106193	unknown protein
AT1G04210.1	523	549	626	138	963	1134	5.97541	-0.076149	0.502939	Leucine-rich repeat protein kinase family protein
AT1G04220.1	208	250	225	93	393	529	4.49071	0.187976	0.469587	3-ketoacyl-CoA synthase 2
AT1G04230.1	96	99	122	25	191	221	3.48583	-0.00265714	1	Protein of unknown function (DUF2361)
AT1G04240.1	226	207	268	41	394	513	4.92968	-0.0889144	0.575543	AUX/IAA transcriptional regulator family protein
AT1G04250.1	529	524	618	164	1265	1576	6.12288	0.33562	0.0072394	AUX/IAA transcriptional regulator family protein
AT1G04260.1	83	95	87	25	141	184	3.49708	-0.0618076	0.937682	CAMV movement protein interacting protein 7
AT1G04270.1	2272	2581	2713	711	5713	6699	8.41836	0.267333	0.00211227	cytosolic ribosomal protein S15
AT1G04270.2	1908	2177	2267	577	4838	5620	8.16578	0.261727	0.00552641	cytosolic ribosomal protein S15
AT1G04280.1	278	323	278	89	538	713	4.87437	0.131246	0.611995	P-loop containing nucleoside triphosphate hydrolases superfamily protein
AT1G04290.1	206	206	219	45	369	387	4.51838	-0.1287	0.364252	Thioesterase superfamily protein
AT1G04300.1	546	569	640	145	953	1303	5.9778	-0.0322414	0.821315	TRAF-like superfamily protein
AT1G04300.2	524	556	627	143	937	1284	5.9472	-0.0136307	0.96043	TRAF-like superfamily protein
AT1G04300.3	533	560	632	142	947	1290	5.95929	-0.0215052	0.89138	TRAF-like superfamily protein
AT1G04300.4	531	554	624	140	924	1265	5.93784	-0.0383618	0.777176	TRAF-like superfamily protein
AT1G04310.1	60	88	60	10	102	108	2.73476	-0.412681	0.1124	ethylene response sensor 2
AT1G04330.1	13	17	12	4	30	32	0.610881	0.182242	0.898593	unknown protein
AT1G04340.1	144	143	153	45	322	402	4.15799	0.328365	0.0424026	HR-like lesion-inducing protein-related
AT1G04350.1	683	690	842	169	874	1049	6.06746	-0.515145	3.08581e-08	2-oxoglutarate (2OG) and Fe(II)-dependent oxygenase superfamily protein
AT1G04360.1	38	42	33	21	114	138	2.27575	0.819656	0.00242265	RING/U-box superfamily protein
AT1G04370.1	0	0	1	0	1	4	-1.91167	1.56505	0.87721	Ethylene-responsive element binding factor 14
AT1G04380.1	0	3	0	0	0	2	-1.74613	-0.918802	0.876509	2-oxoglutarate (2OG) and Fe(II)-dependent oxygenase superfamily protein
AT1G04390.1	89	118	117	20	151	141	3.47841	-0.511034	0.00531358	BTB/POZ domain-containing protein
AT1G04400.1	1160	1206	1396	244	1809	2328	6.87867	-0.283627	0.000352449	cryptochrome 2
AT1G04400.2	1102	1126	1316	232	1716	2190	6.80373	-0.276867	0.000477114	cryptochrome 2
AT1G04410.1	4505	4846	5233	2047	11656	14444	9.31298	0.50963	2.83567e-15	Lactate/malate dehydrogenase family protein
AT1G04420.1	825	939	1149	245	1672	1998	6.74126	-0.0504838	0.820461	NAD(P)-linked oxidoreductase superfamily protein
AT1G04430.1	760	994	1090	319	1928	2494	6.89146	0.275287	0.0168968	S-adenosyl-L-methionine-dependent methyltransferases superfamily protein
AT1G04430.2	727	940	1042	309	1862	2384	6.83072	0.290496	0.0102873	S-adenosyl-L-methionine-dependent methyltransferases superfamily protein
AT1G04440.1	461	510	555	167	842	1023	5.66225	-0.0132122	1	casein kinase like 13
AT1G04445.1	1	0	0	1	1	0	-2.33033	0.589026	0.899746	C2H2-like zinc finger protein
AT1G04457.1	19	14	17	3	32	35	1.19253	0.0120327	1	pseudogene
AT1G04470.1	0	0	0	0	0	1	-2.63066	1.71621	1	Protein of unknown function (DUF810)
AT1G04480.1	991	1122	1286	325	2841	3048	7.34851	0.350677	0.00057365	Ribosomal protein L14p/L23e family protein
AT1G04490.1	17	19	10	4	23	28	0.714296	-0.207063	0.826952	Protein of unknown function (DUF3527)
AT1G04490.2	17	19	10	4	23	28	0.742245	-0.207271	0.830171	Protein of unknown function (DUF3527)
AT1G04500.1	0	0	1	3	0	5	-1.70965	2.43394	0.145786	CCT motif family protein
AT1G04510.1	450	553	591	180	1032	1209	6.04296	0.159725	0.127193	MOS4-associated complex 3A
AT1G04510.2	438	542	578	177	1000	1170	6.00947	0.151069	0.163355	MOS4-associated complex 3A
AT1G04520.1	213	258	311	71	545	589	4.94069	0.156784	0.322809	plasmodesmata-located protein 2
AT1G04530.1	1192	1191	1390	155	1525	1838	6.62639	-0.66089	5.32523e-10	Tetratricopeptide repeat (TPR)-like superfamily protein
AT1G04540.1	32	41	52	16	79	73	1.95092	-0.00499581	1	Calcium-dependent lipid-binding (CaLB domain) family protein
AT1G04550.1	263	234	266	38	358	457	4.76323	-0.338098	0.0025022	AUX/IAA transcriptional regulator family protein
AT1G04550.2	308	283	334	49	414	521	5.00293	-0.400522	0.000132586	AUX/IAA transcriptional regulator family protein
AT1G04555.1	38	44	61	14	78	79	2.20992	-0.195125	0.699509	unknown protein
AT1G04560.1	2	1	1	1	0	0	-1.12927	-1.86188	0.956317	AWPM-19-like family protein
AT1G04570.1	19	27	32	9	26	35	1.58177	-0.60384	0.235906	Major facilitator superfamily protein
AT1G04580.1	0	1	12	1	3	1	-1.78148	-1.60895	0.492115	aldehyde oxidase 4
AT1G04590.1	204	196	252	38	385	411	4.74898	-0.133414	0.292746	unknown protein
AT1G04590.2	186	180	230	36	358	388	4.64732	-0.0936927	0.461385	unknown protein
AT1G04600.1	10	11	13	2	18	21	0.174735	-0.192617	0.872742	myosin XI A
AT1G04610.1	33	28	17	7	71	106	1.622	0.690998	0.123148	YUCCA 3
AT1G04620.1	105	118	122	55	256	291	3.7474	0.373487	0.0133746	coenzyme F420 hydrogenase family / dehydrogenase, beta subunit family
AT1G04625.1	0	2	0	0	2	0	-1.91142	-0.384803	1	Polynucleotidyl transferase, ribonuclease H-like superfamily protein
AT1G04630.1	355	322	341	67	592	737	5.38219	-0.0523479	0.617493	GRIM-19 protein
AT1G04635.1	26	22	21	5	43	49	1.61445	0.0207126	1	ribonuclease P family protein / Rpp14 family protein
AT1G04640.1	203	236	284	85	438	551	4.77543	0.125206	0.323415	lipoyltransferase 2
AT1G04640.2	166	206	232	76	360	456	4.53004	0.12353	0.331892	lipoyltransferase 2
AT1G04645.1	0	0	0	0	0	0	-2.31343	5.12548e-15	1	Plant self-incompatibility protein S1 family
AT1G04650.1	49	52	41	13	71	72	2.67377	-0.320407	0.359942	unknown protein
AT1G04660.1	1	5	6	1	6	10	-0.494724	0.036542	1	glycine-rich protein
AT1G04670.1	0	0	0	0	2	0	-2.60861	2.49177	1	unknown protein
AT1G04680.1	703	721	820	295	1643	2009	6.61243	0.374624	4.0444e-05	Pectin lyase-like superfamily protein
AT1G04690.1	779	820	914	194	1342	1674	6.452	-0.131486	0.188997	potassium channel beta subunit 1
AT1G04700.1	24	30	27	11	69	100	1.79685	0.683139	0.00937738	PB1 domain-containing protein tyrosine kinase
AT1G04710.1	246	245	318	59	466	576	4.99771	-0.0362877	0.780582	peroxisomal 3-ketoacyl-CoA thiolase 4
AT1G04730.1	78	87	90	18	150	178	3.39363	-0.0280602	0.915631	P-loop containing nucleoside triphosphate hydrolases superfamily protein
AT1G04750.1	674	697	787	182	1280	1531	6.28445	-0.00641014	1	vesicle-associated membrane protein 721
AT1G04750.2	515	508	583	137	981	1168	5.90041	0.0318922	1	vesicle-associated membrane protein 721
AT1G04760.1	11	20	23	4	34	32	1.17414	-0.0852734	0.989453	vesicle-associated membrane protein 726
AT1G04770.1	265	309	286	99	951	1180	5.20991	0.807681	4.78066e-07	Tetratricopeptide repeat (TPR)-like superfamily protein
AT1G04778.1	2	2	2	0	5	7	-1.03173	0.508196	1	unknown protein
AT1G04780.1	453	480	538	109	752	1036	5.53045	-0.127487	0.309994	Ankyrin repeat family protein
AT1G04790.1	201	241	232	63	389	473	4.65897	-0.00609857	1	RING/U-box superfamily protein
AT1G04800.1	415	443	534	101	812	1017	5.74858	-0.0451263	0.847439	glycine-rich protein
AT1G04810.1	500	573	608	158	1019	1356	5.9539	0.109975	0.490181	26S proteasome regulatory complex, non-ATPase subcomplex, Rpn2/Psmd1 subunit
AT1G04820.1	3558	3775	4004	1426	7666	8956	9.04889	0.262761	0.000401227	tubulin alpha-4 chain
AT1G04830.1	150	160	172	50	275	284	4.03068	-0.105592	0.791162	Ypt/Rab-GAP domain of gyp1p superfamily protein
AT1G04830.2	139	142	150	46	254	265	3.87927	-0.0567207	1	Ypt/Rab-GAP domain of gyp1p superfamily protein
AT1G04840.1	7	5	11	4	23	23	0.593939	0.669404	0.303928	Tetratricopeptide repeat (TPR)-like superfamily protein
AT1G04850.1	818	849	1031	232	1608	2026	6.66994	0.03076	1	ubiquitin-associated (UBA)/TS-N domain-containing protein
AT1G04860.1	344	400	403	72	605	751	5.37945	-0.173842	0.0649047	ubiquitin-specific protease 2
AT1G04870.1	229	232	255	70	560	598	5.02926	0.299534	0.0385846	protein arginine methyltransferase 10
AT1G04870.2	245	250	268	72	595	636	5.10596	0.286865	0.0591522	protein arginine methyltransferase 10
AT1G04880.1	8	5	2	3	4	11	-0.140044	-0.183706	1	HMG (high mobility group) box protein with ARID/BRIGHT DNA-binding domain
AT1G04900.1	104	100	108	22	201	229	3.77441	0.0558112	1	Protein of unknown function (DUF185)
AT1G04910.1	291	281	301	75	477	623	4.92789	-0.0432727	0.815762	O-fucosyltransferase family protein
AT1G04920.1	28	30	42	5	37	34	1.54963	-0.851333	0.00604944	sucrose phosphate synthase 3F
AT1G04930.1	25	25	26	5	64	66	2.04135	0.349593	0.559855	hydroxyproline-rich glycoprotein family protein
AT1G04930.2	19	24	25	4	62	60	1.94817	0.411502	0.414841	hydroxyproline-rich glycoprotein family protein
AT1G04940.1	393	483	526	191	1000	1038	6.01481	0.269008	0.0156447	translocon at the inner envelope membrane of chloroplasts 20
AT1G04945.1	47	74	55	21	94	118	2.96155	-0.0437102	1	HIT-type Zinc finger family protein
AT1G04945.2	50	82	59	26	106	132	3.13188	0.0236906	0.900767	HIT-type Zinc finger family protein
AT1G04945.3	361	450	458	190	861	940	5.88106	0.275385	0.0170021	HIT-type Zinc finger family protein
AT1G04950.1	194	213	223	44	282	369	4.48458	-0.324199	0.00310797	TATA BOX ASSOCIATED FACTOR II 59
AT1G04950.2	195	217	224	42	283	374	4.49213	-0.331754	0.00201977	TATA BOX ASSOCIATED FACTOR II 59
AT1G04950.3	194	213	223	45	285	372	4.50193	-0.309453	0.00546486	TATA BOX ASSOCIATED FACTOR II 59
AT1G04960.1	203	243	235	49	326	432	4.46938	-0.230183	0.0902612	Protein of unknown function (DUF1664)
AT1G04960.2	192	228	226	47	309	407	4.40585	-0.232787	0.0937238	Protein of unknown function (DUF1664)
AT1G04970.1	314	329	393	72	514	682	5.00142	-0.191733	0.0967068	lipid-binding serum glycoprotein family protein
AT1G04970.2	245	254	305	52	408	524	4.67103	-0.190385	0.0921269	lipid-binding serum glycoprotein family protein
AT1G04980.1	131	147	130	44	334	425	4.22743	0.487271	0.00239242	PDI-like 2-2
AT1G04985.1	178	230	255	54	418	528	4.82085	0.115781	0.6314	unknown protein
AT1G04990.1	119	137	143	72	311	363	4.05781	0.50097	0.00119279	Zinc finger C-x8-C-x5-C-x3-H type family protein
AT1G04990.2	114	131	135	69	301	348	3.99364	0.511907	0.000853387	Zinc finger C-x8-C-x5-C-x3-H type family protein
AT1G05000.1	106	112	95	27	189	238	3.23003	0.0368714	1	Phosphotyrosine protein phosphatases superfamily protein
AT1G05000.2	96	99	89	21	177	221	3.12221	0.035615	1	Phosphotyrosine protein phosphatases superfamily protein
AT1G05010.1	1594	1465	1769	287	2315	2902	7.39322	-0.354541	0.00643118	ethylene-forming enzyme
AT1G05020.1	5	6	4	4	24	12	0.325999	0.970203	0.115235	ENTH/ANTH/VHS superfamily protein
AT1G05030.1	111	112	122	19	161	214	3.69409	-0.283529	0.0488833	Major facilitator superfamily protein
AT1G05040.1	0	0	0	0	0	0	-2.63052	5.12548e-15	1	unknown protein
AT1G05040.2	0	0	0	0	0	0	-2.60854	5.12548e-15	1	unknown protein
AT1G05055.1	112	134	134	43	221	296	3.98271	0.0984533	0.564189	general transcription factor II H2
AT1G05060.1	129	163	127	36	244	282	4.02516	-0.0506966	0.954143	unknown protein
AT1G05061.1	3	4	1	0	4	3	-0.825876	-0.630606	0.668359	pseudogene
AT1G05065.1	9	3	5	1	6	12	-0.443082	-0.305282	0.850519	CLAVATA3/ESR-RELATED 20
AT1G05070.1	142	152	196	39	286	283	4.31166	-0.145497	0.481595	Protein of unknown function (DUF1068)
AT1G05080.1	0	0	0	0	0	0	-2.69873	5.12548e-15	1	F-box/RNI-like/FBD-like domains-containing protein
AT1G05090.1	239	273	300	57	426	538	4.81542	-0.143996	0.18775	dentin sialophosphoprotein-related
AT1G05100.1	5	22	13	6	12	23	0.467361	-0.336202	0.953848	mitogen-activated protein kinase kinase kinase 18
AT1G05120.1	246	301	345	61	436	518	4.84361	-0.284152	0.0243269	Helicase protein with RING/U-box domain
AT1G05135.1	17	33	33	8	50	83	2.30633	0.270766	0.742968	pseudogene
AT1G05136.1	0	0	0	0	0	0	-2.69871	5.12548e-15	1	unknown protein
AT1G05140.1	565	714	769	139	922	1150	6.12046	-0.361965	0.000202056	Peptidase M50 family protein
AT1G05150.1	420	396	481	81	710	949	5.49704	-0.0984677	0.391771	Calcium-binding tetratricopeptide family protein
AT1G05160.1	80	93	119	27	136	162	3.47541	-0.297597	0.194638	cytochrome P450, family 88, subfamily A, polypeptide 3
AT1G05170.1	186	240	253	47	346	412	4.65018	-0.225225	0.0863751	Galactosyltransferase family protein
AT1G05170.2	194	241	261	49	357	426	4.66908	-0.212553	0.10043	Galactosyltransferase family protein
AT1G05180.1	277	304	311	90	557	653	5.13497	0.0833735	0.644832	NAD(P)-binding Rossmann-fold superfamily protein
AT1G05180.2	231	274	275	82	486	589	4.95953	0.10996	0.441207	NAD(P)-binding Rossmann-fold superfamily protein
AT1G05180.3	220	259	257	80	459	568	4.88022	0.130293	0.326087	NAD(P)-binding Rossmann-fold superfamily protein
AT1G05190.1	2371	2630	3142	683	4677	5337	8.31233	-0.0813175	0.58098	Ribosomal protein L6 family
AT1G05200.1	353	378	480	117	599	737	5.61192	-0.176851	0.224465	glutamate receptor 3.4
AT1G05200.2	358	379	487	117	605	750	5.63103	-0.175143	0.222204	glutamate receptor 3.4
AT1G05205.1	117	154	157	53	383	467	4.41628	0.60585	8.33594e-07	unknown protein
AT1G05210.1	37	45	38	27	122	133	2.62164	0.801053	0.000218585	Transmembrane protein 97, predicted
AT1G05220.1	4	6	4	2	24	19	-0.202162	1.20096	0.0577164	Transmembrane protein 97, predicted
AT1G05220.2	8	17	13	3	25	38	0.902211	0.326828	0.729375	Transmembrane protein 97, predicted
AT1G05230.1	187	169	210	40	289	331	4.39906	-0.249319	0.115742	homeodomain GLABROUS 2
AT1G05230.2	191	178	211	42	298	346	4.43291	-0.228033	0.135574	homeodomain GLABROUS 2
AT1G05230.3	183	165	204	40	279	323	4.35371	-0.251336	0.127087	homeodomain GLABROUS 2
AT1G05230.4	188	176	211	43	297	343	4.43268	-0.219234	0.165562	homeodomain GLABROUS 2
AT1G05240.1	102	103	65	81	369	486	3.91185	1.39518	1.20868e-05	Peroxidase superfamily protein
AT1G05250.1	103	103	66	81	369	486	3.91316	1.38458	1.35871e-05	Peroxidase superfamily protein
AT1G05260.1	322	313	255	192	994	1319	5.46876	1.0552	2.0373e-07	Peroxidase superfamily protein
AT1G05270.1	297	288	311	66	540	614	4.94744	-0.0395665	0.765417	TraB family protein
AT1G05280.1	21	19	18	14	50	74	1.22073	0.810018	0.0138692	Protein of unknown function (DUF604)
AT1G05300.1	39	44	51	23	113	150	2.58395	0.642457	0.00415147	zinc transporter 5 precursor
AT1G05300.2	37	43	43	19	95	143	2.41947	0.59931	0.022245	zinc transporter 5 precursor
AT1G05310.1	86	76	99	29	109	164	3.11051	-0.221587	0.615282	Pectin lyase-like superfamily protein
AT1G05320.1	308	309	320	75	579	732	5.1612	0.0611285	0.965265	unknown protein
AT1G05320.2	305	306	317	72	574	729	5.14725	0.0579747	0.99496	unknown protein
AT1G05320.3	306	307	319	74	575	739	5.15855	0.0674755	0.940575	unknown protein
AT1G05330.1	0	0	1	0	2	1	-2.03836	0.922312	1	unknown protein
AT1G05340.1	84	97	75	24	175	225	2.98535	0.207906	0.772061	unknown protein
AT1G05350.1	245	215	245	85	469	575	4.85726	0.227247	0.107496	NAD(P)-binding Rossmann-fold superfamily protein
AT1G05360.1	169	231	230	56	330	397	4.42019	-0.142901	0.439949	unknown protein
AT1G05370.1	12	12	16	10	32	27	0.951186	0.355929	0.32207	Sec14p-like phosphatidylinositol transfer family protein
AT1G05380.1	381	416	465	105	670	894	5.48513	-0.0737373	0.65695	Acyl-CoA N-acyltransferase with RING/FYVE/PHD-type zinc finger protein
AT1G05380.2	385	421	469	106	674	901	5.49598	-0.0780258	0.631945	Acyl-CoA N-acyltransferase with RING/FYVE/PHD-type zinc finger protein
AT1G05385.1	168	151	203	43	247	292	4.31215	-0.293652	0.139387	photosystem II 11 kDa protein-related
AT1G05400.1	6	8	3	2	15	18	-0.265712	0.564493	0.565915	unknown protein
AT1G05400.2	5	7	3	2	11	16	-0.368106	0.475719	0.700543	unknown protein
AT1G05410.1	130	140	159	24	247	277	4.08867	-0.124583	0.338244	Protein of unknown function (DUF1423)
AT1G05410.2	119	134	146	22	235	261	3.99793	-0.102285	0.434577	Protein of unknown function (DUF1423)
AT1G05420.1	7	9	5	1	12	9	0.32435	-0.389863	0.784189	ovate family protein 12
AT1G05430.1	228	274	280	70	375	457	4.72976	-0.247965	0.0602848	unknown protein
AT1G05440.1	22	24	36	7	45	50	1.60683	-0.14324	0.853888	C-8 sterol isomerases
AT1G05450.1	2	1	4	0	2	7	-1.42407	-0.108549	0.989301	Bifunctional inhibitor/lipid-transfer protein/seed storage 2S albumin superfamily protein
AT1G05450.2	6	6	6	4	4	17	-0.432676	0.0400226	0.986948	Bifunctional inhibitor/lipid-transfer protein/seed storage 2S albumin superfamily protein
AT1G05460.1	151	169	159	36	251	297	4.08697	-0.182988	0.254803	P-loop containing nucleoside triphosphate hydrolases superfamily protein
AT1G05470.1	130	135	155	38	221	290	4.07907	-0.0767315	0.771714	DNAse I-like superfamily protein
AT1G05490.1	18	8	21	5	20	19	0.762764	-0.5277	0.532751	chromatin remodeling 31
AT1G05500.1	417	473	490	139	858	1044	5.71774	0.102129	0.398093	Calcium-dependent lipid-binding (CaLB domain) family protein
AT1G05510.1	0	0	0	0	0	0	-2.22677	5.12548e-15	1	Protein of unknown function (DUF1264)
AT1G05520.1	374	416	480	122	706	977	5.49134	0.0404616	0.895387	Sec23/Sec24 protein transport family protein
AT1G05530.1	16	16	15	8	43	62	0.971264	0.794377	0.046808	UDP-glucosyl transferase 75B2
AT1G05540.1	67	63	84	30	90	143	2.86914	-0.114573	1	Protein of unknown function (DUF295)
AT1G05550.1	5	6	2	0	8	9	-1.01655	-0.0919294	0.924882	Protein of unknown function (DUF295)
AT1G05550.2	4	6	2	0	8	9	-1.046	0.0211324	1	Protein of unknown function (DUF295)
AT1G05550.3	3	7	2	0	6	9	-1.02391	-0.157851	0.914833	Protein of unknown function (DUF295)
AT1G05560.1	477	852	1030	145	768	1117	5.86273	-0.650133	0.00137141	UDP-glucosyltransferase 75B1
AT1G05570.1	490	547	541	150	959	1234	5.71603	0.0873162	0.759785	callose synthase 1
AT1G05570.2	478	538	533	146	935	1207	5.68293	0.079409	0.790687	callose synthase 1
AT1G05575.1	9	12	11	4	22	27	-0.0309186	0.265202	0.771714	unknown protein
AT1G05577.1	4	1	6	0	8	8	-0.67595	0.0690307	1	Domain of unknown function (DUF966)
AT1G05590.1	174	145	160	39	274	362	4.24615	0.0188907	1	beta-hexosaminidase 2
AT1G05600.1	41	79	76	11	99	110	2.98877	-0.302888	0.216157	Tetratricopeptide repeat (TPR)-like superfamily protein
AT1G05600.2	44	81	80	11	100	113	3.03283	-0.341851	0.139814	Tetratricopeptide repeat (TPR)-like superfamily protein
AT1G05610.1	9	3	13	0	11	19	-0.0208011	-0.23927	0.600125	ADP-glucose pyrophosphorylase small subunit 2
AT1G05620.1	165	165	170	67	431	515	4.38128	0.54958	0.000301636	uridine-ribohydrolase 2
AT1G05620.2	151	140	153	62	394	449	4.22708	0.565679	0.000175092	uridine-ribohydrolase 2
AT1G05630.1	173	214	265	45	342	377	4.47766	-0.236734	0.091659	Endonuclease/exonuclease/phosphatase family protein
AT1G05630.2	174	216	263	45	342	384	4.47262	-0.226984	0.0980318	Endonuclease/exonuclease/phosphatase family protein
AT1G05640.1	27	19	35	15	44	61	1.69998	0.169115	0.612845	Ankyrin repeat family protein
AT1G05650.1	30	14	16	20	111	122	2.12259	1.63208	2.63003e-05	Pectin lyase-like superfamily protein
AT1G05660.1	59	48	42	27	199	243	2.77377	1.13707	0.000535452	Pectin lyase-like superfamily protein
AT1G05670.1	81	120	121	18	122	168	3.46588	-0.533453	0.00194365	Pentatricopeptide repeat (PPR-like) superfamily protein
AT1G05670.2	80	121	118	16	119	164	3.43396	-0.566007	0.000838137	Pentatricopeptide repeat (PPR-like) superfamily protein
AT1G05675.1	1	11	3	0	4	4	-1.37595	-1.37663	0.21671	UDP-Glycosyltransferase superfamily protein
AT1G05680.1	118	373	441	45	223	387	3.81273	-0.949309	0.0164189	Uridine diphosphate glycosyltransferase 74E2
AT1G05690.1	77	62	72	12	71	97	2.70515	-0.697033	0.00172807	BTB and TAZ domain protein 3
AT1G05700.1	30	43	35	8	51	44	1.61658	-0.49103	0.483221	Leucine-rich repeat transmembrane protein kinase protein
AT1G05710.1	72	75	74	26	135	153	2.86904	0.0505636	0.831685	basic helix-loop-helix (bHLH) DNA-binding superfamily protein
AT1G05710.2	85	90	91	27	154	187	3.1193	0.00661484	1	basic helix-loop-helix (bHLH) DNA-binding superfamily protein
AT1G05710.3	89	93	94	29	167	199	3.18661	0.0557711	0.877334	basic helix-loop-helix (bHLH) DNA-binding superfamily protein
AT1G05710.4	71	73	72	25	132	150	2.83208	0.0502897	0.852919	basic helix-loop-helix (bHLH) DNA-binding superfamily protein
AT1G05710.5	82	87	81	28	159	188	3.08317	0.123965	0.591558	basic helix-loop-helix (bHLH) DNA-binding superfamily protein
AT1G05720.1	160	180	181	56	350	384	4.28623	0.144578	0.416086	selenoprotein family protein
AT1G05730.1	48	41	40	12	98	121	2.40813	0.359163	0.288368	Eukaryotic protein of unknown function (DUF842)
AT1G05740.1	0	0	0	0	0	0	-2.60851	5.12548e-15	1	Eukaryotic protein of unknown function (DUF842)
AT1G05750.1	62	59	80	26	111	161	3.1425	0.11281	0.600449	Tetratricopeptide repeat (TPR)-like superfamily protein
AT1G05760.1	28	26	37	8	56	72	1.89727	0.114488	0.914081	Mannose-binding lectin superfamily protein
AT1G05770.1	6	20	13	4	24	24	0.522448	-0.0306772	1	Mannose-binding lectin superfamily protein
AT1G05780.1	39	41	46	8	61	69	2.22195	-0.333245	0.269888	Vacuolar ATPase assembly integral membrane protein VMA21-like domain
AT1G05785.1	53	65	63	14	103	127	2.71624	-0.0343662	0.950025	Got1/Sft2-like vescicle transport protein family
AT1G05785.2	48	63	56	14	93	119	2.62498	-0.0282105	1	Got1/Sft2-like vescicle transport protein family
AT1G05790.1	185	167	226	46	239	360	4.24649	-0.306227	0.0362536	lipase class 3 family protein
AT1G05790.2	207	186	249	50	289	408	4.42229	-0.248935	0.079992	lipase class 3 family protein
AT1G05805.1	186	159	172	42	261	379	4.33406	-0.08869	0.736115	basic helix-loop-helix (bHLH) DNA-binding superfamily protein
AT1G05810.1	40	32	50	8	107	138	2.41914	0.511045	0.226455	RAB GTPase homolog A5E
AT1G05820.1	18	34	33	5	43	46	1.68544	-0.316759	0.38744	SIGNAL PEPTIDE PEPTIDASE-LIKE 5
AT1G05820.2	21	33	40	6	46	42	1.80954	-0.455457	0.2013	SIGNAL PEPTIDE PEPTIDASE-LIKE 5
AT1G05830.1	401	428	496	92	648	726	5.50592	-0.32104	0.00198623	trithorax-like protein 2
AT1G05830.2	390	417	471	91	624	696	5.4592	-0.321326	0.00231234	trithorax-like protein 2
AT1G05835.1	92	105	123	28	165	169	3.87833	-0.263623	0.334511	PHD finger protein
AT1G05840.1	200	195	209	40	280	363	4.27853	-0.298119	0.0199788	Eukaryotic aspartyl protease family protein
AT1G05850.1	3665	3904	4304	1342	7405	9161	8.93164	0.161543	0.0149009	Chitinase family protein
AT1G05860.1	79	76	89	26	164	171	3.21329	0.10596	0.655593	unknown protein
AT1G05870.1	280	318	388	81	534	577	5.19109	-0.179623	0.240368	Protein of unknown function (DUF1685)
AT1G05870.2	351	388	463	84	610	669	5.45574	-0.287179	0.0209454	Protein of unknown function (DUF1685)
AT1G05870.3	325	341	412	84	553	622	5.30004	-0.235534	0.0848576	Protein of unknown function (DUF1685)
AT1G05870.4	320	350	421	88	559	622	5.32308	-0.234809	0.0909842	Protein of unknown function (DUF1685)
AT1G05880.1	4	9	12	3	22	14	0.31709	0.215809	0.898737	RING/U-box superfamily protein
AT1G05880.2	4	9	12	3	22	14	0.376444	0.215536	0.898235	RING/U-box superfamily protein
AT1G05890.1	592	632	706	134	880	1177	5.97494	-0.299089	0.00169114	RING/U-box superfamily protein
AT1G05890.2	577	602	679	131	851	1136	5.9223	-0.291649	0.00280099	RING/U-box superfamily protein
AT1G05894.1	9	5	2	0	8	4	-0.591636	-0.873551	0.304234	unknown protein
AT1G05900.1	202	205	232	40	258	307	4.26101	-0.541698	7.84338e-07	endonuclease III 2
AT1G05900.2	214	211	244	40	274	326	4.33355	-0.528671	7.69228e-07	endonuclease III 2
AT1G05910.1	340	404	394	103	569	730	5.39434	-0.155966	0.250246	cell division cycle protein 48-related / CDC48-related
AT1G05920.1	0	0	0	0	0	0	-2.65294	5.12548e-15	1	Domain of unknown function (DUF313)
AT1G05930.1	0	0	0	0	0	0	-2.6987	5.12548e-15	1	Domain of unknown function (DUF313)
AT1G05940.1	296	420	425	109	633	804	5.40565	-0.0180086	1	cationic amino acid transporter 9
AT1G05950.1	56	48	63	15	83	97	2.89232	-0.2352	0.466958	unknown protein
AT1G05960.1	475	519	556	145	883	1142	5.81476	0.0166984	1	ARM repeat superfamily protein
AT1G05960.2	461	506	551	143	866	1111	5.78886	0.0159494	1	ARM repeat superfamily protein
AT1G05970.1	36	42	55	14	81	83	2.39025	-0.0375003	1	RNA-binding (RRM/RBD/RNP motifs) family protein
AT1G05970.2	39	45	55	14	80	84	2.44547	-0.100829	0.953275	RNA-binding (RRM/RBD/RNP motifs) family protein
AT1G05990.1	0	3	0	0	3	4	-1.87126	0.676229	1	EF hand calcium-binding protein family
AT1G06000.1	712	743	824	283	1554	1985	6.6439	0.304925	0.00975794	UDP-Glycosyltransferase superfamily protein
AT1G06010.1	68	67	92	21	139	136	3.36855	-0.0693302	0.966543	unknown protein
AT1G06020.1	5	4	2	1	10	6	-0.864789	0.162675	1	pfkB-like carbohydrate kinase family protein
AT1G06030.1	3	0	2	1	4	2	-1.63001	0.0515485	1	pfkB-like carbohydrate kinase family protein
AT1G06040.1	2331	2446	2685	726	3803	4529	7.99817	-0.134919	0.143944	B-box zinc finger family protein
AT1G06040.2	2196	2291	2531	669	3550	4244	7.90445	-0.150487	0.083902	B-box zinc finger family protein
AT1G06050.1	40	47	57	9	95	117	2.39033	0.139949	0.915701	Protein of unknown function (DUF1336)
AT1G06060.1	133	141	169	43	241	275	3.95632	-0.121895	0.630326	LisH and RanBPM domains containing protein
AT1G06070.1	153	190	184	41	307	303	4.17594	-0.156024	0.361685	Basic-leucine zipper (bZIP) transcription factor family protein
AT1G06080.1	199	142	184	36	242	286	4.07657	-0.379492	0.211594	delta 9 desaturase 1
AT1G06090.1	133	150	120	58	333	451	3.94827	0.589775	0.0636872	Fatty acid desaturase family protein
AT1G06100.1	25	24	38	5	43	61	1.67181	-0.155733	0.740416	Fatty acid desaturase family protein
AT1G06110.1	280	275	305	94	466	592	4.97249	-0.0240913	1	SKP1/ASK-interacting protein 16
AT1G06120.1	39	43	40	25	148	189	2.56948	1.10247	0.000913166	Fatty acid desaturase family protein
AT1G06130.1	232	279	297	70	420	514	4.8873	-0.14768	0.238486	glyoxalase 2-4
AT1G06130.2	225	269	293	66	405	488	4.83697	-0.175875	0.136356	glyoxalase 2-4
AT1G06135.1	0	0	0	0	0	0	-2.72214	5.12548e-15	1	unknown protein
AT1G06140.1	12	9	3	3	17	15	0.411357	0.0842369	1	Pentatricopeptide repeat (PPR) superfamily protein
AT1G06148.1	0	0	1	0	1	0	-1.93859	-0.334535	1	unknown protein
AT1G06148.2	0	0	1	0	1	0	-1.9805	-0.335133	1	unknown protein
AT1G06149.1	396	403	480	87	592	671	5.45138	-0.385646	3.3768e-05	conserved peptide upstream open reading frame 8
AT1G06150.1	404	401	485	86	592	675	5.45445	-0.395986	1.05599e-05	basic helix-loop-helix (bHLH) DNA-binding superfamily protein
AT1G06150.2	396	403	480	87	592	671	5.45138	-0.385646	3.3768e-05	basic helix-loop-helix (bHLH) DNA-binding superfamily protein
AT1G06160.1	13	5	8	4	42	34	0.374122	1.10207	0.181232	octadecanoid-responsive Arabidopsis AP2/ERF 59
AT1G06170.1	6	5	7	0	8	16	-0.107683	-0.0898703	0.876186	basic helix-loop-helix (bHLH) DNA-binding superfamily protein
AT1G06170.2	6	5	7	0	8	15	-0.131038	-0.148139	0.776938	basic helix-loop-helix (bHLH) DNA-binding superfamily protein
AT1G06180.1	55	87	84	18	120	150	3.32719	-0.116239	0.760467	myb domain protein 13
AT1G06190.1	653	708	821	193	1187	1479	6.48004	-0.0729397	0.660701	Rho termination factor
AT1G06190.2	506	573	674	152	970	1218	6.16157	-0.0517843	0.793798	Rho termination factor
AT1G06200.1	380	408	471	97	707	872	5.63667	-0.0647381	0.560659	Peptidase S24/S26A/S26B/S26C family protein
AT1G06210.1	315	339	354	60	540	642	5.13737	-0.199579	0.0798873	ENTH/VHS/GAT family protein
AT1G06210.2	289	322	334	52	522	608	5.05956	-0.190815	0.119877	ENTH/VHS/GAT family protein
AT1G06220.1	792	804	912	213	1479	1824	6.67262	0.00516041	1	Ribosomal protein S5/Elongation factor G/III/V family protein
AT1G06220.2	787	806	900	213	1479	1809	6.67048	0.00873974	1	Ribosomal protein S5/Elongation factor G/III/V family protein
AT1G06225.1	0	0	0	0	0	0	-2.67565	5.12548e-15	1	CLAVATA3/ESR-RELATED 3
AT1G06230.1	628	599	620	143	919	1207	6.04408	-0.182581	0.0472692	global transcription factor group E4
AT1G06230.2	626	599	619	144	919	1207	6.0433	-0.178715	0.0537395	global transcription factor group E4
AT1G06230.3	595	561	593	132	861	1136	5.95439	-0.196971	0.0298676	global transcription factor group E4
AT1G06240.1	156	137	209	42	269	299	4.16921	-0.173827	0.401246	Protein of unknown function DUF455
AT1G06250.1	20	18	15	3	12	27	1.05834	-0.80896	0.117317	alpha/beta-Hydrolases superfamily protein
AT1G06260.1	14	6	8	2	14	16	0.48144	-0.271483	0.851035	Cysteine proteinases superfamily protein
AT1G06270.1	35	57	51	9	85	99	2.58698	-0.0364604	0.928968	Pentatricopeptide repeat (PPR) superfamily protein
AT1G06280.1	0	0	0	0	0	0	-1.75908	5.12548e-15	1	LOB domain-containing protein 2
AT1G06290.1	664	783	791	210	1399	1768	6.27371	0.112171	0.409283	acyl-CoA oxidase 3
AT1G06310.1	9	20	14	3	29	42	0.675785	0.286355	0.808838	acyl-CoA oxidase 6
AT1G06320.1	1	3	1	0	4	6	-1.58653	0.484578	1	unknown protein
AT1G06330.1	2	3	0	2	8	6	-1.44246	1.20197	0.320398	Heavy metal transport/detoxification superfamily protein
AT1G06340.1	0	0	0	0	0	1	-2.03855	1.71897	1	Plant Tudor-like protein
AT1G06350.1	48	44	49	10	64	69	2.89184	-0.438448	0.167888	Fatty acid desaturase family protein
AT1G06360.1	362	405	457	111	832	966	5.88008	0.151313	0.452563	Fatty acid desaturase family protein
AT1G06370.1	20	30	40	13	45	55	1.83169	-0.0976558	1	pseudogene
AT1G06380.1	70	73	71	14	120	166	3.37546	0.00986305	1	Ribosomal protein L1p/L10e family
AT1G06390.1	437	454	513	135	805	1091	5.62542	0.0626318	0.739077	GSK3/SHAGGY-like protein kinase 1
AT1G06390.2	409	409	463	127	743	1016	5.49223	0.0883917	0.585581	GSK3/SHAGGY-like protein kinase 1
AT1G06400.1	349	325	418	96	552	635	5.11718	-0.213459	0.144675	Ras-related small GTP-binding family protein
AT1G06410.1	1179	1323	1357	219	1876	2495	6.94997	-0.306466	0.00604944	trehalose-phosphatase/synthase 7
AT1G06420.1	24	28	35	2	35	42	1.64805	-0.620777	0.0554644	unknown protein
AT1G06420.2	18	21	30	2	30	37	1.43585	-0.481509	0.223761	unknown protein
AT1G06430.1	1980	2185	2566	458	2642	3468	7.48807	-0.490325	9.42623e-09	FTSH protease 8
AT1G06440.1	15	12	17	5	28	31	0.87459	0.0827057	0.983842	Ubiquitin carboxyl-terminal hydrolase family protein
AT1G06450.1	42	43	42	12	71	94	2.41962	0.0140347	1	Polynucleotidyl transferase, ribonuclease H-like superfamily protein
AT1G06460.1	403	463	545	127	587	824	5.94229	-0.313997	0.00767872	alpha-crystallin domain 32.1
AT1G06470.1	190	185	210	41	345	419	4.59663	-0.0224633	0.843881	Nucleotide/sugar transporter family protein
AT1G06470.2	202	204	229	49	384	474	4.72644	0.0341735	1	Nucleotide/sugar transporter family protein
AT1G06475.1	13	15	20	2	38	50	1.04686	0.412725	0.610601	unknown protein
AT1G06490.1	107	147	117	33	207	263	3.67855	-0.0326314	1	glucan synthase-like 7
AT1G06500.1	63	66	70	22	108	129	3.05431	-0.0665185	1	unknown protein
AT1G06500.2	56	54	68	22	97	121	2.94436	-0.0145492	1	unknown protein
AT1G06500.3	63	66	71	22	117	140	3.10588	0.0263123	1	unknown protein
AT1G06500.4	51	53	58	19	88	108	2.78203	-0.0463721	1	unknown protein
AT1G06510.1	158	137	197	49	275	323	4.27176	-0.0550006	0.97958	unknown protein
AT1G06515.1	90	84	96	39	170	193	3.51872	0.129664	0.410682	Protein of unknown function (DUF3317)
AT1G06515.2	103	104	117	48	208	243	3.7648	0.185431	0.210502	Protein of unknown function (DUF3317)
AT1G06520.1	10	11	11	1	27	19	0.438725	0.0660771	1	glycerol-3-phosphate acyltransferase 1
AT1G06530.1	406	436	517	83	760	1007	5.81926	-0.0745919	0.452289	Tropomyosin-related
AT1G06540.1	4	3	2	1	5	15	-0.620228	0.711348	0.611338	unknown protein
AT1G06550.1	682	724	735	207	1376	1607	6.4259	0.103724	0.429136	ATP-dependent caseinolytic (Clp) protease/crotonase family protein
AT1G06560.1	99	106	123	42	234	274	3.99701	0.286979	0.035683	NOL1/NOP2/sun family protein
AT1G06570.1	617	819	931	139	944	1256	5.93846	-0.501146	4.80688e-07	phytoene desaturation 1
AT1G06570.2	574	747	843	133	882	1178	5.82255	-0.461099	3.90105e-06	phytoene desaturation 1
AT1G06580.1	16	22	18	9	41	53	1.534	0.419466	0.241229	Pentatricopeptide repeat (PPR) superfamily protein
AT1G06590.1	102	151	120	34	219	258	3.84809	-0.00992933	1	unknown protein
AT1G06620.1	86	98	78	38	208	260	3.42857	0.494895	0.0222087	2-oxoglutarate (2OG) and Fe(II)-dependent oxygenase superfamily protein
AT1G06630.1	107	131	103	31	181	218	3.6367	-0.126844	0.657324	F-box/RNI-like superfamily protein
AT1G06630.2	91	121	96	30	165	204	3.51272	-0.0849554	0.879554	F-box/RNI-like superfamily protein
AT1G06630.3	93	118	92	31	164	203	3.49845	-0.0619303	0.998627	F-box/RNI-like superfamily protein
AT1G06640.1	913	947	926	256	1635	1866	6.60627	-0.0324903	0.957422	2-oxoglutarate (2OG) and Fe(II)-dependent oxygenase superfamily protein
AT1G06640.2	864	877	863	243	1518	1715	6.5022	-0.040327	0.925419	2-oxoglutarate (2OG) and Fe(II)-dependent oxygenase superfamily protein
AT1G06640.3	833	849	844	241	1478	1674	6.46121	-0.0268586	1	2-oxoglutarate (2OG) and Fe(II)-dependent oxygenase superfamily protein
AT1G06645.1	78	97	137	29	169	129	3.18897	-0.341037	0.248401	2-oxoglutarate (2OG) and Fe(II)-dependent oxygenase superfamily protein
AT1G06650.1	401	470	560	127	588	808	5.41917	-0.346572	0.00217235	2-oxoglutarate (2OG) and Fe(II)-dependent oxygenase superfamily protein
AT1G06650.2	464	528	615	149	675	911	5.59231	-0.318823	0.00523349	2-oxoglutarate (2OG) and Fe(II)-dependent oxygenase superfamily protein
AT1G06660.1	36	36	26	8	59	84	2.05667	0.142947	0.9048	unknown protein
AT1G06670.1	589	651	712	162	1182	1386	6.32245	0.000487244	1	nuclear DEIH-boxhelicase
AT1G06680.1	28213	30007	34353	8638	46715	56663	11.6946	-0.132754	0.135538	photosystem II subunit P-1
AT1G06680.2	25843	27329	31396	7890	42429	51369	11.5652	-0.139231	0.12075	photosystem II subunit P-1
AT1G06690.1	548	585	701	178	917	987	6.18551	-0.222266	0.129111	NAD(P)-linked oxidoreductase superfamily protein
AT1G06700.1	511	571	543	140	916	1125	5.92338	-0.0475998	0.734009	Protein kinase superfamily protein
AT1G06700.2	512	559	533	136	916	1118	5.9106	-0.0397948	0.780089	Protein kinase superfamily protein
AT1G06710.1	57	75	61	12	104	110	2.99961	-0.242904	0.326535	Tetratricopeptide repeat (TPR)-like superfamily protein
AT1G06720.1	346	443	429	91	752	993	5.80747	0.0735113	0.90812	P-loop containing nucleoside triphosphate hydrolases superfamily protein
AT1G06730.1	115	132	141	44	207	241	3.99428	-0.105978	0.876833	pfkB-like carbohydrate kinase family protein
AT1G06750.1	7	8	15	1	18	16	0.569257	-0.239553	0.777373	P-loop containing nucleoside triphosphate hydrolases superfamily protein
AT1G06750.2	3	1	1	0	3	1	-1.51337	-0.726266	0.731732	P-loop containing nucleoside triphosphate hydrolases superfamily protein
AT1G06760.1	1725	1800	1807	382	3087	3636	7.58583	-0.114034	0.294217	winged-helix DNA-binding transcription factor family protein
AT1G06770.1	63	92	92	17	128	151	3.10209	-0.206351	0.380849	DREB2A-interacting protein 1
AT1G06770.2	65	84	95	16	129	145	3.07721	-0.217587	0.326194	DREB2A-interacting protein 1
AT1G06780.1	195	198	174	58	405	440	4.26306	0.197518	0.381274	galacturonosyltransferase 6
AT1G06780.2	196	202	174	55	402	435	4.26086	0.160794	0.540295	galacturonosyltransferase 6
AT1G06790.1	82	94	59	27	154	166	3.44865	0.104957	0.710957	RNA polymerase Rpb7 N-terminal domain-containing protein
AT1G06790.2	94	107	72	34	177	206	3.6301	0.156402	0.446991	RNA polymerase Rpb7 N-terminal domain-containing protein
AT1G06800.1	87	105	103	38	176	248	3.5322	0.194149	0.302548	alpha/beta-Hydrolases superfamily protein
AT1G06800.2	73	87	85	28	138	195	3.20605	0.0993036	0.712764	alpha/beta-Hydrolases superfamily protein
AT1G06810.1	0	0	0	0	0	0	-2.44359	5.12548e-15	1	unknown protein
AT1G06820.1	369	420	461	101	704	747	5.55421	-0.148302	0.206006	carotenoid isomerase
AT1G06830.1	28	25	38	6	60	55	2.15094	-0.0612766	0.983842	Glutaredoxin family protein
AT1G06840.1	263	267	219	71	383	490	4.5897	-0.124235	0.61578	Leucine-rich repeat protein kinase family protein
AT1G06850.1	42	61	48	26	128	158	2.79245	0.597604	0.0040481	basic leucine-zipper 52
AT1G06850.2	37	48	34	19	96	121	2.40155	0.532655	0.034503	basic leucine-zipper 52
AT1G06870.1	190	211	209	54	390	496	4.55015	0.145733	0.47762	Peptidase S24/S26A/S26B/S26C family protein
AT1G06890.1	316	311	344	141	703	820	5.30179	0.361771	0.00393813	nodulin MtN21 /EamA-like transporter family protein
AT1G06890.2	282	275	307	134	636	734	5.15012	0.396151	0.00202435	nodulin MtN21 /EamA-like transporter family protein
AT1G06890.3	306	291	326	136	661	775	5.22697	0.358358	0.00661632	nodulin MtN21 /EamA-like transporter family protein
AT1G06900.1	453	489	498	126	937	1157	5.83285	0.138509	0.318085	Insulinase (Peptidase family M16) family protein
AT1G06910.1	52	63	75	10	90	95	2.80366	-0.429188	0.0599198	TRF-like 7
AT1G06920.1	0	0	0	0	0	0	-2.54441	5.12548e-15	1	ovate family protein 4
AT1G06923.1	5	6	4	6	19	23	-0.467112	1.23566	0.0253061	unknown protein
AT1G06925.1	1	0	0	0	0	1	-2.67552	-0.349139	1	unknown protein
AT1G06930.1	5	5	4	2	17	28	-0.344294	1.2539	0.0518688	unknown protein
AT1G06950.1	1464	1596	1718	440	3086	3738	7.73291	0.110969	0.370453	translocon at the inner envelope membrane of chloroplasts 110
AT1G06960.1	124	128	131	33	221	221	3.83319	-0.146225	0.543267	RNA-binding (RRM/RBD/RNP motifs) family protein
AT1G06960.2	120	126	124	29	206	198	3.71852	-0.231572	0.239967	RNA-binding (RRM/RBD/RNP motifs) family protein
AT1G06960.3	112	113	116	30	197	199	3.687	-0.135793	0.628136	RNA-binding (RRM/RBD/RNP motifs) family protein
AT1G06970.1	2	0	1	0	1	1	-1.98021	-0.912165	0.876152	cation/hydrogen exchanger 14
AT1G06980.1	28	15	17	6	28	38	2.41239	-0.19878	0.785269	unknown protein
AT1G06990.1	0	0	0	0	0	1	-2.60864	1.71541	1	GDSL-like Lipase/Acylhydrolase superfamily protein
AT1G07000.1	94	94	97	32	155	223	3.22749	0.0813628	0.928263	exocyst subunit exo70 family protein B2
AT1G07010.1	893	949	1119	195	1209	1613	6.48164	-0.447192	5.37703e-07	Calcineurin-like metallo-phosphoesterase superfamily protein
AT1G07010.2	856	912	1079	185	1165	1567	6.42165	-0.442685	7.44313e-07	Calcineurin-like metallo-phosphoesterase superfamily protein
AT1G07010.3	814	868	1040	171	1107	1498	6.35704	-0.454406	5.87891e-07	Calcineurin-like metallo-phosphoesterase superfamily protein
AT1G07020.1	72	73	91	19	152	166	3.16711	0.0456309	1	unknown protein
AT1G07025.1	0	0	0	0	0	0	-2.72216	5.12548e-15	1	Mitochondrial substrate carrier family protein
AT1G07030.1	170	240	228	55	395	470	4.68932	0.0540558	0.960039	Mitochondrial substrate carrier family protein
AT1G07040.1	137	167	186	52	224	328	3.96658	-0.128066	0.788427	unknown protein
AT1G07050.1	6	5	8	0	13	13	-0.0415232	-0.0371957	0.881336	CCT motif family protein
AT1G07060.1	0	2	1	0	2	2	-2.08296	-0.0486812	1	unknown protein
AT1G07070.1	123	145	173	55	442	494	4.56595	0.691078	1.89263e-07	Ribosomal protein L35Ae family protein
AT1G07080.1	634	627	821	220	1130	1355	6.16657	-0.0493607	0.946595	Thioredoxin superfamily protein
AT1G07090.1	63	67	58	26	139	146	2.92991	0.283735	0.251738	Protein of unknown function (DUF640)
AT1G07110.1	1399	1436	1651	322	2120	2638	7.26336	-0.298835	0.000115451	fructose-2,6-bisphosphatase
AT1G07120.1	15	16	13	0	20	30	0.67487	-0.319103	0.289926	unknown protein
AT1G07130.1	53	48	63	12	93	108	2.53466	-0.0901512	0.805859	Nucleic acid-binding, OB-fold-like protein
AT1G07135.1	6	14	16	12	94	158	1.29379	2.29585	0.000149893	glycine-rich protein
AT1G07140.1	996	1094	1211	259	2206	2794	7.0802	0.130719	0.416814	Pleckstrin homology (PH) domain superfamily protein
AT1G07150.1	25	36	35	9	49	55	1.676	-0.221065	0.715642	mitogen-activated protein kinase kinase kinase 13
AT1G07150.2	25	36	35	9	49	55	1.676	-0.221065	0.715642	mitogen-activated protein kinase kinase kinase 13
AT1G07160.1	3	3	2	1	7	6	-1.48252	0.334716	0.895427	Protein phosphatase 2C family protein
AT1G07170.1	67	80	101	26	142	202	3.34932	0.116011	0.741142	PHF5-like protein
AT1G07170.2	42	62	72	21	118	146	2.93574	0.244055	0.409398	PHF5-like protein
AT1G07170.3	54	75	89	23	127	173	3.20103	0.109799	0.773815	PHF5-like protein
AT1G07175.1	2	2	2	3	11	10	-1.09029	1.55239	0.0979315	unknown protein
AT1G07180.1	1341	1393	1570	374	2084	2729	7.0342	-0.181664	0.0729335	alternative NAD(P)H dehydrogenase 1
AT1G07190.1	0	0	0	0	0	0	-2.72215	5.12548e-15	1	unknown protein
AT1G07200.1	125	182	173	28	275	315	3.95544	-0.116321	0.381154	Double Clp-N motif-containing P-loop nucleoside triphosphate hydrolases superfamily protein
AT1G07200.2	216	264	255	53	389	475	4.54008	-0.150969	0.178447	Double Clp-N motif-containing P-loop nucleoside triphosphate hydrolases superfamily protein
AT1G07210.1	277	309	332	94	569	677	5.22797	0.0867522	0.540248	Ribosomal protein S18
AT1G07220.1	119	97	128	41	190	221	3.61799	-0.0505608	1	Arabidopsis thaliana protein of unknown function (DUF821)
AT1G07230.1	255	271	306	79	430	529	4.7895	-0.134988	0.419035	non-specific phospholipase C1
AT1G07240.1	144	165	160	48	259	342	4.23212	0.00988717	1	UDP-glucosyl transferase 71C5
AT1G07250.1	347	400	382	107	548	708	5.30911	-0.181638	0.155464	UDP-glucosyl transferase 71C4
AT1G07260.1	64	68	86	36	151	218	2.86206	0.47695	0.0582903	UDP-glucosyl transferase 71C3
AT1G07270.1	18	22	16	4	31	25	1.00426	-0.358486	0.550502	Cell division control, Cdc6
AT1G07280.1	527	559	576	213	1104	1512	6.05137	0.319362	0.00184593	Tetratricopeptide repeat (TPR)-like superfamily protein
AT1G07280.2	501	533	551	209	1052	1420	5.99323	0.319465	0.0024538	Tetratricopeptide repeat (TPR)-like superfamily protein
AT1G07280.3	509	538	556	212	1062	1437	6.0051	0.320265	0.00264448	Tetratricopeptide repeat (TPR)-like superfamily protein
AT1G07290.1	12	17	16	7	43	34	1.18512	0.4561	0.314594	golgi nucleotide sugar transporter 2
AT1G07300.1	41	42	33	10	43	72	2.2067	-0.357365	0.336486	josephin protein-related
AT1G07310.1	192	195	213	58	355	473	4.57318	0.0938155	0.656289	Calcium-dependent lipid-binding (CaLB domain) family protein
AT1G07320.1	2460	2701	3196	707	5130	6285	8.51903	0.0278472	0.992957	ribosomal protein L4
AT1G07320.2	2245	2446	2924	664	4743	5831	8.37963	0.0572674	0.798129	ribosomal protein L4
AT1G07320.3	1898	2062	2475	572	4151	5189	8.13642	0.112476	0.44704	ribosomal protein L4
AT1G07320.4	2248	2448	2930	665	4742	5825	8.37978	0.055171	0.811529	ribosomal protein L4
AT1G07330.1	0	1	1	0	1	7	-1.51416	1.38044	0.735	unknown protein
AT1G07340.1	0	0	0	0	0	0	-2.72214	5.12548e-15	1	sugar transporter 2
AT1G07350.1	276	302	362	87	517	572	5.09789	-0.123332	0.515815	RNA-binding (RRM/RBD/RNP motifs) family protein
AT1G07350.2	282	313	385	92	544	598	5.15591	-0.11054	0.595519	RNA-binding (RRM/RBD/RNP motifs) family protein
AT1G07360.1	361	411	456	130	757	952	5.60935	0.125472	0.310667	CCCH-type zinc fingerfamily protein with RNA-binding domain
AT1G07370.1	197	217	214	58	435	477	4.80801	0.159269	0.329497	proliferating cellular nuclear antigen 1
AT1G07380.1	137	161	161	24	286	317	3.92307	-0.0547921	0.65636	Neutral/alkaline non-lysosomal ceramidase
AT1G07390.1	40	47	39	8	69	84	2.28034	-0.119526	0.72129	receptor like protein 1
AT1G07390.2	39	43	34	8	65	78	2.19871	-0.0888237	0.831205	receptor like protein 1
AT1G07390.3	39	45	37	8	69	82	2.25048	-0.0783589	0.847286	receptor like protein 1
AT1G07400.1	8	46	33	1	19	22	0.956449	-1.52681	0.000392929	HSP20-like chaperones superfamily protein
AT1G07410.1	23	21	21	13	51	57	1.36099	0.46099	0.172418	RAB GTPase homolog A2B
AT1G07420.1	158	184	192	61	298	405	4.6691	0.0611459	0.699924	sterol 4-alpha-methyl-oxidase 2-1
AT1G07420.2	153	176	185	60	284	376	4.62451	0.0339255	0.821315	sterol 4-alpha-methyl-oxidase 2-1
AT1G07430.1	46	47	49	5	7	21	1.82671	-2.51071	1.33826e-07	highly ABA-induced PP2C gene 2
AT1G07440.1	387	401	497	78	619	741	5.62755	-0.322534	0.00154674	NAD(P)-binding Rossmann-fold superfamily protein
AT1G07440.2	346	362	456	72	567	670	5.47834	-0.311821	0.00333339	NAD(P)-binding Rossmann-fold superfamily protein
AT1G07450.1	50	60	66	6	69	66	2.55171	-0.784666	0.000224132	NAD(P)-binding Rossmann-fold superfamily protein
AT1G07460.1	0	0	1	0	4	3	-2.19374	2.02514	0.660789	Concanavalin A-like lectin family protein
AT1G07470.1	419	373	456	101	650	809	5.38905	-0.147228	0.179456	Transcription factor IIA, alpha/beta subunit
AT1G07473.1	1	2	2	0	1	2	-1.92532	-1.10226	0.743575	unknown protein
AT1G07476.1	0	0	0	0	0	0	-2.65294	5.12548e-15	1	unknown protein
AT1G07480.1	426	390	452	113	643	831	5.39958	-0.137794	0.294258	Transcription factor IIA, alpha/beta subunit
AT1G07480.2	419	384	445	111	628	805	5.37257	-0.153129	0.231851	Transcription factor IIA, alpha/beta subunit
AT1G07485.1	29	26	33	5	37	36	1.4506	-0.632728	0.0583935	unknown protein
AT1G07490.1	34	30	44	12	46	60	1.7495	-0.320015	0.560867	ROTUNDIFOLIA like 3
AT1G07500.1	1	1	4	0	3	9	-1.35859	0.497913	1	unknown protein
AT1G07510.1	404	477	456	98	809	931	5.62979	-0.0417956	0.778463	FTSH protease 10
AT1G07520.1	113	114	118	25	178	251	3.40832	-0.0946455	0.718097	GRAS family transcription factor
AT1G07530.1	368	380	435	82	608	705	5.18573	-0.233999	0.0126571	SCARECROW-like 14
AT1G07540.1	1	0	0	0	1	2	-2.44369	0.913131	1	TRF-like 2
AT1G07550.1	4	4	8	1	1	17	-0.687998	-0.26163	0.975981	Leucine-rich repeat protein kinase family protein
AT1G07560.1	54	55	43	11	77	107	2.15819	-0.148339	0.831094	Leucine-rich repeat protein kinase family protein
AT1G07570.1	147	174	177	33	232	257	4.00784	-0.395341	0.00454235	Protein kinase superfamily protein
AT1G07570.2	145	168	174	31	221	257	3.9804	-0.402444	0.00349191	Protein kinase superfamily protein
AT1G07570.3	130	146	157	25	201	232	3.8344	-0.390598	0.00803491	Protein kinase superfamily protein
AT1G07590.1	13620	13451	14136	2510	24372	29190	10.3581	-0.167213	0.411238	Tetratricopeptide repeat (TPR)-like superfamily protein
AT1G07600.1	2580	2564	2840	498	4368	5206	7.93173	-0.231155	0.120064	metallothionein 1A
AT1G07610.1	1759	1695	1677	245	3201	3608	7.38499	-0.207914	0.478462	metallothionein 1C
AT1G07615.1	63	60	61	22	134	139	3.18499	0.227121	0.393578	GTP-binding protein Obg/CgtA
AT1G07620.1	32	41	30	4	41	47	1.36362	-0.669635	0.138142	GTP-binding protein Obg/CgtA
AT1G07630.1	182	177	161	54	324	408	4.21717	0.127469	0.574777	pol-like 5
AT1G07640.1	328	344	419	80	453	509	5.27123	-0.510378	1.07091e-05	Dof-type zinc finger DNA-binding family protein
AT1G07640.2	321	337	406	77	451	497	5.23762	-0.499772	2.13915e-05	Dof-type zinc finger DNA-binding family protein
AT1G07640.3	322	336	410	78	453	499	5.23877	-0.497117	2.35093e-05	Dof-type zinc finger DNA-binding family protein
AT1G07645.1	0	1	1	0	0	0	-2.26037	-2.86795	0.783473	dessication-induced 1VOC superfamily protein
AT1G07650.1	300	321	322	75	493	596	5.30591	-0.164604	0.172895	Leucine-rich repeat transmembrane protein kinase
AT1G07650.2	283	308	299	74	462	564	5.24364	-0.159777	0.213976	Leucine-rich repeat transmembrane protein kinase
AT1G07660.1	339	364	432	78	679	700	5.55625	-0.124037	0.331008	Histone superfamily protein
AT1G07660.2	216	225	242	48	393	419	4.82754	-0.143351	0.326628	Histone superfamily protein
AT1G07670.1	745	818	832	222	1558	2027	6.4514	0.163558	0.267735	endomembrane-type CA-ATPase 4
AT1G07680.1	0	0	0	0	0	0	-2.72212	5.12548e-15	1	unknown protein
AT1G07690.1	0	0	0	0	0	0	-2.56542	5.12548e-15	1	unknown protein
AT1G07700.1	620	644	763	144	940	1101	6.02329	-0.355765	0.00020599	Thioredoxin superfamily protein
AT1G07700.2	536	549	654	118	796	924	5.7909	-0.386909	4.4843e-05	Thioredoxin superfamily protein
AT1G07700.3	540	561	680	121	796	955	5.8455	-0.395483	0.000115995	Thioredoxin superfamily protein
AT1G07705.1	225	221	244	48	447	524	4.75043	0.0737624	0.99294	NOT2 / NOT3 / NOT5 family
AT1G07705.2	234	233	253	50	474	539	4.79873	0.0745622	0.975438	NOT2 / NOT3 / NOT5 family
AT1G07710.1	10	11	8	3	11	14	0.0106805	-0.498368	0.705927	Ankyrin repeat family protein
AT1G07720.1	258	306	384	81	472	634	4.9454	-0.134923	0.537605	3-ketoacyl-CoA synthase 3
AT1G07725.1	100	115	105	38	177	193	3.54897	-0.0873133	1	exocyst subunit exo70 family protein H6
AT1G07730.2	22	41	44	17	113	98	2.14257	0.662658	0.0373167	Disease resistance-responsive (dirigent-like protein) family protein
AT1G07740.1	53	79	70	24	158	159	2.94907	0.305006	0.275	Tetratricopeptide repeat (TPR)-like superfamily protein
AT1G07745.1	34	41	56	16	65	87	2.34675	-0.0825105	1	homolog of RAD51 D
AT1G07745.2	32	43	58	14	65	85	2.38491	-0.146703	0.870118	homolog of RAD51 D
AT1G07750.1	277	241	272	117	605	790	4.95864	0.489693	4.73308e-05	RmlC-like cupins superfamily protein
AT1G07770.1	1759	1870	1997	540	3892	4158	7.90849	0.132986	0.152664	ribosomal protein S15A
AT1G07770.2	1636	1770	1910	529	3599	3813	7.83014	0.117889	0.202758	ribosomal protein S15A
AT1G07780.1	158	218	204	55	417	427	4.80905	0.167869	0.347656	phosphoribosylanthranilate isomerase 1
AT1G07780.2	158	218	198	56	407	416	4.78642	0.153403	0.389959	phosphoribosylanthranilate isomerase 1
AT1G07780.3	172	228	215	57	462	495	4.92494	0.247709	0.108398	phosphoribosylanthranilate isomerase 1
AT1G07780.4	168	219	201	46	438	467	4.85563	0.205984	0.319198	phosphoribosylanthranilate isomerase 1
AT1G07780.5	158	219	201	55	414	417	4.79243	0.153507	0.403153	phosphoribosylanthranilate isomerase 1
AT1G07790.1	429	479	484	95	815	966	5.97036	-0.0678551	0.490747	Histone superfamily protein
AT1G07795.1	5	3	3	2	11	7	-0.937484	0.431225	0.782289	unknown protein
AT1G07810.1	689	740	765	184	1325	1691	6.26313	0.041169	0.978294	ER-type Ca2+-ATPase 1
AT1G07820.1	619	635	753	145	1166	1244	6.40866	-0.134808	0.177018	Histone superfamily protein
AT1G07820.2	597	616	737	139	1120	1198	6.36408	-0.149513	0.133956	Histone superfamily protein
AT1G07830.1	153	158	150	53	328	326	4.41881	0.164109	0.285543	ribosomal protein L29 family protein
AT1G07840.1	180	170	196	42	312	382	4.52734	-0.0409551	0.790856	Sas10/Utp3/C1D family
AT1G07840.2	160	156	176	38	291	357	4.41349	0.00641258	1	Sas10/Utp3/C1D family
AT1G07840.3	168	148	183	39	291	364	4.41614	0.00137928	1	Sas10/Utp3/C1D family
AT1G07850.1	0	1	0	0	0	0	-2.33098	-2.06056	1	Protein of unknown function (DUF604)
AT1G07860.1	0	0	0	0	0	0	-2.56554	5.12548e-15	1	unknown protein
AT1G07870.1	98	119	122	35	195	230	3.61896	-0.0084862	1	Protein kinase superfamily protein
AT1G07870.2	87	115	106	32	174	210	3.47912	-0.0153604	1	Protein kinase superfamily protein
AT1G07880.1	39	40	36	14	71	88	2.10198	0.129286	0.746935	Protein kinase superfamily protein
AT1G07880.2	41	37	33	14	76	87	2.08826	0.213922	0.517913	Protein kinase superfamily protein
AT1G07885.1	0	0	0	0	0	0	-2.72217	5.12548e-15	1	unknown protein
AT1G07890.1	5946	6875	7106	2182	14066	17227	9.48797	0.270597	0.00146462	ascorbate peroxidase 1
AT1G07890.2	5593	6512	6709	2061	13130	15946	9.40576	0.255301	0.00264448	ascorbate peroxidase 1
AT1G07890.3	5573	6483	6683	2056	13099	15884	9.40114	0.256848	0.00249898	ascorbate peroxidase 1
AT1G07890.4	5590	6506	6703	2061	13121	15924	9.40494	0.255401	0.00262122	ascorbate peroxidase 1
AT1G07890.5	5574	6484	6688	2058	13106	15894	9.40192	0.257341	0.00245693	ascorbate peroxidase 1
AT1G07890.6	5542	6426	6614	2006	12926	16001	9.36936	0.255106	0.00336761	ascorbate peroxidase 1
AT1G07890.7	5576	6483	6684	2058	13105	15887	9.40165	0.257277	0.00244448	ascorbate peroxidase 1
AT1G07890.8	5589	6509	6705	2062	13122	15930	9.40538	0.255551	0.00259963	ascorbate peroxidase 1
AT1G07900.1	1	2	5	0	0	8	-1.57624	-0.495428	0.868949	LOB domain-containing protein 1
AT1G07901.1	4	4	4	2	10	8	-0.924699	0.273834	0.834569	unknown protein
AT1G07910.1	190	185	246	50	322	429	4.52545	-0.102663	0.552475	RNAligase
AT1G07910.2	196	189	249	50	329	449	4.57738	-0.0885098	0.600517	RNAligase
AT1G07920.1	9792	10620	11317	4417	25802	30427	10.5507	0.499854	1.69323e-18	GTP binding Elongation factor Tu family protein
AT1G07930.1	8703	9537	10170	3830	23010	27104	10.382	0.48051	1.07598e-17	GTP binding Elongation factor Tu family protein
AT1G07930.2	6672	7345	7796	2928	17218	20519	9.98454	0.458452	9.8719e-15	GTP binding Elongation factor Tu family protein
AT1G07940.1	9618	10355	11020	4247	25100	29655	10.5013	0.488938	1.17909e-17	GTP binding Elongation factor Tu family protein
AT1G07940.2	9509	10246	10893	4198	24781	29191	10.486	0.485738	2.66673e-17	GTP binding Elongation factor Tu family protein
AT1G07950.1	118	124	122	21	223	258	3.78307	-0.0195515	0.802544	Surfeit locus protein 5 subunit 22 of Mediator complex
AT1G07960.1	229	209	259	40	371	422	4.58707	-0.225044	0.0443725	PDI-like 5-1
AT1G07960.2	241	221	273	42	391	444	4.6473	-0.228258	0.036666	PDI-like 5-1
AT1G07960.3	246	213	266	43	397	446	4.64983	-0.196773	0.0909842	PDI-like 5-1
AT1G07970.1	116	139	157	47	241	300	4.03185	0.0578151	0.733955	unknown protein
AT1G07980.1	113	138	159	19	227	266	3.97436	-0.178292	0.231443	nuclear factor Y, subunit C10
AT1G07985.1	16	20	17	5	47	60	1.12021	0.56155	0.368256	Expressed protein
AT1G07990.1	508	522	537	120	755	993	5.74292	-0.220581	0.0183938	SIT4 phosphatase-associated family protein
AT1G08000.1	67	67	84	29	125	132	3.21114	-0.0434427	1	GATA transcription factor 10
AT1G08000.2	58	54	79	25	111	119	3.06644	-0.0177946	1	GATA transcription factor 10
AT1G08005.1	0	0	0	0	0	2	-2.38635	2.47681	1	unknown protein
AT1G08010.1	122	119	145	45	220	263	3.97906	-0.0017094	0.983456	GATA transcription factor 11
AT1G08010.2	87	87	102	37	158	202	3.49771	0.0741866	0.639857	GATA transcription factor 11
AT1G08030.1	216	235	276	61	334	420	4.64296	-0.291	0.0271241	tyrosylprotein sulfotransferase
AT1G08035.1	0	3	1	2	5	7	-1.39611	1.29645	0.245935	unknown protein
AT1G08040.1	195	225	239	56	353	448	4.64465	-0.0867809	0.627381	Protein of unknown function (DUF707)
AT1G08040.2	183	228	234	53	346	443	4.62143	-0.0843963	0.642714	Protein of unknown function (DUF707)
AT1G08050.1	52	48	57	20	93	151	2.60864	0.289311	0.437023	Zinc finger (C3HC4-type RING finger) family protein
AT1G08060.1	272	328	329	74	399	502	4.8642	-0.384383	0.00103533	ATP-dependent helicase family protein
AT1G08060.2	265	322	322	72	383	476	4.81796	-0.418342	0.000310638	ATP-dependent helicase family protein
AT1G08065.1	0	0	0	0	0	0	-2.36778	5.12548e-15	1	alpha carbonic anhydrase 5
AT1G08070.1	10	10	11	0	21	19	0.628405	-0.119315	0.6528	Tetratricopeptide repeat (TPR)-like superfamily protein
AT1G08080.1	3	1	0	0	2	3	-1.49376	-0.152818	1	alpha carbonic anhydrase 7
AT1G08090.1	23	44	44	29	162	221	3.07836	1.44747	0.013435	nitrate transporter 2:1
AT1G08100.1	2	3	2	2	6	18	-0.249592	1.37979	0.140395	nitrate transporter 2.2
AT1G08110.1	733	844	912	205	1271	1472	6.47423	-0.212101	0.00925868	lactoylglutathione lyase family protein / glyoxalase I family protein
AT1G08110.2	733	851	912	210	1279	1480	6.47932	-0.203461	0.0158979	lactoylglutathione lyase family protein / glyoxalase I family protein
AT1G08110.3	733	847	912	204	1287	1486	6.48438	-0.201415	0.0150487	lactoylglutathione lyase family protein / glyoxalase I family protein
AT1G08110.4	750	863	933	214	1307	1524	6.51009	-0.19692	0.016885	lactoylglutathione lyase family protein / glyoxalase I family protein
AT1G08120.1	0	0	0	1	3	1	-1.99485	3.66095	0.198951	unknown protein
AT1G08125.1	133	121	153	25	239	283	3.98547	-0.0505242	0.672814	S-adenosyl-L-methionine-dependent methyltransferases superfamily protein
AT1G08125.2	131	115	144	23	227	268	3.92017	-0.070297	0.576414	S-adenosyl-L-methionine-dependent methyltransferases superfamily protein
AT1G08125.3	88	91	96	17	154	192	3.43695	-0.0743084	0.66024	S-adenosyl-L-methionine-dependent methyltransferases superfamily protein
AT1G08130.1	383	442	423	105	661	788	5.66367	-0.147573	0.223761	DNA ligase 1
AT1G08140.1	0	0	0	0	0	0	-2.6986	5.12548e-15	1	cation/H+ exchanger 6A
AT1G08150.1	0	0	0	0	0	1	-2.67573	1.71294	1	Cation/hydrogen exchanger family protein
AT1G08160.1	112	102	117	32	241	279	3.59919	0.260861	0.24707	Late embryogenesis abundant (LEA) hydroxyproline-rich glycoprotein family
AT1G08165.1	7	2	4	4	6	9	-0.268381	0.130719	0.865036	unknown protein
AT1G08170.1	1	1	0	0	0	1	-2.08328	-1.16265	0.771714	Histone superfamily protein
AT1G08180.1	33	46	49	12	51	68	2.00978	-0.419112	0.246108	unknown protein
AT1G08190.1	1124	1265	1377	360	2112	2720	7.07756	0.00360273	1	vacuolar protein sorting 41
AT1G08200.1	2105	2237	2462	713	4071	5109	7.96932	0.0912701	0.236668	UDP-D-apiose/UDP-D-xylose synthase 2
AT1G08210.1	128	148	142	49	253	249	4.03494	-0.0441318	1	Eukaryotic aspartyl protease family protein
AT1G08220.1	54	84	64	24	156	186	3.30347	0.392064	0.0731414	unknown protein
AT1G08220.2	37	72	47	20	124	153	2.93929	0.463792	0.0845136	unknown protein
AT1G08230.2	101	109	141	31	153	235	3.75843	-0.205947	0.363743	Transmembrane amino acid transporter family protein
AT1G08250.1	177	189	189	69	286	322	4.25057	-0.126184	0.860338	arogenate dehydratase 6
AT1G08260.1	294	367	368	58	467	548	5.23606	-0.42714	0.000434969	DNA polymerase epsilon catalytic subunit
AT1G08270.1	9	5	5	1	8	16	0.0153392	-0.0767935	1	unknown protein
AT1G08270.2	19	21	20	1	30	45	1.54724	-0.16568	0.625894	unknown protein
AT1G08280.1	62	68	98	23	153	173	3.32604	0.155065	0.583892	Glycosyltransferase family 29 (sialyltransferase) family protein
AT1G08290.1	22	46	39	7	56	72	1.88455	-0.138932	0.781687	WIP domain protein 3
AT1G08300.1	24	29	42	10	59	71	2.24197	0.100984	0.889341	no vein-like
AT1G08310.1	14	11	15	6	44	58	1.1247	0.950428	0.0227787	alpha/beta-Hydrolases superfamily protein
AT1G08310.2	13	11	15	6	44	57	1.09649	0.975938	0.0162524	alpha/beta-Hydrolases superfamily protein
AT1G08315.1	40	62	56	22	87	137	2.6096	0.195034	0.498915	ARM repeat superfamily protein
AT1G08320.1	99	109	88	53	216	317	3.3558	0.583623	0.0310329	bZIP transcription factor family protein
AT1G08320.2	85	91	73	47	172	266	3.11672	0.575094	0.0451179	bZIP transcription factor family protein
AT1G08320.3	99	105	83	51	206	307	3.31745	0.569924	0.0397882	bZIP transcription factor family protein
AT1G08340.1	54	55	54	21	121	167	2.82227	0.451423	0.10997	Rho GTPase activating protein with PAK-box/P21-Rho-binding domain
AT1G08350.1	91	108	114	38	196	236	3.51516	0.14375	0.521069	Endomembrane protein 70 protein family
AT1G08350.2	95	111	117	41	203	241	3.55213	0.150367	0.481437	Endomembrane protein 70 protein family
AT1G08360.1	1949	2134	2266	753	5031	5353	8.17904	0.35302	9.25203e-08	Ribosomal protein L1p/L10e family
AT1G08370.1	211	256	268	93	451	582	4.87491	0.176931	0.16557	decapping 1
AT1G08380.1	16450	17606	20394	4193	26602	32414	11.0264	-0.254167	0.00137164	photosystem I subunit O
AT1G08390.1	49	43	58	9	108	106	2.71421	0.101505	1	unknown protein
AT1G08400.1	55	62	73	17	124	133	2.93524	0.066039	0.934709	RINT-1 / TIP-1 family
AT1G08410.1	162	182	177	53	370	412	4.49263	0.214625	0.1732	P-loop containing nucleoside triphosphate hydrolases superfamily protein
AT1G08420.1	503	607	609	151	963	1245	5.92828	-0.0159996	0.980662	BRI1 suppressor 1 (BSU1)-like 2
AT1G08420.2	505	597	604	152	958	1244	5.91887	-0.00716119	1	BRI1 suppressor 1 (BSU1)-like 2
AT1G08430.1	103	126	82	22	185	216	3.11711	-0.0844273	0.918238	aluminum-activated malate transporter 1
AT1G08440.1	3	5	7	1	5	3	-0.692186	-1.15363	0.345643	Aluminium activated malate transporter family protein
AT1G08450.1	409	394	469	103	686	899	5.51896	-0.0679579	0.567937	calreticulin 3
AT1G08450.2	339	313	388	76	557	726	5.24764	-0.095719	0.37543	calreticulin 3
AT1G08450.3	368	343	411	85	607	761	5.30973	-0.104753	0.338341	calreticulin 3
AT1G08460.1	183	170	201	54	265	364	4.14968	-0.156843	0.402943	histone deacetylase 8
AT1G08465.1	89	75	128	31	158	203	3.53758	-0.0163589	1	Plant-specific transcription factor YABBY family protein
AT1G08470.1	150	169	182	54	323	388	4.23545	0.151111	0.344166	strictosidine synthase-like 3
AT1G08480.1	471	544	509	168	1101	1262	6.05439	0.265428	0.0125071	unknown protein
AT1G08490.1	433	456	538	129	709	874	5.6643	-0.187462	0.10825	chloroplastic NIFS-like cysteine desulfurase
AT1G08500.1	50	59	53	22	113	190	2.61846	0.523155	0.110372	early nodulin-like protein 18
AT1G08510.1	784	775	948	214	1475	1776	6.42242	-0.012083	0.996959	fatty acyl-ACP thioesterases B
AT1G08520.1	1734	1914	2158	531	3145	3937	7.83515	-0.0631914	0.674236	ALBINA 1
AT1G08530.1	89	103	122	33	135	217	3.4742	-0.161386	0.646368	unknown protein
AT1G08540.1	934	1011	1331	293	1767	2236	6.99035	-0.0652918	0.711725	RNApolymerase sigma subunit 2
AT1G08550.1	475	522	636	95	699	849	5.9519	-0.475094	1.56145e-05	non-photochemical quenching 1
AT1G08550.2	466	505	621	93	687	829	5.92313	-0.468721	3.09289e-05	non-photochemical quenching 1
AT1G08560.1	197	257	287	54	524	557	5.10201	0.114235	0.777208	syntaxin of plants 111
AT1G08570.1	856	836	954	172	1215	1392	6.16023	-0.409852	6.06869e-05	atypical CYS HIS rich thioredoxin 4
AT1G08570.2	727	734	806	158	1071	1168	5.95198	-0.384468	0.000204555	atypical CYS HIS rich thioredoxin 4
AT1G08570.3	772	754	865	160	1104	1229	6.02374	-0.410826	8.96567e-05	atypical CYS HIS rich thioredoxin 4
AT1G08570.4	766	752	860	159	1094	1215	6.01476	-0.416422	6.14956e-05	atypical CYS HIS rich thioredoxin 4
AT1G08580.1	312	330	360	72	684	723	5.50006	0.0636681	0.986716	unknown protein
AT1G08590.1	143	139	153	66	375	447	4.05673	0.585249	0.0028003	Leucine-rich receptor-like protein kinase family protein
AT1G08600.1	429	430	508	93	696	954	5.58345	-0.153122	0.198083	P-loop containing nucleoside triphosphate hydrolases superfamily protein
AT1G08600.2	441	432	510	92	709	964	5.59858	-0.157338	0.193274	P-loop containing nucleoside triphosphate hydrolases superfamily protein
AT1G08600.3	440	441	518	96	727	990	5.62124	-0.132852	0.283126	P-loop containing nucleoside triphosphate hydrolases superfamily protein
AT1G08600.4	442	440	516	94	717	973	5.61233	-0.15468	0.192966	P-loop containing nucleoside triphosphate hydrolases superfamily protein
AT1G08610.1	63	50	67	21	114	135	3.38311	0.130676	0.682872	Pentatricopeptide repeat (PPR) superfamily protein
AT1G08620.1	377	416	474	90	584	773	5.32207	-0.28086	0.00390075	Transcription factor jumonji (jmj) family protein / zinc finger (C5HC2 type) family protein
AT1G08620.2	389	429	480	91	609	799	5.35671	-0.267371	0.00536644	Transcription factor jumonji (jmj) family protein / zinc finger (C5HC2 type) family protein
AT1G08630.1	15	28	23	1	10	18	1.34076	-1.67975	0.003503	threonine aldolase 1
AT1G08630.2	15	28	23	1	10	18	1.33227	-1.68076	0.00381899	threonine aldolase 1
AT1G08630.3	15	29	24	1	10	19	1.34783	-1.67513	0.00302433	threonine aldolase 1
AT1G08630.4	15	27	22	1	10	17	1.26699	-1.67973	0.0039027	threonine aldolase 1
AT1G08630.5	14	23	21	1	5	18	1.1364	-1.77249	0.00597736	threonine aldolase 1
AT1G08640.1	555	622	691	176	1105	1239	6.33896	-0.0204293	1	Chloroplast J-like domain 1
AT1G08650.1	242	331	360	82	415	552	5.10136	-0.267108	0.137882	phosphoenolpyruvate carboxylase kinase 1
AT1G08650.2	182	241	251	61	317	403	4.62421	-0.225885	0.311605	phosphoenolpyruvate carboxylase kinase 1
AT1G08660.1	269	281	306	69	409	536	4.90852	-0.220648	0.0566748	MALE GAMETOPHYTE DEFECTIVE 2
AT1G08660.2	278	292	304	69	418	538	4.93635	-0.235944	0.0355465	MALE GAMETOPHYTE DEFECTIVE 2
AT1G08670.1	18	7	16	4	51	68	1.18292	1.02547	0.0612264	ENTH/VHS family protein
AT1G08680.1	339	383	418	100	584	662	5.3125	-0.210971	0.0819407	ARF GAP-like zinc finger-containing protein ZIGA4
AT1G08680.2	333	377	410	96	571	645	5.28695	-0.223948	0.0580234	ARF GAP-like zinc finger-containing protein ZIGA4
AT1G08680.3	315	363	379	93	535	613	5.20156	-0.219631	0.0776174	ARF GAP-like zinc finger-containing protein ZIGA4
AT1G08680.4	322	366	400	94	554	640	5.23616	-0.210125	0.0785355	ARF GAP-like zinc finger-containing protein ZIGA4
AT1G08700.1	223	215	236	71	419	528	4.78449	0.131708	0.363175	Presenilin-1
AT1G08710.1	56	84	70	16	131	151	3.10837	0.0349406	1	F-box family protein
AT1G08710.2	48	72	56	16	113	131	2.84883	0.0967609	0.88534	F-box family protein
AT1G08720.1	230	246	259	54	349	469	4.52716	-0.225227	0.0580009	Protein kinase superfamily protein
AT1G08730.1	14	23	18	9	22	41	0.987236	-0.0617245	1	Myosin family protein with Dil domain
AT1G08750.1	116	119	129	31	197	254	3.69303	-0.0600084	0.813801	Peptidase C13 family
AT1G08750.2	114	119	128	31	195	251	3.67847	-0.0628593	0.81328	Peptidase C13 family
AT1G08750.3	129	128	134	33	212	274	3.79626	-0.0580195	0.812681	Peptidase C13 family
AT1G08760.1	181	180	196	54	301	376	4.23253	-0.0653576	0.881304	Plant protein of unknown function (DUF936)
AT1G08770.1	100	113	104	41	194	221	3.58709	0.0787424	0.639134	prenylated RAB acceptor 1.E
AT1G08780.1	151	185	194	38	313	376	4.43483	-0.0172115	0.892071	ABI3-interacting protein 3
AT1G08800.1	251	201	257	63	387	517	4.48016	-0.0290339	0.999786	Protein of unknown function, DUF593
AT1G08800.2	255	204	261	64	392	525	4.50264	-0.0304741	1	Protein of unknown function, DUF593
AT1G08810.1	68	74	96	19	108	127	2.99064	-0.361958	0.115961	myb domain protein 60
AT1G08810.2	52	53	72	13	80	97	2.63208	-0.357468	0.177762	myb domain protein 60
AT1G08820.1	318	339	365	87	561	666	5.15157	-0.10229	0.503344	vamp/synaptobrevin-associated protein 27-2
AT1G08820.2	328	341	374	89	583	687	5.18032	-0.0843548	0.61298	vamp/synaptobrevin-associated protein 27-2
AT1G08830.1	200	146	207	75	502	554	4.61447	0.566986	0.000391072	copper/zinc superoxide dismutase 1
AT1G08830.2	169	132	194	64	433	463	4.44157	0.495727	0.00435861	copper/zinc superoxide dismutase 1
AT1G08840.1	92	91	98	15	138	176	3.44138	-0.253083	0.140583	DNA replication helicase, putative
AT1G08840.2	100	103	110	19	157	191	3.59961	-0.245123	0.151798	DNA replication helicase, putative
AT1G08845.1	44	50	48	8	89	95	2.66488	-0.0351702	0.864142	Ribosomal L18p/L5e family protein
AT1G08845.2	37	45	41	6	75	82	2.44275	-0.068174	0.77542	Ribosomal L18p/L5e family protein
AT1G08860.1	2	1	1	2	3	3	-1.44325	0.602756	0.712782	Calcium-dependent phospholipid-binding Copine family protein
AT1G08880.1	652	657	719	176	1162	1380	6.33001	-0.047139	0.731732	Histone superfamily protein
AT1G08890.1	114	96	88	32	200	303	3.93013	0.337967	0.251422	Major facilitator superfamily protein
AT1G08900.1	151	131	128	24	153	220	3.5607	-0.535635	0.00586971	Major facilitator superfamily protein
AT1G08900.2	160	137	129	25	160	227	3.62582	-0.538109	0.00572688	Major facilitator superfamily protein
AT1G08900.3	150	128	122	22	158	211	3.5604	-0.524916	0.00519836	Major facilitator superfamily protein
AT1G08910.1	203	223	226	45	347	370	4.70302	-0.24562	0.0793759	zinc ion binding;zinc ion binding
AT1G08920.1	275	251	245	82	507	581	4.86777	0.140639	0.621755	ERD (early response to dehydration) six-like 1
AT1G08920.2	268	234	231	77	476	548	4.77978	0.124072	0.701892	ERD (early response to dehydration) six-like 1
AT1G08920.3	218	188	205	61	420	455	4.53986	0.143034	0.650793	ERD (early response to dehydration) six-like 1
AT1G08930.1	451	494	396	134	987	1238	5.74349	0.274776	0.632272	Major facilitator superfamily protein
AT1G08930.2	450	495	394	134	987	1236	5.74201	0.275954	0.630458	Major facilitator superfamily protein
AT1G08940.1	82	85	80	17	138	185	2.98303	-0.0450563	0.940294	Phosphoglycerate mutase family protein
AT1G08960.1	112	94	137	41	183	213	3.66046	-0.0883813	1	cation exchanger 11
AT1G08970.1	314	267	334	75	497	608	5.06204	-0.104201	0.48658	nuclear factor Y, subunit C9
AT1G08970.2	357	306	371	79	539	641	5.2156	-0.187811	0.113638	nuclear factor Y, subunit C9
AT1G08970.3	340	290	363	80	529	633	5.17649	-0.146381	0.270747	nuclear factor Y, subunit C9
AT1G08970.4	328	279	349	70	476	599	5.11854	-0.214811	0.0666341	nuclear factor Y, subunit C9
AT1G08980.1	187	215	216	38	264	286	4.43187	-0.53454	9.88936e-05	amidase 1
AT1G08990.1	63	76	50	34	192	233	3.02793	0.826641	0.00563232	plant glycogenin-like starch initiation protein 5
AT1G09000.1	64	71	62	23	122	134	2.8525	0.0578643	0.93163	NPK1-related protein kinase 1
AT1G09010.1	709	707	861	164	1171	1411	6.23543	-0.208688	0.0129021	glycoside hydrolase family 2 protein
AT1G09020.1	418	493	514	129	879	1095	5.70945	0.0844354	0.649829	homolog of yeast sucrose nonfermenting 4
AT1G09030.1	1	1	0	1	0	0	-2.46266	-1.10991	1	nuclear factor Y, subunit B4
AT1G09040.1	45	43	64	12	86	91	2.67231	-0.144772	0.754953	unknown protein
AT1G09050.1	40	48	77	12	86	88	2.63603	-0.281776	0.363137	unknown protein
AT1G09060.1	442	472	560	97	653	778	5.58621	-0.414584	4.46916e-06	Zinc finger, RING-type;Transcription factor jumonji/aspartyl beta-hydroxylase
AT1G09060.2	449	481	568	98	659	784	5.60631	-0.425408	1.79285e-06	Zinc finger, RING-type;Transcription factor jumonji/aspartyl beta-hydroxylase
AT1G09060.3	442	475	560	97	656	785	5.58931	-0.408942	5.83024e-06	Zinc finger, RING-type;Transcription factor jumonji/aspartyl beta-hydroxylase
AT1G09070.1	625	717	757	231	1387	1770	6.23491	0.227769	0.158028	soybean gene regulated by cold-2
AT1G09080.1	5	2	13	0	3	13	-0.0412184	-0.902641	0.376952	Heat shock protein 70 (Hsp 70) family protein
AT1G09080.2	6	2	14	0	3	14	0.00972305	-0.966134	0.379035	Heat shock protein 70 (Hsp 70) family protein
AT1G09090.1	49	37	51	23	147	174	2.57816	0.85885	0.0288319	respiratory burst oxidase homolog B
AT1G09090.2	52	40	52	26	148	181	2.63653	0.853007	0.0256305	respiratory burst oxidase homolog B
AT1G09100.1	280	276	314	68	479	593	4.8544	-0.0906157	0.593711	26S proteasome AAA-ATPase subunit RPT5B
AT1G09130.1	1324	1502	1749	346	2337	2798	7.34695	-0.213187	0.00713629	ATP-dependent caseinolytic (Clp) protease/crotonase family protein
AT1G09130.2	1105	1258	1466	294	2024	2457	7.09611	-0.160283	0.0626757	ATP-dependent caseinolytic (Clp) protease/crotonase family protein
AT1G09130.3	1145	1326	1530	302	2078	2524	7.14788	-0.185602	0.0289038	ATP-dependent caseinolytic (Clp) protease/crotonase family protein
AT1G09140.1	615	688	686	170	1083	1188	6.15554	-0.161238	0.0933591	SERINE-ARGININE PROTEIN 30
AT1G09140.2	729	790	814	187	1195	1350	6.36749	-0.232062	0.00517783	SERINE-ARGININE PROTEIN 30
AT1G09150.1	229	220	298	80	485	573	4.98074	0.149859	0.23049	pseudouridine synthase and archaeosine transglycosylase (PUA) domain-containing protein
AT1G09155.1	12	6	5	4	17	25	0.167511	0.532014	0.501616	phloem protein 2-B15
AT1G09157.1	0	0	0	0	1	1	-2.54449	2.48233	1	Protein of unknown function (DUF679)
AT1G09160.1	261	295	297	63	449	496	5.05016	-0.226202	0.069614	Protein phosphatase 2C family protein
AT1G09160.2	244	281	280	62	427	483	4.97947	-0.193901	0.13841	Protein phosphatase 2C family protein
AT1G09170.1	41	28	37	11	98	145	1.9445	0.748022	0.0140314	P-loop nucleoside triphosphate hydrolases superfamily protein with CH (Calponin Homology) domain
AT1G09176.1	3	1	1	0	2	5	-1.56525	-0.000681485	1	unknown protein
AT1G09180.1	18	31	30	4	29	30	1.2593	-0.781779	0.0348929	secretion-associated RAS super family 1
AT1G09190.1	15	21	21	2	42	48	1.64655	0.204206	1	Tetratricopeptide repeat (TPR)-like superfamily protein
AT1G09195.1	51	54	63	5	80	92	2.2783	-0.408219	0.046643	unknown protein
AT1G09195.2	64	69	67	3	78	118	2.53611	-0.517987	0.00419301	unknown protein
AT1G09200.1	705	800	839	226	1453	1671	6.7117	0.0539923	0.783837	Histone superfamily protein
AT1G09210.1	1545	1620	1625	508	3241	4117	7.59212	0.233092	0.00830562	calreticulin 1b
AT1G09220.1	11	15	14	4	18	20	0.772552	-0.38186	0.704052	Pentatricopeptide repeat (PPR) superfamily protein
AT1G09230.1	180	185	232	35	279	302	4.30092	-0.420137	0.000335848	RNA-binding (RRM/RBD/RNP motifs) family protein
AT1G09240.1	40	47	54	2	35	49	2.25507	-1.21315	3.76492e-05	nicotianamine synthase 3
AT1G09250.1	178	189	209	47	341	387	4.42147	-0.0394059	0.874563	basic helix-loop-helix (bHLH) DNA-binding superfamily protein
AT1G09260.1	0	0	0	0	0	0	-2.69872	5.12548e-15	1	Chaperone DnaJ-domain superfamily protein
AT1G09270.1	697	699	741	168	1232	1650	6.21941	0.000584366	1	importin alpha isoform 4
AT1G09270.2	626	632	671	159	1140	1544	6.08455	0.0500563	0.946265	importin alpha isoform 4
AT1G09270.3	661	668	701	165	1180	1570	6.15526	0.0163385	1	importin alpha isoform 4
AT1G09280.1	152	188	184	45	298	344	4.30809	-0.0722145	0.764375	unknown protein
AT1G09290.1	89	108	120	25	188	274	3.70461	0.13951	0.715751	unknown protein
AT1G09300.1	77	86	79	24	132	167	3.43955	-0.0455528	1	Metallopeptidase M24 family protein
AT1G09300.2	83	89	94	27	157	203	3.61514	0.0777518	0.812159	Metallopeptidase M24 family protein
AT1G09310.1	5993	6791	8141	1836	10356	14056	10.0053	-0.12364	0.280895	Protein of unknown function, DUF538
AT1G09320.1	60	73	82	10	110	149	3.09101	-0.163482	0.385918	agenet domain-containing protein
AT1G09330.1	309	312	328	87	591	694	5.12016	0.0624428	0.811216	unknown protein
AT1G09340.1	9574	10436	11838	3145	17812	21147	10.2166	-0.0188255	1	chloroplast RNA binding
AT1G09350.1	7	12	20	2	18	29	1.28611	-0.146333	0.853923	galactinol synthase 3
AT1G09370.1	0	1	0	0	0	2	-2.1453	0.418237	1	Plant invertase/pectin methylesterase inhibitor superfamily protein
AT1G09380.1	4	3	3	2	4	3	-1.38498	-0.560469	1	nodulin MtN21 /EamA-like transporter family protein
AT1G09390.1	153	151	172	40	230	311	3.95858	-0.177524	0.325895	GDSL-like Lipase/Acylhydrolase superfamily protein
AT1G09400.1	7	3	3	0	2	1	-1.45216	-2.42698	0.0189155	FMN-linked oxidoreductases superfamily protein
AT1G09410.1	10	9	10	2	16	19	0.479281	-0.111624	0.997608	pentatricopeptide (PPR) repeat-containing protein
AT1G09415.1	86	118	117	15	147	160	3.31802	-0.466832	0.00301412	NIM1-interacting 3
AT1G09420.1	66	91	75	23	138	159	3.32009	0.00604897	1	glucose-6-phosphate dehydrogenase 4
AT1G09420.2	64	88	75	23	132	159	3.28734	0.00986248	1	glucose-6-phosphate dehydrogenase 4
AT1G09430.1	562	562	686	138	972	1282	5.92597	-0.0937487	0.498214	ATP-citrate lyase A-3
AT1G09440.1	98	121	119	16	166	195	3.41732	-0.331552	0.0528117	Protein kinase superfamily protein
AT1G09450.1	51	59	53	10	100	91	2.68952	-0.163733	0.529401	Protein kinase superfamily protein
AT1G09460.1	39	46	30	11	138	124	2.51376	0.726746	0.0383194	Carbohydrate-binding X8 domain superfamily protein
AT1G09470.1	62	74	76	12	104	139	3.20987	-0.21172	0.312089	unknown protein
AT1G09470.2	62	69	73	9	103	130	3.1238	-0.241138	0.225242	unknown protein
AT1G09480.1	10	15	18	3	19	33	0.88477	-0.118264	0.981944	NAD(P)-binding Rossmann-fold superfamily protein
AT1G09483.1	3	4	3	1	5	11	-0.414495	0.290413	1	unknown protein
AT1G09486.1	96	94	105	29	227	289	3.75404	0.411806	0.015587	pseudogene
AT1G09490.1	295	352	397	78	400	519	4.97142	-0.511115	4.35806e-05	NAD(P)-binding Rossmann-fold superfamily protein
AT1G09490.2	261	302	343	69	326	413	4.73727	-0.602697	2.91249e-06	NAD(P)-binding Rossmann-fold superfamily protein
AT1G09500.1	80	147	260	10	33	71	2.32268	-2.48206	8.64419e-08	NAD(P)-binding Rossmann-fold superfamily protein
AT1G09500.2	71	156	255	10	32	66	2.27965	-2.52664	1.79051e-07	NAD(P)-binding Rossmann-fold superfamily protein
AT1G09500.3	65	114	215	9	26	56	1.9971	-2.47544	2.61003e-07	NAD(P)-binding Rossmann-fold superfamily protein
AT1G09510.1	1	4	4	0	0	0	-2.52271	-4.88003	0.0292461	NAD(P)-binding Rossmann-fold superfamily protein
AT1G09520.1	86	110	102	13	177	223	3.64491	-0.0321056	0.729448	unknown protein
AT1G09530.1	115	106	135	23	155	210	3.6732	-0.344388	0.026212	phytochrome interacting factor 3
AT1G09530.2	110	104	134	23	154	207	3.6482	-0.325452	0.0400291	phytochrome interacting factor 3
AT1G09540.1	30	19	15	9	52	66	1.27388	0.513029	0.283172	myb domain protein 61
AT1G09560.1	860	879	796	658	2483	3212	6.7281	1.04386	4.61065e-05	germin-like protein 5
AT1G09570.1	683	780	852	175	1338	1788	6.42879	-0.00544641	0.994893	phytochrome A
AT1G09570.2	658	761	817	167	1284	1718	6.37584	-0.0152905	0.933031	phytochrome A
AT1G09575.1	16	23	27	3	38	50	1.41426	-0.0170597	1	Protein of unknown function (DUF607)
AT1G09580.1	102	103	118	32	226	295	3.7645	0.303032	0.09464	emp24/gp25L/p24 family/GOLD family protein
AT1G09590.1	1883	2140	2195	645	4964	5559	8.26783	0.337418	0.000110104	Translation protein SH3-like family protein
AT1G09600.1	12	17	18	5	45	48	1.42133	0.591933	0.167836	Protein kinase superfamily protein
AT1G09610.1	10	14	10	5	29	19	0.57607	0.225522	0.788167	Protein of unknown function (DUF579)
AT1G09620.1	1293	1313	1496	388	2638	3243	7.38463	0.128713	0.16581	ATP binding;leucine-tRNA ligases;aminoacyl-tRNA ligases;nucleotide binding;ATP binding;aminoacyl-tRNA ligases
AT1G09630.1	118	176	188	50	328	423	4.33762	0.265402	0.0813262	RAB GTPase 11C
AT1G09640.1	1580	1665	1837	563	3627	4314	7.77614	0.274843	4.15663e-05	Translation elongation factor EF1B, gamma chain
AT1G09640.2	909	983	1091	321	2090	2467	6.9984	0.24263	0.00267231	Translation elongation factor EF1B, gamma chain
AT1G09645.1	117	131	138	41	256	270	3.76649	0.100794	0.655	unknown protein
AT1G09650.1	6	8	6	0	7	9	-0.340252	-0.777166	0.206504	F-box and associated interaction domains-containing protein
AT1G09660.1	262	265	319	86	566	658	5.24575	0.167664	0.19349	RNA-binding KH domain-containing protein
AT1G09660.2	244	244	292	78	521	620	5.12918	0.177659	0.196134	RNA-binding KH domain-containing protein
AT1G09665.1	0	0	0	0	0	0	-2.72215	5.12548e-15	1	Toll-Interleukin-Resistance (TIR) domain family protein
AT1G09680.1	15	8	16	4	18	29	0.829717	-0.0754423	1	Pentatricopeptide repeat (PPR) superfamily protein
AT1G09690.1	2666	3123	3193	825	6697	7679	8.71767	0.229118	0.0194005	Translation protein SH3-like family protein
AT1G09700.1	153	169	191	68	294	343	4.65396	0.0349397	0.736203	dsRNA-binding domain-like superfamily protein
AT1G09710.1	53	61	60	22	102	125	2.99648	0.0674095	0.810853	Homeodomain-like superfamily protein
AT1G09710.2	44	57	52	18	96	117	2.86104	0.136896	0.668997	Homeodomain-like superfamily protein
AT1G09720.1	0	0	0	0	1	0	-2.69873	1.72582	1	Kinase interacting (KIP1-like) family protein
AT1G09730.1	292	343	285	80	523	632	5.10417	-0.046878	0.824612	Cysteine proteinases superfamily protein
AT1G09730.2	298	352	293	82	531	646	5.13304	-0.054423	0.788642	Cysteine proteinases superfamily protein
AT1G09740.1	396	427	383	150	867	1143	5.42666	0.374213	0.148237	Adenine nucleotide alpha hydrolases-like superfamily protein
AT1G09750.1	769	884	954	323	1921	2043	6.94131	0.293194	0.00973663	Eukaryotic aspartyl protease family protein
AT1G09760.1	415	463	485	148	864	928	5.71908	0.0653691	0.5572	U2 small nuclear ribonucleoprotein A
AT1G09770.1	868	975	1038	236	1754	2105	6.82325	0.0157883	1	cell division cycle 5
AT1G09780.1	1398	1570	1610	542	3798	4686	7.68906	0.476847	1.04705e-06	Phosphoglycerate mutase, 2,3-bisphosphoglycerate-independent
AT1G09790.1	4	0	1	0	1	0	-2.24308	-2.35959	0.485953	COBRA-like protein 6 precursor
AT1G09794.1	22	35	19	8	64	43	1.66197	0.148013	0.844898	Cox19 family protein (CHCH motif)
AT1G09795.1	358	449	453	179	826	994	5.90939	0.265663	0.0178542	ATP phosphoribosyl transferase 2
AT1G09800.1	33	49	51	14	86	106	2.70662	0.169379	0.617326	Pseudouridine synthase family protein
AT1G09810.1	89	84	104	27	178	181	3.58224	0.019847	1	evolutionarily conserved C-terminal region 11
AT1G09812.1	9	7	8	2	8	11	-0.168312	-0.641422	0.552675	unknown protein
AT1G09815.1	161	164	198	37	335	356	4.45697	0.00437825	0.998627	polymerase delta 4
AT1G09820.1	68	71	71	18	129	109	2.9589	-0.167724	0.629555	Pentatricopeptide repeat (PPR-like) superfamily protein
AT1G09830.1	267	294	337	99	616	748	5.45155	0.242559	0.0423091	Glycinamide ribonucleotide (GAR) synthetase
AT1G09840.1	377	429	450	129	710	871	5.48232	-0.00656127	1	shaggy-like protein kinase 41
AT1G09840.2	368	423	437	124	689	845	5.43945	-0.0191793	1	shaggy-like protein kinase 41
AT1G09840.3	367	421	432	120	686	832	5.42669	-0.0293924	1	shaggy-like protein kinase 41
AT1G09840.4	362	418	430	122	682	822	5.41974	-0.0252252	1	shaggy-like protein kinase 41
AT1G09840.5	363	416	429	120	681	819	5.41446	-0.0294417	1	shaggy-like protein kinase 41
AT1G09840.6	362	416	429	120	681	819	5.41391	-0.0281871	1	shaggy-like protein kinase 41
AT1G09850.1	235	262	292	72	476	590	4.96876	0.0599328	0.843683	xylem bark cysteine peptidase 3
AT1G09860.1	1	4	0	0	3	2	-1.63042	-0.442212	0.959837	purine permease 16
AT1G09870.1	200	240	278	58	427	532	4.66621	0.0319617	1	histidine acid phosphatase family protein
AT1G09880.1	9	14	15	7	33	26	0.744135	0.431364	0.581653	Rhamnogalacturonate lyase family protein
AT1G09890.1	46	49	53	7	68	92	2.1629	-0.305123	0.196134	Rhamnogalacturonate lyase family protein
AT1G09900.1	170	166	213	57	316	358	4.66159	-0.0324747	1	Pentatricopeptide repeat (PPR-like) superfamily protein
AT1G09910.1	135	154	181	39	204	281	3.92381	-0.301574	0.0696383	Rhamnogalacturonate lyase family protein
AT1G09920.1	263	277	302	81	510	572	4.82496	0.00948108	1	TRAF-type zinc finger-related
AT1G09930.1	0	2	0	0	0	0	-2.26069	-2.87711	0.771714	oligopeptide transporter 2
AT1G09932.1	38	44	36	7	46	67	1.97093	-0.470639	0.348328	Phosphoglycerate mutase family protein
AT1G09932.2	36	43	33	7	41	64	1.88628	-0.489297	0.341665	Phosphoglycerate mutase family protein
AT1G09940.1	159	168	159	43	332	417	4.22484	0.226223	0.207831	Glutamyl-tRNA reductase family protein
AT1G09950.1	2	5	6	2	7	10	-0.344225	0.0941195	1	RESPONSE TO ABA AND SALT 1
AT1G09960.1	66	91	89	24	145	173	3.07975	0.0166513	1	sucrose transporter 4
AT1G09970.1	1329	1436	1474	342	2405	3075	7.02498	-0.0559906	0.846104	Leucine-rich receptor-like protein kinase family protein
AT1G09970.2	1281	1371	1430	332	2329	2971	6.97558	-0.0477749	0.888502	Leucine-rich receptor-like protein kinase family protein
AT1G09980.1	323	390	397	95	583	685	5.31227	-0.161799	0.210534	Putative serine esterase family protein
AT1G09980.2	319	382	397	93	569	670	5.28829	-0.179055	0.151756	Putative serine esterase family protein
AT1G09995.1	25	29	32	4	50	50	1.63433	-0.192437	0.590564	DNA repair DEAD helicase RAD3/XP-D subfamily protein
AT1G10000.1	7	9	3	4	12	19	-0.177542	0.430867	0.561776	Ribonuclease H-like superfamily protein
AT1G10010.1	1	0	0	1	0	0	-2.48261	-0.28927	1	amino acid permease 8
AT1G10020.1	124	136	160	46	279	386	4.1275	0.287448	0.136267	Protein of unknown function (DUF1005)
AT1G10030.1	105	127	124	37	337	378	4.01915	0.5849	0.000656888	homolog of yeast ergosterol28
AT1G10040.1	43	46	36	10	92	106	2.13194	0.249404	0.603289	alpha/beta-Hydrolases superfamily protein
AT1G10040.2	39	43	32	9	85	97	2.01153	0.257492	0.612667	alpha/beta-Hydrolases superfamily protein
AT1G10050.1	143	158	141	44	281	380	3.98647	0.186754	0.529793	glycosyl hydrolase family 10 protein / carbohydrate-binding domain-containing protein
AT1G10060.1	95	99	92	21	120	130	3.79919	-0.529952	0.0184599	branched-chain amino acid transaminase 1
AT1G10060.2	108	106	98	23	132	143	3.96087	-0.521181	0.0091822	branched-chain amino acid transaminase 1
AT1G10060.3	98	95	84	18	120	121	3.79775	-0.557375	0.00480204	branched-chain amino acid transaminase 1
AT1G10070.1	32	41	41	4	39	54	1.77996	-0.744496	0.0879799	branched-chain amino acid transaminase 2
AT1G10070.2	32	41	41	4	36	54	1.75374	-0.790541	0.0717716	branched-chain amino acid transaminase 2
AT1G10070.3	31	39	41	4	37	55	1.73429	-0.724046	0.107129	branched-chain amino acid transaminase 2
AT1G10090.1	237	244	239	76	386	519	4.92951	-0.00965772	1	Early-responsive to dehydration stress protein (ERD4)
AT1G10095.1	90	108	75	154	210	162	3.72892	1.34755	0.00114469	Protein prenylyltransferase superfamily protein
AT1G10100.1	0	0	0	0	0	1	-2.56565	1.71764	1	unknown protein
AT1G10110.1	3	7	7	1	10	9	-0.181434	-0.223029	0.950105	F-box family protein
AT1G10120.1	208	224	237	57	371	426	4.5297	-0.110166	0.517021	basic helix-loop-helix (bHLH) DNA-binding superfamily protein
AT1G10130.1	432	485	521	133	796	932	5.68487	-0.0825105	0.610064	endoplasmic reticulum-type calcium-transporting ATPase 3
AT1G10140.1	79	82	76	16	197	204	3.19026	0.303388	0.389304	Uncharacterised conserved protein UCP031279
AT1G10150.1	185	192	220	50	379	459	4.25146	0.0970837	0.752963	Carbohydrate-binding protein
AT1G10155.1	12	17	20	1	16	20	0.10452	-0.863932	0.0329328	phloem protein 2-A10
AT1G10170.1	383	439	487	99	781	948	5.5953	-0.00970599	0.947067	NF-X-like 1
AT1G10180.1	285	275	298	91	432	559	4.98745	-0.111575	0.659792	unknown protein
AT1G10200.1	378	379	416	125	805	968	5.8231	0.227715	0.0247677	GATA type zinc finger transcription factor family protein
AT1G10210.1	45	43	57	18	73	109	2.43783	0.00971745	0.998606	mitogen-activated protein kinase 1
AT1G10210.2	43	44	56	18	72	101	2.39324	-0.034371	1	mitogen-activated protein kinase 1
AT1G10220.1	6	6	6	3	15	8	-0.793812	0.0884416	0.977836	unknown protein
AT1G10220.2	1	0	1	0	0	0	-2.42401	-2.87604	0.771714	unknown protein
AT1G10230.1	68	71	108	14	136	187	3.50594	-0.0425961	0.835993	SKP1-like 18
AT1G10240.1	94	97	123	25	142	193	3.53388	-0.26532	0.172982	FAR1-related sequence 11
AT1G10250.1	3	4	5	1	9	9	-0.349426	0.195312	1	unknown protein
AT1G10270.1	104	151	130	47	288	365	4.36434	0.397472	0.00925339	glutamine-rich protein 23
AT1G10280.1	49	83	69	23	121	142	2.76059	0.0586132	0.867158	Core-2/I-branching beta-1,6-N-acetylglucosaminyltransferase family protein
AT1G10290.1	839	972	1011	262	1760	2089	6.77503	0.0700624	0.615561	dynamin-like protein 6
AT1G10300.1	13	24	18	4	29	50	0.954501	0.103264	1	Nucleolar GTP-binding protein
AT1G10310.1	196	219	235	44	333	405	4.63347	-0.206284	0.0926553	NAD(P)-binding Rossmann-fold superfamily protein
AT1G10320.1	131	127	159	22	230	269	3.93765	-0.173757	0.275733	Zinc finger C-x8-C-x5-C-x3-H type family protein
AT1G10330.1	15	16	20	3	23	35	1.15481	-0.212416	0.771714	Tetratricopeptide repeat (TPR)-like superfamily protein
AT1G10340.1	33	36	38	8	46	82	1.38381	-0.164415	0.910457	Ankyrin repeat family protein
AT1G10340.2	29	31	36	7	43	76	1.29243	-0.124522	0.975747	Ankyrin repeat family protein
AT1G10350.1	131	135	168	38	250	298	3.97637	-0.0296857	0.990855	DNAJ heat shock family protein
AT1G10360.1	324	354	373	110	560	626	5.25055	-0.133974	0.497324	glutathione S-transferase TAU 18
AT1G10370.1	887	995	1257	328	1547	1864	6.73459	-0.119636	0.583692	Glutathione S-transferase family protein
AT1G10380.1	195	163	172	53	229	272	4.01914	-0.341772	0.193038	Putative membrane lipoprotein
AT1G10385.1	1	2	0	1	5	5	-1.62988	1.32724	0.364541	Vps51/Vps67 family (components of vesicular transport) protein
AT1G10390.1	742	753	767	252	1299	1679	6.497	0.0759243	0.544626	Nucleoporin autopeptidase
AT1G10390.2	745	756	770	253	1306	1683	6.50485	0.0760027	0.547831	Nucleoporin autopeptidase
AT1G10400.1	10	9	5	0	12	25	-0.0188725	0.0448062	1	UDP-Glycosyltransferase superfamily protein
AT1G10410.1	376	384	401	105	631	811	5.49235	-0.0531322	0.81532	Protein of unknown function (DUF1336)
AT1G10417.1	10	10	3	1	21	19	0.374437	0.341104	0.93637	unknown protein
AT1G10430.1	183	223	250	58	430	511	4.63654	0.136228	0.471409	protein phosphatase 2A-2
AT1G10450.1	301	296	303	74	508	600	5.04727	-0.076323	0.568921	SIN3-like 6
AT1G10455.1	0	0	0	0	0	0	-2.63051	5.12548e-15	1	unknown protein
AT1G10460.1	18	6	22	4	22	37	0.851443	-0.0176839	1	germin-like protein 7
AT1G10470.1	997	974	1106	279	1856	2170	6.82132	0.00858835	1	response regulator 4
AT1G10480.1	57	61	46	7	79	125	2.4947	-0.196698	0.584601	zinc finger protein 5
AT1G10490.1	421	432	449	109	792	886	5.73692	-0.0172246	0.950408	Domain of unknown function (DUF1726) ;Putative ATPase (DUF699)
AT1G10500.1	549	618	752	162	887	1009	5.93362	-0.33174	0.00123129	chloroplast-localized ISCA-like protein
AT1G10510.1	464	481	550	118	829	1043	5.94887	-0.0665799	0.550959	RNI-like superfamily protein
AT1G10520.1	27	22	17	5	37	47	1.45681	-0.0397219	1	DNA polymerase lambda (POLL)
AT1G10522.1	166	182	183	59	390	372	4.88191	0.180638	0.298264	unknown protein
AT1G10522.2	177	209	191	118	430	400	5.00535	0.427826	0.00794441	unknown protein
AT1G10530.1	21	15	16	6	47	44	1.08017	0.434784	0.346418	unknown protein
AT1G10540.1	10	9	10	1	9	6	0.251573	-1.29672	0.0376166	nucleobase-ascorbate transporter 8
AT1G10550.1	10	11	22	5	7	23	0.566263	-0.544349	0.837399	xyloglucan:xyloglucosyl transferase 33
AT1G10560.1	24	18	19	10	57	90	1.28638	0.869237	0.0530076	plant U-box 18
AT1G10570.1	177	192	190	33	303	339	4.32313	-0.207951	0.0967068	Cysteine proteinases superfamily protein
AT1G10570.2	179	190	189	34	300	350	4.32861	-0.185998	0.136508	Cysteine proteinases superfamily protein
AT1G10580.1	327	368	440	79	596	738	5.39072	-0.162251	0.117576	Transducin/WD40 repeat-like superfamily protein
AT1G10585.1	9	44	95	4	11	40	0.410479	-1.85052	0.0213843	basic helix-loop-helix (bHLH) DNA-binding superfamily protein
AT1G10586.1	0	0	0	0	1	0	-2.67567	1.72543	1	basic helix-loop-helix (bHLH) DNA-binding superfamily protein
AT1G10586.2	0	0	0	0	1	0	-2.67567	1.72543	1	basic helix-loop-helix (bHLH) DNA-binding superfamily protein
AT1G10590.1	591	579	703	167	1126	1400	6.23894	0.0482517	0.855937	Nucleic acid-binding, OB-fold-like protein
AT1G10590.2	575	560	678	164	1095	1367	6.19986	0.0596196	0.768452	Nucleic acid-binding, OB-fold-like protein
AT1G10590.3	575	560	678	164	1095	1362	6.19738	0.0573364	0.778082	Nucleic acid-binding, OB-fold-like protein
AT1G10600.1	114	119	148	28	195	222	3.86355	-0.239423	0.200168	associated molecule with the SH3 domain of STAM 2
AT1G10600.2	103	107	127	27	179	197	3.70903	-0.201678	0.351167	associated molecule with the SH3 domain of STAM 2
AT1G10600.3	105	115	139	25	177	210	3.74934	-0.268291	0.161802	associated molecule with the SH3 domain of STAM 2
AT1G10610.1	68	66	90	13	111	123	3.02453	-0.326697	0.118971	basic helix-loop-helix (bHLH) DNA-binding superfamily protein
AT1G10620.1	0	0	0	0	0	0	-2.6084	5.12548e-15	1	Protein kinase superfamily protein
AT1G10630.1	457	503	544	169	1093	1238	6.01667	0.273193	0.00622988	ADP-ribosylation factor A1F
AT1G10640.1	419	456	461	71	460	596	5.35536	-0.72887	2.89393e-06	Pectin lyase-like superfamily protein
AT1G10650.1	232	250	292	61	454	510	4.67669	-0.0618271	0.665953	SBP (S-ribonuclease binding protein) family protein
AT1G10650.2	219	238	282	55	425	483	4.60475	-0.0875825	0.500558	SBP (S-ribonuclease binding protein) family protein
AT1G10657.1	80	86	104	29	189	221	3.39038	0.239134	0.229669	Plant protein 1589 of unknown function
AT1G10657.2	94	102	114	33	218	259	3.60196	0.253446	0.195169	Plant protein 1589 of unknown function
AT1G10657.3	84	101	116	34	234	276	3.58659	0.388234	0.0239987	Plant protein 1589 of unknown function
AT1G10657.4	70	85	93	27	189	219	3.33134	0.345505	0.0761027	Plant protein 1589 of unknown function
AT1G10660.1	229	284	317	75	422	484	4.8488	-0.204083	0.197923	unknown protein
AT1G10660.2	235	288	319	73	418	480	4.85111	-0.241537	0.103016	unknown protein
AT1G10660.3	233	284	314	73	413	477	4.8387	-0.234481	0.118807	unknown protein
AT1G10660.4	233	282	313	73	413	473	4.83079	-0.234676	0.1167	unknown protein
AT1G10670.1	1806	1885	2080	534	3762	4776	7.84721	0.153172	0.0635228	ATP-citrate lyase A-1
AT1G10670.2	1753	1852	2047	531	3668	4666	7.8176	0.155473	0.0479831	ATP-citrate lyase A-1
AT1G10670.3	1706	1795	1961	516	3568	4536	7.77826	0.163902	0.0362824	ATP-citrate lyase A-1
AT1G10670.4	1746	1842	2037	528	3652	4631	7.8126	0.15402	0.0497536	ATP-citrate lyase A-1
AT1G10680.1	5	7	1	1	13	18	-0.60418	0.806586	0.423799	P-glycoprotein 10
AT1G10690.1	22	20	22	5	30	35	1.27659	-0.331274	0.523482	unknown protein
AT1G10700.1	164	178	184	71	315	425	4.35628	0.17977	0.153251	phosphoribosyl pyrophosphate (PRPP) synthase 3
AT1G10710.1	1	3	2	2	4	1	-1.07553	-0.194005	1	poor homologous synapsis 1
AT1G10710.2	2	4	3	2	6	2	-0.938519	-0.271886	1	poor homologous synapsis 1
AT1G10720.1	186	190	211	46	321	379	4.37086	-0.119911	0.386398	BSD domain-containing protein
AT1G10730.1	55	56	64	16	99	132	2.77817	0.0293947	1	Clathrin adaptor complexes medium subunit family protein
AT1G10740.1	298	311	365	91	607	748	4.99654	0.0996652	0.578299	alpha/beta-Hydrolases superfamily protein
AT1G10740.2	287	303	347	87	594	715	4.93455	0.104084	0.574793	alpha/beta-Hydrolases superfamily protein
AT1G10740.3	286	296	346	86	576	715	4.91401	0.0974446	0.617241	alpha/beta-Hydrolases superfamily protein
AT1G10740.4	284	296	345	86	570	711	4.90481	0.0922699	0.645535	alpha/beta-Hydrolases superfamily protein
AT1G10747.1	0	0	0	0	0	0	-2.72217	5.12548e-15	1	Maternally expressed gene (MEG) family protein
AT1G10750.1	26	26	42	13	65	89	2.13253	0.368468	0.193678	Protein of Unknown Function (DUF239)
AT1G10760.1	961	1199	1334	338	1842	2419	7.72461	-0.0462281	0.850814	Pyruvate phosphate dikinase, PEP/pyruvate binding domain
AT1G10770.1	0	0	0	0	0	3	-1.74675	2.97245	0.771714	Plant invertase/pectin methylesterase inhibitor superfamily protein
AT1G10780.1	70	79	80	19	130	147	3.22674	-0.092942	0.783741	F-box/RNI-like superfamily protein
AT1G10790.1	10	5	17	3	17	15	-0.0929512	-0.309648	0.884189	unknown protein
AT1G10800.1	3	3	10	0	8	14	-0.508267	-0.0193128	0.94983	unknown protein
AT1G10810.1	8	23	25	5	37	53	1.12008	0.287142	0.673782	NAD(P)-linked oxidoreductase superfamily protein
AT1G10820.1	151	171	195	53	268	349	4.39673	-0.0824136	0.834563	Protein of unknown function (DUF3755)
AT1G10820.2	154	188	220	56	285	386	4.48363	-0.0846667	0.813157	Protein of unknown function (DUF3755)
AT1G10830.1	225	246	283	68	349	458	4.74936	-0.240993	0.0723594	15-cis-zeta-carotene isomerase
AT1G10830.2	210	222	256	63	316	399	4.60944	-0.276436	0.04435	15-cis-zeta-carotene isomerase
AT1G10840.1	735	759	781	263	1545	1984	6.56669	0.27297	0.000334984	translation initiation factor 3 subunit H1
AT1G10840.2	611	657	673	233	1314	1667	6.345	0.27083	0.000329884	translation initiation factor 3 subunit H1
AT1G10850.1	294	298	332	84	572	628	5.2584	0.0123056	1	Leucine-rich repeat protein kinase family protein
AT1G10865.1	99	109	102	31	189	262	3.62293	0.165658	0.496208	unknown protein
AT1G10865.2	79	82	88	24	147	206	3.3058	0.127036	0.73477	unknown protein
AT1G10870.1	255	272	293	63	460	544	4.82568	-0.0910159	0.461691	ARF-GAP domain 4
AT1G10880.1	0	0	0	0	0	0	-2.67563	5.12548e-15	1	Core-2/I-branching beta-1,6-N-acetylglucosaminyltransferase family protein
AT1G10890.1	306	307	295	59	440	554	5.02273	-0.270729	0.0144783	unknown protein
AT1G10900.1	742	794	847	207	1122	1514	6.27493	-0.200555	0.0615076	Phosphatidylinositol-4-phosphate 5-kinase family protein
AT1G10910.1	366	389	427	106	546	631	5.40588	-0.313467	0.0215135	Pentatricopeptide repeat (PPR) superfamily protein
AT1G10920.1	99	98	124	16	116	120	3.26831	-0.808778	1.02576e-06	NB-ARC domain-containing disease resistance protein
AT1G10920.2	98	98	123	16	115	118	3.25944	-0.81651	9.24303e-07	NB-ARC domain-containing disease resistance protein
AT1G10930.1	219	242	273	65	428	474	5.12805	-0.0614097	0.812242	DNA helicase (RECQl4A)
AT1G10940.1	532	558	630	120	829	1080	5.95967	-0.244291	0.00811043	Protein kinase superfamily protein
AT1G10940.2	497	517	572	112	758	985	5.8489	-0.254319	0.00814955	Protein kinase superfamily protein
AT1G10950.1	968	1115	1139	323	2188	2634	6.95538	0.195599	0.0360649	transmembrane nine 1
AT1G10960.1	3182	3513	4282	1563	7717	9442	8.79382	0.395561	4.42321e-05	ferredoxin 1
AT1G10970.1	42	52	54	15	111	168	2.86178	0.494479	0.086777	zinc transporter 4 precursor
AT1G10980.1	8	6	8	3	4	5	-0.169343	-1.29284	0.247301	Lung seven transmembrane receptor family protein
AT1G10990.1	35	30	25	7	44	63	1.5585	-0.144623	0.8862	unknown protein
AT1G10990.2	33	28	24	7	47	70	1.59336	0.0535961	1	unknown protein
AT1G11000.1	83	67	67	30	168	208	3.31763	0.441926	0.0238457	Seven transmembrane MLO family protein
AT1G11020.1	116	120	132	39	200	261	3.70157	-0.012928	1	RING/FYVE/PHD zinc finger superfamily protein
AT1G11040.1	0	0	0	0	0	0	-2.60843	5.12548e-15	1	HSP40/DnaJ peptide-binding protein
AT1G11050.1	117	122	136	42	233	283	3.53784	0.120507	0.605768	Protein kinase superfamily protein
AT1G11055.1	3	4	2	2	4	6	-1.2098	-0.0376707	1	pseudogene
AT1G11060.1	186	164	168	47	301	352	4.25497	-0.031189	0.97467	WAPL (Wings apart-like protein regulation of heterochromatin) protein
AT1G11070.1	12	13	14	5	25	38	0.442551	0.335632	0.636225	unknown protein
AT1G11080.1	238	269	178	48	352	411	4.17582	-0.265942	0.375206	serine carboxypeptidase-like 31
AT1G11080.2	225	239	164	45	317	394	4.05147	-0.242687	0.419628	serine carboxypeptidase-like 31
AT1G11090.1	109	130	157	35	179	225	3.71541	-0.301719	0.129373	alpha/beta-Hydrolases superfamily protein
AT1G11100.1	39	46	25	10	72	73	1.92461	0.0210564	1	SNF2 domain-containing protein / helicase domain-containing protein / zinc finger protein-related
AT1G11100.2	38	49	28	10	78	77	1.99772	0.0466415	1	SNF2 domain-containing protein / helicase domain-containing protein / zinc finger protein-related
AT1G11110.1	0	0	0	0	0	0	-2.56555	5.12548e-15	1	LisH and RanBPM domains containing protein
AT1G11112.1	12	16	17	5	21	25	0.832539	-0.274551	0.850468	unknown protein
AT1G11120.1	17	28	20	6	29	52	1.32233	-0.048912	1	unknown protein
AT1G11120.2	22	39	32	7	39	63	1.68593	-0.241103	0.63019	unknown protein
AT1G11125.1	12	11	19	4	25	18	0.66298	-0.282739	0.851035	unknown protein
AT1G11130.1	302	330	374	88	592	666	5.22567	-0.0427543	0.880319	Leucine-rich repeat protein kinase family protein
AT1G11145.1	0	1	0	0	0	0	-2.6986	-2.06094	1	Protein of unknown function (DUF674)
AT1G11160.1	66	57	58	21	113	135	2.73708	0.115819	0.771714	Transducin/WD40 repeat-like superfamily protein
AT1G11170.1	38	52	41	9	69	67	1.87673	-0.317168	0.439966	Protein of unknown function (DUF707)
AT1G11170.2	34	53	36	8	62	60	1.7628	-0.385133	0.353487	Protein of unknown function (DUF707)
AT1G11180.1	73	83	102	29	126	122	3.40794	-0.32298	0.330495	Secretory carrier membrane protein (SCAMP) family protein
AT1G11180.2	65	78	96	26	121	109	3.29969	-0.323679	0.347873	Secretory carrier membrane protein (SCAMP) family protein
AT1G11190.1	68	92	79	14	103	159	2.89483	-0.287308	0.249661	bifunctional nuclease i
AT1G11200.1	97	106	102	37	181	213	3.57708	0.0477755	0.812681	Protein of unknown function (DUF300)
AT1G11210.1	10	12	14	2	16	19	0.979242	-0.421106	0.537536	Protein of unknown function (DUF761)
AT1G11220.1	16	22	22	5	43	50	1.59174	0.238299	0.738381	Protein of unknown function (DUF761)
AT1G11230.1	0	0	0	0	0	0	-2.72216	5.12548e-15	1	Protein of unknown function (DUF761)
AT1G11230.2	0	0	0	0	0	0	-2.72216	5.12548e-15	1	Protein of unknown function (DUF761)
AT1G11240.1	197	234	215	49	438	521	4.86812	0.152347	0.529772	unknown protein
AT1G11250.1	0	0	2	0	1	0	-2.03803	-1.14974	1	syntaxin of plants 125
AT1G11260.1	792	731	714	122	919	1143	6.06083	-0.562113	0.000908402	sugar transporter 1
AT1G11270.1	28	42	33	6	59	66	2.12038	-0.123611	0.741805	F-box and associated interaction domains-containing protein
AT1G11270.2	34	35	35	4	67	66	2.21688	-0.0820465	0.71415	F-box and associated interaction domains-containing protein
AT1G11270.3	30	29	27	2	57	55	1.92986	-0.0889245	0.682936	F-box and associated interaction domains-containing protein
AT1G11280.1	294	302	350	78	510	554	5.10579	-0.186452	0.127877	S-locus lectin protein kinase family protein
AT1G11280.2	300	304	361	81	518	578	5.13447	-0.171576	0.172306	S-locus lectin protein kinase family protein
AT1G11280.3	279	293	342	78	485	548	5.06809	-0.17514	0.183559	S-locus lectin protein kinase family protein
AT1G11280.4	273	291	331	75	477	524	5.03805	-0.190987	0.137504	S-locus lectin protein kinase family protein
AT1G11290.1	44	61	62	16	86	114	2.69158	-0.0879582	0.956025	Pentatricopeptide repeat (PPR) superfamily protein
AT1G11300.1	143	164	150	39	237	324	4.03143	-0.0774949	0.741805	protein serine/threonine kinases;protein kinases;ATP binding;sugar binding;kinases;carbohydrate binding
AT1G11310.1	950	959	964	262	1597	2071	6.5855	-0.0232506	0.983456	Seven transmembrane MLO family protein
AT1G11310.2	890	896	914	251	1494	1948	6.49964	-0.018478	1	Seven transmembrane MLO family protein
AT1G11320.1	30	38	51	11	65	57	2.18073	-0.282343	0.539519	unknown protein
AT1G11330.1	147	176	199	42	229	293	3.85731	-0.338999	0.0803056	S-locus lectin protein kinase family protein
AT1G11330.2	152	177	205	45	233	298	3.8837	-0.335199	0.091659	S-locus lectin protein kinase family protein
AT1G11340.1	22	23	17	0	20	27	1.03678	-0.877339	0.00280548	S-locus lectin protein kinase family protein
AT1G11350.1	149	130	172	40	244	296	4.17561	-0.0986786	0.666477	S-domain-1 13
AT1G11360.1	191	215	198	37	344	412	4.45661	-0.0999429	0.421425	Adenine nucleotide alpha hydrolases-like superfamily protein
AT1G11360.2	170	195	183	34	312	365	4.29158	-0.110935	0.405856	Adenine nucleotide alpha hydrolases-like superfamily protein
AT1G11360.3	183	210	189	35	334	388	4.39362	-0.115787	0.392958	Adenine nucleotide alpha hydrolases-like superfamily protein
AT1G11360.4	179	202	187	35	329	375	4.3502	-0.109383	0.409493	Adenine nucleotide alpha hydrolases-like superfamily protein
AT1G11370.1	0	0	0	0	0	0	-2.60854	5.12548e-15	1	Pectin lyase-like superfamily protein
AT1G11380.1	67	55	77	28	151	151	3.07231	0.316977	0.334068	PLAC8 family protein
AT1G11390.1	158	174	176	58	322	412	4.36964	0.180895	0.220306	Protein kinase superfamily protein
AT1G11400.1	140	146	195	34	270	314	4.13987	-0.104385	0.457965	partner of Y14-MAGO
AT1G11400.2	159	157	210	40	284	345	4.25893	-0.118251	0.403042	partner of Y14-MAGO
AT1G11400.3	133	143	191	36	257	301	4.07539	-0.116108	0.469956	partner of Y14-MAGO
AT1G11410.1	298	303	390	57	363	499	4.99923	-0.582577	9.15487e-07	S-locus lectin protein kinase family protein
AT1G11420.1	51	50	61	8	79	121	2.51059	-0.129456	0.560278	DOMAIN OF UNKNOWN FUNCTION 724 2
AT1G11430.1	747	802	926	209	1507	1604	6.78906	-0.0460399	0.782483	plastid developmental protein DAG, putative
AT1G11440.1	105	110	143	22	196	239	3.5391	-0.135895	0.50382	unknown protein
AT1G11450.1	75	86	99	17	107	136	2.95348	-0.463074	0.0187494	nodulin MtN21 /EamA-like transporter family protein
AT1G11450.2	63	69	83	18	91	115	2.67643	-0.397833	0.0950323	nodulin MtN21 /EamA-like transporter family protein
AT1G11460.1	10	9	12	1	14	21	0.551626	-0.247458	0.695797	nodulin MtN21 /EamA-like transporter family protein
AT1G11475.1	217	195	227	46	375	407	4.73188	-0.105971	0.518796	RNA polymerases N / 8 kDa subunit
AT1G11480.1	469	484	541	115	937	1163	5.85191	0.0621029	0.926806	eukaryotic translation initiation factor-related
AT1G11480.2	452	468	510	108	897	1124	5.80133	0.0632362	0.938109	eukaryotic translation initiation factor-related
AT1G11482.1	0	1	0	0	2	3	-2.02337	1.57721	0.875708	pseudogene
AT1G11490.1	5	1	2	0	14	14	-0.953566	1.25256	0.357313	zinc finger (C2H2 type) family protein
AT1G11500.1	3	4	1	1	8	8	-0.959586	0.6029	0.782201	Protein of unknown function (DUF1218)
AT1G11510.1	0	0	0	0	0	1	-2.67568	1.71271	1	DNA-binding storekeeper protein-related transcriptional regulator
AT1G11520.1	2	3	3	0	3	5	-1.0602	-0.453117	0.671601	pliceosome associated protein-related
AT1G11530.1	113	92	126	10	120	123	3.23971	-0.866148	2.4778e-07	C-terminal cysteine residue is changed to a serine 1
AT1G11540.1	16	19	11	6	31	45	0.783229	0.366124	0.53058	Sulfite exporter TauE/SafE family protein
AT1G11545.1	195	194	185	97	606	751	4.68082	0.866753	8.05011e-08	xyloglucan endotransglucosylase/hydrolase 8
AT1G11560.1	1	0	1	0	2	1	-2.22664	0.105065	1	Oligosaccharyltransferase complex/magnesium transporter family protein
AT1G11570.1	6	4	6	1	7	6	-0.42372	-0.637163	0.60866	NTF2-like
AT1G11570.2	6	4	8	1	8	16	-0.0989895	0.000628162	1	NTF2-like
AT1G11572.1	2	1	2	1	1	1	-2.29488	-1.07431	0.956025	Plant thionin family protein
AT1G11580.1	979	1093	1064	322	2168	2662	6.78615	0.220718	0.341486	methylesterase PCR A
AT1G11590.1	4	1	7	0	5	7	-1.15314	-0.457268	0.644963	Plant invertase/pectin methylesterase inhibitor superfamily
AT1G11600.1	121	152	137	31	217	285	4.50805	-0.0986833	0.637783	cytochrome P450, family 77, subfamily B, polypeptide 1
AT1G11608.1	0	0	0	0	0	0	-2.72214	5.12548e-15	1	F-box associated ubiquitination effector family protein
AT1G11610.1	13	25	8	3	21	32	0.240626	-0.23108	0.874563	cytochrome P450, family 71, subfamily A, polypeptide 18
AT1G11610.2	13	25	8	3	21	32	0.240626	-0.231077	0.874563	cytochrome P450, family 71, subfamily A, polypeptide 18
AT1G11620.1	0	0	0	0	0	1	-2.65294	1.71402	1	F-box and associated interaction domains-containing protein
AT1G11630.1	68	66	89	13	117	134	3.15255	-0.222178	0.23529	Tetratricopeptide repeat (TPR)-like superfamily protein
AT1G11650.1	1530	1655	1904	490	3073	3996	7.66413	0.0971774	0.239149	RNA-binding (RRM/RBD/RNP motifs) family protein
AT1G11650.2	1655	1804	2062	507	3276	4247	7.7735	0.0608928	0.577208	RNA-binding (RRM/RBD/RNP motifs) family protein
AT1G11655.1	2	3	3	1	6	10	-1.20086	0.601115	0.780594	unknown protein
AT1G11660.1	406	414	482	111	768	980	5.59707	0.0309343	1	heat shock protein 70 (Hsp 70) family protein
AT1G11670.1	255	219	221	113	610	838	4.88222	0.705823	5.96479e-06	MATE efflux family protein
AT1G11680.1	723	801	794	287	1662	1977	6.52079	0.313109	0.000563473	CYTOCHROME P450 51G1
AT1G11684.1	0	0	0	1	1	0	-2.58666	2.52817	0.509101	unknown protein
AT1G11690.1	0	2	1	0	0	1	-2.22664	-1.67824	0.513338	unknown protein
AT1G11700.1	230	216	217	42	258	357	4.56573	-0.492264	0.000933979	Protein of unknown function, DUF584
AT1G11710.1	40	38	50	10	53	59	2.31387	-0.526481	0.0716468	Pentatricopeptide repeat (PPR) superfamily protein
AT1G11720.1	718	777	916	171	1117	1477	6.33017	-0.280175	0.000821217	starch synthase 3
AT1G11720.2	731	791	929	172	1127	1505	6.35413	-0.285335	0.000524803	starch synthase 3
AT1G11730.1	31	13	31	5	38	34	1.41	-0.417938	0.41614	Galactosyltransferase family protein
AT1G11735.1	1	0	1	0	1	0	-2.03808	-1.15191	1	MIR171B; miRNA
AT1G11740.1	12	15	15	5	35	33	0.674117	0.341982	0.624267	ankyrin repeat family protein
AT1G11750.1	690	731	885	273	1382	1598	6.52462	0.08803	0.407421	CLP protease proteolytic subunit 6
AT1G11750.2	658	697	853	255	1304	1494	6.44792	0.0568719	0.608996	CLP protease proteolytic subunit 6
AT1G11755.1	74	74	88	25	159	167	3.34477	0.112224	0.635081	Undecaprenyl pyrophosphate synthetase family protein
AT1G11760.1	51	59	62	17	93	105	2.67359	-0.131061	0.823611	unknown protein
AT1G11770.1	0	0	0	0	0	0	-2.60843	5.12548e-15	1	FAD-binding Berberine family protein
AT1G11780.1	97	103	134	41	227	263	3.83118	0.214208	0.157706	oxidoreductase, 2OG-Fe(II) oxygenase family protein
AT1G11785.1	1	5	2	0	0	3	-1.81951	-1.7474	0.148261	unknown protein
AT1G11790.1	235	327	311	102	479	552	5.06478	-0.0460902	1	arogenate dehydratase 1
AT1G11790.2	219	301	294	90	443	518	4.96189	-0.0664512	0.96948	arogenate dehydratase 1
AT1G11800.1	65	67	58	16	115	117	3.05767	-0.079091	0.870924	endonuclease/exonuclease/phosphatase family protein
AT1G11810.1	0	0	0	0	0	2	-2.54468	2.47589	1	F-box associated ubiquitination effector family protein
AT1G11820.1	312	336	392	82	597	712	5.45544	-0.0554495	0.704409	O-Glycosyl hydrolases family 17 protein
AT1G11820.2	421	427	486	106	750	897	5.81449	-0.0819263	0.50896	O-Glycosyl hydrolases family 17 protein
AT1G11840.1	3418	3794	4113	983	6032	7490	8.73009	-0.106442	0.223711	glyoxalase I homolog
AT1G11840.2	3478	3886	4202	1002	6194	7687	8.75755	-0.101621	0.255411	glyoxalase I homolog
AT1G11840.3	3374	3762	4067	966	5971	7368	8.71305	-0.111597	0.194468	glyoxalase I homolog
AT1G11840.4	3392	3774	4087	976	5992	7409	8.71932	-0.109246	0.208545	glyoxalase I homolog
AT1G11840.5	3098	3516	3762	908	5569	6936	8.60632	-0.0933305	0.321346	glyoxalase I homolog
AT1G11840.6	3395	3778	4088	976	6000	7417	8.72086	-0.109027	0.209307	glyoxalase I homolog
AT1G11850.1	176	208	246	33	324	431	4.59814	-0.200136	0.220852	unknown protein
AT1G11850.2	178	213	251	35	330	434	4.62129	-0.200885	0.215089	unknown protein
AT1G11850.3	172	206	240	28	315	409	4.54937	-0.250349	0.11881	unknown protein
AT1G11850.4	177	208	247	33	324	430	4.59845	-0.206723	0.205695	unknown protein
AT1G11860.1	11737	12680	14608	3446	22416	27584	10.4915	-0.0266401	0.916665	Glycine cleavage T-protein family
AT1G11860.2	11343	12245	14111	3298	21562	26453	10.4431	-0.0365403	0.832197	Glycine cleavage T-protein family
AT1G11860.3	10537	11414	13169	3117	20253	25129	10.3369	-0.0160094	1	Glycine cleavage T-protein family
AT1G11870.1	197	230	265	79	450	506	4.92254	0.129924	0.27333	Seryl-tRNA synthetase
AT1G11870.2	206	238	279	82	463	527	4.96982	0.117048	0.310237	Seryl-tRNA synthetase
AT1G11870.3	191	227	255	71	426	491	4.86627	0.0971676	0.47993	Seryl-tRNA synthetase
AT1G11880.1	49	61	58	13	89	115	2.52574	-0.0959195	0.764475	transferases, transferring hexosyl groups
AT1G11890.1	291	311	374	111	563	715	5.14012	0.0611903	0.570778	Synaptobrevin family protein
AT1G11900.1	38	17	44	7	50	59	1.65738	-0.236292	0.598831	Tetratricopeptide repeat (TPR)-like superfamily protein
AT1G11905.1	90	100	104	26	172	196	3.42286	-0.0407648	1	B-cell receptor-associated protein 31-like
AT1G11905.2	47	56	50	11	93	94	2.45754	-0.0998169	0.833223	B-cell receptor-associated protein 31-like
AT1G11910.1	4351	4735	4948	1291	8036	10256	8.8805	0.00436482	1	aspartic proteinase A1
AT1G11915.1	8	10	10	2	14	21	0.259196	-0.0644245	1	unknown protein
AT1G11920.1	0	1	1	0	0	0	-2.26069	-2.87463	0.771714	Pectin lyase-like superfamily protein
AT1G11925.1	0	0	0	0	0	0	-2.69866	5.12548e-15	1	Stigma-specific Stig1 family protein
AT1G11930.1	403	418	510	87	608	761	5.50506	-0.345466	0.000378414	Predicted pyridoxal phosphate-dependent enzyme, YBL036C type
AT1G11930.2	454	491	556	92	690	856	5.68962	-0.357042	9.79654e-05	Predicted pyridoxal phosphate-dependent enzyme, YBL036C type
AT1G11940.1	54	65	60	15	84	114	2.69585	-0.212618	0.472361	Core-2/I-branching beta-1,6-N-acetylglucosaminyltransferase family protein
AT1G11950.1	67	66	73	8	118	119	2.86779	-0.230694	0.208776	Transcription factor jumonji (jmjC) domain-containing protein
AT1G11960.1	102	111	97	26	206	231	3.51861	0.105377	0.847712	ERD (early-responsive to dehydration stress) family protein
AT1G11990.1	4	4	1	1	11	4	-1.52298	0.370425	0.931998	O-fucosyltransferase family protein
AT1G12000.1	1128	1254	1206	372	2652	3488	7.27271	0.340027	0.0022223	Phosphofructokinase family protein
AT1G12010.1	138	125	138	24	219	292	3.14971	-0.117371	0.674104	2-oxoglutarate (2OG) and Fe(II)-dependent oxygenase superfamily protein
AT1G12020.1	52	58	72	21	116	126	3.18183	0.0741877	0.788792	unknown protein
AT1G12030.1	9	5	6	0	21	18	0.510954	0.454962	0.99149	Protein of unknown function (DUF506)
AT1G12040.1	30	46	32	38	132	233	2.63969	1.50951	3.57808e-06	leucine-rich repeat/extensin 1
AT1G12050.1	398	402	478	110	710	853	5.60708	-0.0759108	0.564657	fumarylacetoacetase, putative
AT1G12060.1	21	28	38	11	46	59	1.71548	-0.0323389	1	BCL-2-associated athanogene 5
AT1G12064.1	0	0	0	0	2	3	-1.96643	3.63455	0.505092	unknown protein
AT1G12070.1	0	1	4	0	4	4	-1.28648	0.198719	1	Immunoglobulin E-set superfamily protein
AT1G12080.1	177	154	174	68	545	728	4.82853	0.869696	3.90864e-06	Vacuolar calcium-binding protein-related
AT1G12080.2	297	252	295	112	855	1192	5.49211	0.80574	1.37789e-05	Vacuolar calcium-binding protein-related
AT1G12090.1	2703	3456	3849	1330	6067	7311	9.00407	0.220422	0.110086	extensin-like protein
AT1G12100.1	4	5	1	0	6	7	-0.820604	-0.124879	0.900732	Bifunctional inhibitor/lipid-transfer protein/seed storage 2S albumin superfamily protein
AT1G12110.1	1591	1916	1670	663	3775	5028	7.45431	0.410764	0.0878285	nitrate transporter 1.1
AT1G12120.1	405	455	463	109	740	878	5.58896	-0.0845977	0.463753	Plant protein of unknown function (DUF863)
AT1G12130.1	8	9	3	0	14	10	-0.838151	-0.232243	0.71678	Flavin-binding monooxygenase family protein
AT1G12140.1	397	352	431	128	733	959	5.47737	0.163002	0.187934	flavin-monooxygenase glucosinolate S-oxygenase 5
AT1G12140.2	382	334	411	119	693	904	5.4029	0.142308	0.31049	flavin-monooxygenase glucosinolate S-oxygenase 5
AT1G12150.1	13	13	6	6	38	56	0.947692	1.15424	0.00874848	Plant protein of unknown function (DUF827)
AT1G12160.1	42	49	43	18	123	151	2.50381	0.639251	0.0680689	Flavin-binding monooxygenase family protein
AT1G12190.1	0	0	0	0	0	1	-2.72223	1.71148	1	F-box and associated interaction domains-containing protein
AT1G12200.1	211	304	234	121	643	829	4.91507	0.649574	4.19277e-05	Flavin-binding monooxygenase family protein
AT1G12210.1	31	29	39	6	51	62	1.82319	-0.204562	0.622012	RPS5-like 1
AT1G12211.1	0	0	0	0	0	0	-2.72213	5.12548e-15	1	unknown protein
AT1G12220.1	86	84	106	20	124	163	3.05134	-0.311869	0.141507	Disease resistance protein (CC-NBS-LRR class) family
AT1G12220.2	87	85	105	20	124	165	3.06613	-0.30854	0.13949	Disease resistance protein (CC-NBS-LRR class) family
AT1G12230.1	687	760	842	264	1451	1748	6.4624	0.158835	0.0805657	Aldolase superfamily protein
AT1G12230.2	661	732	818	251	1394	1676	6.41416	0.146741	0.119292	Aldolase superfamily protein
AT1G12240.1	1401	1354	1554	458	2627	3294	7.14858	0.114941	0.251646	Glycosyl hydrolases family 32 protein
AT1G12244.1	74	86	117	22	127	186	3.30636	-0.191932	0.538498	Polynucleotidyl transferase, ribonuclease H-like superfamily protein
AT1G12250.1	456	477	560	90	566	718	5.46597	-0.587599	2.66077e-08	Pentapeptide repeat-containing protein
AT1G12250.2	432	457	534	83	535	679	5.40044	-0.603976	8.57294e-09	Pentapeptide repeat-containing protein
AT1G12260.1	47	39	63	6	77	94	2.14038	-0.255259	0.378096	NAC 007
AT1G12270.1	432	524	513	127	897	1147	5.95525	0.0779051	0.731423	stress-inducible protein, putative
AT1G12280.1	118	120	160	24	160	199	3.43418	-0.519043	0.000528007	LRR and NB-ARC domains-containing disease resistance protein
AT1G12290.1	50	39	48	12	74	98	2.17741	-0.0426974	1	Disease resistance protein (CC-NBS-LRR class) family
AT1G12290.2	52	39	49	12	74	101	2.24974	-0.0525344	0.998886	Disease resistance protein (CC-NBS-LRR class) family
AT1G12294.1	1	0	1	0	1	1	-2.40483	-0.393541	1	MIR472a; miRNA
AT1G12300.1	70	65	74	23	95	123	2.88669	-0.246708	0.502809	Tetratricopeptide repeat (TPR)-like superfamily protein
AT1G12310.1	547	569	587	136	1100	1300	6.11964	0.0739306	0.808486	Calcium-binding EF-hand family protein
AT1G12320.1	102	87	109	15	104	135	3.35774	-0.698049	3.05338e-05	Protein of unknown function (DUF1442)
AT1G12330.1	166	198	203	57	222	286	4.48313	-0.439251	0.00853766	unknown protein
AT1G12340.1	45	39	45	14	81	105	2.3893	0.16906	0.623497	Cornichon family protein
AT1G12350.1	132	153	179	40	279	332	4.09692	0.0235696	1	4-phospho-panto-thenoylcysteine synthetase
AT1G12360.1	579	540	585	153	967	1252	5.83742	-0.00186804	1	Sec1/munc18-like (SM) proteins superfamily
AT1G12370.1	113	139	119	25	187	237	3.71796	-0.201802	0.254185	photolyase 1
AT1G12370.2	122	161	128	28	201	259	3.83862	-0.230369	0.181997	photolyase 1
AT1G12380.1	127	153	162	39	221	259	3.90775	-0.226254	0.193309	unknown protein
AT1G12390.1	114	101	123	32	200	251	3.66644	0.050799	0.951069	Cornichon family protein
AT1G12400.1	43	42	53	15	94	120	2.47555	0.266805	0.310483	Nucleotide excision repair, TFIIH, subunit TTDA
AT1G12410.1	1098	1160	1443	304	2089	2480	7.11499	-0.0781786	0.446274	CLP protease proteolytic subunit 2
AT1G12420.1	105	120	117	22	143	195	3.45547	-0.396537	0.0175451	ACT domain repeat 8
AT1G12430.1	271	278	321	73	392	523	4.9013	-0.27276	0.0569687	armadillo repeat kinesin 3
AT1G12430.2	270	272	314	71	381	512	4.86425	-0.286171	0.0407179	armadillo repeat kinesin 3
AT1G12440.1	448	467	486	109	821	875	5.63247	-0.108698	0.368012	A20/AN1-like zinc finger family protein
AT1G12440.2	425	442	450	95	763	822	5.53615	-0.131422	0.2388	A20/AN1-like zinc finger family protein
AT1G12450.1	60	59	66	16	116	155	2.66879	0.146664	0.829021	SNARE associated Golgi protein family
AT1G12460.1	172	177	224	31	294	316	4.31016	-0.314519	0.0121912	Leucine-rich repeat protein kinase family protein
AT1G12470.1	455	521	504	115	822	985	5.64914	-0.104357	0.385306	zinc ion binding
AT1G12480.1	41	44	27	11	50	60	2.05723	-0.33909	0.466082	C4-dicarboxylate transporter/malic acid transport protein
AT1G12490.1	0	1	3	0	0	1	-2.40486	-2.05062	0.325375	F-box associated ubiquitination effector family protein
AT1G12500.1	342	396	455	125	827	1054	5.60499	0.273471	0.0278497	Nucleotide-sugar transporter family protein
AT1G12520.1	168	188	191	46	271	323	4.20413	-0.234474	0.0838655	copper chaperone for SOD1
AT1G12520.2	174	193	198	46	279	324	4.23979	-0.260907	0.0410117	copper chaperone for SOD1
AT1G12520.3	159	177	173	42	252	300	4.10242	-0.238767	0.0899197	copper chaperone for SOD1
AT1G12530.1	125	129	135	25	221	287	3.81959	-0.0310543	0.807198	unknown protein
AT1G12540.1	0	0	0	0	0	0	-2.72216	5.12548e-15	1	basic helix-loop-helix (bHLH) DNA-binding superfamily protein
AT1G12550.1	46	43	62	12	90	105	2.45598	-0.010349	1	D-isomer specific 2-hydroxyacid dehydrogenase family protein
AT1G12560.1	62	66	41	56	213	308	3.20338	1.3943	5.56659e-07	expansin A7
AT1G12570.1	75	73	84	19	85	106	3.14796	-0.587986	0.0191795	Glucose-methanol-choline (GMC) oxidoreductase family protein
AT1G12580.1	279	335	347	90	605	708	5.19625	0.0789653	0.716977	phosphoenolpyruvate carboxylase-related kinase 1
AT1G12600.1	4	10	6	2	7	10	-0.559374	-0.521147	0.780594	UDP-N-acetylglucosamine (UAA) transporter family
AT1G12610.1	0	0	0	0	0	0	-2.65286	5.12548e-15	1	Integrase-type DNA-binding superfamily protein
AT1G12620.1	58	68	79	15	110	131	2.92239	-0.143745	0.582499	Pentatricopeptide repeat (PPR) superfamily protein
AT1G12630.1	1	0	3	0	2	7	-1.21907	0.657819	1	Integrase-type DNA-binding superfamily protein
AT1G12640.1	326	351	374	113	648	770	5.0645	0.0937832	0.560749	MBOAT (membrane bound O-acyl transferase) family protein
AT1G12650.1	188	196	209	41	319	369	4.55353	-0.180414	0.243175	unknown protein
AT1G12650.2	194	205	217	41	332	381	4.6008	-0.189678	0.200619	unknown protein
AT1G12650.3	190	195	210	41	319	369	4.55637	-0.18547	0.229241	unknown protein
AT1G12650.4	174	176	187	35	291	335	4.37717	-0.184471	0.24184	unknown protein
AT1G12663.1	0	0	0	0	0	0	-2.72215	5.12548e-15	1	unknown protein
AT1G12665.1	0	0	0	0	0	0	-2.72214	5.12548e-15	1	unknown protein
AT1G12670.1	0	1	0	0	0	0	-2.58679	-2.06071	1	pseudogene
AT1G12672.1	1	2	0	1	4	2	-2.12937	0.769236	0.821315	unknown protein
AT1G12672.2	1	2	0	1	4	2	-2.00906	0.765447	0.81895	unknown protein
AT1G12680.1	184	184	219	49	302	383	4.40397	-0.141632	0.35225	phosphoenolpyruvate carboxylase-related kinase 2
AT1G12700.1	34	41	39	7	61	80	2.3387	-0.0999321	0.773468	ATP binding;nucleic acid binding;helicases
AT1G12710.1	39	52	53	16	89	94	2.34724	0.0201439	1	phloem protein 2-A12
AT1G12730.1	49	52	43	15	76	111	2.64473	0.0222415	1	GPI transamidase subunit PIG-U
AT1G12730.2	46	49	43	12	73	106	2.57058	-0.00611216	1	GPI transamidase subunit PIG-U
AT1G12740.1	58	67	79	29	257	322	3.16688	1.02459	0.00394559	cytochrome P450, family 87, subfamily A, polypeptide 2
AT1G12740.2	55	65	79	26	250	302	3.11068	0.981836	0.00538482	cytochrome P450, family 87, subfamily A, polypeptide 2
AT1G12750.1	130	143	195	28	225	244	4.30532	-0.380108	0.0163456	RHOMBOID-like protein 6
AT1G12750.2	149	158	207	29	239	265	4.41075	-0.417369	0.00294939	RHOMBOID-like protein 6
AT1G12750.3	154	163	214	29	252	273	4.44791	-0.410829	0.0031027	RHOMBOID-like protein 6
AT1G12760.1	427	429	471	105	759	962	5.51156	-0.0229997	0.847712	Zinc finger, C3HC4 type (RING finger) family protein
AT1G12760.2	404	413	434	98	722	917	5.4409	-0.0127446	0.911311	Zinc finger, C3HC4 type (RING finger) family protein
AT1G12770.1	378	434	485	142	857	942	5.763	0.138614	0.287241	P-loop containing nucleoside triphosphate hydrolases superfamily protein
AT1G12775.1	45	39	44	10	67	83	2.27994	-0.143963	0.716348	Pentatricopeptide repeat (PPR) superfamily protein
AT1G12780.1	353	377	400	65	519	588	5.16027	-0.437574	0.000679159	UDP-D-glucose/UDP-D-galactose 4-epimerase 1
AT1G12790.1	27	30	26	7	45	43	1.60116	-0.260887	0.617179	unknown protein
AT1G12800.1	2483	2707	3147	638	3903	4762	8.21187	-0.298634	0.000401488	Nucleic acid-binding, OB-fold-like protein
AT1G12805.1	7	5	1	3	22	6	-0.135009	0.885674	0.617187	nucleotide binding
AT1G12810.1	131	144	148	52	240	292	3.99331	0.0218369	0.864142	proline-rich family protein
AT1G12810.2	110	128	125	45	219	255	3.76477	0.0718481	0.689835	proline-rich family protein
AT1G12820.1	506	502	573	143	906	1067	5.71282	-0.0419846	0.822444	auxin signaling F-box 3
AT1G12830.1	118	162	165	25	306	298	4.14846	0.00233569	0.955295	unknown protein
AT1G12840.1	1385	1399	1597	425	2763	3345	7.3695	0.104225	0.268164	vacuolar ATP synthase subunit C (VATC) / V-ATPase C subunit / vacuolar proton pump C subunit (DET3)
AT1G12845.1	36	57	60	27	94	96	3.34796	0.129964	0.582499	unknown protein
AT1G12850.1	317	306	378	102	600	771	5.30449	0.0951587	0.5074	Phosphoglycerate mutase family protein
AT1G12855.1	1	4	3	0	1	1	-1.6751	-2.235	0.145754	F-box family protein
AT1G12860.1	292	332	372	79	531	601	5.30826	-0.180405	0.177963	basic helix-loop-helix (bHLH) DNA-binding superfamily protein
AT1G12870.1	0	1	0	0	1	0	-2.67549	-0.335438	1	F-box and associated interaction domains-containing protein
AT1G12880.1	72	72	103	13	121	180	3.14342	-0.144417	0.46209	nudix hydrolase homolog 12
AT1G12890.1	1	1	0	0	2	1	-1.84555	0.103102	1	Integrase-type DNA-binding superfamily protein
AT1G12900.1	13795	14520	17198	4465	26673	31818	10.6108	0.0263927	0.928971	glyceraldehyde 3-phosphate dehydrogenase A subunit 2
AT1G12900.2	12923	13639	16181	4150	24979	29777	10.5222	0.0185269	0.991832	glyceraldehyde 3-phosphate dehydrogenase A subunit 2
AT1G12900.3	13242	13891	16520	4271	25402	30233	10.5506	0.017215	1	glyceraldehyde 3-phosphate dehydrogenase A subunit 2
AT1G12900.4	12275	12949	15429	3979	23921	28656	10.443	0.0314832	0.886651	glyceraldehyde 3-phosphate dehydrogenase A subunit 2
AT1G12910.1	192	170	200	59	334	438	4.44565	0.100911	0.556704	Transducin/WD40 repeat-like superfamily protein
AT1G12920.1	688	729	842	172	1514	1951	6.59079	0.154425	0.31471	eukaryotic release factor 1-2
AT1G12930.1	237	253	283	54	394	460	4.71446	-0.23457	0.0240663	ARM repeat superfamily protein
AT1G12940.1	0	1	1	0	1	3	-2.14543	0.465497	1	nitrate transporter2.5
AT1G12950.1	31	34	29	12	85	121	2.0055	0.703397	0.09044	root hair specific 2
AT1G12960.1	1	0	0	0	0	0	-2.72201	-2.06494	1	Ribosomal protein L18e/L15 superfamily protein
AT1G12970.1	79	64	58	26	137	162	2.81479	0.235262	0.300978	plant intracellular ras group-related LRR 3
AT1G12980.1	0	0	0	0	0	0	-1.95223	5.12548e-15	1	Integrase-type DNA-binding superfamily protein
AT1G12990.1	141	145	192	35	291	343	4.38745	0.00979766	1	beta-1,4-N-acetylglucosaminyltransferase family protein
AT1G13000.1	128	127	165	36	241	319	3.97025	0.03508	1	Protein of unknown function (DUF707)
AT1G13000.2	134	132	171	39	246	322	3.99815	0.00833468	1	Protein of unknown function (DUF707)
AT1G13020.1	381	396	437	86	690	861	5.4755	-0.0573792	0.546661	eukaryotic initiation factor 4B2
AT1G13030.1	101	114	110	23	185	248	3.9648	0.00932087	1	sphere organelles protein-related
AT1G13040.1	28	26	37	2	50	67	1.98904	-0.110941	0.611403	Pentatricopeptide repeat (PPR-like) superfamily protein
AT1G13050.1	22	26	34	11	57	65	2.08684	0.239197	0.470346	unknown protein
AT1G13050.2	22	24	32	11	57	66	2.07207	0.322002	0.29995	unknown protein
AT1G13060.1	857	916	1005	236	1659	2022	6.72637	0.0114309	1	20S proteasome beta subunit E1
AT1G13060.2	789	844	932	220	1547	1873	6.62296	0.0224123	1	20S proteasome beta subunit E1
AT1G13070.1	0	1	0	0	0	1	-2.54439	-0.344285	1	CYP71B27 (cytochrome P450	family 71	subfamily B	polypeptide 27")"
AT1G13080.1	339	385	400	112	667	871	5.14916	0.0879096	0.629387	cytochrome P450, family 71, subfamily B, polypeptide 2
AT1G13080.2	318	353	383	103	628	822	5.0461	0.0902088	0.650429	cytochrome P450, family 71, subfamily B, polypeptide 2
AT1G13090.1	468	532	588	110	687	868	5.63277	-0.397851	6.68812e-05	cytochrome P450, family 71, subfamily B, polypeptide 28
AT1G13100.1	77	78	75	28	161	181	3.03128	0.234054	0.371029	cytochrome P450, family 71, subfamily B, polypeptide 29
AT1G13110.1	577	515	611	171	1067	1406	6.10419	0.155925	0.249757	cytochrome P450, family 71 subfamily B, polypeptide 7
AT1G13120.1	203	229	250	44	372	472	4.6948	-0.106815	0.39648	embryo defective 1745
AT1G13130.1	38	33	51	4	51	80	1.9766	-0.406808	0.341099	Cellulase (glycosyl hydrolase family 5) protein
AT1G13140.1	11	7	9	3	10	10	0.0789097	-0.655442	0.630458	cytochrome P450, family 86, subfamily C, polypeptide 3
AT1G13140.2	9	7	8	3	8	9	-0.00157918	-0.675462	0.682211	cytochrome P450, family 86, subfamily C, polypeptide 3
AT1G13145.1	16	22	22	2	33	35	1.42612	-0.251407	0.543799	pseudogene
AT1G13150.1	9	13	16	0	10	15	0.500827	-1.0756	0.0125367	cytochrome P450, family 86, subfamily C, polypeptide 4
AT1G13160.1	352	329	363	92	788	917	5.62113	0.279701	0.0447545	ARM repeat superfamily protein
AT1G13170.1	259	271	294	70	487	665	4.99233	0.0837714	0.792981	OSBP(oxysterol binding protein)-related protein 1D
AT1G13170.2	253	266	291	68	482	658	4.96078	0.0912724	0.761809	OSBP(oxysterol binding protein)-related protein 1D
AT1G13180.1	103	83	96	32	184	215	3.42211	0.151681	0.446054	Actin-like ATPase superfamily protein
AT1G13190.1	269	309	332	58	506	613	4.96121	-0.118856	0.273093	RNA-binding (RRM/RBD/RNP motifs) family protein
AT1G13195.1	70	84	85	22	139	191	3.01638	0.089572	0.878312	RING/U-box superfamily protein
AT1G13195.2	63	78	76	21	131	179	2.9094	0.139786	0.692375	RING/U-box superfamily protein
AT1G13200.1	0	0	0	0	2	0	-2.46305	2.48952	1	F-box and associated interaction domains-containing protein
AT1G13210.1	234	264	244	88	491	628	4.62236	0.250315	0.254406	autoinhibited Ca2+/ATPase II
AT1G13220.1	73	70	123	10	99	129	3.18403	-0.63934	0.000734618	nuclear matrix constituent protein-related
AT1G13220.2	270	270	338	41	385	465	5.00552	-0.466105	6.65347e-06	nuclear matrix constituent protein-related
AT1G13230.1	3	1	6	0	5	4	-0.931884	-0.596179	0.585867	Leucine-rich repeat (LRR) family protein
AT1G13245.1	308	281	350	73	673	808	5.07212	0.186116	0.501604	ROTUNDIFOLIA like 17
AT1G13250.1	128	149	150	36	242	304	4.29857	-0.0218171	0.983298	galacturonosyltransferase-like 3
AT1G13260.1	83	65	102	49	644	891	3.97539	1.98968	1.4007e-10	related to ABI3/VP1 1
AT1G13270.1	139	172	215	41	331	387	4.71245	0.0434899	1	methionine aminopeptidase 1B
AT1G13270.2	126	153	198	39	293	347	4.55819	0.0344471	1	methionine aminopeptidase 1B
AT1G13280.1	294	246	285	103	519	582	4.99323	0.123615	0.424986	allene oxide cyclase 4
AT1G13290.1	0	0	2	0	0	0	-2.2779	-2.87187	0.771714	C2H2-like zinc finger protein
AT1G13300.1	134	126	104	382	2203	3154	5.60036	3.49018	5.18448e-110	myb-like transcription factor family protein
AT1G13310.1	10	14	6	2	12	23	-0.0867919	-0.205823	0.927157	Endosomal targeting BRO1-like domain-containing protein
AT1G13320.1	543	567	645	175	1099	1225	6.00498	0.0550001	0.670803	protein phosphatase 2A subunit A3
AT1G13320.2	512	531	613	165	1027	1154	5.92067	0.0479118	0.736889	protein phosphatase 2A subunit A3
AT1G13320.3	531	561	638	173	1079	1200	5.97845	0.0494677	0.709863	protein phosphatase 2A subunit A3
AT1G13330.1	22	22	27	3	46	39	1.67978	-0.154967	0.722966	Arabidopsis Hop2 homolog
AT1G13340.1	59	62	62	18	122	126	2.47701	0.0806561	0.94282	Regulator of Vps4 activity in the MVB pathway protein
AT1G13350.1	336	379	406	69	476	598	5.25192	-0.442711	1.27068e-06	Protein kinase superfamily protein
AT1G13350.2	340	381	409	69	479	599	5.25998	-0.449606	9.09984e-07	Protein kinase superfamily protein
AT1G13360.1	494	490	567	154	779	995	5.94956	-0.124982	0.461397	unknown protein
AT1G13360.2	345	339	391	114	584	734	5.45721	-0.0298158	1	unknown protein
AT1G13360.3	345	339	391	114	584	733	5.45646	-0.0307878	1	unknown protein
AT1G13370.1	4	4	3	0	6	7	-1.09788	-0.222672	0.760948	Histone superfamily protein
AT1G13380.1	145	198	216	49	337	347	4.49665	-0.0629916	0.867297	Protein of unknown function (DUF1218)
AT1G13390.1	65	67	81	19	115	155	3.23174	-0.0241351	1	unknown protein
AT1G13390.2	99	88	120	25	151	211	3.63993	-0.134744	0.610372	unknown protein
AT1G13400.1	1	1	0	0	0	3	-1.28667	0.0983352	1	C2H2 and C2HC zinc fingers superfamily protein
AT1G13410.1	14	14	13	4	36	43	1.19232	0.546051	0.273786	Tetratricopeptide repeat (TPR)-like superfamily protein
AT1G13420.1	63	64	60	32	156	240	2.9637	0.743994	0.14262	sulfotransferase 4B
AT1G13430.1	20	21	21	7	33	57	1.28266	0.177476	0.783959	sulfotransferase 4C
AT1G13440.1	12394	12775	14643	4748	25894	30462	10.727	0.212728	0.0110814	glyceraldehyde-3-phosphate dehydrogenase C2
AT1G13440.2	10788	11046	12633	4037	22079	25908	10.5236	0.187393	0.031143	glyceraldehyde-3-phosphate dehydrogenase C2
AT1G13450.1	199	229	204	57	338	400	4.40385	-0.128581	0.521069	Homeodomain-like superfamily protein
AT1G13450.2	186	205	189	54	303	355	4.26646	-0.160323	0.400183	Homeodomain-like superfamily protein
AT1G13450.3	199	220	196	60	332	390	4.36993	-0.107713	0.67309	Homeodomain-like superfamily protein
AT1G13460.1	220	205	225	54	322	398	4.39977	-0.211291	0.142988	Protein phosphatase 2A regulatory B subunit family protein
AT1G13460.2	223	206	232	54	330	412	4.40472	-0.196768	0.154024	Protein phosphatase 2A regulatory B subunit family protein
AT1G13470.1	3	1	5	0	3	1	-1.80701	-1.53014	0.231286	Protein of unknown function (DUF1262)
AT1G13480.1	17	22	14	4	15	30	0.531117	-0.579119	0.355585	Protein of unknown function (DUF1262)
AT1G13490.1	1	2	4	0	1	1	-1.88427	-2.04858	0.220556	Protein of unknown function (DUF1262)
AT1G13500.1	9	6	5	2	19	14	-0.308091	0.340186	0.767267	Protein of unknown function (DUF1262)
AT1G13510.1	36	38	22	8	58	82	1.48156	0.0861331	1	Protein of unknown function (DUF1262)
AT1G13520.1	72	110	66	19	173	262	3.12028	0.257875	0.802623	Protein of unknown function (DUF1262)
AT1G13530.1	37	47	18	5	42	62	1.31105	-0.461089	0.493996	Protein of unknown function (DUF1262)
AT1G13540.1	16	14	18	2	17	28	0.174812	-0.501772	0.305154	Protein of unknown function (DUF1262)
AT1G13550.1	7	13	7	2	16	20	-0.344278	0.018951	1	Protein of unknown function (DUF1262)
AT1G13560.1	595	626	683	148	1044	1328	6.2005	-0.0766826	0.387393	aminoalcoholphosphotransferase 1
AT1G13560.2	558	593	639	134	973	1225	6.1156	-0.101202	0.24453	aminoalcoholphosphotransferase 1
AT1G13570.1	123	108	121	32	198	220	3.74474	-0.105245	0.729329	F-box/RNI-like superfamily protein
AT1G13580.1	97	93	107	20	180	225	3.39936	0.0315131	1	LAG1 longevity assurance homolog 3
AT1G13580.2	104	105	115	23	193	241	3.49338	0.0164241	1	LAG1 longevity assurance homolog 3
AT1G13580.3	104	108	116	23	195	241	3.50066	0.00565491	1	LAG1 longevity assurance homolog 3
AT1G13590.1	22	36	24	3	98	101	1.79037	0.707194	0.175021	phytosulfokine 1 precursor
AT1G13600.1	27	27	19	6	38	61	1.3993	0.0479452	1	basic leucine-zipper 58
AT1G13605.1	0	0	0	0	0	0	-2.5444	5.12548e-15	1	unknown protein
AT1G13607.1	0	0	0	0	0	0	-2.6756	5.12548e-15	1	Defensin-like (DEFL) family protein
AT1G13608.1	0	0	0	0	1	0	-2.40502	1.72459	1	Defensin-like (DEFL) family protein
AT1G13609.1	2	1	5	0	5	5	1.03625	-0.157308	1	Defensin-like (DEFL) family protein
AT1G13609.2	1	2	4	0	4	3	0.514007	-0.441815	0.819723	Defensin-like (DEFL) family protein
AT1G13610.1	6	10	6	2	9	15	-0.321712	-0.220142	0.979934	alpha/beta-Hydrolases superfamily protein
AT1G13610.2	5	10	6	2	8	14	-0.380984	-0.266049	0.977914	alpha/beta-Hydrolases superfamily protein
AT1G13620.1	3	7	7	3	9	16	-0.39829	0.26297	0.807227	unknown protein
AT1G13630.1	24	14	18	4	35	36	1.28113	-0.0444355	0.99294	Tetratricopeptide repeat (TPR)-like superfamily protein
AT1G13630.2	25	16	21	5	39	42	1.43238	0.00785021	1	Tetratricopeptide repeat (TPR)-like superfamily protein
AT1G13635.1	23	20	23	2	40	56	1.21267	0.0648772	1	DNA glycosylase superfamily protein
AT1G13635.2	24	20	25	2	41	56	1.26888	0.0100036	0.983152	DNA glycosylase superfamily protein
AT1G13640.1	257	229	293	76	498	644	4.93584	0.168807	0.317157	Phosphatidylinositol 3- and 4-kinase family protein
AT1G13650.1	481	636	607	114	765	878	5.53033	-0.443599	0.023159	unknown protein
AT1G13650.2	499	650	624	117	801	925	5.56916	-0.421983	0.0318491	unknown protein
AT1G13670.1	75	68	86	21	162	230	3.09491	0.364274	0.128735	unknown protein
AT1G13680.1	1	0	1	0	1	0	-2.05323	-1.15155	1	PLC-like phosphodiesterases superfamily protein
AT1G13690.1	134	131	169	31	263	295	4.36223	-0.0303964	0.866874	ATPase E1
AT1G13700.1	19	22	29	9	49	53	1.46199	0.237928	0.745606	6-phosphogluconolactonase 1
AT1G13710.1	51	65	59	12	88	76	2.90047	-0.443823	0.131538	cytochrome P450, family 78, subfamily A, polypeptide 5
AT1G13730.1	367	388	387	104	752	904	5.69327	0.143455	0.335444	Nuclear transport factor 2 (NTF2) family protein with RNA binding (RRM-RBD-RNP motifs) domain
AT1G13740.1	76	83	64	9	98	138	3.20328	-0.360967	0.0581403	ABI five binding protein 2
AT1G13750.1	82	93	67	28	154	240	2.99266	0.314726	0.333635	Purple acid phosphatases superfamily protein
AT1G13770.1	117	118	117	23	174	211	3.72618	-0.260087	0.126762	Protein of unknown function, DUF647
AT1G13770.2	116	118	112	23	170	214	3.69729	-0.240891	0.162718	Protein of unknown function, DUF647
AT1G13780.1	56	58	56	11	85	110	2.65333	-0.188649	0.395437	F-box/RNI-like/FBD-like domains-containing protein
AT1G13790.1	51	40	54	8	75	87	2.75271	-0.237419	0.321951	XH/XS domain-containing protein
AT1G13800.1	7	9	10	2	27	22	0.792574	0.501016	0.538799	Tetratricopeptide repeat (TPR)-like superfamily protein
AT1G13810.1	82	65	82	16	107	128	3.19471	-0.332009	0.110585	Restriction endonuclease, type II-like superfamily protein
AT1G13820.1	449	487	565	138	792	896	5.80644	-0.156628	0.299492	alpha/beta-Hydrolases superfamily protein
AT1G13830.1	34	24	30	10	58	88	1.63472	0.336835	0.584534	Carbohydrate-binding X8 domain superfamily protein
AT1G13860.1	162	155	194	38	302	371	4.37223	0.00320026	1	QUASIMODO2 LIKE 1
AT1G13860.2	155	147	181	37	277	352	4.2884	-0.00752154	0.971692	QUASIMODO2 LIKE 1
AT1G13860.3	168	158	196	38	306	379	4.40657	-0.00596149	0.955757	QUASIMODO2 LIKE 1
AT1G13860.4	162	157	195	37	306	371	4.37494	-0.000151284	0.966497	QUASIMODO2 LIKE 1
AT1G13870.1	110	106	122	20	200	286	3.85785	0.088834	1	calmodulin binding;purine nucleotide binding
AT1G13880.1	193	228	246	39	312	366	4.38587	-0.369736	0.00200626	ELM2 domain-containing protein
AT1G13890.1	0	0	1	0	0	0	-2.6986	-2.05648	1	soluble N-ethylmaleimide-sensitive factor adaptor protein 30
AT1G13900.1	231	258	263	77	463	579	4.8299	0.110296	0.488054	Purple acid phosphatases superfamily protein
AT1G13910.1	80	80	101	21	108	110	3.05941	-0.568608	0.0120964	Leucine-rich repeat (LRR) family protein
AT1G13920.1	28	38	49	17	51	71	2.31032	-0.157888	1	Remorin family protein
AT1G13930.1	3017	3174	3661	701	3884	4926	9.27417	-0.484511	1.06627e-05	unknown protein
AT1G13930.2	3001	3163	3643	699	3865	4904	9.26581	-0.483858	1.09559e-05	unknown protein
AT1G13930.3	3002	3163	3644	700	3865	4906	9.26615	-0.483297	1.13005e-05	unknown protein
AT1G13940.1	211	210	251	52	354	411	4.4223	-0.182507	0.163559	Plant protein of unknown function (DUF863)
AT1G13950.1	76	75	67	27	183	197	3.20771	0.435326	0.0497747	eukaryotic elongation factor 5A-1
AT1G13960.1	195	213	185	50	340	421	4.29763	-0.0312061	0.971148	WRKY DNA-binding protein 4
AT1G13960.2	180	202	168	46	319	369	4.17865	-0.0621794	0.870043	WRKY DNA-binding protein 4
AT1G13970.1	54	77	74	24	163	172	2.80503	0.351899	0.279776	Protein of unknown function (DUF1336)
AT1G13980.1	409	420	461	149	740	1011	5.5597	0.116247	0.379098	sec7 domain-containing protein
AT1G13980.2	409	412	456	146	741	1005	5.54913	0.1216	0.362012	sec7 domain-containing protein
AT1G13990.1	155	205	244	30	150	290	3.885	-0.844244	1.15476e-05	unknown protein
AT1G13990.2	139	188	222	29	135	260	3.74875	-0.844337	2.89173e-05	unknown protein
AT1G13990.3	120	155	196	28	116	215	3.52058	-0.841909	0.000101967	unknown protein
AT1G14000.1	625	682	775	163	1034	1370	6.11719	-0.172807	0.0734444	VH1-interacting kinase
AT1G14010.1	177	207	217	63	396	455	4.56287	0.145632	0.34195	emp24/gp25L/p24 family/GOLD family protein
AT1G14020.1	167	182	204	45	366	415	4.45861	0.10735	0.707592	O-fucosyltransferase family protein
AT1G14030.1	286	339	418	77	512	602	5.32112	-0.271169	0.0656452	Rubisco methyltransferase family protein
AT1G14040.1	81	110	83	34	203	279	3.45092	0.435835	0.078294	EXS (ERD1/XPR1/SYG1) family protein
AT1G14060.1	111	123	141	35	230	360	4.15138	0.237739	0.389773	GCK domain-containing protein
AT1G14070.1	55	70	37	16	119	120	2.73494	0.179999	0.735838	fucosyltransferase 7
AT1G14080.1	47	65	53	17	128	190	2.56307	0.505213	0.134965	fucosyltransferase 6
AT1G14090.1	41	58	62	7	74	89	2.67653	-0.395162	0.0897437	pseudogene
AT1G14100.1	1	1	0	1	2	2	-2.00897	0.784469	0.736687	fucosyltransferase 8
AT1G14110.1	0	0	0	0	0	0	-2.72214	5.12548e-15	1	fucosyltransferase 9
AT1G14120.1	249	275	259	79	420	596	4.82442	0.0265113	1	2-oxoglutarate (2OG) and Fe(II)-dependent oxygenase superfamily protein
AT1G14130.1	105	127	108	27	164	220	3.44931	-0.199435	0.452563	2-oxoglutarate (2OG) and Fe(II)-dependent oxygenase superfamily protein
AT1G14140.1	104	97	113	24	173	192	3.6634	-0.157382	0.484558	Mitochondrial substrate carrier family protein
AT1G14150.1	715	755	851	167	1162	1382	6.41507	-0.253316	0.00647328	PsbQ-like 2
AT1G14150.2	526	562	641	141	897	1104	5.99709	-0.157782	0.168501	PsbQ-like 2
AT1G14160.1	48	48	36	17	118	117	2.30915	0.468179	0.180534	Uncharacterised protein family (UPF0497)
AT1G14170.1	116	119	99	27	246	367	3.70243	0.3863	0.169184	RNA-binding KH domain-containing protein
AT1G14170.2	112	117	96	26	240	357	3.6624	0.388928	0.162394	RNA-binding KH domain-containing protein
AT1G14170.3	123	124	103	28	256	381	3.75413	0.369662	0.197221	RNA-binding KH domain-containing protein
AT1G14180.1	71	67	72	11	131	141	3.19256	-0.043171	0.765536	RING/U-box superfamily protein
AT1G14180.2	71	66	70	10	125	139	3.14301	-0.0726167	0.656125	RING/U-box superfamily protein
AT1G14182.1	1	0	0	0	1	0	-2.54436	-0.337998	1	SCRL28 (SCR-like 28)
AT1G14185.1	29	40	25	7	65	81	1.86287	0.204705	0.834702	Glucose-methanol-choline (GMC) oxidoreductase family protein
AT1G14190.1	38	52	61	10	85	102	2.52114	-0.0859107	0.823683	Glucose-methanol-choline (GMC) oxidoreductase family protein
AT1G14200.1	50	64	63	13	138	180	2.6962	0.410667	0.14885	RING/U-box superfamily protein
AT1G14205.1	23	13	19	3	27	31	0.939266	-0.314684	0.538713	Ribosomal L18p/L5e family protein
AT1G14210.1	128	132	146	57	365	477	4.39202	0.671767	4.58614e-06	Ribonuclease T2 family protein
AT1G14220.1	15	24	12	4	63	56	1.10912	0.74882	0.16925	Ribonuclease T2 family protein
AT1G14225.1	0	0	0	0	0	0	-2.65278	5.12548e-15	1	unknown protein
AT1G14230.1	222	252	259	59	413	478	4.54857	-0.09537	0.578413	GDA1/CD39 nucleoside phosphatase family protein
AT1G14240.1	130	147	168	55	344	481	4.03511	0.493168	0.130703	GDA1/CD39 nucleoside phosphatase family protein
AT1G14240.2	129	148	169	54	345	483	4.03847	0.487792	0.140497	GDA1/CD39 nucleoside phosphatase family protein
AT1G14240.3	124	138	157	52	323	449	3.95103	0.487935	0.133489	GDA1/CD39 nucleoside phosphatase family protein
AT1G14240.4	129	148	170	55	351	483	4.04857	0.500024	0.12201	GDA1/CD39 nucleoside phosphatase family protein
AT1G14250.1	200	103	103	15	186	139	4.14757	-0.8381	0.121373	GDA1/CD39 nucleoside phosphatase family protein
AT1G14260.1	3	10	4	1	23	27	0.453491	1.07565	0.142049	RING/FYVE/PHD zinc finger superfamily protein
AT1G14260.2	4	11	6	1	25	28	0.602567	0.868192	0.236284	RING/FYVE/PHD zinc finger superfamily protein
AT1G14270.1	419	452	514	139	774	906	5.76397	-0.0468897	0.951753	CAAX amino terminal protease family protein
AT1G14270.2	395	427	479	130	733	839	5.68237	-0.0533655	0.913828	CAAX amino terminal protease family protein
AT1G14270.3	404	436	489	130	749	853	5.70944	-0.0620209	0.83858	CAAX amino terminal protease family protein
AT1G14270.4	379	409	451	119	709	791	5.62365	-0.0614978	0.832028	CAAX amino terminal protease family protein
AT1G14280.1	440	437	540	56	557	693	5.38698	-0.636404	2.85444e-09	phytochrome kinase substrate 2
AT1G14290.1	159	182	195	68	442	570	4.47091	0.535831	0.000126536	sphingoid base hydroxylase 2
AT1G14300.1	104	115	125	33	239	276	3.98772	0.205957	0.280041	ARM repeat superfamily protein
AT1G14300.2	102	114	118	31	225	268	3.91567	0.182816	0.393458	ARM repeat superfamily protein
AT1G14310.1	74	87	95	32	167	187	3.39181	0.138963	0.450465	Haloacid dehalogenase-like hydrolase (HAD) superfamily protein
AT1G14315.1	0	0	0	0	0	0	-2.67563	5.12548e-15	1	F-box and associated interaction domains-containing protein
AT1G14315.2	0	0	0	0	0	0	-2.69867	5.12548e-15	1	F-box and associated interaction domains-containing protein
AT1G14320.1	4367	4653	4998	1192	10072	11507	9.27272	0.154439	0.136618	Ribosomal protein L16p/L10e family protein
AT1G14320.2	3025	3177	3346	808	6907	7959	8.75778	0.16739	0.122713	Ribosomal protein L16p/L10e family protein
AT1G14330.1	111	125	122	22	233	281	3.65288	0.0789066	1	Galactose oxidase/kelch repeat superfamily protein
AT1G14340.1	139	132	129	49	242	289	3.7546	0.0873856	0.63687	RNA-binding (RRM/RBD/RNP motifs) family protein
AT1G14345.1	769	788	1017	218	1372	1569	6.53628	-0.15595	0.239312	NAD(P)-linked oxidoreductase superfamily protein
AT1G14350.1	227	235	269	44	362	369	4.51776	-0.383738	0.000963164	Duplicated homeodomain-like superfamily protein
AT1G14350.2	230	235	270	44	364	369	4.51619	-0.388889	0.00108667	Duplicated homeodomain-like superfamily protein
AT1G14360.1	172	167	208	58	326	455	4.53874	0.152202	0.321229	UDP-galactose transporter 3
AT1G14370.1	63	68	76	22	143	191	2.73086	0.30577	0.301112	protein kinase 2A
AT1G14380.1	320	327	315	79	538	703	5.14859	-0.0273215	0.891842	IQ-domain 28
AT1G14380.2	285	280	279	73	484	625	4.97543	0.00894796	1	IQ-domain 28
AT1G14380.3	310	325	310	75	521	681	5.11228	-0.0506728	0.745926	IQ-domain 28
AT1G14390.1	28	32	22	14	80	99	1.83304	0.770713	0.0165818	Leucine-rich repeat protein kinase family protein
AT1G14400.1	1039	1066	1107	289	1817	2172	6.78149	-0.0528837	0.771733	ubiquitin carrier protein 1
AT1G14400.2	810	830	842	216	1387	1642	6.42651	-0.0825568	0.55148	ubiquitin carrier protein 1
AT1G14410.1	195	228	237	66	419	434	4.96847	0.0283488	0.972879	ssDNA-binding transcriptional regulator
AT1G14420.1	0	0	0	0	0	1	-2.36766	1.71446	1	Pectate lyase family protein
AT1G14430.1	52	50	55	20	109	132	2.80557	0.275365	0.270364	glyoxal oxidase-related protein
AT1G14440.1	101	117	128	34	212	206	4.24626	-0.0647027	0.964464	homeobox protein 31
AT1G14440.2	91	113	117	30	194	187	4.13727	-0.096254	0.812242	homeobox protein 31
AT1G14450.1	396	437	463	122	970	1120	5.786	0.282958	0.0109219	NADH dehydrogenase (ubiquinone)s
AT1G14455.1	5	9	1	2	5	13	-0.844851	-0.052596	1	unknown protein
AT1G14460.1	240	245	277	51	360	442	4.68736	-0.304965	0.0025692	AAA-type ATPase family protein
AT1G14470.1	8	16	14	3	15	19	0.755075	-0.493242	0.478179	Pentatricopeptide repeat (PPR) superfamily protein
AT1G14480.1	12	18	14	2	33	37	1.42957	0.231788	0.929915	Ankyrin repeat family protein
AT1G14480.2	10	10	11	2	27	31	1.20576	0.475417	0.576319	Ankyrin repeat family protein
AT1G14490.1	7	5	9	2	10	16	0.413732	-0.0486001	1	Predicted AT-hook DNA-binding family protein
AT1G14500.1	3	1	2	1	4	5	-1.79462	0.264645	0.999278	Ankyrin repeat family protein
AT1G14510.1	312	299	367	78	607	754	5.26721	0.0748998	0.841188	alfin-like 7
AT1G14520.1	19	22	24	4	35	32	1.37013	-0.333328	0.557465	myo-inositol oxygenase 1
AT1G14520.2	14	22	23	3	35	26	1.2742	-0.341191	0.508264	myo-inositol oxygenase 1
AT1G14530.1	47	43	56	9	93	108	2.39252	0.0519621	1	Protein of unknown function (DUF1084)
AT1G14530.2	57	53	67	12	104	125	2.63637	-0.023776	0.953218	Protein of unknown function (DUF1084)
AT1G14540.1	69	74	49	33	194	218	2.7616	0.763931	0.0897011	Peroxidase superfamily protein
AT1G14550.1	5	2	1	6	18	38	-0.131324	2.44831	8.83681e-06	Peroxidase superfamily protein
AT1G14560.1	150	156	172	39	249	286	4.019	-0.197399	0.208394	Mitochondrial substrate carrier family protein
AT1G14570.1	415	468	491	128	766	938	5.60171	-0.0452994	0.8307	UBX domain-containing protein
AT1G14570.2	404	460	474	122	731	876	5.55562	-0.0891386	0.508875	UBX domain-containing protein
AT1G14570.3	393	449	471	116	739	894	5.5424	-0.0503931	0.740085	UBX domain-containing protein
AT1G14570.4	379	439	450	110	699	830	5.48471	-0.0924486	0.450044	UBX domain-containing protein
AT1G14580.1	183	191	267	85	419	502	4.9234	0.220727	0.0853362	C2H2-like zinc finger protein
AT1G14580.2	177	185	263	85	415	499	4.90616	0.249125	0.0523241	C2H2-like zinc finger protein
AT1G14590.1	73	75	93	18	108	147	3.28175	-0.28301	0.130924	Nucleotide-diphospho-sugar transferase family protein
AT1G14600.1	20	30	37	9	65	57	1.65257	0.145368	0.847741	Homeodomain-like superfamily protein
AT1G14610.1	1321	1358	1420	338	2442	3061	7.32879	0.00600297	1	valyl-tRNA synthetase / valine--tRNA ligase (VALRS)
AT1G14620.1	169	180	171	55	396	461	4.59297	0.330063	0.061363	decoy
AT1G14620.2	151	164	148	49	359	410	4.42571	0.342359	0.0505786	decoy
AT1G14630.1	37	27	49	10	65	82	2.40751	0.00984614	1	unknown protein
AT1G14640.1	44	49	62	8	68	78	2.54946	-0.471627	0.0306536	SWAP (Suppressor-of-White-APricot)/surp domain-containing protein
AT1G14642.1	0	2	0	0	2	0	-2.27774	-0.384771	1	unknown protein
AT1G14650.1	531	623	691	156	1085	1257	6.1482	-0.0327434	0.844655	SWAP (Suppressor-of-White-APricot)/surp domain-containing protein / ubiquitin family protein
AT1G14650.2	521	605	663	152	1044	1190	6.08734	-0.0512856	0.72202	SWAP (Suppressor-of-White-APricot)/surp domain-containing protein / ubiquitin family protein
AT1G14660.1	58	56	56	11	58	109	2.72209	-0.406207	0.0813262	Na+/H+ exchanger 8
AT1G14660.2	55	52	51	10	58	102	2.68557	-0.368474	0.137004	Na+/H+ exchanger 8
AT1G14670.1	851	958	1017	342	1985	2558	6.7796	0.332932	0.00108793	Endomembrane protein 70 protein family
AT1G14680.1	6	9	7	5	12	15	0.283606	0.0920861	0.836479	unknown protein
AT1G14685.1	198	210	211	59	386	474	4.75756	0.10198	0.63066	basic pentacysteine 2
AT1G14685.2	198	216	221	61	382	461	4.77549	0.0458576	0.910516	basic pentacysteine 2
AT1G14685.3	208	227	241	62	398	478	4.82263	0.00807833	1	basic pentacysteine 2
AT1G14686.1	4	3	3	0	1	1	-1.70974	-2.54904	0.0620955	ENTH/ANTH/VHS superfamily protein
AT1G14687.1	12	18	14	2	17	25	1.03386	-0.464495	0.34945	homeobox protein 32
AT1G14688.1	0	0	0	0	0	0	-2.72214	5.12548e-15	1	unknown protein
AT1G14690.1	357	378	415	62	607	660	5.29009	-0.285366	0.00329845	microtubule-associated protein 65-7
AT1G14690.2	351	362	406	62	589	645	5.25656	-0.278282	0.00387233	microtubule-associated protein 65-7
AT1G14700.1	274	291	356	102	547	730	5.38488	0.13068	0.369544	purple acid phosphatase 3
AT1G14700.2	259	272	331	92	499	696	5.29564	0.11935	0.472098	purple acid phosphatase 3
AT1G14710.1	573	617	626	171	1129	1416	6.32475	0.106078	0.371029	hydroxyproline-rich glycoprotein family protein
AT1G14710.2	571	603	622	170	1122	1402	6.31225	0.111074	0.330588	hydroxyproline-rich glycoprotein family protein
AT1G14720.1	300	326	337	100	612	680	5.40698	0.0762804	0.584516	xyloglucan endotransglucosylase/hydrolase 28
AT1G14730.1	141	150	136	47	287	380	3.90011	0.263372	0.310237	Cytochrome b561/ferric reductase transmembrane protein family
AT1G14740.1	466	523	514	124	847	1085	5.71971	-0.0394391	0.879804	Protein of unknown function (DUF1423)
AT1G14750.1	6	11	12	10	20	29	0.719431	0.650715	0.156457	Cyclin family protein
AT1G14750.2	4	6	8	8	13	14	0.0107273	0.594495	0.231368	Cyclin family protein
AT1G14755.1	0	0	0	0	0	0	-2.69873	5.12548e-15	1	S locus-related glycoprotein 1 (SLR1) binding pollen coat protein family
AT1G14760.1	1	2	0	0	4	1	-1.77061	0.24971	1	KNOX Arabidopsis thaliana meinox
AT1G14760.2	1	2	0	0	6	1	-1.16164	0.703038	0.954186	KNOX Arabidopsis thaliana meinox
AT1G14760.3	2	2	0	0	3	1	-1.55487	-0.425808	0.92513	KNOX Arabidopsis thaliana meinox
AT1G14770.1	64	68	68	18	92	129	2.94418	-0.204915	0.538765	RING/FYVE/PHD zinc finger superfamily protein
AT1G14770.2	60	63	63	18	86	123	2.85762	-0.172714	0.672814	RING/FYVE/PHD zinc finger superfamily protein
AT1G14780.1	55	50	46	12	110	106	2.07589	0.0918788	1	MAC/Perforin domain-containing protein
AT1G14790.1	142	131	145	30	180	221	3.74832	-0.418875	0.00969338	RNA-dependent RNA polymerase 1
AT1G14800.1	0	0	1	0	1	0	-2.48287	-0.333174	1	Nucleic acid-binding, OB-fold-like protein
AT1G14810.1	627	707	724	190	1475	1748	6.65745	0.234512	0.0218006	semialdehyde dehydrogenase family protein
AT1G14820.1	106	125	129	27	170	212	3.68723	-0.279565	0.104111	Sec14p-like phosphatidylinositol transfer family protein
AT1G14820.2	107	120	129	27	168	207	3.68785	-0.287425	0.0897373	Sec14p-like phosphatidylinositol transfer family protein
AT1G14820.3	116	134	138	29	191	229	3.80829	-0.253021	0.115825	Sec14p-like phosphatidylinositol transfer family protein
AT1G14830.1	774	847	838	277	1552	1966	6.52243	0.175892	0.10353	DYNAMIN-like 1C
AT1G14840.1	375	364	433	86	537	649	5.44307	-0.344629	0.000410414	microtubule-associated proteins 70-4
AT1G14840.2	359	345	420	86	526	621	5.39048	-0.325792	0.00119676	microtubule-associated proteins 70-4
AT1G14850.1	303	365	401	96	700	869	5.5272	0.158678	0.292064	nucleoporin 155
AT1G14860.1	46	57	51	17	116	182	2.59208	0.527368	0.0939712	nudix hydrolase homolog 18
AT1G14870.1	894	858	706	295	1591	2076	6.20294	0.243591	0.58769	PLANT CADMIUM RESISTANCE 2
AT1G14880.1	7	0	6	0	2	6	-1.57555	-1.24621	0.383016	PLANT CADMIUM RESISTANCE 1
AT1G14890.1	126	147	154	22	190	211	3.9434	-0.480317	0.000179537	Plant invertase/pectin methylesterase inhibitor superfamily protein
AT1G14900.1	322	304	364	77	467	606	5.37526	-0.250698	0.0357537	high mobility group A
AT1G14910.1	239	265	327	108	480	593	5.01697	0.0999322	0.457887	ENTH/ANTH/VHS superfamily protein
AT1G14920.1	335	316	396	73	560	582	5.31035	-0.256946	0.0509664	GRAS family transcription factor family protein
AT1G14930.1	2	2	2	0	1	8	-1.51386	0.0389524	1	Polyketide cyclase/dehydrase and lipid transport superfamily protein
AT1G14940.1	1	0	0	0	0	0	-2.63042	-2.06406	1	Polyketide cyclase/dehydrase and lipid transport superfamily protein
AT1G14940.2	1	0	0	0	0	0	-2.63042	-2.06406	1	Polyketide cyclase/dehydrase and lipid transport superfamily protein
AT1G14950.1	1	0	0	0	0	0	-2.38614	-2.07379	1	Polyketide cyclase/dehydrase and lipid transport superfamily protein
AT1G14960.1	72	76	61	21	163	230	3.01365	0.421374	0.540995	Polyketide cyclase/dehydrase and lipid transport superfamily protein
AT1G14970.1	64	73	68	17	137	157	3.17183	0.130066	0.810429	O-fucosyltransferase family protein
AT1G14980.1	670	829	829	225	1777	1922	6.77687	0.260494	0.0180955	chaperonin 10
AT1G14990.1	64	73	69	26	143	169	3.22436	0.254494	0.186117	unknown protein
AT1G14990.2	51	56	50	23	111	129	2.9042	0.291811	0.180534	unknown protein
AT1G15000.1	121	117	138	38	247	296	4.25865	0.162594	0.459188	serine carboxypeptidase-like 50
AT1G15010.1	1	2	16	1	2	7	-0.806307	-1.27837	0.481888	unknown protein
AT1G15015.1	0	0	1	0	0	1	-2.54443	-0.340776	1	F-box family protein
AT1G15020.1	130	145	147	42	300	363	4.00032	0.265599	0.151342	quiescin-sulfhydryl oxidase 1
AT1G15020.2	150	165	157	43	326	398	4.16256	0.217207	0.298154	quiescin-sulfhydryl oxidase 1
AT1G15030.1	351	368	381	97	550	703	5.16414	-0.164575	0.223081	Protein of unknown function (DUF789)
AT1G15040.1	29	30	38	7	74	88	2.0845	0.25896	0.827159	Class I glutamine amidotransferase-like superfamily protein
AT1G15040.2	26	29	37	7	73	82	2.01638	0.287201	0.788583	Class I glutamine amidotransferase-like superfamily protein
AT1G15050.1	4	1	1	0	2	1	-1.56556	-1.3458	0.556464	indole-3-acetic acid inducible 34
AT1G15060.1	344	406	378	108	563	641	5.21849	-0.217362	0.150121	Uncharacterised conserved protein UCP031088, alpha/beta hydrolase
[truncated: 31,569 more rows]
[truncated: 1 more columns]
