# Supplementary material for: Companion cells with high florigen production express other small proteins and reveal a nitrogen-sensitive FT repressor
Source: bioRxiv preprint, doi:10.1101/2024.08.17.608367, version 2 (2025-08-08)
Supplement: Supplemental data 13 [file 608367_file15.xlsx]

## Sheet: DataS13_WTvpSUC2NIGT1.4#8
reference_id	WT.rep1	WT.rep2	WT.rep3	pSUC2:NIGT1.4#8.rep1	pSUC2:NIGT1.4#8.rep2	pSUC2:NIGT1.4#8.rep3	logconc	logfc	adj_pvalue	annotation
AT1G01010.1	144	99	139	144	156	167	3.28871	0.0232697	1	NAC domain containing protein 1
AT1G01020.1	114	141	139	201	206	159	3.73181	0.251996	0.156844	Arv1-like protein
AT1G01020.2	100	122	122	181	190	140	3.55455	0.298659	0.131239	Arv1-like protein
AT1G01030.1	37	52	38	36	38	25	1.84093	-0.626277	0.046017	AP2/B3-like transcriptional factor family protein
AT1G01040.1	630	674	601	632	602	551	5.70108	-0.359174	0.000516395	dicer-like 1
AT1G01040.2	594	637	565	600	578	529	5.63001	-0.338498	0.00136304	dicer-like 1
AT1G01046.1	6	5	5	5	5	3	-1.06573	-0.55491	0.791549	MIR838a; miRNA
AT1G01050.1	865	895	780	1140	1192	999	6.11597	0.123541	0.177095	pyrophosphorylase 1
AT1G01060.1	766	870	729	1005	888	765	5.86779	-0.0981598	0.494018	Homeodomain-like superfamily protein
AT1G01060.2	753	863	711	993	875	758	5.8433	-0.0917597	0.544239	Homeodomain-like superfamily protein
AT1G01060.3	715	800	680	928	784	707	5.7059	-0.125425	0.384417	Homeodomain-like superfamily protein
AT1G01060.4	759	861	722	995	881	765	5.85574	-0.0930355	0.533833	Homeodomain-like superfamily protein
AT1G01060.5	678	768	648	890	756	685	5.64594	-0.110541	0.481011	Homeodomain-like superfamily protein
AT1G01070.1	239	176	184	208	264	221	3.77933	-0.0594292	0.921668	nodulin MtN21 /EamA-like transporter family protein
AT1G01070.2	227	153	169	190	245	198	3.63436	-0.0662656	0.910235	nodulin MtN21 /EamA-like transporter family protein
AT1G01080.1	852	1075	882	1109	1278	883	6.19545	-0.0528226	0.759993	RNA-binding (RRM/RBD/RNP motifs) family protein
AT1G01080.2	801	1007	822	1022	1186	830	6.09443	-0.0633211	0.667503	RNA-binding (RRM/RBD/RNP motifs) family protein
AT1G01090.1	2277	2531	2275	2791	2931	2214	7.47263	-0.107766	0.165049	pyruvate dehydrogenase E1 alpha
AT1G01100.1	2344	2373	2291	2780	3302	2487	7.63854	0.0167109	1	60S acidic ribosomal protein family
AT1G01100.2	2798	2830	2737	3410	3980	3058	7.87467	0.0481078	0.805242	60S acidic ribosomal protein family
AT1G01100.3	2212	2230	2164	2633	3058	2402	7.48696	0.0211744	1	60S acidic ribosomal protein family
AT1G01100.4	2334	2366	2281	2750	3268	2455	7.63071	0.00594837	1	60S acidic ribosomal protein family
AT1G01110.1	61	50	59	81	110	67	2.33711	0.324882	0.269389	IQ-domain 18
AT1G01110.2	73	65	74	104	127	90	2.63146	0.326187	0.142581	IQ-domain 18
AT1G01120.1	738	749	536	1269	1298	1463	5.94057	0.744585	7.93e-10	3-ketoacyl-CoA synthase 1
AT1G01130.1	18	8	5	17	15	19	0.172489	0.45306	0.563999	unknown protein
AT1G01140.1	399	510	369	583	665	469	5.16396	0.156565	0.37367	CBL-interacting protein kinase 9
AT1G01140.2	377	479	344	557	628	439	5.08363	0.166786	0.34426	CBL-interacting protein kinase 9
AT1G01140.3	378	479	347	557	628	436	5.06112	0.158955	0.342992	CBL-interacting protein kinase 9
AT1G01150.1	6	0	1	0	3	1	-1.9389	-1.02554	0.8105	Homeodomain-like protein with RING/FYVE/PHD-type zinc finger domain
AT1G01160.1	317	295	279	459	464	338	4.85951	0.228315	0.067066	GRF1-interacting factor 2
AT1G01160.2	280	271	250	418	413	309	4.7337	0.237387	0.0699737	GRF1-interacting factor 2
AT1G01170.1	420	507	389	603	751	525	5.40963	0.243303	0.0413563	Protein of unknown function (DUF1138)
AT1G01170.2	323	403	323	468	587	409	5.11028	0.209886	0.128063	Protein of unknown function (DUF1138)
AT1G01180.1	83	63	65	115	126	117	2.88533	0.495047	0.0165341	S-adenosyl-L-methionine-dependent methyltransferases superfamily protein
AT1G01183.1	0	0	0	0	0	0	-2.70399	0	1	MIR165/MIR165A; miRNA
AT1G01190.1	387	257	251	330	312	234	4.08669	-0.306999	0.229345	cytochrome P450, family 78, subfamily A, polypeptide 8
AT1G01200.1	50	25	44	52	53	42	1.75773	0.0321411	1	RAB GTPase homolog A3
AT1G01210.1	147	195	167	213	222	184	3.78104	0.0145727	1	DNA-directed RNA polymerase, subunit M, archaeal
AT1G01220.1	448	493	489	476	484	374	5.11957	-0.372086	0.000382646	L-fucokinase/GDP-L-fucose pyrophosphorylase
AT1G01225.1	49	40	44	51	71	48	1.97402	0.0817389	0.978357	NC domain-containing protein-related
AT1G01230.1	255	242	245	358	403	315	4.44531	0.265832	0.0159086	ORMDL family protein
AT1G01240.1	119	151	115	315	363	222	3.98158	0.949017	3.23e-10	unknown protein
AT1G01240.2	115	151	111	305	352	208	3.92319	0.921431	6.16e-09	unknown protein
AT1G01240.3	137	157	120	329	383	234	4.03618	0.915773	1.13e-09	unknown protein
AT1G01250.1	46	46	21	34	29	17	2.2763	-0.763288	0.0251852	Integrase-type DNA-binding superfamily protein
AT1G01260.1	223	193	197	209	228	173	4.03423	-0.278293	0.0512143	basic helix-loop-helix (bHLH) DNA-binding superfamily protein
AT1G01260.2	213	178	189	200	217	169	3.95061	-0.256394	0.0969894	basic helix-loop-helix (bHLH) DNA-binding superfamily protein
AT1G01260.3	217	188	194	208	220	177	3.99692	-0.255715	0.0716519	basic helix-loop-helix (bHLH) DNA-binding superfamily protein
AT1G01280.1	0	0	0	0	0	0	-0.721524	0	1	cytochrome P450, family 703, subfamily A, polypeptide 2
AT1G01290.1	120	116	136	206	167	141	3.55094	0.195027	0.363297	cofactor of nitrate reductase and xanthine dehydrogenase 3
AT1G01290.2	122	125	133	210	175	146	3.59661	0.212208	0.277474	cofactor of nitrate reductase and xanthine dehydrogenase 3
AT1G01300.1	725	766	695	750	718	811	5.86228	-0.196425	0.157515	Eukaryotic aspartyl protease family protein
AT1G01310.1	0	1	0	2	3	0	-2.18023	1.74105	0.699157	CAP (Cysteine-rich secretory proteins, Antigen 5, and Pathogenesis-related 1 protein) superfamily protein
AT1G01320.1	6480	8816	6746	6263	6559	5144	9.0019	-0.560965	1.21e-14	Tetratricopeptide repeat (TPR)-like superfamily protein
AT1G01320.2	6448	8780	6696	6202	6471	5153	8.99247	-0.56374	7.87e-15	Tetratricopeptide repeat (TPR)-like superfamily protein
AT1G01340.1	88	87	93	64	82	107	2.73357	-0.337844	0.294054	cyclic nucleotide gated channel 10
AT1G01340.2	91	94	97	73	86	111	2.8267	-0.317374	0.347139	cyclic nucleotide gated channel 10
AT1G01350.1	250	237	237	304	317	284	4.27889	0.0541555	0.882137	Zinc finger (CCCH-type/C3HC4-type RING finger) family protein
AT1G01355.1	1	0	0	0	0	0	-2.44103	-1.97808	1	Putative endonuclease or glycosyl hydrolase
AT1G01360.1	138	129	144	151	166	151	3.73044	-0.0809389	0.811321	regulatory component of ABA receptor 1
AT1G01370.1	63	67	72	88	100	66	2.68991	0.0580334	1	Histone superfamily protein
AT1G01370.2	62	67	74	87	100	69	2.70577	0.0623284	0.991333	Histone superfamily protein
AT1G01380.1	19	11	22	24	21	19	0.824644	0.0295663	1	Homeodomain-like superfamily protein
AT1G01390.1	67	96	68	57	74	59	3.00954	-0.547097	0.010499	UDP-Glycosyltransferase superfamily protein
AT1G01400.1	0	0	0	0	0	0	-2.66844	0	1	unknown protein
AT1G01420.1	113	135	124	86	101	62	3.63137	-0.850613	2.59e-07	UDP-glucosyl transferase 72B3
AT1G01430.1	551	707	526	1050	1095	854	5.7608	0.482395	1.38e-07	TRICHOME BIREFRINGENCE-LIKE 25
AT1G01440.1	218	204	198	260	258	257	4.00727	0.0561398	0.854512	Protein of unknown function (DUF3133)
AT1G01450.1	45	45	48	59	58	62	2.00624	0.110351	0.910235	Protein kinase superfamily protein
AT1G01453.1	5	4	8	7	8	6	-1.13614	0.0277481	1	unknown protein
AT1G01453.2	5	3	8	7	6	4	-1.27024	-0.189063	1	unknown protein
AT1G01460.1	0	0	0	0	0	0	-2.66835	0	1	Phosphatidylinositol-4-phosphate 5-kinase, core
AT1G01470.1	565	460	451	792	867	579	6.02059	0.322237	0.00613909	Late embryogenesis abundant protein
AT1G01480.1	12	14	26	18	17	33	0.303542	0.130167	1	1-amino-cyclopropane-1-carboxylate synthase 2
AT1G01480.2	11	12	22	16	14	24	0.126769	1.68e-05	1	1-amino-cyclopropane-1-carboxylate synthase 2
AT1G01490.1	665	749	657	980	1090	931	6.00522	0.269173	0.0247531	Heavy metal transport/detoxification superfamily protein
AT1G01490.2	613	697	621	907	1023	857	5.91791	0.262433	0.0366118	Heavy metal transport/detoxification superfamily protein
AT1G01500.1	195	188	163	169	194	141	4.00457	-0.385449	0.00646191	Erythronate-4-phosphate dehydrogenase family protein
AT1G01510.1	600	606	518	733	718	620	5.51854	-0.00238368	1	NAD(P)-binding Rossmann-fold superfamily protein
AT1G01520.1	45	62	59	29	31	21	2.2834	-1.3	6.07e-09	Homeodomain-like superfamily protein
AT1G01540.1	739	782	706	1234	1209	1344	6.01126	0.509759	1.25e-07	Protein kinase superfamily protein
AT1G01540.2	771	814	741	1301	1264	1409	6.08708	0.516421	3.7e-08	Protein kinase superfamily protein
AT1G01550.1	1211	1225	1132	1568	1586	1427	6.78005	0.0946033	0.418629	Protein of unknown function (DUF793)
AT1G01550.2	1134	1168	1057	1483	1496	1353	6.71173	0.101628	0.366116	Protein of unknown function (DUF793)
AT1G01560.1	11	10	13	11	8	12	0.527896	-0.389076	0.804184	MAP kinase 11
AT1G01560.2	12	10	16	13	9	14	0.6745	-0.336515	0.840653	MAP kinase 11
AT1G01570.1	41	39	25	36	39	32	1.25956	-0.239534	0.600135	Protein of unknown function (DUF604)
AT1G01580.1	274	25	58	500	246	233	3.81694	1.168	0.183364	ferric reduction oxidase 2
AT1G01590.1	5	3	3	6	7	4	-0.682631	0.346399	0.975544	ferric reduction oxidase 1
AT1G01600.1	175	142	145	145	121	157	3.56552	-0.385121	0.0886447	cytochrome P450, family 86, subfamily A, polypeptide 4
AT1G01610.1	766	700	646	863	869	797	5.79437	-0.00583978	1	glycerol-3-phosphate acyltransferase 4
AT1G01620.1	4121	4068	3657	7674	7138	7528	8.42658	0.657215	7.6e-20	plasma membrane intrinsic protein 1C
AT1G01620.2	3641	3576	3237	6846	6383	6718	8.26649	0.673796	3.28e-21	plasma membrane intrinsic protein 1C
AT1G01630.1	723	698	704	948	937	888	5.862	0.117869	0.277903	Sec14p-like phosphatidylinositol transfer family protein
AT1G01640.1	60	35	60	97	94	77	2.14057	0.514997	0.0355423	BTB/POZ domain-containing protein
AT1G01640.2	50	29	54	93	80	69	2.02363	0.588271	0.0241238	BTB/POZ domain-containing protein
AT1G01650.1	480	361	339	470	454	379	4.97637	-0.127059	0.469105	SIGNAL PEPTIDE PEPTIDASE-LIKE 4
AT1G01650.2	460	346	330	456	443	373	4.9403	-0.106853	0.580372	SIGNAL PEPTIDE PEPTIDASE-LIKE 4
AT1G01660.1	30	20	27	18	30	18	0.607706	-0.496837	0.319576	RING/U-box superfamily protein
AT1G01670.1	26	14	28	16	16	11	0.57101	-0.930226	0.025488	RING/U-box superfamily protein
AT1G01680.1	1	2	2	3	4	2	-0.870703	0.542351	1	plant U-box 54
AT1G01690.1	85	67	85	89	126	89	2.81924	0.0868495	0.890988	putative recombination initiation defects 3
AT1G01695.1	4	3	5	7	7	6	-0.729941	0.454661	0.832929	Phosphatidylinositol N-acetyglucosaminlytransferase subunit P-related
AT1G01700.1	24	24	27	21	21	19	0.897544	-0.563519	0.143281	RHO guanyl-nucleotide exchange factor 2
AT1G01710.1	382	362	369	503	564	437	5.02827	0.162572	0.214764	Acyl-CoA thioesterase family protein
AT1G01720.1	482	464	462	652	571	474	5.58236	-0.00211746	1	NAC (No Apical Meristem) domain transcriptional regulator superfamily protein
AT1G01725.1	44	56	42	71	87	58	2.24771	0.334801	0.224192	unknown protein
AT1G01730.1	134	162	162	242	238	187	3.93849	0.272668	0.0442431	unknown protein
AT1G01740.1	64	86	67	73	78	47	2.68515	-0.401449	0.0643623	Protein kinase protein with tetratricopeptide repeat domain
AT1G01740.2	67	92	69	74	83	52	2.7452	-0.39398	0.0515571	Protein kinase protein with tetratricopeptide repeat domain
AT1G01750.1	165	96	135	199	150	167	3.10316	0.113091	0.91215	actin depolymerizing factor 11
AT1G01760.1	37	32	31	44	49	57	1.6707	0.322835	0.444059	adenosine deaminases;RNA binding;RNA binding;adenosine deaminases
AT1G01770.1	208	234	210	316	270	263	4.24037	0.115448	0.54517	unknown protein
AT1G01780.1	133	102	97	173	193	148	3.5159	0.358339	0.120054	GATA type zinc finger transcription factor family protein
AT1G01790.1	2590	2826	2548	2745	2595	2292	7.75721	-0.327819	2.46e-05	K+ efflux antiporter 1
AT1G01800.1	791	831	787	975	1056	852	6.03513	-0.0106754	1	NAD(P)-binding Rossmann-fold superfamily protein
AT1G01800.2	747	772	738	923	990	801	5.95298	-0.00389173	1	NAD(P)-binding Rossmann-fold superfamily protein
AT1G01810.1	5	9	10	6	8	9	-0.271351	-0.322752	0.877501	unknown protein
AT1G01820.1	364	343	373	504	519	417	5.23926	0.143719	0.247865	peroxin 11c
AT1G01830.1	233	262	230	244	273	173	4.31594	-0.344729	0.00897549	ARM repeat superfamily protein
AT1G01830.2	240	269	239	252	277	176	4.34855	-0.358851	0.00535323	ARM repeat superfamily protein
AT1G01830.3	250	277	251	262	285	181	4.39181	-0.369456	0.00296499	ARM repeat superfamily protein
AT1G01840.1	36	37	25	40	54	43	1.88891	0.215269	0.616886	unknown protein
AT1G01860.1	167	208	146	176	231	152	3.82815	-0.167998	0.401643	Ribosomal RNA adenine dimethylase family protein
AT1G01880.1	18	15	27	30	25	36	1.2004	0.334386	0.549266	5'-3' exonuclease family protein
AT1G01880.2	15	15	27	29	24	36	1.14897	0.376799	0.463231	5'-3' exonuclease family protein
AT1G01900.1	303	319	316	344	393	298	4.48973	-0.129313	0.407379	subtilase family protein
AT1G01910.1	557	548	561	765	740	649	5.48992	0.101522	0.492911	P-loop containing nucleoside triphosphate hydrolases superfamily protein
AT1G01910.2	622	614	643	851	849	727	5.68429	0.0992189	0.447699	P-loop containing nucleoside triphosphate hydrolases superfamily protein
AT1G01910.3	600	590	608	799	805	685	5.60775	0.0784664	0.598026	P-loop containing nucleoside triphosphate hydrolases superfamily protein
AT1G01910.4	563	557	572	777	753	663	5.51718	0.105165	0.471855	P-loop containing nucleoside triphosphate hydrolases superfamily protein
AT1G01910.5	516	507	520	688	694	599	5.41221	0.0912724	0.513039	P-loop containing nucleoside triphosphate hydrolases superfamily protein
AT1G01920.1	163	147	164	227	253	181	3.87897	0.208475	0.161497	SET domain-containing protein
AT1G01920.2	181	166	196	256	281	202	4.04396	0.172287	0.278405	SET domain-containing protein
AT1G01930.1	177	214	185	255	283	221	4.05675	0.129284	0.450784	zinc finger protein-related
AT1G01940.1	125	104	141	166	205	138	3.5859	0.184008	0.413138	Cyclophilin-like peptidyl-prolyl cis-trans isomerase family protein
AT1G01950.1	351	372	337	370	397	401	4.73366	-0.123691	0.385534	armadillo repeat kinesin 2
AT1G01950.2	324	350	323	353	381	380	4.65565	-0.104225	0.509112	armadillo repeat kinesin 2
AT1G01950.3	337	358	328	358	389	383	4.69095	-0.12099	0.399291	armadillo repeat kinesin 2
AT1G01960.1	1427	1350	1287	1531	1488	1378	6.54569	-0.15236	0.0986627	SEC7-like guanine nucleotide exchange family protein
AT1G01970.1	365	484	405	380	481	264	5.14599	-0.434014	0.000116541	Tetratricopeptide repeat (TPR)-like superfamily protein
AT1G01980.1	0	0	1	0	0	1	-2.51819	-0.193818	1	FAD-binding Berberine family protein
AT1G01990.1	172	205	212	259	297	224	4.13391	0.133853	0.484309	unknown protein
AT1G02000.1	126	126	129	174	169	135	3.46542	0.0566529	0.952417	UDP-D-glucuronate 4-epimerase 2
AT1G02010.1	161	180	147	174	201	165	3.92862	-0.121103	0.610912	secretory 1A
AT1G02010.2	137	147	125	151	163	147	3.661	-0.0936328	0.781138	secretory 1A
AT1G02020.1	155	186	151	174	209	172	3.80948	-0.0927558	0.758288	nitroreductase family protein
AT1G02020.2	150	172	142	167	199	170	3.73252	-0.0579577	0.936042	nitroreductase family protein
AT1G02030.1	6	2	5	8	10	10	-0.283418	0.822068	0.400592	C2H2-like zinc finger protein
AT1G02040.1	0	0	0	0	0	0	-2.65111	0	1	C2H2-type zinc finger family protein
AT1G02050.1	63	52	79	98	89	70	2.85855	0.123032	0.970885	Chalcone and stilbene synthase family protein
AT1G02060.1	84	93	88	96	111	77	2.78852	-0.170681	0.536805	Tetratricopeptide repeat (TPR)-like superfamily protein
AT1G02065.1	14	20	12	17	18	13	1.4112	-0.204571	0.858047	squamosa promoter binding protein-like 8
AT1G02065.2	13	18	10	16	19	12	1.30839	-0.0707074	1	squamosa promoter binding protein-like 8
AT1G02070.1	5	0	1	2	3	4	-1.23134	0.302361	1	unknown protein
AT1G02074.1	0	0	0	0	0	0	-2.72213	0	1	unknown protein
AT1G02080.1	2058	1916	1860	2121	1977	1837	7.19149	-0.24161	0.0180023	transcription regulators
AT1G02080.2	2106	1946	1889	2153	2004	1866	7.21261	-0.24653	0.0167987	transcription regulators
AT1G02090.1	368	383	384	517	509	424	5.09145	0.0839018	0.563463	Proteasome component (PCI) domain protein
AT1G02090.2	353	376	378	493	500	402	5.03278	0.0635812	0.728638	Proteasome component (PCI) domain protein
AT1G02090.3	377	384	391	511	521	420	5.1042	0.0638272	0.711527	Proteasome component (PCI) domain protein
AT1G02100.1	320	305	331	472	533	414	4.9136	0.298326	0.00217303	Leucine carboxyl methyltransferase
AT1G02100.2	297	285	308	432	480	382	4.77965	0.26901	0.0108127	Leucine carboxyl methyltransferase
AT1G02100.3	318	306	328	461	525	405	4.89819	0.275458	0.00719672	Leucine carboxyl methyltransferase
AT1G02110.1	332	391	355	462	543	385	4.91507	0.0948406	0.569653	Protein of unknown function (DUF630 and DUF632)
AT1G02120.1	710	681	652	913	773	768	5.95587	-0.000302282	1	GRAM domain family protein
AT1G02130.1	569	539	466	677	704	600	5.48982	0.0643713	0.667787	RAS 5
AT1G02140.1	1173	1131	1044	1555	1585	1302	6.61893	0.138349	0.125408	mago nashi family protein
AT1G02145.1	277	237	221	276	356	281	4.40081	0.043473	0.934077	homolog of asparagine-linked glycosylation 12
AT1G02145.2	201	176	173	195	262	207	3.96656	0.0025818	1	homolog of asparagine-linked glycosylation 12
AT1G02145.3	291	247	231	286	374	293	4.46389	0.039958	0.93756	homolog of asparagine-linked glycosylation 12
AT1G02145.4	282	242	221	271	352	278	4.41556	0.00516299	1	homolog of asparagine-linked glycosylation 12
AT1G02150.1	1489	1900	1476	1927	2122	1488	6.97721	-0.0844157	0.478052	Tetratricopeptide repeat (TPR)-like superfamily protein
AT1G02160.1	162	176	168	231	244	200	4.04785	0.146673	0.452362	Cox19 family protein (CHCH motif)
AT1G02160.2	145	153	154	200	215	175	3.86102	0.114899	0.617556	Cox19 family protein (CHCH motif)
AT1G02170.1	299	230	241	372	361	315	4.47553	0.175093	0.247865	metacaspase 1
AT1G02180.1	61	77	59	67	80	70	2.41744	-0.126422	0.782456	ferredoxin-related
AT1G02190.1	6	12	9	7	16	6	1.58196	-0.166771	1	Fatty acid hydroxylase superfamily
AT1G02190.2	6	11	9	6	14	6	1.5184	-0.267155	0.886011	Fatty acid hydroxylase superfamily
AT1G02205.1	787	972	545	1365	1101	612	6.50531	0.141882	0.781758	Fatty acid hydroxylase superfamily
AT1G02205.2	812	999	560	1399	1129	626	6.54219	0.135601	0.799335	Fatty acid hydroxylase superfamily
AT1G02205.3	743	927	515	1273	1013	568	6.40089	0.109937	0.870209	Fatty acid hydroxylase superfamily
AT1G02220.1	401	165	240	310	309	289	4.44697	-0.102196	0.882931	NAC domain containing protein 3
AT1G02230.1	33	10	25	40	28	27	0.88077	0.205379	0.821075	NAC domain containing protein 4
AT1G02250.1	14	2	5	10	8	7	-0.395835	-0.0234124	1	NAC domain containing protein 5
AT1G02260.1	204	162	183	227	267	182	3.96084	0.025314	1	Divalent ion symporter
AT1G02270.1	272	289	244	292	309	242	4.49191	-0.202095	0.113234	Calcium-binding endonuclease/exonuclease/phosphatase family
AT1G02280.1	883	1090	821	1084	1290	900	6.10125	-0.041524	0.862783	translocon at the outer envelope membrane of chloroplasts 33
AT1G02280.2	846	1046	794	1018	1253	851	6.04924	-0.0541793	0.784444	translocon at the outer envelope membrane of chloroplasts 33
AT1G02290.1	146	144	129	139	181	137	3.42754	-0.143791	0.489063	unknown protein
AT1G02300.1	111	107	95	210	245	149	3.75468	0.669285	0.0011635	Cysteine proteinases superfamily protein
AT1G02305.1	1054	921	880	1310	1171	1085	6.34323	0.0539464	0.8105	Cysteine proteinases superfamily protein
AT1G02310.1	46	25	25	55	36	35	1.50526	0.122248	0.984425	Glycosyl hydrolase superfamily protein
AT1G02320.1	0	0	0	0	0	0	-2.65088	0	1	unknown protein
AT1G02330.1	396	358	374	450	457	359	4.91118	-0.105479	0.499077	unknown protein
AT1G02335.1	215	200	177	310	236	239	4.104	0.143212	0.632051	germin-like protein subfamily 2 member 2 precursor
AT1G02340.1	193	214	194	180	216	184	4.90611	-0.317589	0.164527	basic helix-loop-helix (bHLH) DNA-binding superfamily protein
AT1G02350.1	13	25	10	12	19	15	0.500077	-0.317567	0.786844	protoporphyrinogen oxidase-related
AT1G02360.1	410	180	324	356	322	382	4.61649	-0.0542276	1	Chitinase family protein
AT1G02370.1	92	100	135	133	125	121	3.25732	-0.0568966	0.976689	Tetratricopeptide repeat (TPR)-like superfamily protein
AT1G02380.1	33	32	22	109	90	125	1.67987	1.64166	1.2e-11	unknown protein
AT1G02390.1	35	18	23	31	52	27	1.62035	0.251796	0.737681	glycerol-3-phosphate acyltransferase 2
AT1G02400.1	107	50	63	62	72	67	2.56724	-0.399728	0.20806	gibberellin 2-oxidase 6
AT1G02405.1	1	1	2	3	3	1	-1.8066	0.500352	0.995792	proline-rich family protein
AT1G02410.1	278	254	222	329	328	269	4.38673	0.0278771	0.991024	cytochrome c oxidase assembly protein CtaG / Cox11 family
AT1G02420.1	63	53	52	44	57	42	2.08715	-0.50011	0.0275443	Pentatricopeptide repeat (PPR) superfamily protein
AT1G02430.1	20	20	17	27	26	24	0.884269	0.16545	0.909925	ADP-ribosylation factor D1B
AT1G02440.1	5	1	2	7	3	3	-1.29126	0.411047	0.978258	ADP-ribosylation factor D1A
AT1G02450.1	4	4	7	13	2	6	-0.533759	0.21501	1	NIM1-interacting 1
AT1G02460.1	61	39	53	57	47	55	1.82719	-0.210287	0.731446	Pectin lyase-like superfamily protein
AT1G02470.1	3	8	8	15	4	5	-0.0232796	0.0678016	1	Polyketide cyclase/dehydrase and lipid transport superfamily protein
AT1G02470.2	3	7	4	15	4	5	-0.122296	0.502114	0.699053	Polyketide cyclase/dehydrase and lipid transport superfamily protein
AT1G02475.1	470	606	443	589	719	558	5.5013	0.0310992	0.976546	Polyketide cyclase/dehydrase and lipid transport superfamily protein
AT1G02490.1	2	1	0	0	1	0	-2.534	-1.51393	0.910627	unknown protein
AT1G02500.1	4459	3723	3835	5827	5372	4689	8.44148	0.131855	0.334138	S-adenosylmethionine synthetase 1
AT1G02500.2	4253	3557	3657	5550	5154	4470	8.37882	0.13294	0.316483	S-adenosylmethionine synthetase 1
AT1G02510.1	0	0	0	0	0	0	-2.56664	0	1	Outward rectifying potassium channel protein
AT1G02520.1	627	255	362	613	322	408	4.74253	-0.1585	0.823623	P-glycoprotein 11
AT1G02530.1	64	27	36	61	20	51	1.51551	-0.195534	0.872127	P-glycoprotein 12
AT1G02540.1	0	0	0	0	0	0	-2.70394	0	1	unknown protein
AT1G02560.1	2703	3417	2701	3263	4071	2987	7.79226	-0.0423821	0.821466	nuclear encoded CLP protease 5
AT1G02570.1	4	1	6	7	2	14	-0.965416	0.802653	0.497971	unknown protein
AT1G02575.1	5	2	5	3	4	5	-1.52592	-0.260193	1	unknown protein
AT1G02580.1	1	6	3	7	6	4	-1.14939	0.483626	0.859789	SET domain-containing protein
AT1G02610.1	12	12	9	103	65	124	1.25624	2.89515	1.24e-14	RING/FYVE/PHD zinc finger superfamily protein
AT1G02620.1	0	0	0	1	2	3	-2.24486	3.97271	0.152405	Ras-related small GTP-binding family protein
AT1G02630.1	4	4	6	5	8	9	-0.457158	0.376741	0.910287	Nucleoside transporter family protein
AT1G02630.2	3	3	5	4	6	8	-0.727368	0.432435	0.789012	Nucleoside transporter family protein
AT1G02640.1	158	164	150	437	330	713	3.72574	1.42323	1.13e-09	beta-xylosidase 2
AT1G02650.1	2	11	11	10	11	37	-0.489938	1.05082	0.192837	Tetratricopeptide repeat (TPR)-like superfamily protein
AT1G02660.1	59	78	50	238	129	623	2.63484	2.22062	3.16e-09	alpha/beta-Hydrolases superfamily protein
AT1G02670.1	20	19	11	26	32	23	1.24897	0.425419	0.466786	P-loop containing nucleoside triphosphate hydrolases superfamily protein
AT1G02680.1	92	92	87	135	157	110	3.25664	0.296903	0.157146	TBP-associated factor 13
AT1G02681.1	0	0	0	0	0	1	-2.66845	1.7868	1	pseudogene
AT1G02690.1	327	269	290	309	347	315	4.44958	-0.135958	0.531258	importin alpha isoform 6
AT1G02690.2	315	255	286	295	335	300	4.38879	-0.149545	0.484238	importin alpha isoform 6
AT1G02700.1	14	17	11	11	14	16	0.408579	-0.290887	0.836002	unknown protein
AT1G02710.1	13	18	21	6	16	15	0.523138	-0.751426	0.187537	glycine-rich protein
AT1G02720.1	179	186	193	204	228	209	3.80491	-0.0670705	0.862844	galacturonosyltransferase 5
AT1G02720.2	140	147	155	153	178	163	3.44621	-0.106515	0.767447	galacturonosyltransferase 5
AT1G02730.1	747	841	877	884	933	743	5.66079	-0.218475	0.19406	cellulose synthase-like D5
AT1G02740.1	74	90	83	116	127	94	2.88956	0.178219	0.508699	MRG family protein
AT1G02750.1	109	94	86	151	152	139	3.29478	0.345742	0.0629844	Drought-responsive family protein
AT1G02750.2	78	73	62	113	115	105	2.95655	0.377914	0.0851329	Drought-responsive family protein
AT1G02770.1	4	5	5	5	4	2	-0.825101	-0.601329	0.777533	Protein of unknown function (DUF626)
AT1G02780.1	9442	10081	9628	12124	13385	10522	9.52734	0.03388	0.853781	Ribosomal protein L19e family protein
AT1G02790.1	0	0	0	0	0	0	-2.70393	0	1	polygalacturonase 4
AT1G02800.1	86	95	70	66	97	59	2.7316	-0.447753	0.0615351	cellulase 2
AT1G02810.1	145	101	109	131	148	165	3.14649	0.0627207	0.992813	Plant invertase/pectin methylesterase inhibitor superfamily
AT1G02813.1	3	1	1	7	1	2	-1.48783	0.694232	0.967421	Protein of unknown function, DUF538
AT1G02816.1	192	155	179	346	295	270	3.92876	0.522209	0.000146064	Protein of unknown function, DUF538
AT1G02820.1	223	328	149	322	304	190	5.00711	-0.0444256	1	Late embryogenesis abundant 3 (LEA3) family protein
AT1G02830.1	0	0	0	0	1	0	-2.42608	1.77995	1	Ribosomal L22e protein family
AT1G02840.1	1127	1170	1115	1630	1655	1335	6.67699	0.166689	0.0449509	RNA-binding (RRM/RBD/RNP motifs) family protein
AT1G02840.2	1145	1202	1145	1689	1690	1355	6.71377	0.168121	0.0415937	RNA-binding (RRM/RBD/RNP motifs) family protein
AT1G02840.3	1087	1123	1073	1557	1582	1276	6.62272	0.156852	0.0548479	RNA-binding (RRM/RBD/RNP motifs) family protein
AT1G02850.1	252	303	201	503	431	331	4.6464	0.47596	0.110444	beta glucosidase 11
AT1G02850.2	249	305	204	507	428	332	4.64698	0.474679	0.11784	beta glucosidase 11
AT1G02850.3	248	301	200	496	422	326	4.62326	0.465452	0.128108	beta glucosidase 11
AT1G02850.4	240	291	196	492	413	322	4.58971	0.488578	0.106594	beta glucosidase 11
AT1G02850.5	254	311	207	514	434	338	4.67466	0.470033	0.123338	beta glucosidase 11
AT1G02860.1	81	110	83	170	115	157	3.04332	0.436781	0.0615809	SPX (SYG1/Pho81/XPR1) domain-containing protein
AT1G02860.2	71	104	79	152	106	140	2.90145	0.392704	0.0921492	SPX (SYG1/Pho81/XPR1) domain-containing protein
AT1G02870.1	190	221	216	287	283	269	4.21868	0.154064	0.354422	unknown protein
AT1G02880.1	225	162	156	215	221	195	3.95175	-0.0516263	0.950401	thiamin pyrophosphokinase1
AT1G02880.2	227	169	166	219	226	198	3.9832	-0.0743767	0.842984	thiamin pyrophosphokinase1
AT1G02880.3	233	175	167	226	231	205	4.01945	-0.0647231	0.901109	thiamin pyrophosphokinase1
AT1G02880.4	228	170	167	220	224	197	3.99114	-0.0865287	0.803231	thiamin pyrophosphokinase1
AT1G02890.1	1200	1170	1080	1407	1277	1213	6.53115	-0.0890331	0.520871	AAA-type ATPase family protein
AT1G02890.2	1135	1111	1013	1318	1176	1139	6.43401	-0.107252	0.403683	AAA-type ATPase family protein
AT1G02900.1	231	188	211	327	293	302	4.203	0.283684	0.125504	rapid alkalinization factor 1
AT1G02910.1	580	748	578	766	905	603	5.77043	-0.0175496	1	tetratricopeptide repeat (TPR)-containing protein
AT1G02920.1	1680	750	1031	1785	1074	1724	6.74184	0.1511	0.890018	glutathione S-transferase 7
AT1G02930.1	1038	541	734	1157	667	1208	6.30174	0.142132	0.894239	glutathione S-transferase 6
AT1G02930.2	926	495	663	1067	611	1082	6.13826	0.155848	0.860164	glutathione S-transferase 6
AT1G02940.1	7	2	1	1	4	0	-1.06524	-1.20537	0.352365	glutathione S-transferase (class phi) 5
AT1G02950.1	97	89	92	146	136	119	2.97744	0.259216	0.26089	glutathione S-transferase F4
AT1G02950.2	93	83	82	140	132	114	2.88472	0.312001	0.158669	glutathione S-transferase F4
AT1G02950.3	93	77	81	137	123	112	2.83788	0.29875	0.168054	glutathione S-transferase F4
AT1G02950.4	83	76	72	126	109	97	2.6923	0.254728	0.338039	glutathione S-transferase F4
AT1G02960.1	161	178	180	211	220	172	3.81601	-0.0540274	0.907343	unknown protein
AT1G02960.2	161	178	187	222	223	178	3.86182	-0.0266023	1	unknown protein
AT1G02960.3	162	179	179	221	235	178	3.86953	0.0150867	1	unknown protein
AT1G02965.1	1	0	0	0	0	0	-2.68607	-1.97831	1	unknown protein
AT1G02970.1	67	73	74	61	71	72	2.50513	-0.335875	0.118941	WEE1 kinase homolog
AT1G02980.1	1	1	0	2	3	2	-1.65105	1.39454	0.596056	cullin 2
AT1G02990.1	308	303	349	372	359	315	4.70574	-0.146309	0.282979	unknown protein
AT1G02990.2	311	312	353	385	371	322	4.73329	-0.126654	0.367608	unknown protein
AT1G02990.3	319	319	358	393	375	329	4.75858	-0.130388	0.33413	unknown protein
AT1G03000.1	356	377	365	474	521	391	4.97825	0.0645476	0.768181	peroxin 6
AT1G03010.1	20	12	17	18	25	21	0.522992	0.115507	1	Phototropic-responsive NPH3 family protein
AT1G03020.1	1	1	2	1	2	1	-0.107458	-0.247306	1	Thioredoxin superfamily protein
AT1G03030.1	164	171	165	226	247	186	3.85584	0.128722	0.465416	P-loop containing nucleoside triphosphate hydrolases superfamily protein
AT1G03040.1	370	441	403	515	573	467	5.2452	0.0887187	0.522379	basic helix-loop-helix (bHLH) DNA-binding superfamily protein
AT1G03040.2	349	408	379	484	552	436	5.17153	0.104578	0.42491	basic helix-loop-helix (bHLH) DNA-binding superfamily protein
AT1G03050.1	0	0	1	0	0	0	-2.24427	-1.9788	1	ENTH/ANTH/VHS superfamily protein
AT1G03055.1	85	129	78	124	95	77	3.24904	-0.245456	0.327047	unknown protein
AT1G03055.2	84	121	72	117	98	71	3.13338	-0.220761	0.368816	unknown protein
AT1G03060.1	1173	1152	1167	1090	1049	931	6.2357	-0.454676	4.88e-05	Beige/BEACH domain ;WD domain, G-beta repeat protein
AT1G03070.1	23	23	21	24	26	30	1.14015	-0.00596137	1	Bax inhibitor-1 family protein
AT1G03070.2	20	22	19	25	25	30	1.08329	0.128235	0.97217	Bax inhibitor-1 family protein
AT1G03080.1	1260	1085	1302	1350	1226	1033	6.49019	-0.29044	0.00780717	kinase interacting (KIP1-like) family protein
AT1G03090.1	267	293	273	611	468	541	4.48089	0.700745	2.3e-08	methylcrotonyl-CoA carboxylase alpha chain, mitochondrial / 3-methylcrotonyl-CoA carboxylase 1 (MCCA)
AT1G03090.2	280	308	283	639	492	571	4.54503	0.708234	1.6e-08	methylcrotonyl-CoA carboxylase alpha chain, mitochondrial / 3-methylcrotonyl-CoA carboxylase 1 (MCCA)
AT1G03100.1	54	50	42	57	57	50	2.03812	-0.0997153	0.893663	Pentatricopeptide repeat (PPR) superfamily protein
AT1G03106.1	0	1	1	0	1	0	-1.24485	-1.01049	1	unknown protein
AT1G03110.1	270	260	264	307	312	277	4.36185	-0.09391	0.69042	Transducin/WD40 repeat-like superfamily protein
AT1G03120.1	3	5	2	6	5	7	-0.922855	0.568252	0.684783	responsive to abscisic acid 28
AT1G03130.1	10387	12986	10546	14989	18077	13131	9.99014	0.175275	0.0402375	photosystem I subunit D-2
AT1G03140.1	541	544	506	732	717	600	5.38764	0.0961056	0.421575	splicing factor Prp18 family protein
AT1G03150.1	207	223	201	289	303	243	4.2191	0.135333	0.360097	Acyl-CoA N-acyltransferases (NAT) superfamily protein
AT1G03160.1	728	904	813	834	906	665	5.99586	-0.295356	0.000604661	FZO-like
AT1G03160.2	699	857	786	807	865	641	5.92794	-0.289626	0.000905249	FZO-like
AT1G03170.1	8	6	9	3	4	5	0.849082	-1.17967	0.142996	Protein of unknown function (DUF3049)
AT1G03180.1	46	41	55	64	61	47	2.02712	0.00460349	1	unknown protein
AT1G03180.2	48	48	60	69	64	47	2.10089	-0.0655501	0.984229	unknown protein
AT1G03190.1	150	134	141	174	200	140	3.63645	0.0013916	1	RAD3-like DNA-binding helicase protein
AT1G03190.2	139	131	135	171	192	135	3.5863	0.0257869	1	RAD3-like DNA-binding helicase protein
AT1G03200.1	18	21	21	31	25	24	0.9622	0.146495	0.916215	unknown protein
AT1G03210.1	172	132	141	191	193	194	3.61318	0.11092	0.649412	Phenazine biosynthesis PhzC/PhzF protein
AT1G03220.1	3384	1881	2578	3759	2977	4316	7.54611	0.240891	0.476312	Eukaryotic aspartyl protease family protein
AT1G03230.1	611	413	498	718	651	699	5.12126	0.177196	0.417205	Eukaryotic aspartyl protease family protein
AT1G03240.1	1	3	1	1	2	2	-1.50217	-0.244237	1	unknown protein
AT1G03250.1	247	315	285	334	385	263	4.69589	-0.0581012	0.806967	unknown protein
AT1G03250.2	230	295	270	317	360	246	4.6056	-0.0563614	0.823049	unknown protein
AT1G03260.1	97	112	95	135	143	119	3.08626	0.11683	0.616611	SNARE associated Golgi protein family
AT1G03270.1	73	66	54	78	64	72	2.28335	-0.112221	0.901639	CBS domain-containing protein with a domain of unknown function (DUF21)
AT1G03280.1	507	490	481	594	604	511	5.38602	-0.0598353	0.794575	Transcription factor TFIIE, alpha subunit
AT1G03290.1	312	277	308	342	347	292	4.73167	-0.141792	0.376939	unknown protein
AT1G03290.2	334	289	323	368	376	313	4.83472	-0.111359	0.534091	unknown protein
AT1G03300.1	48	78	62	134	140	160	2.52854	0.949584	1.15e-06	DOMAIN OF UNKNOWN FUNCTION 724 1
AT1G03310.1	1034	1257	1051	822	1033	665	6.34206	-0.682089	2.15e-13	debranching enzyme 1
AT1G03310.2	1038	1256	1061	830	1038	665	6.35353	-0.68077	6.26e-13	debranching enzyme 1
AT1G03320.1	1	6	1	4	3	2	-1.43332	-0.0917396	1	unknown protein
AT1G03330.1	296	283	313	450	482	358	4.78276	0.258277	0.0347249	Small nuclear ribonucleoprotein family protein
AT1G03340.1	34	32	28	27	33	30	1.3917	-0.328084	0.487222	unknown protein
AT1G03350.1	579	532	576	642	681	543	5.45231	-0.126897	0.30045	BSD domain-containing protein
AT1G03360.1	184	200	178	246	247	220	3.95042	0.07655	0.791549	ribosomal RNA processing 4
AT1G03365.1	282	294	252	285	287	234	4.39065	-0.307004	0.00207942	RING/U-box superfamily protein
AT1G03370.1	372	304	327	432	356	443	4.72597	0.0368015	0.987043	C2 calcium/lipid-binding and GRAM domain containing protein
AT1G03380.1	687	669	626	783	759	632	5.80395	-0.136009	0.229122	homolog of yeast autophagy 18 (ATG18) G
AT1G03390.1	0	0	0	1	0	0	-1.77857	1.78036	1	HXXXD-type acyl-transferase family protein
AT1G03400.1	195	194	176	193	226	237	4.05925	-0.0454933	0.985952	2-oxoglutarate (2OG) and Fe(II)-dependent oxygenase superfamily protein
AT1G03410.1	340	343	318	471	487	389	5.09424	0.158945	0.14488	2-oxoglutarate (2OG) and Fe(II)-dependent oxygenase superfamily protein
AT1G03430.1	150	165	145	174	197	165	3.9917	-0.0473848	0.930223	histidine-containing phosphotransfer factor 5
AT1G03440.1	254	337	290	252	248	275	4.67315	-0.444052	0.000641435	Leucine-rich repeat (LRR) family protein
AT1G03445.1	7	6	5	1	11	4	-0.965414	-0.435536	0.757289	Serine/threonine protein phosphatase family protein
AT1G03457.1	90	102	93	191	181	273	3.14411	0.932423	1.92e-06	RNA-binding (RRM/RBD/RNP motifs) family protein
AT1G03457.2	86	100	90	186	178	263	3.10697	0.936996	1.43e-06	RNA-binding (RRM/RBD/RNP motifs) family protein
AT1G03470.1	39	47	49	78	77	81	2.05544	0.537302	0.00697687	Kinase interacting (KIP1-like) family protein
AT1G03470.2	36	46	49	78	76	80	2.04548	0.568465	0.00510521	Kinase interacting (KIP1-like) family protein
AT1G03475.1	1883	2635	2029	2478	3131	2117	7.32133	-0.0326241	0.946461	Coproporphyrinogen III oxidase
AT1G03490.1	1	0	0	0	0	0	-2.66833	-1.9783	1	NAC domain containing protein 6
AT1G03495.1	146	143	149	193	119	92	3.95572	-0.392421	0.112439	HXXXD-type acyl-transferase family protein
AT1G03510.1	17	23	11	20	24	12	0.76899	-0.133841	0.976028	Tetratricopeptide repeat (TPR)-like superfamily protein
AT1G03520.1	118	130	111	173	171	142	3.43612	0.168698	0.368587	Core-2/I-branching beta-1,6-N-acetylglucosaminyltransferase family protein
AT1G03520.2	83	87	83	124	117	102	2.97397	0.17067	0.508162	Core-2/I-branching beta-1,6-N-acetylglucosaminyltransferase family protein
AT1G03530.1	255	264	246	272	230	258	4.29282	-0.271463	0.0676347	nuclear assembly factor 1
AT1G03540.1	37	26	39	34	23	24	1.23013	-0.600173	0.0678276	Pentatricopeptide repeat (PPR-like) superfamily protein
AT1G03550.1	111	83	118	158	145	132	3.34611	0.207568	0.412808	Secretory carrier membrane protein (SCAMP) family protein
AT1G03560.1	152	136	127	201	172	134	3.59686	0.01785	1	Pentatricopeptide repeat (PPR-like) superfamily protein
AT1G03580.1	0	1	3	9	7	12	-0.94399	2.44618	0.00371838	pseudogene
AT1G03590.1	269	307	277	438	417	395	4.51606	0.285863	0.00807793	Protein phosphatase 2C family protein
AT1G03600.1	4525	5878	4510	5550	7096	4961	8.73625	-0.0306772	0.925836	photosystem II family protein
AT1G03610.1	217	285	230	405	433	386	4.61414	0.476564	2.6e-06	Protein of unknown function (DUF789)
AT1G03620.1	20	20	18	40	45	41	0.936548	0.849889	0.0247191	ELMO/CED-12 family protein
AT1G03630.1	2857	3504	2841	3154	4213	2834	7.93333	-0.124409	0.195641	protochlorophyllide oxidoreductase C
AT1G03630.2	2701	3349	2704	2977	3986	2676	7.8582	-0.134076	0.158669	protochlorophyllide oxidoreductase C
AT1G03650.1	18	23	17	30	40	40	1.10357	0.65835	0.10292	Acyl-CoA N-acyltransferases (NAT) superfamily protein
AT1G03660.1	8	12	8	15	7	11	-0.447756	-0.0243035	1	Ankyrin-repeat containing protein
AT1G03670.1	0	0	1	0	0	0	-2.61655	-1.97956	1	ankyrin repeat family protein
AT1G03680.1	2580	3059	2516	3232	3925	2855	7.89262	0.0252805	0.962778	thioredoxin M-type 1
AT1G03687.1	171	164	174	230	210	209	3.8729	0.0835098	0.733451	DTW domain-containing protein
AT1G03687.2	154	154	157	210	177	192	3.7016	0.0515492	0.922785	DTW domain-containing protein
AT1G03700.1	54	18	9	38	29	32	1.07021	0.0295024	1	Uncharacterised protein family (UPF0497)
AT1G03710.1	0	14	5	5	4	7	-0.616329	-0.47885	0.878051	Cystatin/monellin superfamily protein
AT1G03710.2	0	10	3	2	3	6	-0.86614	-0.464122	0.897081	Cystatin/monellin superfamily protein
AT1G03720.1	0	0	1	0	0	0	-2.63355	-1.98024	1	Cysteine proteinases superfamily protein
AT1G03730.1	70	59	71	101	94	76	2.87849	0.168082	0.572849	unknown protein
AT1G03740.1	375	337	346	478	414	446	4.94463	0.0754116	0.754032	Protein kinase superfamily protein
AT1G03740.2	360	324	332	455	393	432	4.8839	0.0706364	0.791263	Protein kinase superfamily protein
AT1G03750.1	82	83	92	105	94	100	2.88058	-0.0477874	1	switch 2
AT1G03760.1	88	72	74	123	118	109	2.88249	0.312704	0.19131	Prefoldin chaperone subunit family protein
AT1G03770.1	95	63	78	113	106	102	2.79544	0.174739	0.59581	RING 1B
AT1G03770.2	93	60	74	107	97	94	2.67429	0.123512	0.800183	RING 1B
AT1G03770.3	92	60	75	106	93	93	2.68747	0.094603	0.886123	RING 1B
AT1G03780.1	147	168	189	197	269	206	3.53846	0.142493	0.588682	targeting protein for XKLP2
AT1G03780.2	218	227	237	247	357	263	3.96804	0.0734189	0.85477	targeting protein for XKLP2
AT1G03780.3	208	220	227	233	336	239	3.88199	0.0289948	1	targeting protein for XKLP2
AT1G03790.1	1	1	0	1	0	0	-1.59104	-0.995381	1	Zinc finger C-x8-C-x5-C-x3-H type family protein
AT1G03800.1	6	11	6	9	13	12	-0.650707	0.294821	0.832467	ERF domain protein 10
AT1G03810.1	0	0	0	0	0	0	-2.72207	0	1	Nucleic acid-binding, OB-fold-like protein
AT1G03820.1	393	346	336	439	424	374	4.65482	-0.0658713	0.813781	unknown protein
AT1G03830.1	225	181	201	248	222	195	3.95524	-0.138433	0.46172	guanylate-binding family protein
AT1G03830.2	235	201	210	260	235	208	4.02689	-0.147198	0.39763	guanylate-binding family protein
AT1G03840.1	69	46	64	91	67	58	2.08684	-0.00323767	1	C2H2 and C2HC zinc fingers superfamily protein
AT1G03840.2	56	44	61	80	60	51	1.97602	-0.0268534	1	C2H2 and C2HC zinc fingers superfamily protein
AT1G03850.1	133	75	87	246	196	280	3.27533	1.03769	5.05e-06	Glutaredoxin family protein
AT1G03850.2	167	87	110	290	252	367	3.58531	1.06817	1.07e-06	Glutaredoxin family protein
AT1G03860.1	837	843	847	1100	1215	958	5.98811	0.101629	0.354648	prohibitin 2
AT1G03860.2	765	802	785	1036	1122	891	5.89569	0.103513	0.366558	prohibitin 2
AT1G03860.3	759	780	775	985	1116	866	5.87241	0.0869448	0.479415	prohibitin 2
AT1G03870.1	1262	1112	1063	2251	1618	4756	6.50659	1.11941	2.94e-06	FASCICLIN-like arabinoogalactan 9
AT1G03880.1	0	0	1	0	0	0	-2.59912	-1.9858	1	cruciferin 2
AT1G03890.1	0	0	0	0	0	0	-2.61632	0	1	RmlC-like cupins superfamily protein
AT1G03900.1	836	709	789	1073	1051	935	6.02535	0.120087	0.289687	non-intrinsic ABC protein 4
AT1G03905.1	69	44	57	75	65	68	2.24447	0.0229921	1	P-loop containing nucleoside triphosphate hydrolases superfamily protein
AT1G03910.1	671	683	673	776	761	647	5.65953	-0.161813	0.153857	unknown protein
AT1G03910.2	704	717	715	814	820	701	5.76936	-0.140745	0.210394	unknown protein
AT1G03920.1	58	56	50	90	67	61	2.17407	0.142473	0.778797	Protein kinase family protein
AT1G03930.1	485	539	481	545	568	480	5.45946	-0.185547	0.0881828	dual specificity kinase 1
AT1G03940.1	135	125	141	172	123	96	3.90203	-0.312316	0.243448	HXXXD-type acyl-transferase family protein
AT1G03950.1	139	125	132	175	173	143	3.52446	0.041092	0.980522	vacuolar protein sorting-associated protein 2.3
AT1G03960.1	147	141	132	153	171	135	3.68782	-0.140705	0.474693	Calcium-binding EF hand family protein
AT1G03960.2	147	137	135	152	173	140	3.69654	-0.118422	0.561561	Calcium-binding EF hand family protein
AT1G03970.1	192	205	191	260	265	224	4.05702	0.0808165	0.753269	G-box binding factor 4
AT1G03980.1	127	141	128	159	161	139	3.43379	-0.0547929	0.928613	phytochelatin synthase 2
AT1G03982.1	0	0	0	0	0	0	-2.72212	0	1	PAK-box/P21-Rho-binding family protein
AT1G03990.1	37	31	34	29	29	22	1.44646	-0.617706	0.0535463	Long-chain fatty alcohol dehydrogenase family protein
AT1G04000.1	92	85	104	131	173	126	3.38866	0.341147	0.0686047	unknown protein
AT1G04010.1	170	148	131	173	188	153	3.60422	-0.0735356	0.82964	phospholipid sterol acyl transferase 1
AT1G04020.1	219	244	207	198	223	192	3.98985	-0.394782	0.00163518	breast cancer associated RING 1
AT1G04020.2	218	240	206	203	225	195	4.0006	-0.358417	0.0067672	breast cancer associated RING 1
AT1G04030.1	269	212	239	373	399	396	4.09486	0.432288	0.00130575	unknown protein
AT1G04040.1	1394	1078	1192	1964	2068	2495	6.4034	0.578421	9.81e-05	HAD superfamily, subfamily IIIB acid phosphatase
AT1G04050.1	63	62	70	78	82	63	2.53378	-0.0770258	0.916757	homolog of SU(var)3-9 1
AT1G04070.1	112	76	90	109	116	108	3.04022	-0.00837723	1	translocase of outer membrane 22-I
AT1G04080.1	1385	1398	1354	1641	1637	1432	6.81934	-0.080956	0.385296	Tetratricopeptide repeat (TPR)-like superfamily protein
AT1G04080.2	1013	992	954	1192	1238	1039	6.40359	-0.0396752	0.796327	Tetratricopeptide repeat (TPR)-like superfamily protein
AT1G04080.3	1387	1389	1352	1632	1622	1415	6.81341	-0.0906558	0.316708	Tetratricopeptide repeat (TPR)-like superfamily protein
AT1G04090.1	15	13	11	8	13	7	-0.0563507	-0.740493	0.24608	Plant protein of unknown function (DUF946)
AT1G04100.1	35	29	38	39	53	41	1.89812	0.110057	0.94696	indoleacetic acid-induced protein 10
AT1G04110.1	109	148	136	90	139	90	2.84804	-0.57436	0.0134196	Subtilase family protein
AT1G04120.1	1761	1508	1568	1736	1542	1551	6.81371	-0.267379	0.019713	multidrug resistance-associated protein 5
AT1G04120.2	1731	1469	1544	1700	1493	1515	6.77594	-0.275956	0.0177372	multidrug resistance-associated protein 5
AT1G04130.1	122	145	125	166	178	134	3.48577	0.016814	1	Tetratricopeptide repeat (TPR)-like superfamily protein
AT1G04140.1	1238	1215	1135	1473	1400	1299	6.5438	-0.0482409	0.749426	Transducin family protein / WD-40 repeat family protein
AT1G04140.2	1202	1181	1097	1415	1348	1244	6.49773	-0.0624387	0.626315	Transducin family protein / WD-40 repeat family protein
AT1G04150.1	8	4	10	15	9	4	-0.425377	0.0680281	1	C2 calcium/lipid-binding plant phosphoribosyltransferase family protein
AT1G04160.1	253	234	243	271	259	205	4.21345	-0.261021	0.0436214	myosin XI B
AT1G04170.1	1769	1807	1661	1787	2000	1673	6.95819	-0.207843	0.00236275	eukaryotic translation initiation factor 2 gamma subunit
AT1G04180.1	48	13	33	17	28	36	1.04426	-0.478341	0.412066	YUCCA 9
AT1G04190.1	471	406	463	548	639	496	5.24403	0.0551389	0.835484	Tetratricopeptide repeat (TPR)-like superfamily protein
AT1G04200.1	372	366	342	444	433	438	4.83463	0.0199175	1	unknown protein
AT1G04210.1	768	833	780	995	906	837	5.92109	-0.0646783	0.660106	Leucine-rich repeat protein kinase family protein
AT1G04220.1	391	225	202	349	320	245	4.61145	-0.114519	0.796638	3-ketoacyl-CoA synthase 2
AT1G04230.1	123	129	146	188	170	147	3.4684	0.0745313	0.808994	Protein of unknown function (DUF2361)
AT1G04240.1	274	285	238	494	503	555	4.89477	0.705449	5.96e-08	AUX/IAA transcriptional regulator family protein
AT1G04250.1	1001	904	879	1141	1228	946	6.17191	-0.0214634	1	AUX/IAA transcriptional regulator family protein
AT1G04260.1	157	131	122	190	183	142	3.50794	0.0588829	0.913423	CAMV movement protein interacting protein 7
AT1G04270.1	4588	4628	4589	5490	6241	5051	8.41259	0.0105914	1	cytosolic ribosomal protein S15
AT1G04270.2	3868	3892	3802	4609	5269	4302	8.16769	0.0241482	0.978588	cytosolic ribosomal protein S15
AT1G04280.1	469	320	370	502	479	493	4.92029	0.08107	0.823678	P-loop containing nucleoside triphosphate hydrolases superfamily protein
AT1G04290.1	290	302	259	272	315	264	4.56298	-0.266503	0.130556	Thioesterase superfamily protein
AT1G04300.1	748	768	716	1001	963	866	5.98726	0.0757384	0.586221	TRAF-like superfamily protein
AT1G04300.2	713	754	701	979	935	852	5.959	0.085208	0.51426	TRAF-like superfamily protein
AT1G04300.3	730	756	705	989	944	856	5.96971	0.0816675	0.542193	TRAF-like superfamily protein
AT1G04300.4	726	751	699	973	923	834	5.94891	0.060602	0.71663	TRAF-like superfamily protein
AT1G04310.1	94	70	78	83	98	67	2.76361	-0.239961	0.472724	ethylene response sensor 2
AT1G04330.1	16	15	13	34	11	13	0.627527	0.129832	0.980241	unknown protein
AT1G04340.1	231	197	244	283	319	287	4.18831	0.134136	0.452833	HR-like lesion-inducing protein-related
AT1G04350.1	708	836	680	859	934	678	6.08263	-0.118587	0.317833	2-oxoglutarate (2OG) and Fe(II)-dependent oxygenase superfamily protein
AT1G04360.1	66	39	56	89	82	49	2.33703	0.168687	0.768258	RING/U-box superfamily protein
AT1G04370.1	3	2	1	4	1	4	-1.88619	0.318601	1	Ethylene-responsive element binding factor 14
AT1G04380.1	4	3	1	0	2	1	-1.66825	-1.5583	0.407491	2-oxoglutarate (2OG) and Fe(II)-dependent oxygenase superfamily protein
AT1G04390.1	140	140	113	154	132	111	3.42469	-0.253042	0.17923	BTB/POZ domain-containing protein
AT1G04400.1	1376	1392	1312	2042	2151	1667	6.85497	0.250174	0.00356442	cryptochrome 2
AT1G04400.2	1295	1301	1249	1920	2063	1588	6.77779	0.262373	0.00148646	cryptochrome 2
AT1G04410.1	9714	8806	8496	11460	12607	10969	9.34578	0.107388	0.202367	Lactate/malate dehydrogenase family protein
AT1G04420.1	1294	1754	1299	1761	2104	1305	6.71898	-0.024525	1	NAD(P)-linked oxidoreductase superfamily protein
AT1G04430.1	1669	1538	1432	2120	2027	2340	6.87423	0.228834	0.0320534	S-adenosyl-L-methionine-dependent methyltransferases superfamily protein
AT1G04430.2	1604	1466	1361	2016	1939	2229	6.8121	0.2258	0.0328453	S-adenosyl-L-methionine-dependent methyltransferases superfamily protein
AT1G04440.1	696	585	580	847	863	781	5.66891	0.153181	0.208633	casein kinase like 13
AT1G04445.1	0	1	3	1	0	5	-2.24387	0.321261	1	C2H2-like zinc finger protein
AT1G04457.1	25	45	31	30	51	23	1.13502	-0.229111	0.632001	pseudogene
AT1G04470.1	0	0	0	0	0	0	-2.61659	0	1	Protein of unknown function (DUF810)
AT1G04480.1	2029	2129	2124	2824	3130	2575	7.3355	0.17065	0.119302	Ribosomal protein L14p/L23e family protein
AT1G04490.1	22	16	22	46	28	25	0.698345	0.448992	0.332276	Protein of unknown function (DUF3527)
AT1G04490.2	21	16	23	49	28	26	0.721864	0.5057	0.271762	Protein of unknown function (DUF3527)
AT1G04500.1	4	5	2	11	2	1	-1.7774	0.0728084	1	CCT motif family protein
AT1G04510.1	765	834	886	950	978	845	5.98887	-0.111547	0.349198	MOS4-associated complex 3A
AT1G04510.2	744	821	871	923	940	830	5.95543	-0.124322	0.293709	MOS4-associated complex 3A
AT1G04520.1	415	405	426	391	451	358	4.94017	-0.325031	0.000631084	plasmodesmata-located protein 2
AT1G04530.1	1121	1420	1139	1110	1277	940	6.65713	-0.414932	8.7e-05	Tetratricopeptide repeat (TPR)-like superfamily protein
AT1G04540.1	61	43	47	46	61	44	1.95319	-0.270511	0.442126	Calcium-dependent lipid-binding (CaLB domain) family protein
AT1G04550.1	285	335	291	348	351	287	4.76435	-0.153955	0.306176	AUX/IAA transcriptional regulator family protein
AT1G04550.2	347	400	352	411	398	320	4.99286	-0.230029	0.0578907	AUX/IAA transcriptional regulator family protein
AT1G04555.1	48	54	53	78	61	56	2.24811	0.0629087	0.978976	unknown protein
AT1G04560.1	0	4	0	1	0	0	-1.3536	-1.86711	0.756812	AWPM-19-like family protein
AT1G04570.1	35	32	26	13	12	7	1.48128	-1.79491	2.96e-08	Major facilitator superfamily protein
AT1G04580.1	1	2	1	1	0	2	-1.8061	-0.597912	1	aldehyde oxidase 4
AT1G04590.1	285	312	321	402	401	360	4.71914	0.0732997	0.757589	unknown protein
AT1G04590.2	273	289	301	381	376	335	4.6163	0.0710899	0.772703	unknown protein
AT1G04600.1	9	12	11	17	15	21	0.111625	0.457335	0.42429	myosin XI A
AT1G04610.1	48	31	62	52	50	49	1.67105	-0.176275	0.823623	YUCCA 3
AT1G04620.1	215	241	196	234	333	217	3.81414	-0.00569132	1	coenzyme F420 hydrogenase family / dehydrogenase, beta subunit family
AT1G04625.1	3	1	0	2	0	1	-1.99254	-0.609899	1	Polynucleotidyl transferase, ribonuclease H-like superfamily protein
AT1G04630.1	506	510	505	625	680	523	5.37645	-0.00672812	1	GRIM-19 protein
AT1G04635.1	34	32	30	35	52	29	1.57117	0.0016634	1	ribonuclease P family protein / Rpp14 family protein
AT1G04640.1	325	402	306	449	494	395	4.80212	0.106376	0.471695	lipoyltransferase 2
AT1G04640.2	272	326	246	360	398	321	4.55385	0.0878321	0.659986	lipoyltransferase 2
AT1G04645.1	0	0	0	0	0	0	-2.36801	0	1	Plant self-incompatibility protein S1 family
AT1G04650.1	65	61	57	72	65	39	2.56774	-0.327602	0.205222	unknown protein
AT1G04660.1	8	11	4	6	17	7	-0.00533071	0.109734	1	glycine-rich protein
AT1G04670.1	0	0	0	0	0	0	-2.63372	0	1	unknown protein
AT1G04680.1	1430	1393	1294	1666	1610	1734	6.61224	0.0247301	0.981205	Pectin lyase-like superfamily protein
AT1G04690.1	1150	1038	1009	1199	1295	947	6.41795	-0.16814	0.0592226	potassium channel beta subunit 1
AT1G04700.1	51	42	40	56	66	59	1.81506	0.176022	0.628315	PB1 domain-containing protein tyrosine kinase
AT1G04710.1	379	400	391	451	538	354	5.02707	-0.0755241	0.65108	peroxisomal 3-ketoacyl-CoA thiolase 4
AT1G04730.1	126	126	120	170	160	122	3.32355	0.0112324	1	P-loop containing nucleoside triphosphate hydrolases superfamily protein
AT1G04750.1	888	832	888	1177	1235	1087	6.25956	0.154912	0.0675119	vesicle-associated membrane protein 721
AT1G04750.2	658	647	663	900	955	846	5.88694	0.188679	0.0297463	vesicle-associated membrane protein 721
AT1G04760.1	28	32	16	23	29	25	1.11357	-0.246248	0.67721	vesicle-associated membrane protein 726
AT1G04770.1	405	437	514	510	403	503	5.28026	-0.197063	0.34224	Tetratricopeptide repeat (TPR)-like superfamily protein
AT1G04778.1	5	2	1	3	4	1	-1.00995	-0.25733	1	unknown protein
AT1G04780.1	588	517	578	780	714	648	5.52399	0.0778978	0.681315	Ankyrin repeat family protein
AT1G04790.1	295	294	283	362	383	336	4.62864	0.0420421	0.887042	RING/U-box superfamily protein
AT1G04800.1	583	751	752	963	1096	787	5.91747	0.172591	0.323396	glycine-rich protein
AT1G04810.1	867	813	876	1045	1011	893	5.94716	-0.0637455	0.738593	26S proteasome regulatory complex, non-ATPase subcomplex, Rpn2/Psmd1 subunit
AT1G04820.1	6292	5873	5835	7173	7761	6488	9.00487	-0.0192269	0.99509	tubulin alpha-4 chain
AT1G04830.1	189	176	184	260	269	206	4.01238	0.149567	0.40206	Ypt/Rab-GAP domain of gyp1p superfamily protein
AT1G04830.2	180	157	169	232	242	192	3.84854	0.125529	0.541319	Ypt/Rab-GAP domain of gyp1p superfamily protein
AT1G04840.1	14	6	11	12	17	19	0.484789	0.36082	0.69904	Tetratricopeptide repeat (TPR)-like superfamily protein
AT1G04850.1	1417	1219	1310	1724	1674	1402	6.70072	0.00997012	1	ubiquitin-associated (UBA)/TS-N domain-containing protein
AT1G04860.1	566	587	555	606	566	487	5.35407	-0.310527	0.000414231	ubiquitin-specific protease 2
AT1G04870.1	443	366	435	542	527	491	4.9739	0.0569288	0.852873	protein arginine methyltransferase 10
AT1G04870.2	470	389	456	566	550	521	5.04958	0.047104	0.911339	protein arginine methyltransferase 10
AT1G04880.1	10	14	13	9	8	11	-0.224303	-0.658898	0.329225	HMG (high mobility group) box protein with ARID/BRIGHT DNA-binding domain
AT1G04900.1	192	156	161	190	202	199	3.71974	-0.0507659	0.953117	Protein of unknown function (DUF185)
AT1G04910.1	397	352	362	459	449	421	4.9477	-0.00893743	1	O-fucosyltransferase family protein
AT1G04920.1	31	39	26	49	40	40	1.57373	0.159222	0.767179	sucrose phosphate synthase 3F
AT1G04930.1	54	42	36	68	49	33	2.04037	-0.086645	0.969281	hydroxyproline-rich glycoprotein family protein
AT1G04930.2	48	39	33	62	48	31	1.94799	-0.0387488	1	hydroxyproline-rich glycoprotein family protein
AT1G04940.1	740	867	726	913	1147	770	5.98445	0.00492002	1	translocon at the inner envelope membrane of chloroplasts 20
AT1G04945.1	88	97	89	82	115	77	2.88203	-0.270344	0.219867	HIT-type Zinc finger family protein
AT1G04945.2	102	106	96	93	125	84	3.04524	-0.279715	0.163661	HIT-type Zinc finger family protein
AT1G04945.3	675	783	670	800	999	691	5.82837	-0.0463479	0.889639	HIT-type Zinc finger family protein
AT1G04950.1	245	262	235	343	372	287	4.47505	0.164258	0.158064	TATA BOX ASSOCIATED FACTOR II 59
AT1G04950.2	249	268	236	347	371	292	4.48568	0.154772	0.201662	TATA BOX ASSOCIATED FACTOR II 59
AT1G04950.3	248	264	236	348	376	293	4.49393	0.174188	0.129816	TATA BOX ASSOCIATED FACTOR II 59
AT1G04960.1	272	274	251	386	321	297	4.48069	0.0660536	0.805125	Protein of unknown function (DUF1664)
AT1G04960.2	258	255	242	366	309	281	4.41512	0.072716	0.770604	Protein of unknown function (DUF1664)
AT1G04970.1	447	365	360	530	494	422	5.02035	0.0333448	0.962778	lipid-binding serum glycoprotein family protein
AT1G04970.2	344	294	278	405	393	330	4.69684	0.0310847	0.983554	lipid-binding serum glycoprotein family protein
AT1G04980.1	277	238	252	330	308	297	4.18119	0.0186577	1	PDI-like 2-2
AT1G04985.1	341	317	299	455	466	436	4.83689	0.23743	0.0187381	unknown protein
AT1G04990.1	255	217	215	338	291	228	4.05157	0.0460891	0.966343	Zinc finger C-x8-C-x5-C-x3-H type family protein
AT1G04990.2	238	207	201	324	278	220	3.98659	0.0754027	0.838706	Zinc finger C-x8-C-x5-C-x3-H type family protein
AT1G05000.1	175	70	108	152	141	153	3.30573	0.0686539	0.982183	Phosphotyrosine protein phosphatases superfamily protein
AT1G05000.2	161	63	99	143	127	140	3.19563	0.075352	0.97088	Phosphotyrosine protein phosphatases superfamily protein
AT1G05010.1	1999	2269	2214	2320	2175	2475	7.42956	-0.150878	0.411835	ethylene-forming enzyme
AT1G05020.1	5	12	9	16	14	24	0.234621	0.790716	0.18306	ENTH/ANTH/VHS superfamily protein
AT1G05030.1	148	148	120	139	173	152	3.66263	-0.109244	0.649291	Major facilitator superfamily protein
AT1G05040.1	0	0	0	0	0	0	-2.63358	0	1	unknown protein
AT1G05040.2	0	0	0	0	0	0	-2.61654	0	1	unknown protein
AT1G05055.1	183	218	195	199	241	182	3.9222	-0.207383	0.142829	general transcription factor II H2
AT1G05060.1	175	134	155	243	176	193	3.9548	0.133164	0.706795	unknown protein
AT1G05061.1	10	3	5	8	6	2	-0.901757	-0.433103	0.731409	pseudogene
AT1G05065.1	8	5	4	3	4	3	-0.467757	-1.00461	0.360447	CLAVATA3/ESR-RELATED 20
AT1G05070.1	180	182	220	247	225	207	4.27145	-0.0472629	0.936416	Protein of unknown function (DUF1068)
AT1G05080.1	0	0	0	0	0	0	-2.70405	0	1	F-box/RNI-like/FBD-like domains-containing protein
AT1G05090.1	328	318	317	414	451	365	4.77472	0.0831093	0.64478	dentin sialophosphoprotein-related
AT1G05100.1	13	11	12	21	13	13	0.428487	0.114801	1	mitogen-activated protein kinase kinase kinase 18
AT1G05120.1	364	327	342	409	403	341	4.82147	-0.11164	0.493466	Helicase protein with RING/U-box domain
AT1G05135.1	29	64	49	49	42	112	2.78004	0.293193	0.542193	pseudogene
AT1G05136.1	0	0	0	0	0	0	-2.70404	0	1	unknown protein
AT1G05140.1	749	949	779	872	989	656	6.08991	-0.250226	0.0100128	Peptidase M50 family protein
AT1G05150.1	635	688	574	761	728	674	5.51093	-0.0740295	0.743294	Calcium-binding tetratricopeptide family protein
AT1G05160.1	112	122	136	132	133	105	3.43524	-0.270054	0.12509	cytochrome P450, family 88, subfamily A, polypeptide 3
AT1G05170.1	297	325	268	229	219	137	4.63171	-0.87696	1.34e-16	Galactosyltransferase family protein
AT1G05170.2	311	324	272	234	224	142	4.64689	-0.86764	2.7e-17	Galactosyltransferase family protein
AT1G05180.1	449	396	444	602	531	492	5.10499	0.0649095	0.749988	NAD(P)-binding Rossmann-fold superfamily protein
AT1G05180.2	384	355	392	521	478	437	4.94178	0.0754844	0.66081	NAD(P)-binding Rossmann-fold superfamily protein
AT1G05180.3	359	343	381	495	453	414	4.85495	0.0617632	0.75486	NAD(P)-binding Rossmann-fold superfamily protein
AT1G05190.1	3440	4755	3561	4802	6014	4166	8.31545	0.0798589	0.59762	Ribosomal protein L6 family
AT1G05200.1	541	534	466	505	542	453	5.56358	-0.306606	0.000807547	glutamate receptor 3.4
AT1G05200.2	549	546	482	514	548	460	5.58564	-0.318954	0.000404185	glutamate receptor 3.4
AT1G05205.1	279	241	264	413	420	344	4.47473	0.314958	0.00668946	unknown protein
AT1G05210.1	95	57	69	103	116	98	2.59148	0.249522	0.36401	Transmembrane protein 97, predicted
AT1G05220.1	18	6	10	19	18	11	-0.127372	0.219974	0.958789	Transmembrane protein 97, predicted
AT1G05220.2	24	20	21	27	35	28	0.923802	0.199817	0.801799	Transmembrane protein 97, predicted
AT1G05230.1	204	294	250	272	309	244	4.35985	-0.126368	0.540858	homeodomain GLABROUS 2
AT1G05230.2	212	301	256	279	314	249	4.39427	-0.136875	0.453572	homeodomain GLABROUS 2
AT1G05230.3	191	291	239	263	303	242	4.31842	-0.10239	0.680333	homeodomain GLABROUS 2
AT1G05230.4	212	299	258	280	317	249	4.39382	-0.130463	0.49643	homeodomain GLABROUS 2
AT1G05240.1	256	214	375	361	309	559	4.17173	0.293418	0.532615	Peroxidase superfamily protein
AT1G05250.1	256	214	375	362	309	559	4.17323	0.294538	0.529423	Peroxidase superfamily protein
AT1G05260.1	708	361	589	969	829	871	5.53102	0.413954	0.0742876	Peroxidase superfamily protein
AT1G05270.1	385	367	388	528	519	424	4.97844	0.0964819	0.558796	TraB family protein
AT1G05280.1	50	27	37	44	38	51	1.25314	-0.0412307	1	Protein of unknown function (DUF604)
AT1G05290.1	0	0	0	0	0	0	-2.68597	0	1	CCT motif family protein
AT1G05300.1	90	78	64	112	107	106	2.53393	0.2221	0.466824	zinc transporter 5 precursor
AT1G05300.2	76	68	58	103	92	92	2.36698	0.241795	0.441587	zinc transporter 5 precursor
AT1G05310.1	101	95	87	155	180	128	3.03454	0.437035	0.03929	Pectin lyase-like superfamily protein
AT1G05320.1	477	416	468	550	502	384	5.11275	-0.199231	0.231182	unknown protein
AT1G05320.2	464	411	466	552	495	381	5.09915	-0.186005	0.286421	unknown protein
AT1G05320.3	470	420	471	551	493	381	5.11035	-0.210013	0.200799	unknown protein
AT1G05330.1	0	1	0	0	3	2	-2.1192	1.74556	0.512227	unknown protein
AT1G05340.1	109	56	73	176	90	101	2.97211	0.352238	0.551671	unknown protein
AT1G05350.1	390	335	396	476	480	412	4.85524	0.0155061	1	NAD(P)-binding Rossmann-fold superfamily protein
AT1G05360.1	241	243	258	296	316	266	4.33963	-0.0268329	1	unknown protein
AT1G05370.1	23	33	24	30	36	23	0.944307	-0.114887	0.940483	Sec14p-like phosphatidylinositol transfer family protein
AT1G05380.1	573	522	586	696	638	562	5.45415	-0.0976415	0.590125	Acyl-CoA N-acyltransferase with RING/FYVE/PHD-type zinc finger protein
AT1G05380.2	577	524	590	704	643	564	5.46512	-0.0950727	0.604494	Acyl-CoA N-acyltransferase with RING/FYVE/PHD-type zinc finger protein
AT1G05385.1	188	285	211	240	325	246	4.27385	-0.0203281	1	photosystem II 11 kDa protein-related
AT1G05400.1	7	8	5	16	6	14	-0.21225	0.578004	0.483002	unknown protein
AT1G05400.2	7	8	4	15	6	14	-0.321931	0.612675	0.423921	unknown protein
AT1G05410.1	185	200	192	274	265	244	4.07755	0.173335	0.26624	Protein of unknown function (DUF1423)
AT1G05410.2	176	184	177	262	250	231	3.98846	0.201281	0.190742	Protein of unknown function (DUF1423)
AT1G05420.1	16	17	10	9	9	7	0.297965	-1.03765	0.0473519	ovate family protein 12
AT1G05430.1	322	323	300	396	366	311	4.70916	-0.0852939	0.59323	unknown protein
AT1G05440.1	33	30	35	41	60	32	1.56309	0.164565	0.829201	C-8 sterol isomerases
AT1G05450.1	2	3	4	2	0	3	-1.44074	-1.05385	0.619887	Bifunctional inhibitor/lipid-transfer protein/seed storage 2S albumin superfamily protein
AT1G05450.2	6	7	6	7	3	7	-0.481471	-0.413243	0.848389	Bifunctional inhibitor/lipid-transfer protein/seed storage 2S albumin superfamily protein
AT1G05460.1	191	228	227	241	242	223	4.09281	-0.139035	0.423649	P-loop containing nucleoside triphosphate hydrolases superfamily protein
AT1G05470.1	189	215	189	251	267	191	4.0229	-0.0127531	1	DNAse I-like superfamily protein
AT1G05490.1	10	12	23	9	20	18	0.755414	-0.206443	0.881267	chromatin remodeling 31
AT1G05500.1	710	679	634	808	799	667	5.69635	-0.10029	0.325382	Calcium-dependent lipid-binding (CaLB domain) family protein
AT1G05510.1	0	0	0	0	0	0	-2.31181	0	1	Protein of unknown function (DUF1264)
AT1G05520.1	621	554	558	674	655	563	5.49054	-0.143077	0.252628	Sec23/Sec24 protein transport family protein
AT1G05530.1	56	27	35	36	28	26	1.03965	-0.660692	0.0829306	UDP-glucosyl transferase 75B2
AT1G05540.1	96	102	101	92	98	85	2.88423	-0.38855	0.0815524	Protein of unknown function (DUF295)
AT1G05550.1	8	6	3	3	4	4	-1.04306	-0.869326	0.502179	Protein of unknown function (DUF295)
AT1G05550.2	8	6	3	3	4	3	-1.08956	-1.00317	0.406052	Protein of unknown function (DUF295)
AT1G05550.3	7	6	4	5	5	3	-1.02029	-0.641614	0.770809	Protein of unknown function (DUF295)
AT1G05560.1	681	767	612	873	925	519	5.84367	-0.112437	0.786686	UDP-glucosyltransferase 75B1
AT1G05570.1	754	646	788	753	654	798	5.72112	-0.248642	0.165608	callose synthase 1
AT1G05570.2	736	629	762	736	641	779	5.68796	-0.240341	0.177474	callose synthase 1
AT1G05575.1	10	10	6	14	11	14	-0.00659318	0.319865	0.818383	unknown protein
AT1G05577.1	3	3	4	9	12	6	-0.708632	1.13233	0.17368	Domain of unknown function (DUF966)
AT1G05580.1	0	0	0	0	0	0	-2.72213	0	1	cation/H+ exchanger 23
AT1G05580.2	0	0	0	0	0	0	-2.72213	0	1	cation/H+ exchanger 23
AT1G05590.1	225	237	209	263	303	234	4.24545	-0.0153315	1	beta-hexosaminidase 2
AT1G05600.1	73	95	75	122	137	127	2.94845	0.403072	0.0463975	Tetratricopeptide repeat (TPR)-like superfamily protein
AT1G05600.2	74	96	80	128	139	131	2.99674	0.405753	0.0349926	Tetratricopeptide repeat (TPR)-like superfamily protein
AT1G05610.1	11	8	13	12	15	10	-0.0635063	-0.0645518	1	ADP-glucose pyrophosphorylase small subunit 2
AT1G05620.1	312	216	256	409	370	359	4.36335	0.268822	0.0791606	uridine-ribohydrolase 2
AT1G05620.2	278	192	228	369	344	321	4.20889	0.297212	0.0455142	uridine-ribohydrolase 2
AT1G05630.1	250	293	282	354	378	367	4.47895	0.14939	0.346454	Endonuclease/exonuclease/phosphatase family protein
AT1G05630.2	252	292	276	346	366	365	4.47248	0.129675	0.430981	Endonuclease/exonuclease/phosphatase family protein
AT1G05640.1	47	27	52	62	61	32	1.67234	0.0123314	1	Ankyrin repeat family protein
AT1G05650.1	92	46	49	114	74	61	1.98216	0.135052	0.965261	Pectin lyase-like superfamily protein
AT1G05660.1	150	72	103	165	128	131	2.72623	0.111197	0.956218	Pectin lyase-like superfamily protein
AT1G05670.1	95	140	132	133	133	94	3.38605	-0.297961	0.0927805	Pentatricopeptide repeat (PPR-like) superfamily protein
AT1G05670.2	95	139	131	123	131	93	3.35291	-0.342971	0.0496134	Pentatricopeptide repeat (PPR-like) superfamily protein
AT1G05675.1	2	2	1	4	0	8	-1.11769	1.01115	0.733058	UDP-Glycosyltransferase superfamily protein
AT1G05680.1	220	125	96	269	195	161	3.75004	0.230979	0.763918	Uridine diphosphate glycosyltransferase 74E2
AT1G05690.1	53	75	83	66	57	45	2.75694	-0.597908	0.00507868	BTB and TAZ domain protein 3
AT1G05700.1	33	25	57	25	69	72	1.85285	0.26025	0.779744	Leucine-rich repeat transmembrane protein kinase protein
AT1G05710.1	93	98	69	127	141	120	2.89517	0.310521	0.0924612	basic helix-loop-helix (bHLH) DNA-binding superfamily protein
AT1G05710.2	122	131	107	167	163	154	3.16104	0.160132	0.394391	basic helix-loop-helix (bHLH) DNA-binding superfamily protein
AT1G05710.3	125	134	107	172	170	163	3.22	0.197456	0.22254	basic helix-loop-helix (bHLH) DNA-binding superfamily protein
AT1G05710.4	89	99	67	125	138	119	2.85643	0.316283	0.0837983	basic helix-loop-helix (bHLH) DNA-binding superfamily protein
AT1G05710.5	110	122	95	160	156	149	3.11623	0.241307	0.146391	basic helix-loop-helix (bHLH) DNA-binding superfamily protein
AT1G05720.1	244	184	227	306	326	281	4.2936	0.208295	0.152842	selenoprotein family protein
AT1G05730.1	82	58	69	82	71	87	2.43416	-0.0655468	0.989582	Eukaryotic protein of unknown function (DUF842)
AT1G05740.1	0	0	0	0	0	0	-2.63365	0	1	Eukaryotic protein of unknown function (DUF842)
AT1G05750.1	115	108	94	115	137	91	3.04859	-0.156382	0.505939	Tetratricopeptide repeat (TPR)-like superfamily protein
AT1G05760.1	45	45	39	60	66	52	1.84231	0.195494	0.614282	Mannose-binding lectin superfamily protein
AT1G05770.1	13	21	17	32	13	14	0.571753	-0.0562046	1	Mannose-binding lectin superfamily protein
AT1G05780.1	58	52	58	73	97	73	2.21055	0.262008	0.341994	Vacuolar ATPase assembly integral membrane protein VMA21-like domain
AT1G05785.1	62	61	63	98	93	82	2.73566	0.284753	0.220266	Got1/Sft2-like vescicle transport protein family
AT1G05785.2	58	59	60	91	89	77	2.63912	0.269161	0.251536	Got1/Sft2-like vescicle transport protein family
AT1G05790.1	215	252	223	271	244	231	4.22397	-0.153193	0.362756	lipase class 3 family protein
AT1G05790.2	246	283	248	316	288	251	4.39703	-0.129278	0.438839	lipase class 3 family protein
AT1G05805.1	213	190	165	324	325	408	4.27144	0.642531	4.01e-06	basic helix-loop-helix (bHLH) DNA-binding superfamily protein
AT1G05810.1	82	57	57	111	90	133	2.44822	0.515723	0.0655114	RAB GTPase homolog A5E
AT1G05820.1	31	35	31	28	47	45	1.63855	0.0413497	1	SIGNAL PEPTIDE PEPTIDASE-LIKE 5
AT1G05820.2	35	38	31	30	49	43	1.78144	-0.0361092	1	SIGNAL PEPTIDE PEPTIDASE-LIKE 5
AT1G05830.1	466	526	514	704	644	580	5.45401	0.0887875	0.57554	trithorax-like protein 2
AT1G05830.2	453	513	499	679	629	565	5.40439	0.0869314	0.594956	trithorax-like protein 2
AT1G05835.1	120	189	153	152	185	140	3.78102	-0.221329	0.401528	PHD finger protein
AT1G05840.1	229	209	204	303	347	312	4.29368	0.316385	0.0100128	Eukaryotic aspartyl protease family protein
AT1G05850.1	5585	5793	5304	7401	7641	6915	8.93933	0.131581	0.049679	Chitinase family protein
AT1G05860.1	111	88	93	154	155	130	3.1994	0.319118	0.0432515	unknown protein
AT1G05870.1	353	432	386	404	438	311	5.11205	-0.294701	0.0251674	Protein of unknown function (DUF1685)
AT1G05870.2	398	507	435	459	510	345	5.37069	-0.301185	0.011878	Protein of unknown function (DUF1685)
AT1G05870.3	360	459	399	422	463	322	5.21646	-0.285382	0.0242203	Protein of unknown function (DUF1685)
AT1G05870.4	369	459	406	430	477	328	5.24451	-0.271859	0.0353827	Protein of unknown function (DUF1685)
AT1G05880.1	15	4	11	11	9	8	0.276743	-0.369048	0.743091	RING/U-box superfamily protein
AT1G05880.2	17	5	12	12	11	8	0.332959	-0.405054	0.713357	RING/U-box superfamily protein
AT1G05890.1	748	655	587	1036	976	891	5.95088	0.278694	0.00298522	RING/U-box superfamily protein
AT1G05890.2	725	630	576	991	929	859	5.89717	0.259225	0.00719717	RING/U-box superfamily protein
AT1G05894.1	9	3	7	10	7	4	-0.637796	-0.128803	1	unknown protein
AT1G05900.1	189	230	181	233	257	196	4.24508	-0.0750128	0.747191	endonuclease III 2
AT1G05900.2	193	235	193	243	274	205	4.32289	-0.0513172	0.875005	endonuclease III 2
AT1G05910.1	549	516	522	496	530	490	5.34504	-0.333059	0.000209015	cell division cycle protein 48-related / CDC48-related
AT1G05920.1	0	0	0	0	0	0	-2.63361	0	1	Domain of unknown function (DUF313)
AT1G05930.1	0	0	0	0	0	0	-2.70403	0	1	Domain of unknown function (DUF313)
AT1G05940.1	502	584	489	614	602	448	5.39211	-0.191119	0.0878109	cationic amino acid transporter 9
AT1G05950.1	60	77	54	81	94	80	2.76595	0.149576	0.615607	unknown protein
AT1G05960.1	797	733	729	928	780	767	5.78987	-0.134052	0.355164	ARM repeat superfamily protein
AT1G05960.2	778	716	718	915	769	759	5.76501	-0.122507	0.41573	ARM repeat superfamily protein
AT1G05970.1	49	63	57	84	100	68	2.38515	0.306306	0.199437	RNA-binding (RRM/RBD/RNP motifs) family protein
AT1G05970.2	48	65	57	93	98	72	2.44803	0.359703	0.103761	RNA-binding (RRM/RBD/RNP motifs) family protein
AT1G05990.1	2	3	3	1	2	5	-1.86579	-0.23251	1	EF hand calcium-binding protein family
AT1G06000.1	1492	1333	1442	1155	1125	708	6.66572	-0.798325	4.87e-14	UDP-Glycosyltransferase superfamily protein
AT1G06010.1	111	97	110	142	197	127	3.37911	0.275577	0.181483	unknown protein
AT1G06020.1	4	7	2	5	2	6	-0.901771	-0.257263	1	pfkB-like carbohydrate kinase family protein
AT1G06030.1	4	0	2	5	2	3	-1.65049	0.445974	1	pfkB-like carbohydrate kinase family protein
AT1G06040.1	2770	2884	2487	3028	3409	2756	7.9772	-0.0927079	0.272742	B-box zinc finger family protein
AT1G06040.2	2617	2727	2316	2809	3168	2556	7.88046	-0.112109	0.143802	B-box zinc finger family protein
AT1G06050.1	69	50	59	77	75	77	2.3365	0.0960522	0.896814	Protein of unknown function (DUF1336)
AT1G06060.1	164	164	178	256	262	218	3.97812	0.271663	0.0196188	LisH and RanBPM domains containing protein
AT1G06070.1	209	201	203	235	272	243	4.14811	0.0233331	1	Basic-leucine zipper (bZIP) transcription factor family protein
AT1G06080.1	198	170	196	266	218	290	4.14641	0.20156	0.673403	delta 9 desaturase 1
AT1G06090.1	298	160	218	321	269	276	3.89056	0.0866186	0.962627	Fatty acid desaturase family protein
AT1G06100.1	37	38	32	48	45	41	1.60177	0.0577965	1	Fatty acid desaturase family protein
AT1G06110.1	370	377	332	487	539	367	4.95047	0.0954354	0.568604	SKP1/ASK-interacting protein 16
AT1G06120.1	121	58	77	149	102	111	2.51519	0.229905	0.685997	Fatty acid desaturase family protein
AT1G06130.1	344	389	335	418	481	389	4.89038	0.00208787	1	glyoxalase 2-4
AT1G06130.2	328	373	329	408	463	375	4.84087	0.00640409	1	glyoxalase 2-4
AT1G06135.1	0	0	0	0	0	0	-2.72216	0	1	unknown protein
AT1G06137.1	0	0	0	0	0	0	-2.72211	0	1	unknown protein
AT1G06140.1	11	17	10	13	5	12	0.320594	-0.595449	0.449311	Pentatricopeptide repeat (PPR) superfamily protein
AT1G06148.1	0	1	2	3	1	6	-1.82594	1.37753	0.405358	unknown protein
AT1G06148.2	0	1	2	0	1	4	-1.97063	0.431194	0.978684	unknown protein
AT1G06149.1	502	512	467	558	520	409	5.38659	-0.264468	0.00532342	conserved peptide upstream open reading frame 8
AT1G06150.1	517	521	479	563	526	414	5.38199	-0.283784	0.00220521	basic helix-loop-helix (bHLH) DNA-binding superfamily protein
AT1G06150.2	502	512	467	558	520	409	5.38659	-0.264468	0.00532342	basic helix-loop-helix (bHLH) DNA-binding superfamily protein
AT1G06160.1	24	12	21	32	36	61	0.788367	0.929081	0.263489	octadecanoid-responsive Arabidopsis AP2/ERF 59
AT1G06170.1	10	6	6	6	4	3	-0.120677	-1.00643	0.281439	basic helix-loop-helix (bHLH) DNA-binding superfamily protein
AT1G06170.2	10	4	6	6	4	3	-0.145013	-0.872683	0.401633	basic helix-loop-helix (bHLH) DNA-binding superfamily protein
AT1G06180.1	97	103	95	113	117	68	3.25062	-0.259646	0.269841	myb domain protein 13
AT1G06190.1	978	1360	1082	1335	1543	1020	6.43719	-0.084329	0.53962	Rho termination factor
AT1G06190.2	789	1086	857	1083	1254	826	6.1189	-0.0616062	0.739023	Rho termination factor
AT1G06200.1	531	551	494	732	725	617	5.61482	0.128249	0.22179	Peptidase S24/S26A/S26B/S26C family protein
AT1G06210.1	437	368	414	438	435	397	5.09525	-0.210171	0.0925623	ENTH/VHS/GAT family protein
AT1G06210.2	414	349	401	412	413	381	5.01944	-0.218186	0.123596	ENTH/VHS/GAT family protein
AT1G06220.1	1343	1409	1340	1382	1352	1171	6.61626	-0.335698	1.15e-06	Ribosomal protein S5/Elongation factor G/III/V family protein
AT1G06220.2	1339	1406	1332	1380	1350	1166	6.61321	-0.333756	1.2e-06	Ribosomal protein S5/Elongation factor G/III/V family protein
AT1G06225.1	0	0	0	0	0	0	-2.68614	0	1	CLAVATA3/ESR-RELATED 3
AT1G06230.1	759	830	768	972	999	804	6.02417	-0.0342375	0.908633	global transcription factor group E4
AT1G06230.2	757	825	769	970	999	805	6.02298	-0.0311417	0.926798	global transcription factor group E4
AT1G06230.3	706	792	732	900	940	754	5.92409	-0.0516262	0.805242	global transcription factor group E4
AT1G06240.1	192	231	201	205	271	175	4.13803	-0.210987	0.179801	Protein of unknown function DUF455
AT1G06250.1	18	21	26	13	36	16	1.00039	-0.277757	0.697253	alpha/beta-Hydrolases superfamily protein
AT1G06260.1	13	14	12	22	16	14	0.4392	0.145637	1	Cysteine proteinases superfamily protein
AT1G06270.1	70	71	63	89	87	55	2.50316	-0.0905793	0.854435	Pentatricopeptide repeat (PPR) superfamily protein
AT1G06280.1	0	0	0	0	0	0	-1.90781	0	1	LOB domain-containing protein 2
AT1G06290.1	1176	1043	1012	1338	1332	1256	6.26398	0.0155849	1	acyl-CoA oxidase 3
AT1G06310.1	32	13	25	27	19	30	0.604874	-0.145521	0.948787	acyl-CoA oxidase 6
AT1G06320.1	7	1	6	5	2	3	-1.49417	-0.73518	0.670483	unknown protein
AT1G06330.1	6	3	4	2	3	8	-1.42569	-0.25184	1	Heavy metal transport/detoxification superfamily protein
AT1G06340.1	1	0	0	0	2	0	-1.98168	0.575848	1	Plant Tudor-like protein
AT1G06350.1	33	52	60	49	60	65	2.83577	-0.00142895	1	Fatty acid desaturase family protein
AT1G06360.1	556	813	641	1090	890	954	5.7757	0.290075	0.0437585	Fatty acid desaturase family protein
AT1G06370.1	32	41	38	51	57	46	1.80718	0.20326	0.692656	pseudogene
AT1G06380.1	116	110	101	129	121	99	3.29588	-0.174768	0.424787	Ribosomal protein L1p/L10e family
AT1G06390.1	581	640	569	837	884	894	5.60775	0.285609	0.000831974	GSK3/SHAGGY-like protein kinase 1
AT1G06390.2	528	590	520	750	795	824	5.4696	0.272427	0.00417288	GSK3/SHAGGY-like protein kinase 1
AT1G06400.1	410	384	353	612	578	583	5.11806	0.365192	0.000417082	Ras-related small GTP-binding family protein
AT1G06410.1	1490	1666	1524	2315	2033	2287	6.96765	0.247621	0.0368821	trehalose-phosphatase/synthase 7
AT1G06420.1	32	27	29	53	49	39	1.71617	0.407637	0.323149	unknown protein
AT1G06420.2	28	19	26	43	45	29	1.48275	0.402473	0.407595	unknown protein
AT1G06430.1	2115	2443	1798	2429	2481	1797	7.51783	-0.192159	0.0535876	FTSH protease 8
AT1G06440.1	25	17	24	24	26	25	0.821317	-0.0839087	0.993127	Ubiquitin carboxyl-terminal hydrolase family protein
AT1G06450.1	61	54	59	58	80	51	2.39677	-0.150674	0.660694	Polynucleotidyl transferase, ribonuclease H-like superfamily protein
AT1G06460.1	485	517	435	571	635	457	5.86768	-0.0606627	0.788279	alpha-crystallin domain 32.1
AT1G06470.1	300	296	263	302	332	315	4.56077	-0.121278	0.457481	Nucleotide/sugar transporter family protein
AT1G06470.2	331	324	279	328	357	339	4.68392	-0.132049	0.376118	Nucleotide/sugar transporter family protein
AT1G06475.1	35	33	32	42	31	45	1.11196	-0.0214489	1	unknown protein
AT1G06490.1	199	174	188	226	160	190	3.66727	-0.224542	0.380437	glucan synthase-like 7
AT1G06500.1	62	76	98	98	125	105	3.091	0.204507	0.45481	unknown protein
AT1G06500.2	59	72	89	90	108	92	2.97755	0.128865	0.74272	unknown protein
AT1G06500.3	67	80	104	102	122	106	3.13368	0.125066	0.708875	unknown protein
AT1G06500.4	52	66	79	83	100	76	2.81322	0.124723	0.754657	unknown protein
AT1G06510.1	193	264	211	287	307	241	4.22136	0.0542181	0.884846	unknown protein
AT1G06515.1	126	112	121	196	228	180	3.50959	0.479907	0.000649441	Protein of unknown function (DUF3317)
AT1G06515.2	142	129	149	236	269	230	3.76008	0.537609	2.83e-05	Protein of unknown function (DUF3317)
AT1G06520.1	18	25	16	33	29	32	0.513389	0.41249	0.532979	glycerol-3-phosphate acyltransferase 1
AT1G06530.1	672	801	683	840	845	657	5.81525	-0.150086	0.205126	Tropomyosin-related
AT1G06540.1	10	4	4	9	5	3	-0.525161	-0.346572	0.828965	unknown protein
AT1G06550.1	1133	992	1028	1233	1238	1043	6.44619	-0.114637	0.310504	ATP-dependent caseinolytic (Clp) protease/crotonase family protein
AT1G06560.1	182	182	175	225	237	219	3.93534	0.070085	0.784444	NOL1/NOP2/sun family protein
AT1G06570.1	650	748	615	937	832	718	5.96315	0.038942	0.937541	phytoene desaturation 1
AT1G06570.2	607	698	570	860	772	664	5.84234	0.0261485	1	phytoene desaturation 1
AT1G06580.1	26	24	26	56	45	49	1.54871	0.711236	0.00881986	Pentatricopeptide repeat (PPR) superfamily protein
AT1G06590.1	165	157	164	205	191	173	3.78832	-0.0410151	0.989236	unknown protein
AT1G06620.1	170	123	145	221	183	197	3.43995	0.190488	0.494457	2-oxoglutarate (2OG) and Fe(II)-dependent oxygenase superfamily protein
AT1G06630.1	138	141	133	171	180	174	3.61656	0.0841331	0.803412	F-box/RNI-like superfamily protein
AT1G06630.2	120	122	113	166	163	153	3.48048	0.174942	0.4629	F-box/RNI-like superfamily protein
AT1G06630.3	125	126	125	158	160	161	3.46126	0.084681	0.85228	F-box/RNI-like superfamily protein
AT1G06640.1	1218	1091	1049	1682	1274	1254	6.5742	0.0601747	0.800503	2-oxoglutarate (2OG) and Fe(II)-dependent oxygenase superfamily protein
AT1G06640.2	1126	1022	971	1559	1179	1162	6.46864	0.0566408	0.818479	2-oxoglutarate (2OG) and Fe(II)-dependent oxygenase superfamily protein
AT1G06640.3	1092	998	945	1517	1156	1132	6.42675	0.0603376	0.798274	2-oxoglutarate (2OG) and Fe(II)-dependent oxygenase superfamily protein
AT1G06645.1	73	102	70	134	143	126	3.22315	0.454329	0.0320894	2-oxoglutarate (2OG) and Fe(II)-dependent oxygenase superfamily protein
AT1G06650.1	450	511	405	570	600	491	5.42506	0.0152279	1	2-oxoglutarate (2OG) and Fe(II)-dependent oxygenase superfamily protein
AT1G06650.2	493	585	461	634	681	553	5.59636	0.0128294	1	2-oxoglutarate (2OG) and Fe(II)-dependent oxygenase superfamily protein
AT1G06660.1	68	48	59	80	73	59	2.03079	0.00427967	1	unknown protein
AT1G06670.1	1060	1078	1101	1020	1006	957	6.2669	-0.38464	9.05e-05	nuclear DEIH-boxhelicase
AT1G06680.1	35609	43198	34757	44809	54744	39673	11.6756	0.0235503	0.953849	photosystem II subunit P-1
AT1G06680.2	32401	39535	31625	40883	50010	36320	11.5474	0.0266789	0.928923	photosystem II subunit P-1
AT1G06690.1	710	864	732	873	999	649	6.13742	-0.146439	0.246741	NAD(P)-linked oxidoreductase superfamily protein
AT1G06700.1	711	703	652	951	962	817	5.92524	0.133708	0.176049	Protein kinase superfamily protein
AT1G06700.2	707	689	639	956	952	831	5.91468	0.161021	0.0927048	Protein kinase superfamily protein
AT1G06710.1	76	89	101	118	99	75	2.88471	-0.137388	0.661321	Tetratricopeptide repeat (TPR)-like superfamily protein
AT1G06720.1	681	741	725	832	739	677	5.74331	-0.20094	0.14472	P-loop containing nucleoside triphosphate hydrolases superfamily protein
AT1G06730.1	195	206	189	203	221	179	3.94816	-0.237059	0.0825699	pfkB-like carbohydrate kinase family protein
AT1G06750.1	11	9	14	12	17	14	0.575316	0.0688859	1	P-loop containing nucleoside triphosphate hydrolases superfamily protein
AT1G06750.2	2	1	2	2	2	0	-1.59977	-0.546886	0.978258	P-loop containing nucleoside triphosphate hydrolases superfamily protein
AT1G06760.1	2339	2461	2327	2571	2760	2242	7.5669	-0.182564	0.0682289	winged-helix DNA-binding transcription factor family protein
AT1G06770.1	96	81	109	145	130	111	3.09057	0.161188	0.539354	DREB2A-interacting protein 1
AT1G06770.2	96	78	106	142	130	109	3.06695	0.172772	0.511363	DREB2A-interacting protein 1
AT1G06780.1	291	244	257	300	257	245	4.27592	-0.249948	0.169649	galacturonosyltransferase 6
AT1G06780.2	292	246	260	301	258	246	4.27393	-0.255485	0.16025	galacturonosyltransferase 6
AT1G06790.1	116	116	116	127	150	129	3.41073	-0.0457618	1	RNA polymerase Rpb7 N-terminal domain-containing protein
AT1G06790.2	140	132	132	155	172	154	3.61122	-0.0159541	1	RNA polymerase Rpb7 N-terminal domain-containing protein
AT1G06800.1	146	138	125	191	163	173	3.54834	0.100606	0.700576	alpha/beta-Hydrolases superfamily protein
AT1G06800.2	117	116	103	152	124	135	3.20565	0.0255751	1	alpha/beta-Hydrolases superfamily protein
AT1G06810.1	1	0	0	2	0	0	-2.45618	0.577253	1	unknown protein
AT1G06820.1	525	632	577	658	731	512	5.5342	-0.139968	0.197588	carotenoid isomerase
AT1G06830.1	73	82	48	40	48	67	2.0775	-0.634713	0.0471353	Glutaredoxin family protein
AT1G06840.1	307	267	293	379	352	339	4.60557	0.0359482	0.987217	Leucine-rich repeat protein kinase family protein
AT1G06850.1	99	79	86	123	109	108	2.83433	0.0975635	0.822315	basic leucine-zipper 52
AT1G06850.2	79	57	67	97	83	80	2.46189	0.0880038	0.923618	basic leucine-zipper 52
AT1G06870.1	316	277	264	380	379	323	4.51776	0.0675812	0.759579	Peptidase S24/S26A/S26B/S26C family protein
AT1G06890.1	534	429	567	680	649	591	5.3034	0.0548585	0.86972	nodulin MtN21 /EamA-like transporter family protein
AT1G06890.2	486	376	499	594	591	522	5.14829	0.0533285	0.886995	nodulin MtN21 /EamA-like transporter family protein
AT1G06890.3	516	414	536	664	610	569	5.22866	0.0583087	0.864785	nodulin MtN21 /EamA-like transporter family protein
AT1G06900.1	851	817	781	947	969	807	5.81544	-0.116474	0.277442	Insulinase (Peptidase family M16) family protein
AT1G06910.1	83	86	75	101	77	68	2.7487	-0.25589	0.320859	TRF-like 7
AT1G06920.1	1	0	1	0	1	0	-2.55029	-1.00252	1	ovate family protein 4
AT1G06923.1	15	7	5	17	12	9	-0.425101	0.220613	0.92498	unknown protein
AT1G06925.1	0	0	0	0	0	0	-2.65074	0	1	unknown protein
AT1G06930.1	14	16	12	18	11	15	-0.183032	-0.196048	0.903964	unknown protein
AT1G06950.1	2722	3665	2975	3197	3629	2699	7.67459	-0.244388	0.00690592	translocon at the inner envelope membrane of chloroplasts 110
AT1G06960.1	151	147	140	181	225	151	3.76571	0.0739196	0.847734	RNA-binding (RRM/RBD/RNP motifs) family protein
AT1G06960.2	140	136	130	168	194	136	3.65617	0.0227296	1	RNA-binding (RRM/RBD/RNP motifs) family protein
AT1G06960.3	135	138	126	170	203	135	3.62049	0.0759331	0.857272	RNA-binding (RRM/RBD/RNP motifs) family protein
AT1G06970.1	1	3	1	0	0	0	-2.00354	-3.97062	0.228982	cation/hydrogen exchanger 14
AT1G06980.1	35	46	30	33	34	28	2.26449	-0.4897	0.14087	unknown protein
AT1G06990.1	0	0	0	0	0	0	-2.58328	0	1	GDSL-like Lipase/Acylhydrolase superfamily protein
AT1G07000.1	129	89	137	136	106	171	3.24937	-0.0363872	1	exocyst subunit exo70 family protein B2
AT1G07010.1	960	1267	989	1013	1022	734	6.51506	-0.485985	5.28e-09	Calcineurin-like metallo-phosphoesterase superfamily protein
AT1G07010.2	922	1222	945	967	990	709	6.45994	-0.482346	8.96e-09	Calcineurin-like metallo-phosphoesterase superfamily protein
AT1G07010.3	870	1159	913	926	952	673	6.39561	-0.476403	5.48e-08	Calcineurin-like metallo-phosphoesterase superfamily protein
AT1G07020.1	117	77	106	164	156	136	3.17905	0.332693	0.0731146	unknown protein
AT1G07025.1	0	0	0	0	0	0	-2.704	0	1	Mitochondrial substrate carrier family protein
AT1G07030.1	322	270	309	419	381	290	4.67942	-8.44e-05	1	Mitochondrial substrate carrier family protein
AT1G07040.1	217	151	130	282	215	242	3.98632	0.30774	0.0874718	unknown protein
AT1G07050.1	8	8	6	2	7	7	-0.111443	-0.708956	0.55153	CCT motif family protein
AT1G07060.1	3	2	0	2	0	0	-2.04842	-1.4142	0.791549	unknown protein
AT1G07070.1	318	296	323	360	419	327	4.5565	-0.0328772	0.973414	Ribosomal protein L35Ae family protein
AT1G07080.1	823	818	737	1016	1141	926	6.21813	0.10576	0.341007	Thioredoxin superfamily protein
AT1G07090.1	103	106	115	112	97	98	3.04368	-0.344471	0.102794	Protein of unknown function (DUF640)
AT1G07110.1	1576	2010	1528	1963	2005	1678	7.23335	-0.121428	0.176795	fructose-2,6-bisphosphatase
AT1G07120.1	7	20	20	18	16	19	0.669214	-0.0903633	1	unknown protein
AT1G07130.1	64	58	57	94	69	68	2.56371	0.100003	0.855933	Nucleic acid-binding, OB-fold-like protein
AT1G07135.1	13	19	8	50	22	147	1.4226	2.27267	0.000307313	glycine-rich protein
AT1G07140.1	1850	1759	1799	2214	2209	1946	7.11624	-0.0331297	0.932373	Pleckstrin homology (PH) domain superfamily protein
AT1G07150.1	27	29	24	33	21	29	1.66383	-0.211795	0.776222	mitogen-activated protein kinase kinase kinase 13
AT1G07150.2	27	29	24	33	21	29	1.66383	-0.211795	0.776222	mitogen-activated protein kinase kinase kinase 13
AT1G07160.1	3	2	2	7	3	3	-1.56615	0.600956	0.813989	Protein phosphatase 2C family protein
AT1G07170.1	130	93	139	178	166	191	3.39006	0.297303	0.104712	PHF5-like protein
AT1G07170.2	99	70	105	136	114	145	2.96168	0.263026	0.265375	PHF5-like protein
AT1G07170.3	120	83	126	156	137	165	3.23784	0.211475	0.350863	PHF5-like protein
AT1G07175.1	5	0	9	7	4	11	-0.927327	0.380388	0.870209	unknown protein
AT1G07180.1	1496	1926	1607	2001	1930	1524	7.11068	-0.151375	0.122944	alternative NAD(P)H dehydrogenase 1
AT1G07190.1	0	0	0	1	0	0	-2.72217	1.78172	1	unknown protein
AT1G07200.1	177	218	180	295	294	226	3.97745	0.234067	0.106838	Double Clp-N motif-containing P-loop nucleoside triphosphate hydrolases superfamily protein
AT1G07200.2	307	336	307	436	408	340	4.55661	0.049004	0.846046	Double Clp-N motif-containing P-loop nucleoside triphosphate hydrolases superfamily protein
AT1G07210.1	481	451	450	622	599	534	5.19239	0.0764667	0.620349	Ribosomal protein S18
AT1G07220.1	151	177	161	208	186	179	3.62985	-0.0366526	1	Arabidopsis thaliana protein of unknown function (DUF821)
AT1G07230.1	342	294	293	440	437	363	4.81176	0.146615	0.289282	non-specific phospholipase C1
AT1G07240.1	215	154	211	251	259	258	4.20403	0.136501	0.468094	UDP-glucosyl transferase 71C5
AT1G07250.1	446	454	375	436	480	374	5.29663	-0.251753	0.0139247	UDP-glucosyl transferase 71C4
AT1G07260.1	115	69	104	174	114	107	2.92805	0.180148	0.637122	UDP-glucosyl transferase 71C3
AT1G07270.1	26	29	24	25	24	24	0.956357	-0.378563	0.411594	Cell division control, Cdc6
AT1G07280.1	670	861	639	804	899	612	6.05647	-0.177566	0.160954	Tetratricopeptide repeat (TPR)-like superfamily protein
AT1G07280.2	639	823	609	763	850	573	5.99454	-0.193203	0.130852	Tetratricopeptide repeat (TPR)-like superfamily protein
AT1G07280.3	643	832	611	767	859	579	6.00595	-0.190973	0.140461	Tetratricopeptide repeat (TPR)-like superfamily protein
AT1G07290.1	36	31	27	31	35	29	1.06597	-0.251953	0.632697	golgi nucleotide sugar transporter 2
AT1G07300.1	63	43	36	49	39	48	2.18414	-0.326189	0.329912	josephin protein-related
AT1G07310.1	284	233	253	338	335	317	4.57712	0.0948309	0.596399	Calcium-dependent lipid-binding (CaLB domain) family protein
AT1G07320.1	4232	5878	4357	5411	6917	4704	8.49496	-0.0349401	0.925163	ribosomal protein L4
AT1G07320.2	3845	5400	3966	4953	6341	4344	8.35326	-0.026472	0.980241	ribosomal protein L4
AT1G07320.3	3276	4638	3457	4285	5335	3718	8.11385	-0.0392856	0.908766	ribosomal protein L4
AT1G07320.4	3844	5389	3967	4957	6343	4341	8.35328	-0.025108	0.988496	ribosomal protein L4
AT1G07330.1	4	3	2	1	5	1	-1.47955	-0.608079	0.795313	unknown protein
AT1G07340.1	0	0	0	0	0	0	-2.66827	0	1	sugar transporter 2
AT1G07350.1	400	384	401	568	519	478	5.13557	0.133116	0.34224	RNA-binding (RRM/RBD/RNP motifs) family protein
AT1G07350.2	410	406	420	583	537	489	5.19105	0.1122	0.461568	RNA-binding (RRM/RBD/RNP motifs) family protein
AT1G07360.1	572	627	625	724	600	526	5.57679	-0.249081	0.0126022	CCCH-type zinc fingerfamily protein with RNA-binding domain
AT1G07370.1	312	345	328	360	366	275	4.7468	-0.246988	0.0147117	proliferating cellular nuclear antigen 1
AT1G07380.1	229	185	185	233	241	209	3.91093	-0.0795724	0.799734	Neutral/alkaline non-lysosomal ceramidase
AT1G07390.1	63	95	73	70	58	39	2.29717	-0.736159	0.000800492	receptor like protein 1
AT1G07390.2	58	86	66	65	54	37	2.21322	-0.69658	0.00199907	receptor like protein 1
AT1G07390.3	63	94	73	66	56	39	2.26815	-0.782077	0.000254495	receptor like protein 1
AT1G07400.1	12	8	17	23	13	19	0.914658	0.30218	0.805125	HSP20-like chaperones superfamily protein
AT1G07410.1	42	24	38	46	40	47	1.36987	0.0872549	0.982923	RAB GTPase homolog A2B
AT1G07420.1	249	215	235	306	277	256	4.59866	-0.00520614	1	sterol 4-alpha-methyl-oxidase 2-1
AT1G07420.2	248	211	231	290	267	248	4.5531	-0.0460927	0.908184	sterol 4-alpha-methyl-oxidase 2-1
AT1G07430.1	15	24	20	28	30	3	1.83351	-0.247272	0.85587	highly ABA-induced PP2C gene 2
AT1G07440.1	516	579	493	542	665	473	5.6419	-0.190084	0.112086	NAD(P)-binding Rossmann-fold superfamily protein
AT1G07440.2	467	515	449	479	598	431	5.49303	-0.195491	0.103414	NAD(P)-binding Rossmann-fold superfamily protein
AT1G07450.1	46	58	44	66	83	54	2.52565	0.185974	0.605756	NAD(P)-binding Rossmann-fold superfamily protein
AT1G07460.1	0	0	1	1	1	1	-2.13119	1.07794	0.910663	Concanavalin A-like lectin family protein
AT1G07470.1	479	511	478	659	681	525	5.37708	0.0745967	0.619887	Transcription factor IIA, alpha/beta subunit
AT1G07473.1	0	0	0	2	1	0	-1.9928	3.0525	0.555642	unknown protein
AT1G07476.1	0	0	0	0	0	0	-2.63367	0	1	unknown protein
AT1G07480.1	505	529	478	676	690	505	5.39444	0.0352271	0.936624	Transcription factor IIA, alpha/beta subunit
AT1G07480.2	494	517	469	659	680	494	5.3647	0.0363587	0.928381	Transcription factor IIA, alpha/beta subunit
AT1G07485.1	39	39	31	44	42	30	1.54669	-0.17822	0.715445	unknown protein
AT1G07490.1	46	41	37	51	62	35	1.83586	-0.0153937	1	ROTUNDIFOLIA like 3
AT1G07500.1	4	4	5	8	4	4	-1.31215	0.0297675	1	unknown protein
AT1G07510.1	693	608	577	757	669	587	5.65166	-0.168777	0.199403	FTSH protease 10
AT1G07520.1	142	102	118	204	199	159	3.40104	0.361413	0.0518962	GRAS family transcription factor
AT1G07530.1	395	435	412	538	563	477	5.1858	0.0771607	0.615518	SCARECROW-like 14
AT1G07540.1	0	1	0	0	0	0	-2.47153	-1.97679	1	TRF-like 2
AT1G07550.1	3	4	4	2	4	8	-0.423009	0.0908847	1	Leucine-rich repeat protein kinase family protein
AT1G07560.1	76	30	54	71	55	51	2.25911	-0.130842	0.893713	Leucine-rich repeat protein kinase family protein
AT1G07570.1	145	193	190	175	201	171	3.9862	-0.216924	0.180217	Protein kinase superfamily protein
AT1G07570.2	141	192	182	168	193	171	3.95675	-0.220015	0.18276	Protein kinase superfamily protein
AT1G07570.3	126	177	169	154	169	155	3.80426	-0.247732	0.182395	Protein kinase superfamily protein
AT1G07590.1	17648	12887	13718	21284	20879	19310	10.417	0.205529	0.27336	Tetratricopeptide repeat (TPR)-like superfamily protein
AT1G07600.1	3269	2435	2525	3693	3676	3395	7.92567	0.11952	0.545642	metallothionein 1A
AT1G07610.1	2448	1569	2071	2537	2974	2497	7.56244	0.118837	0.807532	metallothionein 1C
AT1G07615.1	96	104	92	163	123	114	3.14164	0.186775	0.486628	GTP-binding protein Obg/CgtA
AT1G07620.1	33	22	35	31	31	39	1.43535	-0.0975235	1	GTP-binding protein Obg/CgtA
AT1G07630.1	268	206	227	308	249	255	4.2145	-0.0550141	0.910235	pol-like 5
AT1G07640.1	399	439	413	376	402	284	5.23288	-0.50926	1.45e-06	Dof-type zinc finger DNA-binding family protein
AT1G07640.2	388	428	401	366	402	274	5.2007	-0.497822	5.05e-06	Dof-type zinc finger DNA-binding family protein
AT1G07640.3	387	430	398	366	405	278	5.20113	-0.48524	5.82e-06	Dof-type zinc finger DNA-binding family protein
AT1G07645.1	0	0	0	0	0	0	-2.33939	0	1	dessication-induced 1VOC superfamily protein
AT1G07650.1	347	430	360	492	514	530	5.24567	0.171769	0.0933459	Leucine-rich repeat transmembrane protein kinase
AT1G07650.2	335	407	343	474	487	507	5.18263	0.173854	0.0935968	Leucine-rich repeat transmembrane protein kinase
AT1G07660.1	475	454	442	667	726	486	5.5202	0.178067	0.174303	Histone superfamily protein
AT1G07660.2	294	277	257	392	436	285	4.80725	0.151911	0.338023	Histone superfamily protein
AT1G07670.1	1370	1197	1264	1536	1343	1258	6.44449	-0.157728	0.228843	endomembrane-type CA-ATPase 4
AT1G07680.1	0	0	0	0	0	1	-2.70395	1.78754	1	unknown protein
AT1G07690.1	0	0	1	1	0	0	-2.55011	-0.197141	1	unknown protein
AT1G07700.1	738	890	685	832	985	723	6.01918	-0.133725	0.248519	Thioredoxin superfamily protein
AT1G07700.2	638	735	596	704	852	623	5.78292	-0.123578	0.323149	Thioredoxin superfamily protein
AT1G07700.3	654	774	593	719	900	638	5.84768	-0.110413	0.431165	Thioredoxin superfamily protein
AT1G07705.1	350	359	323	404	381	351	4.70699	-0.127754	0.382656	NOT2 / NOT3 / NOT5 family
AT1G07705.2	360	366	335	427	403	363	4.75877	-0.0978976	0.536586	NOT2 / NOT3 / NOT5 family
AT1G07710.1	14	10	13	10	8	18	0.0471047	-0.297049	0.781195	Ankyrin repeat family protein
AT1G07720.1	277	408	293	454	540	520	5.00443	0.373835	0.00679504	3-ketoacyl-CoA synthase 3
AT1G07725.1	135	120	129	163	186	127	3.53263	0.036801	1	exocyst subunit exo70 family protein H6
AT1G07730.2	74	33	55	65	57	51	2.14129	-0.180052	0.746187	Disease resistance-responsive (dirigent-like protein) family protein
AT1G07740.1	123	79	97	101	103	87	2.91979	-0.31114	0.230322	Tetratricopeptide repeat (TPR)-like superfamily protein
AT1G07745.1	37	60	47	76	92	62	2.31946	0.404886	0.115546	homolog of RAD51 D
AT1G07745.2	36	61	48	80	89	62	2.35527	0.401721	0.103038	homolog of RAD51 D
AT1G07750.1	417	329	333	548	527	463	5.04015	0.24204	0.0611947	RmlC-like cupins superfamily protein
AT1G07770.1	3146	3222	2963	3767	4412	3537	7.89704	0.0588601	0.651246	ribosomal protein S15A
AT1G07770.2	2939	3073	2767	3518	4175	3302	7.81423	0.0552162	0.686879	ribosomal protein S15A
AT1G07780.1	302	336	317	436	411	318	4.76472	0.0156031	1	phosphoribosylanthranilate isomerase 1
AT1G07780.2	294	330	313	421	407	312	4.74204	0.0116803	1	phosphoribosylanthranilate isomerase 1
AT1G07780.3	353	385	375	483	447	362	4.87974	-0.0556186	0.851438	phosphoribosylanthranilate isomerase 1
AT1G07780.4	334	370	364	454	430	348	4.8081	-0.0648816	0.826522	phosphoribosylanthranilate isomerase 1
AT1G07780.5	295	332	312	423	411	315	4.7475	0.0200541	1	phosphoribosylanthranilate isomerase 1
AT1G07790.1	648	673	704	689	783	616	5.89664	-0.227726	0.0182153	Histone superfamily protein
AT1G07795.1	8	4	5	9	3	3	-0.905747	-0.44487	0.89593	unknown protein
AT1G07810.1	1199	1043	1047	1292	1149	1053	6.24877	-0.181108	0.139667	ER-type Ca2+-ATPase 1
AT1G07820.1	824	839	843	1121	1221	922	6.36865	0.107934	0.353218	Histone superfamily protein
AT1G07820.2	775	830	807	1099	1188	893	6.32295	0.125977	0.249407	Histone superfamily protein
AT1G07830.1	245	251	242	303	361	301	4.39498	0.11845	0.510251	ribosomal protein L29 family protein
AT1G07840.1	269	308	276	318	297	276	4.5239	-0.203752	0.0821273	Sas10/Utp3/C1D family
AT1G07840.2	252	275	257	296	265	257	4.40648	-0.205297	0.0934415	Sas10/Utp3/C1D family
AT1G07840.3	253	294	265	295	281	257	4.40963	-0.229776	0.0617489	Sas10/Utp3/C1D family
AT1G07850.1	0	2	0	1	0	1	-2.36788	-0.22262	1	Protein of unknown function (DUF604)
AT1G07860.1	0	0	0	0	0	1	-2.5503	1.78489	1	unknown protein
AT1G07870.1	159	129	173	201	165	179	3.6557	-0.0262407	1	Protein kinase superfamily protein
AT1G07870.2	145	122	156	184	146	172	3.5121	-0.0180105	1	Protein kinase superfamily protein
AT1G07880.1	55	58	62	88	87	70	2.1574	0.215297	0.498191	Protein kinase superfamily protein
AT1G07880.2	56	61	63	87	89	69	2.13755	0.17386	0.654904	Protein kinase superfamily protein
AT1G07885.1	0	0	0	0	1	0	-2.70401	1.77897	1	unknown protein
AT1G07890.1	10657	9136	9614	9637	9899	8996	9.51193	-0.311918	0.000953548	ascorbate peroxidase 1
AT1G07890.2	9977	8600	8974	9004	9349	8344	9.42352	-0.31435	0.000762205	ascorbate peroxidase 1
AT1G07890.3	9943	8573	8947	8967	9319	8319	9.41909	-0.314697	0.000771327	ascorbate peroxidase 1
AT1G07890.4	9978	8596	8967	8996	9346	8334	9.42271	-0.314994	0.000736386	ascorbate peroxidase 1
AT1G07890.5	9950	8576	8956	8975	9323	8330	9.41988	-0.314424	0.000780148	ascorbate peroxidase 1
AT1G07890.6	9913	8458	8973	8892	9041	8258	9.38477	-0.330551	0.000383755	ascorbate peroxidase 1
AT1G07890.7	9951	8576	8952	8971	9324	8323	9.41962	-0.31484	0.00076157	ascorbate peroxidase 1
AT1G07890.8	9974	8597	8969	8998	9348	8338	9.42307	-0.314497	0.00075872	ascorbate peroxidase 1
AT1G07900.1	5	0	1	5	5	2	-1.51008	0.689107	0.82964	LOB domain-containing protein 1
AT1G07901.1	6	4	5	8	8	5	-0.906352	0.211113	1	unknown protein
AT1G07910.1	285	314	320	323	285	271	4.47536	-0.331378	0.00570779	RNAligase
AT1G07910.2	295	324	326	332	305	287	4.52572	-0.299438	0.0144593	RNAligase
AT1G07920.1	21320	21550	20413	23771	24292	20964	10.5479	-0.14265	0.0236915	GTP binding Elongation factor Tu family protein
AT1G07930.1	19327	19514	18337	20902	21326	18592	10.3671	-0.178238	0.00375525	GTP binding Elongation factor Tu family protein
AT1G07930.2	14720	14821	14002	15800	16029	14076	9.97909	-0.190957	0.00244778	GTP binding Elongation factor Tu family protein
AT1G07940.1	20877	21034	19833	22979	23479	20299	10.4936	-0.155188	0.0142324	GTP binding Elongation factor Tu family protein
AT1G07940.2	20615	20736	19564	22633	23175	20062	10.4765	-0.154919	0.0140022	GTP binding Elongation factor Tu family protein
AT1G07950.1	166	148	149	203	218	182	3.7705	0.112017	0.622909	Surfeit locus protein 5 subunit 22 of Mediator complex
AT1G07960.1	288	278	276	382	361	281	4.62118	0.0109659	1	PDI-like 5-1
AT1G07960.2	306	290	288	391	372	291	4.677	-0.0175219	1	PDI-like 5-1
AT1G07960.3	305	286	294	403	372	297	4.68778	0.00499319	1	PDI-like 5-1
AT1G07970.1	189	215	182	265	255	212	4.00472	0.0528743	0.867981	unknown protein
AT1G07980.1	177	165	174	219	232	179	3.97174	0.0160402	1	nuclear factor Y, subunit C10
AT1G07985.1	35	20	25	56	55	25	1.14601	0.473199	0.39763	Expressed protein
AT1G07990.1	643	620	658	771	808	665	5.75736	-0.0465546	0.789069	SIT4 phosphatase-associated family protein
AT1G08000.1	116	108	105	112	128	78	3.17558	-0.322173	0.0897927	GATA transcription factor 10
AT1G08000.2	97	105	90	106	113	68	3.02499	-0.296766	0.149426	GATA transcription factor 10
AT1G08005.1	0	1	0	1	2	3	-2.33965	1.99413	0.369082	unknown protein
AT1G08010.1	184	165	177	202	218	165	3.98027	-0.116454	0.502418	GATA transcription factor 11
AT1G08010.2	133	106	129	139	164	129	3.47203	-0.0384116	0.97217	GATA transcription factor 11
AT1G08030.1	283	291	272	327	369	301	4.60504	-0.0318258	0.974373	tyrosylprotein sulfotransferase
AT1G08035.1	2	3	0	7	4	1	-1.44839	0.946393	0.513264	unknown protein
AT1G08040.1	290	308	293	367	398	276	4.65317	-0.0472676	0.843942	Protein of unknown function (DUF707)
AT1G08040.2	280	304	291	354	395	268	4.63001	-0.0555933	0.8105	Protein of unknown function (DUF707)
AT1G08050.1	95	64	92	133	92	109	2.67498	0.144759	0.78058	Zinc finger (C3HC4-type RING finger) family protein
AT1G08060.1	398	394	323	372	355	296	4.81185	-0.391719	0.000169045	ATP-dependent helicase family protein
AT1G08060.2	382	383	313	362	345	282	4.76291	-0.392195	0.000138141	ATP-dependent helicase family protein
AT1G08065.1	0	0	0	0	0	0	-2.44124	0	1	alpha carbonic anhydrase 5
AT1G08070.1	8	19	8	14	23	19	0.553973	0.410637	0.543991	Tetratricopeptide repeat (TPR)-like superfamily protein
AT1G08080.1	3	3	2	2	2	0	-1.52667	-1.19383	0.446892	alpha carbonic anhydrase 7
AT1G08090.1	158	109	205	167	210	184	3.03291	-0.0326697	1	nitrate transporter 2:1
AT1G08100.1	13	10	20	12	17	15	-0.255719	-0.239579	0.910235	nitrate transporter 2.2
AT1G08110.1	928	1018	909	1367	1367	1114	6.45431	0.161691	0.0305441	lactoylglutathione lyase family protein / glyoxalase I family protein
AT1G08110.2	938	1042	905	1358	1378	1115	6.45784	0.148017	0.0544584	lactoylglutathione lyase family protein / glyoxalase I family protein
AT1G08110.3	939	1037	922	1385	1388	1124	6.46473	0.158255	0.0388722	lactoylglutathione lyase family protein / glyoxalase I family protein
AT1G08110.4	953	1063	925	1389	1415	1140	6.49111	0.154583	0.0364772	lactoylglutathione lyase family protein / glyoxalase I family protein
AT1G08120.1	1	1	1	0	2	0	-2.08349	-0.741635	1	unknown protein
AT1G08125.1	167	159	167	239	267	208	3.98442	0.263789	0.0632388	S-adenosyl-L-methionine-dependent methyltransferases superfamily protein
AT1G08125.2	156	152	158	221	258	195	3.91555	0.261188	0.0924612	S-adenosyl-L-methionine-dependent methyltransferases superfamily protein
AT1G08125.3	104	100	116	152	185	142	3.44008	0.310407	0.0872066	S-adenosyl-L-methionine-dependent methyltransferases superfamily protein
AT1G08130.1	580	626	542	761	714	524	5.57193	-0.0782933	0.602216	DNA ligase 1
AT1G08135.1	0	0	0	0	0	0	-2.72211	0	1	cation/H+ exchanger 6B
AT1G08140.1	0	1	1	0	0	0	-2.65083	-2.78194	0.8105	cation/H+ exchanger 6A
AT1G08150.1	0	0	0	0	0	0	-2.65093	0	1	Cation/hydrogen exchanger family protein
AT1G08160.1	169	135	173	230	220	194	3.63936	0.161378	0.48643	Late embryogenesis abundant (LEA) hydroxyproline-rich glycoprotein family
AT1G08165.1	6	10	4	15	15	11	-0.304247	0.75976	0.345763	unknown protein
AT1G08170.1	1	1	0	1	4	0	-2.04884	0.934472	0.956344	Histone superfamily protein
AT1G08180.1	42	52	35	50	71	37	2.04745	0.0216619	1	unknown protein
AT1G08190.1	1834	1746	1615	1979	1959	1606	7.09488	-0.17619	0.0199151	vacuolar protein sorting 41
AT1G08200.1	3093	3061	2747	3754	3771	3088	7.96874	-0.0155626	0.996257	UDP-D-apiose/UDP-D-xylose synthase 2
AT1G08210.1	200	191	182	254	263	211	3.98994	0.0759546	0.777533	Eukaryotic aspartyl protease family protein
AT1G08220.1	157	116	155	130	135	123	3.23909	-0.412125	0.0152189	unknown protein
AT1G08220.2	125	87	128	93	104	101	2.86384	-0.46052	0.0341044	unknown protein
AT1G08230.2	118	143	119	232	215	150	3.74536	0.380257	0.0130301	Transmembrane amino acid transporter family protein
AT1G08250.1	225	222	208	195	203	128	4.25267	-0.590344	5.03e-06	arogenate dehydratase 6
AT1G08260.1	511	479	465	564	534	496	5.14653	-0.134887	0.441798	DNA polymerase epsilon catalytic subunit
AT1G08270.1	9	8	12	12	24	13	-0.00583425	0.479523	0.474018	unknown protein
AT1G08270.2	33	31	30	38	54	30	1.49118	0.101073	0.979311	unknown protein
AT1G08280.1	129	126	120	100	132	102	3.30728	-0.435783	0.00572514	Glycosyltransferase family 29 (sialyltransferase) family protein
AT1G08290.1	43	58	62	67	64	68	1.91054	0.0237945	1	WIP domain protein 3
AT1G08300.1	41	47	48	67	52	50	2.12113	0.0454261	1	no vein-like
AT1G08310.1	30	24	17	64	34	46	1.17366	0.756519	0.0202478	alpha/beta-Hydrolases superfamily protein
AT1G08310.2	28	26	16	62	34	44	1.13364	0.735984	0.0233918	alpha/beta-Hydrolases superfamily protein
AT1G08315.1	78	72	61	98	94	125	2.60136	0.32981	0.184446	ARM repeat superfamily protein
AT1G08320.1	160	78	111	196	151	173	3.4035	0.307976	0.366928	bZIP transcription factor family protein
AT1G08320.2	135	67	97	157	128	139	3.15988	0.234827	0.573737	bZIP transcription factor family protein
AT1G08320.3	153	76	110	188	149	170	3.36452	0.313311	0.360633	bZIP transcription factor family protein
AT1G08340.1	132	81	91	156	113	115	2.85451	0.0683743	0.962778	Rho GTPase activating protein with PAK-box/P21-Rho-binding domain
AT1G08350.1	145	113	157	204	176	170	3.51893	0.135748	0.618371	Endomembrane protein 70 protein family
AT1G08350.2	152	119	163	207	182	174	3.55601	0.104719	0.74578	Endomembrane protein 70 protein family
AT1G08360.1	3702	3828	3493	4746	5328	4298	8.14891	0.113367	0.176522	Ribosomal protein L1p/L10e family
AT1G08370.1	377	312	369	418	456	339	4.90189	-0.0775786	0.686857	decapping 1
AT1G08380.1	19834	24184	19534	26222	33479	24118	11.033	0.128928	0.163879	photosystem I subunit O
AT1G08390.1	70	87	70	71	100	71	2.69552	-0.17601	0.511363	unknown protein
AT1G08400.1	111	101	89	104	119	88	2.90595	-0.222358	0.318076	RINT-1 / TIP-1 family
AT1G08410.1	296	293	298	323	289	292	4.45138	-0.238746	0.048672	P-loop containing nucleoside triphosphate hydrolases superfamily protein
AT1G08420.1	813	747	727	984	936	815	5.96684	-0.0107337	1	BRI1 suppressor 1 (BSU1)-like 2
AT1G08420.2	798	746	720	984	937	816	5.95742	0.00509022	1	BRI1 suppressor 1 (BSU1)-like 2
AT1G08430.1	140	57	104	149	112	119	3.19809	0.0616018	1	aluminum-activated malate transporter 1
AT1G08440.1	5	8	5	4	6	3	-0.731223	-0.720395	0.602041	Aluminium activated malate transporter family protein
AT1G08450.1	568	556	578	685	738	649	5.57479	0.0152785	1	calreticulin 3
AT1G08450.2	446	483	474	564	626	531	5.312	0.0262805	0.991011	calreticulin 3
AT1G08450.3	495	495	499	601	623	548	5.3651	-0.0172255	1	calreticulin 3
AT1G08460.1	206	206	199	300	299	235	4.18019	0.17911	0.187129	histone deacetylase 8
AT1G08465.1	123	138	99	163	204	148	3.51063	0.247798	0.268031	Plant-specific transcription factor YABBY family protein
AT1G08470.1	242	264	227	285	275	264	4.31317	-0.0971335	0.594771	strictosidine synthase-like 3
AT1G08480.1	919	738	801	1128	1187	932	6.06131	0.127351	0.299817	unknown protein
AT1G08490.1	563	706	581	751	739	616	5.63694	-0.0799214	0.531146	chloroplastic NIFS-like cysteine desulfurase
AT1G08500.1	111	55	68	130	111	88	2.59734	0.214126	0.647952	early nodulin-like protein 18
AT1G08510.1	1065	1106	1039	1637	1446	1429	6.47941	0.227608	0.00930555	fatty acyl-ACP thioesterases B
AT1G08520.1	2604	3524	2619	3450	3995	2938	7.81121	-0.0203086	0.999826	ALBINA 1
AT1G08530.1	134	156	126	166	180	146	3.47237	-0.0256926	1	unknown protein
AT1G08540.1	1455	1962	1539	1852	2066	1479	6.97397	-0.147197	0.163385	RNApolymerase sigma subunit 2
AT1G08550.1	433	646	502	671	797	500	5.87163	0.0421378	0.92609	non-photochemical quenching 1
AT1G08550.2	420	631	501	647	781	477	5.84213	0.0207607	1	non-photochemical quenching 1
AT1G08560.1	398	492	502	582	651	509	5.05749	0.0512447	0.93756	syntaxin of plants 111
AT1G08570.1	732	846	714	923	994	599	6.22366	-0.143886	0.312913	atypical CYS HIS rich thioredoxin 4
AT1G08570.2	628	743	604	790	865	520	6.02434	-0.138061	0.342747	atypical CYS HIS rich thioredoxin 4
AT1G08570.3	666	768	620	823	910	546	6.08589	-0.127495	0.407312	atypical CYS HIS rich thioredoxin 4
AT1G08570.4	658	757	615	816	903	543	6.07527	-0.121358	0.43985	atypical CYS HIS rich thioredoxin 4
AT1G08580.1	490	555	563	569	579	511	5.427	-0.223145	0.0681149	unknown protein
AT1G08590.1	316	202	213	351	268	259	4.05599	-0.0049235	1	Leucine-rich receptor-like protein kinase family protein
AT1G08600.1	648	585	673	691	668	562	5.57741	-0.261572	0.0171481	P-loop containing nucleoside triphosphate hydrolases superfamily protein
AT1G08600.2	655	582	685	693	673	573	5.59617	-0.260249	0.0209543	P-loop containing nucleoside triphosphate hydrolases superfamily protein
AT1G08600.3	665	595	695	710	682	586	5.61838	-0.255695	0.0227408	P-loop containing nucleoside triphosphate hydrolases superfamily protein
AT1G08600.4	664	595	686	702	681	580	5.60955	-0.25924	0.0187547	P-loop containing nucleoside triphosphate hydrolases superfamily protein
AT1G08610.1	85	117	106	148	126	102	3.27696	0.0186707	1	Pentatricopeptide repeat (PPR) superfamily protein
AT1G08620.1	518	499	499	531	612	468	5.32463	-0.184308	0.113852	Transcription factor jumonji (jmj) family protein / zinc finger (C5HC2 type) family protein
AT1G08620.2	532	508	502	551	623	483	5.359	-0.167699	0.150946	Transcription factor jumonji (jmj) family protein / zinc finger (C5HC2 type) family protein
AT1G08630.1	14	17	8	71	8	28	1.34492	1.20216	0.0479965	threonine aldolase 1
AT1G08630.2	13	16	8	74	8	27	1.33726	1.30147	0.0306695	threonine aldolase 1
AT1G08630.3	13	15	8	71	8	28	1.35577	1.3143	0.0236974	threonine aldolase 1
AT1G08630.4	12	15	8	67	8	25	1.27339	1.25545	0.031498	threonine aldolase 1
AT1G08630.5	11	15	7	62	6	25	1.1398	1.24148	0.054587	threonine aldolase 1
AT1G08640.1	898	1199	907	1176	1356	902	6.34665	-0.0789051	0.583739	Chloroplast J-like domain 1
AT1G08650.1	396	320	379	433	458	355	5.07108	-0.089384	0.729702	phosphoenolpyruvate carboxylase kinase 1
AT1G08650.2	307	233	265	330	329	244	4.59171	-0.11081	0.677066	phosphoenolpyruvate carboxylase kinase 1
AT1G08660.1	337	355	319	429	481	381	4.88204	0.0836362	0.603725	MALE GAMETOPHYTE DEFECTIVE 2
AT1G08660.2	345	361	313	434	487	385	4.90932	0.0891973	0.565344	MALE GAMETOPHYTE DEFECTIVE 2
AT1G08670.1	39	13	24	37	35	36	1.17575	0.234594	0.8105	ENTH/VHS family protein
AT1G08680.1	507	514	496	579	643	543	5.29636	-0.0500359	0.815504	ARF GAP-like zinc finger-containing protein ZIGA4
AT1G08680.2	500	505	494	567	634	531	5.27209	-0.0604232	0.743429	ARF GAP-like zinc finger-containing protein ZIGA4
AT1G08680.3	472	473	455	537	614	495	5.18584	-0.0360173	0.911809	ARF GAP-like zinc finger-containing protein ZIGA4
AT1G08680.4	479	499	470	556	608	512	5.21964	-0.0573056	0.775392	ARF GAP-like zinc finger-containing protein ZIGA4
AT1G08700.1	368	338	339	440	470	348	4.80203	-0.00422092	1	Presenilin-1
AT1G08710.1	88	84	96	123	144	107	3.08602	0.209627	0.361034	F-box family protein
AT1G08710.2	75	71	88	98	129	92	2.80955	0.173744	0.582502	F-box family protein
AT1G08720.1	293	274	259	358	347	296	4.51804	0.00861683	1	Protein kinase superfamily protein
AT1G08730.1	23	26	18	30	29	18	0.981444	-0.068302	1	Myosin family protein with Dil domain
AT1G08750.1	173	164	149	194	213	175	3.68351	-0.00833128	1	Peptidase C13 family
AT1G08750.2	172	161	147	189	210	175	3.66821	-0.0102835	1	Peptidase C13 family
AT1G08750.3	188	178	163	206	222	187	3.78699	-0.0509038	0.902974	Peptidase C13 family
AT1G08760.1	263	233	214	302	283	277	4.23766	0.0142407	1	Plant protein of unknown function (DUF936)
AT1G08770.1	137	139	122	167	165	161	3.59364	0.0437676	0.979331	prenylated RAB acceptor 1.E
AT1G08780.1	262	246	255	300	346	288	4.42884	0.0226956	1	ABI3-interacting protein 3
AT1G08800.1	313	253	310	333	296	303	4.50508	-0.178374	0.364678	Protein of unknown function, DUF593
AT1G08800.2	316	259	315	340	300	312	4.52801	-0.169985	0.401643	Protein of unknown function, DUF593
AT1G08810.1	69	105	106	86	114	73	3.01263	-0.307754	0.134693	myb domain protein 60
AT1G08810.2	49	78	83	70	93	60	2.6557	-0.184726	0.532648	myb domain protein 60
AT1G08820.1	445	420	408	563	575	432	5.14107	0.0305431	0.971619	vamp/synaptobrevin-associated protein 27-2
AT1G08820.2	456	423	417	580	578	447	5.17071	0.0366999	0.934845	vamp/synaptobrevin-associated protein 27-2
AT1G08830.1	280	237	252	341	412	381	4.66525	0.294139	0.201794	copper/zinc superoxide dismutase 1
AT1G08830.2	258	206	218	291	353	324	4.4794	0.238612	0.36111	copper/zinc superoxide dismutase 1
AT1G08840.1	98	118	119	133	152	129	3.33264	0.0370805	1	DNA replication helicase, putative
AT1G08840.2	107	142	132	152	167	146	3.49821	0.0202123	1	DNA replication helicase, putative
AT1G08845.1	52	76	54	90	102	84	2.57361	0.333213	0.134627	Ribosomal L18p/L5e family protein
AT1G08845.2	44	64	45	81	92	72	2.35491	0.410939	0.069912	Ribosomal L18p/L5e family protein
AT1G08860.1	1	1	1	1	1	2	-1.50235	0.137676	1	Calcium-dependent phospholipid-binding Copine family protein
AT1G08880.1	919	991	843	998	1153	873	6.27193	-0.134252	0.121446	Histone superfamily protein
AT1G08890.1	172	101	155	227	178	160	3.7995	0.123855	0.79014	Major facilitator superfamily protein
AT1G08900.1	102	140	99	187	210	192	3.5004	0.52675	0.00314515	Major facilitator superfamily protein
AT1G08900.2	106	142	105	192	214	199	3.5689	0.515433	0.00322303	Major facilitator superfamily protein
AT1G08900.3	103	132	100	189	203	188	3.49937	0.529071	0.0026542	Major facilitator superfamily protein
AT1G08910.1	228	269	271	366	362	317	4.65736	0.175995	0.25456	zinc ion binding;zinc ion binding
AT1G08920.1	401	278	269	640	450	417	4.78755	0.398483	0.0350117	ERD (early response to dehydration) six-like 1
AT1G08920.2	381	262	252	603	423	395	4.70127	0.39706	0.0423363	ERD (early response to dehydration) six-like 1
AT1G08920.3	332	223	216	503	357	341	4.43555	0.37043	0.0631337	ERD (early response to dehydration) six-like 1
AT1G08930.1	688	554	553	1298	705	2869	5.78954	1.24159	0.00011975	Major facilitator superfamily protein
AT1G08930.2	688	553	552	1297	704	2866	5.78778	1.24171	0.000121189	Major facilitator superfamily protein
AT1G08940.1	108	69	68	124	104	115	3.05018	0.221477	0.473111	Phosphoglycerate mutase family protein
AT1G08960.1	175	176	157	182	180	142	3.61543	-0.280575	0.0778077	cation exchanger 11
AT1G08970.1	379	349	354	472	544	373	5.02942	0.0858524	0.634063	nuclear factor Y, subunit C9
AT1G08970.2	410	407	391	519	583	404	5.18692	0.0444672	0.896182	nuclear factor Y, subunit C9
AT1G08970.3	404	394	382	494	574	396	5.14699	0.0371939	0.94924	nuclear factor Y, subunit C9
AT1G08970.4	380	386	364	480	514	370	5.09223	-0.000706911	1	nuclear factor Y, subunit C9
AT1G08980.1	151	237	186	341	403	329	4.33481	0.636269	2.29e-08	amidase 1
AT1G08990.1	172	69	95	141	144	157	3.07212	0.129589	0.839572	plant glycogenin-like starch initiation protein 5
AT1G09000.1	86	69	104	110	94	67	2.84131	-0.211647	0.463221	NPK1-related protein kinase 1
AT1G09010.1	882	998	826	1232	1255	1120	6.2091	0.150339	0.105928	glycoside hydrolase family 2 protein
AT1G09020.1	721	666	658	828	785	674	5.7181	-0.108207	0.392991	homolog of yeast sucrose nonfermenting 4
AT1G09030.1	0	0	0	1	1	0	-2.41072	2.54952	0.814862	nuclear factor Y, subunit B4
AT1G09040.1	84	84	78	84	79	73	2.60981	-0.326669	0.160693	unknown protein
AT1G09050.1	72	58	71	81	79	67	2.56662	-0.0946067	0.85477	unknown protein
AT1G09060.1	554	565	495	702	699	680	5.56146	0.102903	0.380661	Zinc finger, RING-type;Transcription factor jumonji/aspartyl beta-hydroxylase
AT1G09060.2	565	570	507	714	707	689	5.58361	0.0978089	0.404759	Zinc finger, RING-type;Transcription factor jumonji/aspartyl beta-hydroxylase
AT1G09060.3	554	567	495	704	700	682	5.5641	0.104683	0.369697	Zinc finger, RING-type;Transcription factor jumonji/aspartyl beta-hydroxylase
AT1G09070.1	794	837	767	1423	1111	1575	6.225	0.530343	5.2e-05	soybean gene regulated by cold-2
AT1G09080.1	2	7	4	19	3	8	-0.0805752	0.942006	0.52669	Heat shock protein 70 (Hsp 70) family protein
AT1G09080.2	3	7	4	21	3	9	-0.0344195	0.974466	0.522745	Heat shock protein 70 (Hsp 70) family protein
AT1G09090.1	98	38	93	141	102	170	2.725	0.591058	0.10516	respiratory burst oxidase homolog B
AT1G09090.2	100	41	99	150	106	174	2.77678	0.580516	0.11074	respiratory burst oxidase homolog B
AT1G09100.1	405	320	337	457	428	370	4.84244	-0.0296874	1	26S proteasome AAA-ATPase subunit RPT5B
AT1G09130.1	1787	2275	1739	2253	2491	1896	7.33566	-0.072601	0.521151	ATP-dependent caseinolytic (Clp) protease/crotonase family protein
AT1G09130.2	1491	1925	1516	1904	2093	1601	7.06772	-0.0851181	0.458179	ATP-dependent caseinolytic (Clp) protease/crotonase family protein
AT1G09130.3	1543	1989	1557	1990	2174	1644	7.1299	-0.0775878	0.510028	ATP-dependent caseinolytic (Clp) protease/crotonase family protein
AT1G09140.1	847	811	774	1054	1058	935	6.15061	0.0576226	0.670618	SERINE-ARGININE PROTEIN 30
AT1G09140.2	956	924	893	1209	1206	1062	6.362	0.0584792	0.650181	SERINE-ARGININE PROTEIN 30
AT1G09150.1	349	406	377	464	506	423	4.98924	0.0312422	0.973414	pseudouridine synthase and archaeosine transglycosylase (PUA) domain-containing protein
AT1G09155.1	15	8	11	13	18	13	0.214048	0.0986112	1	phloem protein 2-B15
AT1G09157.1	1	2	0	0	1	0	-2.5666	-1.51225	0.910411	Protein of unknown function (DUF679)
AT1G09160.1	357	388	415	489	511	508	4.99712	0.113313	0.431396	Protein phosphatase 2C family protein
AT1G09160.2	340	377	394	469	491	494	4.92473	0.123688	0.384383	Protein phosphatase 2C family protein
AT1G09170.1	75	51	48	68	69	65	1.91945	-0.0513238	1	P-loop nucleoside triphosphate hydrolases superfamily protein with CH (Calponin Homology) domain
AT1G09176.1	7	1	3	3	5	2	-1.53362	-0.399062	0.951571	unknown protein
AT1G09180.1	25	35	22	17	20	17	1.24555	-0.864088	0.0121346	secretion-associated RAS super family 1
AT1G09190.1	35	37	39	49	48	21	1.58388	-0.18814	0.714131	Tetratricopeptide repeat (TPR)-like superfamily protein
AT1G09195.1	57	39	54	65	64	45	2.24121	-0.0582951	1	unknown protein
AT1G09195.2	78	57	62	85	70	51	2.50286	-0.208051	0.529159	unknown protein
AT1G09200.1	1139	1217	1137	1311	1561	1214	6.67874	-0.0444797	0.843942	Histone superfamily protein
AT1G09210.1	2585	2449	2490	3028	3050	2737	7.6046	-0.0396091	0.843369	calreticulin 1b
AT1G09220.1	13	16	17	12	15	24	0.689861	-0.115134	1	Pentatricopeptide repeat (PPR) superfamily protein
AT1G09230.1	238	208	194	227	253	199	4.27168	-0.184285	0.23934	RNA-binding (RRM/RBD/RNP motifs) family protein
AT1G09240.1	57	49	55	44	12	29	2.3402	-1.17966	5.14e-05	nicotianamine synthase 3
AT1G09250.1	256	281	245	265	261	246	4.39691	-0.283882	0.0260969	basic helix-loop-helix (bHLH) DNA-binding superfamily protein
AT1G09260.1	0	0	0	0	0	0	-2.70405	0	1	Chaperone DnaJ-domain superfamily protein
AT1G09270.1	1031	926	948	1189	1082	1042	6.24966	-0.0767951	0.641825	importin alpha isoform 4
AT1G09270.2	955	863	866	1086	987	946	6.10947	-0.0965403	0.531146	importin alpha isoform 4
AT1G09270.3	981	888	898	1145	1033	989	6.18621	-0.0716961	0.676116	importin alpha isoform 4
AT1G09280.1	210	239	232	345	333	313	4.27719	0.274402	0.0143696	unknown protein
AT1G09290.1	142	155	138	196	201	158	3.64217	0.0823797	0.795612	unknown protein
AT1G09300.1	134	131	107	161	158	128	3.40965	-0.00331547	1	Metallopeptidase M24 family protein
AT1G09300.2	152	154	120	186	187	143	3.58668	0.00786935	1	Metallopeptidase M24 family protein
AT1G09310.1	7924	10427	8032	11304	12957	9212	9.94215	0.0730886	0.661014	Protein of unknown function, DUF538
AT1G09320.1	92	98	82	136	99	108	3.05234	0.0694011	0.890201	agenet domain-containing protein
AT1G09330.1	442	425	352	537	566	501	5.13803	0.129817	0.250766	unknown protein
AT1G09340.1	13915	17866	13844	16030	19344	13902	10.2239	-0.158591	0.0571854	chloroplast RNA binding
AT1G09350.1	29	20	27	15	10	7	1.13008	-1.51015	0.000157464	galactinol synthase 3
AT1G09370.1	0	0	0	0	0	1	-1.99249	1.7842	1	Plant invertase/pectin methylesterase inhibitor superfamily protein
AT1G09380.1	3	2	4	4	3	8	-1.36698	0.459751	0.857067	nodulin MtN21 /EamA-like transporter family protein
AT1G09390.1	144	190	138	255	299	253	3.92095	0.507418	6.24e-06	GDSL-like Lipase/Acylhydrolase superfamily protein
AT1G09400.1	1	2	1	2	2	7	-1.52546	1.13723	0.472313	FMN-linked oxidoreductases superfamily protein
AT1G09410.1	13	17	15	14	16	8	0.437563	-0.508852	0.373083	pentatricopeptide (PPR) repeat-containing protein
AT1G09415.1	88	126	97	160	189	131	3.33043	0.356494	0.0217294	NIM1-interacting 3
AT1G09420.1	132	110	93	178	152	152	3.28482	0.259549	0.18306	glucose-6-phosphate dehydrogenase 4
AT1G09420.2	129	107	92	169	151	148	3.2529	0.246839	0.197507	glucose-6-phosphate dehydrogenase 4
AT1G09430.1	823	785	753	1092	934	1011	5.91469	0.10241	0.503205	ATP-citrate lyase A-3
AT1G09440.1	95	142	113	179	164	164	3.39383	0.271656	0.157684	Protein kinase superfamily protein
AT1G09450.1	71	79	68	76	100	81	2.64501	-0.0302031	1	Protein kinase superfamily protein
AT1G09460.1	69	49	74	152	147	198	2.54839	1.11391	1.34e-06	Carbohydrate-binding X8 domain superfamily protein
AT1G09470.1	95	134	107	111	111	91	3.12156	-0.368835	0.0602158	unknown protein
AT1G09470.2	94	118	104	110	101	93	3.03592	-0.321661	0.146141	unknown protein
AT1G09480.1	14	19	18	24	14	12	0.799608	-0.295373	0.686064	NAD(P)-binding Rossmann-fold superfamily protein
AT1G09483.1	12	11	3	12	12	7	-0.514355	-0.0142796	1	unknown protein
AT1G09486.1	167	180	186	193	199	160	3.7334	-0.218958	0.140121	pseudogene
AT1G09490.1	279	393	319	450	428	334	4.93875	0.0220463	1	NAD(P)-binding Rossmann-fold superfamily protein
AT1G09490.2	231	321	273	374	344	282	4.70076	0.00963957	1	NAD(P)-binding Rossmann-fold superfamily protein
AT1G09500.1	21	35	17	88	29	35	2.21223	0.800394	0.22679	NAD(P)-binding Rossmann-fold superfamily protein
AT1G09500.2	20	32	18	83	28	34	2.17291	0.790802	0.265443	NAD(P)-binding Rossmann-fold superfamily protein
AT1G09500.3	19	27	14	69	22	30	1.87766	0.754493	0.273424	NAD(P)-binding Rossmann-fold superfamily protein
AT1G09510.1	0	0	0	0	0	0	-2.56586	0	1	NAD(P)-binding Rossmann-fold superfamily protein
AT1G09520.1	144	125	157	177	220	155	3.63215	0.0984491	0.777627	unknown protein
AT1G09530.1	130	172	138	204	207	154	3.66626	0.0917717	0.735705	phytochrome interacting factor 3
AT1G09530.2	128	165	137	200	200	150	3.64485	0.0859956	0.772446	phytochrome interacting factor 3
AT1G09540.1	54	20	27	45	38	31	1.25309	-0.100531	0.983504	myb domain protein 61
AT1G09560.1	2075	881	1154	2397	1884	1925	6.82995	0.322996	0.321357	germin-like protein 5
AT1G09570.1	1170	1081	1103	1812	1805	1892	6.39532	0.454861	7.92e-07	phytochrome A
AT1G09570.2	1114	1026	1066	1744	1741	1824	6.34218	0.466243	5.37e-07	phytochrome A
AT1G09575.1	30	26	28	74	70	80	1.37337	1.14826	8.68e-07	Protein of unknown function (DUF607)
AT1G09580.1	178	160	188	219	207	183	3.73904	-0.0579732	0.862989	emp24/gp25L/p24 family/GOLD family protein
AT1G09590.1	3953	3963	4051	5087	5465	4399	8.22428	0.0486176	0.777836	Translation protein SH3-like family protein
AT1G09600.1	42	37	39	32	44	40	1.37086	-0.291705	0.418938	Protein kinase superfamily protein
AT1G09610.1	23	14	16	21	19	22	0.573528	-0.0381035	1	Protein of unknown function (DUF579)
AT1G09620.1	2318	2532	2282	2752	2670	2406	7.33539	-0.130992	0.136593	ATP binding;leucine-tRNA ligases;aminoacyl-tRNA ligases;nucleotide binding;ATP binding;aminoacyl-tRNA ligases
AT1G09630.1	264	255	258	331	329	297	4.33407	0.032696	0.988166	RAB GTPase 11C
AT1G09640.1	3014	2834	2798	3545	3625	3050	7.78154	-0.0288022	0.860059	Translation elongation factor EF1B, gamma chain
AT1G09640.2	1828	1665	1682	2013	2099	1774	7.00756	-0.0844418	0.394285	Translation elongation factor EF1B, gamma chain
AT1G09645.1	173	152	159	229	247	224	3.79771	0.264459	0.0950388	unknown protein
AT1G09650.1	4	6	8	9	12	5	-0.357153	0.254345	1	F-box and associated interaction domains-containing protein
AT1G09660.1	409	407	415	640	635	583	5.23735	0.326615	0.000368378	RNA-binding KH domain-containing protein
AT1G09660.2	372	368	391	589	575	533	5.11873	0.317749	0.000986709	RNA-binding KH domain-containing protein
AT1G09665.1	0	0	0	0	0	0	-2.72217	0	1	Toll-Interleukin-Resistance (TIR) domain family protein
AT1G09680.1	18	25	24	24	25	26	0.770033	-0.103407	0.992689	Pentatricopeptide repeat (PPR) superfamily protein
AT1G09690.1	5129	5412	5341	7069	7809	6121	8.68185	0.130207	0.202769	Translation protein SH3-like family protein
AT1G09700.1	230	277	233	395	435	340	4.61743	0.392069	0.00163683	dsRNA-binding domain-like superfamily protein
AT1G09710.1	77	79	71	111	138	100	2.93621	0.350087	0.0823715	Homeodomain-like superfamily protein
AT1G09710.2	70	68	66	102	115	94	2.7915	0.339074	0.113153	Homeodomain-like superfamily protein
AT1G09720.1	0	0	0	0	0	0	-2.70405	0	1	Kinase interacting (KIP1-like) family protein
AT1G09730.1	446	404	397	543	598	486	5.10223	0.113705	0.413346	Cysteine proteinases superfamily protein
AT1G09730.2	458	414	401	555	601	497	5.13035	0.107368	0.451856	Cysteine proteinases superfamily protein
AT1G09740.1	748	366	546	830	675	747	5.47878	0.170671	0.627999	Adenine nucleotide alpha hydrolases-like superfamily protein
AT1G09750.1	1436	2047	1425	2012	2368	1977	6.91888	0.113341	0.522471	Eukaryotic aspartyl protease family protein
AT1G09760.1	576	597	609	771	872	691	5.67431	0.118002	0.34303	U2 small nuclear ribonucleoprotein A
AT1G09770.1	1456	1428	1489	1848	1918	1676	6.82154	0.0462317	0.794648	cell division cycle 5
AT1G09780.1	3400	2703	3151	3416	3294	2869	7.70111	-0.223606	0.0332035	Phosphoglycerate mutase, 2,3-bisphosphoglycerate-independent
AT1G09790.1	0	1	1	0	3	3	-2.21853	1.18933	0.625325	COBRA-like protein 6 precursor
AT1G09794.1	39	37	34	48	53	40	1.68033	0.0879911	0.990771	Cox19 family protein (CHCH motif)
AT1G09795.1	705	827	755	920	1059	777	5.8952	-0.00330234	1	ATP phosphoribosyl transferase 2
AT1G09800.1	62	62	71	83	95	80	2.65343	0.134887	0.718587	Pseudouridine synthase family protein
AT1G09810.1	112	134	143	166	187	157	3.55122	0.121773	0.585771	evolutionarily conserved C-terminal region 11
AT1G09812.1	6	7	10	3	10	11	-0.15778	-0.202536	1	unknown protein
AT1G09815.1	238	242	227	286	348	264	4.41971	0.0751201	0.731539	polymerase delta 4
AT1G09820.1	89	96	85	101	118	77	2.91143	-0.13861	0.650623	Pentatricopeptide repeat (PPR-like) superfamily protein
AT1G09830.1	513	621	532	620	535	461	5.40681	-0.311094	0.000996351	Glycinamide ribonucleotide (GAR) synthetase
AT1G09840.1	574	509	511	675	680	599	5.48289	0.025273	0.976028	shaggy-like protein kinase 41
AT1G09840.2	557	486	489	649	658	581	5.44032	0.032972	0.927372	shaggy-like protein kinase 41
AT1G09840.3	551	477	488	641	652	578	5.42582	0.0349835	0.91489	shaggy-like protein kinase 41
AT1G09840.4	545	482	482	640	645	579	5.42062	0.0368519	0.89973	shaggy-like protein kinase 41
AT1G09840.5	543	474	481	635	642	578	5.41425	0.0403343	0.878534	shaggy-like protein kinase 41
AT1G09840.6	543	474	480	635	642	578	5.41372	0.0413226	0.870209	shaggy-like protein kinase 41
AT1G09850.1	368	356	399	467	513	393	4.94553	0.0171621	1	xylem bark cysteine peptidase 3
AT1G09860.1	1	2	0	0	0	4	-1.49388	0.141934	1	purine permease 16
AT1G09870.1	317	314	279	403	403	367	4.68194	0.0998286	0.520031	histidine acid phosphatase family protein
AT1G09880.1	24	18	22	28	15	11	0.658469	-0.521103	0.520253	Rhamnogalacturonate lyase family protein
AT1G09890.1	55	62	54	84	71	52	2.12176	0.00568243	1	Rhamnogalacturonate lyase family protein
AT1G09900.1	275	354	287	322	309	238	4.57632	-0.344475	0.00512266	Pentatricopeptide repeat (PPR-like) superfamily protein
AT1G09910.1	196	177	168	216	227	226	3.92042	0.0419178	0.965495	Rhamnogalacturonate lyase family protein
AT1G09920.1	337	331	268	426	428	337	4.87083	0.0786446	0.769423	TRAF-type zinc finger-related
AT1G09930.1	0	0	1	0	3	0	-2.24482	1.06963	0.911339	oligopeptide transporter 2
AT1G09932.1	25	39	45	36	56	62	1.95115	0.2399	0.763867	Phosphoglycerate mutase family protein
AT1G09932.2	23	38	39	32	49	58	1.86833	0.220769	0.811	Phosphoglycerate mutase family protein
AT1G09940.1	253	244	221	352	352	315	4.24218	0.237823	0.0408751	Glutamyl-tRNA reductase family protein
AT1G09950.1	8	4	10	9	11	12	-0.381244	0.268019	0.89963	RESPONSE TO ABA AND SALT 1
AT1G09960.1	124	97	99	144	149	123	3.11414	0.108555	0.761149	sucrose transporter 4
AT1G09970.1	1954	1439	1605	2541	2091	2415	7.07569	0.234852	0.125408	Leucine-rich receptor-like protein kinase family protein
AT1G09970.2	1890	1393	1568	2447	2006	2342	7.02342	0.225668	0.151057	Leucine-rich receptor-like protein kinase family protein
AT1G09980.1	493	490	471	544	512	463	5.26018	-0.204373	0.0544727	Putative serine esterase family protein
AT1G09980.2	481	480	461	532	505	457	5.2374	-0.196131	0.0694726	Putative serine esterase family protein
AT1G09995.1	35	30	46	45	64	44	1.63546	0.190619	0.71429	DNA repair DEAD helicase RAD3/XP-D subfamily protein
AT1G10000.1	5	15	4	21	18	14	-0.202738	0.871775	0.163378	Ribonuclease H-like superfamily protein
AT1G10010.1	1	0	0	0	0	1	-2.45574	-0.191343	1	amino acid permease 8
AT1G10020.1	214	221	188	678	649	727	4.18832	1.46518	8.41e-32	Protein of unknown function (DUF1005)
AT1G10030.1	218	180	208	348	318	293	4.01534	0.392692	0.004126	homolog of yeast ergosterol28
AT1G10040.1	53	43	57	55	51	52	2.08336	-0.22162	0.555134	alpha/beta-Hydrolases superfamily protein
AT1G10040.2	48	41	52	51	44	50	1.95616	-0.226006	0.565517	alpha/beta-Hydrolases superfamily protein
AT1G10050.1	240	150	198	264	230	234	3.98366	0.0388167	1	glycosyl hydrolase family 10 protein / carbohydrate-binding domain-containing protein
AT1G10060.1	82	140	91	88	86	62	3.68361	-0.672667	0.000453839	branched-chain amino acid transaminase 1
AT1G10060.2	97	152	101	101	97	70	3.84194	-0.651207	0.000156294	branched-chain amino acid transaminase 1
AT1G10060.3	88	133	90	87	88	64	3.67378	-0.646079	0.000289181	branched-chain amino acid transaminase 1
AT1G10070.1	28	28	27	124	50	69	1.74563	1.28489	0.000193758	branched-chain amino acid transaminase 2
AT1G10070.2	28	27	27	123	50	63	1.72155	1.25683	0.000368378	branched-chain amino acid transaminase 2
AT1G10070.3	27	27	27	122	48	63	1.70374	1.25699	0.000464356	branched-chain amino acid transaminase 2
AT1G10090.1	329	302	326	351	415	297	4.84075	-0.122452	0.440654	Early-responsive to dehydration stress protein (ERD4)
AT1G10095.1	156	126	117	219	203	225	3.67215	0.439858	0.451196	Protein prenylyltransferase superfamily protein
AT1G10100.1	0	0	0	1	1	0	-2.59986	2.55383	0.8105	unknown protein
AT1G10110.1	7	9	9	11	4	8	-0.278346	-0.381325	0.796179	F-box family protein
AT1G10120.1	289	255	263	428	431	386	4.53372	0.357237	0.000655432	basic helix-loop-helix (bHLH) DNA-binding superfamily protein
AT1G10130.1	672	637	650	751	722	660	5.65453	-0.145123	0.158491	endoplasmic reticulum-type calcium-transporting ATPase 3
AT1G10140.1	110	89	74	224	185	202	3.28453	0.900705	2.12e-07	Uncharacterised conserved protein UCP031279
AT1G10150.1	168	211	163	400	382	303	4.29834	0.73282	2.92e-11	Carbohydrate-binding protein
AT1G10155.1	6	7	2	11	9	4	0.0312626	0.401202	0.745745	phloem protein 2-A10
AT1G10170.1	641	642	638	812	722	688	5.57535	-0.0564139	0.798879	NF-X-like 1
AT1G10180.1	382	410	398	429	424	370	4.94929	-0.228672	0.0318046	unknown protein
AT1G10200.1	632	577	618	849	931	807	5.75702	0.232614	0.0039879	GATA type zinc finger transcription factor family protein
AT1G10210.1	56	49	66	90	96	73	2.44085	0.326999	0.185873	mitogen-activated protein kinase 1
AT1G10210.2	51	46	61	83	95	70	2.39488	0.379116	0.103724	mitogen-activated protein kinase 1
AT1G10220.1	3	3	5	9	6	5	-0.791281	0.577798	0.702934	unknown protein
AT1G10220.2	0	1	0	2	0	0	-2.41107	0.57864	1	unknown protein
AT1G10230.1	105	147	129	162	152	154	3.45418	0.0338523	1	SKP1-like 18
AT1G10240.1	115	127	130	190	164	141	3.47333	0.143043	0.513441	FAR1-related sequence 11
AT1G10250.1	7	5	4	7	9	7	-0.408088	0.250176	0.999004	unknown protein
AT1G10270.1	259	257	258	294	243	221	4.31251	-0.298687	0.0341091	glutamine-rich protein 23
AT1G10280.1	80	100	81	81	109	71	2.78262	-0.269559	0.219541	Core-2/I-branching beta-1,6-N-acetylglucosaminyltransferase family protein
AT1G10290.1	1513	1515	1454	1576	1598	1427	6.7482	-0.229209	0.00500503	dynamin-like protein 6
AT1G10300.1	28	21	39	20	27	29	0.957208	-0.47916	0.280668	Nucleolar GTP-binding protein
AT1G10310.1	281	313	247	327	351	281	4.6366	-0.0780147	0.739821	NAD(P)-binding Rossmann-fold superfamily protein
AT1G10320.1	154	184	174	229	207	176	4.01004	-0.0112596	1	Zinc finger C-x8-C-x5-C-x3-H type family protein
AT1G10330.1	25	27	22	26	30	23	1.07858	-0.17332	0.870705	Tetratricopeptide repeat (TPR)-like superfamily protein
AT1G10340.1	45	10	32	34	30	32	1.46239	-0.136112	0.997139	Ankyrin repeat family protein
AT1G10340.2	43	9	30	31	28	29	1.38162	-0.177235	0.95491	Ankyrin repeat family protein
AT1G10350.1	189	182	190	212	218	172	3.96072	-0.168164	0.28646	DNAJ heat shock family protein
AT1G10360.1	433	470	397	525	615	459	5.25268	0.0289645	0.967421	glutathione S-transferase TAU 18
AT1G10370.1	1259	1545	1129	1237	1538	940	6.79274	-0.357377	0.00389381	Glutathione S-transferase family protein
AT1G10380.1	183	127	148	234	210	171	3.98352	0.150739	0.630942	Putative membrane lipoprotein
AT1G10385.1	4	3	6	1	2	3	-1.60756	-1.3259	0.247315	Vps51/Vps67 family (components of vesicular transport) protein
AT1G10390.1	1157	1075	1106	1316	1275	1181	6.48844	-0.0910685	0.47908	Nucleoporin autopeptidase
AT1G10390.2	1169	1075	1110	1334	1279	1190	6.49664	-0.0861578	0.522024	Nucleoporin autopeptidase
AT1G10400.1	9	11	16	11	7	18	0.0867901	-0.247636	0.937253	UDP-Glycosyltransferase superfamily protein
AT1G10410.1	518	409	439	574	576	523	5.44116	0.0237706	1	Protein of unknown function (DUF1336)
AT1G10417.1	10	8	11	10	9	10	0.322827	-0.264522	0.850486	unknown protein
AT1G10430.1	323	312	324	357	346	306	4.63543	-0.195349	0.0821273	protein phosphatase 2A-2
AT1G10450.1	426	406	379	494	500	399	4.98628	-0.0677836	0.681688	SIN3-like 6
AT1G10455.1	0	0	1	1	1	0	-2.65091	0.573796	1	unknown protein
AT1G10460.1	31	18	27	30	26	24	0.884478	-0.19592	0.805559	germin-like protein 7
AT1G10470.1	1619	1234	1273	1703	1560	1363	6.82039	-0.106099	0.569031	response regulator 4
AT1G10480.1	68	34	62	120	77	79	2.48665	0.475169	0.166659	zinc finger protein 5
AT1G10490.1	640	685	631	765	717	588	5.70308	-0.18792	0.0824559	Domain of unknown function (DUF1726) ;Putative ATPase (DUF699)
AT1G10500.1	644	721	566	909	930	699	5.98029	0.124814	0.312599	chloroplast-localized ISCA-like protein
AT1G10510.1	721	910	720	858	1011	780	5.90536	-0.0953591	0.389391	RNI-like superfamily protein
AT1G10520.1	25	31	21	44	41	24	1.43361	0.229528	0.678639	DNA polymerase lambda (POLL)
AT1G10522.1	289	438	345	384	453	313	4.80897	-0.168878	0.300739	unknown protein
AT1G10522.2	323	463	356	435	494	367	4.9283	-0.0853799	0.832175	unknown protein
AT1G10530.1	36	26	29	37	44	46	1.06722	0.212845	0.643972	unknown protein
AT1G10540.1	6	11	10	7	8	10	0.152004	-0.373378	0.805154	nucleobase-ascorbate transporter 8
AT1G10550.1	22	11	18	40	17	221	0.461034	2.27237	0.00574134	xyloglucan:xyloglucosyl transferase 33
AT1G10560.1	56	13	29	52	38	51	1.31457	0.257769	0.737891	plant U-box 18
AT1G10570.1	210	225	216	281	283	250	4.31231	0.0547208	0.887036	Cysteine proteinases superfamily protein
AT1G10570.2	213	227	215	283	288	255	4.31943	0.0671734	0.8105	Cysteine proteinases superfamily protein
AT1G10580.1	537	539	547	565	549	434	5.37316	-0.339838	0.00015415	Transducin/WD40 repeat-like superfamily protein
AT1G10585.1	8	13	6	16	3	6	0.365827	-0.356139	0.946042	basic helix-loop-helix (bHLH) DNA-binding superfamily protein
AT1G10586.1	0	0	0	0	0	0	-2.65101	0	1	basic helix-loop-helix (bHLH) DNA-binding superfamily protein
AT1G10586.2	0	0	0	0	0	0	-2.6685	0	1	basic helix-loop-helix (bHLH) DNA-binding superfamily protein
AT1G10590.1	865	907	923	1175	1330	1012	6.21806	0.111412	0.253813	Nucleic acid-binding, OB-fold-like protein
AT1G10590.2	839	875	899	1151	1287	987	6.17396	0.117835	0.219579	Nucleic acid-binding, OB-fold-like protein
AT1G10590.3	836	875	896	1148	1288	984	6.17091	0.119006	0.211815	Nucleic acid-binding, OB-fold-like protein
AT1G10600.1	120	174	132	185	222	185	3.81751	0.208814	0.233174	associated molecule with the SH3 domain of STAM 2
AT1G10600.2	109	151	117	168	201	159	3.66751	0.218456	0.221203	associated molecule with the SH3 domain of STAM 2
AT1G10600.3	114	161	124	171	208	169	3.69753	0.191385	0.349331	associated molecule with the SH3 domain of STAM 2
AT1G10610.1	90	76	77	108	122	99	3.00606	0.167699	0.531013	basic helix-loop-helix (bHLH) DNA-binding superfamily protein
AT1G10620.1	0	1	1	0	0	0	-2.61645	-2.78192	0.8105	Protein kinase superfamily protein
AT1G10630.1	886	704	784	1045	1104	930	6.01462	0.103423	0.391302	ADP-ribosylation factor A1F
AT1G10640.1	365	542	460	344	436	202	5.33943	-0.76206	1.95e-07	Pectin lyase-like superfamily protein
AT1G10650.1	271	313	287	315	324	223	4.70223	-0.286429	0.00903156	SBP (S-ribonuclease binding protein) family protein
AT1G10650.2	254	298	274	301	301	212	4.63042	-0.292378	0.0112047	SBP (S-ribonuclease binding protein) family protein
AT1G10657.1	101	124	114	135	192	152	3.44014	0.230231	0.184784	Plant protein 1589 of unknown function
AT1G10657.2	111	150	136	150	230	180	3.64075	0.228015	0.193882	Plant protein 1589 of unknown function
AT1G10657.3	113	141	131	143	221	174	3.6269	0.214317	0.23401	Plant protein 1589 of unknown function
AT1G10657.4	96	122	109	120	178	152	3.36595	0.19367	0.33627	Plant protein 1589 of unknown function
AT1G10660.1	308	347	266	457	468	334	4.8081	0.180706	0.155503	unknown protein
AT1G10660.2	308	355	259	450	463	336	4.80513	0.168606	0.207949	unknown protein
AT1G10660.3	307	353	258	450	460	333	4.79351	0.16785	0.201662	unknown protein
AT1G10660.4	302	350	258	445	454	330	4.78531	0.164179	0.214325	unknown protein
AT1G10670.1	2971	2999	2838	3741	3750	3210	7.84512	0.0123653	1	ATP-citrate lyase A-1
AT1G10670.2	2903	2919	2773	3635	3677	3111	7.81336	0.00921915	1	ATP-citrate lyase A-1
AT1G10670.3	2843	2866	2687	3600	3586	3063	7.77839	0.0192596	0.959095	ATP-citrate lyase A-1
AT1G10670.4	2887	2911	2760	3626	3670	3103	7.8081	0.0121442	1	ATP-citrate lyase A-1
AT1G10680.1	10	9	5	11	7	4	-0.570929	-0.388232	0.796629	P-glycoprotein 10
AT1G10690.1	26	22	22	33	33	35	1.29355	0.259891	0.552767	unknown protein
AT1G10700.1	282	255	250	361	399	324	4.3437	0.192153	0.151711	phosphoribosyl pyrophosphate (PRPP) synthase 3
AT1G10710.1	3	4	6	2	3	2	-1.11922	-1.11998	0.388529	poor homologous synapsis 1
AT1G10710.2	3	5	6	2	3	3	-0.986945	-1.03795	0.425633	poor homologous synapsis 1
AT1G10720.1	233	238	240	340	335	254	4.37747	0.114959	0.480886	BSD domain-containing protein
AT1G10730.1	82	83	87	126	116	63	2.76945	-0.000813515	1	Clathrin adaptor complexes medium subunit family protein
AT1G10740.1	321	414	348	622	672	675	5.02722	0.601704	8e-12	alpha/beta-Hydrolases superfamily protein
AT1G10740.2	306	405	325	590	639	642	4.96142	0.592905	1.22e-10	alpha/beta-Hydrolases superfamily protein
AT1G10740.3	307	400	325	589	634	642	4.93796	0.594417	1.06e-09	alpha/beta-Hydrolases superfamily protein
AT1G10740.4	306	397	321	586	629	640	4.92826	0.598053	7.94e-10	alpha/beta-Hydrolases superfamily protein
AT1G10747.1	0	0	0	0	1	0	-2.72218	1.77789	1	Maternally expressed gene (MEG) family protein
AT1G10750.1	46	52	55	65	65	45	2.16238	-0.0771855	0.931714	Protein of Unknown Function (DUF239)
AT1G10760.1	1808	1921	1652	1771	1978	1417	7.58179	-0.331657	2.16e-05	Pyruvate phosphate dikinase, PEP/pyruvate binding domain
AT1G10770.1	0	0	0	1	0	1	-1.88698	2.55769	0.8105	Plant invertase/pectin methylesterase inhibitor superfamily protein
AT1G10780.1	94	123	110	125	132	112	3.14454	-0.0931951	0.793669	F-box/RNI-like superfamily protein
AT1G10790.1	18	8	8	7	13	6	-0.109021	-0.654776	0.391925	unknown protein
AT1G10800.1	8	10	6	6	9	8	-0.574995	-0.322505	0.876263	unknown protein
AT1G10810.1	37	21	26	49	24	41	1.08044	0.179019	0.841363	NAD(P)-linked oxidoreductase superfamily protein
AT1G10820.1	219	242	213	272	291	274	4.35558	0.0463832	0.8769	Protein of unknown function (DUF3755)
AT1G10820.2	234	255	220	290	311	294	4.43958	0.070724	0.748418	Protein of unknown function (DUF3755)
AT1G10830.1	343	381	309	379	441	335	4.72959	-0.107575	0.439086	15-cis-zeta-carotene isomerase
AT1G10830.2	315	348	286	359	391	311	4.58668	-0.107109	0.468279	15-cis-zeta-carotene isomerase
AT1G10840.1	1190	1281	1227	1621	1675	1455	6.58316	0.0937709	0.309457	translation initiation factor 3 subunit H1
AT1G10840.2	1027	1080	1056	1378	1426	1234	6.35636	0.0841103	0.392591	translation initiation factor 3 subunit H1
AT1G10850.1	468	455	451	454	501	366	5.24622	-0.327863	3.63e-05	Leucine-rich repeat protein kinase family protein
AT1G10865.1	145	154	138	234	188	185	3.67517	0.207986	0.232308	unknown protein
AT1G10865.2	114	117	110	194	149	144	3.36879	0.246879	0.180785	unknown protein
AT1G10870.1	336	343	337	419	434	353	4.82048	-0.0223092	1	ARF-GAP domain 4
AT1G10880.1	0	0	0	0	0	0	-2.68612	0	1	Core-2/I-branching beta-1,6-N-acetylglucosaminyltransferase family protein
AT1G10890.1	307	357	315	452	507	395	5.0784	0.198468	0.126667	unknown protein
AT1G10900.1	962	926	764	1026	1078	843	6.23088	-0.117052	0.291452	Phosphatidylinositol-4-phosphate 5-kinase family protein
AT1G10910.1	422	559	435	629	717	445	5.34295	0.0647669	0.780245	Pentatricopeptide repeat (PPR) superfamily protein
AT1G10920.1	81	105	93	121	118	97	3.22801	-4.76e-05	1	NB-ARC domain-containing disease resistance protein
AT1G10920.2	81	105	93	119	118	96	3.21883	-0.0130589	1	NB-ARC domain-containing disease resistance protein
AT1G10930.1	413	457	375	404	394	320	5.0249	-0.422884	5.9e-05	DNA helicase (RECQl4A)
AT1G10940.1	645	721	635	852	834	663	5.9926	-0.0381713	0.879716	Protein kinase superfamily protein
AT1G10940.2	590	671	591	784	764	612	5.88759	-0.0472972	0.821052	Protein kinase superfamily protein
AT1G10950.1	1901	1658	1659	1990	2084	1746	6.95351	-0.112958	0.22879	transmembrane nine 1
AT1G10960.1	5655	7281	5494	6367	7714	5725	8.82594	-0.163528	0.141546	ferredoxin 1
AT1G10970.1	110	101	71	169	159	100	2.82858	0.327694	0.179505	zinc transporter 4 precursor
AT1G10980.1	7	12	10	7	13	12	0.021143	-0.123612	1	Lung seven transmembrane receptor family protein
AT1G10990.1	36	34	40	61	64	96	1.73876	0.754967	0.0326752	unknown protein
AT1G10990.2	38	34	39	65	57	95	1.7649	0.71628	0.0274588	unknown protein
AT1G11000.1	148	109	114	176	176	153	3.33422	0.175502	0.432881	Seven transmembrane MLO family protein
AT1G11020.1	167	133	133	219	224	203	3.69135	0.30917	0.033421	RING/FYVE/PHD zinc finger superfamily protein
AT1G11040.1	1	0	1	1	0	1	-2.55008	-0.225351	1	HSP40/DnaJ peptide-binding protein
AT1G11050.1	120	115	128	186	134	185	3.5606	0.214685	0.27118	Protein kinase superfamily protein
AT1G11055.1	1	4	4	3	3	3	-1.0708	-0.257291	1	pseudogene
AT1G11060.1	232	210	214	292	277	212	4.23978	-0.0198452	1	WAPL (Wings apart-like protein regulation of heterochromatin) protein
AT1G11070.1	11	14	5	30	36	24	0.315957	1.30689	0.00160716	unknown protein
AT1G11080.1	261	154	237	335	467	415	4.15118	0.626122	0.00904934	serine carboxypeptidase-like 31
AT1G11080.2	237	141	225	319	426	386	4.02839	0.633173	0.0065009	serine carboxypeptidase-like 31
AT1G11090.1	137	178	129	128	176	120	3.71055	-0.33488	0.0348426	alpha/beta-Hydrolases superfamily protein
AT1G11100.1	62	34	42	59	52	64	1.9253	0.0799149	0.995639	SNF2 domain-containing protein / helicase domain-containing protein / zinc finger protein-related
AT1G11100.2	63	37	44	66	58	66	2.00836	0.134875	0.871568	SNF2 domain-containing protein / helicase domain-containing protein / zinc finger protein-related
AT1G11110.1	1	0	0	0	0	0	-2.56663	-1.97816	1	LisH and RanBPM domains containing protein
AT1G11112.1	12	21	20	12	21	17	0.768131	-0.349634	0.547344	unknown protein
AT1G11120.1	43	31	35	29	35	19	1.33351	-0.664972	0.0393563	unknown protein
AT1G11120.2	54	35	44	41	41	23	1.68254	-0.617221	0.0584708	unknown protein
AT1G11125.1	17	19	22	33	21	19	0.665293	0.0620685	1	unknown protein
AT1G11130.1	476	452	400	583	502	417	5.17414	-0.091789	0.603634	Leucine-rich repeat protein kinase family protein
AT1G11145.1	0	0	0	0	0	0	-2.70395	0	1	Protein of unknown function (DUF674)
AT1G11160.1	125	77	97	96	109	99	2.71977	-0.24575	0.336441	Transducin/WD40 repeat-like superfamily protein
AT1G11170.1	40	30	48	73	45	39	1.9297	0.136432	0.867911	Protein of unknown function (DUF707)
AT1G11170.2	31	29	47	67	41	32	1.80882	0.109565	0.960188	Protein of unknown function (DUF707)
AT1G11180.1	76	101	80	134	168	108	3.3774	0.401442	0.0477894	Secretory carrier membrane protein (SCAMP) family protein
AT1G11180.2	69	95	74	123	158	106	3.272	0.429992	0.0438373	Secretory carrier membrane protein (SCAMP) family protein
AT1G11190.1	90	79	73	130	110	83	2.85682	0.144321	0.739396	bifunctional nuclease i
AT1G11200.1	141	125	146	195	181	156	3.59451	0.0983828	0.751857	Protein of unknown function (DUF300)
AT1G11210.1	15	5	19	12	14	11	1.11044	-0.348899	0.680662	Protein of unknown function (DUF761)
AT1G11220.1	27	36	45	50	53	42	1.54859	0.154494	0.806833	Protein of unknown function (DUF761)
AT1G11230.1	0	0	0	0	0	0	-2.68603	0	1	Protein of unknown function (DUF761)
AT1G11230.2	0	0	0	0	0	0	-2.66828	0	1	Protein of unknown function (DUF761)
AT1G11240.1	336	343	312	445	449	393	4.87796	0.109828	0.502603	unknown protein
AT1G11250.1	0	3	2	1	1	0	-1.9494	-1.41663	0.775641	syntaxin of plants 125
AT1G11260.1	646	618	590	1644	1060	1760	6.00901	1.02513	5.95e-12	sugar transporter 1
AT1G11270.1	53	44	55	53	79	55	2.11839	0.0276865	1	F-box and associated interaction domains-containing protein
AT1G11270.2	59	45	58	58	96	59	2.22531	0.121427	0.820876	F-box and associated interaction domains-containing protein
AT1G11270.3	42	32	52	49	78	51	1.94695	0.222921	0.581127	F-box and associated interaction domains-containing protein
AT1G11280.1	418	390	360	499	494	466	5.04711	0.054919	0.782041	S-locus lectin protein kinase family protein
AT1G11280.2	430	399	371	512	500	471	5.07491	0.0393192	0.889965	S-locus lectin protein kinase family protein
AT1G11280.3	413	377	357	494	476	457	5.0113	0.0491136	0.821585	S-locus lectin protein kinase family protein
AT1G11280.4	401	368	346	481	470	452	4.98223	0.065611	0.707824	S-locus lectin protein kinase family protein
AT1G11290.1	61	75	76	104	99	73	2.62755	0.109949	0.8105	Pentatricopeptide repeat (PPR) superfamily protein
AT1G11300.1	159	189	145	227	193	179	3.99216	0.0155739	1	protein serine/threonine kinases;protein kinases;ATP binding;sugar binding;kinases;carbohydrate binding
AT1G11310.1	1270	1084	1092	1601	1508	1422	6.57454	0.128295	0.310981	Seven transmembrane MLO family protein
AT1G11310.2	1201	1014	1036	1510	1418	1351	6.48881	0.129894	0.315314	Seven transmembrane MLO family protein
AT1G11320.1	51	58	56	59	68	47	2.12861	-0.19407	0.619788	unknown protein
AT1G11330.1	203	180	199	167	177	199	3.92371	-0.362949	0.0284324	S-locus lectin protein kinase family protein
AT1G11330.2	208	184	202	175	177	202	3.95174	-0.363182	0.0277577	S-locus lectin protein kinase family protein
AT1G11340.1	15	24	21	8	19	11	1.03513	-0.920862	0.0290885	S-locus lectin protein kinase family protein
AT1G11350.1	221	237	189	258	287	277	4.16908	0.0820108	0.721802	S-domain-1 13
AT1G11360.1	265	263	218	381	365	296	4.47808	0.213487	0.111024	Adenine nucleotide alpha hydrolases-like superfamily protein
AT1G11360.2	243	238	200	344	325	265	4.31367	0.18708	0.202237	Adenine nucleotide alpha hydrolases-like superfamily protein
AT1G11360.3	261	254	210	361	360	286	4.41376	0.205	0.163698	Adenine nucleotide alpha hydrolases-like superfamily protein
AT1G11360.4	258	252	208	350	345	274	4.37216	0.163548	0.29262	Adenine nucleotide alpha hydrolases-like superfamily protein
AT1G11370.1	0	1	0	1	0	1	-2.61658	0.583164	1	Pectin lyase-like superfamily protein
AT1G11380.1	87	89	65	223	156	315	3.08127	1.29272	8.16e-10	PLAC8 family protein
AT1G11390.1	311	291	289	334	285	282	4.37117	-0.250551	0.0338743	Protein kinase superfamily protein
AT1G11400.1	179	204	193	289	304	251	4.11358	0.282532	0.0115949	partner of Y14-MAGO
AT1G11400.2	197	219	212	311	328	270	4.23349	0.264638	0.0198651	partner of Y14-MAGO
AT1G11400.3	169	191	176	273	283	240	4.04777	0.302238	0.00622251	partner of Y14-MAGO
AT1G11410.1	289	387	301	308	344	211	4.97634	-0.451955	0.000218022	S-locus lectin protein kinase family protein
AT1G11420.1	77	64	63	90	84	69	2.48419	-0.0171451	1	DOMAIN OF UNKNOWN FUNCTION 724 2
AT1G11430.1	1217	1577	1275	1548	1779	1263	6.73315	-0.097186	0.403398	plastid developmental protein DAG, putative
AT1G11440.1	125	150	106	145	200	99	3.59314	-0.0554168	0.948237	unknown protein
AT1G11450.1	89	69	77	103	82	67	2.87481	-0.170509	0.590736	nodulin MtN21 /EamA-like transporter family protein
AT1G11450.2	68	59	63	79	70	50	2.58852	-0.204756	0.53613	nodulin MtN21 /EamA-like transporter family protein
AT1G11460.1	9	10	12	10	16	9	0.419316	-0.0931256	1	nodulin MtN21 /EamA-like transporter family protein
AT1G11475.1	245	291	301	435	412	352	4.74765	0.248582	0.113797	RNA polymerases N / 8 kDa subunit
AT1G11480.1	757	682	695	1025	973	825	5.84334	0.132939	0.292465	eukaryotic translation initiation factor-related
AT1G11480.2	733	655	672	997	948	796	5.79348	0.140834	0.269841	eukaryotic translation initiation factor-related
AT1G11482.1	4	0	2	2	1	2	-1.98134	-0.497587	1	pseudogene
AT1G11490.1	6	1	3	8	5	7	-0.977166	0.714333	0.630338	zinc finger (C2H2 type) family protein
AT1G11500.1	5	0	7	8	4	3	-0.976276	0.0483343	1	Protein of unknown function (DUF1218)
AT1G11510.1	0	0	0	0	0	0	-2.68616	0	1	DNA-binding storekeeper protein-related transcriptional regulator
AT1G11520.1	5	6	7	6	8	1	-1.07723	-0.529508	0.650855	pliceosome associated protein-related
AT1G11530.1	74	116	83	140	139	94	3.2228	0.180282	0.521288	C-terminal cysteine residue is changed to a serine 1
AT1G11540.1	24	23	23	19	27	16	0.858877	-0.444353	0.378913	Sulfite exporter TauE/SafE family protein
AT1G11545.1	424	319	379	502	465	537	4.7543	0.161301	0.461183	xyloglucan endotransglucosylase/hydrolase 8
AT1G11560.1	0	1	0	1	2	3	-2.28453	1.9927	0.363916	Oligosaccharyltransferase complex/magnesium transporter family protein
AT1G11570.1	6	5	5	8	15	12	-0.404131	0.847451	0.251488	NTF2-like
AT1G11570.2	6	8	7	12	15	17	-0.117174	0.791986	0.17368	NTF2-like
AT1G11572.1	1	0	0	0	1	0	-2.25744	-0.196952	1	Plant thionin family protein
AT1G11580.1	1737	1557	2111	1752	2228	2361	6.98524	-0.0333754	1	methylesterase PCR A
AT1G11590.1	1	1	2	3	5	4	-1.19273	1.24687	0.506196	Plant invertase/pectin methylesterase inhibitor superfamily
AT1G11600.1	213	272	236	282	256	205	4.37649	-0.225489	0.179885	cytochrome P450, family 77, subfamily B, polypeptide 1
AT1G11608.1	0	0	0	0	0	0	-2.72216	0	1	F-box associated ubiquitination effector family protein
AT1G11610.1	22	8	10	21	7	14	0.191879	-0.188611	1	cytochrome P450, family 71, subfamily A, polypeptide 18
AT1G11610.2	22	8	10	21	7	14	0.191879	-0.188611	1	cytochrome P450, family 71, subfamily A, polypeptide 18
AT1G11620.1	1	0	0	0	0	0	-2.65091	-1.97833	1	F-box and associated interaction domains-containing protein
AT1G11630.1	92	115	92	108	119	111	3.12437	-0.0901416	0.8105	Tetratricopeptide repeat (TPR)-like superfamily protein
AT1G11650.1	2314	2542	2386	3067	3208	2699	7.68328	0.0409367	0.716361	RNA-binding (RRM/RBD/RNP motifs) family protein
AT1G11650.2	2491	2762	2581	3295	3443	2910	7.7893	0.0323411	0.810556	RNA-binding (RRM/RBD/RNP motifs) family protein
AT1G11655.1	3	5	12	5	5	3	-1.13039	-0.875036	0.393328	unknown protein
AT1G11660.1	679	589	650	728	711	684	5.57115	-0.120843	0.395154	heat shock protein 70 (Hsp 70) family protein
AT1G11670.1	483	355	381	512	470	483	4.88476	0.000326217	1	MATE efflux family protein
AT1G11680.1	1297	1257	1297	1397	1482	1382	6.56986	-0.120303	0.294483	CYTOCHROME P450 51G1
AT1G11684.1	0	0	0	1	1	0	-2.55007	2.55358	0.8105	unknown protein
AT1G11690.1	0	0	0	0	1	1	-2.09504	2.55775	0.811581	unknown protein
AT1G11700.1	234	285	257	196	217	116	4.73489	-0.830852	2.72e-09	Protein of unknown function, DUF584
AT1G11710.1	48	50	53	52	50	42	2.24247	-0.336336	0.213346	Pentatricopeptide repeat (PPR) superfamily protein
AT1G11720.1	898	1091	922	1058	1093	880	6.31391	-0.209613	0.0135479	starch synthase 3
AT1G11720.2	914	1108	942	1081	1113	901	6.33792	-0.205448	0.014243	starch synthase 3
AT1G11730.1	29	27	33	37	52	25	1.40815	0.0771209	1	Galactosyltransferase family protein
AT1G11735.1	0	3	0	5	1	1	-2.10695	0.884204	0.822661	MIR171B; miRNA
AT1G11740.1	22	11	13	36	21	35	0.716868	0.736191	0.0962627	ankyrin repeat family protein
AT1G11750.1	1107	1340	1101	1457	1758	1246	6.51936	0.0588905	0.731309	CLP protease proteolytic subunit 6
AT1G11750.2	1049	1257	1042	1387	1661	1169	6.44259	0.0609692	0.712979	CLP protease proteolytic subunit 6
AT1G11755.1	129	134	121	143	181	145	3.31788	0.0201392	1	Undecaprenyl pyrophosphate synthetase family protein
AT1G11760.1	71	65	66	94	99	75	2.64862	0.137129	0.727024	unknown protein
AT1G11765.1	0	0	0	0	0	0	-2.7221	0	1	Plant self-incompatibility protein S1 family
AT1G11770.1	0	0	1	0	0	0	-2.5339	-1.9815	1	FAD-binding Berberine family protein
AT1G11780.1	179	182	174	186	214	164	3.77528	-0.193253	0.207223	oxidoreductase, 2OG-Fe(II) oxygenase family protein
AT1G11785.1	2	2	1	3	2	2	-1.7305	0.205019	1	unknown protein
AT1G11790.1	375	422	403	444	506	372	5.00835	-0.132622	0.403678	arogenate dehydratase 1
AT1G11790.2	353	395	374	422	477	342	4.90456	-0.127107	0.403683	arogenate dehydratase 1
AT1G11800.1	101	111	81	96	94	80	3.01609	-0.383796	0.0635914	endonuclease/exonuclease/phosphatase family protein
AT1G11810.1	0	0	0	1	1	0	-2.58326	2.55389	0.8105	F-box associated ubiquitination effector family protein
AT1G11820.1	531	608	491	537	522	515	5.38517	-0.312568	0.000776999	O-Glycosyl hydrolases family 17 protein
AT1G11820.2	668	776	627	710	674	646	5.74742	-0.291522	0.000721895	O-Glycosyl hydrolases family 17 protein
AT1G11840.1	5187	4999	4735	6812	6534	5032	8.71872	0.0268144	0.898804	glyoxalase I homolog
AT1G11840.2	5331	5113	4846	6984	6660	5151	8.7496	0.0240273	0.925369	glyoxalase I homolog
AT1G11840.3	5109	4921	4669	6721	6459	4969	8.7004	0.0302886	0.860164	glyoxalase I homolog
AT1G11840.4	5141	4951	4691	6747	6480	4992	8.70679	0.0277016	0.889311	glyoxalase I homolog
AT1G11840.5	4830	4643	4400	6308	5996	4633	8.6009	0.0141459	1	glyoxalase I homolog
AT1G11840.6	5141	4956	4698	6756	6486	4997	8.70828	0.0281065	0.884985	glyoxalase I homolog
AT1G11850.1	290	443	316	341	367	300	4.74355	-0.320513	0.0493939	unknown protein
AT1G11850.2	297	449	321	345	373	304	4.78108	-0.325371	0.0393225	unknown protein
AT1G11850.3	282	430	311	330	355	293	4.6571	-0.327755	0.0511333	unknown protein
AT1G11850.4	289	444	318	340	367	300	4.74313	-0.324718	0.045948	unknown protein
AT1G11860.1	16611	21283	16864	20344	23964	17117	10.4942	-0.104933	0.255488	Glycine cleavage T-protein family
AT1G11860.2	16005	20531	16243	19605	23079	16459	10.4421	-0.106481	0.252104	Glycine cleavage T-protein family
AT1G11860.3	14947	19188	15223	18412	21521	15395	10.3315	-0.10597	0.287494	Glycine cleavage T-protein family
AT1G11870.1	387	456	374	433	493	396	4.87504	-0.148176	0.172763	Seryl-tRNA synthetase
AT1G11870.2	408	468	387	448	509	404	4.92343	-0.160123	0.116126	Seryl-tRNA synthetase
AT1G11870.3	381	450	362	419	473	373	4.8237	-0.183274	0.059263	Seryl-tRNA synthetase
AT1G11880.1	51	57	60	100	93	76	2.53865	0.409768	0.0402334	transferases, transferring hexosyl groups
AT1G11890.1	435	423	432	494	533	481	5.12222	-0.0423976	0.866858	Synaptobrevin family protein
AT1G11900.1	38	36	34	38	46	33	1.66802	-0.154607	0.834515	Tetratricopeptide repeat (TPR)-like superfamily protein
AT1G11905.1	147	112	112	166	159	181	3.42784	0.184785	0.404132	B-cell receptor-associated protein 31-like
AT1G11905.2	77	56	47	80	79	75	2.44074	0.112365	0.829254	B-cell receptor-associated protein 31-like
AT1G11910.1	6972	6124	5937	7241	7310	5796	8.93204	-0.176721	0.0131612	aspartic proteinase A1
AT1G11915.1	6	13	10	13	17	19	0.294889	0.488026	0.48675	unknown protein
AT1G11920.1	0	0	0	2	5	2	-2.21884	4.51684	0.0569951	Pectin lyase-like superfamily protein
AT1G11925.1	0	0	1	0	0	0	-2.704	-1.98032	1	Stigma-specific Stig1 family protein
AT1G11930.1	481	568	523	627	637	461	5.5352	-0.13856	0.27279	Predicted pyridoxal phosphate-dependent enzyme, YBL036C type
AT1G11930.2	548	635	590	721	736	531	5.71489	-0.107841	0.41409	Predicted pyridoxal phosphate-dependent enzyme, YBL036C type
AT1G11940.1	82	62	63	102	115	88	2.69271	0.288495	0.216697	Core-2/I-branching beta-1,6-N-acetylglucosaminyltransferase family protein
AT1G11950.1	71	72	75	104	102	74	2.80547	0.0904083	0.867157	Transcription factor jumonji (jmjC) domain-containing protein
AT1G11960.1	161	152	152	179	177	180	3.53609	-0.0606452	0.898139	ERD (early-responsive to dehydration stress) family protein
AT1G11990.1	3	2	4	4	4	2	-1.49416	-0.117419	1	O-fucosyltransferase family protein
AT1G12000.1	2386	2069	2312	2653	2502	2156	7.26227	-0.161336	0.174545	Phosphofructokinase family protein
AT1G12010.1	142	99	121	154	154	142	3.16983	0.043524	1	2-oxoglutarate (2OG) and Fe(II)-dependent oxygenase superfamily protein
AT1G12020.1	93	101	87	118	122	87	3.13011	-0.0504085	0.962778	unknown protein
AT1G12030.1	8	12	17	25	16	15	0.511938	0.322989	0.790992	Protein of unknown function (DUF506)
AT1G12040.1	134	86	139	189	141	153	2.78319	0.155386	0.835484	leucine-rich repeat/extensin 1
AT1G12050.1	589	586	517	750	704	561	5.59397	-0.0175748	1	fumarylacetoacetase, putative
AT1G12060.1	35	38	47	47	63	41	1.76746	0.0594365	1	BCL-2-associated athanogene 5
AT1G12064.1	2	0	3	2	2	3	-2.04859	0.20361	1	unknown protein
AT1G12070.1	0	6	8	4	5	5	-1.27814	-0.260989	1	Immunoglobulin E-set superfamily protein
AT1G12080.1	426	235	353	425	450	426	4.86961	0.0861715	0.877501	Vacuolar calcium-binding protein-related
AT1G12080.2	653	355	578	684	718	704	5.53102	0.135373	0.697208	Vacuolar calcium-binding protein-related
AT1G12090.1	4354	5283	3867	5472	6854	5798	8.91321	0.16437	0.300819	extensin-like protein
AT1G12100.1	2	4	2	4	9	15	-0.861512	1.52542	0.114445	Bifunctional inhibitor/lipid-transfer protein/seed storage 2S albumin superfamily protein
AT1G12110.1	3239	1909	2666	2796	2885	3062	7.52248	-0.105039	0.839699	nitrate transporter 1.1
AT1G12120.1	534	542	534	782	789	582	5.56347	0.146801	0.129999	Plant protein of unknown function (DUF863)
AT1G12130.1	10	2	7	8	6	4	-0.895659	-0.347122	0.851438	Flavin-binding monooxygenase family protein
AT1G12140.1	606	595	563	691	590	569	5.45529	-0.197154	0.0689294	flavin-monooxygenase glucosinolate S-oxygenase 5
AT1G12140.2	580	562	540	650	556	538	5.37969	-0.213674	0.0610278	flavin-monooxygenase glucosinolate S-oxygenase 5
AT1G12150.1	25	25	38	35	41	29	1.01526	-0.0206938	1	Plant protein of unknown function (DUF827)
AT1G12160.1	88	42	111	103	111	121	2.55191	0.200462	0.664378	Flavin-binding monooxygenase family protein
AT1G12180.1	0	0	0	0	0	0	-2.7222	0	1	unknown protein
AT1G12190.1	0	0	0	0	0	0	-2.72223	0	1	F-box and associated interaction domains-containing protein
AT1G12200.1	454	395	401	683	664	545	5.0266	0.325792	0.0386093	Flavin-binding monooxygenase family protein
AT1G12210.1	51	44	46	61	43	41	1.78673	-0.22771	0.580671	RPS5-like 1
AT1G12211.1	0	0	0	0	0	0	-2.72215	0	1	unknown protein
AT1G12220.1	93	114	122	117	105	115	3.05925	-0.230086	0.344316	Disease resistance protein (CC-NBS-LRR class) family
AT1G12220.2	96	117	122	118	102	115	3.07377	-0.264402	0.231387	Disease resistance protein (CC-NBS-LRR class) family
AT1G12230.1	1113	1223	1052	1415	1428	1194	6.43803	-0.0145317	1	Aldolase superfamily protein
AT1G12230.2	1079	1194	1014	1371	1387	1157	6.38968	-0.01498	1	Aldolase superfamily protein
AT1G12240.1	1927	1950	1682	2272	2260	2130	7.18148	-0.00145585	1	Glycosyl hydrolases family 32 protein
AT1G12244.1	111	154	110	143	160	97	3.2847	-0.178644	0.498518	Polynucleotidyl transferase, ribonuclease H-like superfamily protein
AT1G12250.1	384	550	412	563	628	498	5.44473	0.0617947	0.796556	Pentapeptide repeat-containing protein
AT1G12250.2	366	525	398	535	604	476	5.37805	0.059211	0.8105	Pentapeptide repeat-containing protein
AT1G12260.1	57	45	54	91	42	48	2.09436	-0.0547191	1	NAC 007
AT1G12270.1	773	791	714	902	857	716	5.89249	-0.149141	0.174586	stress-inducible protein, putative
AT1G12280.1	160	145	142	170	140	142	3.45461	-0.250439	0.147384	LRR and NB-ARC domains-containing disease resistance protein
AT1G12290.1	52	45	50	77	52	40	2.19918	-0.0700373	0.978906	Disease resistance protein (CC-NBS-LRR class) family
AT1G12290.2	54	47	54	83	58	43	2.2752	-0.0244207	1	Disease resistance protein (CC-NBS-LRR class) family
AT1G12294.1	1	1	1	0	0	0	-2.28447	-3.2955	0.549517	MIR472a; miRNA
AT1G12300.1	72	89	82	114	107	88	2.80573	0.0780052	0.88139	Tetratricopeptide repeat (TPR)-like superfamily protein
AT1G12310.1	839	744	775	1118	1153	942	6.1454	0.174544	0.084538	Calcium-binding EF-hand family protein
AT1G12320.1	65	93	85	102	112	100	3.27075	0.102989	0.8105	Protein of unknown function (DUF1442)
AT1G12330.1	192	270	207	253	274	206	4.45013	-0.136114	0.461183	unknown protein
AT1G12340.1	64	58	50	78	94	85	2.42588	0.311091	0.149546	Cornichon family protein
AT1G12350.1	225	198	200	251	241	232	4.09865	-0.0499408	0.927902	4-phospho-panto-thenoylcysteine synthetase
AT1G12360.1	755	675	667	1016	971	884	5.83746	0.185702	0.0785051	Sec1/munc18-like (SM) proteins superfamily
AT1G12370.1	166	153	173	175	204	146	3.72182	-0.178497	0.308436	photolyase 1
AT1G12370.2	181	163	182	187	228	159	3.84652	-0.147035	0.42671	photolyase 1
AT1G12380.1	200	228	201	181	193	160	3.92573	-0.503902	1.51e-05	unknown protein
AT1G12390.1	151	157	130	190	228	177	3.6967	0.173343	0.296898	Cornichon family protein
AT1G12400.1	68	69	64	82	96	79	2.5059	0.0861075	0.883351	Nucleotide excision repair, TFIIH, subunit TTDA
AT1G12410.1	1570	1890	1533	1960	2307	1805	7.09634	0.0148728	1	CLP protease proteolytic subunit 2
AT1G12420.1	143	124	153	172	169	149	3.47181	-0.0474611	0.957138	ACT domain repeat 8
AT1G12430.1	358	414	397	452	401	454	4.91507	-0.0996257	0.587365	armadillo repeat kinesin 3
AT1G12430.2	354	407	391	438	392	443	4.87666	-0.116637	0.489944	armadillo repeat kinesin 3
AT1G12440.1	491	611	473	991	1026	950	5.63792	0.651892	1.39e-15	A20/AN1-like zinc finger family protein
AT1G12440.2	458	558	443	913	933	871	5.54458	0.634966	5.98e-14	A20/AN1-like zinc finger family protein
AT1G12450.1	75	68	54	118	143	181	2.6793	0.912566	5.11e-06	SNARE associated Golgi protein family
AT1G12460.1	206	255	215	301	330	293	4.29428	0.185682	0.249207	Leucine-rich repeat protein kinase family protein
AT1G12470.1	676	644	662	767	704	645	5.64457	-0.173845	0.105108	zinc ion binding
AT1G12480.1	49	55	48	39	42	34	2.07547	-0.668752	0.0201897	C4-dicarboxylate transporter/malic acid transport protein
AT1G12490.1	0	0	0	1	0	0	-2.4111	1.78224	1	F-box associated ubiquitination effector family protein
AT1G12500.1	574	648	517	777	851	899	5.64469	0.282858	0.00660611	Nucleotide-sugar transporter family protein
AT1G12520.1	174	188	169	275	301	252	4.23036	0.37256	0.000246159	copper chaperone for SOD1
AT1G12520.2	181	194	176	285	308	252	4.2658	0.348349	0.000577417	copper chaperone for SOD1
AT1G12520.3	166	175	155	265	284	236	4.13134	0.393932	0.000218236	copper chaperone for SOD1
AT1G12530.1	146	137	156	231	234	207	3.84762	0.344955	0.0149545	unknown protein
AT1G12540.1	0	0	0	0	0	0	-2.72217	0	1	basic helix-loop-helix (bHLH) DNA-binding superfamily protein
AT1G12550.1	59	64	60	79	92	60	2.52073	0.0649353	0.995792	D-isomer specific 2-hydroxyacid dehydrogenase family protein
AT1G12560.1	182	116	190	257	226	249	3.20879	0.314765	0.403683	expansin A7
AT1G12570.1	84	105	80	106	86	88	3.17405	-0.205333	0.494278	Glucose-methanol-choline (GMC) oxidoreductase family protein
AT1G12580.1	449	456	425	651	689	744	5.19218	0.388018	2.12e-05	phosphoenolpyruvate carboxylase-related kinase 1
AT1G12600.1	5	4	8	7	9	8	-0.573862	0.223711	1	UDP-N-acetylglucosamine (UAA) transporter family
AT1G12610.1	0	0	0	1	0	1	-2.65095	2.55915	0.8105	Integrase-type DNA-binding superfamily protein
AT1G12620.1	77	86	87	109	112	89	2.88757	0.0415813	1	Pentatricopeptide repeat (PPR) superfamily protein
AT1G12630.1	3	4	1	1	4	1	-1.31915	-0.648756	0.751272	Integrase-type DNA-binding superfamily protein
AT1G12640.1	504	377	452	588	584	501	5.10928	0.0553174	0.845011	MBOAT (membrane bound O-acyl transferase) family protein
AT1G12650.1	284	251	313	343	359	262	4.5114	-0.092105	0.695508	unknown protein
AT1G12650.2	297	263	326	356	377	273	4.56453	-0.0940625	0.685036	unknown protein
AT1G12650.3	285	250	314	345	362	264	4.51479	-0.0835169	0.739396	unknown protein
AT1G12650.4	253	220	286	313	321	236	4.33318	-0.0800817	0.766035	unknown protein
AT1G12660.1	0	0	0	0	0	0	-2.70394	0	1	unknown protein
AT1G12663.1	0	0	0	1	0	0	-2.70396	1.78192	1	unknown protein
AT1G12665.1	0	0	0	0	0	0	-2.65079	0	1	unknown protein
AT1G12670.1	0	0	0	1	0	0	-2.48655	1.78222	1	pseudogene
AT1G12672.1	1	1	0	1	10	0	-1.97024	1.9739	0.275197	unknown protein
AT1G12672.2	1	1	0	2	11	0	-1.78699	2.21159	0.188164	unknown protein
AT1G12680.1	236	217	216	326	312	290	4.42458	0.20451	0.0957565	phosphoenolpyruvate carboxylase-related kinase 2
AT1G12700.1	55	59	47	69	55	44	2.29206	-0.206683	0.576961	ATP binding;nucleic acid binding;helicases
AT1G12710.1	51	43	40	89	76	103	2.34488	0.738588	0.000510836	phloem protein 2-A12
AT1G12730.1	41	58	61	94	93	89	2.60755	0.519378	0.0306136	GPI transamidase subunit PIG-U
AT1G12730.2	39	56	58	93	89	87	2.52934	0.546893	0.0144327	GPI transamidase subunit PIG-U
AT1G12740.1	188	86	125	142	163	214	3.34048	0.123403	0.930903	cytochrome P450, family 87, subfamily A, polypeptide 2
AT1G12740.2	177	83	122	138	158	205	3.28211	0.134335	0.905351	cytochrome P450, family 87, subfamily A, polypeptide 2
AT1G12750.1	167	209	201	175	229	188	4.2592	-0.230988	0.187273	RHOMBOID-like protein 6
AT1G12750.2	179	217	213	188	239	203	4.35849	-0.218735	0.1865	RHOMBOID-like protein 6
AT1G12750.3	179	222	221	195	249	212	4.39599	-0.190883	0.285883	RHOMBOID-like protein 6
AT1G12760.1	564	525	476	693	657	606	5.53235	0.0554865	0.756812	Zinc finger, C3HC4 type (RING finger) family protein
AT1G12760.2	532	494	455	657	626	575	5.45783	0.0606218	0.725266	Zinc finger, C3HC4 type (RING finger) family protein
AT1G12770.1	658	922	660	812	857	638	5.74072	-0.224457	0.032718	P-loop containing nucleoside triphosphate hydrolases superfamily protein
AT1G12775.1	49	59	55	57	71	57	2.22704	-0.0855415	0.925002	Pentatricopeptide repeat (PPR) superfamily protein
AT1G12780.1	300	379	346	864	884	978	5.13677	1.15512	4.52e-28	UDP-D-glucose/UDP-D-galactose 4-epimerase 1
AT1G12790.1	19	39	35	35	47	51	1.53768	0.252014	0.563463	unknown protein
AT1G12800.1	3325	4382	3537	3864	4445	2981	8.13947	-0.267779	0.000340458	Nucleic acid-binding, OB-fold-like protein
AT1G12805.1	9	13	43	0	36	80	0.781242	0.606835	0.750459	nucleotide binding
AT1G12810.1	172	167	145	234	261	235	4.06616	0.326156	0.0111594	proline-rich family protein
AT1G12810.2	153	142	126	195	220	199	3.84164	0.277607	0.0655114	proline-rich family protein
AT1G12820.1	598	665	584	675	756	541	5.72079	-0.1766	0.0391073	auxin signaling F-box 3
AT1G12830.1	197	234	191	266	287	195	4.18279	-0.00613529	1	unknown protein
AT1G12840.1	2254	2092	2010	2650	2713	2369	7.36398	0.0146981	1	vacuolar ATP synthase subunit C (VATC) / V-ATPase C subunit / vacuolar proton pump C subunit (DET3)
AT1G12845.1	90	97	77	75	96	77	3.20778	-0.356443	0.196055	unknown protein
AT1G12850.1	525	449	433	553	557	501	5.26819	-0.0723013	0.640082	Phosphoglycerate mutase family protein
AT1G12855.1	3	3	2	4	1	6	-1.7496	0.190373	1	F-box family protein
AT1G12860.1	380	519	404	564	699	479	5.23521	0.148185	0.260887	basic helix-loop-helix (bHLH) DNA-binding superfamily protein
AT1G12870.1	0	1	0	0	0	0	-2.66828	-1.9757	1	F-box and associated interaction domains-containing protein
AT1G12880.1	93	116	94	130	165	102	3.07143	0.115522	0.816637	nudix hydrolase homolog 12
AT1G12890.1	2	0	1	1	1	3	-1.84589	0.430246	0.9796	Integrase-type DNA-binding superfamily protein
AT1G12900.1	18795	23300	17021	22761	28128	20214	10.6083	-0.00190351	1	glyceraldehyde 3-phosphate dehydrogenase A subunit 2
AT1G12900.2	17618	21955	16043	21415	26426	18995	10.5197	-0.00311837	1	glyceraldehyde 3-phosphate dehydrogenase A subunit 2
AT1G12900.3	17931	22258	16248	21615	27007	19213	10.5432	-0.00326972	1	glyceraldehyde 3-phosphate dehydrogenase A subunit 2
AT1G12900.4	16788	20836	15224	20427	25079	18094	10.432	-0.000941391	1	glyceraldehyde 3-phosphate dehydrogenase A subunit 2
AT1G12910.1	276	272	243	385	437	381	4.42891	0.33767	0.000492605	Transducin/WD40 repeat-like superfamily protein
AT1G12920.1	1298	1350	1292	1531	1631	1374	6.57197	-0.0655594	0.668716	eukaryotic release factor 1-2
AT1G12930.1	368	354	324	395	407	333	4.7019	-0.151015	0.191345	ARM repeat superfamily protein
AT1G12940.1	0	0	3	0	2	2	-2.07189	0.130677	1	nitrate transporter2.5
AT1G12950.1	81	47	63	102	76	97	2.10329	0.262913	0.580475	root hair specific 2
AT1G12960.1	0	0	0	0	0	0	-2.72206	0	1	Ribosomal protein L18e/L15 superfamily protein
AT1G12970.1	81	80	73	106	132	117	2.83369	0.333545	0.0736415	plant intracellular ras group-related LRR 3
AT1G12980.1	1	1	1	1	1	3	-2.01471	0.434279	0.981884	Integrase-type DNA-binding superfamily protein
AT1G12990.1	224	242	201	378	410	411	4.38455	0.583543	1.2e-08	beta-1,4-N-acetylglucosaminyltransferase family protein
AT1G13000.1	190	192	181	227	221	212	3.95595	-0.0372106	0.981884	Protein of unknown function (DUF707)
AT1G13000.2	204	193	183	234	227	214	3.98743	-0.0483693	0.915449	Protein of unknown function (DUF707)
AT1G13020.1	623	663	560	582	650	528	5.53838	-0.336438	9.95e-05	eukaryotic initiation factor 4B2
AT1G13030.1	196	170	178	201	192	155	3.87644	-0.259907	0.0894479	sphere organelles protein-related
AT1G13040.1	39	46	35	65	44	53	1.90858	0.169705	0.736751	Pentatricopeptide repeat (PPR-like) superfamily protein
AT1G13050.1	48	55	41	65	69	50	2.02301	0.0848088	0.946797	unknown protein
AT1G13050.2	49	52	39	63	66	51	2.01126	0.0940806	0.893763	unknown protein
AT1G13060.1	1429	1263	1340	1576	1716	1475	6.73749	-0.0285761	0.94442	20S proteasome beta subunit E1
AT1G13060.2	1324	1168	1241	1473	1595	1362	6.63802	-0.0235129	0.980915	20S proteasome beta subunit E1
AT1G13070.1	1	0	0	0	1	1	-2.53409	0.578847	1	CYP71B27 (cytochrome P450	family 71	subfamily B	polypeptide 27")"
AT1G13080.1	529	477	432	621	612	436	5.23326	-0.0593108	0.815697	cytochrome P450, family 71, subfamily B, polypeptide 2
AT1G13080.2	495	445	406	583	579	403	5.13111	-0.0575179	0.833703	cytochrome P450, family 71, subfamily B, polypeptide 2
AT1G13090.1	527	606	521	602	699	443	5.65238	-0.198533	0.0740725	cytochrome P450, family 71, subfamily B, polypeptide 28
AT1G13100.1	79	84	76	167	122	90	3.02406	0.392361	0.0765323	cytochrome P450, family 71, subfamily B, polypeptide 29
AT1G13110.1	738	695	591	901	940	902	6.04897	0.176516	0.141777	cytochrome P450, family 71 subfamily B, polypeptide 7
AT1G13120.1	295	299	304	336	338	255	4.67798	-0.223271	0.0951735	embryo defective 1745
AT1G13130.1	53	61	46	90	56	59	1.97009	0.0964541	0.999185	Cellulase (glycosyl hydrolase family 5) protein
AT1G13140.1	15	4	7	14	11	12	0.0457926	0.237354	0.931714	cytochrome P450, family 86, subfamily C, polypeptide 3
AT1G13140.2	15	4	5	14	11	12	-0.0315144	0.352546	0.815968	cytochrome P450, family 86, subfamily C, polypeptide 3
AT1G13145.1	28	23	34	27	39	33	1.36505	-0.0499244	1	pseudogene
AT1G13150.1	11	16	9	20	27	6	0.471991	0.279107	0.806532	cytochrome P450, family 86, subfamily C, polypeptide 4
AT1G13160.1	714	688	739	640	636	549	5.55136	-0.501037	4.76e-07	ARM repeat superfamily protein
AT1G13170.1	426	399	455	521	494	439	4.99375	-0.0864108	0.60936	OSBP(oxysterol binding protein)-related protein 1D
AT1G13170.2	418	389	442	508	488	433	4.96262	-0.0758965	0.674695	OSBP(oxysterol binding protein)-related protein 1D
AT1G13180.1	136	128	131	172	206	140	3.39214	0.1193	0.626479	Actin-like ATPase superfamily protein
AT1G13190.1	341	426	405	546	549	468	5.0019	0.147224	0.282326	RNA-binding (RRM/RBD/RNP motifs) family protein
AT1G13195.1	101	97	90	144	130	118	3.0294	0.176954	0.441604	RING/U-box superfamily protein
AT1G13195.2	92	88	82	132	120	115	2.91929	0.219387	0.361124	RING/U-box superfamily protein
AT1G13200.1	1	0	0	0	0	0	-2.48683	-1.97817	1	F-box and associated interaction domains-containing protein
AT1G13210.1	359	257	321	438	367	431	4.59274	0.136639	0.612499	autoinhibited Ca2+/ATPase II
AT1G13220.1	108	124	123	144	115	115	3.15289	-0.191074	0.444653	nuclear matrix constituent protein-related
AT1G13220.2	325	399	382	464	446	356	5.00677	-0.0755086	0.739197	nuclear matrix constituent protein-related
AT1G13230.1	4	7	2	6	3	5	-1.03171	-0.151541	1	Leucine-rich repeat (LRR) family protein
AT1G13245.1	221	327	212	621	487	591	5.07335	0.913309	1.41e-08	ROTUNDIFOLIA like 17
AT1G13250.1	178	217	202	226	252	220	4.26261	-0.0415594	0.958223	galacturonosyltransferase-like 3
AT1G13260.1	137	186	127	422	285	788	4.01573	1.52609	5.7e-07	related to ABI3/VP1 1
AT1G13270.1	305	503	375	365	491	319	4.66102	-0.280494	0.101693	methionine aminopeptidase 1B
AT1G13270.2	279	448	335	328	435	297	4.51238	-0.271766	0.110641	methionine aminopeptidase 1B
AT1G13280.1	380	298	350	422	453	399	4.97605	0.0388285	0.969461	allene oxide cyclase 4
AT1G13290.1	0	1	0	0	0	0	-2.25776	-1.97653	1	C2H2-like zinc finger protein
AT1G13300.1	218	146	185	3364	4039	2977	5.39951	3.9613	2.39e-181	myb-like transcription factor family protein
AT1G13310.1	12	2	6	9	6	5	-0.199391	-0.271666	0.95624	Endosomal targeting BRO1-like domain-containing protein
AT1G13320.1	877	861	817	981	977	841	5.98129	-0.136782	0.102561	protein phosphatase 2A subunit A3
AT1G13320.2	831	811	785	932	926	797	5.89664	-0.13912	0.105352	protein phosphatase 2A subunit A3
AT1G13320.3	853	836	803	955	957	823	5.95319	-0.134284	0.111024	protein phosphatase 2A subunit A3
AT1G13330.1	30	30	33	40	50	37	1.62563	0.18017	0.704839	Arabidopsis Hop2 homolog
AT1G13340.1	88	61	67	112	86	71	2.5353	0.0433664	1	Regulator of Vps4 activity in the MVB pathway protein
AT1G13350.1	398	415	400	475	564	398	5.23253	-0.0274217	0.955074	Protein kinase superfamily protein
AT1G13350.2	400	416	408	478	568	400	5.23822	-0.0317997	0.923936	Protein kinase superfamily protein
AT1G13360.1	751	770	659	654	682	441	5.92467	-0.569661	1.4e-11	unknown protein
AT1G13360.2	576	559	481	478	484	314	5.42254	-0.614962	9.74e-12	unknown protein
AT1G13360.3	576	559	481	477	484	314	5.4218	-0.616072	8.39e-12	unknown protein
AT1G13370.1	7	7	3	4	3	3	-0.997504	-1.00367	0.359037	Histone superfamily protein
AT1G13380.1	270	280	268	393	384	349	4.50036	0.194078	0.168713	Protein of unknown function (DUF1218)
AT1G13390.1	113	103	91	133	132	134	3.2745	0.112917	0.712289	unknown protein
AT1G13390.2	146	129	120	180	175	167	3.75037	0.135923	0.579523	unknown protein
AT1G13400.1	1	3	5	1	0	2	-1.33939	-1.72109	0.300561	C2H2 and C2HC zinc fingers superfamily protein
AT1G13410.1	36	26	26	18	26	26	1.16169	-0.594924	0.0816634	Tetratricopeptide repeat (TPR)-like superfamily protein
AT1G13420.1	99	90	122	236	85	143	2.88464	0.314571	0.677461	sulfotransferase 4B
AT1G13430.1	33	24	31	37	40	41	1.29503	0.15534	0.851042	sulfotransferase 4C
AT1G13440.1	19905	22584	20001	22345	27734	21647	10.7283	-0.070292	0.570356	glyceraldehyde-3-phosphate dehydrogenase C2
AT1G13440.2	17063	19475	17240	19184	23900	18569	10.527	-0.0721737	0.560556	glyceraldehyde-3-phosphate dehydrogenase C2
AT1G13450.1	246	270	237	339	405	346	4.40546	0.266913	0.030377	Homeodomain-like superfamily protein
AT1G13450.2	223	239	218	310	357	323	4.26797	0.275782	0.0226963	Homeodomain-like superfamily protein
AT1G13450.3	229	266	226	318	394	320	4.36977	0.249883	0.0497288	Homeodomain-like superfamily protein
AT1G13460.1	266	245	245	273	254	229	4.39996	-0.268203	0.0320894	Protein phosphatase 2A regulatory B subunit family protein
AT1G13460.2	266	243	250	280	256	231	4.40231	-0.253358	0.0393225	Protein phosphatase 2A regulatory B subunit family protein
AT1G13470.1	0	0	2	1	0	3	-1.65038	0.650222	0.955991	Protein of unknown function (DUF1262)
AT1G13480.1	10	10	11	13	14	17	0.674977	0.238378	0.892009	Protein of unknown function (DUF1262)
AT1G13490.1	2	2	1	1	1	2	-1.8758	-0.542423	1	Protein of unknown function (DUF1262)
AT1G13500.1	7	10	7	13	7	7	-0.29747	-0.0959983	1	Protein of unknown function (DUF1262)
AT1G13510.1	61	19	38	45	26	28	1.48175	-0.529803	0.461039	Protein of unknown function (DUF1262)
AT1G13520.1	141	50	82	193	77	99	3.06761	0.159518	0.941274	Protein of unknown function (DUF1262)
AT1G13530.1	52	13	18	44	38	22	1.30033	0.0369102	1	Protein of unknown function (DUF1262)
AT1G13540.1	9	9	11	12	11	14	0.13429	0.0836283	1	Protein of unknown function (DUF1262)
AT1G13550.1	7	3	4	8	9	7	-0.392527	0.496789	0.781758	Protein of unknown function (DUF1262)
AT1G13560.1	778	898	784	1009	1058	892	6.15478	-0.000764446	1	aminoalcoholphosphotransferase 1
AT1G13560.2	735	846	740	950	986	841	6.07038	-0.00817746	1	aminoalcoholphosphotransferase 1
AT1G13570.1	173	171	140	234	243	220	3.73883	0.260246	0.0857794	F-box/RNI-like superfamily protein
AT1G13580.1	162	128	117	160	172	147	3.41436	-0.033221	1	LAG1 longevity assurance homolog 3
AT1G13580.2	169	141	122	168	181	156	3.50799	-0.0423973	0.97407	LAG1 longevity assurance homolog 3
AT1G13580.3	168	141	122	169	181	159	3.51287	-0.0274167	1	LAG1 longevity assurance homolog 3
AT1G13590.1	74	38	58	49	81	81	1.94187	0.0444794	1	phytosulfokine 1 precursor
AT1G13600.1	35	26	42	41	49	30	1.3925	-0.0553887	1	basic leucine-zipper 58
AT1G13605.1	2	0	0	1	1	1	-2.55027	0.27468	1	unknown protein
AT1G13607.1	0	1	0	0	0	0	-2.65086	-1.97588	1	Defensin-like (DEFL) family protein
AT1G13608.1	0	0	0	0	0	0	-2.45612	0	1	Defensin-like (DEFL) family protein
AT1G13609.1	3	20	4	5	3	4	0.889033	-1.37833	0.15945	Defensin-like (DEFL) family protein
AT1G13609.2	2	11	2	1	1	3	0.301304	-1.75985	0.151761	Defensin-like (DEFL) family protein
AT1G13610.1	9	7	17	12	10	10	-0.143435	-0.313687	0.816718	alpha/beta-Hydrolases superfamily protein
AT1G13610.2	9	6	17	11	8	10	-0.19608	-0.409122	0.694738	alpha/beta-Hydrolases superfamily protein
AT1G13620.1	15	12	14	16	14	5	-0.398398	-0.498212	0.434262	unknown protein
AT1G13630.1	25	25	26	20	22	17	1.20525	-0.63052	0.0825434	Tetratricopeptide repeat (TPR)-like superfamily protein
AT1G13630.2	27	25	30	22	22	19	1.35564	-0.64544	0.0638117	Tetratricopeptide repeat (TPR)-like superfamily protein
AT1G13635.1	37	27	29	33	26	34	1.19779	-0.262585	0.647813	DNA glycosylase superfamily protein
AT1G13635.2	37	30	30	38	26	36	1.25372	-0.216711	0.787458	DNA glycosylase superfamily protein
AT1G13640.1	407	414	380	540	553	621	4.97376	0.254927	0.0297689	Phosphatidylinositol 3- and 4-kinase family protein
AT1G13650.1	470	518	341	546	674	274	5.52301	-0.119433	0.723317	unknown protein
AT1G13650.2	476	534	354	552	695	279	5.56385	-0.126856	0.694465	unknown protein
AT1G13670.1	99	74	85	157	145	149	3.12475	0.538947	0.00205792	unknown protein
AT1G13680.1	0	2	0	1	2	2	-2.0605	0.943524	0.778564	PLC-like phosphodiesterases superfamily protein
AT1G13690.1	232	254	229	276	330	250	4.3301	-0.00981499	1	ATPase E1
AT1G13700.1	18	30	14	113	64	132	1.42228	2.08338	4.5e-09	6-phosphogluconolactonase 1
AT1G13710.1	85	99	104	110	63	74	2.79979	-0.48636	0.0477933	cytochrome P450, family 78, subfamily A, polypeptide 5
AT1G13730.1	624	580	594	625	625	488	5.62402	-0.321073	0.000186465	Nuclear transport factor 2 (NTF2) family protein with RNA binding (RRM-RBD-RNP motifs) domain
AT1G13740.1	96	104	95	129	87	100	3.2128	-0.16501	0.564695	ABI five binding protein 2
AT1G13750.1	130	93	115	152	119	133	3.01278	-0.0087009	1	Purple acid phosphatases superfamily protein
AT1G13755.1	0	0	0	0	0	0	-2.72213	0	1	Defensin-like (DEFL) family protein
AT1G13770.1	133	163	156	159	168	166	3.66744	-0.140269	0.541357	Protein of unknown function, DUF647
AT1G13770.2	129	159	151	158	164	163	3.63901	-0.12147	0.630829	Protein of unknown function, DUF647
AT1G13780.1	73	69	69	90	105	93	2.65609	0.180647	0.509355	F-box/RNI-like/FBD-like domains-containing protein
AT1G13790.1	62	70	74	87	110	68	2.68983	0.0920277	0.873518	XH/XS domain-containing protein
AT1G13800.1	20	20	22	20	17	15	0.740451	-0.519961	0.340782	Tetratricopeptide repeat (TPR)-like superfamily protein
AT1G13810.1	94	98	105	117	113	89	3.10697	-0.166091	0.46172	Restriction endonuclease, type II-like superfamily protein
AT1G13820.1	611	786	603	806	1003	689	5.78953	0.0500193	0.834603	alpha/beta-Hydrolases superfamily protein
AT1G13830.1	66	34	46	39	43	66	1.70539	-0.233147	0.743429	Carbohydrate-binding X8 domain superfamily protein
AT1G13860.1	213	260	256	270	291	239	4.3479	-0.134924	0.412914	QUASIMODO2 LIKE 1
AT1G13860.2	202	245	232	254	273	228	4.266	-0.115204	0.522511	QUASIMODO2 LIKE 1
AT1G13860.3	215	262	262	275	295	243	4.38446	-0.131525	0.448393	QUASIMODO2 LIKE 1
AT1G13860.4	212	261	255	270	292	240	4.34995	-0.129217	0.441084	QUASIMODO2 LIKE 1
AT1G13870.1	171	170	161	206	216	169	3.82896	-0.034308	0.989862	calmodulin binding;purine nucleotide binding
AT1G13880.1	225	232	223	378	317	334	4.36942	0.333284	0.00471799	ELM2 domain-containing protein
AT1G13890.1	0	0	0	0	0	0	-2.68598	0	1	soluble N-ethylmaleimide-sensitive factor adaptor protein 30
AT1G13900.1	434	362	391	498	467	421	4.84139	-0.0455854	0.864267	Purple acid phosphatases superfamily protein
AT1G13910.1	69	84	83	85	127	82	3.00792	0.0449073	1	Leucine-rich repeat (LRR) family protein
AT1G13920.1	44	34	56	47	55	46	2.20043	-0.12851	0.813948	Remorin family protein
AT1G13930.1	3211	3511	2862	3803	4250	2428	9.1179	-0.153124	0.314293	unknown protein
AT1G13930.2	3193	3485	2849	3776	4228	2412	9.10948	-0.153615	0.312983	unknown protein
AT1G13930.3	3194	3486	2849	3776	4228	2414	9.10982	-0.1536	0.313004	unknown protein
AT1G13940.1	280	317	254	315	298	212	4.40058	-0.31481	0.00594908	Plant protein of unknown function (DUF863)
AT1G13950.1	118	89	134	144	185	174	3.31068	0.291061	0.136326	eukaryotic elongation factor 5A-1
AT1G13960.1	247	215	242	362	282	265	4.30158	0.0987264	0.730675	WRKY DNA-binding protein 4
AT1G13960.2	236	185	227	331	252	249	4.19285	0.0906119	0.78487	WRKY DNA-binding protein 4
AT1G13970.1	112	69	108	99	106	108	2.8102	-0.154924	0.734003	Protein of unknown function (DUF1336)
AT1G13980.1	687	673	620	864	760	673	5.55199	-0.0535778	0.828426	sec7 domain-containing protein
AT1G13980.2	683	660	617	862	758	672	5.54207	-0.0423232	0.905351	sec7 domain-containing protein
AT1G13990.1	145	115	102	246	162	163	3.90094	0.391298	0.130207	unknown protein
AT1G13990.2	137	103	93	227	153	148	3.77517	0.397218	0.122342	unknown protein
AT1G13990.3	113	84	79	199	134	123	3.54943	0.454188	0.0838038	unknown protein
AT1G14000.1	908	866	860	995	991	875	6.10243	-0.149078	0.125868	VH1-interacting kinase
AT1G14010.1	329	258	281	407	396	380	4.58757	0.179198	0.155742	emp24/gp25L/p24 family/GOLD family protein
AT1G14020.1	275	304	260	315	335	296	4.43414	-0.0936277	0.574531	O-fucosyltransferase family protein
AT1G14030.1	378	525	431	540	682	398	5.28391	0.00309897	1	Rubisco methyltransferase family protein
AT1G14040.1	150	115	137	220	165	164	3.42847	0.179884	0.597163	EXS (ERD1/XPR1/SYG1) family protein
AT1G14060.1	199	179	230	276	221	242	4.11277	0.0146423	1	GCK domain-containing protein
AT1G14070.1	99	76	109	119	86	84	2.71921	-0.247456	0.443594	fucosyltransferase 7
AT1G14071.1	0	0	0	0	0	0	-2.72212	0	1	MIR830a; miRNA
AT1G14080.1	113	60	108	110	117	99	2.61734	-0.0651055	1	fucosyltransferase 6
AT1G14090.1	79	55	77	110	90	74	2.57179	0.103926	0.870209	pseudogene
AT1G14100.1	1	2	2	0	3	0	-2.04858	-0.920828	0.980249	fucosyltransferase 8
AT1G14110.1	0	0	0	0	0	0	-2.72216	0	1	fucosyltransferase 9
AT1G14120.1	379	285	324	590	370	373	4.75236	0.161047	0.65108	2-oxoglutarate (2OG) and Fe(II)-dependent oxygenase superfamily protein
AT1G14130.1	119	119	89	224	162	158	3.43229	0.469782	0.0111863	2-oxoglutarate (2OG) and Fe(II)-dependent oxygenase superfamily protein
AT1G14140.1	130	136	155	201	197	195	3.63038	0.227214	0.210338	Mitochondrial substrate carrier family protein
AT1G14150.1	832	1056	856	998	1196	905	6.43955	-0.0928623	0.487314	PsbQ-like 2
AT1G14150.2	629	806	673	773	912	683	6.01178	-0.101503	0.46279	PsbQ-like 2
AT1G14160.1	78	35	69	77	107	90	2.2977	0.312308	0.452403	Uncharacterised protein family (UPF0497)
AT1G14170.1	212	134	168	272	228	180	3.70558	0.125672	0.761323	RNA-binding KH domain-containing protein
AT1G14170.2	202	131	165	264	225	173	3.66483	0.132072	0.738772	RNA-binding KH domain-containing protein
AT1G14170.3	222	140	174	283	236	183	3.75696	0.110488	0.810373	RNA-binding KH domain-containing protein
AT1G14180.1	96	103	97	120	153	104	3.13128	0.0785305	0.872038	RING/U-box superfamily protein
AT1G14180.2	95	101	94	114	143	103	3.08201	0.0420993	1	RING/U-box superfamily protein
AT1G14182.1	0	1	0	0	0	0	-2.5665	-1.9764	1	SCRL28 (SCR-like 28)
AT1G14185.1	50	38	27	70	46	47	1.82079	0.237764	0.61647	Glucose-methanol-choline (GMC) oxidoreductase family protein
AT1G14190.1	66	48	59	93	83	64	2.46312	0.200189	0.56767	Glucose-methanol-choline (GMC) oxidoreductase family protein
AT1G14200.1	58	58	48	143	137	124	2.85494	1.03315	3.12e-08	RING/U-box superfamily protein
AT1G14205.1	11	16	17	36	37	28	0.843288	0.924376	0.00577586	Ribosomal L18p/L5e family protein
AT1G14210.1	249	251	287	317	368	409	4.34218	0.214042	0.180511	Ribonuclease T2 family protein
AT1G14220.1	27	24	28	58	45	45	1.05233	0.635699	0.110315	Ribonuclease T2 family protein
AT1G14225.1	1	0	0	0	0	0	-2.66832	-1.97826	1	unknown protein
AT1G14230.1	326	262	300	325	352	296	4.54238	-0.138975	0.356156	GDA1/CD39 nucleoside phosphatase family protein
AT1G14240.1	258	237	230	567	253	246	3.95158	0.283024	0.443837	GDA1/CD39 nucleoside phosphatase family protein
AT1G14240.2	258	239	232	569	252	248	3.95649	0.279499	0.452259	GDA1/CD39 nucleoside phosphatase family protein
AT1G14240.3	241	230	217	527	240	230	3.86937	0.262544	0.489944	GDA1/CD39 nucleoside phosphatase family protein
AT1G14240.4	259	241	232	575	255	252	3.96771	0.291371	0.41557	GDA1/CD39 nucleoside phosphatase family protein
AT1G14250.1	87	38	80	212	93	70	3.9347	0.572841	0.406299	GDA1/CD39 nucleoside phosphatase family protein
AT1G14260.1	20	11	14	20	13	13	0.445989	-0.235843	0.867419	RING/FYVE/PHD zinc finger superfamily protein
AT1G14260.2	21	12	17	20	17	15	0.590892	-0.211738	0.821403	RING/FYVE/PHD zinc finger superfamily protein
AT1G14270.1	524	741	625	781	934	669	5.74646	0.0642554	0.738716	CAAX amino terminal protease family protein
AT1G14270.2	490	686	580	739	881	635	5.66453	0.0902674	0.549266	CAAX amino terminal protease family protein
AT1G14270.3	506	696	589	747	893	640	5.69077	0.0775127	0.625034	CAAX amino terminal protease family protein
AT1G14270.4	481	654	556	705	860	606	5.60562	0.0891819	0.551376	CAAX amino terminal protease family protein
AT1G14280.1	409	540	449	710	674	683	5.402	0.304869	0.011785	phytochrome kinase substrate 2
AT1G14290.1	300	271	252	487	445	497	4.47845	0.535966	1.79e-06	sphingoid base hydroxylase 2
AT1G14300.1	181	192	186	249	254	233	3.91675	0.12992	0.503765	ARM repeat superfamily protein
AT1G14300.2	174	186	169	237	239	213	3.84362	0.114218	0.600251	ARM repeat superfamily protein
AT1G14310.1	117	136	129	168	156	145	3.38769	0.0288369	1	Haloacid dehalogenase-like hydrolase (HAD) superfamily protein
AT1G14315.1	0	0	0	0	1	0	-2.68612	1.7795	1	F-box and associated interaction domains-containing protein
AT1G14315.2	0	0	0	0	0	0	-2.70401	0	1	F-box and associated interaction domains-containing protein
AT1G14320.1	8103	8771	8055	9804	11069	8380	9.27895	-0.0417169	0.843194	Ribosomal protein L16p/L10e family protein
AT1G14320.2	5634	6143	5664	6924	7849	5879	8.78317	-0.0292017	0.960188	Ribosomal protein L16p/L10e family protein
AT1G14330.1	171	141	167	275	245	277	3.71922	0.47057	0.000798601	Galactose oxidase/kelch repeat superfamily protein
AT1G14340.1	151	159	146	227	252	203	3.80514	0.311742	0.0238838	RNA-binding (RRM/RBD/RNP motifs) family protein
AT1G14345.1	959	1291	948	1257	1529	1087	6.53717	0.00761103	1	NAD(P)-linked oxidoreductase superfamily protein
AT1G14350.1	235	304	255	296	282	242	4.60431	-0.220208	0.101588	Duplicated homeodomain-like superfamily protein
AT1G14350.2	234	304	253	291	282	240	4.60365	-0.227064	0.100001	Duplicated homeodomain-like superfamily protein
AT1G14360.1	267	273	253	338	379	279	4.51394	0.0585001	0.8105	UDP-galactose transporter 3
AT1G14370.1	69	72	97	105	90	127	2.8002	0.176783	0.632045	protein kinase 2A
AT1G14380.1	391	469	395	523	498	479	5.14611	-0.00563885	1	IQ-domain 28
AT1G14380.2	343	427	345	462	453	413	4.97255	-0.0121501	1	IQ-domain 28
AT1G14380.3	377	449	383	515	481	467	5.1089	0.0120265	1	IQ-domain 28
AT1G14390.1	58	32	53	59	69	53	1.88372	0.06437	1	Leucine-rich repeat protein kinase family protein
AT1G14400.1	1353	1144	1199	1759	1864	1643	6.78975	0.241552	0.0133632	ubiquitin carrier protein 1
AT1G14400.2	1021	881	947	1363	1456	1255	6.42274	0.245538	0.0178652	ubiquitin carrier protein 1
AT1G14410.1	345	463	390	421	540	377	4.8982	-0.111686	0.543991	ssDNA-binding transcriptional regulator
AT1G14420.1	0	2	0	0	0	2	-2.35366	-0.214789	1	Pectate lyase family protein
AT1G14430.1	68	108	87	104	94	99	2.8127	-0.0879964	0.88574	glyoxal oxidase-related protein
AT1G14440.1	185	224	207	202	277	171	4.14071	-0.197238	0.276078	homeobox protein 31
AT1G14440.2	158	202	181	190	256	160	4.02674	-0.110143	0.66335	homeobox protein 31
AT1G14450.1	751	697	632	901	1047	867	5.8252	0.16836	0.154926	NADH dehydrogenase (ubiquinone)s
AT1G14455.1	8	5	4	3	8	10	-0.845146	0.0483587	1	unknown protein
AT1G14460.1	337	337	361	351	360	286	4.68227	-0.323913	0.000221796	AAA-type ATPase family protein
AT1G14470.1	15	16	15	25	22	20	0.642332	0.272727	0.742179	Pentatricopeptide repeat (PPR) superfamily protein
AT1G14480.1	18	19	20	43	34	24	1.35029	0.551938	0.158021	Ankyrin repeat family protein
AT1G14480.2	16	15	18	39	30	17	1.11928	0.536443	0.218773	Ankyrin repeat family protein
AT1G14490.1	8	18	10	13	21	5	0.33868	-0.158292	0.994262	Predicted AT-hook DNA-binding family protein
AT1G14500.1	1	2	3	3	3	1	-1.76839	-0.0452228	1	Ankyrin repeat family protein
AT1G14510.1	419	451	419	698	686	626	5.24566	0.374666	1.26e-05	alfin-like 7
AT1G14520.1	35	17	14	51	50	44	1.37863	0.864296	0.0232315	myo-inositol oxygenase 1
AT1G14520.2	32	16	14	49	44	44	1.28276	0.875054	0.0218536	myo-inositol oxygenase 1
AT1G14530.1	63	56	74	87	82	72	2.40276	0.0505484	1	Protein of unknown function (DUF1084)
AT1G14530.2	69	68	87	105	98	86	2.66471	0.0981007	0.841215	Protein of unknown function (DUF1084)
AT1G14540.1	101	51	53	94	75	118	2.7329	0.238035	0.79738	Peroxidase superfamily protein
AT1G14550.1	9	10	6	14	14	11	-0.16093	0.369308	0.652859	Peroxidase superfamily protein
AT1G14560.1	186	204	204	216	246	206	4.00671	-0.0990938	0.59336	Mitochondrial substrate carrier family protein
AT1G14570.1	554	589	516	782	773	669	5.60899	0.15562	0.0807491	UBX domain-containing protein
AT1G14570.2	538	564	494	753	748	642	5.55935	0.157722	0.0806833	UBX domain-containing protein
AT1G14570.3	536	570	493	736	749	641	5.53845	0.143618	0.103131	UBX domain-containing protein
AT1G14570.4	513	539	465	704	718	608	5.4773	0.15269	0.0908206	UBX domain-containing protein
AT1G14580.1	320	368	373	407	434	363	4.84069	-0.0871675	0.709835	C2H2-like zinc finger protein
AT1G14580.2	316	368	367	402	428	359	4.82321	-0.0912356	0.6995	C2H2-like zinc finger protein
AT1G14590.1	101	102	98	114	133	78	3.23081	-0.160301	0.471974	Nucleotide-diphospho-sugar transferase family protein
AT1G14600.1	53	55	36	43	25	31	1.74902	-0.799301	0.00896172	Homeodomain-like superfamily protein
AT1G14610.1	2252	2200	2106	2357	2334	2103	7.29719	-0.215724	0.0153693	valyl-tRNA synthetase / valine--tRNA ligase (VALRS)
AT1G14620.1	301	232	298	384	368	394	4.54086	0.197845	0.286689	decoy
AT1G14620.2	269	210	269	348	326	344	4.37381	0.178	0.345269	decoy
AT1G14630.1	58	56	39	95	99	71	2.37885	0.521678	0.0427628	unknown protein
AT1G14640.1	62	70	67	78	77	78	2.47367	-0.0396306	1	SWAP (Suppressor-of-White-APricot)/surp domain-containing protein
AT1G14642.1	0	0	0	0	1	1	-2.24432	2.55896	0.817441	unknown protein
AT1G14650.1	947	927	950	1041	1113	898	6.12425	-0.159496	0.0949553	SWAP (Suppressor-of-White-APricot)/surp domain-containing protein / ubiquitin family protein
AT1G14650.2	911	903	916	999	1057	846	6.05965	-0.183467	0.0472623	SWAP (Suppressor-of-White-APricot)/surp domain-containing protein / ubiquitin family protein
AT1G14660.1	54	59	77	84	97	70	2.66785	0.130001	0.76015	Na+/H+ exchanger 8
AT1G14660.2	55	56	75	82	99	69	2.62975	0.154312	0.686657	Na+/H+ exchanger 8
AT1G14670.1	1644	1429	1449	1836	1915	1747	6.7566	0.0147931	1	Endomembrane protein 70 protein family
AT1G14680.1	12	11	10	18	16	14	0.209809	0.26983	0.779943	unknown protein
AT1G14685.1	280	287	294	463	476	407	4.73082	0.375596	9.92e-05	basic pentacysteine 2
AT1G14685.2	273	288	300	458	480	410	4.7425	0.377572	0.000208505	basic pentacysteine 2
AT1G14685.3	278	302	308	475	500	418	4.78924	0.380102	0.000164263	basic pentacysteine 2
AT1G14686.1	1	2	2	2	1	1	-1.70369	-0.544464	1	ENTH/ANTH/VHS superfamily protein
AT1G14687.1	12	17	14	21	25	20	0.980975	0.347566	0.562057	homeobox protein 32
AT1G14688.1	0	0	0	0	0	0	-2.70401	0	1	unknown protein
AT1G14690.1	440	439	397	613	605	493	5.26542	0.153882	0.198126	microtubule-associated protein 65-7
AT1G14690.2	430	429	390	593	592	474	5.23072	0.139781	0.254635	microtubule-associated protein 65-7
AT1G14700.1	399	491	403	656	876	532	5.31329	0.398443	0.00016716	purple acid phosphatase 3
AT1G14700.2	370	459	367	617	827	498	5.22525	0.423135	0.000113275	purple acid phosphatase 3
AT1G14710.1	1002	1095	1022	1212	1218	1048	6.30483	-0.110648	0.237457	hydroxyproline-rich glycoprotein family protein
AT1G14710.2	990	1072	1013	1200	1211	1032	6.2913	-0.105254	0.266203	hydroxyproline-rich glycoprotein family protein
AT1G14720.1	446	524	468	669	755	677	5.37445	0.281973	0.00274527	xyloglucan endotransglucosylase/hydrolase 28
AT1G14730.1	251	144	188	286	248	200	3.9997	0.0544918	0.981502	Cytochrome b561/ferric reductase transmembrane protein family
AT1G14740.1	704	661	684	969	921	1064	5.73703	0.269857	0.026275	Protein of unknown function (DUF1423)
AT1G14750.1	19	23	17	26	16	17	0.673945	-0.26306	0.802802	Cyclin family protein
AT1G14750.2	8	12	11	15	8	9	-0.0679303	-0.218186	0.927627	Cyclin family protein
AT1G14755.1	0	0	0	1	1	0	-2.70405	2.55231	0.8105	S locus-related glycoprotein 1 (SLR1) binding pollen coat protein family
AT1G14760.1	1	2	0	0	3	0	-1.85616	-0.239856	1	KNOX Arabidopsis thaliana meinox
AT1G14760.2	1	3	3	4	7	0	-1.27806	0.363307	1	KNOX Arabidopsis thaliana meinox
AT1G14760.3	1	1	3	3	6	0	-1.66832	0.542697	1	KNOX Arabidopsis thaliana meinox
AT1G14770.1	87	94	107	133	115	119	2.92024	0.0825993	0.865555	RING/FYVE/PHD zinc finger superfamily protein
AT1G14770.2	82	88	96	124	108	111	2.83304	0.0998649	0.803629	RING/FYVE/PHD zinc finger superfamily protein
AT1G14780.1	69	38	51	84	53	64	2.10527	0.0802726	1	MAC/Perforin domain-containing protein
AT1G14790.1	144	151	152	178	203	170	3.772	0.0329786	1	RNA-dependent RNA polymerase 1
AT1G14800.1	2	0	0	0	1	0	-2.45589	-1.00206	1	Nucleic acid-binding, OB-fold-like protein
AT1G14810.1	1346	1527	1379	1435	1621	1310	6.60798	-0.230448	0.00610525	semialdehyde dehydrogenase family protein
AT1G14820.1	150	135	129	182	210	169	3.66741	0.169273	0.350863	Sec14p-like phosphatidylinositol transfer family protein
AT1G14820.2	145	135	127	185	209	167	3.66598	0.193893	0.245424	Sec14p-like phosphatidylinositol transfer family protein
AT1G14820.3	161	147	142	202	226	188	3.78601	0.184316	0.248519	Sec14p-like phosphatidylinositol transfer family protein
AT1G14830.1	1279	1113	1208	1489	1369	1242	6.5196	-0.0822184	0.545734	DYNAMIN-like 1C
AT1G14840.1	483	579	518	499	551	409	5.42694	-0.385082	2.25e-06	microtubule-associated proteins 70-4
AT1G14840.2	468	554	502	483	538	397	5.38107	-0.374299	3.85e-06	microtubule-associated proteins 70-4
AT1G14850.1	630	644	635	679	681	617	5.49026	-0.216587	0.0678276	nucleoporin 155
AT1G14860.1	95	58	78	150	105	147	2.64474	0.539139	0.0399346	nudix hydrolase homolog 18
AT1G14870.1	1132	532	788	1419	1057	1275	6.27807	0.346989	0.366558	PLANT CADMIUM RESISTANCE 2
AT1G14880.1	4	1	2	1	1	2	-1.16201	-0.996544	0.815	PLANT CADMIUM RESISTANCE 1
AT1G14890.1	148	156	144	248	229	193	3.93242	0.311958	0.0174492	Plant invertase/pectin methylesterase inhibitor superfamily protein
AT1G14900.1	391	396	407	493	515	430	5.34014	-0.00171044	1	high mobility group A
AT1G14910.1	406	384	398	515	504	527	5.01714	0.117123	0.531639	ENTH/ANTH/VHS superfamily protein
AT1G14920.1	556	535	536	578	655	634	5.32407	-0.0655041	0.795086	GRAS family transcription factor family protein
AT1G14930.1	3	1	3	3	1	3	-1.4183	-0.252362	1	Polyketide cyclase/dehydrase and lipid transport superfamily protein
AT1G14940.1	0	0	0	2	0	0	-2.63352	2.55486	0.8105	Polyketide cyclase/dehydrase and lipid transport superfamily protein
AT1G14940.2	0	0	0	2	0	0	-2.63352	2.55486	0.8105	Polyketide cyclase/dehydrase and lipid transport superfamily protein
AT1G14950.1	0	0	0	0	0	0	-2.45615	0	1	Polyketide cyclase/dehydrase and lipid transport superfamily protein
AT1G14960.1	117	81	137	186	92	153	2.89943	0.10208	1	Polyketide cyclase/dehydrase and lipid transport superfamily protein
AT1G14970.1	97	95	94	137	132	120	3.11611	0.175734	0.44253	O-fucosyltransferase family protein
[truncated: 31,952 more rows]
[truncated: 1 more columns]
